# Supplementary material for: The seafloor record of explosive submarine volcanic eruptions
Source: Research Square preprint supplement (doi:10.21203/rs.3.rs-6630366/v1), 2025-06-12
Supplement: Supplementary file 1 [file 2bfcc32e5d2204d68d9e9541.xlsx]

## Sheet: SW-64
Record Number	Sample Name	Measurement Date Time	Depth (cm)	MICRONS									mm									PHI									Graphical Standard Deviation						Mode	Kurtosis [3]	GSD [3]	Skew [3]	VOL% GRAINSIZE BINS
																																									<1 um	1-1.16 um	1.16-1.38 um	1.38-1.64 um	1.64-2 um	2-2.32 um	2.32-2.76 um	2.76-3.28 um	3.28-4 um
				Dx (5)	Dx (10)	Dx (16)	Dx (25)	Dx (50)	Dx (75)	Dx (84)	Dx (90)	Dx (95)	mm (5)	mm (10)	mm (16)	mm (25)	mm (50)	mm (75)	mm (84)	mm (90)	mm (95)	Φ(5)	Φ (10)	Φ (16)	Φ (25)	Φ (50)	Φ (75)	Φ (84)	Φ (90)	Φ (95)	84-16	(84-16)/4	95-5	(95-5)/6.6	σ	Sorting					0.5	1.08	1.149	1.51	1.82	2.16	2.54	3.02	3.64
1	TAN2206_SW-64_0-1cm	2024-05-09 12:23:52	0.5	2.16	3.12	4.35	6.35	13.1	23.4	29.7	36.3	46.2	0.00216	0.00312	0.00435	0.00635	0.0131	0.0234	0.0297	0.0363	0.0462	8.85475	8.32424	7.84477	7.29903	6.25429	5.41735	5.07339	4.78389	4.43596	-2.77138	-0.692844	-4.41879	-0.669514	1.36236		17.5	32.367	2.581	4.227	0.85	0.32	0.55	0.87	1.65	1.63	2.29	2.67	3.49
2	TAN2206_SW-64_0-1cm	2024-05-09 12:24:17	0.5	2.16	3.12	4.35	6.35	13.1	23.4	29.7	36.4	46.3	0.00216	0.00312	0.00435	0.00635	0.0131	0.0234	0.0297	0.0364	0.0463	8.85475	8.32424	7.84477	7.29903	6.25429	5.41735	5.07339	4.77992	4.43284	-2.77138	-0.692844	-4.42191	-0.669986	1.36283		17.5	43.399	2.589	5.044	0.85	0.32	0.55	0.87	1.64	1.63	2.29	2.67	3.49
3	TAN2206_SW-64_0-1cm	2024-05-09 12:24:41	0.5	2.16	3.13	4.36	6.37	13.1	23.5	29.9	36.7	47.3	0.00216	0.00313	0.00436	0.00637	0.0131	0.0235	0.0299	0.0367	0.0473	8.85475	8.31962	7.84146	7.29449	6.25429	5.4112	5.06371	4.76808	4.40202	-2.77775	-0.694436	-4.45274	-0.674657	1.36909		17.5	50.4	2.614	5.73	0.83	0.31	0.54	0.86	1.64	1.63	2.29	2.67	3.48
4	TAN2206_SW-64_0-1cm	2024-05-09 12:25:04	0.5	2.16	3.13	4.36	6.37	13.1	23.5	29.8	36.6	46.8	0.00216	0.00313	0.00436	0.00637	0.0131	0.0235	0.0298	0.0366	0.0468	8.85475	8.31962	7.84146	7.29449	6.25429	5.4112	5.06854	4.77201	4.41735	-2.77291	-0.693228	-4.43741	-0.672334	1.36556		17.5	66.382	2.609	6.678	0.83	0.31	0.54	0.87	1.64	1.63	2.29	2.67	3.48
5	TAN2206_SW-64_0-1cm	2024-05-09 12:25:28	0.5	2.17	3.13	4.37	6.37	13.1	23.5	30	36.8	47.4	0.00217	0.00313	0.00437	0.00637	0.0131	0.0235	0.03	0.0368	0.0474	8.84809	8.31962	7.83815	7.29449	6.25429	5.4112	5.05889	4.76415	4.39897	-2.77926	-0.694814	-4.44912	-0.674109	1.36892		17.5	67.901	2.64	7.096	0.83	0.31	0.54	0.86	1.64	1.63	2.28	2.66	3.47
6	TAN2206_SW-64_0-1cm	2024-05-09 12:25:53	0.5	2.16	3.13	4.36	6.36	13.1	23.4	29.7	36.4	46.5	0.00216	0.00313	0.00436	0.00636	0.0131	0.0234	0.0297	0.0364	0.0465	8.85475	8.31962	7.84146	7.29676	6.25429	5.41735	5.07339	4.77992	4.42663	-2.76806	-0.692016	-4.42813	-0.670928	1.36294		17.5	56.127	2.599	6.041	0.83	0.31	0.54	0.87	1.64	1.63	2.29	2.67	3.48
7	TAN2206_SW-64_0-1cm	2024-05-09 12:26:17	0.5	2.16	3.13	4.36	6.37	13.1	23.4	29.8	36.4	46.4	0.00216	0.00313	0.00436	0.00637	0.0131	0.0234	0.0298	0.0364	0.0464	8.85475	8.31962	7.84146	7.29449	6.25429	5.41735	5.06854	4.77992	4.42973	-2.77291	-0.693228	-4.42502	-0.670458	1.36369		17.5	34.09	2.584	4.445	0.83	0.31	0.54	0.86	1.64	1.63	2.29	2.67	3.48
8	TAN2206_SW-64_0-1cm	2024-05-09 12:26:41	0.5	2.16	3.12	4.35	6.35	13.1	23.3	29.6	36	45.6	0.00216	0.00312	0.00435	0.00635	0.0131	0.0233	0.0296	0.036	0.0456	8.85475	8.32424	7.84477	7.29903	6.25429	5.42353	5.07826	4.79586	4.45482	-2.76651	-0.691627	-4.39993	-0.666656	1.35828		17.5	24.37	2.563	3.541	0.84	0.31	0.55	0.87	1.65	1.64	2.29	2.67	3.49
9	TAN2206_SW-64_0-1cm	2024-05-09 12:27:05	0.5	2.16	3.13	4.37	6.37	13.1	23.4	29.7	36.3	46.1	0.00216	0.00313	0.00437	0.00637	0.0131	0.0234	0.0297	0.0363	0.0461	8.85475	8.31962	7.83815	7.29449	6.25429	5.41735	5.07339	4.78389	4.43909	-2.76476	-0.691189	-4.41566	-0.66904	1.36023		17.5	31.702	2.572	4.087	0.83	0.31	0.54	0.86	1.64	1.63	2.28	2.66	3.48
10	TAN2206_SW-64_0-1cm	2024-05-09 12:27:28	0.5	2.17	3.13	4.37	6.38	13.1	23.4	29.8	36.4	46.4	0.00217	0.00313	0.00437	0.00638	0.0131	0.0234	0.0298	0.0364	0.0464	8.84809	8.31962	7.83815	7.29223	6.25429	5.41735	5.06854	4.77992	4.42973	-2.76961	-0.692402	-4.41836	-0.669448	1.36185		17.5	33.967	2.582	4.407	0.83	0.31	0.54	0.86	1.64	1.63	2.28	2.66	3.47
11	Average of 'TAN2206_SW-64_0-1cm'	2024-05-09 12:23:52	0.5	2.16	3.13	4.36	6.36	13.1	23.4	29.8	36.4	46.5	0.00216	0.00313	0.00436	0.00636	0.0131	0.0234	0.0298	0.0364	0.0465	8.85475	8.31962	7.84146	7.29676	6.25429	5.41735	5.06854	4.77992	4.42663	-2.77291	-0.693228	-4.42813	-0.670928	1.36416		17.5	58.307	2.593	5.847	0.83	0.31	0.54	0.87	1.64	1.63	2.29	2.67	3.48
12	TAN2206_SW-64_1-2cm	2024-05-09 12:34:37	1.5	2.31	3.37	4.74	6.96	14.4	25.4	32	38.7	48.1	0.00231	0.00337	0.00474	0.00696	0.0144	0.0254	0.032	0.0387	0.0481	8.75789	8.21304	7.7209	7.1667	6.11779	5.29903	4.96578	4.69152	4.37782	-2.75511	-0.688778	-4.38007	-0.663647	1.35243		19.7	2.359	2.52	1.42	0.58	0.26	0.46	0.76	1.48	1.49	2.1	2.45	3.19
13	TAN2206_SW-64_1-2cm	2024-05-09 12:35:01	1.5	2.31	3.35	4.71	6.9	14.3	25.3	31.7	38.4	47.7	0.00231	0.00335	0.00471	0.0069	0.0143	0.0253	0.0317	0.0384	0.0477	8.75789	8.22162	7.73006	7.17919	6.12784	5.30472	4.97937	4.70275	4.38987	-2.75068	-0.687671	-4.36802	-0.661822	1.34949		19.6	2.328	2.517	1.412	0.58	0.26	0.46	0.76	1.5	1.5	2.12	2.47	3.23
14	TAN2206_SW-64_1-2cm	2024-05-09 12:35:24	1.5	2.3	3.35	4.7	6.88	14.2	25.2	31.7	38.3	47.5	0.0023	0.00335	0.0047	0.00688	0.0142	0.0252	0.0317	0.0383	0.0475	8.76415	8.22162	7.73312	7.18338	6.13797	5.31043	4.97937	4.70651	4.39593	-2.75375	-0.688438	-4.36822	-0.661852	1.35029		19.6	2.299	2.516	1.406	0.58	0.26	0.46	0.76	1.5	1.51	2.12	2.48	3.24
15	TAN2206_SW-64_1-2cm	2024-05-09 12:35:50	1.5	2.3	3.35	4.7	6.88	14.2	25.2	31.7	38.3	47.5	0.0023	0.00335	0.0047	0.00688	0.0142	0.0252	0.0317	0.0383	0.0475	8.76415	8.22162	7.73312	7.18338	6.13797	5.31043	4.97937	4.70651	4.39593	-2.75375	-0.688438	-4.36822	-0.661852	1.35029		19.6	2.222	2.516	1.39	0.59	0.26	0.47	0.77	1.5	1.51	2.12	2.48	3.23
16	TAN2206_SW-64_1-2cm	2024-05-09 12:36:15	1.5	2.3	3.35	4.71	6.89	14.3	25.3	31.8	38.4	47.7	0.0023	0.00335	0.00471	0.00689	0.0143	0.0253	0.0318	0.0384	0.0477	8.76415	8.22162	7.73006	7.18128	6.12784	5.30472	4.97483	4.70275	4.38987	-2.75523	-0.688807	-4.37428	-0.66277	1.35158		19.6	2.292	2.518	1.405	0.58	0.26	0.47	0.76	1.5	1.51	2.12	2.47	3.23
17	TAN2206_SW-64_1-2cm	2024-05-09 12:36:39	1.5	2.3	3.34	4.7	6.88	14.2	25.2	31.6	38.2	47.4	0.0023	0.00334	0.0047	0.00688	0.0142	0.0252	0.0316	0.0382	0.0474	8.76415	8.22594	7.73312	7.18338	6.13797	5.31043	4.98393	4.71028	4.39897	-2.74919	-0.687298	-4.36518	-0.661391	1.34869		19.6	2.293	2.516	1.403	0.59	0.26	0.47	0.76	1.5	1.51	2.13	2.48	3.24
18	TAN2206_SW-64_1-2cm	2024-05-09 12:37:04	1.5	2.3	3.35	4.7	6.89	14.3	25.2	31.7	38.3	47.6	0.0023	0.00335	0.0047	0.00689	0.0143	0.0252	0.0317	0.0383	0.0476	8.76415	8.22162	7.73312	7.18128	6.12784	5.31043	4.97937	4.70651	4.39289	-2.75375	-0.688438	-4.37126	-0.662311	1.35075		19.6	2.289	2.517	1.403	0.59	0.26	0.46	0.76	1.5	1.51	2.12	2.47	3.23
19	TAN2206_SW-64_1-2cm	2024-05-09 12:37:28	1.5	2.3	3.35	4.71	6.9	14.3	25.3	31.8	38.4	47.7	0.0023	0.00335	0.00471	0.0069	0.0143	0.0253	0.0318	0.0384	0.0477	8.76415	8.22162	7.73006	7.17919	6.12784	5.30472	4.97483	4.70275	4.38987	-2.75523	-0.688807	-4.37428	-0.66277	1.35158		19.6	2.293	2.518	1.404	0.59	0.26	0.46	0.76	1.5	1.51	2.12	2.47	3.22
20	TAN2206_SW-64_1-2cm	2024-05-09 12:37:53	1.5	2.3	3.35	4.7	6.89	14.3	25.2	31.7	38.3	47.5	0.0023	0.00335	0.0047	0.00689	0.0143	0.0252	0.0317	0.0383	0.0475	8.76415	8.22162	7.73312	7.18128	6.12784	5.31043	4.97937	4.70651	4.39593	-2.75375	-0.688438	-4.36822	-0.661852	1.35029		19.6	2.251	2.517	1.396	0.59	0.26	0.47	0.77	1.5	1.51	2.12	2.47	3.23
21	TAN2206_SW-64_1-2cm	2024-05-09 12:38:17	1.5	2.3	3.35	4.71	6.9	14.3	25.3	31.8	38.4	47.7	0.0023	0.00335	0.00471	0.0069	0.0143	0.0253	0.0318	0.0384	0.0477	8.76415	8.22162	7.73006	7.17919	6.12784	5.30472	4.97483	4.70275	4.38987	-2.75523	-0.688807	-4.37428	-0.66277	1.35158		19.7	2.3	2.519	1.406	0.58	0.26	0.47	0.76	1.5	1.51	2.12	2.47	3.22
22	Average of 'TAN2206_SW-64_1-2cm'	2024-05-09 12:34:37	1.5	2.3	3.35	4.71	6.9	14.3	25.3	31.7	38.3	47.6	0.0023	0.00335	0.00471	0.0069	0.0143	0.0253	0.0317	0.0383	0.0476	8.76415	8.22162	7.73006	7.17919	6.12784	5.30472	4.97937	4.70651	4.39289	-2.75068	-0.687671	-4.37126	-0.662311	1.34998		19.6	2.294	2.518	1.405	0.59	0.26	0.46	0.76	1.5	1.51	2.12	2.47	3.23
23	TAN2206_SW-64_2-3cm	2024-05-09 12:45:28	2.5	2.37	3.54	5.08	7.65	16.3	28.7	35.9	43.3	53.4	0.00237	0.00354	0.00508	0.00765	0.0163	0.0287	0.0359	0.0433	0.0534	8.7209	8.14203	7.62096	7.03032	5.93898	5.12281	4.79987	4.52949	4.22702	-2.82108	-0.705271	-4.49388	-0.680891	1.38616		22.9	2.078	2.587	1.344	0.62	0.26	0.45	0.71	1.37	1.37	1.93	2.24	2.91
24	TAN2206_SW-64_2-3cm	2024-05-09 12:45:53	2.5	2.37	3.54	5.06	7.63	16.3	28.6	35.8	43	52.8	0.00237	0.00354	0.00506	0.00763	0.0163	0.0286	0.0358	0.043	0.0528	8.7209	8.14203	7.62665	7.0341	5.93898	5.12784	4.8039	4.53952	4.24332	-2.82275	-0.705688	-4.47758	-0.678421	1.38411		22.9	1.644	2.58	1.266	0.61	0.26	0.44	0.71	1.37	1.38	1.93	2.25	2.92
25	TAN2206_SW-64_2-3cm	2024-05-09 12:46:17	2.5	2.37	3.54	5.07	7.63	16.3	28.7	36	43.3	53.6	0.00237	0.00354	0.00507	0.00763	0.0163	0.0287	0.036	0.0433	0.0536	8.7209	8.14203	7.6238	7.0341	5.93898	5.12281	4.79586	4.52949	4.22162	-2.82794	-0.706985	-4.49927	-0.681708	1.38869		22.9	2.097	2.59	1.35	0.61	0.26	0.45	0.71	1.37	1.37	1.93	2.25	2.92
26	TAN2206_SW-64_2-3cm	2024-05-09 12:46:41	2.5	2.37	3.54	5.06	7.62	16.3	28.7	35.8	43	52.9	0.00237	0.00354	0.00506	0.00762	0.0163	0.0287	0.0358	0.043	0.0529	8.7209	8.14203	7.62665	7.03599	5.93898	5.12281	4.8039	4.53952	4.24059	-2.82275	-0.705688	-4.48031	-0.678835	1.38452		22.9	1.642	2.581	1.266	0.61	0.26	0.45	0.71	1.37	1.38	1.93	2.25	2.92
27	TAN2206_SW-64_2-3cm	2024-05-09 12:47:05	2.5	2.38	3.54	5.08	7.65	16.3	28.8	36.1	43.4	53.5	0.00238	0.00354	0.00508	0.00765	0.0163	0.0288	0.0361	0.0434	0.0535	8.71482	8.14203	7.62096	7.03032	5.93898	5.11779	4.79186	4.52616	4.22432	-2.8291	-0.707275	-4.49051	-0.68038	1.38765		23	1.918	2.587	1.314	0.6	0.26	0.44	0.71	1.37	1.37	1.93	2.24	2.91
28	TAN2206_SW-64_2-3cm	2024-05-09 12:47:28	2.5	2.38	3.55	5.1	7.68	16.4	29	36.4	43.9	54.7	0.00238	0.00355	0.0051	0.00768	0.0164	0.029	0.0364	0.0439	0.0547	8.71482	8.13797	7.61529	7.02468	5.93016	5.1078	4.77992	4.50964	4.19232	-2.83537	-0.708842	-4.52251	-0.685228	1.39407		23	44.65	2.627	4.854	0.6	0.26	0.44	0.71	1.36	1.37	1.92	2.23	2.89
29	TAN2206_SW-64_2-3cm	2024-05-09 12:47:54	2.5	2.38	3.54	5.08	7.65	16.3	28.8	36	43.4	53.5	0.00238	0.00354	0.00508	0.00765	0.0163	0.0288	0.036	0.0434	0.0535	8.71482	8.14203	7.62096	7.03032	5.93898	5.11779	4.79586	4.52616	4.22432	-2.8251	-0.706274	-4.49051	-0.68038	1.38665		23	1.953	2.588	1.322	0.61	0.26	0.45	0.71	1.37	1.37	1.93	2.24	2.9
30	TAN2206_SW-64_2-3cm	2024-05-09 12:48:19	2.5	2.37	3.54	5.07	7.63	16.3	28.7	35.8	43.1	53.2	0.00237	0.00354	0.00507	0.00763	0.0163	0.0287	0.0358	0.0431	0.0532	8.7209	8.14203	7.6238	7.0341	5.93898	5.12281	4.8039	4.53617	4.23243	-2.8199	-0.704975	-4.48847	-0.680071	1.38505		22.8	1.979	2.584	1.325	0.61	0.26	0.45	0.71	1.37	1.38	1.93	2.25	2.91
31	TAN2206_SW-64_2-3cm	2024-05-09 12:48:43	2.5	2.37	3.54	5.08	7.65	16.3	28.7	35.9	43.1	52.9	0.00237	0.00354	0.00508	0.00765	0.0163	0.0287	0.0359	0.0431	0.0529	8.7209	8.14203	7.62096	7.03032	5.93898	5.12281	4.79987	4.53617	4.24059	-2.82108	-0.705271	-4.48031	-0.678835	1.38411		23	1.634	2.581	1.264	0.61	0.26	0.45	0.71	1.37	1.37	1.93	2.24	2.9
32	TAN2206_SW-64_2-3cm	2024-05-09 12:49:09	2.5	2.38	3.54	5.08	7.67	16.4	28.8	36	43.3	53.4	0.00238	0.00354	0.00508	0.00767	0.0164	0.0288	0.036	0.0433	0.0534	8.71482	8.14203	7.62096	7.02656	5.93016	5.11779	4.79586	4.52949	4.22702	-2.8251	-0.706274	-4.48781	-0.679971	1.38624		22.9	2	2.586	1.328	0.61	0.26	0.44	0.71	1.37	1.37	1.93	2.24	2.9
33	Average of 'TAN2206_SW-64_2-3cm'	2024-05-09 12:45:28	2.5	2.37	3.54	5.08	7.65	16.3	28.8	36	43.3	53.4	0.00237	0.00354	0.00508	0.00765	0.0163	0.0288	0.036	0.0433	0.0534	8.7209	8.14203	7.62096	7.03032	5.93898	5.11779	4.79586	4.52949	4.22702	-2.8251	-0.706274	-4.49388	-0.680891	1.38717		22.9	13.521	2.589	2.071	0.61	0.26	0.45	0.71	1.37	1.37	1.93	2.24	2.91
34	TAN2206_SW-64_3-4cm	2024-05-09 12:56:49	3.5	2.47	3.73	5.4	8.2	17.7	31.3	39.2	47.1	57.8	0.00247	0.00373	0.0054	0.0082	0.0177	0.0313	0.0392	0.0471	0.0578	8.66127	8.06661	7.53282	6.93016	5.82011	4.99769	4.673	4.40813	4.11279	-2.85982	-0.714956	-4.54849	-0.689165	1.40412		25.2	1.685	2.618	1.269	0.54	0.24	0.41	0.66	1.27	1.27	1.79	2.08	2.71
35	TAN2206_SW-64_3-4cm	2024-05-09 12:57:15	3.5	2.47	3.73	5.39	8.17	17.7	31.4	39.3	47.3	58.1	0.00247	0.00373	0.00539	0.00817	0.0177	0.0314	0.0393	0.0473	0.0581	8.66127	8.06661	7.5355	6.93545	5.82011	4.99309	4.66933	4.40202	4.10532	-2.86617	-0.716543	-4.55596	-0.690296	1.40684		25.2	1.704	2.623	1.278	0.54	0.24	0.41	0.66	1.27	1.28	1.8	2.09	2.72
36	TAN2206_SW-64_3-4cm	2024-05-09 12:57:40	3.5	2.46	3.72	5.37	8.15	17.7	31.3	39.1	47	57.7	0.00246	0.00372	0.00537	0.00815	0.0177	0.0313	0.0391	0.047	0.0577	8.66713	8.07048	7.54086	6.93898	5.82011	4.99769	4.67669	4.4112	4.11528	-2.86417	-0.716044	-4.55184	-0.689673	1.40572		25.2	1.674	2.619	1.268	0.54	0.24	0.41	0.66	1.28	1.28	1.8	2.1	2.73
37	TAN2206_SW-64_3-4cm	2024-05-09 12:58:04	3.5	2.47	3.72	5.38	8.16	17.7	31.3	39.2	47	57.8	0.00247	0.00372	0.00538	0.00816	0.0177	0.0313	0.0392	0.047	0.0578	8.66127	8.07048	7.53818	6.93722	5.82011	4.99769	4.673	4.4112	4.11279	-2.86518	-0.716294	-4.54849	-0.689165	1.40546		25.3	1.634	2.619	1.26	0.54	0.24	0.41	0.66	1.28	1.28	1.8	2.09	2.72
38	TAN2206_SW-64_3-4cm	2024-05-09 12:58:27	3.5	2.47	3.73	5.39	8.17	17.7	31.4	39.3	47.2	58	0.00247	0.00373	0.00539	0.00817	0.0177	0.0314	0.0393	0.0472	0.058	8.66127	8.06661	7.5355	6.93545	5.82011	4.99309	4.66933	4.40507	4.1078	-2.86617	-0.716543	-4.55347	-0.68992	1.40646		25.3	1.706	2.621	1.276	0.54	0.24	0.41	0.66	1.27	1.28	1.8	2.09	2.72
39	TAN2206_SW-64_3-4cm	2024-05-09 12:58:51	3.5	2.47	3.72	5.38	8.16	17.7	31.4	39.3	47.2	58	0.00247	0.00372	0.00538	0.00816	0.0177	0.0314	0.0393	0.0472	0.058	8.66127	8.07048	7.53818	6.93722	5.82011	4.99309	4.66933	4.40507	4.1078	-2.86885	-0.717213	-4.55347	-0.68992	1.40713		25.3	1.686	2.623	1.273	0.55	0.24	0.41	0.66	1.28	1.28	1.8	2.09	2.72
40	TAN2206_SW-64_3-4cm	2024-05-09 12:59:14	3.5	2.47	3.73	5.4	8.2	17.8	31.5	39.4	47.3	58.1	0.00247	0.00373	0.0054	0.0082	0.0178	0.0315	0.0394	0.0473	0.0581	8.66127	8.06661	7.53282	6.93016	5.81198	4.9885	4.66566	4.40202	4.10532	-2.86716	-0.716791	-4.55596	-0.690296	1.40709		25.3	1.69	2.622	1.272	0.54	0.24	0.41	0.66	1.27	1.27	1.79	2.09	2.71
41	TAN2206_SW-64_3-4cm	2024-05-09 12:59:38	3.5	2.47	3.73	5.4	8.19	17.7	31.4	39.4	47.3	58.2	0.00247	0.00373	0.0054	0.00819	0.0177	0.0314	0.0394	0.0473	0.0582	8.66127	8.06661	7.53282	6.93192	5.82011	4.99309	4.66566	4.40202	4.10284	-2.86716	-0.716791	-4.55844	-0.690672	1.40746		25.2	1.748	2.623	1.287	0.54	0.24	0.41	0.66	1.27	1.28	1.79	2.09	2.71
42	TAN2206_SW-64_3-4cm	2024-05-09 13:00:02	3.5	2.47	3.73	5.4	8.2	17.8	31.5	39.4	47.3	58.1	0.00247	0.00373	0.0054	0.0082	0.0178	0.0315	0.0394	0.0473	0.0581	8.66127	8.06661	7.53282	6.93016	5.81198	4.9885	4.66566	4.40202	4.10532	-2.86716	-0.716791	-4.55596	-0.690296	1.40709		25.3	1.691	2.622	1.272	0.54	0.24	0.41	0.66	1.27	1.28	1.79	2.08	2.71
43	TAN2206_SW-64_3-4cm	2024-05-09 13:00:25	3.5	2.47	3.73	5.4	8.19	17.7	31.4	39.3	47.2	57.9	0.00247	0.00373	0.0054	0.00819	0.0177	0.0314	0.0393	0.0472	0.0579	8.66127	8.06661	7.53282	6.93192	5.82011	4.99309	4.66933	4.40507	4.11029	-2.8635	-0.715875	-4.55098	-0.689542	1.40542		25.3	1.686	2.62	1.27	0.54	0.24	0.41	0.66	1.27	1.28	1.79	2.08	2.71
44	Average of 'TAN2206_SW-64_3-4cm'	2024-05-09 12:56:49	3.5	2.47	3.73	5.39	8.18	17.7	31.4	39.3	47.2	58	0.00247	0.00373	0.00539	0.00818	0.0177	0.0314	0.0393	0.0472	0.058	8.66127	8.06661	7.5355	6.93368	5.82011	4.99309	4.66933	4.40507	4.1078	-2.86617	-0.716543	-4.55347	-0.68992	1.40646		25.3	1.691	2.621	1.273	0.54	0.24	0.41	0.66	1.27	1.28	1.8	2.09	2.71
45	TAN2206_SW-64_4-5cm	2024-05-09 13:13:06	4.5	2.54	3.93	5.77	8.94	20.1	36	45	54	66	0.00254	0.00393	0.00577	0.00894	0.0201	0.036	0.045	0.054	0.066	8.62096	7.99125	7.43721	6.80551	5.63666	4.79586	4.47393	4.2109	3.92139	-2.96328	-0.74082	-4.69957	-0.712055	1.45288		29.7	1.531	2.713	1.235	0.59	0.24	0.4	0.62	1.17	1.16	1.64	1.91	2.5
46	TAN2206_SW-64_4-5cm	2024-05-09 13:13:30	4.5	2.54	3.93	5.77	8.95	20.1	36	45	54	65.9	0.00254	0.00393	0.00577	0.00895	0.0201	0.036	0.045	0.054	0.0659	8.62096	7.99125	7.43721	6.8039	5.63666	4.79586	4.47393	4.2109	3.92358	-2.96328	-0.74082	-4.69738	-0.711724	1.45254		29.8	1.473	2.713	1.221	0.59	0.24	0.4	0.62	1.17	1.16	1.64	1.91	2.49
47	TAN2206_SW-64_4-5cm	2024-05-09 13:13:54	4.5	2.54	3.94	5.78	8.96	20.1	36	45	54	66	0.00254	0.00394	0.00578	0.00896	0.0201	0.036	0.045	0.054	0.066	8.62096	7.98759	7.43471	6.80229	5.63666	4.79586	4.47393	4.2109	3.92139	-2.96078	-0.740196	-4.69957	-0.712055	1.45225		29.8	1.486	2.712	1.224	0.59	0.24	0.4	0.62	1.17	1.16	1.63	1.91	2.49
48	TAN2206_SW-64_4-5cm	2024-05-09 13:14:17	4.5	2.54	3.94	5.8	8.98	20.2	36.1	45.2	54.2	66.2	0.00254	0.00394	0.0058	0.00898	0.0202	0.0361	0.0452	0.0542	0.0662	8.62096	7.98759	7.42973	6.79907	5.6295	4.79186	4.46753	4.20556	3.91702	-2.9622	-0.740549	-4.70393	-0.712717	1.45327		29.9	1.482	2.713	1.224	0.59	0.24	0.4	0.62	1.16	1.16	1.63	1.9	2.48
49	TAN2206_SW-64_4-5cm	2024-05-09 13:14:43	4.5	2.54	3.95	5.8	8.99	20.2	36.1	45.1	54	66	0.00254	0.00395	0.0058	0.00899	0.0202	0.0361	0.0451	0.054	0.066	8.62096	7.98393	7.42973	6.79746	5.6295	4.79186	4.47073	4.2109	3.92139	-2.959	-0.739751	-4.69957	-0.712055	1.45181		30	1.462	2.712	1.217	0.6	0.24	0.4	0.62	1.16	1.16	1.63	1.9	2.48
50	TAN2206_SW-64_4-5cm	2024-05-09 13:15:06	4.5	2.55	3.96	5.82	9.02	20.3	36.2	45.2	54.3	66.3	0.00255	0.00396	0.00582	0.00902	0.0203	0.0362	0.0452	0.0543	0.0663	8.61529	7.98028	7.42477	6.79266	5.62238	4.78787	4.46753	4.2029	3.91485	-2.95723	-0.739308	-4.70044	-0.712188	1.4515		29.9	1.481	2.712	1.223	0.59	0.24	0.4	0.61	1.16	1.15	1.62	1.89	2.47
51	TAN2206_SW-64_4-5cm	2024-05-09 13:15:30	4.5	2.54	3.95	5.8	8.99	20.2	36	45	53.8	65.7	0.00254	0.00395	0.0058	0.00899	0.0202	0.036	0.045	0.0538	0.0657	8.62096	7.98393	7.42973	6.79746	5.6295	4.79586	4.47393	4.21625	3.92796	-2.9558	-0.73895	-4.69299	-0.71106	1.45001		29.9	1.411	2.707	1.205	0.59	0.24	0.4	0.62	1.16	1.16	1.63	1.9	2.48
52	TAN2206_SW-64_4-5cm	2024-05-09 13:15:53	4.5	2.54	3.95	5.81	9	20.2	36	45	53.9	65.9	0.00254	0.00395	0.00581	0.009	0.0202	0.036	0.045	0.0539	0.0659	8.62096	7.98393	7.42725	6.79586	5.6295	4.79586	4.47393	4.21357	3.92358	-2.95331	-0.738329	-4.69738	-0.711724	1.45005		29.8	1.449	2.708	1.215	0.59	0.24	0.4	0.62	1.16	1.16	1.63	1.9	2.47
53	TAN2206_SW-64_4-5cm	2024-05-09 13:16:17	4.5	2.54	3.95	5.82	9.02	20.2	36.1	45.1	54	66	0.00254	0.00395	0.00582	0.00902	0.0202	0.0361	0.0451	0.054	0.066	8.62096	7.98393	7.42477	6.79266	5.6295	4.79186	4.47073	4.2109	3.92139	-2.95404	-0.738509	-4.69957	-0.712055	1.45056		29.8	1.472	2.708	1.219	0.59	0.24	0.4	0.62	1.16	1.15	1.62	1.9	2.47
54	TAN2206_SW-64_4-5cm	2024-05-09 13:16:42	4.5	2.54	3.95	5.81	9.01	20.2	36	45	53.9	65.8	0.00254	0.00395	0.00581	0.00901	0.0202	0.036	0.045	0.0539	0.0658	8.62096	7.98393	7.42725	6.79426	5.6295	4.79586	4.47393	4.21357	3.92577	-2.95331	-0.738329	-4.69519	-0.711392	1.44972		29.8	1.419	2.707	1.207	0.59	0.24	0.4	0.62	1.16	1.16	1.63	1.9	2.47
55	Average of 'TAN2206_SW-64_4-5cm'	2024-05-09 13:13:06	4.5	2.54	3.94	5.8	8.99	20.2	36.1	45.1	54	66	0.00254	0.00394	0.0058	0.00899	0.0202	0.0361	0.0451	0.054	0.066	8.62096	7.98759	7.42973	6.79746	5.6295	4.79186	4.47073	4.2109	3.92139	-2.959	-0.739751	-4.69957	-0.712055	1.45181		29.8	1.467	2.71	1.219	0.59	0.24	0.4	0.62	1.16	1.16	1.63	1.9	2.48
56	TAN2206_SW-64_5-6cm	2024-05-09 13:24:08	5.5	2.47	3.77	5.49	8.42	18.8	34.4	43.6	52.7	65.4	0.00247	0.00377	0.00549	0.00842	0.0188	0.0344	0.0436	0.0527	0.0654	8.66127	8.05122	7.50898	6.89196	5.73312	4.86145	4.51953	4.24605	3.93457	-2.98945	-0.747363	-4.72671	-0.716168	1.46353		27.4	1.934	2.721	1.349	0.6	0.25	0.41	0.65	1.24	1.24	1.74	2.03	2.65
57	TAN2206_SW-64_5-6cm	2024-05-09 13:24:32	5.5	2.47	3.76	5.47	8.38	18.8	34.3	43.4	52.5	65.3	0.00247	0.00376	0.00547	0.00838	0.0188	0.0343	0.0434	0.0525	0.0653	8.66127	8.05505	7.51424	6.89883	5.73312	4.86565	4.52616	4.25154	3.93677	-2.98808	-0.747021	-4.7245	-0.715833	1.46285		27.3	1.949	2.72	1.353	0.6	0.25	0.41	0.65	1.24	1.24	1.75	2.04	2.66
58	TAN2206_SW-64_5-6cm	2024-05-09 13:24:56	5.5	2.48	3.78	5.49	8.42	18.9	34.5	43.7	52.8	65.6	0.00248	0.00378	0.00549	0.00842	0.0189	0.0345	0.0437	0.0528	0.0656	8.65544	8.0474	7.50898	6.89196	5.72547	4.85726	4.51622	4.24332	3.93016	-2.99276	-0.748189	-4.72528	-0.715952	1.46414		27.5	1.925	2.721	1.349	0.59	0.25	0.41	0.65	1.24	1.24	1.74	2.03	2.65
59	TAN2206_SW-64_5-6cm	2024-05-09 13:25:19	5.5	2.48	3.77	5.49	8.4	18.8	34.4	43.6	52.8	65.6	0.00248	0.00377	0.00549	0.0084	0.0188	0.0344	0.0436	0.0528	0.0656	8.65544	8.05122	7.50898	6.89539	5.73312	4.86145	4.51953	4.24332	3.93016	-2.98945	-0.747363	-4.72528	-0.715952	1.46331		27.3	1.959	2.721	1.358	0.59	0.25	0.41	0.65	1.24	1.24	1.74	2.04	2.65
60	TAN2206_SW-64_5-6cm	2024-05-09 13:25:43	5.5	2.48	3.78	5.5	8.43	18.8	34.4	43.5	52.6	65.4	0.00248	0.00378	0.0055	0.00843	0.0188	0.0344	0.0435	0.0526	0.0654	8.65544	8.0474	7.50635	6.89025	5.73312	4.86145	4.52284	4.24879	3.93457	-2.98351	-0.745878	-4.72088	-0.715285	1.46116		27.4	1.939	2.717	1.35	0.59	0.25	0.41	0.65	1.23	1.24	1.74	2.03	2.64
61	TAN2206_SW-64_5-6cm	2024-05-09 13:26:06	5.5	2.48	3.79	5.51	8.45	18.9	34.4	43.5	52.6	65.3	0.00248	0.00379	0.00551	0.00845	0.0189	0.0344	0.0435	0.0526	0.0653	8.65544	8.04359	7.50373	6.88683	5.72547	4.86145	4.52284	4.24879	3.93677	-2.98089	-0.745223	-4.71867	-0.71495	1.46017		27.4	1.929	2.716	1.347	0.59	0.25	0.41	0.65	1.23	1.23	1.74	2.02	2.63
62	TAN2206_SW-64_5-6cm	2024-05-09 13:26:31	5.5	2.48	3.79	5.52	8.45	18.9	34.4	43.6	52.6	65.3	0.00248	0.00379	0.00552	0.00845	0.0189	0.0344	0.0436	0.0526	0.0653	8.65544	8.04359	7.50112	6.88683	5.72547	4.86145	4.51953	4.24879	3.93677	-2.98159	-0.745397	-4.71867	-0.71495	1.46035		27.5	1.889	2.716	1.338	0.59	0.25	0.41	0.65	1.23	1.23	1.73	2.02	2.63
63	TAN2206_SW-64_5-6cm	2024-05-09 13:26:55	5.5	2.48	3.79	5.52	8.46	18.9	34.4	43.6	52.7	65.4	0.00248	0.00379	0.00552	0.00846	0.0189	0.0344	0.0436	0.0527	0.0654	8.65544	8.04359	7.50112	6.88513	5.72547	4.86145	4.51953	4.24605	3.93457	-2.98159	-0.745397	-4.72088	-0.715285	1.46068		27.4	1.923	2.716	1.346	0.59	0.25	0.41	0.64	1.23	1.23	1.73	2.02	2.63
64	TAN2206_SW-64_5-6cm	2024-05-09 13:27:18	5.5	2.48	3.8	5.53	8.49	18.9	34.5	43.7	52.8	65.5	0.00248	0.0038	0.00553	0.00849	0.0189	0.0345	0.0437	0.0528	0.0655	8.65544	8.03978	7.4985	6.88002	5.72547	4.85726	4.51622	4.24332	3.93236	-2.98228	-0.74557	-4.72308	-0.715619	1.46119		27.5	1.901	2.716	1.341	0.59	0.25	0.41	0.64	1.23	1.23	1.73	2.01	2.62
65	TAN2206_SW-64_5-6cm	2024-05-09 13:27:42	5.5	2.49	3.8	5.53	8.49	18.9	34.5	43.7	52.9	65.7	0.00249	0.0038	0.00553	0.00849	0.0189	0.0345	0.0437	0.0529	0.0657	8.64964	8.03978	7.4985	6.88002	5.72547	4.85726	4.51622	4.24059	3.92796	-2.98228	-0.74557	-4.72168	-0.715405	1.46098		27.4	1.975	2.718	1.358	0.59	0.25	0.41	0.64	1.23	1.23	1.73	2.01	2.62
66	Average of 'TAN2206_SW-64_5-6cm'	2024-05-09 13:24:08	5.5	2.48	3.78	5.5	8.44	18.9	34.4	43.6	52.7	65.4	0.00248	0.00378	0.0055	0.00844	0.0189	0.0344	0.0436	0.0527	0.0654	8.65544	8.0474	7.50635	6.88854	5.72547	4.86145	4.51953	4.24605	3.93457	-2.98682	-0.746706	-4.72088	-0.715285	1.46199		27.4	1.933	2.718	1.349	0.59	0.25	0.41	0.65	1.23	1.23	1.74	2.03	2.64
67	TAN2206_SW-64_6-7cm	2024-05-09 13:52:16	6.5	2.48	3.78	5.48	8.35	18.2	33.2	42.2	51.2	64.2	0.00248	0.00378	0.00548	0.00835	0.0182	0.0332	0.0422	0.0512	0.0642	8.65544	8.0474	7.51161	6.90401	5.77992	4.91267	4.56661	4.28771	3.96128	-2.945	-0.736249	-4.69416	-0.711237	1.44749		25.5	2.285	2.693	1.427	0.6	0.25	0.41	0.65	1.24	1.24	1.74	2.03	2.65
68	TAN2206_SW-64_6-7cm	2024-05-09 13:52:39	6.5	2.48	3.78	5.49	8.35	18.3	33.2	42.1	51.1	63.9	0.00248	0.00378	0.00549	0.00835	0.0183	0.0332	0.0421	0.0511	0.0639	8.65544	8.0474	7.50898	6.90401	5.77201	4.91267	4.57004	4.29053	3.96804	-2.93894	-0.734736	-4.6874	-0.710213	1.44495		25.7	2.215	2.689	1.408	0.59	0.25	0.41	0.65	1.23	1.23	1.74	2.03	2.65
69	TAN2206_SW-64_6-7cm	2024-05-09 13:53:03	6.5	2.49	3.79	5.5	8.38	18.3	33.3	42.3	51.3	64.3	0.00249	0.00379	0.0055	0.00838	0.0183	0.0333	0.0423	0.0513	0.0643	8.64964	8.04359	7.50635	6.89883	5.77201	4.90833	4.5632	4.2849	3.95904	-2.94315	-0.735789	-4.6906	-0.710697	1.44649		25.7	2.273	2.692	1.423	0.59	0.25	0.41	0.64	1.23	1.23	1.73	2.02	2.64
70	TAN2206_SW-64_6-7cm	2024-05-09 13:53:26	6.5	2.49	3.79	5.51	8.39	18.3	33.3	42.3	51.4	64.4	0.00249	0.00379	0.00551	0.00839	0.0183	0.0333	0.0423	0.0514	0.0644	8.64964	8.04359	7.50373	6.89711	5.77201	4.90833	4.5632	4.28209	3.9568	-2.94053	-0.735133	-4.69284	-0.711037	1.44617		25.7	2.245	2.691	1.418	0.59	0.24	0.41	0.64	1.23	1.23	1.73	2.02	2.63
71	TAN2206_SW-64_6-7cm	2024-05-09 13:53:52	6.5	2.49	3.79	5.51	8.4	18.3	33.3	42.3	51.4	64.5	0.00249	0.00379	0.00551	0.0084	0.0183	0.0333	0.0423	0.0514	0.0645	8.64964	8.04359	7.50373	6.89539	5.77201	4.90833	4.5632	4.28209	3.95456	-2.94053	-0.735133	-4.69508	-0.711376	1.44651		25.6	2.269	2.692	1.423	0.59	0.25	0.41	0.64	1.23	1.23	1.73	2.02	2.63
72	TAN2206_SW-64_6-7cm	2024-05-09 13:54:15	6.5	2.49	3.8	5.53	8.41	18.4	33.4	42.5	51.6	64.8	0.00249	0.0038	0.00553	0.00841	0.0184	0.0334	0.0425	0.0516	0.0648	8.64964	8.03978	7.4985	6.89368	5.76415	4.90401	4.55639	4.27649	3.94786	-2.94211	-0.735528	-4.70178	-0.71239	1.44792		25.7	2.637	2.695	1.479	0.59	0.24	0.41	0.64	1.23	1.23	1.73	2.01	2.62
73	TAN2206_SW-64_6-7cm	2024-05-09 13:54:39	6.5	2.49	3.8	5.53	8.42	18.4	33.4	42.5	51.6	64.7	0.00249	0.0038	0.00553	0.00842	0.0184	0.0334	0.0425	0.0516	0.0647	8.64964	8.03978	7.4985	6.89196	5.76415	4.90401	4.55639	4.27649	3.95009	-2.94211	-0.735528	-4.69955	-0.712053	1.44758		25.7	2.654	2.694	1.482	0.58	0.24	0.41	0.64	1.23	1.23	1.72	2.01	2.62
74	TAN2206_SW-64_6-7cm	2024-05-09 13:55:02	6.5	2.49	3.8	5.53	8.43	18.4	33.4	42.4	51.4	64.4	0.00249	0.0038	0.00553	0.00843	0.0184	0.0334	0.0424	0.0514	0.0644	8.64964	8.03978	7.4985	6.89025	5.76415	4.90401	4.55979	4.28209	3.9568	-2.93871	-0.734678	-4.69284	-0.711037	1.44572		25.7	2.273	2.69	1.422	0.59	0.24	0.41	0.64	1.23	1.23	1.72	2.01	2.62
75	TAN2206_SW-64_6-7cm	2024-05-09 13:55:27	6.5	2.5	3.82	5.56	8.48	18.5	33.6	42.7	51.8	65.1	0.0025	0.00382	0.00556	0.00848	0.0185	0.0336	0.0427	0.0518	0.0651	8.64386	8.03221	7.4907	6.88172	5.75633	4.89539	4.54962	4.2709	3.9412	-2.94108	-0.73527	-4.70266	-0.712524	1.44779		25.8	2.623	2.697	1.477	0.58	0.24	0.41	0.64	1.22	1.22	1.71	2	2.6
76	TAN2206_SW-64_6-7cm	2024-05-09 13:55:50	6.5	2.49	3.82	5.55	8.47	18.5	33.5	42.5	51.5	64.5	0.00249	0.00382	0.00555	0.00847	0.0185	0.0335	0.0425	0.0515	0.0645	8.64964	8.03221	7.4933	6.88342	5.75633	4.8997	4.55639	4.27928	3.95456	-2.9369	-0.734226	-4.69508	-0.711376	1.4456		25.9	2.188	2.69	1.403	0.59	0.24	0.41	0.64	1.22	1.22	1.72	2	2.61
77	Average of 'TAN2206_SW-64_6-7cm'	2024-05-09 13:52:16	6.5	2.49	3.8	5.52	8.41	18.4	33.4	42.4	51.4	64.5	0.00249	0.0038	0.00552	0.00841	0.0184	0.0334	0.0424	0.0514	0.0645	8.64964	8.03978	7.50112	6.89368	5.76415	4.90401	4.55979	4.28209	3.95456	-2.94132	-0.735331	-4.69508	-0.711376	1.44671		25.7	2.374	2.692	1.437	0.59	0.25	0.41	0.64	1.23	1.23	1.73	2.02	2.63
78	TAN2206_SW-64_7-8cm	2024-05-09 14:02:53	7.5	2.54	3.89	5.66	8.63	18.9	35	45	55.5	70.5	0.00254	0.00389	0.00566	0.00863	0.0189	0.035	0.045	0.0555	0.0705	8.62096	8.00601	7.46498	6.85642	5.72547	4.8365	4.47393	4.17137	3.82623	-2.99105	-0.747763	-4.79472	-0.726473	1.47424		25.7	2.803	2.736	1.552	0.53	0.23	0.38	0.61	1.19	1.2	1.69	1.97	2.57
79	TAN2206_SW-64_7-8cm	2024-05-09 14:03:18	7.5	2.55	3.89	5.65	8.61	18.9	34.9	45	55.6	71	0.00255	0.00389	0.00565	0.00861	0.0189	0.0349	0.045	0.0556	0.071	8.61529	8.00601	7.46753	6.85977	5.72547	4.84063	4.47393	4.16877	3.81604	-2.9936	-0.748401	-4.79925	-0.727159	1.47556		25.6	3.613	2.741	1.678	0.51	0.22	0.38	0.61	1.19	1.2	1.69	1.97	2.57
80	TAN2206_SW-64_7-8cm	2024-05-09 14:03:41	7.5	2.55	3.9	5.66	8.61	18.9	35	45.1	55.7	71	0.00255	0.0039	0.00566	0.00861	0.0189	0.035	0.0451	0.0557	0.071	8.61529	8.00231	7.46498	6.85977	5.72547	4.8365	4.47073	4.16618	3.81604	-2.99425	-0.748563	-4.79925	-0.727159	1.47572		25.6	3.417	2.741	1.649	0.51	0.22	0.38	0.61	1.19	1.2	1.69	1.97	2.57
81	TAN2206_SW-64_7-8cm	2024-05-09 14:04:05	7.5	2.55	3.9	5.66	8.6	18.9	34.9	45	55.5	70.4	0.00255	0.0039	0.00566	0.0086	0.0189	0.0349	0.045	0.0555	0.0704	8.61529	8.00231	7.46498	6.86145	5.72547	4.84063	4.47393	4.17137	3.82828	-2.99105	-0.747763	-4.78701	-0.725304	1.47307		25.6	2.758	2.734	1.545	0.52	0.22	0.38	0.61	1.19	1.2	1.69	1.97	2.57
82	TAN2206_SW-64_7-8cm	2024-05-09 14:04:28	7.5	2.55	3.91	5.68	8.64	19	35.1	45.1	55.6	70.8	0.00255	0.00391	0.00568	0.00864	0.019	0.0351	0.0451	0.0556	0.0708	8.61529	7.99862	7.45989	6.85475	5.71786	4.83239	4.47073	4.16877	3.82011	-2.98916	-0.747291	-4.79518	-0.726542	1.47383		25.9	3.41	2.739	1.641	0.51	0.22	0.38	0.61	1.18	1.19	1.68	1.96	2.56
83	TAN2206_SW-64_7-8cm	2024-05-09 14:04:54	7.5	2.55	3.91	5.68	8.64	18.9	35	45	55.5	70.8	0.00255	0.00391	0.00568	0.00864	0.0189	0.035	0.045	0.0555	0.0708	8.61529	7.99862	7.45989	6.85475	5.72547	4.8365	4.47393	4.17137	3.82011	-2.98596	-0.746491	-4.79518	-0.726542	1.47303		25.7	3.392	2.737	1.641	0.51	0.22	0.38	0.61	1.19	1.2	1.68	1.96	2.56
84	TAN2206_SW-64_7-8cm	2024-05-09 14:05:17	7.5	2.55	3.91	5.68	8.65	18.9	35	45.1	55.5	70.4	0.00255	0.00391	0.00568	0.00865	0.0189	0.035	0.0451	0.0555	0.0704	8.61529	7.99862	7.45989	6.85308	5.72547	4.8365	4.47073	4.17137	3.82828	-2.98916	-0.747291	-4.78701	-0.725304	1.4726		25.8	2.731	2.733	1.537	0.52	0.22	0.38	0.61	1.18	1.19	1.68	1.96	2.55
85	TAN2206_SW-64_7-8cm	2024-05-09 14:05:41	7.5	2.55	3.92	5.69	8.67	19	35.1	45.2	55.9	71.3	0.00255	0.00392	0.00569	0.00867	0.019	0.0351	0.0452	0.0559	0.0713	8.61529	7.99493	7.45736	6.84975	5.71786	4.83239	4.46753	4.16101	3.80995	-2.98982	-0.747456	-4.80533	-0.728081	1.47554		25.6	3.373	2.741	1.642	0.51	0.22	0.38	0.61	1.18	1.19	1.68	1.95	2.55
86	TAN2206_SW-64_7-8cm	2024-05-09 14:06:06	7.5	2.55	3.92	5.69	8.67	19	35	44.9	55.4	70.2	0.00255	0.00392	0.00569	0.00867	0.019	0.035	0.0449	0.0554	0.0702	8.61529	7.99493	7.45736	6.84975	5.71786	4.8365	4.47714	4.17397	3.83239	-2.98021	-0.745054	-4.7829	-0.724682	1.46974		25.8	2.792	2.729	1.546	0.51	0.22	0.38	0.61	1.19	1.19	1.68	1.95	2.55
87	TAN2206_SW-64_7-8cm	2024-05-09 14:06:31	7.5	2.56	3.92	5.71	8.69	19	35.1	45.1	55.7	70.7	0.00256	0.00392	0.00571	0.00869	0.019	0.0351	0.0451	0.0557	0.0707	8.60964	7.99493	7.45229	6.84643	5.71786	4.83239	4.47073	4.16618	3.82215	-2.98156	-0.745391	-4.78749	-0.725378	1.47077		25.8	2.845	2.733	1.559	0.51	0.22	0.38	0.61	1.18	1.19	1.67	1.95	2.54
88	Average of 'TAN2206_SW-64_7-8cm'	2024-05-09 14:02:53	7.5	2.55	3.91	5.68	8.64	18.9	35	45.1	55.6	70.7	0.00255	0.00391	0.00568	0.00864	0.0189	0.035	0.0451	0.0556	0.0707	8.61529	7.99862	7.45989	6.85475	5.72547	4.8365	4.47073	4.16877	3.82215	-2.98916	-0.747291	-4.79314	-0.726233	1.47352		25.7	3.129	2.736	1.601	0.52	0.22	0.38	0.61	1.19	1.19	1.68	1.96	2.56
89	TAN2206_SW-64_8-9cm	2024-05-09 14:14:02	8.5	2.62	4.09	6.02	9.35	21.9	41.5	53.1	64.6	80.6	0.00262	0.00409	0.00602	0.00935	0.0219	0.0415	0.0531	0.0646	0.0806	8.57622	7.93368	7.37602	6.74082	5.51293	4.59074	4.23514	3.95232	3.63308	-3.14088	-0.785219	-4.94314	-0.748961	1.53418		33.5	2.016	2.852	1.382	0.54	0.22	0.37	0.58	1.11	1.11	1.56	1.82	2.38
90	TAN2206_SW-64_8-9cm	2024-05-09 14:14:25	8.5	2.62	4.1	6.03	9.38	21.9	41.6	53.2	64.7	80.5	0.00262	0.0041	0.00603	0.00938	0.0219	0.0416	0.0532	0.0647	0.0805	8.57622	7.93016	7.37363	6.7362	5.51293	4.58727	4.23243	3.95009	3.63487	-3.1412	-0.785299	-4.94135	-0.748689	1.53399		33.7	1.937	2.851	1.365	0.53	0.22	0.37	0.58	1.11	1.11	1.56	1.82	2.38
91	TAN2206_SW-64_8-9cm	2024-05-09 14:14:49	8.5	2.62	4.09	6.02	9.35	21.9	41.5	53.1	64.5	80.4	0.00262	0.00409	0.00602	0.00935	0.0219	0.0415	0.0531	0.0645	0.0804	8.57622	7.93368	7.37602	6.74082	5.51293	4.59074	4.23514	3.95456	3.63666	-3.14088	-0.785219	-4.93956	-0.748418	1.53364		33.7	1.966	2.852	1.371	0.54	0.22	0.37	0.58	1.11	1.11	1.56	1.83	2.39
92	TAN2206_SW-64_8-9cm	2024-05-09 14:15:12	8.5	2.62	4.1	6.04	9.39	22	41.6	53.1	64.6	80.5	0.00262	0.0041	0.00604	0.00939	0.022	0.0416	0.0531	0.0646	0.0805	8.57622	7.93016	7.37124	6.73466	5.50635	4.58727	4.23514	3.95232	3.63487	-3.13609	-0.784023	-4.94135	-0.748689	1.53271		33.7	2.003	2.851	1.376	0.54	0.22	0.37	0.58	1.11	1.11	1.56	1.82	2.38
93	TAN2206_SW-64_8-9cm	2024-05-09 14:15:37	8.5	2.62	4.1	6.04	9.4	21.9	41.6	53.1	64.5	80.3	0.00262	0.0041	0.00604	0.0094	0.0219	0.0416	0.0531	0.0645	0.0803	8.57622	7.93016	7.37124	6.73312	5.51293	4.58727	4.23514	3.95456	3.63846	-3.13609	-0.784023	-4.93776	-0.748146	1.53217		33.6	1.918	2.848	1.36	0.54	0.22	0.37	0.58	1.11	1.11	1.56	1.82	2.37
94	TAN2206_SW-64_8-9cm	2024-05-09 14:16:00	8.5	2.62	4.1	6.05	9.41	22	41.5	53.1	64.5	80.3	0.00262	0.0041	0.00605	0.00941	0.022	0.0415	0.0531	0.0645	0.0803	8.57622	7.93016	7.36885	6.73159	5.50635	4.59074	4.23514	3.95456	3.63846	-3.1337	-0.783426	-4.93776	-0.748146	1.53157		33.6	1.949	2.847	1.366	0.53	0.22	0.37	0.58	1.11	1.11	1.55	1.82	2.37
95	TAN2206_SW-64_8-9cm	2024-05-09 14:16:24	8.5	2.62	4.1	6.04	9.4	21.9	41.5	53	64.5	80.2	0.00262	0.0041	0.00604	0.0094	0.0219	0.0415	0.053	0.0645	0.0802	8.57622	7.93016	7.37124	6.73312	5.51293	4.59074	4.23786	3.95456	3.64025	-3.13337	-0.783343	-4.93596	-0.747873	1.53122		33.6	1.93	2.847	1.362	0.53	0.22	0.37	0.58	1.11	1.11	1.56	1.82	2.37
96	TAN2206_SW-64_8-9cm	2024-05-09 14:16:49	8.5	2.62	4.1	6.05	9.42	22	41.6	53.1	64.6	80.5	0.00262	0.0041	0.00605	0.00942	0.022	0.0416	0.0531	0.0646	0.0805	8.57622	7.93016	7.36885	6.73006	5.50635	4.58727	4.23514	3.95232	3.63487	-3.1337	-0.783426	-4.94135	-0.748689	1.53212		33.6	1.992	2.849	1.375	0.54	0.22	0.37	0.58	1.11	1.1	1.55	1.81	2.37
97	TAN2206_SW-64_8-9cm	2024-05-09 14:17:13	8.5	2.62	4.1	6.04	9.39	21.9	41.4	52.7	63.9	79.1	0.00262	0.0041	0.00604	0.00939	0.0219	0.0414	0.0527	0.0639	0.0791	8.57622	7.93016	7.37124	6.73466	5.51293	4.59423	4.24605	3.96804	3.66018	-3.12518	-0.781296	-4.91604	-0.744854	1.52615		33.7	1.553	2.837	1.29	0.54	0.22	0.37	0.58	1.11	1.11	1.56	1.82	2.37
98	TAN2206_SW-64_8-9cm	2024-05-09 14:17:38	8.5	2.62	4.1	6.05	9.41	22	41.6	53.1	64.6	80.4	0.00262	0.0041	0.00605	0.00941	0.022	0.0416	0.0531	0.0646	0.0804	8.57622	7.93016	7.36885	6.73159	5.50635	4.58727	4.23514	3.95232	3.63666	-3.1337	-0.783426	-4.93956	-0.748418	1.53184		33.7	1.944	2.849	1.365	0.54	0.22	0.37	0.58	1.11	1.1	1.55	1.81	2.37
99	Average of 'TAN2206_SW-64_8-9cm'	2024-05-09 14:14:02	8.5	2.62	4.1	6.04	9.39	21.9	41.5	53.1	64.5	80.3	0.00262	0.0041	0.00604	0.00939	0.0219	0.0415	0.0531	0.0645	0.0803	8.57622	7.93016	7.37124	6.73466	5.51293	4.59074	4.23514	3.95456	3.63846	-3.13609	-0.784023	-4.93776	-0.748146	1.53217		33.6	1.926	2.848	1.362	0.54	0.22	0.37	0.58	1.11	1.11	1.56	1.82	2.37
100	TAN2206_SW-64_9-10cm	2024-05-09 14:25:16	9.5	2.44	3.77	5.54	8.61	20	38.2	49.4	60.8	76.7	0.00244	0.00377	0.00554	0.00861	0.02	0.0382	0.0494	0.0608	0.0767	8.6789	8.05122	7.4959	6.85977	5.64386	4.71028	4.33935	4.03978	3.70463	-3.15655	-0.789138	-4.97427	-0.753678	1.54282		29.1	2.625	2.876	1.518	0.77	0.27	0.43	0.66	1.22	1.21	1.7	1.98	2.58
101	TAN2206_SW-64_9-10cm	2024-05-09 14:25:39	9.5	2.44	3.77	5.54	8.61	19.9	38.2	49.5	60.8	76.4	0.00244	0.00377	0.00554	0.00861	0.0199	0.0382	0.0495	0.0608	0.0764	8.6789	8.05122	7.4959	6.85977	5.65109	4.71028	4.33643	4.03978	3.71028	-3.15947	-0.789868	-4.96862	-0.752821	1.54269		29.1	2.422	2.873	1.482	0.76	0.27	0.43	0.66	1.22	1.21	1.7	1.98	2.58
102	TAN2206_SW-64_9-10cm	2024-05-09 14:26:03	9.5	2.45	3.78	5.57	8.65	20.1	38.4	49.5	60.7	76	0.00245	0.00378	0.00557	0.00865	0.0201	0.0384	0.0495	0.0607	0.076	8.673	8.0474	7.48811	6.85308	5.63666	4.70275	4.33643	4.04216	3.71786	-3.15168	-0.78792	-4.95515	-0.75078	1.5387		29.4	2.078	2.867	1.422	0.75	0.27	0.43	0.65	1.21	1.2	1.69	1.97	2.57
103	TAN2206_SW-64_9-10cm	2024-05-09 14:26:28	9.5	2.45	3.79	5.58	8.68	20.1	38.5	49.7	61.2	77.2	0.00245	0.00379	0.00558	0.00868	0.0201	0.0385	0.0497	0.0612	0.0772	8.673	8.04359	7.48552	6.84809	5.63666	4.699	4.33061	4.03032	3.69526	-3.15491	-0.788727	-4.97775	-0.754204	1.54293		29.3	2.62	2.874	1.517	0.75	0.26	0.43	0.65	1.21	1.2	1.68	1.97	2.56
104	TAN2206_SW-64_9-10cm	2024-05-09 14:26:53	9.5	2.45	3.79	5.58	8.68	20.1	38.4	49.7	61.2	77.2	0.00245	0.00379	0.00558	0.00868	0.0201	0.0384	0.0497	0.0612	0.0772	8.673	8.04359	7.48552	6.84809	5.63666	4.70275	4.33061	4.03032	3.69526	-3.15491	-0.788727	-4.97775	-0.754204	1.54293		29.2	2.645	2.874	1.522	0.75	0.27	0.43	0.65	1.21	1.2	1.68	1.97	2.56
105	TAN2206_SW-64_9-10cm	2024-05-09 14:27:17	9.5	2.45	3.79	5.58	8.68	20.1	38.3	49.6	61	76.8	0.00245	0.00379	0.00558	0.00868	0.0201	0.0383	0.0496	0.061	0.0768	8.673	8.04359	7.48552	6.84809	5.63666	4.70651	4.33352	4.03505	3.70275	-3.152	-0.788001	-4.97025	-0.753069	1.54107		29.2	2.613	2.871	1.514	0.76	0.27	0.43	0.65	1.21	1.2	1.68	1.97	2.56
106	TAN2206_SW-64_9-10cm	2024-05-09 14:27:40	9.5	2.46	3.81	5.61	8.74	20.2	38.6	49.8	61.3	77.3	0.00246	0.00381	0.00561	0.00874	0.0202	0.0386	0.0498	0.0613	0.0773	8.66713	8.03599	7.47778	6.83815	5.6295	4.69526	4.32771	4.02797	3.69339	-3.15007	-0.787518	-4.97374	-0.753597	1.54111		29.3	2.642	2.873	1.52	0.75	0.26	0.43	0.65	1.2	1.19	1.67	1.95	2.54
107	TAN2206_SW-64_9-10cm	2024-05-09 14:28:04	9.5	2.45	3.8	5.6	8.71	20.1	38.4	49.6	61	76.9	0.00245	0.0038	0.0056	0.00871	0.0201	0.0384	0.0496	0.061	0.0769	8.673	8.03978	7.48036	6.84311	5.63666	4.70275	4.33352	4.03505	3.70087	-3.14684	-0.78671	-4.97213	-0.753353	1.54006		29.1	2.612	2.87	1.515	0.75	0.27	0.43	0.65	1.21	1.19	1.68	1.96	2.55
108	TAN2206_SW-64_9-10cm	2024-05-09 14:28:29	9.5	2.45	3.8	5.61	8.73	20.2	38.4	49.7	61.1	77.2	0.00245	0.0038	0.00561	0.00873	0.0202	0.0384	0.0497	0.0611	0.0772	8.673	8.03978	7.47778	6.8398	5.6295	4.70275	4.33061	4.03268	3.69526	-3.14717	-0.786793	-4.97775	-0.754204	1.541		29.2	2.73	2.872	1.536	0.75	0.27	0.43	0.65	1.2	1.19	1.67	1.96	2.54
109	TAN2206_SW-64_9-10cm	2024-05-09 14:28:53	9.5	2.45	3.8	5.6	8.71	20.1	38.3	49.5	60.9	76.7	0.00245	0.0038	0.0056	0.00871	0.0201	0.0383	0.0495	0.0609	0.0767	8.673	8.03978	7.48036	6.84311	5.63666	4.70651	4.33643	4.03741	3.70463	-3.14393	-0.785982	-4.96837	-0.752784	1.53877		29.1	2.626	2.869	1.515	0.76	0.27	0.43	0.65	1.21	1.19	1.68	1.96	2.55
110	Average of 'TAN2206_SW-64_9-10cm'	2024-05-09 14:25:16	9.5	2.45	3.79	5.58	8.68	20.1	38.4	49.6	61	76.8	0.00245	0.00379	0.00558	0.00868	0.0201	0.0384	0.0496	0.061	0.0768	8.673	8.04359	7.48552	6.84809	5.63666	4.70275	4.33352	4.03505	3.70275	-3.152	-0.788001	-4.97025	-0.753069	1.54107		29.2	2.568	2.872	1.507	0.76	0.27	0.43	0.65	1.21	1.2	1.68	1.97	2.56
111	TAN2206_SW-64_10-11cm	2024-05-09 14:37:26	10.5	2.45	3.7	5.32	8.06	17.8	32.9	42.4	52.3	67.2	0.00245	0.0037	0.00532	0.00806	0.0178	0.0329	0.0424	0.0523	0.0672	8.673	8.07826	7.55436	6.955	5.81198	4.92577	4.55979	4.25705	3.89539	-2.99457	-0.748642	-4.77761	-0.72388	1.47252		24.5	4.287	2.739	1.784	0.59	0.24	0.41	0.66	1.27	1.28	1.81	2.12	2.76
112	TAN2206_SW-64_10-11cm	2024-05-09 14:37:50	10.5	2.45	3.68	5.3	8	17.6	32.7	42.2	51.9	66.4	0.00245	0.00368	0.0053	0.008	0.0176	0.0327	0.0422	0.0519	0.0664	8.673	8.08608	7.55979	6.96578	5.82828	4.93457	4.56661	4.26812	3.91267	-2.99318	-0.748295	-4.76033	-0.721262	1.46956		24.4	3.389	2.731	1.655	0.59	0.25	0.41	0.66	1.28	1.29	1.82	2.13	2.78
113	TAN2206_SW-64_10-11cm	2024-05-09 14:38:14	10.5	2.45	3.69	5.32	8.04	17.8	32.9	42.4	52.4	67.3	0.00245	0.00369	0.00532	0.00804	0.0178	0.0329	0.0424	0.0524	0.0673	8.673	8.08216	7.55436	6.95859	5.81198	4.92577	4.55979	4.25429	3.89325	-2.99457	-0.748642	-4.77975	-0.724205	1.47285		24.5	5.456	2.743	1.926	0.59	0.24	0.41	0.66	1.27	1.28	1.81	2.12	2.77
114	TAN2206_SW-64_10-11cm	2024-05-09 14:38:39	10.5	2.45	3.68	5.31	8.02	17.7	32.8	42.2	52	66.4	0.00245	0.00368	0.00531	0.00802	0.0177	0.0328	0.0422	0.052	0.0664	8.673	8.08608	7.55707	6.96218	5.82011	4.93016	4.56661	4.26534	3.91267	-2.99046	-0.747615	-4.76033	-0.721262	1.46888		24.4	3.359	2.73	1.649	0.58	0.25	0.41	0.66	1.28	1.29	1.82	2.12	2.77
115	TAN2206_SW-64_10-11cm	2024-05-09 14:39:02	10.5	2.45	3.69	5.32	8.04	17.7	32.9	42.4	52.2	66.8	0.00245	0.00369	0.00532	0.00804	0.0177	0.0329	0.0424	0.0522	0.0668	8.673	8.08216	7.55436	6.95859	5.82011	4.92577	4.55979	4.25981	3.90401	-2.99457	-0.748642	-4.76899	-0.722575	1.47122		24.5	3.914	2.735	1.725	0.58	0.25	0.41	0.66	1.28	1.28	1.81	2.12	2.76
116	TAN2206_SW-64_10-11cm	2024-05-09 14:39:26	10.5	2.45	3.7	5.33	8.06	17.8	33	42.5	52.5	67.5	0.00245	0.0037	0.00533	0.00806	0.0178	0.033	0.0425	0.0525	0.0675	8.673	8.07826	7.55165	6.955	5.81198	4.92139	4.55639	4.25154	3.88897	-2.99526	-0.748814	-4.78403	-0.724854	1.47367		24.5	5.297	2.744	1.906	0.58	0.25	0.41	0.66	1.27	1.28	1.81	2.11	2.76
117	TAN2206_SW-64_10-11cm	2024-05-09 14:39:50	10.5	2.45	3.7	5.33	8.06	17.8	32.9	42.4	52.3	67	0.00245	0.0037	0.00533	0.00806	0.0178	0.0329	0.0424	0.0523	0.067	8.673	8.07826	7.55165	6.955	5.81198	4.92577	4.55979	4.25705	3.8997	-2.99186	-0.747964	-4.77331	-0.723228	1.47119		24.5	4.017	2.736	1.743	0.58	0.24	0.41	0.66	1.28	1.28	1.81	2.11	2.76
118	TAN2206_SW-64_10-11cm	2024-05-09 14:40:16	10.5	2.45	3.7	5.33	8.07	17.8	33	42.6	52.6	67.5	0.00245	0.0037	0.00533	0.00807	0.0178	0.033	0.0426	0.0526	0.0675	8.673	8.07826	7.55165	6.95322	5.81198	4.92139	4.553	4.24879	3.88897	-2.99865	-0.749661	-4.78403	-0.724854	1.47452		24.6	4.274	2.742	1.784	0.59	0.25	0.41	0.66	1.27	1.28	1.81	2.11	2.75
119	TAN2206_SW-64_10-11cm	2024-05-09 14:40:39	10.5	2.45	3.7	5.33	8.06	17.8	32.9	42.4	52.1	66.5	0.00245	0.0037	0.00533	0.00806	0.0178	0.0329	0.0424	0.0521	0.0665	8.673	8.07826	7.55165	6.955	5.81198	4.92577	4.55979	4.26257	3.9105	-2.99186	-0.747964	-4.7625	-0.721591	1.46956		24.6	3.28	2.73	1.632	0.59	0.25	0.41	0.66	1.28	1.28	1.81	2.11	2.76
120	TAN2206_SW-64_10-11cm	2024-05-09 14:41:06	10.5	2.45	3.69	5.33	8.07	17.8	32.9	42.3	52.1	66.6	0.00245	0.00369	0.00533	0.00807	0.0178	0.0329	0.0423	0.0521	0.0666	8.673	8.08216	7.55165	6.95322	5.81198	4.92577	4.5632	4.26257	3.90833	-2.98845	-0.747113	-4.76467	-0.721919	1.46903		24.6	3.982	2.733	1.731	0.59	0.24	0.41	0.66	1.28	1.28	1.81	2.11	2.76
121	Average of 'TAN2206_SW-64_10-11cm'	2024-05-09 14:37:26	10.5	2.45	3.69	5.32	8.05	17.8	32.9	42.4	52.2	66.9	0.00245	0.00369	0.00532	0.00805	0.0178	0.0329	0.0424	0.0522	0.0669	8.673	8.08216	7.55436	6.9568	5.81198	4.92577	4.55979	4.25981	3.90185	-2.99457	-0.748642	-4.77115	-0.722902	1.47154		24.5	4.182	2.736	1.759	0.59	0.24	0.41	0.66	1.28	1.28	1.81	2.12	2.76
122	TAN2206_SW-64_11-12cm	2024-05-09 14:49:32	11.5	2.37	3.57	5.14	7.83	17.6	32.8	42.4	52.4	67.7	0.00237	0.00357	0.00514	0.00783	0.0176	0.0328	0.0424	0.0524	0.0677	8.7209	8.12986	7.60402	6.99677	5.82828	4.93016	4.55979	4.25429	3.8847	-3.04422	-0.761056	-4.8362	-0.732757	1.49381		24.8	7.461	2.791	2.162	0.75	0.27	0.44	0.69	1.31	1.32	1.86	2.19	2.85
123	TAN2206_SW-64_11-12cm	2024-05-09 14:49:58	11.5	2.37	3.57	5.14	7.82	17.6	32.9	42.4	52.4	67.5	0.00237	0.00357	0.00514	0.00782	0.0176	0.0329	0.0424	0.0524	0.0675	8.7209	8.12986	7.60402	6.99862	5.82828	4.92577	4.55979	4.25429	3.88897	-3.04422	-0.761056	-4.83193	-0.73211	1.49317		24.8	7.431	2.789	2.146	0.74	0.27	0.44	0.69	1.32	1.32	1.86	2.19	2.86
124	TAN2206_SW-64_11-12cm	2024-05-09 14:50:21	11.5	2.37	3.57	5.14	7.82	17.6	32.8	42.3	52.1	66.8	0.00237	0.00357	0.00514	0.00782	0.0176	0.0328	0.0423	0.0521	0.0668	8.7209	8.12986	7.60402	6.99862	5.82828	4.93016	4.5632	4.26257	3.90401	-3.04082	-0.760204	-4.81689	-0.729832	1.49004		24.9	5.385	2.781	1.913	0.75	0.27	0.44	0.69	1.32	1.32	1.86	2.19	2.86
125	TAN2206_SW-64_11-12cm	2024-05-09 14:50:45	11.5	2.37	3.57	5.14	7.82	17.6	32.8	42.3	52.2	67.1	0.00237	0.00357	0.00514	0.00782	0.0176	0.0328	0.0423	0.0522	0.0671	8.7209	8.12986	7.60402	6.99862	5.82828	4.93016	4.5632	4.25981	3.89754	-3.04082	-0.760204	-4.82335	-0.730811	1.49102		24.7	5.383	2.782	1.921	0.74	0.27	0.44	0.69	1.32	1.32	1.86	2.19	2.85
126	TAN2206_SW-64_11-12cm	2024-05-09 14:51:08	11.5	2.38	3.58	5.15	7.83	17.6	32.9	42.4	52.4	67.4	0.00238	0.00358	0.00515	0.00783	0.0176	0.0329	0.0424	0.0524	0.0674	8.71482	8.12582	7.60121	6.99677	5.82828	4.92577	4.55979	4.25429	3.89111	-3.04142	-0.760355	-4.82372	-0.730866	1.49122		24.7	4.365	2.781	1.8	0.74	0.27	0.44	0.69	1.32	1.32	1.86	2.18	2.85
127	TAN2206_SW-64_11-12cm	2024-05-09 14:51:32	11.5	2.38	3.58	5.16	7.84	17.6	32.9	42.4	52.4	67.4	0.00238	0.00358	0.00516	0.00784	0.0176	0.0329	0.0424	0.0524	0.0674	8.71482	8.12582	7.59841	6.99493	5.82828	4.92577	4.55979	4.25429	3.89111	-3.03862	-0.759655	-4.82372	-0.730866	1.49052		24.8	5.322	2.783	1.913	0.75	0.27	0.44	0.69	1.31	1.32	1.86	2.18	2.84
128	TAN2206_SW-64_11-12cm	2024-05-09 14:51:55	11.5	2.38	3.58	5.16	7.85	17.6	32.8	42.3	52	66.4	0.00238	0.00358	0.00516	0.00785	0.0176	0.0328	0.0423	0.052	0.0664	8.71482	8.12582	7.59841	6.99309	5.82828	4.93016	4.5632	4.26534	3.91267	-3.03521	-0.758804	-4.80215	-0.727598	1.4864		24.8	3.304	2.768	1.637	0.74	0.27	0.44	0.69	1.31	1.31	1.86	2.18	2.84
129	TAN2206_SW-64_11-12cm	2024-05-09 14:52:19	11.5	2.38	3.59	5.18	7.88	17.7	33	42.6	52.6	67.5	0.00238	0.00359	0.00518	0.00788	0.0177	0.033	0.0426	0.0526	0.0675	8.71482	8.1218	7.59283	6.98759	5.82011	4.92139	4.553	4.24879	3.88897	-3.03983	-0.759957	-4.82585	-0.73119	1.49115		24.9	4.18	2.781	1.77	0.74	0.27	0.44	0.69	1.31	1.31	1.85	2.17	2.83
130	TAN2206_SW-64_11-12cm	2024-05-09 14:52:47	11.5	2.38	3.58	5.16	7.86	17.6	32.9	42.4	52.3	67.1	0.00238	0.00358	0.00516	0.00786	0.0176	0.0329	0.0424	0.0523	0.0671	8.71482	8.12582	7.59841	6.99125	5.82828	4.92577	4.55979	4.25705	3.89754	-3.03862	-0.759655	-4.81728	-0.729891	1.48955		24.8	5.403	2.781	1.918	0.74	0.27	0.44	0.69	1.31	1.31	1.86	2.18	2.84
131	TAN2206_SW-64_11-12cm	2024-05-09 14:53:11	11.5	2.38	3.59	5.18	7.88	17.7	33	42.6	52.6	67.7	0.00238	0.00359	0.00518	0.00788	0.0177	0.033	0.0426	0.0526	0.0677	8.71482	8.1218	7.59283	6.98759	5.82011	4.92139	4.553	4.24879	3.8847	-3.03983	-0.759957	-4.83012	-0.731837	1.49179		24.8	4.203	2.782	1.776	0.74	0.27	0.44	0.69	1.31	1.31	1.85	2.17	2.83
132	Average of 'TAN2206_SW-64_11-12cm'	2024-05-09 14:49:32	11.5	2.38	3.58	5.16	7.84	17.6	32.9	42.4	52.3	67.3	0.00238	0.00358	0.00516	0.00784	0.0176	0.0329	0.0424	0.0523	0.0673	8.71482	8.12582	7.59841	6.99493	5.82828	4.92577	4.55979	4.25705	3.89325	-3.03862	-0.759655	-4.82157	-0.730541	1.4902		24.8	5.356	2.782	1.906	0.74	0.27	0.44	0.69	1.31	1.32	1.86	2.18	2.84
133	TAN2206_SW-64_12-13cm	2024-05-09 15:00:50	12.5	2.35	3.56	5.16	7.92	18.1	33.9	43.6	53.8	68.6	0.00235	0.00356	0.00516	0.00792	0.0181	0.0339	0.0436	0.0538	0.0686	8.73312	8.13391	7.59841	6.98028	5.78787	4.88257	4.51953	4.21625	3.86565	-3.07889	-0.769721	-4.86748	-0.737496	1.50722		25.8	3.789	2.811	1.698	0.81	0.28	0.46	0.7	1.31	1.31	1.85	2.17	2.82
134	TAN2206_SW-64_12-13cm	2024-05-09 15:01:15	12.5	2.35	3.56	5.15	7.9	18	33.7	43.3	53.4	68	0.00235	0.00356	0.00515	0.0079	0.018	0.0337	0.0433	0.0534	0.068	8.73312	8.13391	7.60121	6.98393	5.79586	4.89111	4.52949	4.22702	3.87832	-3.07172	-0.767931	-4.8548	-0.735576	1.50351		25.7	3.768	2.804	1.693	0.81	0.28	0.46	0.7	1.32	1.31	1.85	2.17	2.83
135	TAN2206_SW-64_12-13cm	2024-05-09 15:01:38	12.5	2.36	3.57	5.18	7.94	18.1	33.9	43.6	53.8	68.7	0.00236	0.00357	0.00518	0.00794	0.0181	0.0339	0.0436	0.0538	0.0687	8.727	8.12986	7.59283	6.97665	5.78787	4.88257	4.51953	4.21625	3.86355	-3.0733	-0.768326	-4.86345	-0.736887	1.50521		25.9	4.709	2.81	1.81	0.8	0.28	0.46	0.7	1.31	1.31	1.84	2.16	2.81
136	TAN2206_SW-64_12-13cm	2024-05-09 15:02:02	12.5	2.36	3.57	5.18	7.94	18.1	33.9	43.6	53.8	68.7	0.00236	0.00357	0.00518	0.00794	0.0181	0.0339	0.0436	0.0538	0.0687	8.727	8.12986	7.59283	6.97665	5.78787	4.88257	4.51953	4.21625	3.86355	-3.0733	-0.768326	-4.86345	-0.736887	1.50521		25.9	33.529	2.826	4.071	0.8	0.28	0.45	0.7	1.31	1.3	1.84	2.16	2.81
137	TAN2206_SW-64_12-13cm	2024-05-09 15:02:27	12.5	2.36	3.58	5.19	7.95	18.1	33.9	43.6	53.6	68.2	0.00236	0.00358	0.00519	0.00795	0.0181	0.0339	0.0436	0.0536	0.0682	8.727	8.12582	7.59005	6.97483	5.78787	4.88257	4.51953	4.22162	3.87408	-3.07052	-0.76763	-4.85291	-0.73529	1.50292		25.9	3.621	2.802	1.667	0.79	0.28	0.46	0.7	1.31	1.3	1.84	2.15	2.81
138	TAN2206_SW-64_12-13cm	2024-05-09 15:02:53	12.5	2.36	3.58	5.19	7.97	18.2	33.9	43.6	53.7	68.3	0.00236	0.00358	0.00519	0.00797	0.0182	0.0339	0.0436	0.0537	0.0683	8.727	8.12582	7.59005	6.9712	5.77992	4.88257	4.51953	4.21893	3.87197	-3.07052	-0.76763	-4.85503	-0.73561	1.50324		26	3.674	2.803	1.675	0.79	0.28	0.45	0.7	1.31	1.3	1.83	2.15	2.8
139	TAN2206_SW-64_12-13cm	2024-05-09 15:03:16	12.5	2.36	3.58	5.19	7.96	18.1	33.7	43.3	53.2	67.6	0.00236	0.00358	0.00519	0.00796	0.0181	0.0337	0.0433	0.0532	0.0676	8.727	8.12582	7.59005	6.97302	5.78787	4.89111	4.52949	4.23243	3.88683	-3.06056	-0.76514	-4.84016	-0.733358	1.4985		25.8	3.682	2.796	1.673	0.79	0.28	0.46	0.7	1.31	1.3	1.84	2.16	2.8
140	TAN2206_SW-64_12-13cm	2024-05-09 15:03:40	12.5	2.36	3.57	5.18	7.95	18.1	33.7	43.3	53.2	67.5	0.00236	0.00357	0.00518	0.00795	0.0181	0.0337	0.0433	0.0532	0.0675	8.727	8.12986	7.59283	6.97483	5.78787	4.89111	4.52949	4.23243	3.88897	-3.06334	-0.765836	-4.83803	-0.733035	1.49887		25.8	3.018	2.794	1.58	0.8	0.28	0.46	0.7	1.31	1.31	1.84	2.15	2.8
141	TAN2206_SW-64_12-13cm	2024-05-09 15:04:03	12.5	2.36	3.59	5.2	7.99	18.2	33.9	43.6	53.6	68.2	0.00236	0.00359	0.0052	0.00799	0.0182	0.0339	0.0436	0.0536	0.0682	8.727	8.1218	7.58727	6.96759	5.77992	4.88257	4.51953	4.22162	3.87408	-3.06774	-0.766936	-4.85291	-0.73529	1.50223		26	3.683	2.801	1.675	0.8	0.28	0.45	0.7	1.3	1.3	1.83	2.14	2.79
142	TAN2206_SW-64_12-13cm	2024-05-09 15:04:27	12.5	2.36	3.58	5.2	7.97	18.1	33.8	43.5	53.5	68.1	0.00236	0.00358	0.0052	0.00797	0.0181	0.0338	0.0435	0.0535	0.0681	8.727	8.12582	7.58727	6.9712	5.78787	4.88683	4.52284	4.22432	3.8762	-3.06443	-0.766108	-4.8508	-0.734969	1.50108		25.9	3.723	2.801	1.681	0.8	0.28	0.46	0.7	1.31	1.3	1.83	2.15	2.79
143	Average of 'TAN2206_SW-64_12-13cm'	2024-05-09 15:00:50	12.5	2.36	3.57	5.18	7.95	18.1	33.8	43.5	53.6	68.2	0.00236	0.00357	0.00518	0.00795	0.0181	0.0338	0.0435	0.0536	0.0682	8.727	8.12986	7.59283	6.97483	5.78787	4.88683	4.52284	4.22162	3.87408	-3.06999	-0.767498	-4.85291	-0.73529	1.50279		25.9	9.297	2.805	2.069	0.8	0.28	0.46	0.7	1.31	1.3	1.84	2.16	2.81
144	TAN2206_SW-64_13-14cm	2024-05-09 15:11:33	13.5	2.47	3.75	5.44	8.32	18.7	34.2	43.5	53	66.3	0.00247	0.00375	0.00544	0.00832	0.0187	0.0342	0.0435	0.053	0.0663	8.66127	8.05889	7.52218	6.9092	5.74082	4.86986	4.52284	4.23786	3.91485	-2.99934	-0.749834	-4.74643	-0.719155	1.46899		26.8	2.559	2.734	1.47	0.62	0.25	0.41	0.64	1.23	1.24	1.75	2.06	2.69
145	TAN2206_SW-64_13-14cm	2024-05-09 15:11:59	13.5	2.47	3.75	5.43	8.29	18.6	34.2	43.5	53	66.4	0.00247	0.00375	0.00543	0.00829	0.0186	0.0342	0.0435	0.053	0.0664	8.66127	8.05889	7.52483	6.91441	5.74855	4.86986	4.52284	4.23786	3.91267	-3.00199	-0.750498	-4.7486	-0.719485	1.46998		26.8	2.661	2.735	1.49	0.61	0.25	0.41	0.65	1.24	1.24	1.76	2.06	2.69
146	TAN2206_SW-64_13-14cm	2024-05-09 15:12:22	13.5	2.48	3.77	5.46	8.34	18.7	34.3	43.7	53.2	66.7	0.00248	0.00377	0.00546	0.00834	0.0187	0.0343	0.0437	0.0532	0.0667	8.65544	8.05122	7.51688	6.90574	5.74082	4.86565	4.51622	4.23243	3.90617	-3.00066	-0.750165	-4.74927	-0.719587	1.46975		27	2.719	2.736	1.499	0.6	0.25	0.41	0.64	1.23	1.24	1.75	2.05	2.68
147	TAN2206_SW-64_13-14cm	2024-05-09 15:12:48	13.5	2.48	3.77	5.46	8.35	18.7	34.3	43.7	53.2	66.6	0.00248	0.00377	0.00546	0.00835	0.0187	0.0343	0.0437	0.0532	0.0666	8.65544	8.05122	7.51688	6.90401	5.74082	4.86565	4.51622	4.23243	3.90833	-3.00066	-0.750165	-4.74711	-0.719259	1.46942		26.9	2.622	2.734	1.482	0.6	0.25	0.41	0.64	1.23	1.24	1.75	2.05	2.67
148	TAN2206_SW-64_13-14cm	2024-05-09 15:13:11	13.5	2.48	3.78	5.47	8.37	18.8	34.3	43.7	53.1	66.5	0.00248	0.00378	0.00547	0.00837	0.0188	0.0343	0.0437	0.0531	0.0665	8.65544	8.0474	7.51424	6.90056	5.73312	4.86565	4.51622	4.23514	3.9105	-2.99802	-0.749505	-4.74494	-0.718931	1.46844		27	2.684	2.732	1.491	0.6	0.25	0.41	0.64	1.23	1.23	1.74	2.04	2.67
149	TAN2206_SW-64_13-14cm	2024-05-09 15:13:37	13.5	2.48	3.78	5.48	8.38	18.8	34.4	43.8	53.3	66.7	0.00248	0.00378	0.00548	0.00838	0.0188	0.0344	0.0438	0.0533	0.0667	8.65544	8.0474	7.51161	6.89883	5.73312	4.86145	4.51293	4.22972	3.90617	-2.99868	-0.749671	-4.74927	-0.719587	1.46926		27	2.695	2.734	1.494	0.6	0.25	0.41	0.64	1.23	1.23	1.74	2.04	2.66
150	TAN2206_SW-64_13-14cm	2024-05-09 15:14:02	13.5	2.48	3.78	5.49	8.39	18.8	34.4	43.8	53.2	66.6	0.00248	0.00378	0.00549	0.00839	0.0188	0.0344	0.0438	0.0532	0.0666	8.65544	8.0474	7.50898	6.89711	5.73312	4.86145	4.51293	4.23243	3.90833	-2.99605	-0.749013	-4.74711	-0.719259	1.46827		27.1	2.667	2.733	1.487	0.6	0.25	0.41	0.64	1.23	1.23	1.74	2.03	2.65
151	TAN2206_SW-64_13-14cm	2024-05-09 15:14:26	13.5	2.48	3.78	5.49	8.39	18.8	34.3	43.6	52.9	66	0.00248	0.00378	0.00549	0.00839	0.0188	0.0343	0.0436	0.0529	0.066	8.65544	8.0474	7.50898	6.89711	5.73312	4.86565	4.51953	4.24059	3.92139	-2.98945	-0.747363	-4.73405	-0.717281	1.46464		27.1	2.059	2.724	1.383	0.61	0.25	0.41	0.64	1.23	1.23	1.73	2.03	2.65
152	TAN2206_SW-64_13-14cm	2024-05-09 15:14:49	13.5	2.48	3.79	5.5	8.42	18.8	34.5	43.9	53.4	66.6	0.00248	0.00379	0.0055	0.00842	0.0188	0.0345	0.0439	0.0534	0.0666	8.65544	8.04359	7.50635	6.89196	5.73312	4.85726	4.50964	4.22702	3.90833	-2.99672	-0.749179	-4.74711	-0.719259	1.46844		27	2.456	2.731	1.451	0.6	0.25	0.41	0.64	1.23	1.23	1.73	2.03	2.64
153	TAN2206_SW-64_13-14cm	2024-05-09 15:15:13	13.5	2.48	3.78	5.49	8.4	18.8	34.3	43.6	53	66.3	0.00248	0.00378	0.00549	0.0084	0.0188	0.0343	0.0436	0.053	0.0663	8.65544	8.0474	7.50898	6.89539	5.73312	4.86565	4.51953	4.23786	3.91485	-2.98945	-0.747363	-4.7406	-0.718272	1.46563		26.9	2.612	2.728	1.476	0.6	0.25	0.41	0.64	1.23	1.23	1.74	2.03	2.65
154	Average of 'TAN2206_SW-64_13-14cm'	2024-05-09 15:11:33	13.5	2.48	3.77	5.47	8.36	18.8	34.3	43.7	53.1	66.5	0.00248	0.00377	0.00547	0.00836	0.0188	0.0343	0.0437	0.0531	0.0665	8.65544	8.05122	7.51424	6.90228	5.73312	4.86565	4.51622	4.23514	3.9105	-2.99802	-0.749505	-4.74494	-0.718931	1.46844		27	2.579	2.732	1.473	0.61	0.25	0.41	0.64	1.23	1.23	1.74	2.04	2.67
155	TAN2206_SW-64_14-15cm	2024-05-09 15:22:46	14.5	2.39	3.62	5.26	8.06	18.3	33.8	43.3	53	66.7	0.00239	0.00362	0.00526	0.00806	0.0183	0.0338	0.0433	0.053	0.0667	8.70877	8.10979	7.57072	6.955	5.77201	4.88683	4.52949	4.23786	3.90617	-3.04123	-0.760308	-4.8026	-0.727667	1.48798		26.2	2.84	2.777	1.535	0.79	0.27	0.45	0.68	1.28	1.27	1.8	2.12	2.77
156	TAN2206_SW-64_14-15cm	2024-05-09 15:23:09	14.5	2.39	3.63	5.26	8.05	18.2	33.8	43.4	53.3	67.6	0.00239	0.00363	0.00526	0.00805	0.0182	0.0338	0.0434	0.0533	0.0676	8.70877	8.10581	7.57072	6.9568	5.77992	4.88683	4.52616	4.22972	3.88683	-3.04456	-0.76114	-4.82194	-0.730597	1.49174		26	3.657	2.784	1.663	0.77	0.27	0.44	0.68	1.28	1.27	1.8	2.12	2.77
157	TAN2206_SW-64_14-15cm	2024-05-09 15:23:35	14.5	2.4	3.64	5.28	8.08	18.3	34	43.5	53.4	67.7	0.0024	0.00364	0.00528	0.00808	0.0183	0.034	0.0435	0.0534	0.0677	8.70275	8.10185	7.56525	6.95143	5.77201	4.87832	4.52284	4.22702	3.8847	-3.04241	-0.760601	-4.81805	-0.730008	1.49061		26.2	3.692	2.784	1.667	0.77	0.27	0.44	0.68	1.27	1.27	1.8	2.11	2.76
158	TAN2206_SW-64_14-15cm	2024-05-09 15:23:58	14.5	2.4	3.64	5.29	8.1	18.3	34	43.6	53.6	68	0.0024	0.00364	0.00529	0.0081	0.0183	0.034	0.0436	0.0536	0.068	8.70275	8.10185	7.56252	6.94786	5.77201	4.87832	4.51953	4.22162	3.87832	-3.04299	-0.760747	-4.82443	-0.730974	1.49172		26	3.769	2.785	1.683	0.76	0.27	0.44	0.68	1.27	1.27	1.79	2.11	2.75
159	TAN2206_SW-64_14-15cm	2024-05-09 15:24:22	14.5	2.41	3.66	5.31	8.14	18.4	34.1	43.7	53.5	67.6	0.00241	0.00366	0.00531	0.00814	0.0184	0.0341	0.0437	0.0535	0.0676	8.69675	8.09394	7.55707	6.94076	5.76415	4.87408	4.51622	4.22432	3.88683	-3.04085	-0.760212	-4.80992	-0.728775	1.48899		26.3	2.902	2.777	1.55	0.76	0.27	0.44	0.67	1.26	1.26	1.78	2.09	2.74
160	TAN2206_SW-64_14-15cm	2024-05-09 15:24:47	14.5	2.4	3.65	5.3	8.12	18.3	33.9	43.4	53.2	67	0.0024	0.00365	0.0053	0.00812	0.0183	0.0339	0.0434	0.0532	0.067	8.70275	8.09789	7.55979	6.9443	5.77201	4.88257	4.52616	4.23243	3.8997	-3.03363	-0.758408	-4.80305	-0.727736	1.48614		26.2	2.916	2.773	1.55	0.76	0.27	0.44	0.68	1.27	1.26	1.79	2.1	2.74
161	TAN2206_SW-64_14-15cm	2024-05-09 15:25:11	14.5	2.41	3.66	5.32	8.16	18.4	34.1	43.6	53.5	67.7	0.00241	0.00366	0.00532	0.00816	0.0184	0.0341	0.0436	0.0535	0.0677	8.69675	8.09394	7.55436	6.93722	5.76415	4.87408	4.51953	4.22432	3.8847	-3.03483	-0.758707	-4.81205	-0.729099	1.48781		26.2	3.57	2.779	1.645	0.76	0.27	0.44	0.67	1.26	1.26	1.78	2.09	2.73
162	TAN2206_SW-64_14-15cm	2024-05-09 15:25:34	14.5	2.4	3.66	5.32	8.15	18.4	34.1	43.6	53.5	67.8	0.0024	0.00366	0.00532	0.00815	0.0184	0.0341	0.0436	0.0535	0.0678	8.70275	8.09394	7.55436	6.93898	5.76415	4.87408	4.51953	4.22432	3.88257	-3.03483	-0.758707	-4.82018	-0.73033	1.48904		26.2	3.7	2.78	1.666	0.76	0.27	0.44	0.67	1.27	1.26	1.78	2.09	2.73
163	TAN2206_SW-64_14-15cm	2024-05-09 15:25:58	14.5	2.4	3.66	5.31	8.15	18.4	33.9	43.4	53	66.9	0.0024	0.00366	0.00531	0.00815	0.0184	0.0339	0.0434	0.053	0.0669	8.70275	8.09394	7.55707	6.93898	5.76415	4.88257	4.52616	4.23786	3.90185	-3.03091	-0.757728	-4.8009	-0.727409	1.48514		26.2	2.923	2.769	1.549	0.76	0.27	0.44	0.68	1.27	1.26	1.78	2.09	2.73
164	TAN2206_SW-64_14-15cm	2024-05-09 15:26:23	14.5	2.41	3.66	5.33	8.18	18.4	34.1	43.7	53.5	67.6	0.00241	0.00366	0.00533	0.00818	0.0184	0.0341	0.0437	0.0535	0.0676	8.69675	8.09394	7.55165	6.93368	5.76415	4.87408	4.51622	4.22432	3.88683	-3.03543	-0.758856	-4.80992	-0.728775	1.48763		26.2	2.898	2.775	1.549	0.76	0.27	0.44	0.67	1.26	1.26	1.78	2.09	2.72
165	Average of 'TAN2206_SW-64_14-15cm'	2024-05-09 15:22:46	14.5	2.4	3.65	5.3	8.12	18.3	34	43.5	53.3	67.5	0.0024	0.00365	0.0053	0.00812	0.0183	0.034	0.0435	0.0533	0.0675	8.70275	8.09789	7.55979	6.9443	5.77201	4.87832	4.52284	4.22972	3.88897	-3.03695	-0.759238	-4.81378	-0.729361	1.4886		26.2	3.308	2.778	1.608	0.76	0.27	0.44	0.68	1.27	1.27	1.79	2.1	2.74
166	TAN2206_SW-64_15-16cm	2024-05-09 15:35:48	15.5	2.79	4.47	6.74	10.7	23.8	42.8	54.7	67.2	87	0.00279	0.00447	0.00674	0.0107	0.0238	0.0428	0.0547	0.0672	0.087	8.48552	7.80551	7.21304	6.54625	5.39289	4.54625	4.19232	3.89539	3.52284	-3.02072	-0.75518	-4.96268	-0.751921	1.5071		32	12.488	2.842	2.701	0.49	0.2	0.33	0.52	0.98	0.99	1.39	1.63	2.12
167	TAN2206_SW-64_15-16cm	2024-05-09 15:36:12	15.5	2.79	4.47	6.74	10.7	23.8	43.1	55.2	68.1	88.5	0.00279	0.00447	0.00674	0.0107	0.0238	0.0431	0.0552	0.0681	0.0885	8.48552	7.80551	7.21304	6.54625	5.39289	4.53617	4.17919	3.8762	3.49818	-3.03385	-0.758462	-4.98734	-0.755658	1.51412		32	11.72	2.852	2.636	0.49	0.2	0.33	0.52	0.98	0.99	1.39	1.63	2.12
168	TAN2206_SW-64_15-16cm	2024-05-09 15:36:36	15.5	2.8	4.49	6.77	10.7	23.9	43.2	55.3	68.2	88.9	0.0028	0.00449	0.00677	0.0107	0.0239	0.0432	0.0553	0.0682	0.0889	8.48036	7.79907	7.20663	6.54625	5.38685	4.53282	4.17658	3.87408	3.49167	-3.03005	-0.757513	-4.98868	-0.755861	1.51337		32.2	15.702	2.86	3.038	0.49	0.21	0.33	0.51	0.98	0.98	1.38	1.62	2.11
169	TAN2206_SW-64_15-16cm	2024-05-09 15:36:59	15.5	2.78	4.45	6.71	10.6	23.6	42.5	54.3	66.5	85.5	0.00278	0.00445	0.00671	0.0106	0.0236	0.0425	0.0543	0.0665	0.0855	8.4907	7.81198	7.21947	6.55979	5.40507	4.55639	4.2029	3.9105	3.54793	-3.01657	-0.754142	-4.94277	-0.748904	1.50305		31.9	8.115	2.823	2.204	0.49	0.21	0.34	0.52	0.99	0.99	1.4	1.63	2.13
170	TAN2206_SW-64_15-16cm	2024-05-09 15:37:24	15.5	2.8	4.49	6.78	10.8	23.9	43.2	55.3	68.2	89.1	0.0028	0.00449	0.00678	0.0108	0.0239	0.0432	0.0553	0.0682	0.0891	8.48036	7.79907	7.2045	6.53282	5.38685	4.53282	4.17658	3.87408	3.48843	-3.02792	-0.756981	-4.99193	-0.756353	1.51333		32.1	22.453	2.87	3.677	0.49	0.2	0.33	0.51	0.98	0.98	1.38	1.62	2.1
171	TAN2206_SW-64_15-16cm	2024-05-09 15:37:47	15.5	2.79	4.49	6.77	10.7	23.8	43	55	67.8	88.2	0.00279	0.00449	0.00677	0.0107	0.0238	0.043	0.055	0.0678	0.0882	8.48552	7.79907	7.20663	6.54625	5.39289	4.53952	4.18442	3.88257	3.50308	-3.0222	-0.755551	-4.98244	-0.754915	1.51047		32.1	21.752	2.863	3.592	0.49	0.21	0.33	0.51	0.98	0.98	1.39	1.62	2.11
172	TAN2206_SW-64_15-16cm	2024-05-09 15:38:14	15.5	2.8	4.51	6.81	10.8	24	43.4	55.6	68.8	90.2	0.0028	0.00451	0.00681	0.0108	0.024	0.0434	0.0556	0.0688	0.0902	8.48036	7.79266	7.19813	6.53282	5.38082	4.52616	4.16877	3.86145	3.47073	-3.02936	-0.75734	-5.00963	-0.759035	1.51637		32.2	16.643	2.871	3.183	0.49	0.2	0.33	0.51	0.98	0.98	1.38	1.61	2.09
173	TAN2206_SW-64_15-16cm	2024-05-09 15:38:37	15.5	2.79	4.49	6.77	10.7	23.8	42.8	54.6	67	86.5	0.00279	0.00449	0.00677	0.0107	0.0238	0.0428	0.0546	0.067	0.0865	8.48552	7.79907	7.20663	6.54625	5.39289	4.54625	4.19496	3.8997	3.53116	-3.01167	-0.752918	-4.95436	-0.750661	1.50358		32.1	12.91	2.839	2.747	0.49	0.21	0.33	0.52	0.98	0.98	1.39	1.62	2.1
174	TAN2206_SW-64_15-16cm	2024-05-09 15:39:01	15.5	2.8	4.5	6.79	10.8	23.9	43.1	55.2	68	88.3	0.0028	0.0045	0.00679	0.0108	0.0239	0.0431	0.0552	0.068	0.0883	8.48036	7.79586	7.20237	6.53282	5.38685	4.53617	4.17919	3.87832	3.50144	-3.02318	-0.755796	-4.97891	-0.754381	1.51018		32.1	12.484	2.849	2.723	0.49	0.21	0.33	0.51	0.98	0.98	1.38	1.61	2.1
175	TAN2206_SW-64_15-16cm	2024-05-09 15:39:24	15.5	2.8	4.52	6.84	10.9	24.1	43.5	55.7	68.8	90.1	0.0028	0.00452	0.00684	0.0109	0.0241	0.0435	0.0557	0.0688	0.0901	8.48036	7.78946	7.19179	6.51953	5.37482	4.52284	4.16618	3.86145	3.47233	-3.02561	-0.756402	-5.00803	-0.758792	1.51519		32.2	17.324	2.869	3.251	0.48	0.21	0.33	0.51	0.97	0.98	1.37	1.6	2.08
176	Average of 'TAN2206_SW-64_15-16cm'	2024-05-09 15:35:48	15.5	2.79	4.49	6.77	10.7	23.9	43.1	55.1	67.9	88.2	0.00279	0.00449	0.00677	0.0107	0.0239	0.0431	0.0551	0.0679	0.0882	8.48552	7.79907	7.20663	6.54625	5.38685	4.53617	4.1818	3.88044	3.50308	-3.02482	-0.756206	-4.98244	-0.754915	1.51112		32.1	16.396	2.854	3.068	0.49	0.21	0.33	0.51	0.98	0.98	1.39	1.62	2.1
177	TAN2206_SW-64_16-17cm	2024-05-09 15:46:52	16.5	2.5	3.91	5.8	9.08	20.3	36.1	45.3	54.7	67.7	0.0025	0.00391	0.0058	0.00908	0.0203	0.0361	0.0453	0.0547	0.0677	8.64386	7.99862	7.42973	6.78309	5.62238	4.79186	4.46435	4.19232	3.8847	-2.96539	-0.741347	-4.75916	-0.721084	1.46243		28.7	2.181	2.741	1.364	0.74	0.26	0.41	0.62	1.15	1.14	1.61	1.89	2.46
178	TAN2206_SW-64_16-17cm	2024-05-09 15:47:15	16.5	2.51	3.92	5.81	9.09	20.3	36.1	45.4	54.8	67.8	0.00251	0.00392	0.00581	0.00909	0.0203	0.0361	0.0454	0.0548	0.0678	8.6381	7.99493	7.42725	6.7815	5.62238	4.79186	4.46116	4.18968	3.88257	-2.96608	-0.741521	-4.75553	-0.720534	1.46205		28.8	2.153	2.741	1.359	0.73	0.26	0.41	0.62	1.15	1.14	1.61	1.89	2.46
179	TAN2206_SW-64_16-17cm	2024-05-09 15:47:39	16.5	2.51	3.92	5.81	9.08	20.2	36.1	45.3	54.8	67.8	0.00251	0.00392	0.00581	0.00908	0.0202	0.0361	0.0453	0.0548	0.0678	8.6381	7.99493	7.42725	6.78309	5.6295	4.79186	4.46435	4.18968	3.88257	-2.9629	-0.740725	-4.75553	-0.720534	1.46126		28.7	2.149	2.74	1.361	0.72	0.26	0.41	0.62	1.15	1.14	1.61	1.89	2.46
180	TAN2206_SW-64_16-17cm	2024-05-09 15:48:04	16.5	2.52	3.94	5.84	9.12	20.3	36.2	45.4	54.7	67.4	0.00252	0.00394	0.00584	0.00912	0.0203	0.0362	0.0454	0.0547	0.0674	8.63236	7.98759	7.41982	6.77675	5.62238	4.78787	4.46116	4.19232	3.89111	-2.95865	-0.739663	-4.74125	-0.718372	1.45803		28.9	1.723	2.732	1.284	0.71	0.26	0.41	0.61	1.14	1.14	1.6	1.88	2.45
181	TAN2206_SW-64_16-17cm	2024-05-09 15:48:29	16.5	2.52	3.94	5.85	9.14	20.3	36.2	45.5	54.9	67.9	0.00252	0.00394	0.00585	0.00914	0.0203	0.0362	0.0455	0.0549	0.0679	8.63236	7.98759	7.41735	6.77359	5.62238	4.78787	4.45799	4.18705	3.88044	-2.95936	-0.73984	-4.75192	-0.719987	1.45983		28.8	2.068	2.735	1.345	0.71	0.26	0.41	0.61	1.14	1.14	1.6	1.87	2.44
182	TAN2206_SW-64_16-17cm	2024-05-09 15:48:52	16.5	2.52	3.95	5.85	9.14	20.4	36.2	45.4	54.8	67.8	0.00252	0.00395	0.00585	0.00914	0.0204	0.0362	0.0454	0.0548	0.0678	8.63236	7.98393	7.41735	6.77359	5.61529	4.78787	4.46116	4.18968	3.88257	-2.95618	-0.739046	-4.74979	-0.719665	1.45871		28.9	2.097	2.734	1.348	0.71	0.26	0.41	0.61	1.14	1.13	1.6	1.87	2.44
183	TAN2206_SW-64_16-17cm	2024-05-09 15:49:16	16.5	2.52	3.95	5.86	9.16	20.4	36.3	45.5	54.9	67.9	0.00252	0.00395	0.00586	0.00916	0.0204	0.0363	0.0455	0.0549	0.0679	8.63236	7.98393	7.41488	6.77044	5.61529	4.78389	4.45799	4.18705	3.88044	-2.95689	-0.739223	-4.75192	-0.719987	1.45921		28.9	2.135	2.735	1.355	0.71	0.26	0.41	0.61	1.14	1.13	1.59	1.87	2.43
184	TAN2206_SW-64_16-17cm	2024-05-09 15:49:40	16.5	2.55	3.99	5.91	9.24	20.5	36.6	46	55.8	69.6	0.00255	0.00399	0.00591	0.00924	0.0205	0.0366	0.046	0.0558	0.0696	8.61529	7.9694	7.40263	6.75789	5.60823	4.77201	4.44222	4.16359	3.84477	-2.9604	-0.740101	-4.77052	-0.722806	1.46291		28.9	31.062	2.757	3.834	0.64	0.26	0.41	0.61	1.13	1.13	1.59	1.86	2.42
185	TAN2206_SW-64_16-17cm	2024-05-09 15:50:03	16.5	2.53	3.97	5.89	9.21	20.5	36.5	45.9	55.6	69.4	0.00253	0.00397	0.00589	0.00921	0.0205	0.0365	0.0459	0.0556	0.0694	8.62665	7.97665	7.40752	6.76258	5.60823	4.77596	4.44536	4.16877	3.84892	-2.96215	-0.740539	-4.77773	-0.723898	1.46444		28.9	33.267	2.767	4.02	0.71	0.26	0.41	0.61	1.13	1.13	1.59	1.86	2.42
186	TAN2206_SW-64_16-17cm	2024-05-09 15:50:27	16.5	2.52	3.96	5.88	9.18	20.4	36.3	45.5	54.9	67.8	0.00252	0.00396	0.00588	0.00918	0.0204	0.0363	0.0455	0.0549	0.0678	8.63236	7.98028	7.40997	6.76729	5.61529	4.78389	4.45799	4.18705	3.88257	-2.95198	-0.737995	-4.74979	-0.719665	1.45766		28.9	2.031	2.732	1.335	0.71	0.26	0.41	0.61	1.14	1.13	1.59	1.86	2.42
187	Average of 'TAN2206_SW-64_16-17cm'	2024-05-09 15:46:52	16.5	2.52	3.94	5.85	9.14	20.4	36.3	45.5	55	68.1	0.00252	0.00394	0.00585	0.00914	0.0204	0.0363	0.0455	0.055	0.0681	8.63236	7.98759	7.41735	6.77359	5.61529	4.78389	4.45799	4.18442	3.8762	-2.95936	-0.73984	-4.75616	-0.72063	1.46047		28.8	13.544	2.742	2.19	0.71	0.26	0.41	0.61	1.14	1.13	1.6	1.87	2.44
188	TAN2206_SW-64_17-18cm	2024-05-09 15:57:47	17.5	2.57	3.94	5.75	8.86	19.9	36	45.5	55.3	68.9	0.00257	0.00394	0.00575	0.00886	0.0199	0.036	0.0455	0.0553	0.0689	8.60402	7.98759	7.44222	6.81848	5.65109	4.79586	4.45799	4.17658	3.85935	-2.98423	-0.746058	-4.74466	-0.718888	1.46495		28.5	2.347	2.729	1.418	0.54	0.23	0.38	0.6	1.16	1.17	1.65	1.94	2.53
189	TAN2206_SW-64_17-18cm	2024-05-09 15:58:11	17.5	2.57	3.95	5.75	8.86	19.9	36.2	45.8	55.7	69.4	0.00257	0.00395	0.00575	0.00886	0.0199	0.0362	0.0458	0.0557	0.0694	8.60402	7.98393	7.44222	6.81848	5.65109	4.78787	4.44851	4.16618	3.84892	-2.99371	-0.748428	-4.7551	-0.720469	1.4689		28.8	2.336	2.734	1.418	0.53	0.23	0.38	0.6	1.16	1.17	1.65	1.93	2.53
190	TAN2206_SW-64_17-18cm	2024-05-09 15:58:35	17.5	2.57	3.95	5.75	8.85	19.9	36.1	45.6	55.3	68.9	0.00257	0.00395	0.00575	0.00885	0.0199	0.0361	0.0456	0.0553	0.0689	8.60402	7.98393	7.44222	6.82011	5.65109	4.79186	4.45482	4.17658	3.85935	-2.9874	-0.74685	-4.74466	-0.718888	1.46574		28.7	2.279	2.729	1.405	0.53	0.23	0.38	0.6	1.16	1.17	1.65	1.94	2.53
191	TAN2206_SW-64_17-18cm	2024-05-09 15:58:58	17.5	2.57	3.94	5.74	8.84	19.8	36	45.5	55.2	68.7	0.00257	0.00394	0.00574	0.00884	0.0198	0.036	0.0455	0.0552	0.0687	8.60402	7.98759	7.44473	6.82174	5.65836	4.79586	4.45799	4.17919	3.86355	-2.98674	-0.746686	-4.74047	-0.718253	1.46494		28.5	2.276	2.727	1.405	0.53	0.23	0.38	0.6	1.16	1.17	1.65	1.94	2.54
192	TAN2206_SW-64_17-18cm	2024-05-09 15:59:24	17.5	2.57	3.95	5.75	8.86	19.9	36.1	45.5	55.2	68.6	0.00257	0.00395	0.00575	0.00886	0.0199	0.0361	0.0455	0.0552	0.0686	8.60402	7.98393	7.44222	6.81848	5.65109	4.79186	4.45799	4.17919	3.86565	-2.98423	-0.746058	-4.73837	-0.717935	1.46399		28.7	2.235	2.726	1.394	0.53	0.23	0.38	0.6	1.16	1.17	1.65	1.93	2.53
193	TAN2206_SW-64_17-18cm	2024-05-09 15:59:47	17.5	2.57	3.96	5.77	8.89	19.9	36.1	45.6	55.3	68.6	0.00257	0.00396	0.00577	0.00889	0.0199	0.0361	0.0456	0.0553	0.0686	8.60402	7.98028	7.43721	6.8136	5.65109	4.79186	4.45482	4.17658	3.86565	-2.98239	-0.745598	-4.73837	-0.717935	1.46353		28.8	2.148	2.725	1.377	0.53	0.23	0.38	0.6	1.15	1.16	1.64	1.93	2.52
194	TAN2206_SW-64_17-18cm	2024-05-09 16:00:11	17.5	2.57	3.96	5.79	8.91	19.9	36.2	45.7	55.5	69.1	0.00257	0.00396	0.00579	0.00891	0.0199	0.0362	0.0457	0.0555	0.0691	8.60402	7.98028	7.43222	6.81036	5.65109	4.78787	4.45166	4.17137	3.85517	-2.98056	-0.74514	-4.74885	-0.719522	1.46466		28.7	2.278	2.727	1.405	0.53	0.23	0.38	0.6	1.15	1.16	1.64	1.92	2.51
195	TAN2206_SW-64_17-18cm	2024-05-09 16:00:34	17.5	2.57	3.96	5.78	8.91	19.9	36.2	45.7	55.5	69.1	0.00257	0.00396	0.00578	0.00891	0.0199	0.0362	0.0457	0.0555	0.0691	8.60402	7.98028	7.43471	6.81036	5.65109	4.78787	4.45166	4.17137	3.85517	-2.98305	-0.745763	-4.74885	-0.719522	1.46529		28.7	2.288	2.728	1.407	0.53	0.23	0.38	0.6	1.16	1.16	1.64	1.92	2.51
196	TAN2206_SW-64_17-18cm	2024-05-09 16:00:58	17.5	2.57	3.97	5.79	8.93	20	36.3	45.8	55.5	69	0.00257	0.00397	0.00579	0.00893	0.02	0.0363	0.0458	0.0555	0.069	8.60402	7.97665	7.43222	6.80712	5.64386	4.78389	4.44851	4.17137	3.85726	-2.98371	-0.745928	-4.74676	-0.719205	1.46513		28.9	2.131	2.726	1.375	0.53	0.23	0.38	0.6	1.15	1.16	1.64	1.92	2.5
197	TAN2206_SW-64_17-18cm	2024-05-09 16:01:22	17.5	2.57	3.96	5.78	8.9	19.9	36.2	45.7	55.5	69.2	0.00257	0.00396	0.00578	0.0089	0.0199	0.0362	0.0457	0.0555	0.0692	8.60402	7.98028	7.43471	6.81198	5.65109	4.78787	4.45166	4.17137	3.85308	-2.98305	-0.745763	-4.75093	-0.719838	1.4656		28.7	2.305	2.729	1.41	0.53	0.23	0.38	0.6	1.16	1.16	1.64	1.92	2.51
198	Average of 'TAN2206_SW-64_17-18cm'	2024-05-09 15:57:47	17.5	2.57	3.95	5.77	8.88	19.9	36.1	45.6	55.4	68.9	0.00257	0.00395	0.00577	0.00888	0.0199	0.0361	0.0456	0.0554	0.0689	8.60402	7.98393	7.43721	6.81522	5.65109	4.79186	4.45482	4.17397	3.85935	-2.98239	-0.745598	-4.74466	-0.718888	1.46449		28.7	2.264	2.728	1.402	0.53	0.23	0.38	0.6	1.16	1.16	1.65	1.93	2.52
199	TAN2206_SW-64_18-19cm	2024-05-09 16:08:29	18.5	2.86	4.62	6.94	11	23.9	41.2	51.1	61	74.6	0.00286	0.00462	0.00694	0.011	0.0239	0.0412	0.0511	0.061	0.0746	8.44977	7.75789	7.17085	6.50635	5.38685	4.60121	4.29053	4.03505	3.74468	-2.88032	-0.720079	-4.70509	-0.712892	1.43297		33.3	1.521	2.691	1.204	0.46	0.2	0.32	0.49	0.94	0.94	1.33	1.56	2.04
200	TAN2206_SW-64_18-19cm	2024-05-09 16:08:53	18.5	2.86	4.61	6.92	10.9	23.8	41.1	51	60.9	74.4	0.00286	0.00461	0.00692	0.0109	0.0238	0.0411	0.051	0.0609	0.0744	8.44977	7.76102	7.17501	6.51953	5.39289	4.60472	4.29336	4.03741	3.74855	-2.88165	-0.720413	-4.70122	-0.712305	1.43272		33.2	1.473	2.691	1.195	0.45	0.2	0.32	0.49	0.94	0.95	1.34	1.57	2.05
201	TAN2206_SW-64_18-19cm	2024-05-09 16:09:18	18.5	2.87	4.63	6.95	11	23.9	41.4	51.3	61.3	74.8	0.00287	0.00463	0.00695	0.011	0.0239	0.0414	0.0513	0.0613	0.0748	8.44473	7.75477	7.16877	6.50635	5.38685	4.59423	4.2849	4.02797	3.74082	-2.88387	-0.720968	-4.70392	-0.712714	1.43368		33.5	1.469	2.693	1.193	0.45	0.2	0.32	0.49	0.94	0.94	1.33	1.56	2.04
202	TAN2206_SW-64_18-19cm	2024-05-09 16:09:42	18.5	2.87	4.63	6.96	11	23.9	41.3	51.3	61.2	74.7	0.00287	0.00463	0.00696	0.011	0.0239	0.0413	0.0513	0.0612	0.0747	8.44473	7.75477	7.1667	6.50635	5.38685	4.59771	4.2849	4.03032	3.74275	-2.8818	-0.72045	-4.70199	-0.712422	1.43287		33.4	1.467	2.69	1.193	0.45	0.2	0.32	0.49	0.94	0.94	1.33	1.56	2.03
203	TAN2206_SW-64_18-19cm	2024-05-09 16:10:05	18.5	2.87	4.65	6.99	11	24	41.4	51.3	61.3	74.8	0.00287	0.00465	0.00699	0.011	0.024	0.0414	0.0513	0.0613	0.0748	8.44473	7.74855	7.16049	6.50635	5.38082	4.59423	4.2849	4.02797	3.74082	-2.87559	-0.718899	-4.70392	-0.712714	1.43161		33.4	1.466	2.689	1.192	0.44	0.2	0.32	0.49	0.94	0.94	1.33	1.55	2.03
204	TAN2206_SW-64_18-19cm	2024-05-09 16:10:29	18.5	2.86	4.63	6.96	11	23.9	41.3	51.2	61.1	74.4	0.00286	0.00463	0.00696	0.011	0.0239	0.0413	0.0512	0.0611	0.0744	8.44977	7.75477	7.1667	6.50635	5.38685	4.59771	4.28771	4.03268	3.74855	-2.87898	-0.719746	-4.70122	-0.712305	1.43205		33.5	1.405	2.689	1.177	0.45	0.2	0.32	0.49	0.94	0.94	1.33	1.55	2.03
205	TAN2206_SW-64_18-19cm	2024-05-09 16:10:53	18.5	2.87	4.64	6.97	11	23.9	41.3	51.2	61.1	74.7	0.00287	0.00464	0.00697	0.011	0.0239	0.0413	0.0512	0.0611	0.0747	8.44473	7.75166	7.16463	6.50635	5.38685	4.59771	4.28771	4.03268	3.74275	-2.87691	-0.719228	-4.70199	-0.712422	1.43165		33.3	1.54	2.689	1.208	0.45	0.2	0.32	0.49	0.94	0.94	1.33	1.55	2.03
206	TAN2206_SW-64_18-19cm	2024-05-09 16:11:18	18.5	2.86	4.63	6.96	11	23.9	41.2	51.1	60.9	74.4	0.00286	0.00463	0.00696	0.011	0.0239	0.0412	0.0511	0.0609	0.0744	8.44977	7.75477	7.1667	6.50635	5.38685	4.60121	4.29053	4.03741	3.74855	-2.87616	-0.719041	-4.70122	-0.712305	1.43135		33.3	1.5	2.688	1.197	0.45	0.2	0.32	0.49	0.94	0.94	1.33	1.55	2.03
207	TAN2206_SW-64_18-19cm	2024-05-09 16:11:42	18.5	2.87	4.65	7	11.1	24	41.5	51.4	61.3	74.8	0.00287	0.00465	0.007	0.0111	0.024	0.0415	0.0514	0.0613	0.0748	8.44473	7.74855	7.15843	6.4933	5.38082	4.59074	4.28209	4.02797	3.74082	-2.87634	-0.719085	-4.70392	-0.712714	1.4318		33.6	1.473	2.689	1.191	0.45	0.2	0.32	0.49	0.94	0.94	1.32	1.55	2.02
208	TAN2206_SW-64_18-19cm	2024-05-09 16:12:05	18.5	2.87	4.65	7	11.1	24	41.4	51.3	61.2	74.6	0.00287	0.00465	0.007	0.0111	0.024	0.0414	0.0513	0.0612	0.0746	8.44473	7.74855	7.15843	6.4933	5.38082	4.59423	4.2849	4.03032	3.74468	-2.87353	-0.718383	-4.70005	-0.712129	1.43051		33.5	1.444	2.687	1.184	0.45	0.2	0.32	0.49	0.94	0.94	1.32	1.55	2.02
209	Average of 'TAN2206_SW-64_18-19cm'	2024-05-09 16:08:29	18.5	2.87	4.63	6.96	11	23.9	41.3	51.2	61.1	74.6	0.00287	0.00463	0.00696	0.011	0.0239	0.0413	0.0512	0.0611	0.0746	8.44473	7.75477	7.1667	6.50635	5.38685	4.59771	4.28771	4.03268	3.74468	-2.87898	-0.719746	-4.70005	-0.712129	1.43188		33.4	1.476	2.69	1.193	0.45	0.2	0.32	0.49	0.94	0.94	1.33	1.55	2.03
210	TAN2206_SW-64_19-20cm	2024-05-09 16:20:22	19.5	2.58	4.04	5.97	9.38	21.7	39.4	49.8	60	74.2	0.00258	0.00404	0.00597	0.00938	0.0217	0.0394	0.0498	0.06	0.0742	8.59841	7.95143	7.38805	6.7362	5.52616	4.66566	4.32771	4.05889	3.75244	-3.06034	-0.765086	-4.84598	-0.734239	1.49932		32.1	1.785	2.798	1.306	0.62	0.25	0.39	0.6	1.11	1.11	1.56	1.84	2.4
211	TAN2206_SW-64_19-20cm	2024-05-09 16:20:48	19.5	2.58	4.04	5.98	9.38	21.6	39.4	49.7	59.9	74.2	0.00258	0.00404	0.00598	0.00938	0.0216	0.0394	0.0497	0.0599	0.0742	8.59841	7.95143	7.38564	6.7362	5.53282	4.66566	4.33061	4.0613	3.75244	-3.05503	-0.763757	-4.84598	-0.734239	1.498		32	1.772	2.795	1.304	0.61	0.24	0.39	0.59	1.11	1.11	1.56	1.84	2.4
212	TAN2206_SW-64_19-20cm	2024-05-09 16:21:12	19.5	2.58	4.05	5.99	9.38	21.6	39.4	49.7	60	74.3	0.00258	0.00405	0.00599	0.00938	0.0216	0.0394	0.0497	0.06	0.0743	8.59841	7.94786	7.38323	6.7362	5.53282	4.66566	4.33061	4.05889	3.75049	-3.05262	-0.763154	-4.84792	-0.734533	1.49769		32	1.792	2.794	1.309	0.6	0.24	0.39	0.59	1.11	1.11	1.56	1.83	2.4
213	TAN2206_SW-64_19-20cm	2024-05-09 16:21:36	19.5	2.59	4.06	6.01	9.43	21.7	39.6	50	60.3	74.6	0.00259	0.00406	0.00601	0.00943	0.0217	0.0396	0.05	0.0603	0.0746	8.59283	7.9443	7.37842	6.72853	5.52616	4.65836	4.32193	4.0517	3.74468	-3.05649	-0.764123	-4.84815	-0.734568	1.49869		32.2	1.774	2.796	1.305	0.61	0.24	0.39	0.59	1.1	1.1	1.55	1.82	2.38
214	TAN2206_SW-64_19-20cm	2024-05-09 16:22:00	19.5	2.59	4.06	6.02	9.44	21.7	39.5	49.8	60.1	74.5	0.00259	0.00406	0.00602	0.00944	0.0217	0.0395	0.0498	0.0601	0.0745	8.59283	7.9443	7.37602	6.727	5.52616	4.662	4.32771	4.05649	3.74662	-3.04831	-0.762078	-4.84622	-0.734275	1.49635		32	1.814	2.793	1.313	0.6	0.24	0.39	0.59	1.1	1.1	1.55	1.82	2.38
215	TAN2206_SW-64_19-20cm	2024-05-09 16:22:24	19.5	2.59	4.07	6.03	9.45	21.7	39.5	49.9	60.3	74.6	0.00259	0.00407	0.00603	0.00945	0.0217	0.0395	0.0499	0.0603	0.0746	8.59283	7.94076	7.37363	6.72547	5.52616	4.662	4.32482	4.0517	3.74468	-3.04881	-0.762202	-4.84815	-0.734568	1.49677		32	1.812	2.794	1.313	0.6	0.24	0.39	0.59	1.1	1.1	1.55	1.82	2.38
216	TAN2206_SW-64_19-20cm	2024-05-09 16:22:47	19.5	2.6	4.08	6.05	9.49	21.8	39.6	50	60.3	74.5	0.0026	0.00408	0.00605	0.00949	0.0218	0.0396	0.05	0.0603	0.0745	8.58727	7.93722	7.36885	6.71938	5.51953	4.65836	4.32193	4.0517	3.74662	-3.04692	-0.76173	-4.84066	-0.733433	1.49516		32.3	1.766	2.792	1.3	0.6	0.24	0.39	0.59	1.1	1.09	1.54	1.81	2.36
217	TAN2206_SW-64_19-20cm	2024-05-09 16:23:13	19.5	2.6	4.08	6.05	9.5	21.8	39.6	50	60.3	74.6	0.0026	0.00408	0.00605	0.0095	0.0218	0.0396	0.05	0.0603	0.0746	8.58727	7.93722	7.36885	6.71786	5.51953	4.65836	4.32193	4.0517	3.74468	-3.04692	-0.76173	-4.84259	-0.733726	1.49546		32.1	1.802	2.792	1.31	0.6	0.24	0.39	0.59	1.1	1.09	1.54	1.81	2.36
218	TAN2206_SW-64_19-20cm	2024-05-09 16:23:37	19.5	2.6	4.08	6.06	9.51	21.8	39.6	50	60.3	74.5	0.0026	0.00408	0.00606	0.00951	0.0218	0.0396	0.05	0.0603	0.0745	8.58727	7.93722	7.36647	6.71634	5.51953	4.65836	4.32193	4.0517	3.74662	-3.04454	-0.761135	-4.84066	-0.733433	1.49457		32.1	1.778	2.791	1.303	0.6	0.24	0.39	0.59	1.1	1.09	1.54	1.81	2.36
219	TAN2206_SW-64_19-20cm	2024-05-09 16:24:01	19.5	2.59	4.08	6.04	9.48	21.8	39.5	49.8	60.1	74.3	0.00259	0.00408	0.00604	0.00948	0.0218	0.0395	0.0498	0.0601	0.0743	8.59283	7.93722	7.37124	6.7209	5.51953	4.662	4.32771	4.05649	3.75049	-3.04353	-0.760881	-4.84234	-0.733688	1.49457		32.1	1.779	2.789	1.303	0.6	0.24	0.39	0.59	1.1	1.1	1.54	1.81	2.37
220	Average of 'TAN2206_SW-64_19-20cm'	2024-05-09 16:20:22	19.5	2.59	4.06	6.02	9.44	21.7	39.5	49.9	60.2	74.4	0.00259	0.00406	0.00602	0.00944	0.0217	0.0395	0.0499	0.0602	0.0744	8.59283	7.9443	7.37602	6.727	5.52616	4.662	4.32482	4.05409	3.74855	-3.0512	-0.762801	-4.84428	-0.733982	1.49678		32.1	1.788	2.793	1.307	0.61	0.24	0.39	0.59	1.1	1.1	1.55	1.82	2.38
221	TAN2206_SW-64_20-21cm	2024-05-09 16:31:29	20.5	2.61	4.07	5.98	9.33	22	40.7	51.6	62.6	77.7	0.00261	0.00407	0.00598	0.00933	0.022	0.0407	0.0516	0.0626	0.0777	8.58173	7.94076	7.38564	6.74391	5.50635	4.61883	4.27649	3.99769	3.68594	-3.10915	-0.777288	-4.89579	-0.741787	1.51908		33.4	2.043	2.83	1.364	0.56	0.23	0.37	0.58	1.1	1.1	1.56	1.85	2.42
222	TAN2206_SW-64_20-21cm	2024-05-09 16:31:54	20.5	2.62	4.07	5.98	9.33	22	40.7	51.5	62.3	76.9	0.00262	0.00407	0.00598	0.00933	0.022	0.0407	0.0515	0.0623	0.0769	8.57622	7.94076	7.38564	6.74391	5.50635	4.61883	4.27928	4.00462	3.70087	-3.10636	-0.776589	-4.87534	-0.738689	1.51528		33.6	1.686	2.822	1.3	0.55	0.23	0.37	0.58	1.1	1.1	1.56	1.84	2.42
223	TAN2206_SW-64_20-21cm	2024-05-09 16:32:19	20.5	2.62	4.09	6	9.38	22.1	40.8	51.6	62.5	77.1	0.00262	0.00409	0.006	0.00938	0.0221	0.0408	0.0516	0.0625	0.0771	8.57622	7.93368	7.38082	6.7362	5.49981	4.61529	4.27649	4	3.69713	-3.10434	-0.776084	-4.87909	-0.739256	1.51534		33.7	1.673	2.822	1.296	0.55	0.23	0.37	0.58	1.09	1.1	1.55	1.83	2.41
224	TAN2206_SW-64_20-21cm	2024-05-09 16:32:44	20.5	2.63	4.1	6.03	9.42	22.1	40.9	51.7	62.6	77.5	0.00263	0.0041	0.00603	0.00942	0.0221	0.0409	0.0517	0.0626	0.0775	8.57072	7.93016	7.37363	6.73006	5.49981	4.61176	4.27369	3.99769	3.68966	-3.09993	-0.774984	-4.88106	-0.739555	1.51454		33.6	1.969	2.822	1.346	0.55	0.23	0.37	0.57	1.09	1.09	1.55	1.83	2.4
225	TAN2206_SW-64_20-21cm	2024-05-09 16:33:09	20.5	2.63	4.11	6.04	9.44	22.1	40.9	51.7	62.7	77.6	0.00263	0.00411	0.00604	0.00944	0.0221	0.0409	0.0517	0.0627	0.0776	8.57072	7.92665	7.37124	6.727	5.49981	4.61176	4.27369	3.99539	3.6878	-3.09754	-0.774386	-4.88292	-0.739837	1.51422		33.6	1.978	2.822	1.348	0.54	0.23	0.37	0.57	1.09	1.09	1.54	1.82	2.39
226	TAN2206_SW-64_20-21cm	2024-05-09 16:33:33	20.5	2.63	4.11	6.04	9.44	22.1	40.9	51.7	62.6	77.2	0.00263	0.00411	0.00604	0.00944	0.0221	0.0409	0.0517	0.0626	0.0772	8.57072	7.92665	7.37124	6.727	5.49981	4.61176	4.27369	3.99769	3.69526	-3.09754	-0.774386	-4.87547	-0.738707	1.51309		33.7	1.666	2.819	1.293	0.54	0.23	0.37	0.58	1.09	1.09	1.54	1.82	2.39
227	TAN2206_SW-64_20-21cm	2024-05-09 16:33:58	20.5	2.63	4.11	6.05	9.46	22.2	40.9	51.7	62.6	77.3	0.00263	0.00411	0.00605	0.00946	0.0222	0.0409	0.0517	0.0626	0.0773	8.57072	7.92665	7.36885	6.72394	5.4933	4.61176	4.27369	3.99769	3.69339	-3.09516	-0.773789	-4.87733	-0.73899	1.51278		33.7	1.66	2.818	1.293	0.55	0.23	0.37	0.57	1.09	1.09	1.54	1.82	2.38
228	TAN2206_SW-64_20-21cm	2024-05-09 16:34:24	20.5	2.63	4.11	6.05	9.47	22.2	41	51.8	62.7	77.5	0.00263	0.00411	0.00605	0.00947	0.0222	0.041	0.0518	0.0627	0.0775	8.57072	7.92665	7.36885	6.72242	5.4933	4.60823	4.2709	3.99539	3.68966	-3.09795	-0.774486	-4.88106	-0.739555	1.51404		33.7	1.936	2.821	1.337	0.55	0.23	0.37	0.57	1.09	1.09	1.54	1.82	2.38
229	TAN2206_SW-64_20-21cm	2024-05-09 16:34:49	20.5	2.63	4.12	6.06	9.48	22.2	40.9	51.7	62.5	77.1	0.00263	0.00412	0.00606	0.00948	0.0222	0.0409	0.0517	0.0625	0.0771	8.57072	7.92314	7.36647	6.7209	5.4933	4.61176	4.27369	4	3.69713	-3.09277	-0.773194	-4.8736	-0.738424	1.51162		33.7	1.666	2.816	1.292	0.55	0.23	0.37	0.57	1.08	1.09	1.54	1.81	2.38
230	TAN2206_SW-64_20-21cm	2024-05-09 16:35:14	20.5	2.64	4.12	6.08	9.52	22.3	41	51.7	62.5	77	0.00264	0.00412	0.00608	0.00952	0.0223	0.041	0.0517	0.0625	0.077	8.56525	7.92314	7.36171	6.71482	5.48681	4.60823	4.27369	4	3.699	-3.08802	-0.772005	-4.86625	-0.73731	1.50932		33.8	1.623	2.814	1.28	0.55	0.23	0.37	0.57	1.08	1.08	1.53	1.81	2.37
231	Average of 'TAN2206_SW-64_20-21cm'	2024-05-09 16:31:29	20.5	2.63	4.1	6.03	9.43	22.1	40.9	51.7	62.6	77.3	0.00263	0.0041	0.00603	0.00943	0.0221	0.0409	0.0517	0.0626	0.0773	8.57072	7.93016	7.37363	6.72853	5.49981	4.61176	4.27369	3.99769	3.69339	-3.09993	-0.774984	-4.87733	-0.73899	1.51397		33.7	1.794	2.821	1.315	0.55	0.23	0.37	0.57	1.09	1.09	1.55	1.82	2.39
232	TAN2206_SW-64_21-22cm	2024-05-09 16:43:54	21.5	5.27	10.2	16.5	24.2	42.5	67.1	81.8	96.4	118	0.00527	0.0102	0.0165	0.0242	0.0425	0.0671	0.0818	0.0964	0.118	7.56798	6.61529	5.92139	5.36885	4.55639	3.89754	3.61176	3.37482	3.08314	-2.30963	-0.577409	-4.48484	-0.679521	1.25693		50.1	1.888	2.508	1.2	0.15	0.1	0.16	0.23	0.42	0.42	0.58	0.66	0.85
233	TAN2206_SW-64_21-22cm	2024-05-09 16:44:20	21.5	5.26	10.2	16.5	24.1	42.5	67.1	81.8	96.4	118	0.00526	0.0102	0.0165	0.0241	0.0425	0.0671	0.0818	0.0964	0.118	7.57072	6.61529	5.92139	5.37482	4.55639	3.89754	3.61176	3.37482	3.08314	-2.30963	-0.577409	-4.48758	-0.679936	1.25735		50.2	1.843	2.51	1.19	0.15	0.1	0.16	0.23	0.42	0.42	0.58	0.66	0.85
234	TAN2206_SW-64_21-22cm	2024-05-09 16:44:47	21.5	5.29	10.3	16.6	24.2	42.7	67.3	81.9	96.3	117	0.00529	0.0103	0.0166	0.0242	0.0427	0.0673	0.0819	0.0963	0.117	7.56252	6.60121	5.91267	5.36885	4.54962	3.89325	3.60999	3.37632	3.09542	-2.30268	-0.57567	-4.4671	-0.676833	1.2525		50.4	1.18	2.501	1.06	0.15	0.1	0.16	0.23	0.42	0.42	0.58	0.65	0.84
235	TAN2206_SW-64_21-22cm	2024-05-09 16:45:11	21.5	5.32	10.3	16.6	24.3	42.8	67.4	82.1	96.8	118	0.00532	0.0103	0.0166	0.0243	0.0428	0.0674	0.0821	0.0968	0.118	7.55436	6.60121	5.91267	5.3629	4.54625	3.89111	3.60647	3.36885	3.08314	-2.3062	-0.57655	-4.47122	-0.677457	1.25401		50.4	1.98	2.506	1.216	0.15	0.1	0.16	0.22	0.42	0.41	0.57	0.65	0.83
236	TAN2206_SW-64_21-22cm	2024-05-09 16:45:36	21.5	5.35	10.4	16.7	24.4	43	68	82.9	97.8	120	0.00535	0.0104	0.0167	0.0244	0.043	0.068	0.0829	0.0978	0.12	7.54625	6.58727	5.90401	5.35698	4.53952	3.87832	3.59248	3.35402	3.05889	-2.31152	-0.577881	-4.48735	-0.679902	1.25778		50.6	2.031	2.512	1.235	0.14	0.1	0.15	0.22	0.41	0.41	0.57	0.64	0.83
237	TAN2206_SW-64_21-22cm	2024-05-09 16:46:02	21.5	5.33	10.4	16.7	24.3	42.8	67.7	82.6	97.6	120	0.00533	0.0104	0.0167	0.0243	0.0428	0.0677	0.0826	0.0976	0.12	7.55165	6.58727	5.90401	5.3629	4.54625	3.8847	3.59771	3.35698	3.05889	-2.30629	-0.576573	-4.49276	-0.68072	1.25729		50.3	2.04	2.511	1.24	0.15	0.1	0.15	0.22	0.42	0.41	0.57	0.65	0.83
238	TAN2206_SW-64_21-22cm	2024-05-09 16:46:27	21.5	5.31	10.3	16.6	24.3	42.7	67.2	81.8	96.3	117	0.00531	0.0103	0.0166	0.0243	0.0427	0.0672	0.0818	0.0963	0.117	7.55707	6.60121	5.91267	5.3629	4.54962	3.89539	3.61176	3.37632	3.09542	-2.30092	-0.575229	-4.46165	-0.676008	1.25124		50.3	1.206	2.498	1.066	0.15	0.1	0.16	0.23	0.42	0.41	0.57	0.65	0.84
239	TAN2206_SW-64_21-22cm	2024-05-09 16:46:51	21.5	5.32	10.3	16.6	24.3	42.8	67.4	82.2	97	119	0.00532	0.0103	0.0166	0.0243	0.0428	0.0674	0.0822	0.097	0.119	7.55436	6.60121	5.91267	5.3629	4.54625	3.89111	3.60472	3.36587	3.07097	-2.30796	-0.576989	-4.48339	-0.679302	1.25629		50.2	1.903	2.506	1.206	0.15	0.1	0.16	0.22	0.42	0.41	0.57	0.65	0.83
240	TAN2206_SW-64_21-22cm	2024-05-09 16:47:17	21.5	5.32	10.3	16.6	24.3	42.7	66.9	81.2	95.3	115	0.00532	0.0103	0.0166	0.0243	0.0427	0.0669	0.0812	0.0953	0.115	7.55436	6.60121	5.91267	5.3629	4.54962	3.90185	3.62238	3.39138	3.12029	-2.2903	-0.572574	-4.43406	-0.671828	1.2444		50.6	0.976	2.489	1.004	0.15	0.1	0.16	0.23	0.42	0.41	0.57	0.65	0.83
241	TAN2206_SW-64_21-22cm	2024-05-09 16:47:42	21.5	5.35	10.4	16.7	24.4	42.9	67.6	82.3	97	118	0.00535	0.0104	0.0167	0.0244	0.0429	0.0676	0.0823	0.097	0.118	7.54625	6.58727	5.90401	5.35698	4.54288	3.88683	3.60296	3.36587	3.08314	-2.30104	-0.575261	-4.4631	-0.676228	1.25149		50.5	1.526	2.502	1.139	0.15	0.1	0.16	0.22	0.42	0.41	0.57	0.64	0.83
242	Average of 'TAN2206_SW-64_21-22cm'	2024-05-09 16:43:54	21.5	5.31	10.3	16.6	24.3	42.7	67.4	82	96.7	118	0.00531	0.0103	0.0166	0.0243	0.0427	0.0674	0.082	0.0967	0.118	7.55707	6.60121	5.91267	5.3629	4.54962	3.89111	3.60823	3.37034	3.08314	-2.30444	-0.57611	-4.47393	-0.677868	1.25398		50.4	1.695	2.504	1.161	0.15	0.1	0.16	0.23	0.42	0.41	0.57	0.65	0.84
243	TAN2206_SW-64_22-23cm	2024-05-10 10:14:06	22.5	3.45	6.03	9.63	16	35.4	62.3	78.8	96.2	123	0.00345	0.00603	0.00963	0.016	0.0354	0.0623	0.0788	0.0962	0.123	8.17919	7.37363	6.69825	5.96578	4.82011	4.00462	3.66566	3.37782	3.02327	-3.03259	-0.758147	-5.15592	-0.7812	1.53935		47.2	4.347	2.915	1.736	0.3	0.16	0.25	0.38	0.72	0.71	0.99	1.14	1.47
244	TAN2206_SW-64_22-23cm	2024-05-10 10:14:32	22.5	3.44	6.01	9.58	15.9	35.2	61.8	78	94.9	120	0.00344	0.00601	0.00958	0.0159	0.0352	0.0618	0.078	0.0949	0.12	8.18338	7.37842	6.70576	5.97483	4.82828	4.01625	3.68038	3.39745	3.05889	-3.02538	-0.756344	-5.12448	-0.776437	1.53278		47.3	3.187	2.898	1.546	0.3	0.16	0.26	0.39	0.72	0.71	0.99	1.14	1.47
245	TAN2206_SW-64_22-23cm	2024-05-10 10:14:55	22.5	3.46	6.05	9.66	16	35.4	62.3	78.8	96	122	0.00346	0.00605	0.00966	0.016	0.0354	0.0623	0.0788	0.096	0.122	8.17501	7.36885	6.69376	5.96578	4.82011	4.00462	3.66566	3.38082	3.03505	-3.0281	-0.757025	-5.13997	-0.778783	1.53581		47.4	3.427	2.905	1.598	0.29	0.16	0.25	0.38	0.72	0.71	0.98	1.13	1.46
246	TAN2206_SW-64_22-23cm	2024-05-10 10:15:19	22.5	3.45	6.03	9.6	15.9	35.3	61.9	78	94.8	120	0.00345	0.00603	0.0096	0.0159	0.0353	0.0619	0.078	0.0948	0.12	8.17919	7.37363	6.70275	5.97483	4.82419	4.01392	3.68038	3.39897	3.05889	-3.02237	-0.755592	-5.12029	-0.775802	1.53139		47.4	2.984	2.894	1.509	0.29	0.16	0.25	0.39	0.72	0.71	0.99	1.13	1.47
247	TAN2206_SW-64_22-23cm	2024-05-10 10:15:42	22.5	3.46	6.04	9.62	16	35.2	61.9	78	94.8	120	0.00346	0.00604	0.00962	0.016	0.0352	0.0619	0.078	0.0948	0.12	8.17501	7.37124	6.69975	5.96578	4.82828	4.01392	3.68038	3.39897	3.05889	-3.01937	-0.754841	-5.11612	-0.775169	1.53001		47.3	3.157	2.894	1.539	0.29	0.16	0.25	0.38	0.72	0.71	0.99	1.13	1.46
248	TAN2206_SW-64_22-23cm	2024-05-10 10:16:07	22.5	3.46	6.05	9.66	16	35.2	61.6	77.5	94.1	118	0.00346	0.00605	0.00966	0.016	0.0352	0.0616	0.0775	0.0941	0.118	8.17501	7.36885	6.69376	5.96578	4.82828	4.02093	3.68966	3.40966	3.08314	-3.0041	-0.751025	-5.09187	-0.771496	1.52252		47.3	2.511	2.88	1.43	0.29	0.16	0.25	0.38	0.72	0.71	0.98	1.13	1.46
249	TAN2206_SW-64_22-23cm	2024-05-10 10:16:31	22.5	3.47	6.07	9.69	16.1	35.4	62.2	78.5	95.5	121	0.00347	0.00607	0.00969	0.0161	0.0354	0.0622	0.0785	0.0955	0.121	8.17085	7.36409	6.68929	5.9568	4.82011	4.00694	3.67116	3.38836	3.04692	-3.01812	-0.754531	-5.12393	-0.776353	1.53088		47.3	3.037	2.895	1.525	0.29	0.16	0.25	0.38	0.72	0.71	0.98	1.12	1.45
250	TAN2206_SW-64_22-23cm	2024-05-10 10:16:54	22.5	3.47	6.08	9.7	16.1	35.5	62.1	78.3	95.2	120	0.00347	0.00608	0.0097	0.0161	0.0355	0.0621	0.0783	0.0952	0.12	8.17085	7.36171	6.6878	5.9568	4.81604	4.00926	3.67484	3.39289	3.05889	-3.01296	-0.753239	-5.11195	-0.774539	1.52778		47.5	3.076	2.891	1.526	0.29	0.16	0.25	0.38	0.71	0.71	0.98	1.12	1.45
251	TAN2206_SW-64_22-23cm	2024-05-10 10:17:18	22.5	3.46	6.06	9.66	16	35.3	61.8	77.8	94.4	118	0.00346	0.00606	0.00966	0.016	0.0353	0.0618	0.0778	0.0944	0.118	8.17501	7.36647	6.69376	5.96578	4.82419	4.01625	3.68409	3.40507	3.08314	-3.00968	-0.752419	-5.09187	-0.771496	1.52391		47.4	2.418	2.882	1.414	0.29	0.16	0.25	0.38	0.72	0.71	0.98	1.13	1.46
252	TAN2206_SW-64_22-23cm	2024-05-10 10:17:41	22.5	3.47	6.07	9.69	16.1	35.4	62	78	94.7	119	0.00347	0.00607	0.00969	0.0161	0.0354	0.062	0.078	0.0947	0.119	8.17085	7.36409	6.68929	5.9568	4.82011	4.01159	3.68038	3.40049	3.07097	-3.00891	-0.752226	-5.09988	-0.772709	1.52494		47.5	2.422	2.884	1.416	0.29	0.16	0.25	0.38	0.72	0.71	0.98	1.12	1.45
253	Average of 'TAN2206_SW-64_22-23cm'	2024-05-10 10:14:06	22.5	3.46	6.05	9.65	16	35.3	62	78.2	95.1	120	0.00346	0.00605	0.00965	0.016	0.0353	0.062	0.0782	0.0951	0.12	8.17501	7.36885	6.69526	5.96578	4.82419	4.01159	3.67669	3.39441	3.05889	-3.01857	-0.754642	-5.11612	-0.775169	1.52981		47.4	3.119	2.894	1.532	0.29	0.16	0.25	0.38	0.72	0.71	0.98	1.13	1.46
254	TAN2206_SW-64_23-24cm	2024-05-10 10:31:15	23.5	10.8	21.2	28.1	36	56.3	84.4	101	118	141	0.0108	0.0212	0.0281	0.036	0.0563	0.0844	0.101	0.118	0.141	6.53282	5.55979	5.15329	4.79586	4.15072	3.56661	3.30757	3.08314	2.82623	-1.84571	-0.461428	-3.70659	-0.561605	1.02303		60.8	1.589	2.197	1.104	6e-05	0.02	0.09	0.12	0.22	0.21	0.28	0.3	0.39
255	TAN2206_SW-64_23-24cm	2024-05-10 10:31:40	23.5	10.9	21.3	28.1	36.1	56.6	84.9	102	119	142	0.0109	0.0213	0.0281	0.0361	0.0566	0.0849	0.102	0.119	0.142	6.51953	5.553	5.15329	4.79186	4.14305	3.55809	3.29336	3.07097	2.81604	-1.85993	-0.464982	-3.70349	-0.561135	1.02612		61.1	1.555	2.201	1.097	6e-05	0.02	0.09	0.13	0.22	0.21	0.28	0.3	0.39
256	TAN2206_SW-64_23-24cm	2024-05-10 10:32:04	23.5	10.8	21.1	28	36	56.3	84.1	101	117	140	0.0108	0.0211	0.028	0.036	0.0563	0.0841	0.101	0.117	0.14	6.53282	5.56661	5.15843	4.79586	4.15072	3.57175	3.30757	3.09542	2.8365	-1.85086	-0.462714	-3.69632	-0.560049	1.02276		61	1.458	2.195	1.064	6e-05	0.02	0.09	0.13	0.22	0.21	0.28	0.3	0.39
257	TAN2206_SW-64_23-24cm	2024-05-10 10:32:29	23.5	10.8	21.2	28.1	36.1	56.5	84.4	101	117	139	0.0108	0.0212	0.0281	0.0361	0.0565	0.0844	0.101	0.117	0.139	6.53282	5.55979	5.15329	4.79186	4.14561	3.56661	3.30757	3.09542	2.84684	-1.84571	-0.461428	-3.68598	-0.558482	1.01991		61.5	0.87	2.189	0.937	6e-05	0.02	0.09	0.13	0.22	0.21	0.28	0.3	0.38
258	TAN2206_SW-64_23-24cm	2024-05-10 10:32:55	23.5	11	21.4	28.3	36.2	56.7	84.7	101	117	139	0.011	0.0214	0.0283	0.0362	0.0567	0.0847	0.101	0.117	0.139	6.50635	5.54625	5.14305	4.78787	4.14051	3.56149	3.30757	3.09542	2.84684	-1.83548	-0.45887	-3.65951	-0.554471	1.01334		61.6	0.791	2.185	0.92	6e-05	0.02	0.09	0.12	0.22	0.21	0.28	0.3	0.38
259	TAN2206_SW-64_23-24cm	2024-05-10 10:33:18	23.5	10.8	21.2	28.1	36	56.3	83.9	99.9	116	138	0.0108	0.0212	0.0281	0.036	0.0563	0.0839	0.0999	0.116	0.138	6.53282	5.55979	5.15329	4.79586	4.15072	3.57519	3.32337	3.1078	2.85726	-1.82991	-0.457479	-3.67557	-0.556904	1.01438		61.5	0.77	2.182	0.906	6e-05	0.02	0.09	0.13	0.22	0.21	0.28	0.3	0.38
260	TAN2206_SW-64_23-24cm	2024-05-10 10:33:42	23.5	10.8	21.2	28.1	36	56.2	83.8	99.7	116	137	0.0108	0.0212	0.0281	0.036	0.0562	0.0838	0.0997	0.116	0.137	6.53282	5.55979	5.15329	4.79586	4.15329	3.57691	3.32626	3.1078	2.86775	-1.82702	-0.456756	-3.66507	-0.555314	1.01207		61.3	0.757	2.182	0.902	6e-05	0.02	0.09	0.13	0.22	0.21	0.28	0.3	0.39
261	TAN2206_SW-64_23-24cm	2024-05-10 10:34:05	23.5	10.6	21	27.9	35.8	55.9	83.3	99	115	136	0.0106	0.021	0.0279	0.0358	0.0559	0.0833	0.099	0.115	0.136	6.55979	5.57347	5.16359	4.8039	4.16101	3.58554	3.33643	3.12029	2.87832	-1.82716	-0.456791	-3.68147	-0.557799	1.01459		61.2	0.761	2.182	0.898	6e-05	0.02	0.1	0.13	0.22	0.21	0.28	0.3	0.39
262	TAN2206_SW-64_23-24cm	2024-05-10 10:34:30	23.5	10.7	21.1	28	35.8	55.9	83.2	98.9	115	136	0.0107	0.0211	0.028	0.0358	0.0559	0.0832	0.0989	0.115	0.136	6.54625	5.56661	5.15843	4.8039	4.16101	3.58727	3.33789	3.12029	2.87832	-1.82054	-0.455136	-3.66792	-0.555746	1.01088		61	0.778	2.179	0.904	6e-05	0.02	0.1	0.13	0.22	0.21	0.28	0.3	0.39
263	TAN2206_SW-64_23-24cm	2024-05-10 10:34:53	23.5	10.9	21.3	28.2	36.1	56.2	83.6	99.4	115	137	0.0109	0.0213	0.0282	0.0361	0.0562	0.0836	0.0994	0.115	0.137	6.51953	5.553	5.14816	4.79186	4.15329	3.58035	3.33061	3.12029	2.86775	-1.81755	-0.454388	-3.65178	-0.553299	1.00769		61.2	0.773	2.175	0.904	6e-05	0.02	0.09	0.13	0.22	0.21	0.28	0.3	0.38
264	Average of 'TAN2206_SW-64_23-24cm'	2024-05-10 10:31:15	23.5	10.8	21.2	28.1	36	56.3	84	100	117	139	0.0108	0.0212	0.0281	0.036	0.0563	0.084	0.1	0.117	0.139	6.53282	5.55979	5.15329	4.79586	4.15072	3.57347	3.32193	3.09542	2.84684	-1.83136	-0.457839	-3.68598	-0.558482	1.01632		61.2	1.058	2.187	0.972	6e-05	0.02	0.09	0.13	0.22	0.21	0.28	0.3	0.38
265	TAN2206_SW-64_24-25cm	2024-05-10 10:42:08	24.5	31.6	39.3	46.4	55.6	81.9	120	143	166	201	0.0316	0.0393	0.0464	0.0556	0.0819	0.12	0.143	0.166	0.201	4.98393	4.66933	4.42973	4.16877	3.60999	3.05889	2.80591	2.59074	2.31473	-1.62382	-0.405955	-2.6692	-0.404424	0.810379		82.7	2.225	1.792	1.314	0	0	0	0	0	0	0	0	0
266	TAN2206_SW-64_24-25cm	2024-05-10 10:42:32	24.5	31.3	39	46.2	55.4	81.5	119	141	163	196	0.0313	0.039	0.0462	0.0554	0.0815	0.119	0.141	0.163	0.196	4.99769	4.68038	4.43596	4.17397	3.61706	3.07097	2.82623	2.61706	2.35107	-1.60973	-0.402433	-2.64662	-0.401003	0.803435		82.8	1.803	1.791	1.219	0	0	0	0	0	0	0	0	0
267	TAN2206_SW-64_24-25cm	2024-05-10 10:42:55	24.5	31.3	39	46.1	55.3	81.3	118	140	162	193	0.0313	0.039	0.0461	0.0553	0.0813	0.118	0.14	0.162	0.193	4.99769	4.68038	4.43909	4.17658	3.6206	3.08314	2.8365	2.62593	2.37333	-1.60259	-0.400647	-2.62437	-0.397631	0.798278		82.9	1.286	1.785	1.11	0	0	0	0	0	0	0	0	0
268	TAN2206_SW-64_24-25cm	2024-05-10 10:43:19	24.5	31.3	39.1	46.2	55.5	81.7	119	142	164	197	0.0313	0.0391	0.0462	0.0555	0.0817	0.119	0.142	0.164	0.197	4.99769	4.67669	4.43596	4.17137	3.61352	3.07097	2.81604	2.60823	2.34373	-1.61993	-0.404982	-2.65396	-0.402115	0.807097		83.1	1.736	1.793	1.206	0	0	0	0	0	0	0	0	0
269	TAN2206_SW-64_24-25cm	2024-05-10 10:43:44	24.5	31.3	39	46.1	55.3	81.2	118	140	162	194	0.0313	0.039	0.0461	0.0553	0.0812	0.118	0.14	0.162	0.194	4.99769	4.68038	4.43909	4.17658	3.62238	3.08314	2.8365	2.62593	2.36587	-1.60259	-0.400647	-2.63182	-0.398761	0.799408		82.8	1.741	1.786	1.198	0	0	0	0	0	0	0	0	0
270	TAN2206_SW-64_24-25cm	2024-05-10 10:44:08	24.5	31.4	39.1	46.3	55.5	81.5	119	141	163	196	0.0314	0.0391	0.0463	0.0555	0.0815	0.119	0.141	0.163	0.196	4.99309	4.67669	4.43284	4.17137	3.61706	3.07097	2.82623	2.61706	2.35107	-1.60661	-0.401653	-2.64202	-0.400306	0.801958		82.8	1.759	1.79	1.208	0	0	0	0	0	0	0	0	0
271	TAN2206_SW-64_24-25cm	2024-05-10 10:44:33	24.5	31.3	39	46.1	55.3	81.3	119	141	163	196	0.0313	0.039	0.0461	0.0553	0.0813	0.119	0.141	0.163	0.196	4.99769	4.68038	4.43909	4.17658	3.6206	3.07097	2.82623	2.61706	2.35107	-1.61286	-0.403214	-2.64662	-0.401003	0.804217		82.5	1.851	1.792	1.232	0	0	0	0	0	0	0	0	0
272	TAN2206_SW-64_24-25cm	2024-05-10 10:44:56	24.5	31.4	39.2	46.3	55.6	81.9	120	143	168	203	0.0314	0.0392	0.0463	0.0556	0.0819	0.12	0.143	0.168	0.203	4.99309	4.673	4.43284	4.16877	3.60999	3.05889	2.80591	2.57347	2.30045	-1.62693	-0.406733	-2.69264	-0.407976	0.814709		82.5	2.428	1.807	1.359	0	0	0	0	0	0	0	0	0
273	TAN2206_SW-64_24-25cm	2024-05-10 10:45:20	24.5	31.2	38.9	46	55.1	80.9	118	139	161	191	0.0312	0.0389	0.046	0.0551	0.0809	0.118	0.139	0.161	0.191	5.00231	4.68409	4.44222	4.1818	3.62772	3.08314	2.84684	2.63487	2.38836	-1.59538	-0.398845	-2.61395	-0.396054	0.794899		82.5	1.296	1.781	1.107	0	0	0	0	0	0	0	0	0
274	TAN2206_SW-64_24-25cm	2024-05-10 10:45:43	24.5	31.2	38.8	45.9	55.1	80.9	118	140	162	194	0.0312	0.0388	0.0459	0.0551	0.0809	0.118	0.14	0.162	0.194	5.00231	4.6878	4.44536	4.1818	3.62772	3.08314	2.8365	2.62593	2.36587	-1.60886	-0.402215	-2.63644	-0.39946	0.801676		82.3	1.696	1.788	1.19	0	0	0	0	0	0	0	0	0
275	Average of 'TAN2206_SW-64_24-25cm'	2024-05-10 10:42:08	24.5	31.3	39	46.2	55.4	81.4	119	141	163	196	0.0313	0.039	0.0462	0.0554	0.0814	0.119	0.141	0.163	0.196	4.99769	4.68038	4.43596	4.17397	3.61883	3.07097	2.82623	2.61706	2.35107	-1.60973	-0.402433	-2.64662	-0.401003	0.803435		82.7	1.836	1.791	1.223	0	0	0	0	0	0	0	0	0
276	TAN2206_SW-64_25-26cm	2024-05-10 10:53:05	25.5	35.7	49.2	61.3	76.9	118	174	205	235	275	0.0357	0.0492	0.0613	0.0769	0.118	0.174	0.205	0.235	0.275	4.80793	4.3452	4.02797	3.70087	3.08314	2.52284	2.2863	2.08927	1.8625	-1.74166	-0.435416	-2.94544	-0.446278	0.881694		130	0.438	1.903	0.844	0	0	0	0	0	0	0	0	0
277	TAN2206_SW-64_25-26cm	2024-05-10 10:53:29	25.5	35.7	49	60.9	76.4	118	175	208	239	282	0.0357	0.049	0.0609	0.0764	0.118	0.175	0.208	0.239	0.282	4.80793	4.35107	4.03741	3.71028	3.08314	2.51457	2.26534	2.06492	1.82623	-1.77207	-0.443017	-2.9817	-0.451773	0.89479		128	0.584	1.917	0.905	0	0	0	0	0	0	0	0	0
278	TAN2206_SW-64_25-26cm	2024-05-10 10:53:52	25.5	35.3	48.5	60.5	76	117	173	204	234	273	0.0353	0.0485	0.0605	0.076	0.117	0.173	0.204	0.234	0.273	4.82419	4.36587	4.04692	3.71786	3.09542	2.53116	2.29336	2.09542	1.87303	-1.75356	-0.438391	-2.95116	-0.447146	0.885536		129	0.453	1.908	0.851	0	0	0	0	0	0	0	0	0
279	TAN2206_SW-64_25-26cm	2024-05-10 10:54:16	25.5	35.5	48.8	60.8	76.2	117	172	203	233	270	0.0355	0.0488	0.0608	0.0762	0.117	0.172	0.203	0.233	0.27	4.81604	4.35698	4.03978	3.71407	3.09542	2.53952	2.30045	2.1016	1.88897	-1.73934	-0.434834	-2.92707	-0.443495	0.878329		129	0.322	1.899	0.805	0	0	0	0	0	0	0	0	0
280	TAN2206_SW-64_25-26cm	2024-05-10 10:54:41	25.5	35.4	48.7	60.7	76.2	117	173	205	235	274	0.0354	0.0487	0.0607	0.0762	0.117	0.173	0.205	0.235	0.274	4.82011	4.35993	4.04216	3.71407	3.09542	2.53116	2.2863	2.08927	1.86775	-1.75586	-0.438964	-2.95235	-0.447326	0.88629		129	0.46	1.908	0.855	0	0	0	0	0	0	0	0	0
281	TAN2206_SW-64_25-26cm	2024-05-10 10:55:06	25.5	35.2	48.5	60.5	75.9	117	172	204	234	273	0.0352	0.0485	0.0605	0.0759	0.117	0.172	0.204	0.234	0.273	4.82828	4.36587	4.04692	3.71976	3.09542	2.53952	2.29336	2.09542	1.87303	-1.75356	-0.438391	-2.95525	-0.447766	0.886156		128	0.469	1.908	0.857	0	0	0	0	0	0	0	0	0
282	TAN2206_SW-64_25-26cm	2024-05-10 10:55:30	25.5	35.1	48.4	60.4	75.7	117	173	205	235	275	0.0351	0.0484	0.0604	0.0757	0.117	0.173	0.205	0.235	0.275	4.83239	4.36885	4.04931	3.72356	3.09542	2.53116	2.2863	2.08927	1.8625	-1.763	-0.440751	-2.96989	-0.449983	0.890734		128	0.477	1.913	0.867	0	0	0	0	0	0	0	0	0
283	TAN2206_SW-64_25-26cm	2024-05-10 10:55:53	25.5	35.3	48.5	60.6	76	117	173	205	235	274	0.0353	0.0485	0.0606	0.076	0.117	0.173	0.205	0.235	0.274	4.82419	4.36587	4.04454	3.71786	3.09542	2.53116	2.2863	2.08927	1.86775	-1.75823	-0.439559	-2.95644	-0.447945	0.887503		129	0.445	1.91	0.85	0	0	0	0	0	0	0	0	0
284	TAN2206_SW-64_25-26cm	2024-05-10 10:56:17	25.5	35.2	48.5	60.5	75.9	117	172	203	232	270	0.0352	0.0485	0.0605	0.0759	0.117	0.172	0.203	0.232	0.27	4.82828	4.36587	4.04692	3.71976	3.09542	2.53952	2.30045	2.1078	1.88897	-1.74647	-0.436618	-2.93931	-0.44535	0.881968		129	0.328	1.902	0.808	0	0	0	0	0	0	0	0	0
285	TAN2206_SW-64_25-26cm	2024-05-10 10:56:40	25.5	35.1	48.4	60.4	75.8	117	172	204	234	274	0.0351	0.0484	0.0604	0.0758	0.117	0.172	0.204	0.234	0.274	4.83239	4.36885	4.04931	3.72166	3.09542	2.53952	2.29336	2.09542	1.86775	-1.75595	-0.438987	-2.96463	-0.449187	0.888174		128	0.494	1.911	0.868	0	0	0	0	0	0	0	0	0
286	Average of 'TAN2206_SW-64_25-26cm'	2024-05-10 10:53:05	25.5	35.4	48.7	60.7	76.1	117	173	205	235	274	0.0354	0.0487	0.0607	0.0761	0.117	0.173	0.205	0.235	0.274	4.82011	4.35993	4.04216	3.71596	3.09542	2.53116	2.2863	2.08927	1.86775	-1.75586	-0.438964	-2.95235	-0.447326	0.88629		129	0.455	1.908	0.853	0	0	0	0	0	0	0	0	0
287	TAN2206_SW-64_26-27cm	2024-05-10 11:04:29	26.5	14.7	28.2	40.9	57.1	101	161	195	227	269	0.0147	0.0282	0.0409	0.0571	0.101	0.161	0.195	0.227	0.269	6.08804	5.14816	4.61176	4.13037	3.30757	2.63487	2.35845	2.13924	1.89432	-2.2533	-0.563325	-4.19372	-0.635412	1.19874		124	0.421	2.469	0.875	0	0	0.0005	0.06	0.16	0.17	0.23	0.25	0.31
288	TAN2206_SW-64_26-27cm	2024-05-10 11:04:52	26.5	14.8	28.3	41.2	57.5	102	162	196	229	270	0.0148	0.0283	0.0412	0.0575	0.102	0.162	0.196	0.229	0.27	6.07826	5.14305	4.60121	4.12029	3.29336	2.62593	2.35107	2.12658	1.88897	-2.25014	-0.562534	-4.18929	-0.634741	1.19728		125	0.412	2.469	0.873	0	0	0.0005	0.06	0.16	0.17	0.23	0.25	0.31
289	TAN2206_SW-64_26-27cm	2024-05-10 11:05:16	26.5	14.8	28.3	41.2	57.7	102	163	197	229	271	0.0148	0.0283	0.0412	0.0577	0.102	0.163	0.197	0.229	0.271	6.07826	5.14305	4.60121	4.11528	3.29336	2.61706	2.34373	2.12658	1.88364	-2.25748	-0.56437	-4.19462	-0.635549	1.19992		126	0.394	2.472	0.866	0	0	0.0005	0.06	0.16	0.16	0.23	0.25	0.31
290	TAN2206_SW-64_26-27cm	2024-05-10 11:05:40	26.5	14.4	27.9	40.6	56.7	100	160	194	227	269	0.0144	0.0279	0.0406	0.0567	0.1	0.16	0.194	0.227	0.269	6.11779	5.16359	4.62238	4.14051	3.32193	2.64386	2.36587	2.13924	1.89432	-2.25651	-0.564126	-4.22347	-0.639919	1.20405		121	0.541	2.475	0.915	0	0	0.0005	0.07	0.17	0.17	0.23	0.26	0.32
291	TAN2206_SW-64_26-27cm	2024-05-10 11:06:03	26.5	14.7	28.3	41.1	57.4	102	163	198	231	274	0.0147	0.0283	0.0411	0.0574	0.102	0.163	0.198	0.231	0.274	6.08804	5.14305	4.60472	4.12281	3.29336	2.61706	2.33643	2.11404	1.86775	-2.26829	-0.567073	-4.22029	-0.639438	1.20651		123	0.494	2.478	0.906	0	0	0.0005	0.06	0.16	0.17	0.23	0.25	0.31
292	TAN2206_SW-64_26-27cm	2024-05-10 11:06:27	26.5	14.7	28.4	41.2	57.5	101	162	197	230	273	0.0147	0.0284	0.0412	0.0575	0.101	0.162	0.197	0.23	0.273	6.08804	5.13797	4.60121	4.12029	3.30757	2.62593	2.34373	2.12029	1.87303	-2.25748	-0.56437	-4.21501	-0.638638	1.20301		123	0.503	2.475	0.908	0	0	0.0005	0.06	0.16	0.17	0.23	0.25	0.31
293	TAN2206_SW-64_26-27cm	2024-05-10 11:06:55	26.5	14.7	28.3	41.1	57.3	101	161	195	227	269	0.0147	0.0283	0.0411	0.0573	0.101	0.161	0.195	0.227	0.269	6.08804	5.14305	4.60472	4.12532	3.30757	2.63487	2.35845	2.13924	1.89432	-2.24626	-0.561566	-4.19372	-0.635412	1.19698		122	0.464	2.467	0.89	0	0	0.0005	0.06	0.17	0.17	0.23	0.25	0.31
294	TAN2206_SW-64_26-27cm	2024-05-10 11:07:19	26.5	14.6	28.1	40.7	56.8	101	163	200	235	282	0.0146	0.0281	0.0407	0.0568	0.101	0.163	0.2	0.235	0.282	6.09789	5.15329	4.61883	4.13797	3.30757	2.61706	2.32193	2.08927	1.82623	-2.2969	-0.574225	-4.27165	-0.64722	1.22145		121	0.853	2.5	1.014	0	0	0.0005	0.06	0.17	0.17	0.23	0.25	0.31
295	TAN2206_SW-64_26-27cm	2024-05-10 11:07:42	26.5	14.5	27.9	40.6	56.8	101	161	195	228	271	0.0145	0.0279	0.0406	0.0568	0.101	0.161	0.195	0.228	0.271	6.1078	5.16359	4.62238	4.13797	3.30757	2.63487	2.35845	2.13289	1.88364	-2.26392	-0.565981	-4.22417	-0.640025	1.20601		123	0.512	2.481	0.908	0	0	0.0005	0.06	0.17	0.17	0.23	0.26	0.32
296	TAN2206_SW-64_26-27cm	2024-05-10 11:08:06	26.5	14.2	27.6	40.2	55.8	98.8	158	193	226	269	0.0142	0.0276	0.0402	0.0558	0.0988	0.158	0.193	0.226	0.269	6.13797	5.17919	4.63666	4.16359	3.33935	2.662	2.37333	2.14561	1.89432	-2.26333	-0.565833	-4.24364	-0.642976	1.20881		118	0.543	2.481	0.926	0	0	0.0005	0.07	0.17	0.17	0.24	0.26	0.32
297	Average of 'TAN2206_SW-64_26-27cm'	2024-05-10 11:04:29	26.5	14.6	28.1	40.9	57.1	101	161	196	229	271	0.0146	0.0281	0.0409	0.0571	0.101	0.161	0.196	0.229	0.271	6.09789	5.15329	4.61176	4.13037	3.30757	2.63487	2.35107	2.12658	1.88364	-2.26068	-0.56517	-4.21425	-0.638523	1.20369		123	0.528	2.477	0.911	0	0	0.0005	0.06	0.17	0.17	0.23	0.25	0.32
298	TAN2206_SW-64_27-28cm	2024-05-10 11:16:06	27.5	16.6	30.4	42.2	57.4	100	163	200	235	281	0.0166	0.0304	0.0422	0.0574	0.1	0.163	0.2	0.235	0.281	5.91267	5.03978	4.56661	4.12281	3.32193	2.61706	2.32193	2.08927	1.83136	-2.24469	-0.561171	-4.08131	-0.618381	1.17955		118	0.721	2.432	0.998	0	0	0.0005	0.06	0.15	0.15	0.2	0.22	0.27
299	TAN2206_SW-64_27-28cm	2024-05-10 11:16:29	27.5	16.5	30.4	42.2	57.4	100	162	197	231	275	0.0165	0.0304	0.0422	0.0574	0.1	0.162	0.197	0.231	0.275	5.92139	5.03978	4.56661	4.12281	3.32193	2.62593	2.34373	2.11404	1.8625	-2.22288	-0.55572	-4.05889	-0.614984	1.1707		119	0.611	2.421	0.956	0	0	0.0005	0.06	0.15	0.15	0.2	0.22	0.28
300	TAN2206_SW-64_27-28cm	2024-05-10 11:16:53	27.5	16.7	30.6	42.6	57.9	101	162	197	232	276	0.0167	0.0306	0.0426	0.0579	0.101	0.162	0.197	0.232	0.276	5.90401	5.03032	4.553	4.11029	3.30757	2.62593	2.34373	2.1078	1.85726	-2.20927	-0.552318	-4.04675	-0.613144	1.16546		118	0.676	2.416	0.973	0	0	0.0004	0.06	0.15	0.15	0.2	0.22	0.27
301	TAN2206_SW-64_27-28cm	2024-05-10 11:17:18	27.5	16.5	30.4	42.3	57.5	101	162	198	233	277	0.0165	0.0304	0.0423	0.0575	0.101	0.162	0.198	0.233	0.277	5.92139	5.03978	4.5632	4.12029	3.30757	2.62593	2.33643	2.1016	1.85204	-2.22677	-0.556693	-4.06935	-0.616568	1.17326		119	0.645	2.425	0.968	0	0	0.0005	0.06	0.15	0.15	0.2	0.22	0.28
302	TAN2206_SW-64_27-28cm	2024-05-10 11:17:41	27.5	16.5	30.4	42.2	57.3	99.4	159	194	228	271	0.0165	0.0304	0.0422	0.0573	0.0994	0.159	0.194	0.228	0.271	5.92139	5.03978	4.56661	4.12532	3.33061	2.6529	2.36587	2.13289	1.88364	-2.20074	-0.550185	-4.03775	-0.611781	1.16197		117	0.718	2.41	0.98	0	0	0.0005	0.06	0.15	0.15	0.2	0.22	0.28
303	TAN2206_SW-64_27-28cm	2024-05-10 11:18:06	27.5	16.8	30.7	42.6	58.2	102	165	200	234	276	0.0168	0.0307	0.0426	0.0582	0.102	0.165	0.2	0.234	0.276	5.89539	5.02562	4.553	4.10284	3.29336	2.59946	2.32193	2.09542	1.85726	-2.23107	-0.557769	-4.03814	-0.611839	1.16961		125	0.422	2.42	0.899	0	0	0.0004	0.06	0.15	0.15	0.2	0.22	0.27
304	TAN2206_SW-64_27-28cm	2024-05-10 11:18:31	27.5	16.7	30.6	42.3	57.5	101	162	197	231	273	0.0167	0.0306	0.0423	0.0575	0.101	0.162	0.197	0.231	0.273	5.90401	5.03032	4.5632	4.12029	3.30757	2.62593	2.34373	2.11404	1.87303	-2.21947	-0.554867	-4.03098	-0.610755	1.16562		121	0.488	2.416	0.923	0	0	0.0005	0.06	0.15	0.15	0.2	0.22	0.27
305	TAN2206_SW-64_27-28cm	2024-05-10 11:18:55	27.5	16.8	30.7	42.7	58.2	101	163	199	233	279	0.0168	0.0307	0.0427	0.0582	0.101	0.163	0.199	0.233	0.279	5.89539	5.02562	4.54962	4.10284	3.30757	2.61706	2.32916	2.1016	1.84166	-2.22046	-0.555115	-4.05373	-0.614202	1.16932		120	0.68	2.421	0.973	0	0	0.0004	0.06	0.15	0.15	0.2	0.22	0.27
306	TAN2206_SW-64_27-28cm	2024-05-10 11:19:18	27.5	17	31	42.9	58.4	102	165	202	238	288	0.017	0.031	0.0429	0.0584	0.102	0.165	0.202	0.238	0.288	5.87832	5.01159	4.54288	4.09789	3.29336	2.59946	2.30757	2.07097	1.79586	-2.23531	-0.558826	-4.08246	-0.618555	1.17738		119	0.947	2.431	1.058	0	0	0.0004	0.06	0.15	0.15	0.2	0.22	0.27
307	TAN2206_SW-64_27-28cm	2024-05-10 11:19:42	27.5	16.7	30.7	42.5	57.8	101	163	199	233	278	0.0167	0.0307	0.0425	0.0578	0.101	0.163	0.199	0.233	0.278	5.90401	5.02562	4.55639	4.11279	3.30757	2.61706	2.32916	2.1016	1.84684	-2.22723	-0.556808	-4.05716	-0.614722	1.17153		120	0.637	2.422	0.966	0	0	0.0004	0.06	0.15	0.15	0.2	0.22	0.27
308	Average of 'TAN2206_SW-64_27-28cm'	2024-05-10 11:16:06	27.5	16.7	30.6	42.4	57.8	101	163	198	233	278	0.0167	0.0306	0.0424	0.0578	0.101	0.163	0.198	0.233	0.278	5.90401	5.03032	4.55979	4.11279	3.30757	2.61706	2.33643	2.1016	1.84684	-2.22336	-0.555841	-4.05716	-0.614722	1.17056		120	0.668	2.421	0.972	0	0	0.0005	0.06	0.15	0.15	0.2	0.22	0.27
309	TAN2206_SW-64_28-29cm	2024-05-10 11:26:59	28.5	28.7	42.3	54.5	70.5	116	181	219	256	305	0.0287	0.0423	0.0545	0.0705	0.116	0.181	0.219	0.256	0.305	5.12281	4.5632	4.1976	3.82623	3.1078	2.46594	2.191	1.96578	1.71312	-2.0066	-0.501651	-3.40969	-0.516619	1.01827		130	0.818	2.158	1.008	0	0	0	0	0.03	0.08	0.11	0.11	0.13
310	TAN2206_SW-64_28-29cm	2024-05-10 11:27:23	28.5	28.4	41.8	53.9	70	115	179	214	249	293	0.0284	0.0418	0.0539	0.07	0.115	0.179	0.214	0.249	0.293	5.13797	4.58035	4.21357	3.8365	3.12029	2.48197	2.22432	2.00578	1.77103	-1.98925	-0.497313	-3.36694	-0.510142	1.00746		134	0.46	2.146	0.889	0	0	0	0	0.03	0.08	0.11	0.11	0.13
311	TAN2206_SW-64_28-29cm	2024-05-10 11:27:48	28.5	28.4	41.9	54	69.9	115	178	213	247	291	0.0284	0.0419	0.054	0.0699	0.115	0.178	0.213	0.247	0.291	5.13797	4.57691	4.2109	3.83856	3.12029	2.49005	2.23107	2.01742	1.78091	-1.97982	-0.494956	-3.35706	-0.508645	1.0036		132	0.467	2.14	0.89	0	0	0	0	0.03	0.08	0.11	0.11	0.13
312	TAN2206_SW-64_28-29cm	2024-05-10 11:28:12	28.5	28.4	41.8	53.8	69.7	115	177	211	244	287	0.0284	0.0418	0.0538	0.0697	0.115	0.177	0.211	0.244	0.287	5.13797	4.58035	4.21625	3.8427	3.12029	2.49818	2.24469	2.03505	1.80088	-1.97156	-0.492891	-3.33709	-0.505619	0.998511		133	0.391	2.134	0.861	0	0	0	0	0.03	0.08	0.11	0.11	0.13
313	TAN2206_SW-64_28-29cm	2024-05-10 11:28:35	28.5	28.4	41.9	54.1	70.1	116	179	215	251	297	0.0284	0.0419	0.0541	0.0701	0.116	0.179	0.215	0.251	0.297	5.13797	4.57691	4.20823	3.83444	3.1078	2.48197	2.21759	1.99424	1.75147	-1.99064	-0.497659	-3.3865	-0.513106	1.01077		132	0.657	2.151	0.948	0	0	0	0	0.03	0.08	0.11	0.11	0.13
314	TAN2206_SW-64_28-29cm	2024-05-10 11:29:01	28.5	28.4	41.8	53.8	69.7	115	179	215	250	295	0.0284	0.0418	0.0538	0.0697	0.115	0.179	0.215	0.25	0.295	5.13797	4.58035	4.21625	3.8427	3.12029	2.48197	2.21759	2	1.76121	-1.99866	-0.499665	-3.37675	-0.511629	1.01129		132	0.521	2.149	0.915	0	0	0	0	0.03	0.08	0.11	0.11	0.13
315	TAN2206_SW-64_28-29cm	2024-05-10 11:29:24	28.5	27.8	41.1	52.9	68.4	112	173	207	240	284	0.0278	0.0411	0.0529	0.0684	0.112	0.173	0.207	0.24	0.284	5.16877	4.60472	4.24059	3.86986	3.15843	2.53116	2.2723	2.05889	1.81604	-1.96829	-0.492073	-3.35273	-0.50799	1.00006		128	0.487	2.139	0.895	0	0	0	0	0.03	0.08	0.11	0.12	0.13
316	TAN2206_SW-64_28-29cm	2024-05-10 11:29:48	28.5	28.6	42.1	54.2	70.4	117	181	216	251	295	0.0286	0.0421	0.0542	0.0704	0.117	0.181	0.216	0.251	0.295	5.12784	4.57004	4.20556	3.82828	3.09542	2.46594	2.2109	1.99424	1.76121	-1.99467	-0.498667	-3.36663	-0.510095	1.00876		136	0.396	2.146	0.87	0	0	0	0	0.03	0.08	0.11	0.11	0.13
317	TAN2206_SW-64_28-29cm	2024-05-10 11:30:11	28.5	28.7	42.1	54.2	70.2	116	181	217	252	298	0.0287	0.0421	0.0542	0.0702	0.116	0.181	0.217	0.252	0.298	5.12281	4.57004	4.20556	3.83239	3.1078	2.46594	2.20423	1.9885	1.74662	-2.00133	-0.500333	-3.37619	-0.511544	1.01188		135	0.463	2.15	0.898	0	0	0	0	0.03	0.08	0.11	0.11	0.13
318	TAN2206_SW-64_28-29cm	2024-05-10 11:30:35	28.5	28.1	41.5	53.5	69.3	114	177	213	249	295	0.0281	0.0415	0.0535	0.0693	0.114	0.177	0.213	0.249	0.295	5.15329	4.59074	4.22432	3.851	3.13289	2.49818	2.23107	2.00578	1.76121	-1.99324	-0.498311	-3.39207	-0.51395	1.01226		131	0.702	2.155	0.962	0	0	0	0	0.03	0.08	0.11	0.11	0.13
319	Average of 'TAN2206_SW-64_28-29cm'	2024-05-10 11:26:59	28.5	28.4	41.8	53.9	69.8	115	178	214	249	294	0.0284	0.0418	0.0539	0.0698	0.115	0.178	0.214	0.249	0.294	5.13797	4.58035	4.21357	3.84063	3.12029	2.49005	2.22432	2.00578	1.76611	-1.98925	-0.497313	-3.37185	-0.510887	1.0082		132	0.559	2.147	0.919	0	0	0	0	0.03	0.08	0.11	0.11	0.13
320	TAN2206_SW-64_29-30cm	2024-05-10 11:37:55	29.5	29.9	40.6	49.6	61.3	93.7	140	167	194	231	0.0299	0.0406	0.0496	0.0613	0.0937	0.14	0.167	0.194	0.231	5.06371	4.62238	4.33352	4.02797	3.41581	2.8365	2.58208	2.36587	2.11404	-1.75144	-0.437859	-2.94968	-0.446921	0.88478		98.4	0.904	1.937	1.011	0	0	0	0	0.0005	0.04	0.09	0.06	0.0005
321	TAN2206_SW-64_29-30cm	2024-05-10 11:38:18	29.5	30.4	40.9	49.9	61.6	94.2	141	168	195	231	0.0304	0.0409	0.0499	0.0616	0.0942	0.141	0.168	0.195	0.231	5.03978	4.61176	4.32482	4.02093	3.40813	2.82623	2.57347	2.35845	2.11404	-1.75135	-0.437837	-2.92575	-0.443295	0.881133		99.3	0.865	1.902	1.002	0	0	0	0	0	0	0	0	0
322	TAN2206_SW-64_29-30cm	2024-05-10 11:38:42	29.5	30.5	40.9	49.8	61.5	94	140	168	195	232	0.0305	0.0409	0.0498	0.0615	0.094	0.14	0.168	0.195	0.232	5.03505	4.61176	4.32771	4.02327	3.4112	2.8365	2.57347	2.35845	2.1078	-1.75424	-0.438561	-2.92724	-0.443522	0.882083		98.6	0.895	1.904	1.017	0	0	0	0	0	0	0	0	0
323	TAN2206_SW-64_29-30cm	2024-05-10 11:39:05	29.5	29.8	40.5	49.4	61.1	93.6	141	169	197	234	0.0298	0.0405	0.0494	0.0611	0.0936	0.141	0.169	0.197	0.234	5.06854	4.62593	4.33935	4.03268	3.41735	2.82623	2.5649	2.34373	2.09542	-1.77444	-0.44361	-2.97312	-0.450473	0.894083		97.2	1.014	1.947	1.053	0	0	0	0	0.0005	0.04	0.09	0.06	0.0005
324	TAN2206_SW-64_29-30cm	2024-05-10 11:39:29	29.5	30	40.7	49.7	61.6	94.7	143	171	200	238	0.03	0.0407	0.0497	0.0616	0.0947	0.143	0.171	0.2	0.238	5.05889	4.61883	4.33061	4.02093	3.40049	2.80591	2.54793	2.32193	2.07097	-1.78268	-0.44567	-2.98793	-0.452716	0.898386		98.6	1.023	1.953	1.056	0	0	0	0	0.0005	0.04	0.09	0.06	0.0005
325	TAN2206_SW-64_29-30cm	2024-05-10 11:39:54	29.5	29.9	40.6	49.7	61.5	94.4	141	169	197	233	0.0299	0.0406	0.0497	0.0615	0.0944	0.141	0.169	0.197	0.233	5.06371	4.62238	4.33061	4.02327	3.40507	2.82623	2.5649	2.34373	2.1016	-1.76571	-0.441426	-2.96211	-0.448805	0.890231		99.3	0.856	1.942	1.004	0	0	0	0	0.0005	0.04	0.09	0.06	0.0005
326	TAN2206_SW-64_29-30cm	2024-05-10 11:40:18	29.5	30.3	40.8	49.8	61.5	94	140	168	195	231	0.0303	0.0408	0.0498	0.0615	0.094	0.14	0.168	0.195	0.231	5.04454	4.61529	4.32771	4.02327	3.4112	2.8365	2.57347	2.35845	2.11404	-1.75424	-0.438561	-2.9305	-0.444016	0.882577		98.8	0.88	1.904	1.008	0	0	0	0	0	0	0	0	0
327	TAN2206_SW-64_29-30cm	2024-05-10 11:40:41	29.5	29.6	40.3	49.3	61	93.4	140	168	195	232	0.0296	0.0403	0.0493	0.061	0.0934	0.14	0.168	0.195	0.232	5.07826	4.63308	4.34227	4.03505	3.42043	2.8365	2.57347	2.35845	2.1078	-1.7688	-0.4422	-2.97046	-0.450069	0.892269		97.7	0.928	1.944	1.026	0	0	0	0	0.0005	0.04	0.09	0.06	0.0005
328	TAN2206_SW-64_29-30cm	2024-05-10 11:41:07	29.5	29.4	40.2	49.2	60.9	93.2	139	167	194	230	0.0294	0.0402	0.0492	0.0609	0.0932	0.139	0.167	0.194	0.23	5.08804	4.63666	4.3452	4.03741	3.42353	2.84684	2.58208	2.36587	2.12029	-1.76312	-0.440779	-2.96775	-0.449658	0.890438		97.9	0.902	1.953	1.01	0	0	0	0	0.03	0.07	0.09	0.06	0.0005
329	TAN2206_SW-64_29-30cm	2024-05-10 11:41:30	29.5	29.9	40.6	49.6	61.3	93.9	141	168	196	233	0.0299	0.0406	0.0496	0.0613	0.0939	0.141	0.168	0.196	0.233	5.06371	4.62238	4.33352	4.02797	3.41273	2.82623	2.57347	2.35107	2.1016	-1.76005	-0.440012	-2.96211	-0.448805	0.888817		98.2	0.95	1.943	1.031	0	0	0	0	0.0005	0.04	0.09	0.06	0.0005
330	Average of 'TAN2206_SW-64_29-30cm'	2024-05-10 11:37:55	29.5	30	40.6	49.6	61.3	93.9	141	168	196	232	0.03	0.0406	0.0496	0.0613	0.0939	0.141	0.168	0.196	0.232	5.05889	4.62238	4.33352	4.02797	3.41273	2.82623	2.57347	2.35107	2.1078	-1.76005	-0.440012	-2.95109	-0.447135	0.887147		98.4	0.928	1.933	1.023	0	0	0	0	0.003	0.03	0.06	0.04	0.0003
331	TAN2206_SW-64_30-31cm	2024-05-10 11:49:20	30.5	31.9	43.6	54	67.6	105	158	189	219	260	0.0319	0.0436	0.054	0.0676	0.105	0.158	0.189	0.219	0.26	4.9703	4.51953	4.2109	3.88683	3.25154	2.662	2.40354	2.191	1.94342	-1.80735	-0.451839	-3.02688	-0.458619	0.910457		112	0.843	1.955	0.997	0	0	0	0	0.0005	0.04	0.09	0.06	0.0005
332	TAN2206_SW-64_30-31cm	2024-05-10 11:49:44	30.5	31.7	43.3	53.6	67	104	156	186	216	257	0.0317	0.0433	0.0536	0.067	0.104	0.156	0.186	0.216	0.257	4.97937	4.52949	4.22162	3.8997	3.26534	2.68038	2.42663	2.2109	1.96016	-1.795	-0.448749	-3.01921	-0.457457	0.906206		111	0.901	1.953	1.008	0	0	0	0	0.0005	0.04	0.09	0.06	0.0005
333	TAN2206_SW-64_30-31cm	2024-05-10 11:50:08	30.5	31.8	43.4	53.6	67	104	156	187	218	259	0.0318	0.0434	0.0536	0.067	0.104	0.156	0.187	0.218	0.259	4.97483	4.52616	4.22162	3.8997	3.26534	2.68038	2.41889	2.1976	1.94898	-1.80273	-0.450683	-3.02585	-0.458463	0.909146		110	0.956	1.951	1.036	0	0	0	0	0.0005	0.04	0.09	0.06	0.0005
334	TAN2206_SW-64_30-31cm	2024-05-10 11:50:32	30.5	31.5	43.2	53.5	66.8	103	156	187	218	259	0.0315	0.0432	0.0535	0.0668	0.103	0.156	0.187	0.218	0.259	4.9885	4.53282	4.22432	3.90401	3.27928	2.68038	2.41889	2.1976	1.94898	-1.80543	-0.451357	-3.03953	-0.460535	0.911891		110	0.93	1.959	1.027	0	0	0	0	0.0004	0.04	0.09	0.06	0.0005
335	TAN2206_SW-64_30-31cm	2024-05-10 11:50:57	30.5	32.1	43.6	53.9	67.3	104	156	185	215	253	0.0321	0.0436	0.0539	0.0673	0.104	0.156	0.185	0.215	0.253	4.96128	4.51953	4.21357	3.89325	3.26534	2.68038	2.4344	2.21759	1.98279	-1.77917	-0.444792	-2.97849	-0.451287	0.896079		112	0.616	1.91	0.931	0	0	0	0	0	0	0	0	0
336	TAN2206_SW-64_30-31cm	2024-05-10 11:51:23	30.5	31.6	43.2	53.5	66.9	103	155	185	214	254	0.0316	0.0432	0.0535	0.0669	0.103	0.155	0.185	0.214	0.254	4.98393	4.53282	4.22432	3.90185	3.27928	2.68966	2.4344	2.22432	1.9771	-1.78991	-0.447479	-3.00683	-0.455581	0.903059		111	0.689	1.949	0.951	0	0	0	0	0.0005	0.04	0.09	0.06	0.0005
337	TAN2206_SW-64_30-31cm	2024-05-10 11:51:46	30.5	31.5	43.2	53.5	66.9	104	156	186	216	257	0.0315	0.0432	0.0535	0.0669	0.104	0.156	0.186	0.216	0.257	4.9885	4.53282	4.22432	3.90185	3.26534	2.68038	2.42663	2.2109	1.96016	-1.79769	-0.449423	-3.02834	-0.45884	0.908263		111	0.923	1.956	1.014	0	0	0	0	0.0005	0.04	0.09	0.06	0.0005
338	TAN2206_SW-64_30-31cm	2024-05-10 11:52:10	30.5	31.7	43.3	53.7	67.3	105	158	190	221	262	0.0317	0.0433	0.0537	0.0673	0.105	0.158	0.19	0.221	0.262	4.97937	4.52949	4.21893	3.89325	3.25154	2.662	2.39593	2.17788	1.93236	-1.82301	-0.455751	-3.04701	-0.461668	0.91742		112	0.844	1.966	1.005	0	0	0	0	0.0005	0.04	0.09	0.06	0.0005
339	TAN2206_SW-64_30-31cm	2024-05-10 11:52:33	30.5	31.8	43.5	54	67.6	105	159	191	222	263	0.0318	0.0435	0.054	0.0676	0.105	0.159	0.191	0.222	0.263	4.97483	4.52284	4.2109	3.88683	3.25154	2.6529	2.38836	2.17137	1.92687	-1.82254	-0.455635	-3.04796	-0.461813	0.917448		112	0.842	1.966	1.007	0	0	0	0	0.0005	0.04	0.09	0.06	0.0005
340	TAN2206_SW-64_30-31cm	2024-05-10 11:52:57	30.5	31.9	43.8	54.2	67.8	105	159	190	221	263	0.0319	0.0438	0.0542	0.0678	0.105	0.159	0.19	0.221	0.263	4.9703	4.51293	4.20556	3.88257	3.25154	2.6529	2.39593	2.17788	1.92687	-1.80963	-0.452409	-3.04343	-0.461126	0.913535		112	0.85	1.961	1.007	0	0	0	0	0.0005	0.04	0.09	0.06	0.0005
341	Average of 'TAN2206_SW-64_30-31cm'	2024-05-10 11:49:20	30.5	31.8	43.4	53.8	67.2	104	157	187	218	259	0.0318	0.0434	0.0538	0.0672	0.104	0.157	0.187	0.218	0.259	4.97483	4.52616	4.21625	3.89539	3.26534	2.67116	2.41889	2.1976	1.94898	-1.79736	-0.44934	-3.02585	-0.458463	0.907803		111	0.85	1.953	1.001	0	0	0	0	0.0004	0.04	0.08	0.06	0.0004
342	TAN2206_SW-64_31-32cm	2024-05-10 12:00:13	31.5	67	87.5	104	124	176	242	277	309	350	0.067	0.0875	0.104	0.124	0.176	0.242	0.277	0.309	0.35	3.8997	3.51457	3.26534	3.01159	2.50635	2.04692	1.85204	1.69432	1.51457	-1.4133	-0.353326	-2.38512	-0.361382	0.714708		190	-0.11	1.709	0.539	0	0	0	0	0	0	0	0	0
343	TAN2206_SW-64_31-32cm	2024-05-10 12:00:37	31.5	66.7	87.2	103	124	175	239	273	305	345	0.0667	0.0872	0.103	0.124	0.175	0.239	0.273	0.305	0.345	3.90617	3.51953	3.27928	3.01159	2.51457	2.06492	1.87303	1.71312	1.53533	-1.40626	-0.351564	-2.37084	-0.359218	0.710782		188	-0.093	1.706	0.533	0	0	0	0	0	0	0	0	0
344	TAN2206_SW-64_31-32cm	2024-05-10 12:01:03	31.5	66.4	86.6	103	123	174	240	276	309	352	0.0664	0.0866	0.103	0.123	0.174	0.24	0.276	0.309	0.352	3.91267	3.52949	3.27928	3.02327	2.52284	2.05889	1.85726	1.69432	1.50635	-1.42202	-0.355506	-2.40632	-0.364594	0.7201		186	0.076	1.717	0.618	0	0	0	0	0	0	0	0	0
345	TAN2206_SW-64_31-32cm	2024-05-10 12:01:26	31.5	66.4	87.1	103	123	175	239	274	306	346	0.0664	0.0871	0.103	0.123	0.175	0.239	0.274	0.306	0.346	3.91267	3.52118	3.27928	3.02327	2.51457	2.06492	1.86775	1.7084	1.53116	-1.41153	-0.352883	-2.38152	-0.360836	0.713719		188	-0.096	1.707	0.533	0	0	0	0	0	0	0	0	0
346	TAN2206_SW-64_31-32cm	2024-05-10 12:01:50	31.5	65.2	86.6	103	123	175	240	274	307	347	0.0652	0.0866	0.103	0.123	0.175	0.24	0.274	0.307	0.347	3.93898	3.52949	3.27928	3.02327	2.51457	2.05889	1.86775	1.70369	1.52699	-1.41153	-0.352883	-2.41199	-0.365453	0.718336		188	-0.095	1.714	0.536	0	0	0	0	0	0	0	0	0
347	TAN2206_SW-64_31-32cm	2024-05-10 12:02:15	31.5	65.3	86.8	103	124	176	242	278	309	350	0.0653	0.0868	0.103	0.124	0.176	0.242	0.278	0.309	0.35	3.93677	3.52616	3.27928	3.01159	2.50635	2.04692	1.84684	1.69432	1.51457	-1.43244	-0.35811	-2.4222	-0.367	0.72511		190	-0.12	1.718	0.531	0	0	0	0	0	0	0	0	0
348	TAN2206_SW-64_31-32cm	2024-05-10 12:02:41	31.5	67.1	87.8	104	125	177	243	279	311	351	0.0671	0.0878	0.104	0.125	0.177	0.243	0.279	0.311	0.351	3.89754	3.50964	3.26534	3	2.49818	2.04097	1.84166	1.68501	1.51046	-1.42368	-0.35592	-2.38709	-0.36168	0.7176		191	-0.125	1.71	0.529	0	0	0	0	0	0	0	0	0
349	TAN2206_SW-64_31-32cm	2024-05-10 12:03:04	31.5	66	87.2	103	124	175	239	274	306	346	0.066	0.0872	0.103	0.124	0.175	0.239	0.274	0.306	0.346	3.92139	3.51953	3.27928	3.01159	2.51457	2.06492	1.86775	1.7084	1.53116	-1.41153	-0.352883	-2.39023	-0.362157	0.71504		189	-0.098	1.709	0.525	0	0	0	0	0	0	0	0	0
350	TAN2206_SW-64_31-32cm	2024-05-10 12:03:28	31.5	67.9	88.8	105	126	177	242	277	308	348	0.0679	0.0888	0.105	0.126	0.177	0.242	0.277	0.308	0.348	3.88044	3.4933	3.25154	2.9885	2.49818	2.04692	1.85204	1.699	1.52284	-1.3995	-0.349874	-2.3576	-0.357213	0.707087		191	-0.115	1.701	0.517	0	0	0	0	0	0	0	0	0
351	TAN2206_SW-64_31-32cm	2024-05-10 12:03:51	31.5	66.1	87.4	104	125	177	243	278	309	350	0.0661	0.0874	0.104	0.125	0.177	0.243	0.278	0.309	0.35	3.91921	3.51622	3.26534	3	2.49818	2.04097	1.84684	1.69432	1.51457	-1.4185	-0.354625	-2.40463	-0.364338	0.718964		191	-0.125	1.713	0.524	0	0	0	0	0	0	0	0	0
352	Average of 'TAN2206_SW-64_31-32cm'	2024-05-10 12:00:13	31.5	66.5	87.3	104	124	176	241	276	308	348	0.0665	0.0873	0.104	0.124	0.176	0.241	0.276	0.308	0.348	3.9105	3.51787	3.26534	3.01159	2.50635	2.05289	1.85726	1.699	1.52284	-1.40808	-0.352021	-2.38766	-0.361767	0.713788		189	-0.088	1.71	0.539	0	0	0	0	0	0	0	0	0
353	TAN2206_SW-64_32-33cm	2024-05-10 12:11:59	32.5	72.5	91	107	128	184	260	304	346	403	0.0725	0.091	0.107	0.128	0.184	0.26	0.304	0.346	0.403	3.78588	3.45799	3.22432	2.96578	2.44222	1.94342	1.71786	1.53116	1.31115	-1.50646	-0.376615	-2.47473	-0.374959	0.751574		189	0.641	1.75	0.883	0	0	0	0	0	0	0	0	0
354	TAN2206_SW-64_32-33cm	2024-05-10 12:12:24	32.5	71	89.4	105	126	181	258	302	345	403	0.071	0.0894	0.105	0.126	0.181	0.258	0.302	0.345	0.403	3.81604	3.48358	3.25154	2.9885	2.46594	1.95456	1.72738	1.53533	1.31115	-1.52416	-0.38104	-2.50489	-0.379529	0.760568		186	0.769	1.761	0.928	0	0	0	0	0	0	0	0	0
355	TAN2206_SW-64_32-33cm	2024-05-10 12:12:48	32.5	72.1	90.6	107	127	183	262	307	352	417	0.0721	0.0906	0.107	0.127	0.183	0.262	0.307	0.352	0.417	3.79386	3.46435	3.22432	2.9771	2.45008	1.93236	1.70369	1.50635	1.26188	-1.52063	-0.380157	-2.53198	-0.383633	0.76379		187	1.158	1.768	1.032	0	0	0	0	0	0	0	0	0
356	TAN2206_SW-64_32-33cm	2024-05-10 12:13:11	32.5	70.9	89.6	106	126	181	257	300	343	399	0.0709	0.0896	0.106	0.126	0.181	0.257	0.3	0.343	0.399	3.81807	3.48036	3.23786	2.9885	2.46594	1.96016	1.73697	1.54372	1.32554	-1.5009	-0.375225	-2.49253	-0.377656	0.752881		187	0.69	1.756	0.895	0	0	0	0	0	0	0	0	0
357	TAN2206_SW-64_32-33cm	2024-05-10 12:13:36	32.5	72.1	90.7	107	128	185	266	313	360	427	0.0721	0.0907	0.107	0.128	0.185	0.266	0.313	0.36	0.427	3.79386	3.46275	3.22432	2.96578	2.4344	1.9105	1.67577	1.47393	1.22769	-1.54855	-0.387138	-2.56616	-0.388813	0.775951		189	1.141	1.779	1.042	0	0	0	0	0	0	0	0	0
358	TAN2206_SW-64_32-33cm	2024-05-10 12:14:01	32.5	71.5	90.1	106	127	183	260	304	348	406	0.0715	0.0901	0.106	0.127	0.183	0.26	0.304	0.348	0.406	3.80591	3.47233	3.23786	2.9771	2.45008	1.94342	1.71786	1.52284	1.30045	-1.52001	-0.380002	-2.50546	-0.379616	0.759618		189	0.65	1.759	0.894	0	0	0	0	0	0	0	0	0
359	TAN2206_SW-64_32-33cm	2024-05-10 12:14:25	32.5	72	90.8	107	127	182	257	299	341	396	0.072	0.0908	0.107	0.127	0.182	0.257	0.299	0.341	0.396	3.79586	3.46116	3.22432	2.9771	2.45799	1.96016	1.74178	1.55216	1.33643	-1.48253	-0.370634	-2.45943	-0.372641	0.743275		188	0.693	1.746	0.883	0	0	0	0	0	0	0	0	0
360	TAN2206_SW-64_32-33cm	2024-05-10 12:14:48	32.5	70.7	89.5	106	127	182	259	303	346	403	0.0707	0.0895	0.106	0.127	0.182	0.259	0.303	0.346	0.403	3.82215	3.48197	3.23786	2.9771	2.45799	1.94898	1.72261	1.53116	1.31115	-1.51525	-0.378813	-2.511	-0.380454	0.759268		189	0.627	1.763	0.882	0	0	0	0	0	0	0	0	0
361	TAN2206_SW-64_32-33cm	2024-05-10 12:15:13	32.5	71.5	90.2	106	127	183	259	302	344	400	0.0715	0.0902	0.106	0.127	0.183	0.259	0.302	0.344	0.4	3.80591	3.47073	3.23786	2.9771	2.45008	1.94898	1.72738	1.53952	1.32193	-1.51048	-0.377621	-2.48398	-0.376361	0.753982		189	0.648	1.754	0.881	0	0	0	0	0	0	0	0	0
362	TAN2206_SW-64_32-33cm	2024-05-10 12:15:36	32.5	70.6	89.3	105	126	180	255	298	341	396	0.0706	0.0893	0.105	0.126	0.18	0.255	0.298	0.341	0.396	3.82419	3.4852	3.25154	2.9885	2.47393	1.97143	1.74662	1.55216	1.33643	-1.50492	-0.376231	-2.48776	-0.376933	0.753164		186	0.715	1.756	0.898	0	0	0	0	0	0	0	0	0
363	Average of 'TAN2206_SW-64_32-33cm'	2024-05-10 12:11:59	32.5	71.5	90.1	106	127	182	259	303	346	405	0.0715	0.0901	0.106	0.127	0.182	0.259	0.303	0.346	0.405	3.80591	3.47233	3.23786	2.9771	2.45799	1.94898	1.72261	1.53116	1.30401	-1.51525	-0.378813	-2.50191	-0.379077	0.75789		188	0.818	1.759	0.931	0	0	0	0	0	0	0	0	0
364	TAN2206_SW-64_33-34cm	2024-05-10 12:23:32	33.5	78.4	97.7	114	134	187	257	294	330	376	0.0784	0.0977	0.114	0.134	0.187	0.257	0.294	0.33	0.376	3.673	3.3555	3.13289	2.8997	2.41889	1.96016	1.76611	1.59946	1.4112	-1.36678	-0.341696	-2.26181	-0.342698	0.684394		197	0.095	1.678	0.628	0	0	0	0	0	0	0	0	0
365	TAN2206_SW-64_33-34cm	2024-05-10 12:23:56	33.5	78.2	97.5	113	133	187	255	293	328	373	0.0782	0.0975	0.113	0.133	0.187	0.255	0.293	0.328	0.373	3.67669	3.35845	3.14561	2.9105	2.41889	1.97143	1.77103	1.60823	1.42275	-1.37458	-0.343644	-2.25394	-0.341505	0.68515		196	0.095	1.676	0.622	0	0	0	0	0	0	0	0	0
366	TAN2206_SW-64_33-34cm	2024-05-10 12:24:19	33.5	77.2	96.3	112	132	185	253	290	325	369	0.0772	0.0963	0.112	0.132	0.185	0.253	0.29	0.325	0.369	3.69526	3.37632	3.15843	2.92139	2.4344	1.98279	1.78588	1.62149	1.43831	-1.37255	-0.343139	-2.25695	-0.341962	0.6851		195	0.085	1.678	0.614	0	0	0	0	0	0	0	0	0
367	TAN2206_SW-64_33-34cm	2024-05-10 12:24:45	33.5	78	97.5	114	134	188	258	296	333	379	0.078	0.0975	0.114	0.134	0.188	0.258	0.296	0.333	0.379	3.68038	3.35845	3.13289	2.8997	2.4112	1.95456	1.75633	1.58641	1.39973	-1.37656	-0.344141	-2.28065	-0.345553	0.689694		197	0.119	1.686	0.644	0	0	0	0	0	0	0	0	0
368	TAN2206_SW-64_33-34cm	2024-05-10 12:25:08	33.5	77.6	97.3	114	134	189	259	297	333	379	0.0776	0.0973	0.114	0.134	0.189	0.259	0.297	0.333	0.379	3.6878	3.36142	3.13289	2.8997	2.40354	1.94898	1.75147	1.58641	1.39973	-1.38143	-0.345357	-2.28807	-0.346677	0.692034		199	0.073	1.687	0.621	0	0	0	0	0	0	0	0	0
369	TAN2206_SW-64_33-34cm	2024-05-10 12:25:32	33.5	77.8	97.5	114	134	188	257	295	330	375	0.0778	0.0975	0.114	0.134	0.188	0.257	0.295	0.33	0.375	3.68409	3.35845	3.13289	2.8997	2.4112	1.96016	1.76121	1.59946	1.41504	-1.37168	-0.34292	-2.26905	-0.343795	0.686716		198	0.068	1.681	0.608	0	0	0	0	0	0	0	0	0
370	TAN2206_SW-64_33-34cm	2024-05-10 12:25:55	33.5	78.4	98.2	114	135	189	259	297	334	380	0.0784	0.0982	0.114	0.135	0.189	0.259	0.297	0.334	0.38	3.673	3.34813	3.13289	2.88897	2.40354	1.94898	1.75147	1.58208	1.39593	-1.38143	-0.345357	-2.27707	-0.345011	0.690368		198	0.095	1.685	0.63	0	0	0	0	0	0	0	0	0
371	TAN2206_SW-64_33-34cm	2024-05-10 12:26:19	33.5	77.8	97.4	113	134	187	255	292	327	371	0.0778	0.0974	0.113	0.134	0.187	0.255	0.292	0.327	0.371	3.68409	3.35993	3.14561	2.8997	2.41889	1.97143	1.77596	1.61264	1.43051	-1.36965	-0.342411	-2.25358	-0.341451	0.683862		197	0.076	1.678	0.606	0	0	0	0	0	0	0	0	0
372	TAN2206_SW-64_33-34cm	2024-05-10 12:26:42	33.5	78.6	98.1	114	135	190	263	303	341	390	0.0786	0.0981	0.114	0.135	0.19	0.263	0.303	0.341	0.39	3.66933	3.3496	3.13289	2.88897	2.39593	1.92687	1.72261	1.55216	1.35845	-1.41028	-0.352571	-2.31087	-0.350132	0.702703		199	0.243	1.695	0.705	0	0	0	0	0	0	0	0	0
373	TAN2206_SW-64_33-34cm	2024-05-10 12:27:06	33.5	77.7	97	113	133	187	255	293	328	373	0.0777	0.097	0.113	0.133	0.187	0.255	0.293	0.328	0.373	3.68594	3.36587	3.14561	2.9105	2.41889	1.97143	1.77103	1.60823	1.42275	-1.37458	-0.343644	-2.26319	-0.342907	0.686552		196	0.096	1.681	0.622	0	0	0	0	0	0	0	0	0
374	Average of 'TAN2206_SW-64_33-34cm'	2024-05-10 12:23:32	33.5	78	97.4	114	134	188	257	295	331	377	0.078	0.0974	0.114	0.134	0.188	0.257	0.295	0.331	0.377	3.68038	3.35993	3.13289	2.8997	2.4112	1.96016	1.76121	1.5951	1.40736	-1.37168	-0.34292	-2.27302	-0.344397	0.687317		197	0.118	1.683	0.634	0	0	0	0	0	0	0	0	0
375	TAN2206_SW-64_34-35cm	2024-05-10 12:34:33	34.5	85.9	103	117	136	183	243	274	304	341	0.0859	0.103	0.117	0.136	0.183	0.243	0.274	0.304	0.341	3.5412	3.27928	3.09542	2.87832	2.45008	2.04097	1.86775	1.71786	1.55216	-1.22767	-0.306917	-1.98904	-0.30137	0.608287		191	-0.013	1.605	0.494	0	0	0	0	0	0	0	0	0
376	TAN2206_SW-64_34-35cm	2024-05-10 12:34:58	34.5	81.6	99.5	114	133	182	245	277	307	345	0.0816	0.0995	0.114	0.133	0.182	0.245	0.277	0.307	0.345	3.61529	3.32916	3.13289	2.9105	2.45799	2.02915	1.85204	1.70369	1.53533	-1.28085	-0.320213	-2.07996	-0.315145	0.635358		192	-0.068	1.628	0.511	0	0	0	0	0	0	0	0	0
377	TAN2206_SW-64_34-35cm	2024-05-10 12:35:21	34.5	85.4	102	117	135	183	243	274	303	340	0.0854	0.102	0.117	0.135	0.183	0.243	0.274	0.303	0.34	3.54962	3.29336	3.09542	2.88897	2.45008	2.04097	1.86775	1.72261	1.55639	-1.22767	-0.306917	-1.99323	-0.302004	0.608921		192	-0.09	1.593	0.488	0	0	0	0	0	0	0	0	0
378	TAN2206_SW-64_34-35cm	2024-05-10 12:35:47	34.5	85.8	102	117	135	182	240	271	300	336	0.0858	0.102	0.117	0.135	0.182	0.24	0.271	0.3	0.336	3.54288	3.29336	3.09542	2.88897	2.45799	2.05889	1.88364	1.73697	1.57347	-1.21178	-0.302946	-1.96941	-0.298396	0.601342		190	-0.02	1.6	0.475	0	0	0	0	0	0	0	0	0
379	TAN2206_SW-64_34-35cm	2024-05-10 12:36:12	34.5	85.8	103	117	136	184	244	277	306	344	0.0858	0.103	0.117	0.136	0.184	0.244	0.277	0.306	0.344	3.54288	3.27928	3.09542	2.87832	2.44222	2.03505	1.85204	1.7084	1.53952	-1.24338	-0.310844	-2.00336	-0.303539	0.614384		192	-0.012	1.61	0.508	0	0	0	0	0	0	0	0	0
380	TAN2206_SW-64_34-35cm	2024-05-10 12:36:37	34.5	86	102	117	136	184	244	275	304	341	0.086	0.102	0.117	0.136	0.184	0.244	0.275	0.304	0.341	3.53952	3.29336	3.09542	2.87832	2.44222	2.03505	1.8625	1.71786	1.55216	-1.23292	-0.308231	-1.98736	-0.301116	0.609346		193	-0.087	1.594	0.484	0	0	0	0	0	0	0	0	0
381	TAN2206_SW-64_34-35cm	2024-05-10 12:37:00	34.5	82.2	100	115	134	184	246	280	309	347	0.0822	0.1	0.115	0.134	0.184	0.246	0.28	0.309	0.347	3.60472	3.32193	3.12029	2.8997	2.44222	2.02327	1.8365	1.69432	1.52699	-1.28379	-0.320948	-2.07773	-0.314807	0.635755		193	-0.072	1.629	0.507	0	0	0	0	0	0	0	0	0
382	TAN2206_SW-64_34-35cm	2024-05-10 12:37:24	34.5	86.9	104	118	137	184	242	273	302	339	0.0869	0.104	0.118	0.137	0.184	0.242	0.273	0.302	0.339	3.5245	3.26534	3.08314	2.86775	2.44222	2.04692	1.87303	1.72738	1.56064	-1.21011	-0.302529	-1.96386	-0.297554	0.600083		192	-0.026	1.598	0.473	0	0	0	0	0	0	0	0	0
383	TAN2206_SW-64_34-35cm	2024-05-10 12:37:48	34.5	86.3	103	118	136	184	244	275	305	342	0.0863	0.103	0.118	0.136	0.184	0.244	0.275	0.305	0.342	3.5345	3.27928	3.08314	2.87832	2.44222	2.03505	1.8625	1.71312	1.54793	-1.22064	-0.305161	-1.98656	-0.300995	0.606156		192	-0.013	1.606	0.495	0	0	0	0	0	0	0	0	0
384	TAN2206_SW-64_34-35cm	2024-05-10 12:38:12	34.5	82.8	101	116	135	185	248	281	311	349	0.0828	0.101	0.116	0.135	0.185	0.248	0.281	0.311	0.349	3.59423	3.30757	3.1078	2.88897	2.4344	2.01159	1.83136	1.68501	1.5187	-1.27645	-0.319111	-2.07552	-0.314473	0.633585		194	-0.075	1.629	0.509	0	0	0	0	0	0	0	0	0
385	Average of 'TAN2206_SW-64_34-35cm'	2024-05-10 12:34:33	34.5	84.8	102	117	135	184	244	276	305	343	0.0848	0.102	0.117	0.135	0.184	0.244	0.276	0.305	0.343	3.55979	3.29336	3.09542	2.88897	2.44222	2.03505	1.85726	1.71312	1.54372	-1.23816	-0.30954	-2.01607	-0.305466	0.615005		192	-0.042	1.609	0.497	0	0	0	0	0	0	0	0	0
386	TAN2206_SW-64_35-36cm	2024-05-10 13:26:08	35.5	80.2	99.4	115	135	187	254	289	321	361	0.0802	0.0994	0.115	0.135	0.187	0.254	0.289	0.321	0.361	3.64025	3.33061	3.12029	2.88897	2.41889	1.9771	1.79086	1.63935	1.46993	-1.32944	-0.332359	-2.17032	-0.328837	0.661196		198	-0.148	1.644	0.512	0	0	0	0	0	0	0	0	0
387	TAN2206_SW-64_35-36cm	2024-05-10 13:26:34	35.5	78.9	98.4	114	135	188	256	292	327	370	0.0789	0.0984	0.114	0.135	0.188	0.256	0.292	0.327	0.37	3.66383	3.3452	3.13289	2.88897	2.4112	1.96578	1.77596	1.61264	1.4344	-1.35693	-0.339234	-2.22943	-0.337792	0.677026		198	0.039	1.662	0.593	0	0	0	0	0	0	0	0	0
388	TAN2206_SW-64_35-36cm	2024-05-10 13:26:59	35.5	80.2	99.5	115	135	188	254	290	322	363	0.0802	0.0995	0.115	0.135	0.188	0.254	0.29	0.322	0.363	3.64025	3.32916	3.12029	2.88897	2.4112	1.9771	1.78588	1.63487	1.46196	-1.33442	-0.333605	-2.1783	-0.330045	0.66365		199	-0.156	1.646	0.509	0	0	0	0	0	0	0	0	0
389	TAN2206_SW-64_35-36cm	2024-05-10 13:27:25	35.5	78.4	97.7	114	133	186	252	288	320	360	0.0784	0.0977	0.114	0.133	0.186	0.252	0.288	0.32	0.36	3.673	3.3555	3.13289	2.9105	2.42663	1.9885	1.79586	1.64386	1.47393	-1.33703	-0.334259	-2.19907	-0.333193	0.667451		197	-0.147	1.654	0.518	0	0	0	0	0	0	0	0	0
390	TAN2206_SW-64_35-36cm	2024-05-10 13:27:48	35.5	80.1	99.7	116	136	190	258	294	328	372	0.0801	0.0997	0.116	0.136	0.19	0.258	0.294	0.328	0.372	3.64205	3.32626	3.1078	2.87832	2.39593	1.95456	1.76611	1.60823	1.42663	-1.34169	-0.335423	-2.21543	-0.335671	0.671094		200	0.027	1.656	0.581	0	0	0	0	0	0	0	0	0
391	TAN2206_SW-64_35-36cm	2024-05-10 13:28:14	35.5	80.2	99.6	116	136	188	255	290	323	363	0.0802	0.0996	0.116	0.136	0.188	0.255	0.29	0.323	0.363	3.64025	3.32771	3.1078	2.87832	2.4112	1.97143	1.78588	1.63039	1.46196	-1.32193	-0.330482	-2.1783	-0.330045	0.660527		199	-0.16	1.648	0.503	0	0	0	0	0	0	0	0	0
392	TAN2206_SW-64_35-36cm	2024-05-10 13:28:39	35.5	79.8	99.2	115	135	188	254	290	323	363	0.0798	0.0992	0.115	0.135	0.188	0.254	0.29	0.323	0.363	3.64747	3.33352	3.12029	2.88897	2.4112	1.9771	1.78588	1.63039	1.46196	-1.33442	-0.333605	-2.18551	-0.331138	0.664742		199	-0.15	1.649	0.512	0	0	0	0	0	0	0	0	0
393	TAN2206_SW-64_35-36cm	2024-05-10 13:29:02	35.5	79.9	99.4	116	136	189	257	294	328	372	0.0799	0.0994	0.116	0.136	0.189	0.257	0.294	0.328	0.372	3.64566	3.33061	3.1078	2.87832	2.40354	1.96016	1.76611	1.60823	1.42663	-1.34169	-0.335423	-2.21904	-0.336217	0.67164		200	0.038	1.659	0.587	0	0	0	0	0	0	0	0	0
394	TAN2206_SW-64_35-36cm	2024-05-10 13:29:26	35.5	81.3	101	117	138	192	261	298	334	378	0.0813	0.101	0.117	0.138	0.192	0.261	0.298	0.334	0.378	3.6206	3.30757	3.09542	2.85726	2.38082	1.93788	1.74662	1.58208	1.40354	-1.3488	-0.337201	-2.21706	-0.335918	0.673119		202	0.04	1.659	0.595	0	0	0	0	0	0	0	0	0
395	TAN2206_SW-64_35-36cm	2024-05-10 13:29:49	35.5	80.5	99.5	115	135	187	253	288	320	360	0.0805	0.0995	0.115	0.135	0.187	0.253	0.288	0.32	0.36	3.63487	3.32916	3.12029	2.88897	2.41889	1.98279	1.79586	1.64386	1.47393	-1.32443	-0.331109	-2.16094	-0.327415	0.658523		198	-0.137	1.644	0.514	0	0	0	0	0	0	0	0	0
396	Average of 'TAN2206_SW-64_35-36cm'	2024-05-10 13:26:08	35.5	79.9	99.3	115	135	188	255	291	325	366	0.0799	0.0993	0.115	0.135	0.188	0.255	0.291	0.325	0.366	3.64566	3.33206	3.12029	2.88897	2.4112	1.97143	1.78091	1.62149	1.45008	-1.33939	-0.334846	-2.19558	-0.332663	0.667509		199	-0.057	1.652	0.547	0	0	0	0	0	0	0	0	0
397	TAN2206_SW-64_36-37cm	2024-05-10 13:42:46	36.5	87.2	106	123	144	199	268	306	342	387	0.0872	0.106	0.123	0.144	0.199	0.268	0.306	0.342	0.387	3.51953	3.23786	3.02327	2.79586	2.32916	1.8997	1.7084	1.54793	1.36959	-1.31487	-0.328718	-2.14993	-0.325748	0.654466		208	0.027	1.65	0.574	0	0	0	0	0	0	0	0	0
398	TAN2206_SW-64_36-37cm	2024-05-10 13:43:11	36.5	86.9	105	121	142	195	263	300	334	378	0.0869	0.105	0.121	0.142	0.195	0.263	0.3	0.334	0.378	3.5245	3.25154	3.04692	2.81604	2.35845	1.92687	1.73697	1.58208	1.40354	-1.30996	-0.327489	-2.12096	-0.321357	0.648846		204	0.048	1.645	0.57	0	0	0	0	0	0	0	0	0
399	TAN2206_SW-64_36-37cm	2024-05-10 13:43:35	36.5	87.6	107	123	145	199	268	305	341	385	0.0876	0.107	0.123	0.145	0.199	0.268	0.305	0.341	0.385	3.51293	3.22432	3.02327	2.78588	2.32916	1.8997	1.71312	1.55216	1.37707	-1.31015	-0.327538	-2.13586	-0.323614	0.651152		209	0.016	1.646	0.562	0	0	0	0	0	0	0	0	0
400	TAN2206_SW-64_36-37cm	2024-05-10 13:43:58	36.5	87.5	106	123	144	197	266	303	339	383	0.0875	0.106	0.123	0.144	0.197	0.266	0.303	0.339	0.383	3.51457	3.23786	3.02327	2.79586	2.34373	1.9105	1.72261	1.56064	1.38458	-1.30066	-0.325165	-2.12999	-0.322726	0.647891		206	0.044	1.646	0.577	0	0	0	0	0	0	0	0	0
401	TAN2206_SW-64_36-37cm	2024-05-10 13:44:23	36.5	87.3	106	123	144	199	268	305	341	386	0.0873	0.106	0.123	0.144	0.199	0.268	0.305	0.341	0.386	3.51787	3.23786	3.02327	2.79586	2.32916	1.8997	1.71312	1.55216	1.37333	-1.31015	-0.327538	-2.14455	-0.324931	0.652469		208	0.026	1.651	0.567	0	0	0	0	0	0	0	0	0
402	TAN2206_SW-64_36-37cm	2024-05-10 13:44:46	36.5	87.7	107	124	145	199	268	305	340	382	0.0877	0.107	0.124	0.145	0.199	0.268	0.305	0.34	0.382	3.51128	3.22432	3.01159	2.78588	2.32916	1.8997	1.71312	1.55639	1.38836	-1.29847	-0.324617	-2.12292	-0.321655	0.646272		210	-0.063	1.644	0.523	0	0	0	0	0	0	0	0	0
403	TAN2206_SW-64_36-37cm	2024-05-10 13:45:10	36.5	87.4	107	123	145	199	269	307	342	387	0.0874	0.107	0.123	0.145	0.199	0.269	0.307	0.342	0.387	3.51622	3.22432	3.02327	2.78588	2.32916	1.89432	1.70369	1.54793	1.36959	-1.31958	-0.329895	-2.14663	-0.325247	0.655142		209	0.022	1.651	0.57	0	0	0	0	0	0	0	0	0
404	TAN2206_SW-64_36-37cm	2024-05-10 13:45:33	36.5	88.1	107	124	145	200	269	307	342	387	0.0881	0.107	0.124	0.145	0.2	0.269	0.307	0.342	0.387	3.50471	3.22432	3.01159	2.78588	2.32193	1.89432	1.70369	1.54793	1.36959	-1.3079	-0.326975	-2.13512	-0.323503	0.650478		209	0.015	1.647	0.563	0	0	0	0	0	0	0	0	0
405	TAN2206_SW-64_36-37cm	2024-05-10 13:45:58	36.5	87.4	106	123	144	198	267	304	340	384	0.0874	0.106	0.123	0.144	0.198	0.267	0.304	0.34	0.384	3.51622	3.23786	3.02327	2.79586	2.33643	1.90509	1.71786	1.55639	1.38082	-1.30541	-0.326353	-2.1354	-0.323546	0.649899		208	0.023	1.647	0.564	0	0	0	0	0	0	0	0	0
406	TAN2206_SW-64_36-37cm	2024-05-10 13:46:23	36.5	87.2	106	122	143	197	266	303	339	383	0.0872	0.106	0.122	0.143	0.197	0.266	0.303	0.339	0.383	3.51953	3.23786	3.03505	2.80591	2.34373	1.9105	1.72261	1.56064	1.38458	-1.31244	-0.328109	-2.13494	-0.323476	0.651586		206	0.045	1.65	0.574	0	0	0	0	0	0	0	0	0
407	Average of 'TAN2206_SW-64_36-37cm'	2024-05-10 13:42:46	36.5	87.4	106	123	144	198	267	305	340	384	0.0874	0.106	0.123	0.144	0.198	0.267	0.305	0.34	0.384	3.51622	3.23786	3.02327	2.79586	2.33643	1.90509	1.71312	1.55639	1.38082	-1.31015	-0.327538	-2.1354	-0.323546	0.651083		208	0.022	1.648	0.565	0	0	0	0	0	0	0	0	0
408	TAN2206_SW-64_37-38cm	2024-05-10 14:00:04	37.5	83.7	101	115	134	183	244	277	307	346	0.0837	0.101	0.115	0.134	0.183	0.244	0.277	0.307	0.346	3.57863	3.30757	3.12029	2.8997	2.45008	2.03505	1.85204	1.70369	1.53116	-1.26825	-0.317063	-2.04747	-0.310223	0.627286		191	-0.017	1.615	0.54	0	0	0	0	0	0	0	0	0
409	TAN2206_SW-64_37-38cm	2024-05-10 14:00:28	37.5	79.5	97.6	112	131	180	242	275	306	345	0.0795	0.0976	0.112	0.131	0.18	0.242	0.275	0.306	0.345	3.6529	3.35698	3.15843	2.93236	2.47393	2.04692	1.8625	1.7084	1.53533	-1.29593	-0.323983	-2.11757	-0.320844	0.644827		188	-0.015	1.648	0.535	0	0	0	0	0	0	0	0	0
410	TAN2206_SW-64_37-38cm	2024-05-10 14:00:52	37.5	83.3	101	115	133	181	240	272	302	340	0.0833	0.101	0.115	0.133	0.181	0.24	0.272	0.302	0.34	3.58554	3.30757	3.12029	2.9105	2.46594	2.05889	1.87832	1.72738	1.55639	-1.24197	-0.310493	-2.02915	-0.307446	0.61794		188	0.028	1.623	0.517	0	0	0	0	0	0	0	0	0
411	TAN2206_SW-64_37-38cm	2024-05-10 14:01:15	37.5	83.5	100	115	133	182	242	275	305	343	0.0835	0.1	0.115	0.133	0.182	0.242	0.275	0.305	0.343	3.58208	3.32193	3.12029	2.9105	2.45799	2.04692	1.8625	1.71312	1.54372	-1.2578	-0.314449	-2.03836	-0.308842	0.623292		189	-0.009	1.614	0.534	0	0	0	0	0	0	0	0	0
412	TAN2206_SW-64_37-38cm	2024-05-10 14:01:40	37.5	80.6	98.7	114	132	182	245	279	310	349	0.0806	0.0987	0.114	0.132	0.182	0.245	0.279	0.31	0.349	3.63308	3.34081	3.13289	2.92139	2.45799	2.02915	1.84166	1.68966	1.5187	-1.29123	-0.322808	-2.11438	-0.32036	0.643168		190	-0.031	1.647	0.538	0	0	0	0	0	0	0	0	0
413	TAN2206_SW-64_37-38cm	2024-05-10 14:02:03	37.5	81	99.3	114	133	184	247	282	312	351	0.081	0.0993	0.114	0.133	0.184	0.247	0.282	0.312	0.351	3.62593	3.33206	3.13289	2.9105	2.44222	2.01742	1.82623	1.68038	1.51046	-1.30666	-0.326665	-2.11548	-0.320527	0.647192		192	-0.057	1.647	0.526	0	0	0	0	0	0	0	0	0
414	TAN2206_SW-64_37-38cm	2024-05-10 14:02:27	37.5	80.6	98.7	114	132	182	245	279	309	349	0.0806	0.0987	0.114	0.132	0.182	0.245	0.279	0.309	0.349	3.63308	3.34081	3.13289	2.92139	2.45799	2.02915	1.84166	1.69432	1.5187	-1.29123	-0.322808	-2.11438	-0.32036	0.643168		190	-0.032	1.647	0.537	0	0	0	0	0	0	0	0	0
415	TAN2206_SW-64_37-38cm	2024-05-10 14:02:52	37.5	79.6	97.9	113	131	181	243	277	308	347	0.0796	0.0979	0.113	0.131	0.181	0.243	0.277	0.308	0.347	3.65109	3.35255	3.14561	2.93236	2.46594	2.04097	1.85204	1.699	1.52699	-1.29356	-0.323391	-2.1241	-0.321833	0.645223		189	-0.022	1.651	0.537	0	0	0	0	0	0	0	0	0
416	TAN2206_SW-64_37-38cm	2024-05-10 14:03:18	37.5	83.4	101	115	133	181	240	271	302	340	0.0834	0.101	0.115	0.133	0.181	0.24	0.271	0.302	0.34	3.58381	3.30757	3.12029	2.9105	2.46594	2.05889	1.88364	1.72738	1.55639	-1.23666	-0.309165	-2.02742	-0.307184	0.616349		188	0.024	1.623	0.511	0	0	0	0	0	0	0	0	0
417	TAN2206_SW-64_37-38cm	2024-05-10 14:03:43	37.5	84	101	116	135	183	243	274	305	343	0.084	0.101	0.116	0.135	0.183	0.243	0.274	0.305	0.343	3.57347	3.30757	3.1078	2.88897	2.45008	2.04097	1.86775	1.71312	1.54372	-1.24005	-0.310013	-2.02975	-0.307537	0.61755		190	0.004	1.624	0.502	0	0	0	0	0	0	0	0	0
418	Average of 'TAN2206_SW-64_37-38cm'	2024-05-10 14:00:04	37.5	81.8	99.6	114	133	182	243	276	307	345	0.0818	0.0996	0.114	0.133	0.182	0.243	0.276	0.307	0.345	3.61176	3.32771	3.13289	2.9105	2.45799	2.04097	1.85726	1.70369	1.53533	-1.27563	-0.318909	-2.07642	-0.31461	0.633518		190	-0.009	1.634	0.529	0	0	0	0	0	0	0	0	0
419	TAN2206_SW-64_38-38.5cm	2024-05-10 14:16:11	38.5	16.2	38.7	86.4	112	164	225	256	285	321	0.0162	0.0387	0.0864	0.112	0.164	0.225	0.256	0.285	0.321	5.94786	4.69152	3.53282	3.15843	2.60823	2.152	1.96578	1.81097	1.63935	-1.56704	-0.39176	-4.30851	-0.652804	1.04456		183	-0.339	2.445	0.154	0	0	0	0	0.04	0.12	0.18	0.23	0.32
420	TAN2206_SW-64_38-38.5cm	2024-05-10 14:16:35	38.5	16.3	39.2	86.4	112	165	227	259	289	326	0.0163	0.0392	0.0864	0.112	0.165	0.227	0.259	0.289	0.326	5.93898	4.673	3.53282	3.15843	2.59946	2.13924	1.94898	1.79086	1.61706	-1.58385	-0.395962	-4.32193	-0.654838	1.0508		185	-0.301	2.45	0.185	0	0	0	0	0.04	0.12	0.18	0.23	0.31
421	TAN2206_SW-64_38-38.5cm	2024-05-10 14:17:00	38.5	15.9	37.4	85.3	111	162	223	254	283	318	0.0159	0.0374	0.0853	0.111	0.162	0.223	0.254	0.283	0.318	5.97483	4.74082	3.55131	3.17137	2.62593	2.16488	1.9771	1.82113	1.6529	-1.57421	-0.393553	-4.32193	-0.654838	1.04839		182	-0.328	2.451	0.159	0	0	0	0	0.04	0.12	0.19	0.23	0.32
422	TAN2206_SW-64_38-38.5cm	2024-05-10 14:17:24	38.5	16.7	40.8	87.6	113	165	226	258	287	323	0.0167	0.0408	0.0876	0.113	0.165	0.226	0.258	0.287	0.323	5.90401	4.61529	3.51293	3.14561	2.59946	2.14561	1.95456	1.80088	1.63039	-1.55837	-0.389592	-4.27361	-0.647517	1.03711		184	-0.312	2.429	0.162	0	0	0	0	0.04	0.11	0.18	0.22	0.31
423	TAN2206_SW-64_38-38.5cm	2024-05-10 14:17:50	38.5	15.9	37.5	84.8	111	163	224	256	286	322	0.0159	0.0375	0.0848	0.111	0.163	0.224	0.256	0.286	0.322	5.97483	4.73697	3.55979	3.17137	2.61706	2.15843	1.96578	1.80591	1.63487	-1.59401	-0.398502	-4.33996	-0.65757	1.05607		183	-0.318	2.459	0.181	0	0	0	0	0.04	0.12	0.19	0.23	0.32
424	TAN2206_SW-64_38-38.5cm	2024-05-10 14:18:16	38.5	15.9	37.3	85.6	112	164	225	256	285	320	0.0159	0.0373	0.0856	0.112	0.164	0.225	0.256	0.285	0.32	5.97483	4.74468	3.54625	3.15843	2.60823	2.152	1.96578	1.81097	1.64386	-1.58046	-0.395115	-4.33097	-0.656208	1.05132		185	-0.361	2.457	0.136	0	0	0	0	0.04	0.12	0.19	0.23	0.32
425	TAN2206_SW-64_38-38.5cm	2024-05-10 14:18:39	38.5	16.2	38.3	86.2	112	163	224	255	284	319	0.0162	0.0383	0.0862	0.112	0.163	0.224	0.255	0.284	0.319	5.94786	4.70651	3.53617	3.15843	2.61706	2.15843	1.97143	1.81604	1.64837	-1.56474	-0.391184	-4.29949	-0.651438	1.04262		183	-0.341	2.444	0.149	0	0	0	0	0.04	0.12	0.18	0.23	0.32
426	TAN2206_SW-64_38-38.5cm	2024-05-10 14:19:03	38.5	15.8	37.1	84.4	110	163	225	257	288	326	0.0158	0.0371	0.0844	0.11	0.163	0.225	0.257	0.288	0.326	5.98393	4.75244	3.56661	3.18442	2.61706	2.152	1.96016	1.79586	1.61706	-1.60645	-0.401613	-4.36688	-0.661648	1.06326		182	-0.248	2.467	0.226	0	0	0	0	0.05	0.12	0.19	0.24	0.32
427	TAN2206_SW-64_38-38.5cm	2024-05-10 14:19:26	38.5	15.9	37.6	85.2	111	163	224	256	285	320	0.0159	0.0376	0.0852	0.111	0.163	0.224	0.256	0.285	0.32	5.97483	4.73312	3.553	3.17137	2.61706	2.15843	1.96578	1.81097	1.64386	-1.58722	-0.396805	-4.33097	-0.656208	1.05301		183	-0.346	2.456	0.157	0	0	0	0	0.05	0.12	0.19	0.23	0.32
428	TAN2206_SW-64_38-38.5cm	2024-05-10 14:19:52	38.5	16.3	38.7	86.5	112	164	225	256	285	320	0.0163	0.0387	0.0865	0.112	0.164	0.225	0.256	0.285	0.32	5.93898	4.69152	3.53116	3.15843	2.60823	2.152	1.96578	1.81097	1.64386	-1.56537	-0.391343	-4.29513	-0.650777	1.04212		184	-0.349	2.442	0.142	0	0	0	0	0.04	0.12	0.18	0.23	0.31
429	Average of 'TAN2206_SW-64_38-38.5cm'	2024-05-10 14:16:11	38.5	16.1	38.2	85.9	112	164	225	256	286	321	0.0161	0.0382	0.0859	0.112	0.164	0.225	0.256	0.286	0.321	5.9568	4.71028	3.5412	3.15843	2.60823	2.152	1.96578	1.80591	1.63935	-1.57541	-0.393853	-4.31744	-0.654158	1.04801		183	-0.322	2.45	0.166	0	0	0	0	0.04	0.12	0.18	0.23	0.32
[truncated: 40 more columns]

## Sheet: SW-80
Record Number	Sample Name	Measurement Date Time	Depth	Grainsize (μm)									Grainsize (mm)									Grainsize (Φ)									Graphical Standard Deviation						Mode	Kurtosis [3]	GSD [3]	Skew [3]	VOL% GRAINSIZE BINS
																																									<1 um	1-1.16 um	1.16-1.38 um	1.38-1.64 um	1.64-2 um	2-2.32 um	2.32-2.76 um	2.76-3.28 um	3.28-4 um
				Dx (5)	Dx (10)	Dx (16)	Dx (25)	Dx (50)	Dx (75)	Dx (84)	Dx (90)	Dx (95)	Dx (5)	Dx (10)	Dx (16)	Dx (25)	Dx (50)	Dx (75)	Dx (84)	Dx (90)	Dx (95)	Dx(5)	Dx (10)	Dx (16)	Dx (25)	Dx (50)	Dx (75)	Dx (84)	Dx (90)	Dx (95)	84-16	(84-16)/4	95-5	(95-5)/6.6	σ	Sorting					0.5	1.08	1.149	1.51	1.82	2.16	2.54	3.02	3.64
1	TAN2206_SW-80_0-1cm	2024-05-15 13:45:36	0.5	3.02	4.8	7.15	11.4	27	48.7	61	73.1	89.7	0.00302	0.0048	0.00715	0.0114	0.027	0.0487	0.061	0.0731	0.0897	8.37124	7.70275	7.12784	6.45482	5.2109	4.35993	4.03505	3.77398	3.47875	-3.09279	-0.773199	-4.89249	-0.741286	1.51448		40.8	1.363	2.819	1.203	0.29	0.16	0.27	0.44	0.88	0.9	1.28	1.53	2.02
2	TAN2206_SW-80_0-1cm	2024-05-15 13:45:59	0.5	3.02	4.79	7.13	11.4	26.9	48.6	61	73.3	90.3	0.00302	0.00479	0.00713	0.0114	0.0269	0.0486	0.061	0.0733	0.0903	8.37124	7.70576	7.13188	6.45482	5.21625	4.3629	4.03505	3.77004	3.46913	-3.09684	-0.774209	-4.90211	-0.742743	1.51695		40.6	1.692	2.825	1.266	0.29	0.16	0.27	0.44	0.88	0.9	1.29	1.53	2.03
3	TAN2206_SW-80_0-1cm	2024-05-15 13:46:23	0.5	3.02	4.8	7.15	11.4	27	48.9	61.4	73.7	90.9	0.00302	0.0048	0.00715	0.0114	0.027	0.0489	0.0614	0.0737	0.0909	8.37124	7.70275	7.12784	6.45482	5.2109	4.35402	4.02562	3.76219	3.45958	-3.10222	-0.775556	-4.91166	-0.744191	1.51975		40.6	1.728	2.828	1.274	0.29	0.16	0.27	0.44	0.88	0.9	1.28	1.53	2.02
4	TAN2206_SW-80_0-1cm	2024-05-15 13:46:48	0.5	3.03	4.81	7.16	11.4	27	48.9	61.3	73.5	90.2	0.00303	0.00481	0.00716	0.0114	0.027	0.0489	0.0613	0.0735	0.0902	8.36647	7.69975	7.12582	6.45482	5.2109	4.35402	4.02797	3.76611	3.47073	-3.09786	-0.774464	-4.89574	-0.741778	1.51624		40.8	1.361	2.821	1.205	0.28	0.16	0.27	0.44	0.88	0.9	1.28	1.52	2.02
5	TAN2206_SW-80_0-1cm	2024-05-15 13:47:12	0.5	3.02	4.8	7.14	11.4	26.9	48.7	61.1	73.2	89.9	0.00302	0.0048	0.00714	0.0114	0.0269	0.0487	0.0611	0.0732	0.0899	8.37124	7.70275	7.12986	6.45482	5.21625	4.35993	4.03268	3.77201	3.47554	-3.09718	-0.774294	-4.8957	-0.741773	1.51607		40.6	1.373	2.821	1.209	0.28	0.16	0.27	0.44	0.88	0.9	1.29	1.53	2.03
6	TAN2206_SW-80_0-1cm	2024-05-15 13:47:35	0.5	3.02	4.81	7.16	11.4	27	49	61.5	73.7	90.6	0.00302	0.00481	0.00716	0.0114	0.027	0.049	0.0615	0.0737	0.0906	8.37124	7.69975	7.12582	6.45482	5.2109	4.35107	4.02327	3.76219	3.46435	-3.10255	-0.775639	-4.90689	-0.743468	1.51911		40.9	1.355	2.825	1.206	0.28	0.16	0.27	0.44	0.88	0.9	1.28	1.52	2.02
7	TAN2206_SW-80_0-1cm	2024-05-15 13:47:59	0.5	3.02	4.8	7.15	11.4	26.9	48.7	61.3	73.7	91	0.00302	0.0048	0.00715	0.0114	0.0269	0.0487	0.0613	0.0737	0.091	8.37124	7.70275	7.12784	6.45482	5.21625	4.35993	4.02797	3.76219	3.45799	-3.09987	-0.774968	-4.91325	-0.744431	1.5194		40.4	1.831	2.828	1.297	0.29	0.16	0.27	0.44	0.88	0.9	1.29	1.53	2.02
8	TAN2206_SW-80_0-1cm	2024-05-15 13:48:22	0.5	3.02	4.8	7.15	11.4	27	48.6	60.9	73.1	89.8	0.00302	0.0048	0.00715	0.0114	0.027	0.0486	0.0609	0.0731	0.0898	8.37124	7.70275	7.12784	6.45482	5.2109	4.3629	4.03741	3.77398	3.47714	-3.09043	-0.772607	-4.89409	-0.74153	1.51414		40.6	1.403	2.819	1.213	0.29	0.16	0.28	0.45	0.88	0.9	1.29	1.52	2.02
9	TAN2206_SW-80_0-1cm	2024-05-15 13:48:48	0.5	3.02	4.82	7.18	11.5	27.1	48.9	61.3	73.4	90	0.00302	0.00482	0.00718	0.0115	0.0271	0.0489	0.0613	0.0734	0.09	8.37124	7.69675	7.1218	6.44222	5.20556	4.35402	4.02797	3.76808	3.47393	-3.09383	-0.773458	-4.8973	-0.742016	1.51547		40.9	1.328	2.82	1.196	0.29	0.16	0.27	0.44	0.88	0.9	1.28	1.52	2.01
10	TAN2206_SW-80_0-1cm	2024-05-15 13:49:12	0.5	3.02	4.81	7.17	11.5	27	48.7	61.1	73.3	90.3	0.00302	0.00481	0.00717	0.0115	0.027	0.0487	0.0611	0.0733	0.0903	8.37124	7.69975	7.12381	6.44222	5.2109	4.35993	4.03268	3.77004	3.46913	-3.09113	-0.772782	-4.90211	-0.742743	1.51553		40.6	1.668	2.822	1.259	0.29	0.16	0.28	0.45	0.88	0.9	1.28	1.52	2.01
11	Average of 'TAN2206_SW-80_0-1cm'	2024-05-15 13:45:36	0.5	3.02	4.81	7.15	11.4	27	48.8	61.2	73.4	90.3	0.00302	0.00481	0.00715	0.0114	0.027	0.0488	0.0612	0.0734	0.0903	8.37124	7.69975	7.12784	6.45482	5.2109	4.35698	4.03032	3.76808	3.46913	-3.09752	-0.774379	-4.90211	-0.742743	1.51712		40.7	1.517	2.823	1.234	0.29	0.16	0.27	0.44	0.88	0.9	1.28	1.53	2.02
12	TAN2206_SW-80_1-2cm	2024-05-15 13:56:42	4.02	2.96	4.7	7	11.2	26.9	49	61.8	74.4	92.1	0.00296	0.0047	0.007	0.0112	0.0269	0.049	0.0618	0.0744	0.0921	8.40019	7.73312	7.15843	6.48036	5.21625	4.35107	4.01625	3.74855	3.44066	-3.14218	-0.785545	-4.95953	-0.751444	1.53699		40.7	1.802	2.862	1.299	0.34	0.17	0.29	0.46	0.9	0.91	1.31	1.56	2.07
13	TAN2206_SW-80_1-2cm	2024-05-15 13:57:07	4.02	2.96	4.7	6.99	11.2	26.8	49	61.7	74.3	92.2	0.00296	0.0047	0.00699	0.0112	0.0268	0.049	0.0617	0.0743	0.0922	8.40019	7.73312	7.16049	6.48036	5.22162	4.35107	4.01859	3.75049	3.43909	-3.14191	-0.785477	-4.9611	-0.751681	1.53716		40.7	1.885	2.863	1.316	0.34	0.17	0.29	0.46	0.9	0.91	1.31	1.56	2.07
14	TAN2206_SW-80_1-2cm	2024-05-15 13:57:32	4.02	2.96	4.71	7	11.2	26.8	49	61.7	74.2	91.7	0.00296	0.00471	0.007	0.0112	0.0268	0.049	0.0617	0.0742	0.0917	8.40019	7.73006	7.15843	6.48036	5.22162	4.35107	4.01859	3.75244	3.44693	-3.13984	-0.784961	-4.95325	-0.750493	1.53545		40.8	1.733	2.858	1.284	0.33	0.17	0.29	0.46	0.9	0.91	1.31	1.56	2.06
15	TAN2206_SW-80_1-2cm	2024-05-15 13:57:58	4.03	2.97	4.73	7.04	11.2	26.9	49.1	61.9	74.5	92.3	0.00297	0.00473	0.00704	0.0112	0.0269	0.0491	0.0619	0.0745	0.0923	8.39532	7.72394	7.15021	6.48036	5.21625	4.34813	4.01392	3.74662	3.43753	-3.13629	-0.784073	-4.9578	-0.751181	1.53525		40.7	1.786	2.859	1.297	0.33	0.17	0.29	0.46	0.9	0.91	1.3	1.55	2.05
16	TAN2206_SW-80_1-2cm	2024-05-15 13:58:23	4.02	2.98	4.74	7.06	11.3	27	49.2	62	74.5	92.2	0.00298	0.00474	0.00706	0.0113	0.027	0.0492	0.062	0.0745	0.0922	8.39047	7.7209	7.14612	6.46753	5.2109	4.3452	4.01159	3.74662	3.43909	-3.13453	-0.783632	-4.95138	-0.750209	1.53384		41	1.781	2.857	1.293	0.33	0.17	0.29	0.46	0.89	0.91	1.29	1.54	2.04
17	TAN2206_SW-80_1-2cm	2024-05-15 13:58:49	4.02	2.97	4.72	7.03	11.2	26.8	48.9	61.5	74	91.5	0.00297	0.00472	0.00703	0.0112	0.0268	0.0489	0.0615	0.074	0.0915	8.39532	7.727	7.15226	6.48036	5.22162	4.35402	4.02327	3.75633	3.45008	-3.12899	-0.782247	-4.94524	-0.749278	1.53153		40.6	1.762	2.853	1.289	0.33	0.17	0.29	0.46	0.9	0.91	1.3	1.55	2.05
18	TAN2206_SW-80_1-2cm	2024-05-15 13:59:14	4.02	2.98	4.76	7.09	11.4	27.1	49.3	62	74.6	92.3	0.00298	0.00476	0.00709	0.0114	0.0271	0.0493	0.062	0.0746	0.0923	8.39047	7.71482	7.14	6.45482	5.20556	4.34227	4.01159	3.74468	3.43753	-3.12841	-0.782103	-4.95295	-0.750446	1.53255		40.9	1.746	2.854	1.286	0.33	0.17	0.29	0.46	0.89	0.9	1.29	1.53	2.03
19	TAN2206_SW-80_1-2cm	2024-05-15 13:59:38	4.02	2.98	4.76	7.1	11.4	27.1	49.2	61.8	74.4	92	0.00298	0.00476	0.0071	0.0114	0.0271	0.0492	0.0618	0.0744	0.092	8.39047	7.71482	7.13797	6.45482	5.20556	4.3452	4.01625	3.74855	3.44222	-3.12172	-0.780429	-4.94825	-0.749735	1.53016		40.8	1.765	2.851	1.288	0.33	0.17	0.29	0.46	0.89	0.9	1.29	1.53	2.03
20	TAN2206_SW-80_1-2cm	2024-05-15 14:00:01	4.02	2.98	4.77	7.12	11.4	27.1	49.2	61.8	74.1	91.4	0.00298	0.00477	0.00712	0.0114	0.0271	0.0492	0.0618	0.0741	0.0914	8.39047	7.7118	7.13391	6.45482	5.20556	4.3452	4.01625	3.75438	3.45166	-3.11766	-0.779414	-4.93881	-0.748305	1.52772		41.1	1.619	2.846	1.253	0.33	0.17	0.29	0.46	0.89	0.9	1.28	1.53	2.02
21	TAN2206_SW-80_1-2cm	2024-05-15 14:00:25	4.02	2.98	4.76	7.1	11.4	27.1	49.1	61.7	74.2	91.6	0.00298	0.00476	0.0071	0.0114	0.0271	0.0491	0.0617	0.0742	0.0916	8.39047	7.71482	7.13797	6.45482	5.20556	4.34813	4.01859	3.75244	3.44851	-3.11938	-0.779845	-4.94196	-0.748782	1.52863		40.8	1.683	2.849	1.27	0.33	0.17	0.29	0.46	0.89	0.9	1.29	1.53	2.03
22	Average of 'TAN2206_SW-80_1-2cm'	2024-05-15 13:56:42	4.02	2.97	4.73	7.05	11.3	26.9	49.1	61.8	74.3	91.9	0.00297	0.00473	0.00705	0.0113	0.0269	0.0491	0.0618	0.0743	0.0919	8.39532	7.72394	7.14816	6.46753	5.21625	4.34813	4.01625	3.75049	3.44379	-3.13191	-0.782978	-4.95153	-0.750232	1.53321		40.8	1.758	2.855	1.288	0.33	0.17	0.29	0.46	0.89	0.91	1.3	1.54	2.04
23	TAN2206_SW-80_2-3cm	2024-05-15 14:08:11	3.96	2.88	4.65	7.04	11.5	28.1	51.2	64.4	77.4	95.5	0.00288	0.00465	0.00704	0.0115	0.0281	0.0512	0.0644	0.0774	0.0955	8.43972	7.74855	7.15021	6.44222	5.15329	4.28771	3.9568	3.69152	3.38836	-3.19341	-0.798353	-5.05136	-0.765358	1.56371		42.8	1.634	2.929	1.261	0.51	0.2	0.32	0.48	0.91	0.91	1.3	1.54	2.04
24	TAN2206_SW-80_2-3cm	2024-05-15 14:08:34	3.96	2.89	4.66	7.04	11.5	28.1	51.1	64.3	77.2	95.3	0.00289	0.00466	0.00704	0.0115	0.0281	0.0511	0.0643	0.0772	0.0953	8.43471	7.74545	7.15021	6.44222	5.15329	4.29053	3.95904	3.69526	3.39138	-3.19117	-0.797793	-5.04333	-0.764142	1.56193		42.7	1.636	2.925	1.261	0.5	0.2	0.32	0.48	0.91	0.91	1.3	1.54	2.04
25	TAN2206_SW-80_2-3cm	2024-05-15 14:09:00	3.96	2.9	4.68	7.07	11.5	28.1	51.1	64.1	76.7	94.3	0.0029	0.00468	0.00707	0.0115	0.0281	0.0511	0.0641	0.0767	0.0943	8.42973	7.73928	7.14407	6.44222	5.15329	4.29053	3.96353	3.70463	3.4066	-3.18054	-0.795136	-5.02313	-0.761081	1.55622		42.9	1.215	2.913	1.176	0.49	0.2	0.32	0.48	0.9	0.91	1.29	1.53	2.02
26	TAN2206_SW-80_2-3cm	2024-05-15 14:09:23	3.97	2.91	4.71	7.13	11.6	28.4	51.4	64.5	77.3	94.9	0.00291	0.00471	0.00713	0.0116	0.0284	0.0514	0.0645	0.0773	0.0949	8.42477	7.73006	7.13188	6.42973	5.13797	4.28209	3.95456	3.69339	3.39745	-3.17733	-0.794331	-5.02732	-0.761715	1.55605		43.2	1.425	2.915	1.21	0.49	0.2	0.32	0.48	0.9	0.9	1.28	1.52	2.01
27	TAN2206_SW-80_2-3cm	2024-05-15 14:09:47	3.98	2.91	4.72	7.15	11.7	28.3	51.4	64.6	77.7	95.7	0.00291	0.00472	0.00715	0.0117	0.0283	0.0514	0.0646	0.0777	0.0957	8.42477	7.727	7.12784	6.41735	5.14305	4.28209	3.95232	3.68594	3.38534	-3.17552	-0.79388	-5.03943	-0.76355	1.55743		42.9	1.591	2.917	1.249	0.48	0.2	0.32	0.48	0.9	0.9	1.28	1.52	2
28	TAN2206_SW-80_2-3cm	2024-05-15 14:10:10	3.97	2.92	4.73	7.17	11.7	28.4	51.6	64.8	77.9	96	0.00292	0.00473	0.00717	0.0117	0.0284	0.0516	0.0648	0.0779	0.096	8.41982	7.72394	7.12381	6.41735	5.13797	4.27649	3.94786	3.68223	3.38082	-3.17595	-0.793987	-5.03899	-0.763484	1.55747		43	1.594	2.919	1.25	0.48	0.2	0.32	0.48	0.89	0.9	1.27	1.51	1.99
29	TAN2206_SW-80_2-3cm	2024-05-15 14:10:36	3.98	2.92	4.73	7.18	11.7	28.4	51.5	64.7	77.6	95.6	0.00292	0.00473	0.00718	0.0117	0.0284	0.0515	0.0647	0.0776	0.0956	8.41982	7.72394	7.1218	6.41735	5.13797	4.27928	3.95009	3.6878	3.38685	-3.17171	-0.792927	-5.03297	-0.762571	1.5555		42.9	1.584	2.914	1.245	0.48	0.2	0.32	0.48	0.89	0.89	1.27	1.51	1.99
30	TAN2206_SW-80_2-3cm	2024-05-15 14:10:59	3.98	2.91	4.72	7.16	11.7	28.3	51.2	64.3	77.1	94.8	0.00291	0.00472	0.00716	0.0117	0.0283	0.0512	0.0643	0.0771	0.0948	8.42477	7.727	7.12582	6.41735	5.14305	4.28771	3.95904	3.69713	3.39897	-3.16679	-0.791697	-5.0258	-0.761484	1.55318		42.7	1.234	2.907	1.181	0.48	0.2	0.32	0.48	0.9	0.9	1.28	1.51	1.99
31	TAN2206_SW-80_2-3cm	2024-05-15 14:11:25	3.98	2.91	4.73	7.18	11.7	28.3	51.2	64.2	76.9	94.5	0.00291	0.00473	0.00718	0.0117	0.0283	0.0512	0.0642	0.0769	0.0945	8.42477	7.72394	7.1218	6.41735	5.14305	4.28771	3.96128	3.70087	3.40354	-3.16052	-0.790129	-5.02122	-0.760791	1.55092		42.7	1.222	2.904	1.176	0.49	0.2	0.32	0.48	0.9	0.9	1.27	1.51	1.99
32	TAN2206_SW-80_2-3cm	2024-05-15 14:11:48	3.98	2.91	4.73	7.19	11.7	28.4	51.3	64.3	76.9	94.5	0.00291	0.00473	0.00719	0.0117	0.0284	0.0513	0.0643	0.0769	0.0945	8.42477	7.72394	7.11979	6.41735	5.13797	4.2849	3.95904	3.70087	3.40354	-3.16076	-0.790189	-5.02122	-0.760791	1.55098		43	1.199	2.904	1.17	0.48	0.2	0.32	0.48	0.9	0.9	1.27	1.51	1.98
33	Average of 'TAN2206_SW-80_2-3cm'	2024-05-15 14:08:11	3.97	2.91	4.7	7.13	11.6	28.3	51.3	64.4	77.3	95.1	0.00291	0.0047	0.00713	0.0116	0.0283	0.0513	0.0644	0.0773	0.0951	8.42477	7.73312	7.13188	6.42973	5.14305	4.2849	3.9568	3.69339	3.39441	-3.17509	-0.793772	-5.03035	-0.762175	1.55595		42.9	1.443	2.915	1.219	0.49	0.2	0.32	0.48	0.9	0.9	1.28	1.52	2.01
34	TAN2206_SW-80_3-4cm	2024-05-15 14:19:04	3.88	3.05	4.91	7.4	12	29	52.4	65.5	78.5	96	0.00305	0.00491	0.0074	0.012	0.029	0.0524	0.0655	0.0785	0.096	8.35698	7.67006	7.07826	6.38082	5.1078	4.25429	3.93236	3.67116	3.38082	-3.1459	-0.786474	-4.97615	-0.753963	1.54044		44	1.123	2.875	1.152	0.33	0.17	0.28	0.44	0.85	0.87	1.24	1.47	1.95
35	TAN2206_SW-80_3-4cm	2024-05-15 14:19:27	3.89	3.05	4.9	7.37	12	28.9	52.3	65.6	78.9	96.9	0.00305	0.0049	0.00737	0.012	0.0289	0.0523	0.0656	0.0789	0.0969	8.35698	7.673	7.08412	6.38082	5.11279	4.25705	3.93016	3.66383	3.36736	-3.15396	-0.78849	-4.98962	-0.756002	1.54449		43.7	1.557	2.884	1.242	0.33	0.17	0.28	0.44	0.86	0.87	1.24	1.48	1.95
36	TAN2206_SW-80_3-4cm	2024-05-15 14:19:51	3.9	3.07	4.94	7.45	12.1	29.2	52.9	66.3	79.6	97.5	0.00307	0.00494	0.00745	0.0121	0.0292	0.0529	0.0663	0.0796	0.0975	8.34755	7.66127	7.06854	6.36885	5.09789	4.24059	3.91485	3.65109	3.35845	-3.1537	-0.788424	-4.98909	-0.755923	1.54435		44.4	1.494	2.885	1.226	0.32	0.17	0.28	0.44	0.85	0.86	1.23	1.46	1.93
37	TAN2206_SW-80_3-4cm	2024-05-15 14:20:15	3.91	3.07	4.94	7.45	12.1	29.1	52.5	65.8	79.1	97.2	0.00307	0.00494	0.00745	0.0121	0.0291	0.0525	0.0658	0.0791	0.0972	8.34755	7.66127	7.06854	6.36885	5.10284	4.25154	3.92577	3.66018	3.3629	-3.14278	-0.785694	-4.98465	-0.755249	1.54094		43.7	1.607	2.879	1.249	0.32	0.17	0.28	0.44	0.85	0.86	1.23	1.46	1.93
38	TAN2206_SW-80_3-4cm	2024-05-15 14:20:38	3.91	3.07	4.96	7.49	12.2	29.3	52.9	66.3	79.7	97.7	0.00307	0.00496	0.00749	0.0122	0.0293	0.0529	0.0663	0.0797	0.0977	8.34755	7.65544	7.06082	6.35698	5.09296	4.24059	3.91485	3.64928	3.3555	-3.14597	-0.786493	-4.99205	-0.756371	1.54286		44.2	1.538	2.882	1.235	0.32	0.17	0.28	0.44	0.85	0.86	1.22	1.45	1.92
39	TAN2206_SW-80_3-4cm	2024-05-15 14:21:02	3.92	3.07	4.95	7.47	12.1	29.1	52.5	65.7	78.7	96.2	0.00307	0.00495	0.00747	0.0121	0.0291	0.0525	0.0657	0.0787	0.0962	8.34755	7.65836	7.06468	6.36885	5.10284	4.25154	3.92796	3.66749	3.37782	-3.13671	-0.784178	-4.96973	-0.752989	1.53717		44.1	1.113	2.87	1.149	0.32	0.17	0.28	0.44	0.85	0.86	1.23	1.45	1.92
40	TAN2206_SW-80_3-4cm	2024-05-15 14:21:25	3.92	3.08	4.98	7.53	12.3	29.4	52.9	66.3	79.6	97.5	0.00308	0.00498	0.00753	0.0123	0.0294	0.0529	0.0663	0.0796	0.0975	8.34285	7.64964	7.05313	6.3452	5.08804	4.24059	3.91485	3.65109	3.35845	-3.13829	-0.784572	-4.9844	-0.755212	1.53978		44.2	1.481	2.878	1.221	0.32	0.17	0.28	0.44	0.84	0.86	1.22	1.44	1.9
41	TAN2206_SW-80_3-4cm	2024-05-15 14:21:51	3.91	3.08	4.98	7.53	12.2	29.3	52.6	65.7	78.6	95.9	0.00308	0.00498	0.00753	0.0122	0.0293	0.0526	0.0657	0.0786	0.0959	8.34285	7.64964	7.05313	6.35698	5.09296	4.24879	3.92796	3.66933	3.38233	-3.12517	-0.781293	-4.96053	-0.751595	1.53289		44.3	1.074	2.864	1.134	0.32	0.17	0.28	0.44	0.85	0.86	1.22	1.44	1.9
42	TAN2206_SW-80_3-4cm	2024-05-15 14:22:14	3.91	3.08	4.98	7.54	12.3	29.4	52.8	65.9	79	96.7	0.00308	0.00498	0.00754	0.0123	0.0294	0.0528	0.0659	0.079	0.0967	8.34285	7.64964	7.05122	6.3452	5.08804	4.24332	3.92358	3.662	3.37034	-3.12764	-0.781911	-4.97251	-0.753411	1.53532		44.2	1.446	2.871	1.208	0.32	0.17	0.28	0.44	0.85	0.86	1.22	1.44	1.9
43	TAN2206_SW-80_3-4cm	2024-05-15 14:22:38	3.91	3.08	5	7.57	12.3	29.5	53	66.2	79.5	97.4	0.00308	0.005	0.00757	0.0123	0.0295	0.053	0.0662	0.0795	0.0974	8.34285	7.64386	7.04549	6.3452	5.08314	4.23786	3.91702	3.6529	3.35993	-3.12847	-0.782117	-4.98292	-0.754988	1.5371		44.2	1.49	2.875	1.22	0.32	0.17	0.28	0.44	0.84	0.85	1.21	1.43	1.89
44	Average of 'TAN2206_SW-80_3-4cm'	2024-05-15 14:19:04	3.91	3.07	4.95	7.48	12.2	29.2	52.7	65.9	79.1	96.9	0.00307	0.00495	0.00748	0.0122	0.0292	0.0527	0.0659	0.0791	0.0969	8.34755	7.65836	7.06275	6.35698	5.09789	4.24605	3.92358	3.66018	3.36736	-3.13917	-0.784792	-4.98019	-0.754574	1.53937		44.1	1.404	2.876	1.205	0.32	0.17	0.28	0.44	0.85	0.86	1.23	1.45	1.92
45	TAN2206_SW-80_4-5cm	2024-05-15 14:30:01	4.05	2.95	4.8	7.34	12.1	29.3	52.6	65.8	78.7	96.1	0.00295	0.0048	0.00734	0.0121	0.0293	0.0526	0.0658	0.0787	0.0961	8.40507	7.70275	7.09	6.36885	5.09296	4.24879	3.92577	3.66749	3.37932	-3.16424	-0.791059	-5.02575	-0.761477	1.55254		44.3	1.062	2.907	1.132	0.44	0.19	0.3	0.47	0.89	0.89	1.27	1.49	1.95
46	TAN2206_SW-80_4-5cm	2024-05-15 14:30:24	4.05	2.96	4.81	7.35	12.1	29.4	52.9	66.2	79.5	97.5	0.00296	0.00481	0.00735	0.0121	0.0294	0.0529	0.0662	0.0795	0.0975	8.40019	7.69975	7.08804	6.36885	5.08804	4.24059	3.91702	3.6529	3.35845	-3.17102	-0.792754	-5.04173	-0.763899	1.55665		44.2	1.486	2.917	1.22	0.43	0.18	0.3	0.46	0.89	0.89	1.26	1.49	1.95
47	TAN2206_SW-80_4-5cm	2024-05-15 14:30:48	4.07	2.98	4.86	7.43	12.3	29.7	53.4	66.9	80.5	98.7	0.00298	0.00486	0.00743	0.0123	0.0297	0.0534	0.0669	0.0805	0.0987	8.39047	7.68483	7.07242	6.3452	5.07339	4.22702	3.90185	3.63487	3.34081	-3.17057	-0.792643	-5.04967	-0.765101	1.55774		44.5	1.518	2.92	1.229	0.43	0.18	0.3	0.46	0.88	0.88	1.25	1.47	1.93
48	TAN2206_SW-80_4-5cm	2024-05-15 14:31:11	4.07	2.97	4.84	7.39	12.2	29.4	52.8	66	79	96.5	0.00297	0.00484	0.00739	0.0122	0.0294	0.0528	0.066	0.079	0.0965	8.39532	7.69078	7.08021	6.35698	5.08804	4.24332	3.92139	3.662	3.37333	-3.15882	-0.789705	-5.02199	-0.760908	1.55061		44.4	1.078	2.904	1.137	0.43	0.18	0.3	0.46	0.88	0.89	1.25	1.47	1.93
49	TAN2206_SW-80_4-5cm	2024-05-15 14:31:35	4.07	2.98	4.86	7.44	12.3	29.5	53.1	66.3	79.4	96.8	0.00298	0.00486	0.00744	0.0123	0.0295	0.0531	0.0663	0.0794	0.0968	8.39047	7.68483	7.07048	6.3452	5.08314	4.23514	3.91485	3.65472	3.36885	-3.15563	-0.788909	-5.02162	-0.760852	1.54976		44.5	1.062	2.904	1.133	0.43	0.18	0.3	0.46	0.88	0.88	1.25	1.47	1.92
50	TAN2206_SW-80_4-5cm	2024-05-15 14:32:00	4.07	2.98	4.88	7.47	12.3	29.6	53.2	66.4	79.5	97	0.00298	0.00488	0.00747	0.0123	0.0296	0.0532	0.0664	0.0795	0.097	8.39047	7.6789	7.06468	6.3452	5.07826	4.23243	3.91267	3.6529	3.36587	-3.152	-0.788001	-5.0246	-0.761303	1.5493		44.6	1.054	2.903	1.131	0.43	0.18	0.3	0.46	0.88	0.88	1.24	1.46	1.91
51	TAN2206_SW-80_4-5cm	2024-05-15 14:32:24	4.08	2.99	4.9	7.52	12.4	29.8	53.4	66.6	79.9	97.6	0.00299	0.0049	0.00752	0.0124	0.0298	0.0534	0.0666	0.0799	0.0976	8.38564	7.673	7.05505	6.33352	5.06854	4.22702	3.90833	3.64566	3.35698	-3.14672	-0.786679	-5.02866	-0.761919	1.5486		44.6	1.424	2.905	1.2	0.43	0.18	0.3	0.46	0.87	0.87	1.24	1.45	1.9
52	TAN2206_SW-80_4-5cm	2024-05-15 14:32:47	4.08	3	4.91	7.55	12.5	29.9	53.6	67	80.5	98.4	0.003	0.00491	0.00755	0.0125	0.0299	0.0536	0.067	0.0805	0.0984	8.38082	7.67006	7.04931	6.32193	5.06371	4.22162	3.8997	3.63487	3.3452	-3.14961	-0.787403	-5.03562	-0.762973	1.55038		44.6	1.419	2.909	1.203	0.42	0.18	0.3	0.46	0.87	0.87	1.23	1.45	1.89
53	TAN2206_SW-80_4-5cm	2024-05-15 14:33:11	4.08	2.99	4.9	7.51	12.4	29.7	53.2	66.4	79.7	97.4	0.00299	0.0049	0.00751	0.0124	0.0297	0.0532	0.0664	0.0797	0.0974	8.38564	7.673	7.05697	6.33352	5.07339	4.23243	3.91267	3.64928	3.35993	-3.1443	-0.786075	-5.0257	-0.76147	1.54754		44.4	1.432	2.903	1.202	0.43	0.18	0.3	0.46	0.87	0.88	1.24	1.45	1.9
54	TAN2206_SW-80_4-5cm	2024-05-15 14:33:34	4.08	2.99	4.9	7.52	12.4	29.8	53.4	66.7	80.1	97.9	0.00299	0.0049	0.00752	0.0124	0.0298	0.0534	0.0667	0.0801	0.0979	8.38564	7.673	7.05505	6.33352	5.06854	4.22702	3.90617	3.64205	3.35255	-3.14888	-0.787221	-5.03309	-0.76259	1.54981		44.6	1.426	2.907	1.202	0.43	0.18	0.3	0.46	0.87	0.87	1.24	1.45	1.9
55	Average of 'TAN2206_SW-80_4-5cm'	2024-05-15 14:30:01	4.07	2.98	4.87	7.45	12.3	29.6	53.2	66.4	79.7	97.4	0.00298	0.00487	0.00745	0.0123	0.0296	0.0532	0.0664	0.0797	0.0974	8.39047	7.68186	7.06854	6.3452	5.07826	4.23243	3.91267	3.64928	3.35993	-3.15587	-0.788968	-5.03054	-0.762203	1.55117		44.5	1.309	2.908	1.181	0.43	0.18	0.3	0.46	0.88	0.88	1.25	1.47	1.92
56	TAN2206_SW-80_5-6cm	2024-05-15 14:42:12	3.95	2.94	4.84	7.49	12.6	30.7	54.5	67.7	80.9	98.4	0.00294	0.00484	0.00749	0.0126	0.0307	0.0545	0.0677	0.0809	0.0984	8.40997	7.69078	7.06082	6.31043	5.02562	4.1976	3.8847	3.62772	3.3452	-3.17612	-0.79403	-5.06477	-0.767389	1.56142		46.1	1.265	2.939	1.151	0.51	0.2	0.32	0.47	0.88	0.87	1.24	1.46	1.91
57	TAN2206_SW-80_5-6cm	2024-05-15 14:42:35	3.96	2.95	4.86	7.52	12.6	30.8	54.5	67.7	80.9	98.3	0.00295	0.00486	0.00752	0.0126	0.0308	0.0545	0.0677	0.0809	0.0983	8.40507	7.68483	7.05505	6.31043	5.02093	4.1976	3.8847	3.62772	3.34666	-3.17035	-0.792588	-5.0584	-0.766425	1.55901		46.2	1.259	2.934	1.148	0.5	0.2	0.32	0.47	0.87	0.87	1.23	1.45	1.9
58	TAN2206_SW-80_5-6cm	2024-05-15 14:42:59	3.98	2.96	4.87	7.54	12.6	30.8	54.6	67.7	80.7	97.7	0.00296	0.00487	0.00754	0.0126	0.0308	0.0546	0.0677	0.0807	0.0977	8.40019	7.68186	7.05122	6.31043	5.02093	4.19496	3.8847	3.63129	3.3555	-3.16652	-0.79163	-5.04469	-0.764347	1.55598		46.3	0.909	2.927	1.078	0.5	0.2	0.32	0.47	0.87	0.87	1.23	1.45	1.9
59	TAN2206_SW-80_5-6cm	2024-05-15 14:43:24	3.97	2.97	4.91	7.6	12.8	31	54.8	68	81.2	98.7	0.00297	0.00491	0.0076	0.0128	0.031	0.0548	0.068	0.0812	0.0987	8.39532	7.67006	7.03978	6.28771	5.01159	4.18968	3.87832	3.62238	3.34081	-3.16146	-0.790366	-5.05452	-0.765836	1.5562		46.2	1.26	2.929	1.148	0.49	0.2	0.31	0.47	0.86	0.86	1.21	1.43	1.88
60	TAN2206_SW-80_5-6cm	2024-05-15 14:43:49	3.98	2.97	4.91	7.6	12.8	30.9	54.6	67.7	80.9	98.3	0.00297	0.00491	0.0076	0.0128	0.0309	0.0546	0.0677	0.0809	0.0983	8.39532	7.67006	7.03978	6.28771	5.01625	4.19496	3.8847	3.62772	3.34666	-3.15508	-0.788771	-5.04866	-0.764948	1.55372		46	1.271	2.925	1.149	0.49	0.2	0.31	0.47	0.86	0.86	1.21	1.43	1.88
61	TAN2206_SW-80_5-6cm	2024-05-15 14:44:15	3.98	2.98	4.93	7.64	12.8	31	54.8	68	81.1	98.4	0.00298	0.00493	0.00764	0.0128	0.031	0.0548	0.068	0.0811	0.0984	8.39047	7.6642	7.03221	6.28771	5.01159	4.18968	3.87832	3.62415	3.3452	-3.15389	-0.788473	-5.04527	-0.764435	1.55291		46.3	1.22	2.923	1.137	0.48	0.2	0.31	0.47	0.86	0.86	1.21	1.43	1.87
62	TAN2206_SW-80_5-6cm	2024-05-15 14:44:39	3.99	2.98	4.93	7.64	12.8	31	54.7	67.8	80.9	98.1	0.00298	0.00493	0.00764	0.0128	0.031	0.0547	0.0678	0.0809	0.0981	8.39047	7.6642	7.03221	6.28771	5.01159	4.19232	3.88257	3.62772	3.3496	-3.14964	-0.78741	-5.04087	-0.763768	1.55118		46.3	1.216	2.922	1.135	0.49	0.2	0.31	0.47	0.86	0.86	1.21	1.42	1.86
63	TAN2206_SW-80_5-6cm	2024-05-15 14:45:03	4	2.98	4.94	7.67	12.9	31.1	54.9	68.2	81.3	98.8	0.00298	0.00494	0.00767	0.0129	0.0311	0.0549	0.0682	0.0813	0.0988	8.39047	7.66127	7.02656	6.27649	5.00694	4.18705	3.87408	3.6206	3.33935	-3.15247	-0.788118	-5.05113	-0.765322	1.55344		46.4	1.235	2.924	1.14	0.49	0.2	0.31	0.47	0.86	0.85	1.21	1.42	1.86
64	TAN2206_SW-80_5-6cm	2024-05-15 14:45:28	3.99	2.99	4.95	7.68	12.9	31.1	54.8	68	81.1	98.5	0.00299	0.00495	0.00768	0.0129	0.0311	0.0548	0.068	0.0811	0.0985	8.38564	7.65836	7.02468	6.27649	5.00694	4.18968	3.87832	3.62415	3.34373	-3.14636	-0.786589	-5.04191	-0.763925	1.55051		46.2	1.237	2.921	1.14	0.49	0.2	0.31	0.46	0.86	0.85	1.2	1.42	1.85
65	TAN2206_SW-80_5-6cm	2024-05-15 14:45:53	3.99	2.99	4.95	7.69	12.9	31.1	54.8	67.9	80.8	97.9	0.00299	0.00495	0.00769	0.0129	0.0311	0.0548	0.0679	0.0808	0.0979	8.38564	7.65836	7.0228	6.27649	5.00694	4.18968	3.88044	3.6295	3.35255	-3.14236	-0.785589	-5.03309	-0.76259	1.54818		46.3	0.902	2.915	1.073	0.49	0.2	0.31	0.47	0.86	0.85	1.2	1.41	1.85
66	Average of 'TAN2206_SW-80_5-6cm'	2024-05-15 14:42:12	3.98	2.97	4.91	7.61	12.8	31	54.7	67.9	81	98.3	0.00297	0.00491	0.00761	0.0128	0.031	0.0547	0.0679	0.081	0.0983	8.39532	7.67006	7.03789	6.28771	5.01159	4.19232	3.88044	3.62593	3.34666	-3.15744	-0.789361	-5.04866	-0.764948	1.55431		46.2	1.181	2.926	1.13	0.49	0.2	0.31	0.47	0.86	0.86	1.21	1.43	1.88
67	TAN2206_SW-80_6-7cm	2024-05-15 14:53:38	3.94	3.27	5.41	8.33	13.8	32.5	57.1	71.1	84.8	104	0.00327	0.00541	0.00833	0.0138	0.0325	0.0571	0.0711	0.0848	0.104	8.25649	7.53016	6.90747	6.17919	4.94342	4.13037	3.81401	3.55979	3.26534	-3.09346	-0.773365	-4.99115	-0.756235	1.5296		47.4	1.597	2.87	1.216	0.29	0.15	0.25	0.39	0.76	0.77	1.1	1.3	1.72
68	TAN2206_SW-80_6-7cm	2024-05-15 14:54:02	3.95	3.27	5.42	8.34	13.8	32.5	57.1	71.1	84.7	104	0.00327	0.00542	0.00834	0.0138	0.0325	0.0571	0.0711	0.0847	0.104	8.25649	7.52749	6.90574	6.17919	4.94342	4.13037	3.81401	3.56149	3.26534	-3.09173	-0.772933	-4.99115	-0.756235	1.52917		47.6	1.475	2.867	1.189	0.29	0.15	0.25	0.39	0.76	0.77	1.1	1.3	1.71
69	TAN2206_SW-80_6-7cm	2024-05-15 14:54:27	3.96	3.27	5.41	8.32	13.8	32.4	56.9	70.8	84.4	103	0.00327	0.00541	0.00832	0.0138	0.0324	0.0569	0.0708	0.0844	0.103	8.25649	7.53016	6.9092	6.17919	4.94786	4.13543	3.82011	3.56661	3.27928	-3.08909	-0.772273	-4.97721	-0.754123	1.5264		47.5	1.509	2.865	1.195	0.29	0.15	0.25	0.39	0.76	0.77	1.1	1.3	1.71
70	TAN2206_SW-80_6-7cm	2024-05-15 14:54:51	3.97	3.29	5.46	8.42	14	32.8	57.6	71.7	85.4	105	0.00329	0.00546	0.00842	0.014	0.0328	0.0576	0.0717	0.0854	0.105	8.2477	7.51688	6.89196	6.15843	4.93016	4.11779	3.80188	3.54962	3.25154	-3.09008	-0.77252	-4.99616	-0.756994	1.52951		47.8	1.519	2.869	1.2	0.29	0.15	0.25	0.39	0.76	0.77	1.09	1.28	1.69
71	TAN2206_SW-80_6-7cm	2024-05-15 14:55:14	3.97	3.29	5.46	8.42	14	32.7	57.2	71.1	84.7	104	0.00329	0.00546	0.00842	0.014	0.0327	0.0572	0.0711	0.0847	0.104	8.2477	7.51688	6.89196	6.15843	4.93457	4.12784	3.81401	3.56149	3.26534	-3.07796	-0.769489	-4.98235	-0.754902	1.52439		47.5	1.517	2.86	1.194	0.28	0.15	0.25	0.39	0.76	0.77	1.09	1.28	1.69
72	TAN2206_SW-80_6-7cm	2024-05-15 14:55:38	3.98	3.29	5.46	8.43	14	32.7	57.2	71.1	84.6	104	0.00329	0.00546	0.00843	0.014	0.0327	0.0572	0.0711	0.0846	0.104	8.2477	7.51688	6.89025	6.15843	4.93457	4.12784	3.81401	3.5632	3.26534	-3.07625	-0.769061	-4.98235	-0.754902	1.52396		47.5	1.5	2.859	1.19	0.29	0.15	0.25	0.39	0.76	0.77	1.09	1.28	1.69
73	TAN2206_SW-80_6-7cm	2024-05-15 14:56:02	3.98	3.3	5.49	8.48	14.1	32.8	57.4	71.4	85	104	0.0033	0.00549	0.00848	0.0141	0.0328	0.0574	0.0714	0.085	0.104	8.24332	7.50898	6.88172	6.14816	4.93016	4.12281	3.80793	3.55639	3.26534	-3.07379	-0.768447	-4.97797	-0.754238	1.52269		47.7	1.448	2.859	1.181	0.29	0.15	0.25	0.39	0.76	0.76	1.08	1.28	1.68
74	TAN2206_SW-80_6-7cm	2024-05-15 14:56:25	3.98	3.29	5.47	8.45	14	32.7	57.1	71	84.5	104	0.00329	0.00547	0.00845	0.014	0.0327	0.0571	0.071	0.0845	0.104	8.2477	7.51424	6.88683	6.15843	4.93457	4.13037	3.81604	3.5649	3.26534	-3.0708	-0.767699	-4.98235	-0.754902	1.5226		47.4	1.52	2.857	1.193	0.29	0.15	0.25	0.39	0.76	0.76	1.08	1.28	1.68
75	TAN2206_SW-80_6-7cm	2024-05-15 14:56:49	3.99	3.3	5.48	8.48	14.1	32.8	57.4	71.4	85.1	105	0.0033	0.00548	0.00848	0.0141	0.0328	0.0574	0.0714	0.0851	0.105	8.24332	7.51161	6.88172	6.14816	4.93016	4.12281	3.80793	3.5547	3.25154	-3.07379	-0.768447	-4.99178	-0.75633	1.52478		47.6	1.599	2.862	1.212	0.29	0.15	0.25	0.39	0.76	0.76	1.08	1.28	1.68
76	TAN2206_SW-80_6-7cm	2024-05-15 14:57:12	3.99	3.29	5.48	8.47	14	32.8	57.3	71.1	84.7	104	0.00329	0.00548	0.00847	0.014	0.0328	0.0573	0.0711	0.0847	0.104	8.2477	7.51161	6.88342	6.15843	4.93016	4.12532	3.81401	3.56149	3.26534	-3.06942	-0.767354	-4.98235	-0.754902	1.52226		47.6	1.502	2.858	1.189	0.29	0.15	0.25	0.39	0.76	0.77	1.08	1.28	1.68
77	Average of 'TAN2206_SW-80_6-7cm'	2024-05-15 14:53:38	3.97	3.29	5.45	8.41	13.9	32.7	57.3	71.2	84.8	104	0.00329	0.00545	0.00841	0.0139	0.0327	0.0573	0.0712	0.0848	0.104	8.2477	7.51953	6.89368	6.16877	4.93457	4.12532	3.81198	3.55979	3.26534	-3.0817	-0.770425	-4.98235	-0.754902	1.52533		47.6	1.52	2.863	1.196	0.29	0.15	0.25	0.39	0.76	0.77	1.09	1.28	1.69
78	TAN2206_SW-80_7-8cm	2024-05-15 15:20:26	4.27	3.18	5.34	8.4	14.4	33.9	58.9	73.1	86.9	106	0.00318	0.00534	0.0084	0.0144	0.0339	0.0589	0.0731	0.0869	0.106	8.29676	7.54894	6.89539	6.11779	4.88257	4.08559	3.77398	3.5245	3.23786	-3.12141	-0.780353	-5.05889	-0.766499	1.54685		48.8	1.383	2.918	1.159	0.42	0.17	0.27	0.41	0.78	0.78	1.11	1.31	1.71
79	TAN2206_SW-80_7-8cm	2024-05-15 15:20:51	4.27	3.18	5.34	8.38	14.3	33.8	58.6	72.5	85.9	105	0.00318	0.00534	0.00838	0.0143	0.0338	0.0586	0.0725	0.0859	0.105	8.29676	7.54894	6.89883	6.12784	4.88683	4.09296	3.78588	3.5412	3.25154	-3.11296	-0.77824	-5.04522	-0.764427	1.54267		49	1.046	2.905	1.086	0.41	0.17	0.27	0.41	0.78	0.78	1.11	1.31	1.71
80	TAN2206_SW-80_7-8cm	2024-05-15 15:21:15	4.27	3.2	5.36	8.43	14.4	34	59	73.1	86.9	106	0.0032	0.00536	0.00843	0.0144	0.034	0.059	0.0731	0.0869	0.106	8.28771	7.54355	6.89025	6.11779	4.87832	4.08314	3.77398	3.5245	3.23786	-3.11627	-0.779067	-5.04985	-0.765129	1.5442		48.9	1.322	2.912	1.145	0.4	0.17	0.27	0.41	0.78	0.78	1.1	1.3	1.7
81	TAN2206_SW-80_7-8cm	2024-05-15 15:21:38	4.29	3.21	5.39	8.48	14.5	34	59	73.1	86.8	106	0.00321	0.00539	0.00848	0.0145	0.034	0.059	0.0731	0.0868	0.106	8.28321	7.5355	6.88172	6.1078	4.87832	4.08314	3.77398	3.52616	3.23786	-3.10774	-0.776934	-5.04535	-0.764447	1.54138		49	1.332	2.908	1.144	0.4	0.17	0.27	0.41	0.77	0.77	1.1	1.29	1.69
82	TAN2206_SW-80_7-8cm	2024-05-15 15:22:02	4.29	3.21	5.4	8.5	14.5	34.1	59	73.2	87	106	0.00321	0.0054	0.0085	0.0145	0.0341	0.059	0.0732	0.087	0.106	8.28321	7.53282	6.87832	6.1078	4.87408	4.08314	3.77201	3.52284	3.23786	-3.10631	-0.776577	-5.04535	-0.764447	1.54102		48.8	1.386	2.907	1.157	0.4	0.17	0.27	0.41	0.77	0.77	1.09	1.29	1.69
83	TAN2206_SW-80_7-8cm	2024-05-15 15:22:25	4.29	3.22	5.42	8.53	14.6	34.1	59	72.9	86.3	105	0.00322	0.00542	0.00853	0.0146	0.0341	0.059	0.0729	0.0863	0.105	8.27872	7.52749	6.87324	6.09789	4.87408	4.08314	3.77794	3.5345	3.25154	-3.0953	-0.773825	-5.02718	-0.761695	1.53552		49.1	1.028	2.897	1.081	0.4	0.17	0.27	0.41	0.77	0.77	1.09	1.28	1.68
84	TAN2206_SW-80_7-8cm	2024-05-15 15:22:49	4.3	3.21	5.41	8.52	14.5	34	58.9	73	86.6	106	0.00321	0.00541	0.00852	0.0145	0.034	0.0589	0.073	0.0866	0.106	8.28321	7.53016	6.87493	6.1078	4.87832	4.08559	3.77596	3.52949	3.23786	-3.09897	-0.774743	-5.04535	-0.764447	1.53919		48.8	1.302	2.902	1.138	0.4	0.17	0.27	0.41	0.77	0.77	1.09	1.28	1.68
85	TAN2206_SW-80_7-8cm	2024-05-15 15:23:13	4.29	3.22	5.42	8.55	14.6	34.1	58.9	72.8	86.2	105	0.00322	0.00542	0.00855	0.0146	0.0341	0.0589	0.0728	0.0862	0.105	8.27872	7.52749	6.86986	6.09789	4.87408	4.08559	3.77992	3.53617	3.25154	-3.08994	-0.772486	-5.02718	-0.761695	1.53418		49	1.046	2.895	1.085	0.4	0.17	0.27	0.41	0.77	0.77	1.09	1.28	1.68
86	TAN2206_SW-80_7-8cm	2024-05-15 15:23:36	4.3	3.22	5.44	8.58	14.6	34.2	59	72.9	86.3	105	0.00322	0.00544	0.00858	0.0146	0.0342	0.059	0.0729	0.0863	0.105	8.27872	7.52218	6.86481	6.09789	4.86986	4.08314	3.77794	3.5345	3.25154	-3.08687	-0.771717	-5.02718	-0.761695	1.53341		49.2	1.022	2.894	1.078	0.4	0.17	0.27	0.41	0.77	0.77	1.08	1.27	1.67
87	TAN2206_SW-80_7-8cm	2024-05-15 15:24:02	4.29	3.23	5.45	8.59	14.6	34.2	59	72.9	86.2	105	0.00323	0.00545	0.00859	0.0146	0.0342	0.059	0.0729	0.0862	0.105	8.27425	7.51953	6.86313	6.09789	4.86986	4.08314	3.77794	3.53617	3.25154	-3.08519	-0.771297	-5.02271	-0.761017	1.53231		49.1	1	2.891	1.071	0.4	0.17	0.27	0.41	0.77	0.77	1.08	1.27	1.67
88	Average of 'TAN2206_SW-80_7-8cm'	2024-05-15 15:20:26	4.29	3.21	5.4	8.5	14.5	34	58.9	73	86.5	106	0.00321	0.0054	0.0085	0.0145	0.034	0.0589	0.073	0.0865	0.106	8.28321	7.53282	6.87832	6.1078	4.87832	4.08559	3.77596	3.53116	3.23786	-3.10236	-0.77559	-5.04535	-0.764447	1.54004		49	1.195	2.903	1.116	0.4	0.17	0.27	0.41	0.77	0.77	1.09	1.29	1.69
89	TAN2206_SW-80_8-9cm	2024-05-15 15:34:49	4.18	3.23	5.42	8.53	14.6	34.2	59.6	74.1	88.3	108	0.00323	0.00542	0.00853	0.0146	0.0342	0.0596	0.0741	0.0883	0.108	8.27425	7.52749	6.87324	6.09789	4.86986	4.06854	3.75438	3.50144	3.2109	-3.11886	-0.779714	-5.06335	-0.767175	1.54689		49.1	1.411	2.908	1.171	0.33	0.16	0.26	0.41	0.77	0.78	1.1	1.3	1.7
90	TAN2206_SW-80_8-9cm	2024-05-15 15:35:14	4.18	3.24	5.42	8.51	14.5	34	59.3	73.7	88	108	0.00324	0.00542	0.00851	0.0145	0.034	0.0593	0.0737	0.088	0.108	8.26979	7.52749	6.87663	6.1078	4.87832	4.07582	3.76219	3.50635	3.2109	-3.11443	-0.778608	-5.05889	-0.766499	1.54511		48.8	1.43	2.904	1.176	0.32	0.16	0.26	0.41	0.77	0.78	1.1	1.3	1.7
91	TAN2206_SW-80_8-9cm	2024-05-15 15:35:39	4.2	3.26	5.48	8.63	14.7	34.5	59.9	74.4	88.7	108	0.00326	0.00548	0.00863	0.0147	0.0345	0.0599	0.0744	0.0887	0.108	8.26091	7.51161	6.85642	6.08804	4.85726	4.0613	3.74855	3.49492	3.2109	-3.10787	-0.776968	-5.05002	-0.765154	1.54212		49.3	1.44	2.902	1.175	0.31	0.16	0.26	0.4	0.76	0.77	1.09	1.28	1.68
92	TAN2206_SW-80_8-9cm	2024-05-15 15:36:03	4.21	3.27	5.49	8.65	14.8	34.4	59.6	73.9	88	108	0.00327	0.00549	0.00865	0.0148	0.0344	0.0596	0.0739	0.088	0.108	8.25649	7.50898	6.85308	6.07826	4.86145	4.06854	3.75828	3.50635	3.2109	-3.0948	-0.773701	-5.0456	-0.764484	1.53818		49	1.447	2.894	1.173	0.31	0.16	0.26	0.4	0.76	0.77	1.09	1.28	1.67
93	TAN2206_SW-80_8-9cm	2024-05-15 15:36:27	4.21	3.28	5.52	8.72	14.9	34.6	59.9	74.2	88.5	108	0.00328	0.00552	0.00872	0.0149	0.0346	0.0599	0.0742	0.0885	0.108	8.25209	7.50112	6.84146	6.06854	4.85308	4.0613	3.75244	3.49818	3.2109	-3.08902	-0.772255	-5.04119	-0.763817	1.53607		49.1	1.533	2.894	1.192	0.31	0.16	0.26	0.4	0.76	0.76	1.08	1.27	1.66
94	TAN2206_SW-80_8-9cm	2024-05-15 15:36:50	4.22	3.29	5.54	8.74	14.9	34.7	60	74.3	88.5	108	0.00329	0.00554	0.00874	0.0149	0.0347	0.06	0.0743	0.0885	0.108	8.2477	7.4959	6.83815	6.06854	4.84892	4.05889	3.75049	3.49818	3.2109	-3.08766	-0.771914	-5.0368	-0.763152	1.53507		49.5	1.331	2.891	1.146	0.31	0.16	0.26	0.4	0.76	0.76	1.08	1.26	1.65
95	TAN2206_SW-80_8-9cm	2024-05-15 15:37:15	4.21	3.29	5.55	8.76	14.9	34.7	60.2	74.6	89	109	0.00329	0.00555	0.00876	0.0149	0.0347	0.0602	0.0746	0.089	0.109	8.2477	7.4933	6.83485	6.06854	4.84892	4.05409	3.74468	3.49005	3.1976	-3.09017	-0.772543	-5.0501	-0.765166	1.53771		49.4	1.412	2.895	1.168	0.31	0.16	0.26	0.4	0.76	0.76	1.07	1.26	1.65
96	TAN2206_SW-80_8-9cm	2024-05-15 15:37:38	4.22	3.3	5.57	8.79	15	34.8	60.1	74.5	88.7	108	0.0033	0.00557	0.00879	0.015	0.0348	0.0601	0.0745	0.0887	0.108	8.24332	7.48811	6.82992	6.05889	4.84477	4.05649	3.74662	3.49492	3.2109	-3.08331	-0.770826	-5.03242	-0.762488	1.53331		49.5	1.334	2.888	1.147	0.31	0.16	0.26	0.4	0.75	0.76	1.07	1.25	1.64
97	TAN2206_SW-80_8-9cm	2024-05-15 15:38:02	4.22	3.29	5.55	8.77	14.9	34.7	60	74.4	88.5	108	0.00329	0.00555	0.00877	0.0149	0.0347	0.06	0.0744	0.0885	0.108	8.2477	7.4933	6.83321	6.06854	4.84892	4.05889	3.74855	3.49818	3.2109	-3.08465	-0.771163	-5.0368	-0.763152	1.53431		49.4	1.073	2.887	1.102	0.31	0.16	0.26	0.4	0.76	0.76	1.07	1.26	1.65
98	TAN2206_SW-80_8-9cm	2024-05-15 15:38:25	4.23	3.29	5.56	8.79	14.9	34.7	60	74.3	88.4	108	0.00329	0.00556	0.00879	0.0149	0.0347	0.06	0.0743	0.0884	0.108	8.2477	7.4907	6.82992	6.06854	4.84892	4.05889	3.75049	3.49981	3.2109	-3.07943	-0.769857	-5.0368	-0.763152	1.53301		49.5	1.263	2.886	1.131	0.31	0.16	0.26	0.4	0.76	0.76	1.07	1.26	1.64
99	Average of 'TAN2206_SW-80_8-9cm'	2024-05-15 15:34:49	4.21	3.27	5.51	8.69	14.8	34.5	59.9	74.2	88.5	108	0.00327	0.00551	0.00869	0.0148	0.0345	0.0599	0.0742	0.0885	0.108	8.25649	7.50373	6.84643	6.07826	4.85726	4.0613	3.75244	3.49818	3.2109	-3.09399	-0.773498	-5.0456	-0.764484	1.53798		49.3	1.37	2.895	1.158	0.31	0.16	0.26	0.4	0.76	0.77	1.08	1.27	1.66
100	TAN2206_SW-80_9-10cm	2024-05-15 15:45:44	4.23	3.2	5.28	8.17	13.7	32.7	57.7	72	86	106	0.0032	0.00528	0.00817	0.0137	0.0327	0.0577	0.072	0.086	0.106	8.28771	7.56525	6.93545	6.18968	4.93457	4.11528	3.79586	3.53952	3.23786	-3.13959	-0.784897	-5.04985	-0.765129	1.55003		47.6	1.653	2.905	1.235	0.3	0.16	0.26	0.41	0.79	0.8	1.14	1.35	1.77
101	TAN2206_SW-80_9-10cm	2024-05-15 15:46:07	4.24	3.21	5.31	8.22	13.8	32.9	58.2	72.8	87.1	108	0.00321	0.00531	0.00822	0.0138	0.0329	0.0582	0.0728	0.0871	0.108	8.28321	7.55707	6.92665	6.17919	4.92577	4.10284	3.77992	3.52118	3.2109	-3.14673	-0.786682	-5.07231	-0.768532	1.55521		47.8	1.742	2.912	1.258	0.3	0.15	0.26	0.41	0.79	0.8	1.13	1.34	1.76
102	TAN2206_SW-80_9-10cm	2024-05-15 15:46:31	4.26	3.21	5.31	8.21	13.8	32.8	57.8	71.9	85.5	104	0.00321	0.00531	0.00821	0.0138	0.0328	0.0578	0.0719	0.0855	0.104	8.28321	7.55707	6.9284	6.17919	4.93016	4.11279	3.79786	3.54793	3.26534	-3.13054	-0.782634	-5.01787	-0.760283	1.54292		48.4	1.072	2.891	1.11	0.3	0.15	0.26	0.41	0.79	0.8	1.14	1.34	1.76
103	TAN2206_SW-80_9-10cm	2024-05-15 15:46:55	4.27	3.22	5.33	8.25	13.8	32.9	58	72.2	85.8	105	0.00322	0.00533	0.00825	0.0138	0.0329	0.058	0.0722	0.0858	0.105	8.27872	7.55165	6.92139	6.17919	4.92577	4.1078	3.79186	3.54288	3.25154	-3.12953	-0.782383	-5.02718	-0.761695	1.54408		48.3	0.856	2.888	1.068	0.29	0.15	0.26	0.4	0.79	0.8	1.13	1.33	1.75
104	TAN2206_SW-80_9-10cm	2024-05-15 15:47:18	4.28	3.23	5.35	8.3	13.9	33.1	58.3	72.7	86.7	107	0.00323	0.00535	0.0083	0.0139	0.0331	0.0583	0.0727	0.0867	0.107	8.27425	7.54625	6.91267	6.16877	4.91702	4.10036	3.7819	3.52782	3.22432	-3.13077	-0.782693	-5.04993	-0.765141	1.54783		48.2	1.207	2.898	1.15	0.29	0.15	0.26	0.4	0.78	0.79	1.12	1.32	1.74
105	TAN2206_SW-80_9-10cm	2024-05-15 15:47:44	4.29	3.23	5.35	8.31	13.9	33	58.1	72.3	86.1	106	0.00323	0.00535	0.00831	0.0139	0.033	0.0581	0.0723	0.0861	0.106	8.27425	7.54625	6.91094	6.16877	4.92139	4.10532	3.78986	3.53784	3.23786	-3.12108	-0.780269	-5.03639	-0.763089	1.54336		48.1	1.381	2.892	1.173	0.29	0.15	0.26	0.4	0.78	0.79	1.12	1.32	1.73
106	TAN2206_SW-80_9-10cm	2024-05-15 15:48:07	4.29	3.24	5.37	8.33	14	33.1	58.2	72.5	86.4	106	0.00324	0.00537	0.00833	0.014	0.0331	0.0582	0.0725	0.0864	0.106	8.26979	7.54086	6.90747	6.15843	4.91702	4.10284	3.78588	3.53282	3.23786	-3.12159	-0.780398	-5.03193	-0.762413	1.54281		48.2	1.47	2.894	1.191	0.29	0.15	0.26	0.4	0.78	0.79	1.12	1.32	1.73
107	TAN2206_SW-80_9-10cm	2024-05-15 15:48:31	4.3	3.25	5.4	8.39	14.1	33.3	58.5	72.8	86.8	107	0.00325	0.0054	0.00839	0.0141	0.0333	0.0585	0.0728	0.0868	0.107	8.26534	7.53282	6.89711	6.14816	4.90833	4.09542	3.77992	3.52616	3.22432	-3.1172	-0.779299	-5.04103	-0.763792	1.54309		48.3	1.535	2.895	1.204	0.29	0.15	0.26	0.4	0.78	0.79	1.11	1.31	1.72
108	TAN2206_SW-80_9-10cm	2024-05-15 15:48:54	4.29	3.24	5.38	8.37	14.1	33.2	58.3	72.5	86.1	105	0.00324	0.00538	0.00837	0.0141	0.0332	0.0583	0.0725	0.0861	0.105	8.26979	7.53818	6.90056	6.14816	4.91267	4.10036	3.78588	3.53784	3.25154	-3.11468	-0.77867	-5.01825	-0.760341	1.53901		48.5	1.086	2.886	1.113	0.29	0.15	0.26	0.4	0.78	0.79	1.12	1.31	1.72
109	TAN2206_SW-80_9-10cm	2024-05-15 15:49:20	4.29	3.24	5.38	8.37	14	33.2	58.2	72.3	85.8	104	0.00324	0.00538	0.00837	0.014	0.0332	0.0582	0.0723	0.0858	0.104	8.26979	7.53818	6.90056	6.15843	4.91267	4.10284	3.78986	3.54288	3.26534	-3.1107	-0.777674	-5.00445	-0.758249	1.53592		48.7	0.815	2.88	1.053	0.29	0.16	0.26	0.4	0.78	0.79	1.12	1.31	1.72
110	Average of 'TAN2206_SW-80_9-10cm'	2024-05-15 15:45:44	4.27	3.23	5.35	8.29	13.9	33	58.1	72.4	86.2	106	0.00323	0.00535	0.00829	0.0139	0.033	0.0581	0.0724	0.0862	0.106	8.27425	7.54625	6.91441	6.16877	4.92139	4.10532	3.78787	3.53617	3.23786	-3.12655	-0.781636	-5.03639	-0.763089	1.54473		48.2	1.306	2.894	1.159	0.29	0.15	0.26	0.4	0.78	0.79	1.13	1.32	1.74
111	TAN2206_SW-80_10-11cm	2024-05-15 15:56:55	4.2	3.26	5.56	8.92	15.5	36.2	62.4	77.2	92	112	0.00326	0.00556	0.00892	0.0155	0.0362	0.0624	0.0772	0.092	0.112	8.26091	7.4907	6.80874	6.01159	4.78787	4.00231	3.69526	3.44222	3.15843	-3.11349	-0.778371	-5.10248	-0.773103	1.55147		51.3	1.295	2.934	1.136	0.41	0.17	0.27	0.4	0.75	0.75	1.06	1.25	1.63
112	TAN2206_SW-80_10-11cm	2024-05-15 15:57:21	4.21	3.28	5.6	8.97	15.6	36.4	62.8	77.7	92.6	113	0.00328	0.0056	0.00897	0.0156	0.0364	0.0628	0.0777	0.0926	0.113	8.25209	7.48036	6.80068	6.00231	4.77992	3.99309	3.68594	3.43284	3.14561	-3.11473	-0.778684	-5.10648	-0.77371	1.55239		51.8	1.317	2.936	1.142	0.4	0.17	0.26	0.4	0.74	0.74	1.05	1.24	1.62
113	TAN2206_SW-80_10-11cm	2024-05-15 15:57:45	4.21	3.29	5.61	8.98	15.6	36.3	62.7	77.5	92.4	112	0.00329	0.00561	0.00898	0.0156	0.0363	0.0627	0.0775	0.0924	0.112	8.2477	7.47778	6.79907	6.00231	4.78389	3.99539	3.68966	3.43596	3.15843	-3.10941	-0.777352	-5.08927	-0.771101	1.54845		51.5	1.311	2.931	1.14	0.4	0.17	0.26	0.4	0.74	0.74	1.05	1.23	1.61
114	TAN2206_SW-80_10-11cm	2024-05-15 15:58:09	4.22	3.31	5.66	9.07	15.7	36.6	63	77.8	92.7	113	0.00331	0.00566	0.00907	0.0157	0.0366	0.063	0.0778	0.0927	0.113	8.23895	7.46498	6.78468	5.99309	4.77201	3.9885	3.68409	3.43129	3.14561	-3.1006	-0.775149	-5.09335	-0.771719	1.54687		51.9	1.3	2.927	1.135	0.39	0.16	0.26	0.39	0.73	0.73	1.04	1.22	1.59
115	TAN2206_SW-80_10-11cm	2024-05-15 15:58:32	4.23	3.31	5.66	9.07	15.7	36.5	62.7	77.5	92.3	112	0.00331	0.00566	0.00907	0.0157	0.0365	0.0627	0.0775	0.0923	0.112	8.23895	7.46498	6.78468	5.99309	4.77596	3.99539	3.68966	3.43753	3.15843	-3.09502	-0.773755	-5.08052	-0.769776	1.54353		51.8	1.289	2.923	1.131	0.39	0.16	0.26	0.39	0.74	0.73	1.04	1.22	1.6
116	TAN2206_SW-80_10-11cm	2024-05-15 15:58:56	4.23	3.32	5.69	9.12	15.8	36.6	62.9	77.7	92.5	112	0.00332	0.00569	0.00912	0.0158	0.0366	0.0629	0.0777	0.0925	0.112	8.2346	7.45736	6.77675	5.98393	4.77201	3.9908	3.68594	3.4344	3.15843	-3.09081	-0.772702	-5.07617	-0.769117	1.54182		51.9	1.243	2.92	1.12	0.39	0.16	0.26	0.39	0.73	0.73	1.03	1.21	1.58
117	TAN2206_SW-80_10-11cm	2024-05-15 15:59:19	4.24	3.36	5.75	9.22	15.9	36.8	63.2	78.1	92.9	113	0.00336	0.00575	0.00922	0.0159	0.0368	0.0632	0.0781	0.0929	0.113	8.21732	7.44222	6.76102	5.97483	4.76415	3.98393	3.67853	3.42818	3.14561	-3.08248	-0.770621	-5.07172	-0.768442	1.53906		52	1.261	2.908	1.125	0.33	0.16	0.26	0.39	0.73	0.73	1.03	1.21	1.58
118	TAN2206_SW-80_10-11cm	2024-05-15 15:59:45	4.25	3.32	5.7	9.14	15.8	36.6	62.8	77.5	92	111	0.00332	0.0057	0.00914	0.0158	0.0366	0.0628	0.0775	0.092	0.111	8.2346	7.45482	6.77359	5.98393	4.77201	3.99309	3.68966	3.44222	3.17137	-3.08393	-0.770983	-5.06323	-0.767156	1.53814		52	0.873	2.912	1.043	0.39	0.16	0.26	0.39	0.73	0.73	1.03	1.21	1.58
119	TAN2206_SW-80_10-11cm	2024-05-15 16:00:08	4.24	3.34	5.73	9.17	15.8	36.6	62.8	77.6	92.3	112	0.00334	0.00573	0.00917	0.0158	0.0366	0.0628	0.0776	0.0923	0.112	8.22594	7.44725	6.76886	5.98393	4.77201	3.99309	3.6878	3.43753	3.15843	-3.08106	-0.770266	-5.06751	-0.767804	1.53807		51.8	1.222	2.905	1.115	0.33	0.16	0.26	0.39	0.73	0.73	1.03	1.21	1.58
120	TAN2206_SW-80_10-11cm	2024-05-15 16:00:32	4.24	3.33	5.72	9.17	15.9	36.6	62.8	77.6	92.4	112	0.00333	0.00572	0.00917	0.0159	0.0366	0.0628	0.0776	0.0924	0.112	8.23026	7.44977	6.76886	5.97483	4.77201	3.99309	3.6878	3.43596	3.15843	-3.08106	-0.770266	-5.07183	-0.76846	1.53873		51.7	1.295	2.916	1.131	0.39	0.16	0.26	0.39	0.73	0.73	1.03	1.2	1.57
121	Average of 'TAN2206_SW-80_10-11cm'	2024-05-15 15:56:55	4.23	3.31	5.67	9.08	15.7	36.5	62.8	77.6	92.4	112	0.00331	0.00567	0.00908	0.0157	0.0365	0.0628	0.0776	0.0924	0.112	8.23895	7.46244	6.78309	5.99309	4.77596	3.99309	3.6878	3.43596	3.15843	-3.09529	-0.773823	-5.08052	-0.769776	1.5436		51.8	1.244	2.921	1.122	0.38	0.17	0.26	0.39	0.74	0.73	1.04	1.22	1.59
122	TAN2206_SW-80_11-12cm	2024-05-15 16:07:53	4.26	3.44	5.86	9.35	16.1	37.2	64	79	93.7	113	0.00344	0.00586	0.00935	0.0161	0.0372	0.064	0.079	0.0937	0.113	8.18338	7.41488	6.74082	5.9568	4.74855	3.96578	3.662	3.41581	3.14561	-3.07881	-0.769704	-5.03777	-0.763299	1.533		53.1	0.98	2.893	1.058	0.28	0.14	0.24	0.37	0.71	0.72	1.01	1.19	1.56
123	TAN2206_SW-80_11-12cm	2024-05-15 16:08:17	4.28	3.45	5.87	9.38	16.2	37.3	64.5	80	95.4	117	0.00345	0.00587	0.00938	0.0162	0.0373	0.0645	0.08	0.0954	0.117	8.17919	7.41242	6.7362	5.94786	4.74468	3.95456	3.64386	3.38987	3.09542	-3.09234	-0.773085	-5.08377	-0.770268	1.54335		52.4	1.281	2.908	1.145	0.27	0.14	0.23	0.37	0.71	0.71	1.01	1.19	1.55
124	TAN2206_SW-80_11-12cm	2024-05-15 16:08:40	4.29	3.46	5.9	9.41	16.2	37.4	64.3	79.5	94.5	115	0.00346	0.0059	0.00941	0.0162	0.0374	0.0643	0.0795	0.0945	0.115	8.17501	7.40507	6.73159	5.94786	4.74082	3.95904	3.6529	3.40354	3.12029	-3.07869	-0.769672	-5.05472	-0.765866	1.53554		52.9	1.167	2.896	1.107	0.27	0.14	0.23	0.36	0.7	0.71	1	1.18	1.54
125	TAN2206_SW-80_11-12cm	2024-05-15 16:09:06	4.31	3.46	5.9	9.41	16.2	37.3	64.1	79.3	94.3	115	0.00346	0.0059	0.00941	0.0162	0.0373	0.0641	0.0793	0.0943	0.115	8.17501	7.40507	6.73159	5.94786	4.74468	3.96353	3.65654	3.4066	3.12029	-3.07505	-0.768764	-5.05472	-0.765866	1.53463		52.6	1.188	2.894	1.112	0.27	0.14	0.23	0.36	0.7	0.71	1	1.18	1.54
126	TAN2206_SW-80_11-12cm	2024-05-15 16:09:29	4.31	3.48	5.96	9.53	16.4	37.5	64.5	79.9	95.1	116	0.00348	0.00596	0.00953	0.0164	0.0375	0.0645	0.0799	0.0951	0.116	8.1667	7.39047	6.71331	5.93016	4.73697	3.95456	3.64566	3.39441	3.1078	-3.06765	-0.766912	-5.05889	-0.766499	1.53341		52.6	1.261	2.894	1.133	0.27	0.14	0.23	0.36	0.7	0.7	0.99	1.17	1.53
127	TAN2206_SW-80_11-12cm	2024-05-15 16:09:53	4.32	3.48	5.96	9.52	16.4	37.5	64.4	79.6	94.7	115	0.00348	0.00596	0.00952	0.0164	0.0375	0.0644	0.0796	0.0947	0.115	8.1667	7.39047	6.71482	5.93016	4.73697	3.9568	3.65109	3.40049	3.12029	-3.06373	-0.765934	-5.0464	-0.764606	1.53054		52.7	1.207	2.89	1.116	0.27	0.14	0.23	0.36	0.7	0.7	0.99	1.17	1.52
128	TAN2206_SW-80_11-12cm	2024-05-15 16:10:16	4.36	3.49	5.97	9.55	16.4	37.6	64.7	80.1	95.2	116	0.00349	0.00597	0.00955	0.0164	0.0376	0.0647	0.0801	0.0952	0.116	8.16256	7.38805	6.71028	5.93016	4.73312	3.95009	3.64205	3.39289	3.1078	-3.06823	-0.767057	-5.05475	-0.765872	1.53293		53.1	1.169	2.894	1.109	0.27	0.14	0.23	0.36	0.7	0.7	0.99	1.16	1.52
129	TAN2206_SW-80_11-12cm	2024-05-15 16:10:42	4.32	3.48	5.97	9.54	16.4	37.6	64.4	79.6	94.6	115	0.00348	0.00597	0.00954	0.0164	0.0376	0.0644	0.0796	0.0946	0.115	8.1667	7.38805	6.7118	5.93016	4.73312	3.9568	3.65109	3.40202	3.12029	-3.06071	-0.765177	-5.0464	-0.764606	1.52978		52.8	1.197	2.889	1.112	0.27	0.14	0.23	0.36	0.7	0.7	0.99	1.16	1.52
130	TAN2206_SW-80_11-12cm	2024-05-15 16:11:05	4.34	3.49	5.97	9.55	16.4	37.6	64.4	79.5	94.5	115	0.00349	0.00597	0.00955	0.0164	0.0376	0.0644	0.0795	0.0945	0.115	8.16256	7.38805	6.71028	5.93016	4.73312	3.9568	3.6529	3.40354	3.12029	-3.05738	-0.764346	-5.04226	-0.763979	1.52832		52.9	1.181	2.886	1.107	0.27	0.14	0.23	0.36	0.7	0.7	0.99	1.16	1.52
131	TAN2206_SW-80_11-12cm	2024-05-15 16:11:29	4.33	3.48	5.97	9.55	16.4	37.5	64.5	79.7	94.6	115	0.00348	0.00597	0.00955	0.0164	0.0375	0.0645	0.0797	0.0946	0.115	8.1667	7.38805	6.71028	5.93016	4.73697	3.95456	3.64928	3.40202	3.12029	-3.06101	-0.765252	-5.0464	-0.764606	1.52986		53	0.79	2.884	1.029	0.27	0.14	0.23	0.36	0.7	0.7	0.99	1.16	1.52
132	Average of 'TAN2206_SW-80_11-12cm'	2024-05-15 16:07:53	4.31	3.47	5.93	9.48	16.3	37.4	64.4	79.6	94.6	115	0.00347	0.00593	0.00948	0.0163	0.0374	0.0644	0.0796	0.0946	0.115	8.17085	7.39775	6.7209	5.93898	4.74082	3.9568	3.65109	3.40202	3.12029	-3.06981	-0.767452	-5.05055	-0.765236	1.53269		52.8	1.149	2.893	1.104	0.27	0.14	0.23	0.36	0.7	0.71	1	1.17	1.53
133	TAN2206_SW-80_12-13cm	2024-05-15 16:34:24	4.44	3.52	5.94	9.43	16.4	37.7	64.7	80.2	95.5	117	0.00352	0.00594	0.00943	0.0164	0.0377	0.0647	0.0802	0.0955	0.117	8.15021	7.39532	6.72853	5.93016	4.72929	3.95009	3.64025	3.38836	3.09542	-3.08827	-0.772068	-5.05479	-0.765877	1.53795		52.7	1.661	2.9	1.206	0.26	0.14	0.22	0.35	0.68	0.69	0.99	1.17	1.54
134	TAN2206_SW-80_12-13cm	2024-05-15 16:34:49	4.45	3.5	5.9	9.35	16.2	37.7	65	80.6	95.9	118	0.0035	0.0059	0.00935	0.0162	0.0377	0.065	0.0806	0.0959	0.118	8.15843	7.40507	6.74082	5.94786	4.72929	3.94342	3.63308	3.38233	3.08314	-3.10774	-0.776935	-5.07529	-0.768983	1.54592		53.3	1.579	2.911	1.193	0.26	0.14	0.22	0.35	0.69	0.7	1	1.18	1.56
135	TAN2206_SW-80_12-13cm	2024-05-15 16:35:15	4.46	3.51	5.92	9.38	16.2	37.8	65.1	80.6	96	118	0.00351	0.00592	0.00938	0.0162	0.0378	0.0651	0.0806	0.096	0.118	8.15431	7.40019	6.7362	5.94786	4.72547	3.9412	3.63308	3.38082	3.08314	-3.10312	-0.77578	-5.07117	-0.768359	1.54414		53.3	1.578	2.909	1.19	0.26	0.13	0.22	0.35	0.68	0.7	0.99	1.17	1.55
136	TAN2206_SW-80_12-13cm	2024-05-15 16:35:38	4.46	3.52	5.96	9.45	16.4	37.9	65.1	80.6	95.9	118	0.00352	0.00596	0.00945	0.0164	0.0379	0.0651	0.0806	0.0959	0.118	8.15021	7.39047	6.72547	5.93016	4.72166	3.9412	3.63308	3.38233	3.08314	-3.09239	-0.773098	-5.06707	-0.767738	1.54084		53.2	1.649	2.904	1.203	0.25	0.13	0.22	0.35	0.68	0.69	0.98	1.17	1.54
137	TAN2206_SW-80_12-13cm	2024-05-15 16:36:02	4.48	3.51	5.93	9.41	16.3	37.7	64.6	79.7	94.4	114	0.00351	0.00593	0.00941	0.0163	0.0377	0.0646	0.0797	0.0944	0.114	8.15431	7.39775	6.73159	5.93898	4.72929	3.95232	3.64928	3.40507	3.13289	-3.08231	-0.770578	-5.02142	-0.760821	1.5314		53.6	0.754	2.886	1.013	0.26	0.14	0.22	0.35	0.69	0.7	0.99	1.17	1.54
138	TAN2206_SW-80_12-13cm	2024-05-15 16:36:25	4.48	3.52	5.95	9.45	16.4	37.8	64.6	79.6	94.3	114	0.00352	0.00595	0.00945	0.0164	0.0378	0.0646	0.0796	0.0943	0.114	8.15021	7.39289	6.72547	5.93016	4.72547	3.95232	3.65109	3.4066	3.13289	-3.07438	-0.768596	-5.01731	-0.760199	1.52879		53.4	0.768	2.881	1.016	0.25	0.14	0.22	0.35	0.68	0.69	0.99	1.17	1.54
139	TAN2206_SW-80_12-13cm	2024-05-15 16:36:49	4.49	3.5	5.93	9.41	16.3	37.6	64.5	79.5	94.2	114	0.0035	0.00593	0.00941	0.0163	0.0376	0.0645	0.0795	0.0942	0.114	8.15843	7.39775	6.73159	5.93898	4.73312	3.95456	3.6529	3.40813	3.13289	-3.07869	-0.769672	-5.02554	-0.761445	1.53112		53.5	0.97	2.885	1.053	0.26	0.14	0.23	0.35	0.69	0.7	0.99	1.17	1.54
140	TAN2206_SW-80_12-13cm	2024-05-15 16:37:12	4.48	3.51	5.95	9.46	16.3	37.7	64.6	79.4	93.8	113	0.00351	0.00595	0.00946	0.0163	0.0377	0.0646	0.0794	0.0938	0.113	8.15431	7.39289	6.72394	5.93898	4.72929	3.95232	3.65472	3.41427	3.14561	-3.06923	-0.767307	-5.00871	-0.758895	1.5262		54	0.546	2.875	0.957	0.26	0.14	0.23	0.35	0.69	0.69	0.99	1.17	1.54
141	TAN2206_SW-80_12-13cm	2024-05-15 16:37:36	4.49	3.52	5.98	9.51	16.4	37.9	65.1	80.6	95.8	117	0.00352	0.00598	0.00951	0.0164	0.0379	0.0651	0.0806	0.0958	0.117	8.15021	7.38564	6.71634	5.93016	4.72166	3.9412	3.63308	3.38383	3.09542	-3.08326	-0.770816	-5.05479	-0.765877	1.53669		53.3	1.465	2.899	1.165	0.26	0.14	0.22	0.35	0.68	0.69	0.98	1.16	1.53
142	TAN2206_SW-80_12-13cm	2024-05-15 16:38:01	4.48	3.51	5.96	9.48	16.4	37.8	64.8	80.1	95.1	116	0.00351	0.00596	0.00948	0.0164	0.0378	0.0648	0.0801	0.0951	0.116	8.15431	7.39047	6.7209	5.93016	4.72547	3.94786	3.64205	3.39441	3.1078	-3.07884	-0.769711	-5.04651	-0.764623	1.53433		53.1	1.198	2.892	1.113	0.26	0.14	0.23	0.35	0.69	0.69	0.99	1.16	1.53
143	Average of 'TAN2206_SW-80_12-13cm'	2024-05-15 16:34:24	4.47	3.51	5.94	9.43	16.3	37.8	64.8	80.1	95.1	116	0.00351	0.00594	0.00943	0.0163	0.0378	0.0648	0.0801	0.0951	0.116	8.15431	7.39532	6.72853	5.93898	4.72547	3.94786	3.64205	3.39441	3.1078	-3.08647	-0.771618	-5.04651	-0.764623	1.53624		53.3	1.267	2.894	1.119	0.26	0.14	0.22	0.35	0.68	0.69	0.99	1.17	1.54
144	TAN2206_SW-80_13-14cm	2024-05-17 14:43:09	4.52	3.39	6.01	9.93	17.6	39.6	66.5	81.8	96.7	118	0.00339	0.00601	0.00993	0.0176	0.0396	0.0665	0.0818	0.0967	0.118	8.2045	7.37842	6.65399	5.82828	4.65836	3.9105	3.61176	3.37034	3.08314	-3.04224	-0.760559	-5.12136	-0.775963	1.53652		54.4	1.069	2.932	1.06	0.47	0.18	0.27	0.39	0.7	0.69	0.96	1.12	1.46
145	TAN2206_SW-80_13-14cm	2024-05-17 14:43:34	4.5	3.41	6.06	10	17.7	39.6	66.4	81.5	96.2	117	0.00341	0.00606	0.01	0.0177	0.0396	0.0664	0.0815	0.0962	0.117	8.19601	7.36647	6.64386	5.82011	4.65836	3.91267	3.61706	3.37782	3.09542	-3.0268	-0.7567	-5.10059	-0.772817	1.52952		54.4	1.029	2.919	1.045	0.47	0.18	0.27	0.39	0.69	0.68	0.95	1.11	1.45
146	TAN2206_SW-80_13-14cm	2024-05-17 14:43:58	4.51	3.42	6.09	10.1	17.7	39.7	66.5	81.8	96.6	117	0.00342	0.00609	0.0101	0.0177	0.0397	0.0665	0.0818	0.0966	0.117	8.19179	7.35934	6.6295	5.82011	4.65472	3.9105	3.61176	3.37183	3.09542	-3.01775	-0.754436	-5.09637	-0.772177	1.52661		54.4	1.063	2.919	1.056	0.46	0.18	0.27	0.38	0.69	0.68	0.95	1.11	1.44
147	TAN2206_SW-80_13-14cm	2024-05-17 14:44:22	4.52	3.43	6.11	10.1	17.8	39.7	66.6	81.8	96.5	117	0.00343	0.00611	0.0101	0.0178	0.0397	0.0666	0.0818	0.0965	0.117	8.18758	7.35461	6.6295	5.81198	4.65472	3.90833	3.61176	3.37333	3.09542	-3.01775	-0.754436	-5.09216	-0.771539	1.52598		54.4	1.035	2.915	1.049	0.46	0.18	0.27	0.38	0.69	0.67	0.94	1.1	1.43
148	TAN2206_SW-80_13-14cm	2024-05-17 14:44:46	4.51	3.43	6.11	10.1	17.8	39.6	66.4	81.5	96.2	117	0.00343	0.00611	0.0101	0.0178	0.0396	0.0664	0.0815	0.0962	0.117	8.18758	7.35461	6.6295	5.81198	4.65836	3.91267	3.61706	3.37782	3.09542	-3.01244	-0.753111	-5.09216	-0.771539	1.52465		54.2	1.059	2.912	1.053	0.46	0.18	0.27	0.38	0.69	0.67	0.94	1.1	1.43
149	TAN2206_SW-80_13-14cm	2024-05-17 14:45:09	4.52	3.44	6.14	10.2	17.9	39.8	66.6	81.8	96.6	117	0.00344	0.00614	0.0102	0.0179	0.0398	0.0666	0.0818	0.0966	0.117	8.18338	7.34755	6.61529	5.8039	4.65109	3.90833	3.61176	3.37183	3.09542	-3.00353	-0.750883	-5.08796	-0.770902	1.52179		54.3	1.056	2.912	1.054	0.46	0.18	0.27	0.38	0.69	0.67	0.94	1.09	1.42
150	TAN2206_SW-80_13-14cm	2024-05-17 14:45:33	4.5	3.44	6.15	10.2	17.9	39.8	66.5	81.7	96.4	117	0.00344	0.00615	0.0102	0.0179	0.0398	0.0665	0.0817	0.0964	0.117	8.18338	7.3452	6.61529	5.8039	4.65109	3.9105	3.61352	3.37482	3.09542	-3.00177	-0.750442	-5.08796	-0.770902	1.52134		54.4	1.042	2.909	1.048	0.46	0.18	0.27	0.38	0.69	0.67	0.94	1.09	1.42
151	TAN2206_SW-80_13-14cm	2024-05-17 14:45:56	4.51	3.44	6.15	10.2	17.9	39.8	66.5	81.8	96.6	118	0.00344	0.00615	0.0102	0.0179	0.0398	0.0665	0.0818	0.0966	0.118	8.18338	7.3452	6.61529	5.8039	4.65109	3.9105	3.61176	3.37183	3.08314	-3.00353	-0.750883	-5.10023	-0.772763	1.52365		54.1	1.103	2.912	1.067	0.46	0.18	0.27	0.38	0.69	0.67	0.94	1.09	1.42
152	TAN2206_SW-80_13-14cm	2024-05-17 14:46:20	4.52	3.44	6.16	10.2	17.9	39.7	66.6	81.8	96.7	118	0.00344	0.00616	0.0102	0.0179	0.0397	0.0666	0.0818	0.0967	0.118	8.18338	7.34285	6.61529	5.8039	4.65472	3.90833	3.61176	3.37034	3.08314	-3.00353	-0.750883	-5.10023	-0.772763	1.52365		54.2	1.071	2.911	1.06	0.46	0.18	0.27	0.38	0.69	0.67	0.94	1.09	1.41
153	TAN2206_SW-80_13-14cm	2024-05-17 14:46:45	4.51	3.45	6.18	10.2	18	39.8	66.6	81.8	96.6	117	0.00345	0.00618	0.0102	0.018	0.0398	0.0666	0.0818	0.0966	0.117	8.17919	7.33818	6.61529	5.79586	4.65109	3.90833	3.61176	3.37183	3.09542	-3.00353	-0.750883	-5.08377	-0.770268	1.52115		54.2	1.063	2.908	1.055	0.46	0.18	0.27	0.38	0.68	0.67	0.93	1.09	1.41
154	Average of 'TAN2206_SW-80_13-14cm'	2024-05-17 14:43:09	4.51	3.43	6.12	10.1	17.8	39.7	66.5	81.7	96.5	117	0.00343	0.00612	0.0101	0.0178	0.0397	0.0665	0.0817	0.0965	0.117	8.18758	7.35225	6.6295	5.81198	4.65472	3.9105	3.61352	3.37333	3.09542	-3.01598	-0.753995	-5.09216	-0.771539	1.52553		54.3	1.059	2.915	1.055	0.46	0.18	0.27	0.38	0.69	0.67	0.94	1.1	1.43
155	TAN2206_SW-80_14-15cm	2024-05-17 14:56:08	4.39	3.44	6.07	9.98	17.6	40.1	67.5	83	98	119	0.00344	0.00607	0.00998	0.0176	0.0401	0.0675	0.083	0.098	0.119	8.18338	7.36409	6.64674	5.82828	4.64025	3.88897	3.59074	3.35107	3.07097	-3.056	-0.764	-5.11241	-0.774607	1.53861		55.5	0.995	2.937	1.047	0.46	0.17	0.26	0.38	0.68	0.67	0.95	1.11	1.45
156	TAN2206_SW-80_14-15cm	2024-05-17 14:56:31	4.41	3.45	6.12	10.1	17.7	40.2	67.8	83.4	98.6	120	0.00345	0.00612	0.0101	0.0177	0.0402	0.0678	0.0834	0.0986	0.12	8.17919	7.35225	6.6295	5.82011	4.63666	3.88257	3.58381	3.34227	3.05889	-3.04569	-0.761423	-5.12029	-0.775802	1.53723		55.5	1.238	2.937	1.095	0.45	0.17	0.26	0.38	0.68	0.67	0.94	1.1	1.44
157	TAN2206_SW-80_14-15cm	2024-05-17 14:56:55	4.42	3.47	6.14	10.1	17.8	40.2	67.7	83.3	98.4	120	0.00347	0.00614	0.0101	0.0178	0.0402	0.0677	0.0833	0.0984	0.12	8.17085	7.34755	6.6295	5.81198	4.63666	3.8847	3.58554	3.3452	3.05889	-3.04396	-0.76099	-5.11195	-0.774539	1.53553		55.4	1.22	2.931	1.09	0.45	0.17	0.26	0.37	0.68	0.67	0.93	1.1	1.43
158	TAN2206_SW-80_14-15cm	2024-05-17 14:57:18	4.43	3.48	6.17	10.2	17.9	40.3	67.7	83.3	98.4	120	0.00348	0.00617	0.0102	0.0179	0.0403	0.0677	0.0833	0.0984	0.12	8.1667	7.34051	6.61529	5.8039	4.63308	3.8847	3.58554	3.3452	3.05889	-3.02975	-0.757437	-5.1078	-0.77391	1.53135		55.5	1.226	2.928	1.089	0.45	0.17	0.26	0.37	0.67	0.66	0.93	1.09	1.42
159	TAN2206_SW-80_14-15cm	2024-05-17 14:57:42	4.43	3.49	6.21	10.2	18	40.4	68	83.6	98.7	120	0.00349	0.00621	0.0102	0.018	0.0404	0.068	0.0836	0.0987	0.12	8.16256	7.33119	6.61529	5.79586	4.6295	3.87832	3.58035	3.34081	3.05889	-3.03493	-0.758733	-5.10366	-0.773282	1.53202		55.6	1.197	2.925	1.082	0.44	0.17	0.26	0.37	0.67	0.66	0.92	1.08	1.41
160	TAN2206_SW-80_14-15cm	2024-05-17 14:58:06	4.44	3.48	6.2	10.2	17.9	40.3	67.8	83.3	98.4	120	0.00348	0.0062	0.0102	0.0179	0.0403	0.0678	0.0833	0.0984	0.12	8.1667	7.33352	6.61529	5.8039	4.63308	3.88257	3.58554	3.3452	3.05889	-3.02975	-0.757437	-5.1078	-0.77391	1.53135		55.4	1.236	2.924	1.091	0.44	0.17	0.26	0.37	0.67	0.66	0.93	1.08	1.41
161	TAN2206_SW-80_14-15cm	2024-05-17 14:58:29	4.44	3.49	6.21	10.2	18	40.3	67.9	83.5	98.8	121	0.00349	0.00621	0.0102	0.018	0.0403	0.0679	0.0835	0.0988	0.121	8.16256	7.33119	6.61529	5.79586	4.63308	3.88044	3.58208	3.33935	3.04692	-3.03321	-0.758302	-5.11564	-0.775096	1.5334		55.3	1.333	2.928	1.115	0.44	0.17	0.26	0.37	0.67	0.66	0.93	1.08	1.41
162	TAN2206_SW-80_14-15cm	2024-05-17 14:58:54	4.44	3.49	6.22	10.3	18	40.4	67.8	83.3	98.2	119	0.00349	0.00622	0.0103	0.018	0.0404	0.0678	0.0833	0.0982	0.119	8.16256	7.32887	6.60121	5.79586	4.6295	3.88257	3.58554	3.34813	3.07097	-3.01567	-0.753918	-5.09159	-0.771453	1.52537		55.6	0.967	2.918	1.037	0.45	0.17	0.26	0.37	0.67	0.66	0.92	1.08	1.4
163	TAN2206_SW-80_14-15cm	2024-05-17 14:59:18	4.44	3.48	6.2	10.2	17.9	40.2	67.6	82.9	97.5	118	0.00348	0.0062	0.0102	0.0179	0.0402	0.0676	0.0829	0.0975	0.118	8.1667	7.33352	6.61529	5.8039	4.63666	3.88683	3.59248	3.35845	3.08314	-3.0228	-0.755701	-5.08356	-0.770236	1.52594		55.8	0.819	2.913	0.996	0.45	0.17	0.26	0.38	0.67	0.66	0.93	1.08	1.41
164	TAN2206_SW-80_14-15cm	2024-05-17 14:59:42	4.45	3.49	6.23	10.3	18	40.4	67.9	83.4	98.4	120	0.00349	0.00623	0.0103	0.018	0.0404	0.0679	0.0834	0.0984	0.12	8.16256	7.32655	6.60121	5.79586	4.6295	3.88044	3.58381	3.3452	3.05889	-3.0174	-0.754351	-5.10366	-0.773282	1.52763		55.6	0.977	2.919	1.04	0.45	0.17	0.26	0.37	0.67	0.66	0.92	1.08	1.4
165	Average of 'TAN2206_SW-80_14-15cm'	2024-05-17 14:56:08	4.43	3.47	6.18	10.2	17.9	40.3	67.8	83.3	98.3	120	0.00347	0.00618	0.0102	0.0179	0.0403	0.0678	0.0833	0.0983	0.12	8.17085	7.33818	6.61529	5.8039	4.63308	3.88257	3.58554	3.34666	3.05889	-3.02975	-0.757437	-5.11195	-0.774539	1.53198		55.5	1.128	2.926	1.069	0.45	0.17	0.26	0.37	0.67	0.66	0.93	1.09	1.42
166	TAN2206_SW-80_15-16cm	2024-05-17 15:06:51	4.44	3.51	6.23	10.3	18.5	41.1	68.4	83.7	98.6	120	0.00351	0.00623	0.0103	0.0185	0.0411	0.0684	0.0837	0.0986	0.12	8.15431	7.32655	6.60121	5.75633	4.60472	3.86986	3.57863	3.34227	3.05889	-3.02258	-0.755646	-5.09542	-0.772033	1.52768		56	0.952	2.915	1.021	0.43	0.16	0.25	0.36	0.66	0.66	0.92	1.08	1.42
167	TAN2206_SW-80_15-16cm	2024-05-17 15:07:16	4.45	3.53	6.25	10.4	18.5	41	68.2	83.5	98.4	119	0.00353	0.00625	0.0104	0.0185	0.041	0.0682	0.0835	0.0984	0.119	8.14612	7.32193	6.58727	5.75633	4.60823	3.87408	3.58208	3.3452	3.07097	-3.00519	-0.751298	-5.07515	-0.768962	1.52026		55.7	0.965	2.909	1.024	0.42	0.16	0.25	0.36	0.66	0.65	0.92	1.08	1.41
168	TAN2206_SW-80_15-16cm	2024-05-17 15:07:39	4.47	3.53	6.27	10.4	18.5	41	68.2	83.5	98.3	119	0.00353	0.00627	0.0104	0.0185	0.041	0.0682	0.0835	0.0983	0.119	8.14612	7.31732	6.58727	5.75633	4.60823	3.87408	3.58208	3.34666	3.07097	-3.00519	-0.751298	-5.07515	-0.768962	1.52026		55.7	0.954	2.906	1.021	0.42	0.16	0.25	0.36	0.66	0.65	0.92	1.07	1.4
169	TAN2206_SW-80_15-16cm	2024-05-17 15:08:03	4.48	3.55	6.31	10.5	18.7	41.1	68.2	83.2	97.6	118	0.00355	0.00631	0.0105	0.0187	0.0411	0.0682	0.0832	0.0976	0.118	8.13797	7.30814	6.57347	5.74082	4.60472	3.87408	3.58727	3.35698	3.08314	-2.98619	-0.746549	-5.05482	-0.765882	1.51243		56.1	0.765	2.893	0.965	0.42	0.16	0.25	0.36	0.66	0.65	0.91	1.07	1.39
170	TAN2206_SW-80_15-16cm	2024-05-17 15:08:26	4.49	3.55	6.33	10.5	18.7	41.1	68.3	83.5	98.2	119	0.00355	0.00633	0.0105	0.0187	0.0411	0.0683	0.0835	0.0982	0.119	8.13797	7.30358	6.57347	5.74082	4.60472	3.87197	3.58208	3.34813	3.07097	-2.99139	-0.747847	-5.067	-0.767727	1.51557		55.8	0.942	2.898	1.015	0.41	0.16	0.25	0.36	0.66	0.65	0.91	1.06	1.39
171	TAN2206_SW-80_15-16cm	2024-05-17 15:08:52	4.48	3.56	6.35	10.6	18.8	41.2	68.3	83.5	98.1	119	0.00356	0.00635	0.0106	0.0188	0.0412	0.0683	0.0835	0.0981	0.119	8.13391	7.29903	6.55979	5.73312	4.60121	3.87197	3.58208	3.3496	3.07097	-2.97771	-0.744428	-5.06294	-0.767112	1.51154		55.9	0.917	2.894	1.007	0.41	0.17	0.25	0.36	0.66	0.65	0.91	1.06	1.38
172	TAN2206_SW-80_15-16cm	2024-05-17 15:09:15	4.49	3.56	6.36	10.6	18.8	41.3	68.4	83.6	98.4	119	0.00356	0.00636	0.0106	0.0188	0.0413	0.0684	0.0836	0.0984	0.119	8.13391	7.29676	6.55979	5.73312	4.59771	3.86986	3.58035	3.3452	3.07097	-2.97944	-0.74486	-5.06294	-0.767112	1.51197		55.8	0.936	2.896	1.013	0.41	0.17	0.25	0.36	0.66	0.65	0.91	1.06	1.38
173	TAN2206_SW-80_15-16cm	2024-05-17 15:09:39	4.49	3.56	6.37	10.6	18.9	41.3	68.6	84.1	99.2	121	0.00356	0.00637	0.0106	0.0189	0.0413	0.0686	0.0841	0.0992	0.121	8.13391	7.29449	6.55979	5.72547	4.59771	3.86565	3.57175	3.33352	3.04692	-2.98804	-0.74701	-5.08699	-0.770755	1.51777		55.7	1.201	2.902	1.071	0.42	0.17	0.25	0.36	0.66	0.64	0.9	1.05	1.37
174	TAN2206_SW-80_15-16cm	2024-05-17 15:10:02	4.48	3.56	6.38	10.6	18.9	41.3	68.5	83.8	98.6	120	0.00356	0.00638	0.0106	0.0189	0.0413	0.0685	0.0838	0.0986	0.12	8.13391	7.29223	6.55979	5.72547	4.59771	3.86775	3.57691	3.34227	3.05889	-2.98289	-0.745721	-5.07501	-0.768941	1.51466		55.9	0.933	2.896	1.013	0.42	0.17	0.25	0.36	0.66	0.65	0.9	1.05	1.37
175	TAN2206_SW-80_15-16cm	2024-05-17 15:10:26	4.49	3.55	6.36	10.6	18.8	41.1	68.1	83.1	97.4	117	0.00355	0.00636	0.0106	0.0188	0.0411	0.0681	0.0831	0.0974	0.117	8.13797	7.29676	6.55979	5.73312	4.60472	3.8762	3.58901	3.35993	3.09542	-2.97078	-0.742696	-5.04255	-0.764022	1.50672		56.2	0.735	2.886	0.955	0.42	0.17	0.25	0.36	0.66	0.65	0.91	1.06	1.37
176	Average of 'TAN2206_SW-80_15-16cm'	2024-05-17 15:06:51	4.47	3.55	6.32	10.5	18.7	41.2	68.3	83.5	98.2	119	0.00355	0.00632	0.0105	0.0187	0.0412	0.0683	0.0835	0.0982	0.119	8.13797	7.30586	6.57347	5.74082	4.60121	3.87197	3.58208	3.34813	3.07097	-2.99139	-0.747847	-5.067	-0.767727	1.51557		55.9	0.937	2.9	1.012	0.42	0.17	0.25	0.36	0.66	0.65	0.91	1.07	1.39
177	TAN2206_SW-80_16-17cm	2024-05-17 15:18:48	4.51	3.55	6.32	10.6	19	42.2	69.9	85.3	100	121	0.00355	0.00632	0.0106	0.019	0.0422	0.0699	0.0853	0.1	0.121	8.13797	7.30586	6.55979	5.71786	4.56661	3.83856	3.55131	3.32193	3.04692	-3.00848	-0.75212	-5.09104	-0.77137	1.52349		57.4	0.834	2.922	0.985	0.44	0.17	0.25	0.36	0.65	0.64	0.9	1.06	1.39
178	TAN2206_SW-80_16-17cm	2024-05-17 15:19:13	4.53	3.57	6.38	10.7	19.2	42.3	70	85.4	101	122	0.00357	0.00638	0.0107	0.0192	0.0423	0.07	0.0854	0.101	0.122	8.12986	7.29223	6.54625	5.70275	4.5632	3.8365	3.54962	3.30757	3.03505	-2.99663	-0.749156	-5.09481	-0.771941	1.5211		57.3	0.846	2.916	0.988	0.43	0.17	0.25	0.36	0.65	0.64	0.9	1.05	1.37
179	TAN2206_SW-80_16-17cm	2024-05-17 15:19:36	4.53	3.58	6.41	10.7	19.2	42.3	70.2	85.7	101	123	0.00358	0.00641	0.0107	0.0192	0.0423	0.0702	0.0857	0.101	0.123	8.12582	7.28546	6.54625	5.70275	4.5632	3.83239	3.54456	3.30757	3.02327	-3.00168	-0.750421	-5.10255	-0.773114	1.52354		57.1	1.128	2.918	1.049	0.43	0.17	0.25	0.36	0.64	0.63	0.89	1.05	1.37
180	TAN2206_SW-80_16-17cm	2024-05-17 15:20:00	4.55	3.59	6.43	10.8	19.3	42.3	70.1	85.5	101	122	0.00359	0.00643	0.0108	0.0193	0.0423	0.0701	0.0855	0.101	0.122	8.1218	7.28097	6.53282	5.69526	4.5632	3.83444	3.54793	3.30757	3.03505	-2.98489	-0.746223	-5.08675	-0.77072	1.51694		57.2	1.067	2.912	1.032	0.43	0.17	0.25	0.36	0.64	0.63	0.89	1.04	1.36
181	TAN2206_SW-80_16-17cm	2024-05-17 15:20:23	4.55	3.59	6.44	10.8	19.3	42.3	70	85.3	100	121	0.00359	0.00644	0.0108	0.0193	0.0423	0.07	0.0853	0.1	0.121	8.1218	7.27872	6.53282	5.69526	4.5632	3.8365	3.55131	3.32193	3.04692	-2.98151	-0.745379	-5.07488	-0.768921	1.5143		57.3	0.832	2.906	0.982	0.43	0.17	0.25	0.36	0.64	0.63	0.89	1.04	1.36
182	TAN2206_SW-80_16-17cm	2024-05-17 15:20:49	4.56	3.59	6.45	10.8	19.3	42.3	69.9	85.2	100	121	0.00359	0.00645	0.0108	0.0193	0.0423	0.0699	0.0852	0.1	0.121	8.1218	7.27649	6.53282	5.69526	4.5632	3.83856	3.553	3.32193	3.04692	-2.97982	-0.744956	-5.07488	-0.768921	1.51388		57.2	0.833	2.903	0.982	0.43	0.17	0.25	0.36	0.64	0.63	0.89	1.04	1.35
183	TAN2206_SW-80_16-17cm	2024-05-17 15:21:12	4.56	3.61	6.5	10.9	19.5	42.5	70.3	85.7	101	122	0.00361	0.0065	0.0109	0.0195	0.0425	0.0703	0.0857	0.101	0.122	8.11379	7.26534	6.51953	5.68038	4.55639	3.83033	3.54456	3.30757	3.03505	-2.97497	-0.743742	-5.07874	-0.769506	1.51325		57.3	1.046	2.905	1.025	0.43	0.17	0.25	0.36	0.64	0.63	0.88	1.03	1.34
184	TAN2206_SW-80_16-17cm	2024-05-17 15:21:36	4.56	3.62	6.53	11	19.6	42.6	70.4	85.8	101	122	0.00362	0.00653	0.011	0.0196	0.0426	0.0704	0.0858	0.101	0.122	8.10979	7.2587	6.50635	5.673	4.553	3.82828	3.54288	3.30757	3.03505	-2.96347	-0.740869	-5.07475	-0.768901	1.50977		57.4	1.032	2.904	1.021	0.43	0.17	0.25	0.36	0.64	0.63	0.88	1.03	1.34
185	TAN2206_SW-80_16-17cm	2024-05-17 15:21:59	4.56	3.61	6.51	10.9	19.5	42.5	70.4	85.8	101	122	0.00361	0.00651	0.0109	0.0195	0.0425	0.0704	0.0858	0.101	0.122	8.11379	7.26313	6.51953	5.68038	4.55639	3.82828	3.54288	3.30757	3.03505	-2.97665	-0.744162	-5.07874	-0.769506	1.51367		57.4	1.022	2.905	1.021	0.43	0.17	0.25	0.36	0.64	0.63	0.88	1.03	1.34
186	TAN2206_SW-80_16-17cm	2024-05-17 15:22:23	4.55	3.61	6.53	11	19.6	42.6	70.4	85.8	101	122	0.00361	0.00653	0.011	0.0196	0.0426	0.0704	0.0858	0.101	0.122	8.11379	7.2587	6.50635	5.673	4.553	3.82828	3.54288	3.30757	3.03505	-2.96347	-0.740869	-5.07874	-0.769506	1.51037		57.4	1.023	2.904	1.02	0.43	0.17	0.25	0.36	0.64	0.63	0.88	1.03	1.33
187	Average of 'TAN2206_SW-80_16-17cm'	2024-05-17 15:18:48	4.55	3.59	6.45	10.8	19.3	42.4	70.2	85.5	101	122	0.00359	0.00645	0.0108	0.0193	0.0424	0.0702	0.0855	0.101	0.122	8.1218	7.27649	6.53282	5.69526	4.55979	3.83239	3.54793	3.30757	3.03505	-2.98489	-0.746223	-5.08675	-0.77072	1.51694		57.3	0.97	2.91	1.011	0.43	0.17	0.25	0.36	0.64	0.63	0.89	1.04	1.36
188	TAN2206_SW-80_17-18cm	2024-05-17 15:30:38	4.55	5.05	9.6	16.8	27.7	52	81.4	97.4	113	134	0.00505	0.0096	0.0168	0.0277	0.052	0.0814	0.0974	0.113	0.134	7.6295	6.70275	5.89539	5.17397	4.26534	3.61883	3.35993	3.14561	2.8997	-2.53546	-0.633865	-4.72981	-0.716637	1.3505		65.6	0.222	2.663	0.759	0.14	0.1	0.15	0.23	0.43	0.43	0.61	0.7	0.91
189	TAN2206_SW-80_17-18cm	2024-05-17 15:31:03	4.57	5.08	9.71	17	27.9	52.3	82	98.2	114	135	0.00508	0.00971	0.017	0.0279	0.0523	0.082	0.0982	0.114	0.135	7.62096	6.68631	5.87832	5.16359	4.25705	3.60823	3.34813	3.13289	2.88897	-2.53019	-0.632547	-4.73199	-0.716968	1.34951		65.9	0.241	2.664	0.767	0.14	0.1	0.15	0.23	0.43	0.43	0.6	0.69	0.9
190	TAN2206_SW-80_17-18cm	2024-05-17 15:31:26	4.58	5.11	9.81	17.2	28.1	52.6	82.7	99.3	116	138	0.00511	0.00981	0.0172	0.0281	0.0526	0.0827	0.0993	0.116	0.138	7.61246	6.67153	5.86145	5.15329	4.24879	3.59597	3.33206	3.1078	2.85726	-2.52939	-0.632346	-4.7552	-0.720485	1.35283		65.8	0.406	2.671	0.823	0.14	0.1	0.15	0.23	0.43	0.43	0.6	0.69	0.89
191	TAN2206_SW-80_17-18cm	2024-05-17 15:31:50	4.59	5.11	9.81	17.2	28.1	52.5	82.5	99	115	137	0.00511	0.00981	0.0172	0.0281	0.0525	0.0825	0.099	0.115	0.137	7.61246	6.67153	5.86145	5.15329	4.25154	3.59946	3.33643	3.12029	2.86775	-2.52502	-0.631255	-4.74471	-0.718895	1.35015		65.7	0.404	2.669	0.82	0.14	0.1	0.15	0.23	0.43	0.43	0.6	0.69	0.89
192	TAN2206_SW-80_17-18cm	2024-05-17 15:32:15	4.59	5.1	9.78	17.1	28	52.3	81.7	97.7	113	134	0.0051	0.00978	0.0171	0.028	0.0523	0.0817	0.0977	0.113	0.134	7.61529	6.67595	5.86986	5.15843	4.25705	3.61352	3.3555	3.14561	2.8997	-2.51436	-0.628591	-4.71559	-0.714484	1.34307		65.7	0.223	2.657	0.757	0.14	0.1	0.16	0.23	0.43	0.43	0.6	0.69	0.89
193	TAN2206_SW-80_17-18cm	2024-05-17 15:32:39	4.59	5.15	9.91	17.4	28.3	52.6	82.6	99.2	116	138	0.00515	0.00991	0.0174	0.0283	0.0526	0.0826	0.0992	0.116	0.138	7.60121	6.6569	5.84477	5.14305	4.24879	3.59771	3.33352	3.1078	2.85726	-2.51125	-0.627813	-4.74395	-0.718781	1.34659		65.5	0.431	2.664	0.83	0.14	0.1	0.15	0.23	0.43	0.43	0.59	0.68	0.88
194	TAN2206_SW-80_17-18cm	2024-05-17 15:33:02	4.61	5.13	9.88	17.3	28.1	52.5	82.4	98.8	115	137	0.00513	0.00988	0.0173	0.0281	0.0525	0.0824	0.0988	0.115	0.137	7.60683	6.66127	5.85308	5.15329	4.25154	3.60121	3.33935	3.12029	2.86775	-2.51374	-0.628435	-4.73907	-0.718041	1.34648		65.6	0.411	2.664	0.821	0.14	0.1	0.16	0.23	0.43	0.43	0.6	0.68	0.88
195	TAN2206_SW-80_17-18cm	2024-05-17 15:33:28	4.62	5.12	9.86	17.3	28.1	52.4	82	98.3	114	136	0.00512	0.00986	0.0173	0.0281	0.0524	0.082	0.0983	0.114	0.136	7.60964	6.6642	5.85308	5.15329	4.25429	3.60823	3.34666	3.13289	2.87832	-2.50642	-0.626605	-4.73132	-0.716867	1.34347		65.5	0.276	2.659	0.78	0.15	0.1	0.16	0.23	0.43	0.43	0.6	0.68	0.88
196	TAN2206_SW-80_17-18cm	2024-05-17 15:33:51	4.61	5.12	9.88	17.3	28.1	52.5	82.2	98.4	114	135	0.00512	0.00988	0.0173	0.0281	0.0525	0.0822	0.0984	0.114	0.135	7.60964	6.66127	5.85308	5.15329	4.25154	3.60472	3.3452	3.13289	2.88897	-2.50789	-0.626972	-4.72067	-0.715253	1.34222		65.9	0.242	2.658	0.767	0.15	0.1	0.16	0.23	0.43	0.43	0.6	0.68	0.88
197	TAN2206_SW-80_17-18cm	2024-05-17 15:34:17	4.61	5.11	9.87	17.3	28.1	52.4	81.9	98	114	135	0.00511	0.00987	0.0173	0.0281	0.0524	0.0819	0.098	0.114	0.135	7.61246	6.66273	5.85308	5.15329	4.25429	3.60999	3.35107	3.13289	2.88897	-2.50201	-0.625502	-4.72349	-0.715681	1.34118		65.6	0.25	2.656	0.768	0.15	0.1	0.16	0.23	0.43	0.43	0.6	0.68	0.88
198	Average of 'TAN2206_SW-80_17-18cm'	2024-05-17 15:30:38	4.59	5.11	9.81	17.2	28	52.4	82.1	98.4	114	136	0.00511	0.00981	0.0172	0.028	0.0524	0.0821	0.0984	0.114	0.136	7.61246	6.67153	5.86145	5.15843	4.25429	3.60647	3.3452	3.13289	2.87832	-2.51625	-0.629062	-4.73414	-0.717294	1.34636		65.7	0.318	2.663	0.791	0.14	0.1	0.15	0.23	0.43	0.43	0.6	0.69	0.89
199	TAN2206_SW-80_18-19cm	2024-05-17 15:45:34	6.05	4.48	8.38	14.6	25	49.9	80.1	96.9	113	135	0.00448	0.00838	0.0146	0.025	0.0499	0.0801	0.0969	0.113	0.135	7.80229	6.89883	6.09789	5.32193	4.32482	3.64205	3.36736	3.14561	2.88897	-2.73053	-0.682632	-4.91332	-0.744442	1.42707		64.5	0.466	2.78	0.864	0.24	0.12	0.18	0.26	0.49	0.49	0.69	0.8	1.05
200	TAN2206_SW-80_18-19cm	2024-05-17 15:45:58	6.08	4.48	8.39	14.6	25	49.7	79.8	96.5	113	135	0.00448	0.00839	0.0146	0.025	0.0497	0.0798	0.0965	0.113	0.135	7.80229	6.89711	6.09789	5.32193	4.33061	3.64747	3.37333	3.14561	2.88897	-2.72456	-0.68114	-4.91332	-0.744442	1.42558		64	0.519	2.778	0.881	0.24	0.12	0.18	0.26	0.49	0.49	0.69	0.8	1.05
201	TAN2206_SW-80_18-19cm	2024-05-17 15:46:22	6.11	4.51	8.5	14.8	25.3	50.1	80.3	97.1	114	136	0.00451	0.0085	0.0148	0.0253	0.0501	0.0803	0.0971	0.114	0.136	7.79266	6.87832	6.07826	5.30472	4.31905	3.63846	3.36438	3.13289	2.87832	-2.71387	-0.678469	-4.91434	-0.744596	1.42306		64.3	0.483	2.774	0.87	0.23	0.12	0.18	0.26	0.49	0.49	0.68	0.79	1.03
202	TAN2206_SW-80_18-19cm	2024-05-17 15:46:46	6.11	4.52	8.53	14.9	25.4	50.1	80.4	97.3	114	137	0.00452	0.00853	0.0149	0.0254	0.0501	0.0804	0.0973	0.114	0.137	7.78946	6.87324	6.06854	5.29903	4.31905	3.63666	3.36142	3.13289	2.86775	-2.70713	-0.676782	-4.92171	-0.745714	1.4225		64.3	0.504	2.774	0.878	0.23	0.12	0.18	0.26	0.49	0.49	0.68	0.79	1.03
203	TAN2206_SW-80_18-19cm	2024-05-17 15:47:09	6.1	4.52	8.55	14.9	25.4	50	80.2	96.9	113	136	0.00452	0.00855	0.0149	0.0254	0.05	0.0802	0.0969	0.113	0.136	7.78946	6.86986	6.06854	5.29903	4.32193	3.64025	3.36736	3.14561	2.87832	-2.70118	-0.675296	-4.91114	-0.744112	1.41941		64.1	0.502	2.77	0.875	0.24	0.12	0.18	0.26	0.49	0.49	0.68	0.79	1.02
204	TAN2206_SW-80_18-19cm	2024-05-17 15:47:33	6.15	4.53	8.57	15	25.4	50.1	80.3	97	113	136	0.00453	0.00857	0.015	0.0254	0.0501	0.0803	0.097	0.113	0.136	7.78627	6.86649	6.05889	5.29903	4.31905	3.63846	3.36587	3.14561	2.87832	-2.69302	-0.673256	-4.90795	-0.743629	1.41688		64.5	0.467	2.769	0.862	0.24	0.12	0.18	0.27	0.49	0.49	0.68	0.79	1.02
205	TAN2206_SW-80_18-19cm	2024-05-17 15:47:57	6.13	4.52	8.56	14.9	25.3	50	80.4	97.2	114	136	0.00452	0.00856	0.0149	0.0253	0.05	0.0804	0.0972	0.114	0.136	7.78946	6.86817	6.06854	5.30472	4.32193	3.63666	3.3629	3.13289	2.87832	-2.70564	-0.676411	-4.91114	-0.744112	1.42052		64.3	0.489	2.772	0.874	0.24	0.12	0.18	0.27	0.49	0.49	0.68	0.79	1.02
206	TAN2206_SW-80_18-19cm	2024-05-17 15:48:21	6.12	4.53	8.59	15	25.5	50.1	80.3	97.1	114	136	0.00453	0.00859	0.015	0.0255	0.0501	0.0803	0.0971	0.114	0.136	7.78627	6.86313	6.05889	5.29336	4.31905	3.63846	3.36438	3.13289	2.87832	-2.69451	-0.673627	-4.90795	-0.743629	1.41726		64	0.513	2.769	0.88	0.24	0.12	0.18	0.27	0.49	0.49	0.68	0.79	1.02
207	TAN2206_SW-80_18-19cm	2024-05-17 15:48:44	6.12	4.54	8.65	15.1	25.6	50.3	80.6	97.3	114	136	0.00454	0.00865	0.0151	0.0256	0.0503	0.0806	0.0973	0.114	0.136	7.78309	6.85308	6.04931	5.28771	4.3133	3.63308	3.36142	3.13289	2.87832	-2.68789	-0.671973	-4.90477	-0.743147	1.41512		64.6	0.459	2.766	0.86	0.24	0.12	0.18	0.27	0.49	0.49	0.68	0.78	1.01
208	TAN2206_SW-80_18-19cm	2024-05-17 15:49:08	6.11	4.52	8.59	15	25.4	50	80	96.7	113	135	0.00452	0.00859	0.015	0.0254	0.05	0.08	0.0967	0.113	0.135	7.78946	6.86313	6.05889	5.29903	4.32193	3.64386	3.37034	3.14561	2.88897	-2.68855	-0.672138	-4.90049	-0.742499	1.41464		64.2	0.476	2.765	0.863	0.24	0.12	0.18	0.27	0.49	0.49	0.68	0.79	1.02
209	Average of 'TAN2206_SW-80_18-19cm'	2024-05-17 15:45:34	6.11	4.51	8.53	14.9	25.3	50	80.2	97	113	136	0.00451	0.00853	0.0149	0.0253	0.05	0.0802	0.097	0.113	0.136	7.79266	6.87324	6.06854	5.30472	4.32193	3.64025	3.36587	3.14561	2.87832	-2.70267	-0.675668	-4.91434	-0.744596	1.42026		64.3	0.488	2.772	0.871	0.24	0.12	0.18	0.26	0.49	0.49	0.68	0.79	1.03
210	TAN2206_SW-80_19-20cm	2024-05-17 15:56:41	5.48	6.81	14.3	24.5	35.5	60.5	92.8	111	130	156	0.00681	0.0143	0.0245	0.0355	0.0605	0.0928	0.111	0.13	0.156	7.19813	6.12784	5.35107	4.81604	4.04692	3.42973	3.17137	2.94342	2.68038	-2.17971	-0.544927	-4.51775	-0.684507	1.22943		70.4	1.018	2.513	0.96	0.005	0.07	0.11	0.17	0.31	0.31	0.44	0.5	0.65
211	TAN2206_SW-80_19-20cm	2024-05-17 15:57:05	5.48	6.82	14.4	24.5	35.5	60.5	92.7	111	129	154	0.00682	0.0144	0.0245	0.0355	0.0605	0.0927	0.111	0.129	0.154	7.19601	6.11779	5.35107	4.81604	4.04692	3.43129	3.17137	2.95456	2.699	-2.17971	-0.544927	-4.49701	-0.681366	1.22629		70.7	0.629	2.504	0.865	0.005	0.07	0.11	0.17	0.32	0.31	0.44	0.5	0.64
212	TAN2206_SW-80_19-20cm	2024-05-17 15:57:28	5.51	6.81	14.3	24.5	35.5	60.3	92.2	110	128	153	0.00681	0.0143	0.0245	0.0355	0.0603	0.0922	0.11	0.128	0.153	7.19813	6.12784	5.35107	4.81604	4.0517	3.43909	3.18442	2.96578	2.7084	-2.16665	-0.541662	-4.48973	-0.680263	1.22193		70.6	0.622	2.5	0.856	0.005	0.07	0.12	0.17	0.32	0.32	0.44	0.5	0.65
213	TAN2206_SW-80_19-20cm	2024-05-17 15:57:54	5.52	6.83	14.4	24.5	35.5	60.4	92.5	111	129	154	0.00683	0.0144	0.0245	0.0355	0.0604	0.0925	0.111	0.129	0.154	7.1939	6.11779	5.35107	4.81604	4.04931	3.4344	3.17137	2.95456	2.699	-2.17971	-0.544927	-4.4949	-0.681046	1.22597		70.6	0.633	2.502	0.866	0.005	0.07	0.12	0.17	0.32	0.32	0.44	0.5	0.64
214	TAN2206_SW-80_19-20cm	2024-05-17 15:58:17	5.52	6.86	14.5	24.6	35.6	60.4	92.5	111	129	153	0.00686	0.0145	0.0246	0.0356	0.0604	0.0925	0.111	0.129	0.153	7.18758	6.1078	5.3452	4.81198	4.04931	3.4344	3.17137	2.95456	2.7084	-2.17383	-0.543457	-4.47918	-0.678664	1.22212		70.7	0.62	2.499	0.858	0.005	0.08	0.12	0.17	0.32	0.32	0.44	0.5	0.64
215	TAN2206_SW-80_19-20cm	2024-05-17 15:58:41	5.53	6.87	14.6	24.7	35.6	60.5	92.5	111	129	153	0.00687	0.0146	0.0247	0.0356	0.0605	0.0925	0.111	0.129	0.153	7.18547	6.09789	5.33935	4.81198	4.04692	3.4344	3.17137	2.95456	2.7084	-2.16798	-0.541994	-4.47708	-0.678345	1.22034		70.7	0.63	2.497	0.861	0.005	0.08	0.12	0.17	0.32	0.32	0.44	0.49	0.64
216	TAN2206_SW-80_19-20cm	2024-05-17 15:59:04	5.52	6.86	14.6	24.6	35.6	60.4	92.5	111	129	154	0.00686	0.0146	0.0246	0.0356	0.0604	0.0925	0.111	0.129	0.154	7.18758	6.09789	5.3452	4.81198	4.04931	3.4344	3.17137	2.95456	2.699	-2.17383	-0.543457	-4.48858	-0.680088	1.22354		70.5	0.623	2.5	0.863	0.006	0.08	0.12	0.17	0.32	0.32	0.44	0.5	0.64
217	TAN2206_SW-80_19-20cm	2024-05-17 15:59:30	5.53	6.88	14.6	24.7	35.6	60.3	92.2	110	128	153	0.00688	0.0146	0.0247	0.0356	0.0603	0.0922	0.11	0.128	0.153	7.18338	6.09789	5.33935	4.81198	4.0517	3.43909	3.18442	2.96578	2.7084	-2.15492	-0.53873	-4.47498	-0.678027	1.21676		70.4	0.654	2.495	0.868	0.006	0.08	0.12	0.17	0.32	0.32	0.44	0.49	0.64
218	TAN2206_SW-80_19-20cm	2024-05-17 15:59:54	5.54	6.89	14.7	24.8	35.7	60.5	92.5	111	129	153	0.00689	0.0147	0.0248	0.0357	0.0605	0.0925	0.111	0.129	0.153	7.18128	6.08804	5.33352	4.80793	4.04692	3.4344	3.17137	2.95456	2.7084	-2.16215	-0.540537	-4.47288	-0.67771	1.21825		70.6	0.627	2.495	0.86	0.006	0.08	0.12	0.17	0.32	0.32	0.44	0.49	0.63
219	TAN2206_SW-80_19-20cm	2024-05-17 16:00:18	5.52	6.9	14.7	24.8	35.7	60.5	92.6	111	129	153	0.0069	0.0147	0.0248	0.0357	0.0605	0.0926	0.111	0.129	0.153	7.17919	6.08804	5.33352	4.80793	4.04692	3.43284	3.17137	2.95456	2.7084	-2.16215	-0.540537	-4.47079	-0.677393	1.21793		70.7	0.617	2.494	0.857	0.006	0.08	0.12	0.17	0.32	0.32	0.44	0.49	0.63
220	Average of 'TAN2206_SW-80_19-20cm'	2024-05-17 15:56:41	5.51	6.85	14.5	24.6	35.6	60.4	92.5	111	129	154	0.00685	0.0145	0.0246	0.0356	0.0604	0.0925	0.111	0.129	0.154	7.18968	6.1078	5.3452	4.81198	4.04931	3.4344	3.17137	2.95456	2.699	-2.17383	-0.543457	-4.49068	-0.680406	1.22386		70.6	0.673	2.5	0.872	0.005	0.08	0.12	0.17	0.32	0.32	0.44	0.5	0.64
221	TAN2206_SW-80_20-21cm	2024-05-17 16:07:35	7.81	8.02	17.7	29	40.5	66.7	101	120	139	166	0.00802	0.0177	0.029	0.0405	0.0667	0.101	0.12	0.139	0.166	6.96218	5.82011	5.1078	4.62593	3.90617	3.30757	3.05889	2.84684	2.59074	-2.04891	-0.512227	-4.37144	-0.662339	1.17457		76.4	1.031	2.443	0.93	6e-05	0.02	0.1	0.15	0.28	0.27	0.38	0.42	0.54
222	TAN2206_SW-80_20-21cm	2024-05-17 16:07:59	7.82	8.02	17.7	28.9	40.4	66.6	100	120	140	166	0.00802	0.0177	0.0289	0.0404	0.0666	0.1	0.12	0.14	0.166	6.96218	5.82011	5.11279	4.6295	3.90833	3.32193	3.05889	2.8365	2.59074	-2.05389	-0.513473	-4.37144	-0.662339	1.17581		76.1	0.846	2.443	0.901	6e-05	0.02	0.1	0.15	0.28	0.27	0.38	0.42	0.54
223	TAN2206_SW-80_20-21cm	2024-05-17 16:08:22	7.81	8.06	17.8	29	40.5	66.6	101	120	139	166	0.00806	0.0178	0.029	0.0405	0.0666	0.101	0.12	0.139	0.166	6.955	5.81198	5.1078	4.62593	3.90833	3.30757	3.05889	2.84684	2.59074	-2.04891	-0.512227	-4.36426	-0.661251	1.17348		76.2	0.834	2.44	0.897	6e-05	0.02	0.1	0.15	0.28	0.27	0.37	0.42	0.54
224	TAN2206_SW-80_20-21cm	2024-05-17 16:08:46	7.83	8.06	17.8	28.9	40.4	66.5	100	120	140	166	0.00806	0.0178	0.0289	0.0404	0.0665	0.1	0.12	0.14	0.166	6.955	5.81198	5.11279	4.6295	3.9105	3.32193	3.05889	2.8365	2.59074	-2.05389	-0.513473	-4.36426	-0.661251	1.17472		76.1	1.058	2.442	0.941	6e-05	0.02	0.1	0.15	0.28	0.27	0.38	0.42	0.54
225	TAN2206_SW-80_20-21cm	2024-05-17 16:09:10	7.86	8.08	17.8	29	40.4	66.5	100	120	139	165	0.00808	0.0178	0.029	0.0404	0.0665	0.1	0.12	0.139	0.165	6.95143	5.81198	5.1078	4.6295	3.9105	3.32193	3.05889	2.84684	2.59946	-2.04891	-0.512227	-4.35197	-0.659389	1.17162		76.1	1.023	2.438	0.929	6e-05	0.02	0.1	0.15	0.28	0.27	0.37	0.42	0.53
226	TAN2206_SW-80_20-21cm	2024-05-17 16:09:34	7.87	8.13	18	29.1	40.5	66.6	100	120	139	166	0.00813	0.018	0.0291	0.0405	0.0666	0.1	0.12	0.139	0.166	6.94253	5.79586	5.10284	4.62593	3.90833	3.32193	3.05889	2.84684	2.59074	-2.04394	-0.510986	-4.35178	-0.659361	1.17035		76	1.066	2.436	0.943	6e-05	0.02	0.1	0.15	0.28	0.27	0.37	0.42	0.53
227	TAN2206_SW-80_20-21cm	2024-05-17 16:09:57	7.86	8.14	18	29.1	40.5	66.6	100	120	139	166	0.00814	0.018	0.0291	0.0405	0.0666	0.1	0.12	0.139	0.166	6.94076	5.79586	5.10284	4.62593	3.90833	3.32193	3.05889	2.84684	2.59074	-2.04394	-0.510986	-4.35001	-0.659093	1.17008		76	1.046	2.434	0.936	6e-05	0.02	0.1	0.15	0.28	0.27	0.37	0.42	0.53
228	TAN2206_SW-80_20-21cm	2024-05-17 16:10:21	7.88	8.16	18	29.1	40.6	66.6	100	119	138	162	0.00816	0.018	0.0291	0.0406	0.0666	0.1	0.119	0.138	0.162	6.93722	5.79586	5.10284	4.62238	3.90833	3.32193	3.07097	2.85726	2.62593	-2.03187	-0.507968	-4.31128	-0.653224	1.16119		76.4	0.497	2.422	0.798	6e-05	0.02	0.1	0.15	0.28	0.27	0.37	0.42	0.53
229	TAN2206_SW-80_20-21cm	2024-05-17 16:10:45	7.89	8.24	18.2	29.4	40.8	66.8	101	120	140	166	0.00824	0.0182	0.0294	0.0408	0.0668	0.101	0.12	0.14	0.166	6.92314	5.77992	5.08804	4.61529	3.90401	3.30757	3.05889	2.8365	2.59074	-2.02915	-0.507287	-4.3324	-0.656423	1.16371		76.2	1.061	2.429	0.939	6e-05	0.02	0.1	0.15	0.28	0.27	0.37	0.41	0.52
230	TAN2206_SW-80_20-21cm	2024-05-17 16:11:08	7.9	8.2	18.1	29.2	40.6	66.6	100	119	138	163	0.0082	0.0181	0.0292	0.0406	0.0666	0.1	0.119	0.138	0.163	6.93016	5.78787	5.09789	4.62238	3.90833	3.32193	3.07097	2.85726	2.61706	-2.02692	-0.50673	-4.3131	-0.653501	1.16023		76.4	0.513	2.421	0.804	6e-05	0.02	0.1	0.15	0.28	0.27	0.37	0.41	0.53
231	Average of 'TAN2206_SW-80_20-21cm'	2024-05-17 16:07:35	7.85	8.11	17.9	29.1	40.5	66.6	100	120	139	165	0.00811	0.0179	0.0291	0.0405	0.0666	0.1	0.12	0.139	0.165	6.94608	5.8039	5.10284	4.62593	3.90833	3.32193	3.05889	2.84684	2.59946	-2.04394	-0.510986	-4.34662	-0.658579	1.16956		76.2	0.912	2.435	0.904	6e-05	0.02	0.1	0.15	0.28	0.27	0.37	0.42	0.53
232	TAN2206_SW-80_21-22cm	2024-05-17 16:18:57	9.02	5.7	11.3	20.2	32.6	60.9	96	116	135	160	0.0057	0.0113	0.0202	0.0326	0.0609	0.096	0.116	0.135	0.16	7.45482	6.46753	5.6295	4.93898	4.03741	3.38082	3.1078	2.88897	2.64386	-2.5217	-0.630424	-4.81097	-0.728934	1.35936		76.4	0.385	2.697	0.822	0.07	0.09	0.13	0.2	0.38	0.38	0.53	0.62	0.8
233	TAN2206_SW-80_21-22cm	2024-05-17 16:19:21	9.02	5.73	11.5	20.3	32.7	61	96.1	116	135	159	0.00573	0.0115	0.0203	0.0327	0.061	0.0961	0.116	0.135	0.159	7.44725	6.44222	5.62238	4.93457	4.03505	3.37932	3.1078	2.88897	2.6529	-2.51457	-0.628643	-4.79435	-0.726416	1.35506		76.6	0.341	2.69	0.807	0.07	0.09	0.13	0.2	0.38	0.38	0.53	0.61	0.8
234	TAN2206_SW-80_21-22cm	2024-05-17 16:19:44	9.06	5.73	11.5	20.4	32.7	61	95.8	115	134	159	0.00573	0.0115	0.0204	0.0327	0.061	0.0958	0.115	0.134	0.159	7.44725	6.44222	5.61529	4.93457	4.03505	3.38383	3.12029	2.8997	2.6529	-2.49499	-0.623748	-4.79435	-0.726416	1.35016		76.4	0.353	2.687	0.808	0.07	0.09	0.14	0.2	0.38	0.38	0.53	0.61	0.79
235	TAN2206_SW-80_21-22cm	2024-05-17 16:20:08	9.06	5.75	11.5	20.4	32.8	61.1	95.9	115	134	159	0.00575	0.0115	0.0204	0.0328	0.0611	0.0959	0.115	0.134	0.159	7.44222	6.44222	5.61529	4.93016	4.03268	3.38233	3.12029	2.8997	2.6529	-2.49499	-0.623748	-4.78932	-0.725655	1.3494		76.6	0.335	2.685	0.801	0.07	0.09	0.14	0.2	0.38	0.38	0.53	0.61	0.79
236	TAN2206_SW-80_21-22cm	2024-05-17 16:20:31	9.08	5.77	11.6	20.5	32.9	61.1	96.2	116	135	160	0.00577	0.0116	0.0205	0.0329	0.0611	0.0962	0.116	0.135	0.16	7.43721	6.42973	5.60823	4.92577	4.03268	3.37782	3.1078	2.88897	2.64386	-2.50043	-0.625107	-4.79336	-0.726266	1.35137		76.5	0.377	2.687	0.818	0.07	0.09	0.14	0.2	0.38	0.38	0.53	0.61	0.79
237	TAN2206_SW-80_21-22cm	2024-05-17 16:20:57	9.13	5.78	11.6	20.6	32.9	61.2	96.2	116	135	160	0.00578	0.0116	0.0206	0.0329	0.0612	0.0962	0.116	0.135	0.16	7.43471	6.42973	5.60121	4.92577	4.03032	3.37782	3.1078	2.88897	2.64386	-2.49341	-0.623352	-4.79086	-0.725888	1.34924		76.5	0.344	2.684	0.808	0.07	0.09	0.14	0.2	0.38	0.38	0.53	0.61	0.78
238	TAN2206_SW-80_21-22cm	2024-05-17 16:21:20	9.14	5.79	11.7	20.7	33	61.2	96.3	116	135	160	0.00579	0.0117	0.0207	0.033	0.0612	0.0963	0.116	0.135	0.16	7.43222	6.41735	5.59423	4.92139	4.03032	3.37632	3.1078	2.88897	2.64386	-2.48642	-0.621606	-4.78836	-0.72551	1.34712		76.4	0.409	2.685	0.827	0.07	0.09	0.14	0.2	0.38	0.38	0.53	0.61	0.78
239	TAN2206_SW-80_21-22cm	2024-05-17 16:21:44	9.16	5.77	11.6	20.6	32.9	61.1	96	115	134	159	0.00577	0.0116	0.0206	0.0329	0.0611	0.096	0.115	0.134	0.159	7.43721	6.42973	5.60121	4.92577	4.03268	3.38082	3.12029	2.8997	2.6529	-2.48092	-0.620229	-4.78431	-0.724896	1.34513		76.7	0.335	2.683	0.801	0.07	0.09	0.14	0.2	0.38	0.38	0.53	0.61	0.78
240	TAN2206_SW-80_21-22cm	2024-05-17 16:22:07	9.24	5.81	11.7	20.8	33.1	61.4	96.4	116	135	160	0.00581	0.0117	0.0208	0.0331	0.0614	0.0964	0.116	0.135	0.16	7.42725	6.41735	5.58727	4.91702	4.02562	3.37482	3.1078	2.88897	2.64386	-2.47947	-0.619867	-4.78339	-0.724756	1.34462		76.7	0.34	2.681	0.805	0.07	0.09	0.14	0.2	0.38	0.38	0.53	0.6	0.78
241	TAN2206_SW-80_21-22cm	2024-05-17 16:22:33	9.2	5.77	11.7	20.6	32.9	61.1	95.9	115	134	159	0.00577	0.0117	0.0206	0.0329	0.0611	0.0959	0.115	0.134	0.159	7.43721	6.41735	5.60121	4.92577	4.03268	3.38233	3.12029	2.8997	2.6529	-2.48092	-0.620229	-4.78431	-0.724896	1.34513		76.5	0.341	2.681	0.803	0.07	0.09	0.14	0.2	0.38	0.38	0.53	0.61	0.78
242	Average of 'TAN2206_SW-80_21-22cm'	2024-05-17 16:18:57	9.11	5.76	11.6	20.5	32.8	61.1	96.1	116	135	160	0.00576	0.0116	0.0205	0.0328	0.0611	0.0961	0.116	0.135	0.16	7.43972	6.42973	5.60823	4.93016	4.03268	3.37932	3.1078	2.88897	2.64386	-2.50043	-0.625107	-4.79586	-0.726645	1.35175		76.5	0.357	2.686	0.81	0.07	0.09	0.14	0.2	0.38	0.38	0.53	0.61	0.79
243	TAN2206_SW-80_22-23cm	2024-05-17 16:29:40	6.7	5.27	10.5	18.8	31.4	60.4	96.1	116	135	160	0.00527	0.0105	0.0188	0.0314	0.0604	0.0961	0.116	0.135	0.16	7.56798	6.57347	5.73312	4.99309	4.04931	3.37932	3.1078	2.88897	2.64386	-2.62532	-0.65633	-4.92413	-0.74608	1.40241		77.4	0.314	2.771	0.81	0.14	0.1	0.15	0.22	0.41	0.41	0.58	0.67	0.87
244	TAN2206_SW-80_22-23cm	2024-05-17 16:30:04	6.73	5.29	10.5	18.9	31.4	60.5	96.1	116	135	160	0.00529	0.0105	0.0189	0.0314	0.0605	0.0961	0.116	0.135	0.16	7.56252	6.57347	5.72547	4.99309	4.04692	3.37932	3.1078	2.88897	2.64386	-2.61767	-0.654417	-4.91866	-0.745252	1.39967		77.6	0.298	2.765	0.803	0.14	0.1	0.15	0.22	0.41	0.41	0.58	0.67	0.86
245	TAN2206_SW-80_22-23cm	2024-05-17 16:30:30	6.73	5.29	10.5	18.9	31.4	60.2	95.6	115	134	159	0.00529	0.0105	0.0189	0.0314	0.0602	0.0956	0.115	0.134	0.159	7.56252	6.57347	5.72547	4.99309	4.05409	3.38685	3.12029	2.8997	2.6529	-2.60518	-0.651294	-4.90962	-0.743881	1.39518		77	0.319	2.762	0.808	0.14	0.1	0.15	0.22	0.41	0.41	0.58	0.67	0.86
246	TAN2206_SW-80_22-23cm	2024-05-17 16:30:55	6.75	5.31	10.6	19	31.5	60.4	96.1	116	135	160	0.00531	0.0106	0.019	0.0315	0.0604	0.0961	0.116	0.135	0.16	7.55707	6.55979	5.71786	4.9885	4.04931	3.37932	3.1078	2.88897	2.64386	-2.61005	-0.652513	-4.91322	-0.744427	1.39694		77.3	0.31	2.763	0.809	0.14	0.1	0.15	0.22	0.41	0.41	0.57	0.66	0.86
247	TAN2206_SW-80_22-23cm	2024-05-17 16:31:19	6.77	5.3	10.6	18.9	31.4	60.2	95.6	115	134	159	0.0053	0.0106	0.0189	0.0314	0.0602	0.0956	0.115	0.134	0.159	7.55979	6.55979	5.72547	4.99309	4.05409	3.38685	3.12029	2.8997	2.6529	-2.60518	-0.651294	-4.90689	-0.743468	1.39476		77	0.318	2.76	0.807	0.14	0.1	0.15	0.22	0.41	0.41	0.57	0.67	0.86
248	TAN2206_SW-80_22-23cm	2024-05-17 16:31:42	6.78	5.33	10.7	19.1	31.6	60.4	95.7	115	134	159	0.00533	0.0107	0.0191	0.0316	0.0604	0.0957	0.115	0.134	0.159	7.55165	6.54625	5.71028	4.98393	4.04931	3.38534	3.12029	2.8997	2.6529	-2.58999	-0.647497	-4.89875	-0.742234	1.38973		77.3	0.303	2.754	0.8	0.14	0.1	0.15	0.22	0.41	0.41	0.57	0.66	0.85
249	TAN2206_SW-80_22-23cm	2024-05-17 16:32:06	6.79	5.35	10.7	19.2	31.7	60.7	96.2	116	135	160	0.00535	0.0107	0.0192	0.0317	0.0607	0.0962	0.116	0.135	0.16	7.54625	6.54625	5.70275	4.97937	4.04216	3.37782	3.1078	2.88897	2.64386	-2.59495	-0.648737	-4.90239	-0.742786	1.39152		77.5	0.301	2.756	0.801	0.14	0.1	0.15	0.22	0.41	0.41	0.57	0.66	0.85
250	TAN2206_SW-80_22-23cm	2024-05-17 16:32:29	6.77	5.38	10.8	19.3	31.8	60.9	96.5	116	135	160	0.00538	0.0108	0.0193	0.0318	0.0609	0.0965	0.116	0.135	0.16	7.53818	6.53282	5.69526	4.97483	4.03741	3.37333	3.1078	2.88897	2.64386	-2.58745	-0.646863	-4.89432	-0.741564	1.38843		77.8	0.287	2.754	0.797	0.14	0.1	0.15	0.22	0.41	0.4	0.57	0.65	0.84
251	TAN2206_SW-80_22-23cm	2024-05-17 16:32:54	6.81	5.33	10.7	19.1	31.6	60.4	95.9	116	135	160	0.00533	0.0107	0.0191	0.0316	0.0604	0.0959	0.116	0.135	0.16	7.55165	6.54625	5.71028	4.98393	4.04931	3.38233	3.1078	2.88897	2.64386	-2.60248	-0.65062	-4.90779	-0.743605	1.39422		77.1	0.322	2.757	0.81	0.15	0.1	0.15	0.22	0.41	0.41	0.57	0.66	0.85
252	TAN2206_SW-80_22-23cm	2024-05-17 16:33:19	6.77	5.32	10.7	19.1	31.5	60.4	95.8	115	134	159	0.00532	0.0107	0.0191	0.0315	0.0604	0.0958	0.115	0.134	0.159	7.55436	6.54625	5.71028	4.9885	4.04931	3.38383	3.12029	2.8997	2.6529	-2.58999	-0.647497	-4.90146	-0.742645	1.39014		77.2	0.312	2.757	0.805	0.15	0.1	0.15	0.22	0.41	0.41	0.57	0.66	0.85
253	Average of 'TAN2206_SW-80_22-23cm'	2024-05-17 16:29:40	6.76	5.32	10.6	19	31.5	60.4	96	116	135	160	0.00532	0.0106	0.019	0.0315	0.0604	0.096	0.116	0.135	0.16	7.55436	6.55979	5.71786	4.9885	4.04931	3.38082	3.1078	2.88897	2.64386	-2.61005	-0.652513	-4.9105	-0.744015	1.39653		77.3	0.309	2.76	0.805	0.14	0.1	0.15	0.22	0.41	0.41	0.57	0.66	0.86
254	TAN2206_SW-80_23-24cm	2024-05-17 16:40:20	6.27	6.09	12.5	22.4	35.1	64.1	101	122	143	171	0.00609	0.0125	0.0224	0.0351	0.0641	0.101	0.122	0.143	0.171	7.35934	6.32193	5.48036	4.83239	3.96353	3.30757	3.03505	2.80591	2.54793	-2.44531	-0.611328	-4.81141	-0.729002	1.34033		79	0.612	2.683	0.888	0.07	0.08	0.12	0.19	0.35	0.35	0.49	0.57	0.74
255	TAN2206_SW-80_23-24cm	2024-05-17 16:40:43	6.29	6.11	12.6	22.5	35.2	64.2	101	122	143	171	0.00611	0.0126	0.0225	0.0352	0.0642	0.101	0.122	0.143	0.171	7.35461	6.31043	5.47393	4.82828	3.96128	3.30757	3.03505	2.80591	2.54793	-2.43888	-0.609721	-4.80668	-0.728285	1.33801		79.1	0.62	2.681	0.89	0.07	0.08	0.13	0.19	0.35	0.35	0.49	0.57	0.74
256	TAN2206_SW-80_23-24cm	2024-05-17 16:41:08	6.29	6.14	12.8	22.6	35.3	64.3	102	123	143	171	0.00614	0.0128	0.0226	0.0353	0.0643	0.102	0.123	0.143	0.171	7.34755	6.28771	5.46753	4.82419	3.95904	3.29336	3.02327	2.80591	2.54793	-2.44426	-0.611066	-4.79961	-0.727214	1.33828		79	0.615	2.678	0.89	0.07	0.08	0.13	0.19	0.35	0.35	0.49	0.57	0.73
257	TAN2206_SW-80_23-24cm	2024-05-17 16:41:31	6.31	6.17	12.8	22.8	35.4	64.5	102	123	143	172	0.00617	0.0128	0.0228	0.0354	0.0645	0.102	0.123	0.143	0.172	7.34051	6.28771	5.45482	4.82011	3.95456	3.29336	3.02327	2.80591	2.53952	-2.43155	-0.607888	-4.80099	-0.727423	1.33531		79	0.626	2.676	0.895	0.07	0.08	0.13	0.19	0.35	0.35	0.49	0.56	0.73
258	TAN2206_SW-80_23-24cm	2024-05-17 16:41:55	6.3	6.15	12.8	22.6	35.3	64.3	101	122	142	169	0.00615	0.0128	0.0226	0.0353	0.0643	0.101	0.122	0.142	0.169	7.3452	6.28771	5.46753	4.82419	3.95904	3.30757	3.03505	2.81604	2.5649	-2.43249	-0.608122	-4.78029	-0.724287	1.33241		79.4	0.416	2.669	0.83	0.07	0.08	0.13	0.19	0.35	0.35	0.49	0.57	0.73
259	TAN2206_SW-80_23-24cm	2024-05-17 16:42:18	6.33	6.2	13	22.9	35.6	64.7	102	123	143	172	0.0062	0.013	0.0229	0.0356	0.0647	0.102	0.123	0.143	0.172	7.33352	6.26534	5.44851	4.81198	3.95009	3.29336	3.02327	2.80591	2.53952	-2.42524	-0.60631	-4.794	-0.726363	1.33267		79.3	0.614	2.673	0.889	0.07	0.08	0.13	0.19	0.35	0.35	0.49	0.56	0.72
260	TAN2206_SW-80_23-24cm	2024-05-17 16:42:42	6.35	6.21	13	22.9	35.6	64.7	102	123	143	172	0.00621	0.013	0.0229	0.0356	0.0647	0.102	0.123	0.143	0.172	7.33119	6.26534	5.44851	4.81198	3.95009	3.29336	3.02327	2.80591	2.53952	-2.42524	-0.60631	-4.79167	-0.726011	1.33232		79.3	0.609	2.671	0.887	0.07	0.08	0.13	0.19	0.35	0.35	0.49	0.56	0.72
261	TAN2206_SW-80_23-24cm	2024-05-17 16:43:06	6.38	6.19	13	22.9	35.5	64.4	101	122	143	171	0.00619	0.013	0.0229	0.0355	0.0644	0.101	0.122	0.143	0.171	7.33584	6.26534	5.44851	4.81604	3.9568	3.30757	3.03505	2.80591	2.54793	-2.41346	-0.603365	-4.78791	-0.725441	1.32881		79.1	0.607	2.669	0.883	0.07	0.08	0.13	0.19	0.35	0.35	0.49	0.56	0.72
262	TAN2206_SW-80_23-24cm	2024-05-17 16:43:31	6.33	6.2	13	22.9	35.6	64.6	102	123	143	171	0.0062	0.013	0.0229	0.0356	0.0646	0.102	0.123	0.143	0.171	7.33352	6.26534	5.44851	4.81198	3.95232	3.29336	3.02327	2.80591	2.54793	-2.42524	-0.60631	-4.78558	-0.725089	1.3314		79.3	0.608	2.67	0.884	0.07	0.08	0.13	0.19	0.35	0.35	0.49	0.56	0.72
263	TAN2206_SW-80_23-24cm	2024-05-17 16:43:56	6.32	6.2	13	22.9	35.5	64.5	102	123	143	172	0.0062	0.013	0.0229	0.0355	0.0645	0.102	0.123	0.143	0.172	7.33352	6.26534	5.44851	4.81604	3.95456	3.29336	3.02327	2.80591	2.53952	-2.42524	-0.60631	-4.794	-0.726363	1.33267		79	0.627	2.672	0.893	0.07	0.09	0.13	0.19	0.35	0.35	0.49	0.56	0.72
264	Average of 'TAN2206_SW-80_23-24cm'	2024-05-17 16:40:20	6.32	6.17	12.8	22.7	35.4	64.4	102	123	143	171	0.00617	0.0128	0.0227	0.0354	0.0644	0.102	0.123	0.143	0.171	7.34051	6.28771	5.46116	4.82011	3.9568	3.29336	3.02327	2.80591	2.54793	-2.43789	-0.609474	-4.79258	-0.726149	1.33562		79.1	0.598	2.674	0.883	0.07	0.08	0.13	0.19	0.35	0.35	0.49	0.57	0.73
265	TAN2206_SW-80_24-25cm	2024-05-17 16:50:48	7.09	5.94	12	21.4	34.2	64.2	103	124	145	174	0.00594	0.012	0.0214	0.0342	0.0642	0.103	0.124	0.145	0.174	7.39532	6.38082	5.54625	4.86986	3.96128	3.27928	3.01159	2.78588	2.52284	-2.53466	-0.633664	-4.87248	-0.738255	1.37192		80.2	0.563	2.719	0.892	0.006	0.08	0.13	0.19	0.36	0.37	0.52	0.6	0.78
266	TAN2206_SW-80_24-25cm	2024-05-17 16:51:12	7.11	5.97	12.1	21.5	34.3	64.4	103	125	146	175	0.00597	0.0121	0.0215	0.0343	0.0644	0.103	0.125	0.146	0.175	7.38805	6.36885	5.53952	4.86565	3.9568	3.27928	3	2.77596	2.51457	-2.53952	-0.63488	-4.87348	-0.738406	1.37329		80.3	0.573	2.718	0.897	0.006	0.08	0.13	0.19	0.36	0.36	0.51	0.6	0.77
267	TAN2206_SW-80_24-25cm	2024-05-17 16:51:37	7.14	6	12.2	21.7	34.5	64.5	103	125	146	175	0.006	0.0122	0.0217	0.0345	0.0645	0.103	0.125	0.146	0.175	7.38082	6.35698	5.52616	4.85726	3.95456	3.27928	3	2.77596	2.51457	-2.52616	-0.63154	-4.86625	-0.73731	1.36885		80.4	0.562	2.712	0.892	0.006	0.08	0.13	0.19	0.36	0.36	0.51	0.59	0.76
268	TAN2206_SW-80_24-25cm	2024-05-17 16:52:00	7.17	5.99	12.2	21.6	34.4	64.3	103	124	145	173	0.00599	0.0122	0.0216	0.0344	0.0643	0.103	0.124	0.145	0.173	7.38323	6.35698	5.53282	4.86145	3.95904	3.27928	3.01159	2.78588	2.53116	-2.52124	-0.630309	-4.85207	-0.735162	1.36547		80.4	0.552	2.71	0.885	0.006	0.08	0.13	0.19	0.36	0.37	0.51	0.59	0.77
269	TAN2206_SW-80_24-25cm	2024-05-17 16:52:26	7.15	5.94	12.1	21.6	34.3	64.3	103	124	145	174	0.00594	0.0121	0.0216	0.0343	0.0643	0.103	0.124	0.145	0.174	7.39532	6.36885	5.53282	4.86565	3.95904	3.27928	3.01159	2.78588	2.52284	-2.52124	-0.630309	-4.87248	-0.738255	1.36856		80.3	0.558	2.722	0.889	0.07	0.08	0.13	0.19	0.36	0.36	0.51	0.59	0.76
270	TAN2206_SW-80_24-25cm	2024-05-17 16:52:50	7.2	5.98	12.2	21.8	34.6	64.5	103	125	146	175	0.00598	0.0122	0.0218	0.0346	0.0645	0.103	0.125	0.146	0.175	7.38564	6.35698	5.51953	4.85308	3.95456	3.27928	3	2.77596	2.51457	-2.51953	-0.629882	-4.87107	-0.73804	1.36792		80.2	0.572	2.719	0.894	0.07	0.08	0.13	0.19	0.36	0.36	0.51	0.59	0.76
271	TAN2206_SW-80_24-25cm	2024-05-17 16:53:14	7.21	5.94	12.1	21.6	34.3	64.2	102	124	145	173	0.00594	0.0121	0.0216	0.0343	0.0642	0.102	0.124	0.145	0.173	7.39532	6.36885	5.53282	4.86565	3.96128	3.29336	3.01159	2.78588	2.53116	-2.52124	-0.630309	-4.86417	-0.736995	1.3673		80.2	0.563	2.72	0.887	0.07	0.08	0.13	0.19	0.37	0.37	0.51	0.59	0.76
272	TAN2206_SW-80_24-25cm	2024-05-17 16:53:37	7.19	5.96	12.2	21.7	34.5	64.4	103	124	146	175	0.00596	0.0122	0.0217	0.0345	0.0644	0.103	0.124	0.146	0.175	7.39047	6.35698	5.52616	4.85726	3.9568	3.27928	3.01159	2.77596	2.51457	-2.51457	-0.628643	-4.8759	-0.738773	1.36742		80.2	0.566	2.721	0.893	0.07	0.08	0.13	0.19	0.36	0.36	0.51	0.59	0.76
273	TAN2206_SW-80_24-25cm	2024-05-17 16:54:01	7.2	5.98	12.3	21.8	34.6	64.5	103	124	145	174	0.00598	0.0123	0.0218	0.0346	0.0645	0.103	0.124	0.145	0.174	7.38564	6.3452	5.51953	4.85308	3.95456	3.27928	3.01159	2.78588	2.52284	-2.50794	-0.626985	-4.8628	-0.736788	1.36377		80.5	0.551	2.715	0.882	0.07	0.08	0.13	0.19	0.36	0.36	0.51	0.59	0.75
274	TAN2206_SW-80_24-25cm	2024-05-17 16:54:25	7.2	5.97	12.2	21.7	34.5	64.2	102	123	143	171	0.00597	0.0122	0.0217	0.0345	0.0642	0.102	0.123	0.143	0.171	7.38805	6.35698	5.52616	4.85726	3.96128	3.29336	3.02327	2.80591	2.54793	-2.50289	-0.625723	-4.84012	-0.733352	1.35907		80.4	0.388	2.707	0.833	0.07	0.08	0.13	0.19	0.37	0.37	0.51	0.59	0.76
275	Average of 'TAN2206_SW-80_24-25cm'	2024-05-17 16:50:48	7.17	5.97	12.2	21.7	34.4	64.3	103	124	145	174	0.00597	0.0122	0.0217	0.0344	0.0643	0.103	0.124	0.145	0.174	7.38805	6.35698	5.52616	4.86145	3.95904	3.27928	3.01159	2.78588	2.52284	-2.51457	-0.628643	-4.86521	-0.737153	1.3658		80.3	0.548	2.716	0.885	0.04	0.08	0.13	0.19	0.36	0.36	0.51	0.59	0.76
276	TAN2206_SW-80_25-26cm	2024-05-20 10:24:30	6.94	9.52	20.7	31.3	43.1	72.8	113	136	159	190	0.00952	0.0207	0.0313	0.0431	0.0728	0.113	0.136	0.159	0.19	6.71482	5.59423	4.99769	4.53617	3.77992	3.14561	2.87832	2.6529	2.39593	-2.11937	-0.529843	-4.31889	-0.654378	1.18422		84.4	1.097	2.442	1	0	0.0002	0.05	0.13	0.24	0.24	0.33	0.38	0.48
277	TAN2206_SW-80_25-26cm	2024-05-20 10:24:53	6.97	9.5	20.7	31.2	43	72.7	112	135	157	186	0.0095	0.0207	0.0312	0.043	0.0727	0.112	0.135	0.157	0.186	6.71786	5.59423	5.00231	4.53952	3.7819	3.15843	2.88897	2.67116	2.42663	-2.11334	-0.528335	-4.29123	-0.650187	1.17852		84.7	0.595	2.434	0.88	0	0.0002	0.05	0.13	0.24	0.24	0.33	0.38	0.48
278	TAN2206_SW-80_25-26cm	2024-05-20 10:25:17	7	9.51	20.7	31.2	43	72.5	112	135	157	186	0.00951	0.0207	0.0312	0.043	0.0725	0.112	0.135	0.157	0.186	6.71634	5.59423	5.00231	4.53952	3.78588	3.15843	2.88897	2.67116	2.42663	-2.11334	-0.528335	-4.28971	-0.649957	1.17829		84.5	0.589	2.43	0.878	0	0.0002	0.05	0.13	0.25	0.24	0.33	0.38	0.47
279	TAN2206_SW-80_25-26cm	2024-05-20 10:25:40	6.99	9.41	20.6	31.1	42.8	72.3	111	134	156	184	0.00941	0.0206	0.0311	0.0428	0.0723	0.111	0.134	0.156	0.184	6.73159	5.60121	5.00694	4.54625	3.78986	3.17137	2.8997	2.68038	2.44222	-2.10725	-0.526812	-4.28937	-0.649904	1.17672		84.5	0.51	2.438	0.853	5e-05	0.01	0.09	0.13	0.25	0.24	0.33	0.37	0.47
280	TAN2206_SW-80_25-26cm	2024-05-20 10:26:04	6.94	9.47	20.7	31.2	43	72.6	112	135	157	185	0.00947	0.0207	0.0312	0.043	0.0726	0.112	0.135	0.157	0.185	6.72242	5.59423	5.00231	4.53952	3.78389	3.15843	2.88897	2.67116	2.4344	-2.11334	-0.528335	-4.28802	-0.6497	1.17803		84.6	0.574	2.44	0.872	5e-05	0.01	0.09	0.13	0.25	0.24	0.33	0.37	0.47
281	TAN2206_SW-80_25-26cm	2024-05-20 10:26:28	6.98	9.47	20.6	31.2	42.9	72.5	112	135	157	185	0.00947	0.0206	0.0312	0.0429	0.0725	0.112	0.135	0.157	0.185	6.72242	5.60121	5.00231	4.54288	3.78588	3.15843	2.88897	2.67116	2.4344	-2.11334	-0.528335	-4.28802	-0.6497	1.17803		84.6	0.565	2.439	0.87	6e-05	0.01	0.09	0.13	0.25	0.24	0.33	0.37	0.47
282	TAN2206_SW-80_25-26cm	2024-05-20 10:26:52	6.94	9.49	20.7	31.2	42.9	72.6	112	135	158	188	0.00949	0.0207	0.0312	0.0429	0.0726	0.112	0.135	0.158	0.188	6.71938	5.59423	5.00231	4.54288	3.78389	3.15843	2.88897	2.662	2.4112	-2.11334	-0.528335	-4.30818	-0.652755	1.18109		84.3	0.662	2.445	0.904	6e-05	0.01	0.09	0.13	0.25	0.24	0.33	0.37	0.47
283	TAN2206_SW-80_25-26cm	2024-05-20 10:27:15	6.96	9.53	20.8	31.3	43	72.5	112	134	156	185	0.00953	0.0208	0.0313	0.043	0.0725	0.112	0.134	0.156	0.185	6.71331	5.58727	4.99769	4.53952	3.78588	3.15843	2.8997	2.68038	2.4344	-2.098	-0.5245	-4.27891	-0.648319	1.17282		84.7	0.515	2.434	0.856	6e-05	0.01	0.09	0.13	0.25	0.24	0.33	0.37	0.47
284	TAN2206_SW-80_25-26cm	2024-05-20 10:27:41	6.98	9.47	20.7	31.1	42.8	72.4	112	134	156	185	0.00947	0.0207	0.0311	0.0428	0.0724	0.112	0.134	0.156	0.185	6.72242	5.59423	5.00694	4.54625	3.78787	3.15843	2.8997	2.68038	2.4344	-2.10725	-0.526812	-4.28802	-0.6497	1.17651		84.5	0.542	2.438	0.865	6e-05	0.02	0.09	0.13	0.25	0.24	0.33	0.37	0.47
285	TAN2206_SW-80_25-26cm	2024-05-20 10:28:05	6.97	9.52	20.7	31.2	42.9	72.4	112	134	156	184	0.00952	0.0207	0.0312	0.0429	0.0724	0.112	0.134	0.156	0.184	6.71482	5.59423	5.00231	4.54288	3.78787	3.15843	2.8997	2.68038	2.44222	-2.10262	-0.525654	-4.2726	-0.647364	1.17302		84.7	0.467	2.432	0.841	6e-05	0.02	0.09	0.13	0.25	0.24	0.33	0.37	0.47
286	Average of 'TAN2206_SW-80_25-26cm'	2024-05-20 10:24:30	6.97	9.49	20.7	31.2	42.9	72.5	112	135	157	186	0.00949	0.0207	0.0312	0.0429	0.0725	0.112	0.135	0.157	0.186	6.71938	5.59423	5.00231	4.54288	3.78588	3.15843	2.88897	2.67116	2.42663	-2.11334	-0.528335	-4.29275	-0.650417	1.17875		84.6	0.624	2.437	0.884	4e-05	0.01	0.08	0.13	0.25	0.24	0.33	0.37	0.47
287	TAN2206_SW-80_26-27cm	2024-05-20 10:36:00	10.52	9.05	20.1	31.6	44.2	75.2	117	140	163	196	0.00905	0.0201	0.0316	0.0442	0.0752	0.117	0.14	0.163	0.196	6.78787	5.63666	4.98393	4.49981	3.73312	3.09542	2.8365	2.61706	2.35107	-2.14743	-0.536858	-4.43679	-0.672241	1.2091		87.6	0.723	2.483	0.916	0	0.0002	0.04	0.13	0.24	0.24	0.34	0.39	0.5
288	TAN2206_SW-80_26-27cm	2024-05-20 10:36:24	10.5	9.09	20.2	31.7	44.3	75.4	117	141	164	197	0.00909	0.0202	0.0317	0.0443	0.0754	0.117	0.141	0.164	0.197	6.7815	5.6295	4.97937	4.49655	3.72929	3.09542	2.82623	2.60823	2.34373	-2.15314	-0.538285	-4.43777	-0.67239	1.21067		87.7	0.724	2.483	0.919	0	0.0002	0.04	0.13	0.25	0.24	0.34	0.39	0.5
289	TAN2206_SW-80_26-27cm	2024-05-20 10:36:48	10.51	9.1	20.2	31.7	44.2	75.1	116	140	163	195	0.0091	0.0202	0.0317	0.0442	0.0751	0.116	0.14	0.163	0.195	6.77992	5.6295	4.97937	4.49981	3.73504	3.1078	2.8365	2.61706	2.35845	-2.14287	-0.535718	-4.42146	-0.669919	1.20564		87.6	0.711	2.477	0.908	0	0.0002	0.05	0.13	0.25	0.25	0.34	0.39	0.49
290	TAN2206_SW-80_26-27cm	2024-05-20 10:37:11	10.41	9.15	20.4	31.8	44.4	75.4	117	141	164	197	0.00915	0.0204	0.0318	0.0444	0.0754	0.117	0.141	0.164	0.197	6.77201	5.61529	4.97483	4.4933	3.72929	3.09542	2.82623	2.60823	2.34373	-2.1486	-0.537149	-4.42828	-0.670952	1.2081		87.6	0.735	2.481	0.923	0	0.0002	0.05	0.13	0.25	0.25	0.34	0.39	0.49
291	TAN2206_SW-80_26-27cm	2024-05-20 10:37:35	10.47	9.16	20.4	31.8	44.4	75.3	117	140	163	196	0.00916	0.0204	0.0318	0.0444	0.0753	0.117	0.14	0.163	0.196	6.77044	5.61529	4.97483	4.4933	3.73121	3.09542	2.8365	2.61706	2.35107	-2.13833	-0.534582	-4.41936	-0.6696	1.20418		87.8	0.706	2.477	0.909	0	0.0002	0.05	0.13	0.25	0.25	0.34	0.39	0.49
292	TAN2206_SW-80_26-27cm	2024-05-20 10:38:00	10.47	9.16	20.4	31.8	44.3	75.5	117	141	164	196	0.00916	0.0204	0.0318	0.0443	0.0755	0.117	0.141	0.164	0.196	6.77044	5.61529	4.97483	4.49655	3.72738	3.09542	2.82623	2.60823	2.35107	-2.1486	-0.537149	-4.41936	-0.6696	1.20675		88.1	0.687	2.479	0.904	0	0.0002	0.05	0.13	0.25	0.25	0.34	0.39	0.49
293	TAN2206_SW-80_26-27cm	2024-05-20 10:38:24	10.49	9.22	20.6	31.9	44.5	75.5	117	141	165	197	0.00922	0.0206	0.0319	0.0445	0.0755	0.117	0.141	0.165	0.197	6.76102	5.60121	4.9703	4.49005	3.72738	3.09542	2.82623	2.59946	2.34373	-2.14407	-0.536017	-4.41729	-0.669286	1.2053		87.6	0.725	2.477	0.921	0	0.0002	0.05	0.13	0.25	0.25	0.34	0.38	0.49
294	TAN2206_SW-80_26-27cm	2024-05-20 10:38:49	10.53	9.27	20.7	32	44.6	75.7	118	141	165	197	0.00927	0.0207	0.032	0.0446	0.0757	0.118	0.141	0.165	0.197	6.75321	5.59423	4.96578	4.48681	3.72356	3.08314	2.82623	2.59946	2.34373	-2.13955	-0.534888	-4.40948	-0.668103	1.20299		88.3	0.686	2.475	0.907	0	0.0002	0.05	0.13	0.25	0.25	0.34	0.38	0.49
295	TAN2206_SW-80_26-27cm	2024-05-20 10:39:15	10.47	9.26	20.6	32	44.6	75.5	117	140	163	194	0.00926	0.0206	0.032	0.0446	0.0755	0.117	0.14	0.163	0.194	6.75477	5.60121	4.96578	4.48681	3.72738	3.09542	2.8365	2.61706	2.36587	-2.12928	-0.532321	-4.3889	-0.664985	1.19731		88	0.703	2.469	0.902	0	0.0002	0.05	0.13	0.25	0.25	0.34	0.38	0.49
296	TAN2206_SW-80_26-27cm	2024-05-20 10:39:38	10.52	9.26	20.7	32	44.6	75.7	117	141	165	197	0.00926	0.0207	0.032	0.0446	0.0757	0.117	0.141	0.165	0.197	6.75477	5.59423	4.96578	4.48681	3.72356	3.09542	2.82623	2.59946	2.34373	-2.13955	-0.534888	-4.41104	-0.668339	1.20323		88.1	0.696	2.476	0.91	0	0.0002	0.05	0.13	0.25	0.25	0.34	0.38	0.49
297	Average of 'TAN2206_SW-80_26-27cm'	2024-05-20 10:36:00	10.49	9.17	20.4	31.8	44.4	75.4	117	141	164	196	0.00917	0.0204	0.0318	0.0444	0.0754	0.117	0.141	0.164	0.196	6.76886	5.61529	4.97483	4.4933	3.72929	3.09542	2.82623	2.60823	2.35107	-2.1486	-0.537149	-4.41779	-0.669362	1.20651		87.8	0.71	2.478	0.912	0	0.0002	0.05	0.13	0.25	0.25	0.34	0.39	0.49
298	TAN2206_SW-80_27-28cm	2024-05-20 10:47:22	10.05	7.51	16.4	28	41.2	72.3	113	137	161	193	0.00751	0.0164	0.028	0.0412	0.0723	0.113	0.137	0.161	0.193	7.05697	5.93016	5.15843	4.60121	3.78986	3.14561	2.86775	2.63487	2.37333	-2.29068	-0.572669	-4.68364	-0.709643	1.28231		85.8	0.759	2.598	0.933	6e-05	0.02	0.1	0.15	0.29	0.29	0.4	0.46	0.6
299	TAN2206_SW-80_27-28cm	2024-05-20 10:47:48	10.09	7.51	16.4	28	41.1	72	113	137	160	191	0.00751	0.0164	0.028	0.0411	0.072	0.113	0.137	0.16	0.191	7.05697	5.93016	5.15843	4.60472	3.79586	3.14561	2.86775	2.64386	2.38836	-2.29068	-0.572669	-4.66862	-0.707366	1.28004		85.4	0.769	2.594	0.933	6e-05	0.02	0.1	0.15	0.29	0.29	0.41	0.47	0.6
300	TAN2206_SW-80_27-28cm	2024-05-20 10:48:11	10.1	7.56	16.5	28.1	41.3	72.4	114	137	161	192	0.00756	0.0165	0.0281	0.0413	0.0724	0.114	0.137	0.161	0.192	7.0474	5.92139	5.15329	4.59771	3.78787	3.13289	2.86775	2.63487	2.38082	-2.28553	-0.571383	-4.66658	-0.707057	1.27844		86	0.752	2.595	0.929	6e-05	0.02	0.1	0.15	0.29	0.29	0.4	0.46	0.59
301	TAN2206_SW-80_27-28cm	2024-05-20 10:48:38	10.15	7.57	16.5	28.1	41.2	72.1	113	136	159	189	0.00757	0.0165	0.0281	0.0412	0.0721	0.113	0.136	0.159	0.189	7.04549	5.92139	5.15329	4.60121	3.79386	3.14561	2.87832	2.6529	2.40354	-2.27496	-0.568741	-4.64195	-0.703326	1.27207		86	0.54	2.584	0.867	6e-05	0.02	0.1	0.15	0.29	0.29	0.4	0.46	0.59
302	TAN2206_SW-80_27-28cm	2024-05-20 10:49:03	10.16	7.64	16.7	28.4	41.5	72.6	114	137	160	192	0.00764	0.0167	0.0284	0.0415	0.0726	0.114	0.137	0.16	0.192	7.03221	5.90401	5.13797	4.59074	3.78389	3.13289	2.86775	2.64386	2.38082	-2.27021	-0.567553	-4.65139	-0.704756	1.27231		86.2	0.751	2.587	0.926	6e-05	0.02	0.1	0.15	0.29	0.29	0.4	0.46	0.59
303	TAN2206_SW-80_27-28cm	2024-05-20 10:49:29	10.16	7.62	16.7	28.3	41.3	72.4	113	137	160	192	0.00762	0.0167	0.0283	0.0413	0.0724	0.113	0.137	0.16	0.192	7.03599	5.90401	5.14305	4.59771	3.78787	3.14561	2.86775	2.64386	2.38082	-2.2753	-0.568825	-4.65517	-0.705329	1.27415		85.8	0.757	2.589	0.93	6e-05	0.02	0.1	0.16	0.29	0.29	0.4	0.46	0.59
304	TAN2206_SW-80_27-28cm	2024-05-20 10:49:52	10.22	7.59	16.6	28.2	41.3	72.4	113	137	159	190	0.00759	0.0166	0.0282	0.0413	0.0724	0.113	0.137	0.159	0.19	7.04168	5.91267	5.14816	4.59771	3.78787	3.14561	2.86775	2.6529	2.39593	-2.28041	-0.570102	-4.64576	-0.703902	1.274		86.5	0.532	2.585	0.865	6e-05	0.02	0.1	0.16	0.29	0.29	0.41	0.46	0.59
305	TAN2206_SW-80_27-28cm	2024-05-20 10:50:16	10.27	7.61	16.7	28.2	41.3	72.2	113	136	159	189	0.00761	0.0167	0.0282	0.0413	0.0722	0.113	0.136	0.159	0.189	7.03789	5.90401	5.14816	4.59771	3.79186	3.14561	2.87832	2.6529	2.40354	-2.26984	-0.56746	-4.63435	-0.702174	1.26963		86	0.538	2.58	0.866	6e-05	0.02	0.11	0.16	0.29	0.29	0.4	0.46	0.59
306	TAN2206_SW-80_27-28cm	2024-05-20 10:50:39	10.26	7.61	16.7	28.3	41.3	72.2	113	136	158	188	0.00761	0.0167	0.0283	0.0413	0.0722	0.113	0.136	0.158	0.188	7.03789	5.90401	5.14305	4.59771	3.79186	3.14561	2.87832	2.662	2.4112	-2.26473	-0.566183	-4.62669	-0.701014	1.2672		86.2	0.512	2.579	0.857	6e-05	0.02	0.11	0.16	0.29	0.29	0.41	0.46	0.59
307	TAN2206_SW-80_27-28cm	2024-05-20 10:51:05	10.26	7.63	16.8	28.3	41.4	72.3	113	136	159	189	0.00763	0.0168	0.0283	0.0414	0.0723	0.113	0.136	0.159	0.189	7.0341	5.89539	5.14305	4.59423	3.78986	3.14561	2.87832	2.6529	2.40354	-2.26473	-0.566183	-4.63056	-0.7016	1.26778		86	0.552	2.578	0.868	6e-05	0.02	0.11	0.16	0.29	0.29	0.4	0.46	0.59
308	Average of 'TAN2206_SW-80_27-28cm'	2024-05-20 10:47:22	10.17	7.58	16.6	28.2	41.3	72.3	113	137	160	190	0.00758	0.0166	0.0282	0.0413	0.0723	0.113	0.137	0.16	0.19	7.04359	5.91267	5.14816	4.59771	3.78986	3.14561	2.86775	2.64386	2.39593	-2.28041	-0.570102	-4.64766	-0.704191	1.27429		86	0.654	2.587	0.899	6e-05	0.02	0.1	0.16	0.29	0.29	0.4	0.46	0.59
309	TAN2206_SW-80_28-29cm	2024-05-20 10:59:24	8.51	27.6	39.4	49	61.1	93.4	137	162	186	219	0.0276	0.0394	0.049	0.0611	0.0934	0.137	0.162	0.186	0.219	5.17919	4.66566	4.35107	4.03268	3.42043	2.86775	2.62593	2.42663	2.191	-1.72514	-0.431285	-2.98819	-0.452756	0.884041		101	0.523	1.985	0.85	0	0	0	0	0.03	0.09	0.11	0.11	0.12
310	TAN2206_SW-80_28-29cm	2024-05-20 10:59:49	8.51	27.7	39.5	49.1	61.3	93.5	137	162	186	219	0.0277	0.0395	0.0491	0.0613	0.0935	0.137	0.162	0.186	0.219	5.17397	4.662	4.34813	4.02797	3.41889	2.86775	2.62593	2.42663	2.191	-1.7222	-0.43055	-2.98297	-0.451966	0.882515		101	0.543	1.984	0.855	0	0	0	0	0.03	0.09	0.11	0.11	0.12
311	TAN2206_SW-80_28-29cm	2024-05-20 11:00:15	8.56	27.6	39.4	49	61.1	93.3	137	162	186	218	0.0276	0.0394	0.049	0.0611	0.0933	0.137	0.162	0.186	0.218	5.17919	4.66566	4.35107	4.03268	3.42198	2.86775	2.62593	2.42663	2.1976	-1.72514	-0.431285	-2.98159	-0.451756	0.883041		101	0.543	1.984	0.855	0	0	0	0	0.04	0.09	0.11	0.11	0.12
312	TAN2206_SW-80_28-29cm	2024-05-20 11:00:38	8.57	27.5	39.3	48.9	61	93	136	161	184	216	0.0275	0.0393	0.0489	0.061	0.093	0.136	0.161	0.184	0.216	5.18442	4.66933	4.35402	4.03505	3.42663	2.87832	2.63487	2.44222	2.2109	-1.71915	-0.429789	-2.97353	-0.450535	0.880323		101	0.44	1.981	0.822	0	0	0	0	0.04	0.09	0.12	0.11	0.13
313	TAN2206_SW-80_28-29cm	2024-05-20 11:01:02	8.64	27.6	39.4	49	61.1	93.3	137	162	186	218	0.0276	0.0394	0.049	0.0611	0.0933	0.137	0.162	0.186	0.218	5.17919	4.66566	4.35107	4.03268	3.42198	2.86775	2.62593	2.42663	2.1976	-1.72514	-0.431285	-2.98159	-0.451756	0.883041		101	0.522	1.985	0.849	0	0	0	0	0.04	0.09	0.12	0.11	0.12
314	TAN2206_SW-80_28-29cm	2024-05-20 11:01:27	8.62	27.5	39.3	48.9	61	93.2	137	162	185	218	0.0275	0.0393	0.0489	0.061	0.0932	0.137	0.162	0.185	0.218	5.18442	4.66933	4.35402	4.03505	3.42353	2.86775	2.62593	2.4344	2.1976	-1.72809	-0.432022	-2.98682	-0.452549	0.884571		101	0.502	1.985	0.843	0	0	0	0	0.04	0.09	0.12	0.11	0.13
315	TAN2206_SW-80_28-29cm	2024-05-20 11:01:53	8.59	27.5	39.3	48.9	61	93	137	161	185	217	0.0275	0.0393	0.0489	0.061	0.093	0.137	0.161	0.185	0.217	5.18442	4.66933	4.35402	4.03505	3.42663	2.86775	2.63487	2.4344	2.20423	-1.71915	-0.429789	-2.98019	-0.451544	0.881333		101	0.524	1.984	0.849	0	0	0	0	0.04	0.09	0.12	0.11	0.13
316	TAN2206_SW-80_28-29cm	2024-05-20 11:02:18	8.61	27.6	39.5	49.1	61.2	93.4	137	162	186	218	0.0276	0.0395	0.0491	0.0612	0.0934	0.137	0.162	0.186	0.218	5.17919	4.662	4.34813	4.03032	3.42043	2.86775	2.62593	2.42663	2.1976	-1.7222	-0.43055	-2.98159	-0.451756	0.882305		101	0.516	1.983	0.846	0	0	0	0	0.04	0.09	0.12	0.11	0.12
317	TAN2206_SW-80_28-29cm	2024-05-20 11:02:42	8.61	27.7	39.5	49.1	61.3	93.6	138	163	187	221	0.0277	0.0395	0.0491	0.0613	0.0936	0.138	0.163	0.187	0.221	5.17397	4.662	4.34813	4.02797	3.41735	2.85726	2.61706	2.41889	2.17788	-1.73108	-0.432769	-2.99609	-0.453953	0.886722		101	0.589	1.988	0.871	0	0	0	0	0.04	0.09	0.12	0.11	0.12
318	TAN2206_SW-80_28-29cm	2024-05-20 11:03:05	8.63	27.6	39.4	49.1	61.2	93.5	137	162	186	218	0.0276	0.0394	0.0491	0.0612	0.0935	0.137	0.162	0.186	0.218	5.17919	4.66566	4.34813	4.03032	3.41889	2.86775	2.62593	2.42663	2.1976	-1.7222	-0.43055	-2.98159	-0.451756	0.882305		102	0.508	1.984	0.844	0	0	0	0	0.04	0.09	0.12	0.11	0.13
319	Average of 'TAN2206_SW-80_28-29cm'	2024-05-20 10:59:24	8.58	27.6	39.4	49	61.1	93.3	137	162	186	218	0.0276	0.0394	0.049	0.0611	0.0933	0.137	0.162	0.186	0.218	5.17919	4.66566	4.35107	4.03268	3.42198	2.86775	2.62593	2.42663	2.1976	-1.72514	-0.431285	-2.98159	-0.451756	0.883041		101	0.523	1.984	0.849	0	0	0	0	0.04	0.09	0.12	0.11	0.12
320	TAN2206_SW-80_29-30cm	2024-05-20 11:11:51	28.6	33.4	43.7	52.7	63.9	94.5	136	159	182	211	0.0334	0.0437	0.0527	0.0639	0.0945	0.136	0.159	0.182	0.211	4.90401	4.51622	4.24605	3.96804	3.40354	2.87832	2.6529	2.45799	2.24469	-1.59315	-0.398288	-2.65932	-0.402928	0.801216		100	0.558	1.795	0.867	0	0	0	0	0	0	0	0	0
321	TAN2206_SW-80_29-30cm	2024-05-20 11:12:16	28.7	33.3	43.6	52.7	63.9	94.5	136	160	182	213	0.0333	0.0436	0.0527	0.0639	0.0945	0.136	0.16	0.182	0.213	4.90833	4.51953	4.24605	3.96804	3.40354	2.87832	2.64386	2.45799	2.23107	-1.6022	-0.400549	-2.67726	-0.405645	0.806195		100	0.563	1.798	0.872	0	0	0	0	0	0	0	0	0
322	TAN2206_SW-80_29-30cm	2024-05-20 11:12:40	28.6	33.2	43.5	52.6	63.8	94.4	136	159	182	213	0.0332	0.0435	0.0526	0.0638	0.0944	0.136	0.159	0.182	0.213	4.91267	4.52284	4.24879	3.9703	3.40507	2.87832	2.6529	2.45799	2.23107	-1.59589	-0.398973	-2.6816	-0.406303	0.805276		100	0.565	1.799	0.874	0	0	0	0	0	0	0	0	0
323	TAN2206_SW-80_29-30cm	2024-05-20 11:13:05	28.5	33.3	43.6	52.6	63.8	94.3	136	159	182	211	0.0333	0.0436	0.0526	0.0638	0.0943	0.136	0.159	0.182	0.211	4.90833	4.51953	4.24879	3.9703	3.4066	2.87832	2.6529	2.45799	2.24469	-1.59589	-0.398973	-2.66365	-0.403583	0.802556		100	0.566	1.797	0.87	0	0	0	0	0	0	0	0	0
324	TAN2206_SW-80_29-30cm	2024-05-20 11:13:29	28.6	33.2	43.5	52.5	63.8	94.2	135	159	182	211	0.0332	0.0435	0.0525	0.0638	0.0942	0.135	0.159	0.182	0.211	4.91267	4.52284	4.25154	3.9703	3.40813	2.88897	2.6529	2.45799	2.24469	-1.59864	-0.399659	-2.66799	-0.404241	0.8039		100	0.573	1.797	0.872	0	0	0	0	0	0	0	0	0
325	TAN2206_SW-80_29-30cm	2024-05-20 11:13:53	28.5	33.3	43.6	52.6	63.9	94.2	136	159	182	212	0.0333	0.0436	0.0526	0.0639	0.0942	0.136	0.159	0.182	0.212	4.90833	4.51953	4.24879	3.96804	3.40813	2.87832	2.6529	2.45799	2.23786	-1.59589	-0.398973	-2.67047	-0.404617	0.80359		99.8	0.585	1.797	0.877	0	0	0	0	0	0	0	0	0
326	TAN2206_SW-80_29-30cm	2024-05-20 11:14:16	28.5	33.3	43.6	52.6	63.9	94.4	136	159	182	213	0.0333	0.0436	0.0526	0.0639	0.0944	0.136	0.159	0.182	0.213	4.90833	4.51953	4.24879	3.96804	3.40507	2.87832	2.6529	2.45799	2.23107	-1.59589	-0.398973	-2.67726	-0.405645	0.804618		100	0.572	1.8	0.876	0	0	0	0	0	0	0	0	0
327	TAN2206_SW-80_29-30cm	2024-05-20 11:14:44	28.6	33.3	43.6	52.6	63.9	94.2	135	159	181	211	0.0333	0.0436	0.0526	0.0639	0.0942	0.135	0.159	0.181	0.211	4.90833	4.51953	4.24879	3.96804	3.40813	2.88897	2.6529	2.46594	2.24469	-1.59589	-0.398973	-2.66365	-0.403583	0.802556		100	0.568	1.795	0.867	0	0	0	0	0	0	0	0	0
328	TAN2206_SW-80_29-30cm	2024-05-20 11:15:07	28.7	33.3	43.6	52.6	63.9	94.5	136	160	183	213	0.0333	0.0436	0.0526	0.0639	0.0945	0.136	0.16	0.183	0.213	4.90833	4.51953	4.24879	3.96804	3.40354	2.87832	2.64386	2.45008	2.23107	-1.60494	-0.401234	-2.67726	-0.405645	0.80688		100	0.561	1.8	0.873	0	0	0	0	0	0	0	0	0
329	TAN2206_SW-80_29-30cm	2024-05-20 11:15:31	28.6	33.3	43.6	52.6	63.9	94.4	136	159	182	212	0.0333	0.0436	0.0526	0.0639	0.0944	0.136	0.159	0.182	0.212	4.90833	4.51953	4.24879	3.96804	3.40507	2.87832	2.6529	2.45799	2.23786	-1.59589	-0.398973	-2.67047	-0.404617	0.80359		100	0.571	1.797	0.872	0	0	0	0	0	0	0	0	0
330	Average of 'TAN2206_SW-80_29-30cm'	2024-05-20 11:11:51	28.6	33.3	43.6	52.6	63.9	94.4	136	159	182	212	0.0333	0.0436	0.0526	0.0639	0.0944	0.136	0.159	0.182	0.212	4.90833	4.51953	4.24879	3.96804	3.40507	2.87832	2.6529	2.45799	2.23786	-1.59589	-0.398973	-2.67047	-0.404617	0.80359		100	0.568	1.798	0.872	0	0	0	0	0	0	0	0	0
331	TAN2206_SW-80_30-31cm	2024-05-20 11:23:33	34.4	30.9	43.7	54.2	67.5	103	152	181	208	246	0.0309	0.0437	0.0542	0.0675	0.103	0.152	0.181	0.208	0.246	5.01625	4.51622	4.20556	3.88897	3.27928	2.71786	2.46594	2.26534	2.02327	-1.73962	-0.434906	-2.99298	-0.453482	0.888388		110	0.659	1.984	0.906	0	0	0	0	0.0005	0.05	0.1	0.1	0.11
332	TAN2206_SW-80_30-31cm	2024-05-20 11:23:58	34.3	31.3	44.1	54.6	67.9	104	154	183	211	251	0.0313	0.0441	0.0546	0.0679	0.104	0.154	0.183	0.211	0.251	4.99769	4.50308	4.19496	3.88044	3.26534	2.699	2.45008	2.24469	1.99424	-1.74487	-0.436218	-3.00345	-0.455069	0.891286		110	0.975	1.991	0.994	0	0	0	0	0.0005	0.05	0.1	0.1	0.11
333	TAN2206_SW-80_30-31cm	2024-05-20 11:24:22	34.2	31.3	44.1	54.6	68	104	154	183	212	253	0.0313	0.0441	0.0546	0.068	0.104	0.154	0.183	0.212	0.253	4.99769	4.50308	4.19496	3.87832	3.26534	2.699	2.45008	2.23786	1.98279	-1.74487	-0.436218	-3.0149	-0.456803	0.893021		110	0.988	1.994	1.002	0	0	0	0	0.0005	0.05	0.1	0.1	0.11
334	TAN2206_SW-80_30-31cm	2024-05-20 11:24:47	34.3	31.1	43.9	54.4	67.8	103	153	181	209	246	0.0311	0.0439	0.0544	0.0678	0.103	0.153	0.181	0.209	0.246	5.00694	4.50964	4.20025	3.88257	3.27928	2.7084	2.46594	2.25843	2.02327	-1.73431	-0.433578	-2.98367	-0.452071	0.885649		111	0.665	1.985	0.907	0	0	0	0	0.0005	0.05	0.1	0.1	0.11
335	TAN2206_SW-80_30-31cm	2024-05-20 11:25:11	34.2	30.6	43.6	54.2	67.5	103	152	180	208	245	0.0306	0.0436	0.0542	0.0675	0.103	0.152	0.18	0.208	0.245	5.03032	4.51953	4.20556	3.88897	3.27928	2.71786	2.47393	2.26534	2.02915	-1.73163	-0.432908	-3.00118	-0.454724	0.887632		110	0.656	1.997	0.901	0	0	0	0	0.03	0.08	0.1	0.1	0.11
336	TAN2206_SW-80_30-31cm	2024-05-20 11:25:34	34.3	31.2	44	54.6	68	104	154	182	210	249	0.0312	0.044	0.0546	0.068	0.104	0.154	0.182	0.21	0.249	5.00231	4.50635	4.19496	3.87832	3.26534	2.699	2.45799	2.25154	2.00578	-1.73697	-0.434241	-2.99653	-0.454019	0.888261		111	0.693	1.988	0.918	0	0	0	0	0.0005	0.05	0.1	0.1	0.11
337	TAN2206_SW-80_30-31cm	2024-05-20 11:25:58	34.3	30.6	43.6	54.1	67.4	102	151	179	206	241	0.0306	0.0436	0.0541	0.0674	0.102	0.151	0.179	0.206	0.241	5.03032	4.51953	4.20823	3.89111	3.29336	2.72738	2.48197	2.27928	2.05289	-1.72626	-0.431565	-2.97743	-0.451126	0.88269		110	0.575	1.991	0.874	0	0	0	0	0.03	0.08	0.1	0.1	0.11
338	TAN2206_SW-80_30-31cm	2024-05-20 11:26:23	34.3	30.7	43.6	54.2	67.5	103	153	181	209	247	0.0307	0.0436	0.0542	0.0675	0.103	0.153	0.181	0.209	0.247	5.02562	4.51953	4.20556	3.88897	3.27928	2.7084	2.46594	2.25843	2.01742	-1.73962	-0.434906	-3.0082	-0.455788	0.890694		110	0.675	2	0.909	0	0	0	0	0.03	0.08	0.1	0.1	0.11
339	TAN2206_SW-80_30-31cm	2024-05-20 11:26:47	34.3	30.7	43.7	54.2	67.6	103	153	182	209	247	0.0307	0.0437	0.0542	0.0676	0.103	0.153	0.182	0.209	0.247	5.02562	4.51622	4.20556	3.88683	3.27928	2.7084	2.45799	2.25843	2.01742	-1.74757	-0.436893	-3.0082	-0.455788	0.892681		111	0.645	2.001	0.902	0	0	0	0	0.03	0.08	0.1	0.1	0.11
340	TAN2206_SW-80_30-31cm	2024-05-20 11:27:10	34.3	30.8	43.7	54.3	67.7	103	153	181	209	245	0.0308	0.0437	0.0543	0.0677	0.103	0.153	0.181	0.209	0.245	5.02093	4.51622	4.2029	3.8847	3.27928	2.7084	2.46594	2.25843	2.02915	-1.73697	-0.434241	-2.99178	-0.4533	0.887541		111	0.597	1.997	0.884	0	0	0	0	0.03	0.08	0.1	0.1	0.11
341	Average of 'TAN2206_SW-80_30-31cm'	2024-05-20 11:23:33	34.3	30.9	43.8	54.4	67.7	103	153	181	209	247	0.0309	0.0438	0.0544	0.0677	0.103	0.153	0.181	0.209	0.247	5.01625	4.51293	4.20025	3.8847	3.27928	2.7084	2.46594	2.25843	2.01742	-1.73431	-0.433578	-2.99883	-0.454369	0.887946		110	0.728	1.993	0.923	0	0	0	0	0.02	0.06	0.1	0.1	0.11
342	TAN2206_SW-80_31-32cm	2024-05-20 11:34:44	31.9	6.27	13.1	24.6	44.2	85.5	135	162	190	227	0.00627	0.0131	0.0246	0.0442	0.0855	0.135	0.162	0.19	0.227	7.31732	6.25429	5.3452	4.49981	3.54793	2.88897	2.62593	2.39593	2.13924	-2.71926	-0.679816	-5.17808	-0.784558	1.46437		107	0.429	2.927	0.824	0.13	0.08	0.13	0.19	0.35	0.35	0.48	0.55	0.71
343	TAN2206_SW-80_31-32cm	2024-05-20 11:35:09	32.3	6.27	13.1	24.5	44.1	85.4	134	161	188	224	0.00627	0.0131	0.0245	0.0441	0.0854	0.134	0.161	0.188	0.224	7.31732	6.25429	5.35107	4.50308	3.54962	2.8997	2.63487	2.4112	2.15843	-2.71621	-0.679052	-5.15889	-0.78165	1.4607		107	0.408	2.922	0.809	0.13	0.08	0.13	0.19	0.35	0.35	0.48	0.56	0.71
344	TAN2206_SW-80_31-32cm	2024-05-20 11:35:35	32.3	6.24	13	24.3	43.9	85.4	135	162	189	226	0.00624	0.013	0.0243	0.0439	0.0854	0.135	0.162	0.189	0.226	7.32424	6.26534	5.3629	4.50964	3.54962	2.88897	2.62593	2.40354	2.14561	-2.73697	-0.684241	-5.17863	-0.784641	1.46888		107	0.405	2.933	0.816	0.13	0.08	0.13	0.19	0.35	0.35	0.49	0.56	0.71
345	TAN2206_SW-80_31-32cm	2024-05-20 11:35:59	32.1	6.3	13.2	24.7	44.3	85.7	135	163	191	228	0.0063	0.0132	0.0247	0.0443	0.0857	0.135	0.163	0.191	0.228	7.31043	6.24332	5.33935	4.49655	3.54456	2.88897	2.61706	2.38836	2.13289	-2.72229	-0.680572	-5.17754	-0.784475	1.46505		107	0.422	2.928	0.823	0.13	0.08	0.13	0.19	0.35	0.35	0.48	0.55	0.7
346	TAN2206_SW-80_31-32cm	2024-05-20 11:36:23	31.6	6.19	12.9	24	43.5	84.8	134	161	187	222	0.00619	0.0129	0.024	0.0435	0.0848	0.134	0.161	0.187	0.222	7.33584	6.27649	5.38082	4.52284	3.55979	2.8997	2.63487	2.41889	2.17137	-2.74595	-0.686489	-5.16448	-0.782496	1.46899		107	0.253	2.929	0.768	0.14	0.09	0.13	0.19	0.36	0.35	0.49	0.56	0.72
347	TAN2206_SW-80_31-32cm	2024-05-20 11:36:48	32.2	6.26	13.1	24.4	43.9	85.4	135	163	190	226	0.00626	0.0131	0.0244	0.0439	0.0854	0.135	0.163	0.19	0.226	7.31962	6.25429	5.35698	4.50964	3.54962	2.88897	2.61706	2.39593	2.14561	-2.73992	-0.68498	-5.17402	-0.783942	1.46892		107	0.398	2.932	0.815	0.13	0.09	0.13	0.19	0.35	0.35	0.49	0.56	0.71
348	TAN2206_SW-80_31-32cm	2024-05-20 11:37:12	31.6	6.27	13.1	24.5	44	85.5	135	163	190	227	0.00627	0.0131	0.0245	0.044	0.0855	0.135	0.163	0.19	0.227	7.31732	6.25429	5.35107	4.50635	3.54793	2.88897	2.61706	2.39593	2.13924	-2.73402	-0.683505	-5.17808	-0.784558	1.46806		107	0.403	2.933	0.818	0.13	0.09	0.13	0.19	0.35	0.35	0.49	0.55	0.71
349	TAN2206_SW-80_31-32cm	2024-05-20 11:37:37	31.7	6.26	13.1	24.4	43.8	85	134	160	186	221	0.00626	0.0131	0.0244	0.0438	0.085	0.134	0.16	0.186	0.221	7.31962	6.25429	5.35698	4.51293	3.55639	2.8997	2.64386	2.42663	2.17788	-2.71312	-0.67828	-5.14174	-0.779052	1.45733		107	0.23	2.916	0.756	0.14	0.09	0.13	0.19	0.36	0.35	0.49	0.56	0.71
350	TAN2206_SW-80_31-32cm	2024-05-20 11:38:03	31.7	6.26	13.1	24.5	43.9	85.3	135	162	190	226	0.00626	0.0131	0.0245	0.0439	0.0853	0.135	0.162	0.19	0.226	7.31962	6.25429	5.35107	4.50964	3.55131	2.88897	2.62593	2.39593	2.14561	-2.72514	-0.681285	-5.17402	-0.783942	1.46523		107	0.414	2.931	0.821	0.14	0.09	0.13	0.19	0.36	0.35	0.49	0.56	0.7
351	TAN2206_SW-80_31-32cm	2024-05-20 11:38:26	31.8	6.26	13.1	24.5	43.9	85.2	134	161	188	223	0.00626	0.0131	0.0245	0.0439	0.0852	0.134	0.161	0.188	0.223	7.31962	6.25429	5.35107	4.50964	3.553	2.8997	2.63487	2.4112	2.16488	-2.71621	-0.679052	-5.15474	-0.781021	1.46007		107	0.254	2.921	0.768	0.14	0.09	0.13	0.19	0.36	0.35	0.49	0.56	0.7
352	Average of 'TAN2206_SW-80_31-32cm'	2024-05-20 11:34:44	31.9	6.26	13.1	24.4	43.9	85.3	135	162	189	225	0.00626	0.0131	0.0244	0.0439	0.0853	0.135	0.162	0.189	0.225	7.31962	6.25429	5.35698	4.50964	3.55131	2.88897	2.62593	2.40354	2.152	-2.73104	-0.68276	-5.16762	-0.782973	1.46573		107	0.368	2.927	0.803	0.13	0.08	0.13	0.19	0.35	0.35	0.49	0.56	0.71
[truncated: 40 more columns]

## Sheet: SW-100
Record Number	Sample Name	Measurement Date Time	Depth	MICRONS									mm									PHI									Graphical Standard Deviation						Mode	Kurtosis [3]	GSD [3]	Skew [3]	VOL% GRAINSIZE BINS
																																									<1 um	1-1.16 um	1.16-1.38 um	1.38-1.64 um	1.64-2 um	2-2.32 um	2.32-2.76 um	2.76-3.28 um	3.28-4 um
				Dx (5)	Dx (10)	Dx (16)	Dx (25)	Dx (50)	Dx (75)	Dx (84)	Dx (90)	Dx (95)	mm (5)	mm (10)	mm (16)	mm (25)	mm (50)	mm (75)	mm (84)	mm (90)	mm (95)	Φ(5)	Φ (10)	Φ (16)	Φ (25)	Φ (50)	Φ (75)	Φ (84)	Φ (90)	Φ (95)	84-16	(84-16)/4	95-5	(95-5)/6.6	σ	Sorting					0.5	1.08	1.149	1.51	1.82	2.16	2.54	3.02	3.64
1	TAN2206_SW-100_0-1cm	14/05/2024 10:04:56	0.5	2.29	3.45	4.98	7.54	16.3	29.1	36.6	44.3	55.1	0.00229	0.00345	0.00498	0.00754	0.0163	0.0291	0.0366	0.0443	0.0551	8.77044	8.17919	7.64964	7.05122	5.93898	5.10284	4.77201	4.49655	4.1818	-2.87763	-0.719407	-4.58863	-0.695247	3.57287		23	2.181	2.644	1.383	0.82	0.3	0.49	0.75	1.4	1.38	1.93	2.24	2.9
2	TAN2206_SW-100_0-1cm	14/05/2024 10:05:20	0.5	2.29	3.45	4.98	7.53	16.3	29.1	36.7	44.3	55.3	0.00229	0.00345	0.00498	0.00753	0.0163	0.0291	0.0367	0.0443	0.0553	8.77044	8.17919	7.64964	7.05313	5.93898	5.10284	4.76808	4.49655	4.17658	-2.88156	-0.720391	-4.59386	-0.696039	3.5776		22.9	2.277	2.644	1.404	0.8	0.29	0.49	0.75	1.4	1.38	1.94	2.25	2.91
3	TAN2206_SW-100_0-1cm	14/05/2024 10:05:45	0.5	2.3	3.46	4.99	7.55	16.3	29.2	36.8	44.5	55.5	0.0023	0.00346	0.00499	0.00755	0.0163	0.0292	0.0368	0.0445	0.0555	8.76415	8.17501	7.64674	7.04931	5.93898	5.09789	4.76415	4.49005	4.17137	-2.88259	-0.720649	-4.59278	-0.695876	3.57847		23	2.672	2.646	1.461	0.78	0.29	0.48	0.74	1.39	1.38	1.93	2.24	2.91
4	TAN2206_SW-100_0-1cm	14/05/2024 10:06:08	0.5	2.31	3.47	5	7.56	16.3	29.2	36.7	44.4	55.4	0.00231	0.00347	0.005	0.00756	0.0163	0.0292	0.0367	0.0444	0.0554	8.75789	8.17085	7.64386	7.0474	5.93898	5.09789	4.76808	4.4933	4.17397	-2.87578	-0.718945	-4.58392	-0.694534	3.57031		23	2.71	2.641	1.465	0.77	0.29	0.48	0.74	1.39	1.38	1.93	2.24	2.9
5	TAN2206_SW-100_0-1cm	14/05/2024 10:06:34	0.5	2.31	3.48	5.02	7.59	16.3	29.2	36.7	44.3	55.2	0.00231	0.00348	0.00502	0.00759	0.0163	0.0292	0.0367	0.0443	0.0552	8.75789	8.1667	7.6381	7.04168	5.93898	5.09789	4.76808	4.49655	4.17919	-2.87002	-0.717505	-4.5787	-0.693743	3.56376		23.1	2.27	2.636	1.398	0.77	0.29	0.48	0.74	1.39	1.37	1.92	2.23	2.89
6	TAN2206_SW-100_0-1cm	14/05/2024 10:06:57	0.5	2.32	3.49	5.03	7.61	16.4	29.2	36.9	44.7	56	0.00232	0.00349	0.00503	0.00761	0.0164	0.0292	0.0369	0.0447	0.056	8.75166	8.16256	7.63523	7.03789	5.93016	5.09789	4.76024	4.48358	4.15843	-2.87499	-0.718748	-4.59323	-0.695944	3.57093		22.9	2.853	2.644	1.498	0.76	0.29	0.48	0.74	1.39	1.37	1.92	2.22	2.88
7	TAN2206_SW-100_0-1cm	14/05/2024 10:07:22	0.5	2.32	3.49	5.04	7.62	16.4	29.3	36.9	44.6	55.8	0.00232	0.00349	0.00504	0.00762	0.0164	0.0293	0.0369	0.0446	0.0558	8.75166	8.16256	7.63236	7.03599	5.93016	5.09296	4.76024	4.48681	4.16359	-2.87213	-0.718031	-4.58807	-0.695162	3.56729		23	2.722	2.64	1.473	0.76	0.29	0.48	0.74	1.38	1.37	1.91	2.22	2.88
8	TAN2206_SW-100_0-1cm	14/05/2024 10:07:45	0.5	2.32	3.5	5.05	7.63	16.4	29.2	36.8	44.5	55.5	0.00232	0.0035	0.00505	0.00763	0.0164	0.0292	0.0368	0.0445	0.0555	8.75166	8.15843	7.6295	7.0341	5.93016	5.09789	4.76415	4.49005	4.17137	-2.86535	-0.716338	-4.58029	-0.693983	3.55933		23	2.265	2.635	1.399	0.76	0.29	0.48	0.73	1.38	1.37	1.91	2.22	2.87
9	TAN2206_SW-100_0-1cm	14/05/2024 10:08:10	0.5	2.32	3.5	5.05	7.63	16.4	29.2	36.8	44.5	55.4	0.00232	0.0035	0.00505	0.00763	0.0164	0.0292	0.0368	0.0445	0.0554	8.75166	8.15843	7.6295	7.0341	5.93016	5.09789	4.76415	4.49005	4.17397	-2.86535	-0.716338	-4.57769	-0.693589	3.55894		23	2.29	2.635	1.404	0.76	0.29	0.48	0.74	1.38	1.37	1.91	2.22	2.87
10	TAN2206_SW-100_0-1cm	14/05/2024 10:08:33	0.5	2.32	3.5	5.05	7.63	16.4	29.2	36.8	44.5	55.6	0.00232	0.0035	0.00505	0.00763	0.0164	0.0292	0.0368	0.0445	0.0556	8.75166	8.15843	7.6295	7.0341	5.93016	5.09789	4.76415	4.49005	4.16877	-2.86535	-0.716338	-4.58289	-0.694377	3.55973		23	2.734	2.638	1.469	0.76	0.29	0.47	0.73	1.38	1.37	1.91	2.21	2.87
11	Average of 'TAN2206_SW-100_0-1cm'	14/05/2024 10:04:56	0.5	2.31	3.48	5.02	7.59	16.3	29.2	36.8	44.5	55.5	0.00231	0.00348	0.00502	0.00759	0.0163	0.0292	0.0368	0.0445	0.0555	8.75789	8.1667	7.6381	7.04168	5.93898	5.09789	4.76415	4.49005	4.17137	-2.87395	-0.718487	-4.58652	-0.694928	3.56887		23	2.507	2.64	1.437	0.77	0.29	0.48	0.74	1.39	1.37	1.92	2.23	2.89
12	TAN2206_SW-100_1-2cm	14/05/2024 10:27:50	1.5	2.78	4.4	6.53	10.2	22.6	41	52.2	64.2	81.9	0.00278	0.0044	0.00653	0.0102	0.0226	0.041	0.0522	0.0642	0.0819	8.4907	7.82828	7.2587	6.61529	5.46753	4.60823	4.25981	3.96128	3.60999	-2.99889	-0.749724	-4.88071	-0.739501	3.7384		31.1	4.439	2.779	1.766	0.38	0.2	0.34	0.53	1.03	1.03	1.44	1.68	2.18
13	TAN2206_SW-100_1-2cm	14/05/2024 10:28:14	1.5	2.77	4.38	6.5	10.1	22.5	40.8	51.9	63.7	80.7	0.00277	0.00438	0.0065	0.0101	0.0225	0.0408	0.0519	0.0637	0.0807	8.4959	7.83485	7.26534	6.6295	5.47393	4.61529	4.26812	3.97256	3.63129	-2.99722	-0.749306	-4.86461	-0.737062	3.73429		31.1	3.156	2.768	1.575	0.38	0.2	0.34	0.53	1.03	1.03	1.45	1.69	2.2
14	TAN2206_SW-100_1-2cm	14/05/2024 10:28:37	1.5	2.77	4.38	6.49	10.1	22.4	40.6	51.7	63.5	80.7	0.00277	0.00438	0.00649	0.0101	0.0224	0.0406	0.0517	0.0635	0.0807	8.4959	7.83485	7.26757	6.6295	5.48036	4.62238	4.27369	3.9771	3.63129	-2.99387	-0.748468	-4.86461	-0.737062	3.73094		31	3.605	2.769	1.649	0.38	0.2	0.34	0.53	1.03	1.04	1.46	1.69	2.2
15	TAN2206_SW-100_1-2cm	14/05/2024 10:29:01	1.5	2.77	4.39	6.51	10.1	22.5	40.8	51.9	63.7	80.7	0.00277	0.00439	0.00651	0.0101	0.0225	0.0408	0.0519	0.0637	0.0807	8.4959	7.83156	7.26313	6.6295	5.47393	4.61529	4.26812	3.97256	3.63129	-2.99501	-0.748751	-4.86461	-0.737062	3.73207		31.2	3.352	2.768	1.605	0.38	0.2	0.33	0.53	1.03	1.03	1.45	1.68	2.19
16	TAN2206_SW-100_1-2cm	14/05/2024 10:29:25	1.5	2.78	4.4	6.53	10.2	22.5	40.8	52	63.9	81.4	0.00278	0.0044	0.00653	0.0102	0.0225	0.0408	0.052	0.0639	0.0814	8.4907	7.82828	7.2587	6.61529	5.47393	4.61529	4.26534	3.96804	3.61883	-2.99336	-0.748339	-4.87187	-0.738162	3.73152		30.9	3.693	2.771	1.669	0.38	0.2	0.33	0.53	1.03	1.03	1.45	1.68	2.18
17	TAN2206_SW-100_1-2cm	\	1.5	2.78	4.41	6.56	10.2	22.6	41	52.1	63.8	80.6	0.00278	0.00441	0.00656	0.0102	0.0226	0.041	0.0521	0.0638	0.0806	8.4907	7.82501	7.25209	6.61529	5.46753	4.60823	4.26257	3.9703	3.63308	-2.98952	-0.747379	-4.85762	-0.736003	3.72552		31.2	2.678	2.762	1.502	0.38	0.2	0.33	0.53	1.02	1.03	1.44	1.67	2.17
18	TAN2206_SW-100_1-2cm	14/05/2024 10:30:14	1.5	2.79	4.42	6.58	10.2	22.7	41	52.3	64.2	81.8	0.00279	0.00442	0.00658	0.0102	0.0227	0.041	0.0523	0.0642	0.0818	8.48552	7.82174	7.2477	6.61529	5.46116	4.60823	4.25705	3.96128	3.61176	-2.99065	-0.747663	-4.87376	-0.738449	3.7291		31.2	4.399	2.774	1.757	0.38	0.2	0.33	0.53	1.02	1.02	1.44	1.66	2.16
19	TAN2206_SW-100_1-2cm	14/05/2024 10:30:38	1.5	2.79	4.43	6.59	10.3	22.7	41	52.1	63.8	80.8	0.00279	0.00443	0.00659	0.0103	0.0227	0.041	0.0521	0.0638	0.0808	8.48552	7.81848	7.24551	6.60121	5.46116	4.60823	4.26257	3.9703	3.6295	-2.98293	-0.745733	-4.85602	-0.73576	3.71869		31.3	3.212	2.763	1.579	0.37	0.2	0.33	0.53	1.02	1.02	1.43	1.66	2.16
20	TAN2206_SW-100_1-2cm	14/05/2024 10:31:01	1.5	2.78	4.4	6.54	10.2	22.5	40.6	51.5	62.9	79.1	0.00278	0.0044	0.00654	0.0102	0.0225	0.0406	0.0515	0.0629	0.0791	8.4907	7.82828	7.25649	6.61529	5.47393	4.62238	4.27928	3.9908	3.66018	-2.97721	-0.744302	-4.83052	-0.731897	3.70911		31.3	2.646	2.75	1.486	0.38	0.2	0.34	0.53	1.03	1.03	1.44	1.67	2.18
21	TAN2206_SW-100_1-2cm	14/05/2024 10:31:27	1.5	2.78	4.41	6.55	10.2	22.5	40.7	51.7	63.3	80.3	0.00278	0.00441	0.00655	0.0102	0.0225	0.0407	0.0517	0.0633	0.0803	8.4907	7.82501	7.25429	6.61529	5.47393	4.61883	4.27369	3.98165	3.63846	-2.9806	-0.745149	-4.85224	-0.735188	3.71579		31.1	3.647	2.761	1.649	0.38	0.2	0.34	0.53	1.03	1.03	1.44	1.67	2.17
22	Average of 'TAN2206_SW-100_1-2cm'	14/05/2024 10:27:50	1.5	2.78	4.4	6.54	10.2	22.5	40.8	51.9	63.7	80.8	0.00278	0.0044	0.00654	0.0102	0.0225	0.0408	0.0519	0.0637	0.0808	8.4907	7.82828	7.25649	6.61529	5.47393	4.61529	4.26812	3.97256	3.6295	-2.98837	-0.747093	-4.8612	-0.736545	3.72492		31.1	3.535	2.766	1.63	0.38	0.2	0.33	0.53	1.03	1.03	1.44	1.68	2.18
23	TAN2206_SW-100_2-3cm	14/05/2024 10:42:26	2.5	2.43	3.75	5.52	8.52	19	35.9	47	59.1	78.3	0.00243	0.00375	0.00552	0.00852	0.019	0.0359	0.047	0.0591	0.0783	8.68483	8.05889	7.50112	6.87493	5.71786	4.79987	4.4112	4.0807	3.67484	-3.08992	-0.77248	-5.00998	-0.759088	3.84901		25.3	6.538	2.865	2.147	0.77	0.27	0.44	0.66	1.23	1.22	1.71	1.98	2.57
24	TAN2206_SW-100_2-3cm	14/05/2024 10:42:51	2.5	2.44	3.77	5.55	8.55	19.1	35.9	47	59.2	78.8	0.00244	0.00377	0.00555	0.00855	0.0191	0.0359	0.047	0.0592	0.0788	8.6789	8.05122	7.4933	6.86986	5.71028	4.79987	4.4112	4.07826	3.66566	-3.0821	-0.770525	-5.01324	-0.759582	3.84168		25.3	6.578	2.863	2.159	0.75	0.27	0.43	0.66	1.23	1.22	1.7	1.98	2.56
25	TAN2206_SW-100_2-3cm	14/05/2024 10:43:17	2.5	2.44	3.78	5.56	8.56	19.1	35.9	47	59.2	78.3	0.00244	0.00378	0.00556	0.00856	0.0191	0.0359	0.047	0.0592	0.0783	8.6789	8.0474	7.4907	6.86817	5.71028	4.79987	4.4112	4.07826	3.67484	-3.0795	-0.769876	-5.00406	-0.758191	3.83769		25.3	5.807	2.855	2.049	0.74	0.27	0.43	0.66	1.23	1.21	1.7	1.97	2.56
26	TAN2206_SW-100_2-3cm	14/05/2024 10:43:40	2.5	2.45	3.8	5.59	8.62	19.2	36.2	47.4	59.7	79.5	0.00245	0.0038	0.00559	0.00862	0.0192	0.0362	0.0474	0.0597	0.0795	8.673	8.03978	7.48294	6.8581	5.70275	4.78787	4.39897	4.06613	3.6529	-3.08397	-0.770992	-5.0201	-0.760621	3.84459		25.4	8.011	2.867	2.318	0.73	0.27	0.43	0.65	1.22	1.21	1.69	1.96	2.54
27	TAN2206_SW-100_2-3cm	14/05/2024 10:44:04	2.5	2.45	3.8	5.59	8.62	19.1	36.1	47.2	59.5	79.1	0.00245	0.0038	0.00559	0.00862	0.0191	0.0361	0.0472	0.0595	0.0791	8.673	8.03978	7.48294	6.8581	5.71028	4.79186	4.40507	4.07097	3.66018	-3.07787	-0.769467	-5.01282	-0.759519	3.83739		25.3	6.148	2.857	2.102	0.72	0.26	0.43	0.65	1.22	1.21	1.69	1.96	2.54
28	TAN2206_SW-100_2-3cm	14/05/2024 10:44:29	2.5	2.45	3.8	5.6	8.62	19.1	36	47.2	59.5	79	0.00245	0.0038	0.0056	0.00862	0.0191	0.036	0.0472	0.0595	0.079	8.673	8.03978	7.48036	6.8581	5.71028	4.79586	4.40507	4.07097	3.662	-3.07529	-0.768822	-5.011	-0.759242	3.83453		25.3	5.982	2.855	2.081	0.72	0.26	0.43	0.65	1.22	1.21	1.69	1.96	2.54
29	TAN2206_SW-100_2-3cm	14/05/2024 10:44:53	2.5	2.45	3.8	5.6	8.63	19.2	36	47.2	59.5	79.3	0.00245	0.0038	0.0056	0.00863	0.0192	0.036	0.0472	0.0595	0.0793	8.673	8.03978	7.48036	6.85642	5.70275	4.79586	4.40507	4.07097	3.65654	-3.07529	-0.768822	-5.01647	-0.760071	3.83536		25.3	8.461	2.863	2.375	0.72	0.26	0.43	0.65	1.22	1.2	1.68	1.95	2.53
30	TAN2206_SW-100_2-3cm	14/05/2024 10:45:16	2.5	2.46	3.81	5.62	8.67	19.2	36.2	47.4	59.8	79.1	0.00246	0.00381	0.00562	0.00867	0.0192	0.0362	0.0474	0.0598	0.0791	8.66713	8.03599	7.47521	6.84975	5.70275	4.78787	4.39897	4.06371	3.66018	-3.07625	-0.769061	-5.00695	-0.758628	3.83487		25.3	4.961	2.852	1.951	0.72	0.26	0.43	0.65	1.21	1.2	1.68	1.95	2.52
31	TAN2206_SW-100_2-3cm	14/05/2024 10:45:42	2.5	2.45	3.81	5.61	8.64	19.1	36	47	59.1	78.3	0.00245	0.00381	0.00561	0.00864	0.0191	0.036	0.047	0.0591	0.0783	8.673	8.03599	7.47778	6.85475	5.71028	4.79586	4.4112	4.0807	3.67484	-3.06659	-0.766647	-4.99816	-0.757297	3.82388		25.4	6.501	2.85	2.14	0.72	0.26	0.43	0.65	1.22	1.2	1.68	1.95	2.53
32	TAN2206_SW-100_2-3cm	14/05/2024 10:46:05	2.5	2.46	3.82	5.63	8.68	19.2	36.2	47.5	59.9	79.2	0.00246	0.00382	0.00563	0.00868	0.0192	0.0362	0.0475	0.0599	0.0792	8.66713	8.03221	7.47265	6.84809	5.70275	4.78787	4.39593	4.0613	3.65836	-3.07672	-0.76918	-5.00877	-0.758905	3.83563		25.3	4.913	2.852	1.944	0.72	0.26	0.43	0.65	1.21	1.2	1.68	1.94	2.52
33	Average of 'TAN2206_SW-100_2-3cm'	14/05/2024 10:42:26	2.5	2.45	3.79	5.59	8.61	19.1	36	47.2	59.4	78.9	0.00245	0.00379	0.00559	0.00861	0.0191	0.036	0.0472	0.0594	0.0789	8.673	8.04359	7.48294	6.85977	5.71028	4.79586	4.40507	4.07339	3.66383	-3.07787	-0.769467	-5.00917	-0.758965	3.83683		25.3	6.479	2.858	2.135	0.73	0.27	0.43	0.66	1.22	1.21	1.69	1.96	2.54
34	TAN2206_SW-100_3-4cm	14/05/2024 11:07:59	3.5	2.39	3.7	5.46	8.46	19	36.3	48.1	61.4	82.7	0.00239	0.0037	0.00546	0.00846	0.019	0.0363	0.0481	0.0614	0.0827	8.70877	8.07826	7.51688	6.88513	5.71786	4.78389	4.37782	4.02562	3.59597	-3.13906	-0.784766	-5.1128	-0.774667	3.91373		24.8	7.97	2.92	2.353	0.82	0.28	0.45	0.68	1.25	1.23	1.73	2.01	2.6
35	TAN2206_SW-100_3-4cm	14/05/2024 11:08:23	3.5	2.4	3.71	5.47	8.47	19	36.3	48	61.1	82	0.0024	0.00371	0.00547	0.00847	0.019	0.0363	0.048	0.0611	0.082	8.70275	8.07437	7.51424	6.88342	5.71786	4.78389	4.38082	4.03268	3.60823	-3.13342	-0.783355	-5.09452	-0.771897	3.90532		24.8	7.896	2.91	2.332	0.81	0.28	0.45	0.68	1.25	1.23	1.72	2.01	2.6
36	TAN2206_SW-100_3-4cm	14/05/2024 11:08:48	3.5	2.41	3.73	5.5	8.51	19.1	36.4	48.1	61.2	82	0.00241	0.00373	0.0055	0.00851	0.0191	0.0364	0.0481	0.0612	0.082	8.69675	8.06661	7.50635	6.87663	5.71028	4.77992	4.37782	4.03032	3.60823	-3.12853	-0.782133	-5.08852	-0.770988	3.89952		25	7.447	2.906	2.276	0.8	0.28	0.45	0.67	1.24	1.22	1.71	1.99	2.58
37	TAN2206_SW-100_3-4cm	14/05/2024 11:09:11	3.5	2.42	3.75	5.52	8.54	19.1	36.5	48.3	61.4	82.3	0.00242	0.00375	0.00552	0.00854	0.0191	0.0365	0.0483	0.0614	0.0823	8.69078	8.05889	7.50112	6.87155	5.71028	4.77596	4.37183	4.02562	3.60296	-3.12928	-0.782321	-5.08781	-0.770881	3.90016		24.9	7.552	2.905	2.29	0.78	0.28	0.44	0.67	1.23	1.22	1.7	1.98	2.57
38	TAN2206_SW-100_3-4cm	14/05/2024 11:09:35	3.5	2.43	3.76	5.54	8.57	19.2	36.6	48.4	61.7	82.9	0.00243	0.00376	0.00554	0.00857	0.0192	0.0366	0.0484	0.0617	0.0829	8.68483	8.05505	7.4959	6.86649	5.70275	4.77201	4.36885	4.01859	3.59248	-3.12705	-0.781762	-5.09234	-0.771567	3.89862		24.9	7.616	2.907	2.309	0.78	0.27	0.44	0.67	1.23	1.21	1.7	1.98	2.56
39	TAN2206_SW-100_3-4cm	14/05/2024 11:10:00	3.5	2.43	3.76	5.54	8.57	19.1	36.5	48.3	61.6	82.8	0.00243	0.00376	0.00554	0.00857	0.0191	0.0365	0.0483	0.0616	0.0828	8.68483	8.05505	7.4959	6.86649	5.71028	4.77596	4.37183	4.02093	3.59423	-3.12407	-0.781016	-5.0906	-0.771303	3.89537		24.9	8.105	2.908	2.368	0.78	0.27	0.44	0.67	1.23	1.21	1.7	1.97	2.56
40	TAN2206_SW-100_3-4cm	14/05/2024 11:10:26	3.5	2.42	3.75	5.54	8.57	19.1	36.4	48.1	61.3	82.2	0.00242	0.00375	0.00554	0.00857	0.0191	0.0364	0.0481	0.0613	0.0822	8.69078	8.05889	7.4959	6.86649	5.71028	4.77992	4.37782	4.02797	3.60472	-3.11808	-0.77952	-5.08606	-0.770615	3.88869		24.8	8.111	2.902	2.361	0.78	0.28	0.44	0.67	1.23	1.21	1.7	1.98	2.56
41	TAN2206_SW-100_3-4cm	14/05/2024 11:10:49	3.5	2.43	3.77	5.56	8.6	19.2	36.5	48.1	61.2	82.2	0.00243	0.00377	0.00556	0.0086	0.0192	0.0365	0.0481	0.0612	0.0822	8.68483	8.05122	7.4907	6.86145	5.70275	4.77596	4.37782	4.03032	3.60472	-3.11288	-0.77822	-5.08011	-0.769714	3.88259		25	7.887	2.899	2.334	0.78	0.27	0.44	0.66	1.23	1.21	1.69	1.97	2.55
42	TAN2206_SW-100_3-4cm	14/05/2024 11:11:13	3.5	2.43	3.77	5.57	8.61	19.2	36.6	48.5	61.8	82.6	0.00243	0.00377	0.00557	0.00861	0.0192	0.0366	0.0485	0.0618	0.0826	8.68483	8.05122	7.48811	6.85977	5.70275	4.77201	4.36587	4.01625	3.59771	-3.12224	-0.780559	-5.08711	-0.770775	3.89301		24.8	5.985	2.898	2.109	0.78	0.27	0.44	0.66	1.22	1.21	1.69	1.96	2.54
43	TAN2206_SW-100_3-4cm	14/05/2024 11:11:36	3.5	2.43	3.77	5.56	8.61	19.2	36.4	48.1	61.1	81.8	0.00243	0.00377	0.00556	0.00861	0.0192	0.0364	0.0481	0.0611	0.0818	8.68483	8.05122	7.4907	6.85977	5.70275	4.77992	4.37782	4.03268	3.61176	-3.11288	-0.77822	-5.07307	-0.768647	3.88153		25	7.491	2.894	2.278	0.78	0.27	0.44	0.66	1.23	1.21	1.69	1.97	2.55
44	Average of 'TAN2206_SW-100_3-4cm'	14/05/2024 11:07:59	3.5	2.42	3.75	5.53	8.55	19.1	36.5	48.2	61.4	82.3	0.00242	0.00375	0.00553	0.00855	0.0191	0.0365	0.0482	0.0614	0.0823	8.69078	8.05889	7.4985	6.86986	5.71028	4.77596	4.37482	4.02562	3.60296	-3.12368	-0.78092	-5.08781	-0.770881	3.89456		24.9	7.629	2.905	2.303	0.79	0.28	0.44	0.67	1.23	1.22	1.7	1.98	2.57
45	TAN2206_SW-100_4-5cm	14/05/2024 11:32:58	4.5	2.25	3.36	4.84	7.33	15.8	28	35.2	42.8	54.2	0.00225	0.00336	0.00484	0.00733	0.0158	0.028	0.0352	0.0428	0.0542	8.79586	8.21732	7.69078	7.09197	5.98393	5.15843	4.82828	4.54625	4.20556	-2.8625	-0.715624	-4.5903	-0.695499	3.558		22	30.365	2.671	4.029	0.86	0.3	0.5	0.77	1.44	1.43	2.01	2.33	3.01
46	TAN2206_SW-100_4-5cm	14/05/2024 11:33:22	4.5	2.26	3.37	4.84	7.33	15.8	27.9	35.2	42.8	54.3	0.00226	0.00337	0.00484	0.00733	0.0158	0.0279	0.0352	0.0428	0.0543	8.78946	8.21304	7.69078	7.09197	5.98393	5.16359	4.82828	4.54625	4.2029	-2.8625	-0.715624	-4.58656	-0.694933	3.55743		21.9	30.456	2.671	4.116	0.83	0.3	0.49	0.76	1.44	1.43	2.01	2.33	3.02
47	TAN2206_SW-100_4-5cm	14/05/2024 11:33:46	4.5	2.27	3.38	4.85	7.32	15.7	27.9	35.1	42.7	53.8	0.00227	0.00338	0.00485	0.00732	0.0157	0.0279	0.0351	0.0427	0.0538	8.78309	8.20876	7.6878	7.09394	5.99309	5.16359	4.83239	4.54962	4.21625	-2.85541	-0.713854	-4.56684	-0.691946	3.54736		21.9	14.432	2.648	2.72	0.82	0.3	0.49	0.76	1.44	1.43	2.01	2.33	3.02
48	TAN2206_SW-100_4-5cm	14/05/2024 11:34:10	4.5	2.27	3.39	4.86	7.34	15.8	27.9	35.1	42.6	53.7	0.00227	0.00339	0.00486	0.00734	0.0158	0.0279	0.0351	0.0426	0.0537	8.78309	8.2045	7.68483	7.09	5.98393	5.16359	4.83239	4.553	4.21893	-2.85244	-0.713111	-4.56416	-0.691539	3.54398		21.9	6.902	2.636	2.011	0.81	0.29	0.49	0.76	1.43	1.43	2	2.33	3.01
49	TAN2206_SW-100_4-5cm	14/05/2024 11:34:33	4.5	2.28	3.4	4.88	7.37	15.8	28	35.2	42.9	54.3	0.00228	0.0034	0.00488	0.00737	0.0158	0.028	0.0352	0.0429	0.0543	8.77675	8.20025	7.6789	7.08412	5.98393	5.15843	4.82828	4.54288	4.2029	-2.85062	-0.712656	-4.57385	-0.693007	3.54363		21.9	20.511	2.654	3.261	0.8	0.29	0.48	0.75	1.43	1.42	1.99	2.31	2.99
50	TAN2206_SW-100_4-5cm	14/05/2024 11:34:57	4.5	2.28	3.41	4.9	7.4	15.9	28.1	35.4	43.1	54.7	0.00228	0.00341	0.0049	0.0074	0.0159	0.0281	0.0354	0.0431	0.0547	8.77675	8.19601	7.673	7.07826	5.97483	5.15329	4.82011	4.53617	4.19232	-2.8529	-0.713224	-4.58444	-0.694611	3.54751		21.9	28.758	2.665	3.988	0.79	0.29	0.48	0.75	1.42	1.42	1.98	2.3	2.98
51	TAN2206_SW-100_4-5cm	14/05/2024 11:35:22	4.5	2.29	3.42	4.91	7.42	15.9	28.1	35.4	43.2	54.9	0.00229	0.00342	0.00491	0.00742	0.0159	0.0281	0.0354	0.0432	0.0549	8.77044	8.19179	7.67006	7.07437	5.97483	5.15329	4.82011	4.53282	4.18705	-2.84995	-0.712489	-4.58339	-0.694453	3.54441		21.9	27.773	2.665	3.918	0.79	0.29	0.48	0.75	1.42	1.41	1.98	2.3	2.97
52	TAN2206_SW-100_4-5cm	14/05/2024 11:35:48	4.5	2.29	3.42	4.91	7.42	15.9	28.1	35.3	42.9	54	0.00229	0.00342	0.00491	0.00742	0.0159	0.0281	0.0353	0.0429	0.054	8.77044	8.19179	7.67006	7.07437	5.97483	5.15329	4.82419	4.54288	4.2109	-2.84587	-0.711468	-4.55954	-0.690839	3.53671		22	14.837	2.642	2.734	0.8	0.29	0.48	0.75	1.42	1.41	1.98	2.29	2.97
53	TAN2206_SW-100_4-5cm	14/05/2024 11:36:11	4.5	2.29	3.42	4.92	7.43	15.9	28.1	35.3	42.9	54.3	0.00229	0.00342	0.00492	0.00743	0.0159	0.0281	0.0353	0.0429	0.0543	8.77044	8.19179	7.66713	7.07242	5.97483	5.15329	4.82419	4.54288	4.2029	-2.84294	-0.710734	-4.56753	-0.69205	3.53499		22	23.128	2.654	3.527	0.79	0.29	0.48	0.75	1.42	1.41	1.98	2.29	2.96
54	TAN2206_SW-100_4-5cm	14/05/2024 11:36:35	4.5	2.29	3.42	4.92	7.43	15.9	28	35.2	42.7	53.8	0.00229	0.00342	0.00492	0.00743	0.0159	0.028	0.0352	0.0427	0.0538	8.77044	8.19179	7.66713	7.07242	5.97483	5.15843	4.82828	4.54962	4.21625	-2.83885	-0.709711	-4.55419	-0.690028	3.52887		22	10.107	2.635	2.329	0.79	0.29	0.48	0.75	1.42	1.41	1.98	2.29	2.97
55	Average of 'TAN2206_SW-100_4-5cm'	14/05/2024 11:32:58	4.5	2.28	3.4	4.88	7.38	15.8	28	35.2	42.9	54.2	0.00228	0.0034	0.00488	0.00738	0.0158	0.028	0.0352	0.0429	0.0542	8.77675	8.20025	7.6789	7.08216	5.98393	5.15843	4.82828	4.54288	4.20556	-2.85062	-0.712656	-4.57119	-0.692604	3.54323		21.9	23.335	2.654	3.432	0.81	0.29	0.49	0.75	1.43	1.42	1.99	2.31	2.99
56	TAN2206_SW-100_5-6cm	14/05/2024 11:48:35	5.5	2.16	3.21	4.59	6.93	15.1	26.6	33.1	39.5	48.5	0.00216	0.00321	0.00459	0.00693	0.0151	0.0266	0.0331	0.0395	0.0485	8.85475	8.28321	7.76729	7.17293	6.04931	5.23243	4.91702	4.662	4.36587	-2.85027	-0.712566	-4.48888	-0.680134	3.5304		21.9	1.563	2.612	1.231	1.04	0.34	0.55	0.82	1.52	1.5	2.11	2.46	3.19
57	TAN2206_SW-100_5-6cm	14/05/2024 11:48:58	5.5	2.17	3.22	4.6	6.94	15.1	26.6	33.2	39.6	48.5	0.00217	0.00322	0.0046	0.00694	0.0151	0.0266	0.0332	0.0396	0.0485	8.84809	8.27872	7.76415	7.17085	6.04931	5.23243	4.91267	4.65836	4.36587	-2.85148	-0.712869	-4.48222	-0.679124	3.5306		21.9	1.566	2.608	1.233	1.02	0.34	0.54	0.82	1.51	1.49	2.1	2.46	3.19
58	TAN2206_SW-100_5-6cm	14/05/2024 11:49:24	5.5	2.18	3.23	4.62	6.96	15.1	26.6	33.2	39.6	48.5	0.00218	0.00323	0.00462	0.00696	0.0151	0.0266	0.0332	0.0396	0.0485	8.84146	8.27425	7.75789	7.1667	6.04931	5.23243	4.91267	4.65836	4.36587	-2.84522	-0.711305	-4.47558	-0.678119	3.52334		21.9	1.558	2.604	1.231	1	0.33	0.54	0.81	1.5	1.49	2.09	2.45	3.18
59	TAN2206_SW-100_5-6cm	14/05/2024 11:49:47	5.5	2.18	3.24	4.63	6.98	15.1	26.6	33.2	39.6	48.6	0.00218	0.00324	0.00463	0.00698	0.0151	0.0266	0.0332	0.0396	0.0486	8.84146	8.26979	7.75477	7.16256	6.04931	5.23243	4.91267	4.65836	4.3629	-2.8421	-0.710525	-4.47856	-0.678569	3.52067		21.9	1.558	2.602	1.23	0.99	0.33	0.54	0.81	1.5	1.48	2.09	2.44	3.17
60	TAN2206_SW-100_5-6cm	14/05/2024 11:50:13	5.5	2.19	3.25	4.64	7	15.1	26.6	33.2	39.5	48.4	0.00219	0.00325	0.00464	0.007	0.0151	0.0266	0.0332	0.0395	0.0484	8.83485	8.26534	7.75166	7.15843	6.04931	5.23243	4.91267	4.662	4.36885	-2.83899	-0.709747	-4.466	-0.676667	3.51565		22	1.314	2.596	1.186	0.98	0.33	0.53	0.81	1.49	1.48	2.08	2.43	3.16
61	TAN2206_SW-100_5-6cm	14/05/2024 11:50:36	5.5	2.19	3.26	4.66	7.03	15.2	26.7	33.3	39.6	48.6	0.00219	0.00326	0.00466	0.00703	0.0152	0.0267	0.0333	0.0396	0.0486	8.83485	8.26091	7.74545	7.15226	6.03978	5.22702	4.90833	4.65836	4.3629	-2.83712	-0.70928	-4.47195	-0.677569	3.51469		22	1.539	2.598	1.224	0.98	0.33	0.53	0.8	1.49	1.47	2.07	2.43	3.14
62	TAN2206_SW-100_5-6cm	14/05/2024 11:51:00	5.5	2.19	3.26	4.66	7.03	15.2	26.7	33.2	39.6	48.6	0.00219	0.00326	0.00466	0.00703	0.0152	0.0267	0.0332	0.0396	0.0486	8.83485	8.26091	7.74545	7.15226	6.03978	5.22702	4.91267	4.65836	4.3629	-2.83278	-0.708195	-4.47195	-0.677569	3.51035		21.9	1.551	2.597	1.227	0.98	0.33	0.53	0.8	1.49	1.47	2.07	2.42	3.14
63	TAN2206_SW-100_5-6cm	14/05/2024 11:51:24	5.5	2.19	3.26	4.66	7.04	15.2	26.7	33.3	39.6	48.7	0.00219	0.00326	0.00466	0.00704	0.0152	0.0267	0.0333	0.0396	0.0487	8.83485	8.26091	7.74545	7.15021	6.03978	5.22702	4.90833	4.65836	4.35993	-2.83712	-0.70928	-4.47492	-0.678018	3.51514		21.9	1.594	2.598	1.236	0.97	0.33	0.53	0.81	1.49	1.47	2.07	2.42	3.14
64	TAN2206_SW-100_5-6cm	14/05/2024 11:51:48	5.5	2.2	3.27	4.67	7.06	15.2	26.7	33.3	39.7	48.6	0.0022	0.00327	0.00467	0.00706	0.0152	0.0267	0.0333	0.0397	0.0486	8.82828	8.25649	7.74236	7.14612	6.03978	5.22702	4.90833	4.65472	4.3629	-2.83403	-0.708507	-4.46538	-0.676573	3.5106		22	1.518	2.596	1.218	0.97	0.33	0.53	0.8	1.48	1.47	2.07	2.41	3.13
65	TAN2206_SW-100_5-6cm	14/05/2024 11:52:11	5.5	2.2	3.27	4.68	7.06	15.2	26.7	33.3	39.7	48.6	0.0022	0.00327	0.00468	0.00706	0.0152	0.0267	0.0333	0.0397	0.0486	8.82828	8.25649	7.73928	7.14612	6.03978	5.22702	4.90833	4.65472	4.3629	-2.83094	-0.707735	-4.46538	-0.676573	3.50751		22	1.54	2.596	1.224	0.97	0.33	0.53	0.8	1.48	1.47	2.06	2.41	3.13
66	Average of 'TAN2206_SW-100_5-6cm'	14/05/2024 11:48:35	5.5	2.19	3.25	4.64	7	15.2	26.7	33.2	39.6	48.6	0.00219	0.00325	0.00464	0.007	0.0152	0.0267	0.0332	0.0396	0.0486	8.83485	8.26534	7.75166	7.15843	6.03978	5.22702	4.91267	4.65836	4.3629	-2.83899	-0.709747	-4.47195	-0.677569	3.51656		21.9	1.531	2.601	1.224	0.99	0.33	0.54	0.81	1.5	1.48	2.08	2.43	3.16
67	TAN2206_SW-100_6-7cm	14/05/2024 12:03:11	6.5	2.29	3.48	5.06	7.79	17.5	31.5	39.7	48.2	60	0.00229	0.00348	0.00506	0.00779	0.0175	0.0315	0.0397	0.0482	0.06	8.77044	8.1667	7.62665	7.00416	5.8365	4.9885	4.65472	4.37482	4.05889	-2.97193	-0.742982	-4.71154	-0.71387	3.6858		25.3	3.007	2.729	1.508	0.91	0.3	0.49	0.73	1.35	1.33	1.88	2.2	2.85
68	TAN2206_SW-100_6-7cm	14/05/2024 12:03:35	6.5	2.3	3.5	5.07	7.8	17.5	31.6	39.9	48.3	60.1	0.0023	0.0035	0.00507	0.0078	0.0175	0.0316	0.0399	0.0483	0.0601	8.76415	8.15843	7.6238	7.00231	5.8365	4.98393	4.64747	4.37183	4.05649	-2.97633	-0.744083	-4.70766	-0.713282	3.68961		25.4	2.372	2.725	1.416	0.89	0.3	0.48	0.73	1.34	1.33	1.87	2.19	2.85
69	TAN2206_SW-100_6-7cm	14/05/2024 12:03:59	6.5	2.31	3.51	5.09	7.81	17.5	31.6	39.8	48.2	59.9	0.00231	0.00351	0.00509	0.00781	0.0175	0.0316	0.0398	0.0482	0.0599	8.75789	8.15431	7.61812	7.00046	5.8365	4.98393	4.65109	4.37482	4.0613	-2.96703	-0.741758	-4.69659	-0.711605	3.67864		25.4	2.423	2.72	1.423	0.87	0.3	0.48	0.72	1.34	1.33	1.87	2.19	2.84
70	TAN2206_SW-100_6-7cm	14/05/2024 12:04:22	6.5	2.32	3.52	5.11	7.84	17.6	31.7	39.9	48.4	60.3	0.00232	0.00352	0.00511	0.00784	0.0176	0.0317	0.0399	0.0484	0.0603	8.75166	8.15021	7.61246	6.99493	5.82828	4.97937	4.64747	4.36885	4.0517	-2.96499	-0.741248	-4.69996	-0.712115	3.67711		25.4	2.437	2.72	1.428	0.87	0.3	0.48	0.72	1.33	1.32	1.86	2.18	2.83
71	TAN2206_SW-100_6-7cm	14/05/2024 12:04:46	6.5	2.32	3.53	5.12	7.86	17.6	31.6	39.9	48.3	60.1	0.00232	0.00353	0.00512	0.00786	0.0176	0.0316	0.0399	0.0483	0.0601	8.75166	8.14612	7.60964	6.99125	5.82828	4.98393	4.64747	4.37183	4.05649	-2.96217	-0.740543	-4.69517	-0.711389	3.67356		25.4	2.436	2.716	1.426	0.86	0.3	0.48	0.72	1.33	1.32	1.85	2.17	2.83
72	TAN2206_SW-100_6-7cm	14/05/2024 12:05:09	6.5	2.32	3.53	5.13	7.87	17.6	31.7	39.9	48.3	60	0.00232	0.00353	0.00513	0.00787	0.0176	0.0317	0.0399	0.0483	0.06	8.75166	8.14612	7.60683	6.98942	5.82828	4.97937	4.64747	4.37183	4.05889	-2.95936	-0.73984	-4.69277	-0.711025	3.67038		25.4	2.348	2.714	1.409	0.86	0.3	0.48	0.72	1.33	1.31	1.85	2.17	2.82
73	TAN2206_SW-100_6-7cm	14/05/2024 12:05:33	6.5	2.33	3.54	5.14	7.9	17.6	31.7	40	48.5	60.3	0.00233	0.00354	0.00514	0.0079	0.0176	0.0317	0.04	0.0485	0.0603	8.74545	8.14203	7.60402	6.98393	5.82828	4.97937	4.64386	4.36587	4.0517	-2.96016	-0.74004	-4.69376	-0.711175	3.67133		25.4	2.406	2.715	1.42	0.85	0.3	0.48	0.72	1.32	1.31	1.84	2.16	2.81
74	TAN2206_SW-100_6-7cm	14/05/2024 12:05:58	6.5	2.33	3.55	5.16	7.92	17.7	31.8	40	48.4	60.2	0.00233	0.00355	0.00516	0.00792	0.0177	0.0318	0.04	0.0484	0.0602	8.74545	8.13797	7.59841	6.98028	5.82011	4.97483	4.64386	4.36885	4.05409	-2.95456	-0.738639	-4.69136	-0.710812	3.66537		25.4	2.334	2.713	1.406	0.86	0.29	0.47	0.71	1.32	1.31	1.84	2.15	2.8
75	TAN2206_SW-100_6-7cm	14/05/2024 12:06:22	6.5	2.33	3.54	5.14	7.89	17.6	31.6	39.8	48.3	60	0.00233	0.00354	0.00514	0.00789	0.0176	0.0316	0.0398	0.0483	0.06	8.74545	8.14203	7.60402	6.98576	5.82828	4.98393	4.65109	4.37183	4.05889	-2.95293	-0.738232	-4.68656	-0.710085	3.66301		25.3	2.357	2.711	1.41	0.85	0.3	0.48	0.72	1.32	1.31	1.84	2.16	2.81
76	TAN2206_SW-100_6-7cm	14/05/2024 12:06:47	6.5	2.33	3.55	5.16	7.92	17.7	31.7	40	48.4	60.1	0.00233	0.00355	0.00516	0.00792	0.0177	0.0317	0.04	0.0484	0.0601	8.74545	8.13797	7.59841	6.98028	5.82011	4.97937	4.64386	4.36885	4.05649	-2.95456	-0.738639	-4.68896	-0.710449	3.66501		25.5	2.373	2.713	1.412	0.86	0.3	0.47	0.71	1.32	1.31	1.84	2.15	2.8
77	Average of 'TAN2206_SW-100_6-7cm'	14/05/2024 12:03:11	6.5	2.32	3.52	5.12	7.86	17.6	31.7	39.9	48.3	60.1	0.00232	0.00352	0.00512	0.00786	0.0176	0.0317	0.0399	0.0483	0.0601	8.75166	8.15021	7.60964	6.99125	5.82828	4.97937	4.64747	4.37183	4.05649	-2.96217	-0.740543	-4.69517	-0.711389	3.67356		25.4	2.452	2.718	1.426	0.87	0.3	0.48	0.72	1.33	1.32	1.85	2.17	2.82
78	TAN2206_SW-100_7-8cm	14/05/2024 12:16:57	7.5	2.34	3.55	5.15	7.89	17.7	32	40.2	48.5	59.7	0.00234	0.00355	0.00515	0.00789	0.0177	0.032	0.0402	0.0485	0.0597	8.73928	8.13797	7.60121	6.98576	5.82011	4.96578	4.63666	4.36587	4.06613	-2.96455	-0.741138	-4.67315	-0.708053	3.6726		26.1	1.668	2.71	1.282	0.84	0.29	0.47	0.71	1.32	1.31	1.85	2.17	2.82
79	TAN2206_SW-100_7-8cm	14/05/2024 12:17:22	7.5	2.35	3.56	5.16	7.9	17.7	32	40.2	48.5	59.8	0.00235	0.00356	0.00516	0.0079	0.0177	0.032	0.0402	0.0485	0.0598	8.73312	8.13391	7.59841	6.98393	5.82011	4.96578	4.63666	4.36587	4.06371	-2.96175	-0.740438	-4.66941	-0.707487	3.66924		26.1	1.65	2.706	1.28	0.82	0.29	0.46	0.7	1.31	1.31	1.84	2.16	2.82
80	TAN2206_SW-100_7-8cm	14/05/2024 12:17:46	7.5	2.36	3.58	5.19	7.94	17.8	32.2	40.4	48.7	60.1	0.00236	0.00358	0.00519	0.00794	0.0178	0.0322	0.0404	0.0487	0.0601	8.727	8.12582	7.59005	6.97665	5.81198	4.9568	4.6295	4.35993	4.05649	-2.96055	-0.740137	-4.67051	-0.707652	3.6682		26.2	1.648	2.705	1.279	0.79	0.28	0.46	0.7	1.31	1.3	1.83	2.15	2.8
81	TAN2206_SW-100_7-8cm	14/05/2024 12:18:11	7.5	2.36	3.59	5.2	7.96	17.8	32.2	40.4	48.7	59.9	0.00236	0.00359	0.0052	0.00796	0.0178	0.0322	0.0404	0.0487	0.0599	8.727	8.1218	7.58727	6.97302	5.81198	4.9568	4.6295	4.35993	4.0613	-2.95777	-0.739443	-4.6657	-0.706924	3.6647		26.3	1.614	2.702	1.269	0.8	0.28	0.46	0.7	1.3	1.3	1.83	2.14	2.79
82	TAN2206_SW-100_7-8cm	14/05/2024 12:18:35	7.5	2.37	3.59	5.22	7.98	17.9	32.2	40.5	48.8	60.2	0.00237	0.00359	0.00522	0.00798	0.0179	0.0322	0.0405	0.0488	0.0602	8.7209	8.1218	7.58173	6.9694	5.8039	4.9568	4.62593	4.35698	4.05409	-2.9558	-0.73895	-4.6668	-0.707092	3.66289		26.2	1.937	2.704	1.325	0.79	0.28	0.46	0.69	1.3	1.29	1.82	2.13	2.78
83	TAN2206_SW-100_7-8cm	14/05/2024 12:19:00	7.5	2.37	3.6	5.22	7.99	17.9	32.2	40.4	48.7	59.9	0.00237	0.0036	0.00522	0.00799	0.0179	0.0322	0.0404	0.0487	0.0599	8.7209	8.11779	7.58173	6.96759	5.8039	4.9568	4.6295	4.35993	4.0613	-2.95223	-0.738058	-4.6596	-0.706	3.65823		26.2	1.639	2.698	1.275	0.79	0.28	0.46	0.69	1.3	1.29	1.82	2.13	2.78
84	TAN2206_SW-100_7-8cm	14/05/2024 12:19:26	7.5	2.37	3.6	5.23	8	17.9	32.2	40.4	48.7	59.9	0.00237	0.0036	0.00523	0.008	0.0179	0.0322	0.0404	0.0487	0.0599	8.7209	8.11779	7.57897	6.96578	5.8039	4.9568	4.6295	4.35993	4.0613	-2.94947	-0.737368	-4.6596	-0.706	3.65547		26.3	1.61	2.698	1.268	0.79	0.28	0.46	0.69	1.3	1.29	1.82	2.13	2.77
85	TAN2206_SW-100_7-8cm	14/05/2024 12:19:49	7.5	2.37	3.61	5.24	8.02	17.9	32.2	40.4	48.7	60	0.00237	0.00361	0.00524	0.00802	0.0179	0.0322	0.0404	0.0487	0.06	8.7209	8.11379	7.57622	6.96218	5.8039	4.9568	4.6295	4.35993	4.05889	-2.94672	-0.736679	-4.662	-0.706364	3.65308		26.2	1.632	2.698	1.273	0.79	0.28	0.46	0.69	1.29	1.29	1.81	2.12	2.76
86	TAN2206_SW-100_7-8cm	14/05/2024 12:20:14	7.5	2.38	3.62	5.26	8.06	18	32.4	40.7	49.1	60.6	0.00238	0.00362	0.00526	0.00806	0.018	0.0324	0.0407	0.0491	0.0606	8.71482	8.10979	7.57072	6.955	5.79586	4.94786	4.61883	4.34813	4.04454	-2.95189	-0.737974	-4.67028	-0.707619	3.65951		26.2	1.996	2.704	1.337	0.79	0.28	0.45	0.69	1.29	1.28	1.8	2.11	2.75
87	TAN2206_SW-100_7-8cm	14/05/2024 12:20:37	7.5	2.37	3.62	5.26	8.06	18	32.3	40.6	49	60.5	0.00237	0.00362	0.00526	0.00806	0.018	0.0323	0.0406	0.049	0.0605	8.7209	8.10979	7.57072	6.955	5.79586	4.95232	4.62238	4.35107	4.04692	-2.94835	-0.737086	-4.67398	-0.708178	3.65652		26.2	1.945	2.701	1.326	0.79	0.28	0.46	0.69	1.29	1.28	1.8	2.11	2.75
88	Average of 'TAN2206_SW-100_7-8cm'	14/05/2024 12:16:57	7.5	2.36	3.59	5.21	7.98	17.9	32.2	40.4	48.7	60	0.00236	0.00359	0.00521	0.00798	0.0179	0.0322	0.0404	0.0487	0.06	8.727	8.1218	7.5845	6.9694	5.8039	4.9568	4.6295	4.35993	4.05889	-2.955	-0.73875	-4.6681	-0.707288	3.66229		26.2	1.739	2.703	1.292	0.8	0.28	0.46	0.7	1.3	1.29	1.82	2.14	2.78
89	TAN2206_SW-100_8-9cm	14/05/2024 12:31:29	8.5	2.36	3.57	5.16	7.88	17.4	31.2	39.3	47.3	58.4	0.00236	0.00357	0.00516	0.00788	0.0174	0.0312	0.0393	0.0473	0.0584	8.727	8.12986	7.59841	6.98759	5.84477	5.00231	4.66933	4.40202	4.09789	-2.92909	-0.732272	-4.62911	-0.70138	3.63047		25.2	1.818	2.676	1.309	0.76	0.28	0.45	0.7	1.32	1.32	1.86	2.17	2.82
90	TAN2206_SW-100_8-9cm	14/05/2024 12:31:53	8.5	2.36	3.56	5.14	7.81	17.3	31	39	46.9	57.9	0.00236	0.00356	0.00514	0.00781	0.0173	0.031	0.039	0.0469	0.0579	8.727	8.13391	7.60402	7.00046	5.85308	5.01159	4.68038	4.41427	4.11029	-2.92363	-0.730908	-4.6167	-0.699501	3.62313		25.1	1.792	2.67	1.303	0.75	0.28	0.45	0.7	1.33	1.33	1.87	2.19	2.85
91	TAN2206_SW-100_8-9cm	14/05/2024 12:32:18	8.5	2.37	3.57	5.15	7.83	17.3	31	39	47	57.9	0.00237	0.00357	0.00515	0.00783	0.0173	0.031	0.039	0.047	0.0579	8.7209	8.12986	7.60121	6.99677	5.85308	5.01159	4.68038	4.4112	4.11029	-2.92083	-0.730207	-4.6106	-0.698576	3.61941		25.1	1.793	2.668	1.304	0.74	0.27	0.45	0.7	1.32	1.32	1.86	2.18	2.84
92	TAN2206_SW-100_8-9cm	14/05/2024 12:32:42	8.5	2.39	3.6	5.19	7.88	17.4	31.1	39	47	57.9	0.00239	0.0036	0.00519	0.00788	0.0174	0.0311	0.039	0.047	0.0579	8.70877	8.11779	7.59005	6.98759	5.84477	5.00694	4.68038	4.4112	4.11029	-2.90967	-0.727417	-4.59848	-0.69674	3.60641		25.2	1.77	2.655	1.297	0.66	0.27	0.45	0.69	1.32	1.32	1.86	2.17	2.83
93	TAN2206_SW-100_8-9cm	14/05/2024 12:33:05	8.5	2.4	3.61	5.21	7.91	17.4	31.2	39.2	47.1	58.1	0.0024	0.00361	0.00521	0.00791	0.0174	0.0312	0.0392	0.0471	0.0581	8.70275	8.11379	7.5845	6.98211	5.84477	5.00231	4.673	4.40813	4.10532	-2.9115	-0.727875	-4.59743	-0.696581	3.60808		25.3	1.748	2.656	1.292	0.67	0.27	0.44	0.69	1.31	1.31	1.85	2.16	2.82
94	TAN2206_SW-100_8-9cm	14/05/2024 12:33:31	8.5	2.4	3.61	5.22	7.93	17.4	31.2	39.2	47.3	58.3	0.0024	0.00361	0.00522	0.00793	0.0174	0.0312	0.0392	0.0473	0.0583	8.70275	8.11379	7.58173	6.97846	5.84477	5.00231	4.673	4.40202	4.10036	-2.90873	-0.727183	-4.60239	-0.697332	3.60606		25.1	1.798	2.658	1.306	0.67	0.27	0.44	0.69	1.31	1.31	1.84	2.16	2.81
95	TAN2206_SW-100_8-9cm	14/05/2024 12:33:56	8.5	2.4	3.62	5.23	7.94	17.5	31.2	39.2	47.1	58.1	0.0024	0.00362	0.00523	0.00794	0.0175	0.0312	0.0392	0.0471	0.0581	8.70275	8.10979	7.57897	6.97665	5.8365	5.00231	4.673	4.40813	4.10532	-2.90597	-0.726493	-4.59743	-0.696581	3.60255		25.2	1.775	2.654	1.297	0.66	0.27	0.44	0.69	1.31	1.31	1.84	2.15	2.8
96	TAN2206_SW-100_8-9cm	14/05/2024 12:34:20	8.5	2.4	3.62	5.24	7.96	17.5	31.2	39.2	47.2	58.2	0.0024	0.00362	0.00524	0.00796	0.0175	0.0312	0.0392	0.0472	0.0582	8.70275	8.10979	7.57622	6.97302	5.8365	5.00231	4.673	4.40507	4.10284	-2.90321	-0.725804	-4.59991	-0.696956	3.60017		25.2	1.788	2.654	1.3	0.66	0.27	0.44	0.69	1.3	1.3	1.84	2.15	2.79
97	TAN2206_SW-100_8-9cm	14/05/2024 12:34:43	8.5	2.4	3.62	5.23	7.95	17.5	31.2	39.2	47.2	58.2	0.0024	0.00362	0.00523	0.00795	0.0175	0.0312	0.0392	0.0472	0.0582	8.70275	8.10979	7.57897	6.97483	5.8365	5.00231	4.673	4.40507	4.10284	-2.90597	-0.726493	-4.59991	-0.696956	3.60293		25.2	1.788	2.655	1.301	0.67	0.27	0.44	0.69	1.31	1.31	1.84	2.15	2.79
98	TAN2206_SW-100_8-9cm	14/05/2024 12:35:09	8.5	2.41	3.63	5.25	7.99	17.5	31.3	39.3	47.3	58.2	0.00241	0.00363	0.00525	0.00799	0.0175	0.0313	0.0393	0.0473	0.0582	8.69675	8.10581	7.57347	6.96759	5.8365	4.99769	4.66933	4.40202	4.10284	-2.90414	-0.726035	-4.59391	-0.696048	3.60019		25.3	1.76	2.654	1.294	0.66	0.27	0.44	0.68	1.3	1.3	1.83	2.14	2.78
99	Average of 'TAN2206_SW-100_8-9cm'	14/05/2024 12:31:29	8.5	2.39	3.6	5.2	7.91	17.4	31.2	39.2	47.1	58.1	0.00239	0.0036	0.0052	0.00791	0.0174	0.0312	0.0392	0.0471	0.0581	8.70877	8.11779	7.58727	6.98211	5.84477	5.00231	4.673	4.40813	4.10532	-2.91427	-0.728568	-4.60346	-0.697493	3.61176		25.2	1.783	2.66	1.3	0.69	0.27	0.45	0.69	1.31	1.31	1.85	2.16	2.81
100	TAN2206_SW-100_9-10cm	14/05/2024 13:17:40	9.5	2.37	3.61	5.27	8.12	18.2	33	41.7	50.6	63.6	0.00237	0.00361	0.00527	0.00812	0.0182	0.033	0.0417	0.0506	0.0636	8.7209	8.11379	7.56798	6.9443	5.77992	4.92139	4.58381	4.30472	3.97483	-2.98417	-0.746043	-4.74607	-0.719101	3.70327		26.2	40.34	2.768	4.624	0.83	0.28	0.45	0.69	1.28	1.28	1.8	2.11	2.74
101	TAN2206_SW-100_9-10cm	14/05/2024 13:18:04	9.5	2.38	3.63	5.29	8.14	18.3	33.1	41.9	50.9	64.2	0.00238	0.00363	0.00529	0.00814	0.0183	0.0331	0.0419	0.0509	0.0642	8.71482	8.10581	7.56252	6.94076	5.77201	4.91702	4.57691	4.29619	3.96128	-2.98561	-0.746403	-4.75354	-0.720233	3.70584		26.3	27.884	2.768	3.78	0.81	0.28	0.45	0.68	1.27	1.27	1.79	2.1	2.73
102	TAN2206_SW-100_9-10cm	14/05/2024 13:18:27	9.5	2.39	3.64	5.3	8.16	18.3	33.1	41.9	50.7	63.8	0.00239	0.00364	0.0053	0.00816	0.0183	0.0331	0.0419	0.0507	0.0638	8.70877	8.10185	7.55979	6.93722	5.77201	4.91702	4.57691	4.30187	3.9703	-2.98289	-0.745721	-4.73847	-0.717951	3.70084		26.4	39.345	2.762	4.5	0.8	0.28	0.45	0.68	1.27	1.27	1.78	2.09	2.73
103	TAN2206_SW-100_9-10cm	14/05/2024 13:18:51	9.5	2.39	3.64	5.3	8.14	18.2	32.9	41.5	50.1	62.4	0.00239	0.00364	0.0053	0.00814	0.0182	0.0329	0.0415	0.0501	0.0624	8.70877	8.10185	7.55979	6.94076	5.77992	4.92577	4.59074	4.31905	4.00231	-2.96905	-0.742262	-4.70646	-0.713101	3.68215		26.4	2.155	2.721	1.376	0.8	0.28	0.45	0.68	1.27	1.27	1.79	2.09	2.73
104	TAN2206_SW-100_9-10cm	14/05/2024 13:19:14	9.5	2.39	3.65	5.33	8.19	18.3	33.1	41.7	50.4	63	0.00239	0.00365	0.00533	0.00819	0.0183	0.0331	0.0417	0.0504	0.063	8.70877	8.09789	7.55165	6.93192	5.77201	4.91702	4.58381	4.31043	3.9885	-2.96784	-0.74196	-4.72027	-0.715192	3.68303		26.4	2.757	2.726	1.471	0.79	0.28	0.45	0.68	1.26	1.26	1.77	2.08	2.71
105	TAN2206_SW-100_9-10cm	14/05/2024 13:19:38	9.5	2.4	3.66	5.34	8.21	18.4	33.2	41.9	50.8	63.8	0.0024	0.00366	0.00534	0.00821	0.0184	0.0332	0.0419	0.0508	0.0638	8.70275	8.09394	7.54894	6.9284	5.76415	4.91267	4.57691	4.29903	3.9703	-2.97204	-0.74301	-4.73245	-0.717038	3.68908		26.4	39.365	2.758	4.539	0.79	0.28	0.44	0.67	1.26	1.25	1.77	2.07	2.7
106	TAN2206_SW-100_9-10cm	14/05/2024 13:20:02	9.5	2.39	3.65	5.32	8.18	18.3	32.9	41.5	50.2	62.5	0.00239	0.00365	0.00532	0.00818	0.0183	0.0329	0.0415	0.0502	0.0625	8.70877	8.09789	7.55436	6.93368	5.77201	4.92577	4.59074	4.31617	4	-2.96361	-0.740903	-4.70877	-0.713451	3.67706		26.3	2.636	2.72	1.448	0.79	0.28	0.45	0.68	1.27	1.26	1.78	2.08	2.71
107	TAN2206_SW-100_9-10cm	14/05/2024 13:20:27	9.5	2.4	3.67	5.36	8.24	18.4	33.2	42	50.9	63.8	0.0024	0.00367	0.00536	0.00824	0.0184	0.0332	0.042	0.0509	0.0638	8.70275	8.09	7.54355	6.92314	5.76415	4.91267	4.57347	4.29619	3.9703	-2.97008	-0.742521	-4.73245	-0.717038	3.68712		26.4	30.353	2.75	3.844	0.78	0.28	0.44	0.67	1.26	1.25	1.76	2.07	2.69
108	TAN2206_SW-100_9-10cm	14/05/2024 13:20:53	9.5	2.4	3.66	5.34	8.21	18.3	33	41.5	50.2	62.4	0.0024	0.00366	0.00534	0.00821	0.0183	0.033	0.0415	0.0502	0.0624	8.70275	8.09394	7.54894	6.9284	5.77201	4.92139	4.59074	4.31617	4.00231	-2.9582	-0.73955	-4.70044	-0.712188	3.67039		26.4	2.155	2.716	1.374	0.79	0.28	0.44	0.67	1.26	1.26	1.77	2.07	2.7
109	TAN2206_SW-100_9-10cm	14/05/2024 13:21:17	9.5	2.41	3.68	5.37	8.27	18.5	33.3	42	50.9	63.8	0.00241	0.00368	0.00537	0.00827	0.0185	0.0333	0.042	0.0509	0.0638	8.69675	8.08608	7.54086	6.9179	5.75633	4.90833	4.57347	4.29619	3.9703	-2.9674	-0.741849	-4.72645	-0.716129	3.68352		26.5	31.305	2.75	3.949	0.78	0.28	0.44	0.67	1.25	1.25	1.76	2.06	2.68
110	Average of 'TAN2206_SW-100_9-10cm'	14/05/2024 13:17:40	9.5	2.39	3.65	5.32	8.19	18.3	33.1	41.8	50.6	63.3	0.00239	0.00365	0.00532	0.00819	0.0183	0.0331	0.0418	0.0506	0.0633	8.70877	8.09789	7.55436	6.93192	5.77201	4.91702	4.58035	4.30472	3.98165	-2.974	-0.743501	-4.72712	-0.716231	3.69024		26.4	29.733	2.744	3.586	0.8	0.28	0.45	0.68	1.27	1.26	1.78	2.08	2.71
111	TAN2206_SW-100_10-11cm	14/05/2024 13:31:30	10.5	2.35	3.59	5.22	8.03	18.2	33.3	42	50.7	63	0.00235	0.00359	0.00522	0.00803	0.0182	0.0333	0.042	0.0507	0.063	8.73312	8.1218	7.58173	6.96038	5.77992	4.90833	4.57347	4.30187	3.9885	-3.00827	-0.752067	-4.74462	-0.718882	3.72715		27	1.91	2.747	1.333	0.85	0.29	0.46	0.7	1.29	1.28	1.81	2.13	2.77
112	TAN2206_SW-100_10-11cm	14/05/2024 13:31:53	10.5	2.36	3.59	5.22	8.02	18.2	33.2	41.9	50.6	62.8	0.00236	0.00359	0.00522	0.00802	0.0182	0.0332	0.0419	0.0506	0.0628	8.727	8.1218	7.58173	6.96218	5.77992	4.91267	4.57691	4.30472	3.99309	-3.00483	-0.751207	-4.73391	-0.717258	3.72209		27	1.892	2.742	1.33	0.83	0.28	0.46	0.69	1.29	1.28	1.81	2.13	2.78
113	TAN2206_SW-100_10-11cm	14/05/2024 13:32:17	10.5	2.38	3.62	5.26	8.08	18.3	33.4	42.2	50.9	63.2	0.00238	0.00362	0.00526	0.00808	0.0183	0.0334	0.0422	0.0509	0.0632	8.71482	8.10979	7.57072	6.95143	5.77201	4.90401	4.56661	4.29619	3.98393	-3.00411	-0.751027	-4.73089	-0.716802	3.72091		27.1	1.886	2.741	1.329	0.81	0.28	0.45	0.69	1.28	1.27	1.8	2.11	2.76
114	TAN2206_SW-100_10-11cm	14/05/2024 13:32:41	10.5	2.38	3.62	5.26	8.08	18.3	33.3	42.1	50.8	63.1	0.00238	0.00362	0.00526	0.00808	0.0183	0.0333	0.0421	0.0508	0.0631	8.71482	8.10979	7.57072	6.95143	5.77201	4.90833	4.57004	4.29903	3.98622	-3.00069	-0.750171	-4.72861	-0.716456	3.71714		27	1.915	2.738	1.335	0.8	0.28	0.45	0.69	1.28	1.27	1.8	2.11	2.75
115	TAN2206_SW-100_10-11cm	14/05/2024 13:33:04	10.5	2.38	3.63	5.28	8.11	18.3	33.4	42.1	50.8	63	0.00238	0.00363	0.00528	0.00811	0.0183	0.0334	0.0421	0.0508	0.063	8.71482	8.10581	7.56525	6.94608	5.77201	4.90401	4.57004	4.29903	3.9885	-2.99521	-0.748803	-4.72632	-0.716109	3.71132		27.1	1.862	2.734	1.322	0.79	0.28	0.45	0.68	1.27	1.27	1.79	2.1	2.74
116	TAN2206_SW-100_10-11cm	14/05/2024 13:33:28	10.5	2.39	3.64	5.3	8.14	18.4	33.5	42.3	51	63.2	0.00239	0.00364	0.0053	0.00814	0.0184	0.0335	0.0423	0.051	0.0632	8.70877	8.10185	7.55979	6.94076	5.76415	4.8997	4.5632	4.29336	3.98393	-2.99659	-0.749148	-4.72484	-0.715885	3.71248		27.1	1.873	2.735	1.325	0.79	0.28	0.45	0.68	1.27	1.26	1.78	2.09	2.73
117	TAN2206_SW-100_10-11cm	14/05/2024 13:33:51	10.5	2.39	3.65	5.3	8.15	18.4	33.5	42.2	50.9	63.1	0.00239	0.00365	0.0053	0.00815	0.0184	0.0335	0.0422	0.0509	0.0631	8.70877	8.09789	7.55979	6.93898	5.76415	4.8997	4.56661	4.29619	3.98622	-2.99318	-0.748295	-4.72256	-0.715539	3.70872		27.2	1.857	2.732	1.32	0.79	0.28	0.45	0.68	1.27	1.26	1.78	2.09	2.73
118	TAN2206_SW-100_10-11cm	14/05/2024 13:34:16	10.5	2.39	3.65	5.31	8.16	18.4	33.5	42.2	50.9	63.2	0.00239	0.00365	0.00531	0.00816	0.0184	0.0335	0.0422	0.0509	0.0632	8.70877	8.09789	7.55707	6.93722	5.76415	4.8997	4.56661	4.29619	3.98393	-2.99046	-0.747615	-4.72484	-0.715885	3.70634		27.1	1.925	2.734	1.335	0.79	0.28	0.45	0.68	1.27	1.26	1.78	2.09	2.73
119	TAN2206_SW-100_10-11cm	14/05/2024 13:34:39	10.5	2.4	3.66	5.33	8.19	18.5	33.6	42.4	51.1	63.4	0.0024	0.00366	0.00533	0.00819	0.0185	0.0336	0.0424	0.0511	0.0634	8.70275	8.09394	7.55165	6.93192	5.75633	4.89539	4.55979	4.29053	3.97937	-2.99186	-0.747964	-4.72338	-0.715663	3.70752		27.2	1.913	2.734	1.333	0.79	0.28	0.45	0.68	1.26	1.25	1.77	2.08	2.71
120	TAN2206_SW-100_10-11cm	14/05/2024 13:35:05	10.5	2.39	3.65	5.32	8.17	18.4	33.4	42.2	50.9	63.1	0.00239	0.00365	0.00532	0.00817	0.0184	0.0334	0.0422	0.0509	0.0631	8.70877	8.09789	7.55436	6.93545	5.76415	4.90401	4.56661	4.29619	3.98622	-2.98774	-0.746936	-4.72256	-0.715539	3.70328		27	1.866	2.73	1.322	0.79	0.28	0.45	0.68	1.27	1.26	1.77	2.08	2.72
121	Average of 'TAN2206_SW-100_10-11cm'	14/05/2024 13:31:30	10.5	2.38	3.63	5.28	8.11	18.3	33.4	42.2	50.9	63.1	0.00238	0.00363	0.00528	0.00811	0.0183	0.0334	0.0422	0.0509	0.0631	8.71482	8.10581	7.56525	6.94608	5.77201	4.90401	4.56661	4.29619	3.98622	-2.99863	-0.749658	-4.72861	-0.716456	3.71509		27.1	1.89	2.737	1.329	0.8	0.28	0.45	0.68	1.27	1.27	1.79	2.1	2.74
122	TAN2206_SW-100_11-12cm	14/05/2024 13:45:28	11.5	2.34	3.58	5.24	8.13	18.6	33.9	42.8	51.6	64.1	0.00234	0.00358	0.00524	0.00813	0.0186	0.0339	0.0428	0.0516	0.0641	8.73928	8.12582	7.57622	6.94253	5.74855	4.88257	4.54625	4.27649	3.96353	-3.02997	-0.757493	-4.77574	-0.723598	3.75357		27.6	1.897	2.769	1.33	0.89	0.3	0.47	0.7	1.29	1.28	1.8	2.11	2.74
123	TAN2206_SW-100_11-12cm	14/05/2024 13:45:54	11.5	2.35	3.61	5.27	8.17	18.7	34	43	51.8	64.3	0.00235	0.00361	0.00527	0.00817	0.0187	0.034	0.043	0.0518	0.0643	8.73312	8.11379	7.56798	6.93545	5.74082	4.87832	4.53952	4.2709	3.95904	-3.02846	-0.757115	-4.77409	-0.723346	3.75181		27.7	1.876	2.765	1.326	0.86	0.29	0.46	0.7	1.28	1.27	1.79	2.1	2.72
124	TAN2206_SW-100_11-12cm	14/05/2024 13:46:17	11.5	2.36	3.61	5.28	8.17	18.7	34	42.9	51.7	64.2	0.00236	0.00361	0.00528	0.00817	0.0187	0.034	0.0429	0.0517	0.0642	8.727	8.11379	7.56525	6.93545	5.74082	4.87832	4.54288	4.27369	3.96128	-3.02237	-0.755592	-4.76571	-0.722078	3.74445		27.6	1.901	2.762	1.331	0.86	0.29	0.46	0.69	1.28	1.27	1.79	2.09	2.72
125	TAN2206_SW-100_11-12cm	14/05/2024 13:46:41	11.5	2.37	3.64	5.32	8.23	18.8	34.1	43.1	51.8	64.2	0.00237	0.00364	0.00532	0.00823	0.0188	0.0341	0.0431	0.0518	0.0642	8.7209	8.10185	7.55436	6.92489	5.73312	4.87408	4.53617	4.2709	3.96128	-3.01819	-0.754547	-4.75961	-0.721154	3.73934		27.9	1.796	2.757	1.306	0.84	0.29	0.46	0.69	1.27	1.26	1.77	2.08	2.7
126	TAN2206_SW-100_11-12cm	14/05/2024 13:47:04	11.5	2.37	3.64	5.32	8.25	18.8	34.1	43	51.7	64.1	0.00237	0.00364	0.00532	0.00825	0.0188	0.0341	0.043	0.0517	0.0641	8.7209	8.10185	7.55436	6.92139	5.73312	4.87408	4.53952	4.27369	3.96353	-3.01484	-0.75371	-4.75737	-0.720813	3.73565		27.7	1.837	2.754	1.315	0.84	0.29	0.46	0.69	1.27	1.26	1.77	2.07	2.7
127	TAN2206_SW-100_11-12cm	14/05/2024 13:47:29	11.5	2.38	3.65	5.33	8.26	18.8	34.1	43	51.7	64.1	0.00238	0.00365	0.00533	0.00826	0.0188	0.0341	0.043	0.0517	0.0641	8.71482	8.09789	7.55165	6.91964	5.73312	4.87408	4.53952	4.27369	3.96353	-3.01213	-0.753032	-4.75129	-0.719893	3.73202		27.8	1.79	2.753	1.305	0.83	0.29	0.46	0.69	1.27	1.25	1.76	2.07	2.69
128	TAN2206_SW-100_11-12cm	14/05/2024 13:47:52	11.5	2.38	3.65	5.35	8.28	18.8	34.1	43	51.7	64.1	0.00238	0.00365	0.00535	0.00828	0.0188	0.0341	0.043	0.0517	0.0641	8.71482	8.09789	7.54625	6.91615	5.73312	4.87408	4.53952	4.27369	3.96353	-3.00673	-0.751681	-4.75129	-0.719893	3.72662		27.8	1.804	2.752	1.307	0.84	0.28	0.45	0.68	1.26	1.25	1.76	2.06	2.68
129	TAN2206_SW-100_11-12cm	14/05/2024 13:48:16	11.5	2.38	3.66	5.36	8.31	18.9	34.2	43.1	51.8	64.3	0.00238	0.00366	0.00536	0.00831	0.0189	0.0342	0.0431	0.0518	0.0643	8.71482	8.09394	7.54355	6.91094	5.72547	4.86986	4.53617	4.2709	3.95904	-3.00738	-0.751846	-4.75579	-0.720574	3.72796		27.8	1.812	2.752	1.309	0.83	0.29	0.46	0.68	1.26	1.25	1.75	2.05	2.67
130	TAN2206_SW-100_11-12cm	14/05/2024 13:48:41	11.5	2.38	3.66	5.37	8.32	18.9	34.2	43.1	51.8	64.2	0.00238	0.00366	0.00537	0.00832	0.0189	0.0342	0.0431	0.0518	0.0642	8.71482	8.09394	7.54086	6.9092	5.72547	4.86986	4.53617	4.2709	3.96128	-3.00469	-0.751173	-4.75354	-0.720233	3.72493		27.8	1.808	2.751	1.307	0.83	0.28	0.45	0.68	1.26	1.25	1.75	2.05	2.67
131	TAN2206_SW-100_11-12cm	14/05/2024 13:49:04	11.5	2.38	3.66	5.37	8.32	18.9	34.2	43.2	51.9	64.4	0.00238	0.00366	0.00537	0.00832	0.0189	0.0342	0.0432	0.0519	0.0644	8.71482	8.09394	7.54086	6.9092	5.72547	4.86986	4.53282	4.26812	3.9568	-3.00804	-0.752009	-4.75803	-0.720913	3.72895		27.8	1.818	2.753	1.311	0.83	0.29	0.46	0.68	1.26	1.25	1.75	2.05	2.67
132	Average of 'TAN2206_SW-100_11-12cm'	14/05/2024 13:45:28	11.5	2.37	3.64	5.32	8.24	18.8	34.1	43	51.8	64.2	0.00237	0.00364	0.00532	0.00824	0.0188	0.0341	0.043	0.0518	0.0642	8.7209	8.10185	7.55436	6.92314	5.73312	4.87408	4.53952	4.2709	3.96128	-3.01484	-0.75371	-4.75961	-0.721154	3.73599		27.7	1.834	2.757	1.315	0.85	0.29	0.46	0.69	1.27	1.26	1.77	2.07	2.7
133	TAN2206_SW-100_12-13cm	14/05/2024 14:00:06	12.5	2.3	3.51	5.12	7.93	18.3	33.5	42.4	51.2	63.6	0.0023	0.00351	0.00512	0.00793	0.0183	0.0335	0.0424	0.0512	0.0636	8.76415	8.15431	7.60964	6.97846	5.77201	4.8997	4.55979	4.28771	3.97483	-3.04985	-0.762462	-4.78932	-0.725655	3.7755		27.4	1.919	2.781	1.338	0.93	0.3	0.48	0.72	1.32	1.3	1.84	2.17	2.82
134	TAN2206_SW-100_12-13cm	14/05/2024 14:00:30	12.5	2.31	3.53	5.14	7.95	18.3	33.6	42.6	51.4	64	0.00231	0.00353	0.00514	0.00795	0.0183	0.0336	0.0426	0.0514	0.064	8.75789	8.14612	7.60402	6.97483	5.77201	4.89539	4.553	4.28209	3.96578	-3.05101	-0.762753	-4.79211	-0.726077	3.77709		27.4	1.948	2.78	1.347	0.91	0.3	0.48	0.72	1.31	1.3	1.83	2.16	2.81
135	TAN2206_SW-100_12-13cm	14/05/2024 14:00:53	12.5	2.33	3.55	5.17	7.99	18.4	33.7	42.6	51.4	63.9	0.00233	0.00355	0.00517	0.00799	0.0184	0.0337	0.0426	0.0514	0.0639	8.74545	8.13797	7.59562	6.96759	5.76415	4.89111	4.553	4.28209	3.96804	-3.04262	-0.760654	-4.77741	-0.723851	3.76647		27.5	1.913	2.774	1.338	0.9	0.3	0.47	0.71	1.3	1.29	1.82	2.15	2.79
136	TAN2206_SW-100_12-13cm	14/05/2024 14:01:18	12.5	2.33	3.56	5.19	8.02	18.4	33.7	42.6	51.4	63.8	0.00233	0.00356	0.00519	0.00802	0.0184	0.0337	0.0426	0.0514	0.0638	8.74545	8.13391	7.59005	6.96218	5.76415	4.89111	4.553	4.28209	3.9703	-3.03705	-0.759262	-4.77515	-0.723508	3.76056		27.5	1.91	2.77	1.335	0.88	0.3	0.47	0.71	1.3	1.29	1.81	2.14	2.78
137	TAN2206_SW-100_12-13cm	14/05/2024 14:01:41	12.5	2.34	3.57	5.21	8.05	18.5	33.8	42.7	51.6	64.2	0.00234	0.00357	0.00521	0.00805	0.0185	0.0338	0.0427	0.0516	0.0642	8.73928	8.12986	7.5845	6.9568	5.75633	4.88683	4.54962	4.27649	3.96128	-3.03488	-0.75872	-4.77799	-0.723938	3.75882		27.5	1.95	2.771	1.345	0.88	0.29	0.47	0.7	1.29	1.28	1.81	2.13	2.77
138	TAN2206_SW-100_12-13cm	14/05/2024 14:02:05	12.5	2.34	3.58	5.22	8.07	18.5	33.8	42.7	51.5	64.1	0.00234	0.00358	0.00522	0.00807	0.0185	0.0338	0.0427	0.0515	0.0641	8.73928	8.12582	7.58173	6.95322	5.75633	4.88683	4.54962	4.27928	3.96353	-3.03211	-0.758029	-4.77574	-0.723598	3.75571		27.5	1.936	2.768	1.342	0.87	0.29	0.47	0.7	1.29	1.28	1.8	2.12	2.77
139	TAN2206_SW-100_12-13cm	14/05/2024 14:02:28	12.5	2.34	3.58	5.23	8.08	18.5	33.8	42.6	51.4	63.8	0.00234	0.00358	0.00523	0.00808	0.0185	0.0338	0.0426	0.0514	0.0638	8.73928	8.12582	7.57897	6.95143	5.75633	4.88683	4.553	4.28209	3.9703	-3.02597	-0.756493	-4.76898	-0.722572	3.74854		27.6	1.875	2.764	1.326	0.87	0.29	0.47	0.7	1.29	1.28	1.8	2.12	2.76
140	TAN2206_SW-100_12-13cm	14/05/2024 14:02:52	12.5	2.35	3.59	5.24	8.1	18.5	33.8	42.7	51.5	64.1	0.00235	0.00359	0.00524	0.0081	0.0185	0.0338	0.0427	0.0515	0.0641	8.73312	8.1218	7.57622	6.94786	5.75633	4.88683	4.54962	4.27928	3.96353	-3.0266	-0.756649	-4.76959	-0.722665	3.74926		27.5	1.93	2.766	1.339	0.87	0.29	0.47	0.7	1.29	1.27	1.8	2.11	2.75
141	TAN2206_SW-100_12-13cm	14/05/2024 14:03:16	12.5	2.34	3.59	5.23	8.09	18.5	33.8	42.6	51.4	63.9	0.00234	0.00359	0.00523	0.00809	0.0185	0.0338	0.0426	0.0514	0.0639	8.73928	8.1218	7.57897	6.94964	5.75633	4.88683	4.553	4.28209	3.96804	-3.02597	-0.756493	-4.77124	-0.722914	3.74889		27.5	1.92	2.765	1.336	0.88	0.29	0.47	0.7	1.29	1.28	1.8	2.11	2.75
142	TAN2206_SW-100_12-13cm	14/05/2024 14:03:39	12.5	2.35	3.59	5.24	8.1	18.5	33.7	42.6	51.4	63.8	0.00235	0.00359	0.00524	0.0081	0.0185	0.0337	0.0426	0.0514	0.0638	8.73312	8.1218	7.57622	6.94786	5.75633	4.89111	4.553	4.28209	3.9703	-3.02321	-0.755804	-4.76282	-0.72164	3.74485		27.5	1.889	2.762	1.329	0.87	0.29	0.47	0.7	1.29	1.27	1.79	2.11	2.75
143	Average of 'TAN2206_SW-100_12-13cm'	14/05/2024 14:00:06	12.5	2.33	3.57	5.2	8.04	18.4	33.7	42.6	51.4	63.9	0.00233	0.00357	0.0052	0.00804	0.0184	0.0337	0.0426	0.0514	0.0639	8.74545	8.12986	7.58727	6.95859	5.76415	4.89111	4.553	4.28209	3.96804	-3.03427	-0.758567	-4.77741	-0.723851	3.75812		27.5	1.92	2.77	1.337	0.89	0.3	0.47	0.71	1.3	1.28	1.81	2.13	2.77
144	TAN2206_SW-100_13-14cm	14/05/2024 14:25:55	13.5	2.53	3.88	5.67	8.8	20.1	36.2	45.5	54.8	67.3	0.00253	0.00388	0.00567	0.0088	0.0201	0.0362	0.0455	0.0548	0.0673	8.62665	8.00973	7.46244	6.82828	5.63666	4.78787	4.45799	4.18968	3.89325	-3.00445	-0.751111	-4.7334	-0.717181	3.72163		29.7	1.626	2.737	1.268	0.61	0.24	0.4	0.61	1.17	1.18	1.67	1.96	2.56
145	TAN2206_SW-100_13-14cm	14/05/2024 14:26:19	13.5	2.53	3.89	5.67	8.79	20.1	36.2	45.5	54.8	67.3	0.00253	0.00389	0.00567	0.00879	0.0201	0.0362	0.0455	0.0548	0.0673	8.62665	8.00601	7.46244	6.82992	5.63666	4.78787	4.45799	4.18968	3.89325	-3.00445	-0.751111	-4.7334	-0.717181	3.72163		29.7	1.627	2.736	1.269	0.6	0.24	0.39	0.61	1.17	1.17	1.66	1.96	2.57
146	TAN2206_SW-100_13-14cm	14/05/2024 14:26:42	13.5	2.54	3.91	5.7	8.83	20.1	36.3	45.5	54.8	67.2	0.00254	0.00391	0.0057	0.00883	0.0201	0.0363	0.0455	0.0548	0.0672	8.62096	7.99862	7.45482	6.82337	5.63666	4.78389	4.45799	4.18968	3.89539	-2.99683	-0.749208	-4.72556	-0.715994	3.71283		29.9	1.576	2.732	1.254	0.59	0.24	0.39	0.61	1.16	1.17	1.66	1.95	2.55
147	TAN2206_SW-100_13-14cm	14/05/2024 14:27:08	13.5	2.55	3.91	5.71	8.85	20.2	36.3	45.5	54.8	67.2	0.00255	0.00391	0.00571	0.00885	0.0202	0.0363	0.0455	0.0548	0.0672	8.61529	7.99862	7.45229	6.82011	5.6295	4.78389	4.45799	4.18968	3.89539	-2.9943	-0.748576	-4.71989	-0.715135	3.70944		29.8	1.582	2.73	1.256	0.58	0.24	0.39	0.61	1.16	1.17	1.65	1.95	2.55
148	TAN2206_SW-100_13-14cm	14/05/2024 14:27:31	13.5	2.55	3.92	5.72	8.86	20.2	36.3	45.6	54.9	67.4	0.00255	0.00392	0.00572	0.00886	0.0202	0.0363	0.0456	0.0549	0.0674	8.61529	7.99493	7.44977	6.81848	5.6295	4.78389	4.45482	4.18705	3.89111	-2.99495	-0.748737	-4.72418	-0.715785	3.71073		29.8	1.61	2.73	1.263	0.58	0.24	0.39	0.61	1.16	1.16	1.65	1.94	2.54
149	TAN2206_SW-100_13-14cm	14/05/2024 14:27:56	13.5	2.55	3.92	5.73	8.88	20.2	36.3	45.5	54.8	67.3	0.00255	0.00392	0.00573	0.00888	0.0202	0.0363	0.0455	0.0548	0.0673	8.61529	7.99493	7.44725	6.81522	5.6295	4.78389	4.45799	4.18968	3.89325	-2.98926	-0.747315	-4.72204	-0.71546	3.70472		29.8	1.614	2.728	1.262	0.58	0.24	0.39	0.6	1.16	1.16	1.65	1.94	2.54
150	TAN2206_SW-100_13-14cm	14/05/2024 14:28:19	13.5	2.55	3.93	5.74	8.9	20.2	36.3	45.5	54.9	67.4	0.00255	0.00393	0.00574	0.0089	0.0202	0.0363	0.0455	0.0549	0.0674	8.61529	7.99125	7.44473	6.81198	5.6295	4.78389	4.45799	4.18705	3.89111	-2.98674	-0.746686	-4.72418	-0.715785	3.70253		29.7	1.631	2.727	1.267	0.58	0.24	0.39	0.6	1.16	1.16	1.65	1.93	2.53
151	TAN2206_SW-100_13-14cm	14/05/2024 14:28:43	13.5	2.55	3.94	5.76	8.92	20.3	36.4	45.6	54.9	67.4	0.00255	0.00394	0.00576	0.00892	0.0203	0.0364	0.0456	0.0549	0.0674	8.61529	7.98759	7.43972	6.80874	5.62238	4.77992	4.45482	4.18705	3.89111	-2.98489	-0.746223	-4.72418	-0.715785	3.70068		29.9	1.581	2.727	1.254	0.58	0.24	0.39	0.6	1.15	1.16	1.64	1.93	2.52
152	TAN2206_SW-100_13-14cm	14/05/2024 14:29:06	13.5	2.55	3.94	5.75	8.92	20.2	36.3	45.5	54.8	67.2	0.00255	0.00394	0.00575	0.00892	0.0202	0.0363	0.0455	0.0548	0.0672	8.61529	7.98759	7.44222	6.80874	5.6295	4.78389	4.45799	4.18968	3.89539	-2.98423	-0.746058	-4.71989	-0.715135	3.69937		29.8	1.58	2.725	1.253	0.58	0.24	0.39	0.6	1.15	1.16	1.64	1.93	2.52
153	TAN2206_SW-100_13-14cm	14/05/2024 14:29:32	13.5	2.56	3.95	5.77	8.95	20.3	36.4	45.6	54.9	67.3	0.00256	0.00395	0.00577	0.00895	0.0203	0.0364	0.0456	0.0549	0.0673	8.60964	7.98393	7.43721	6.8039	5.62238	4.77992	4.45482	4.18705	3.89325	-2.98239	-0.745598	-4.71639	-0.714605	3.697		29.9	1.586	2.725	1.254	0.58	0.24	0.39	0.6	1.15	1.16	1.63	1.92	2.51
154	Average of 'TAN2206_SW-100_13-14cm'	14/05/2024 14:25:55	13.5	2.55	3.92	5.72	8.87	20.2	36.3	45.5	54.8	67.3	0.00255	0.00392	0.00572	0.00887	0.0202	0.0363	0.0455	0.0548	0.0673	8.61529	7.99493	7.44977	6.81685	5.6295	4.78389	4.45799	4.18968	3.89325	-2.99178	-0.747945	-4.72204	-0.71546	3.70724		29.8	1.601	2.73	1.26	0.59	0.24	0.39	0.61	1.16	1.16	1.65	1.94	2.54
155	TAN2206_SW-100_14-15cm	14/05/2024 14:39:54	14.5	2.46	3.79	5.54	8.62	19.7	35.8	45.2	54.6	67.4	0.00246	0.00379	0.00554	0.00862	0.0197	0.0358	0.0452	0.0546	0.0674	8.66713	8.04359	7.4959	6.8581	5.66566	4.8039	4.46753	4.19496	3.89111	-3.02836	-0.757091	-4.77602	-0.723639	3.752		29.1	1.748	2.765	1.303	0.74	0.26	0.42	0.64	1.2	1.2	1.69	2	2.61
156	TAN2206_SW-100_14-15cm	14/05/2024 14:40:17	14.5	2.48	3.8	5.56	8.64	19.8	36	45.3	54.8	67.5	0.00248	0.0038	0.00556	0.00864	0.0198	0.036	0.0453	0.0548	0.0675	8.65544	8.03978	7.4907	6.85475	5.65836	4.79586	4.46435	4.18968	3.88897	-3.02635	-0.756589	-4.76648	-0.722193	3.74855		29.4	1.693	2.763	1.291	0.72	0.26	0.41	0.63	1.19	1.19	1.69	1.99	2.6
157	TAN2206_SW-100_14-15cm	14/05/2024 14:40:43	14.5	2.49	3.82	5.59	8.69	19.9	36.1	45.4	54.9	67.7	0.00249	0.00382	0.00559	0.00869	0.0199	0.0361	0.0454	0.0549	0.0677	8.64964	8.03221	7.48294	6.84643	5.65109	4.79186	4.46116	4.18705	3.8847	-3.02177	-0.755443	-4.76494	-0.72196	3.74373		29.4	1.697	2.76	1.291	0.71	0.25	0.41	0.63	1.18	1.18	1.68	1.98	2.59
158	TAN2206_SW-100_14-15cm	14/05/2024 14:41:06	14.5	2.5	3.84	5.62	8.72	19.9	35.9	45.2	54.6	67.1	0.0025	0.00384	0.00562	0.00872	0.0199	0.0359	0.0452	0.0546	0.0671	8.64386	8.02468	7.47521	6.84146	5.65109	4.79987	4.46753	4.19496	3.89754	-3.00768	-0.75192	-4.74631	-0.719138	3.72682		29.3	1.694	2.744	1.286	0.64	0.25	0.41	0.63	1.18	1.18	1.68	1.98	2.58
159	TAN2206_SW-100_14-15cm	14/05/2024 14:41:31	14.5	2.51	3.86	5.64	8.76	20	36.1	45.4	54.8	67.4	0.00251	0.00386	0.00564	0.00876	0.02	0.0361	0.0454	0.0548	0.0674	8.6381	8.01718	7.47009	6.83485	5.64386	4.79186	4.46116	4.18968	3.89111	-3.00893	-0.752231	-4.74699	-0.719241	3.72817		29.5	1.662	2.744	1.279	0.64	0.25	0.41	0.63	1.18	1.18	1.67	1.96	2.57
160	TAN2206_SW-100_14-15cm	14/05/2024 14:41:56	14.5	2.51	3.86	5.64	8.75	19.9	36	45.3	54.6	67.2	0.00251	0.00386	0.00564	0.00875	0.0199	0.036	0.0453	0.0546	0.0672	8.6381	8.01718	7.47009	6.8365	5.65109	4.79586	4.46435	4.19496	3.89539	-3.00574	-0.751436	-4.7427	-0.718591	3.72434		29.3	1.691	2.742	1.286	0.64	0.25	0.41	0.63	1.18	1.18	1.67	1.96	2.57
161	TAN2206_SW-100_14-15cm	14/05/2024 14:42:20	14.5	2.51	3.86	5.65	8.77	19.9	36	45.2	54.6	67.2	0.00251	0.00386	0.00565	0.00877	0.0199	0.036	0.0452	0.0546	0.0672	8.6381	8.01718	7.46753	6.83321	5.65109	4.79586	4.46753	4.19496	3.89539	-3	-0.75	-4.7427	-0.718591	3.71859		29.3	1.705	2.74	1.288	0.64	0.25	0.41	0.63	1.18	1.18	1.67	1.96	2.56
162	TAN2206_SW-100_14-15cm	14/05/2024 14:42:45	14.5	2.51	3.87	5.67	8.8	20	36.2	45.5	55	67.8	0.00251	0.00387	0.00567	0.0088	0.02	0.0362	0.0455	0.055	0.0678	8.6381	8.01345	7.46244	6.82828	5.64386	4.78787	4.45799	4.18442	3.88257	-3.00445	-0.751111	-4.75553	-0.720534	3.72498		29.4	1.693	2.745	1.289	0.64	0.25	0.41	0.62	1.17	1.17	1.66	1.95	2.55
163	TAN2206_SW-100_14-15cm	14/05/2024 14:43:11	14.5	2.52	3.88	5.68	8.83	20	36.2	45.5	54.9	67.7	0.00252	0.00388	0.00568	0.00883	0.02	0.0362	0.0455	0.0549	0.0677	8.63236	8.00973	7.45989	6.82337	5.64386	4.78787	4.45799	4.18705	3.8847	-3.0019	-0.750476	-4.74766	-0.719342	3.72125		29.4	1.688	2.742	1.286	0.63	0.25	0.41	0.62	1.17	1.17	1.65	1.95	2.54
164	TAN2206_SW-100_14-15cm	14/05/2024 14:43:35	14.5	2.52	3.89	5.69	8.84	20.1	36.2	45.6	55	67.8	0.00252	0.00389	0.00569	0.00884	0.0201	0.0362	0.0456	0.055	0.0678	8.63236	8.00601	7.45736	6.82174	5.63666	4.78787	4.45482	4.18442	3.88257	-3.00253	-0.750633	-4.74979	-0.719665	3.7222		29.4	1.683	2.743	1.286	0.63	0.25	0.41	0.62	1.17	1.17	1.65	1.94	2.54
165	Average of 'TAN2206_SW-100_14-15cm'	14/05/2024 14:39:54	14.5	2.5	3.85	5.63	8.74	19.9	36.1	45.4	54.8	67.5	0.0025	0.00385	0.00563	0.00874	0.0199	0.0361	0.0454	0.0548	0.0675	8.64386	8.02093	7.47265	6.83815	5.65109	4.79186	4.46116	4.18968	3.88897	-3.01149	-0.752871	-4.75489	-0.720438	3.73192		29.3	1.695	2.749	1.289	0.66	0.25	0.41	0.63	1.18	1.18	1.67	1.97	2.57
166	TAN2206_SW-100_15-16cm	14/05/2024 14:54:27	15.5	2.56	4.01	5.93	9.31	21.6	39.3	49.6	59.8	74.1	0.00256	0.00401	0.00593	0.00931	0.0216	0.0393	0.0496	0.0598	0.0741	8.60964	7.96218	7.39775	6.747	5.53282	4.66933	4.33352	4.06371	3.75438	-3.06424	-0.766059	-4.85526	-0.735645	3.79988		32.1	1.843	2.811	1.316	0.71	0.25	0.39	0.59	1.1	1.1	1.56	1.85	2.42
167	TAN2206_SW-100_15-16cm	14/05/2024 14:54:51	15.5	2.57	4.02	5.94	9.32	21.6	39.3	49.6	59.8	74.1	0.00257	0.00402	0.00594	0.00932	0.0216	0.0393	0.0496	0.0598	0.0741	8.60402	7.95859	7.39532	6.74545	5.53282	4.66933	4.33352	4.06371	3.75438	-3.06181	-0.765451	-4.84963	-0.734793	3.7966		32.1	1.858	2.806	1.319	0.7	0.24	0.39	0.59	1.1	1.1	1.56	1.84	2.42
168	TAN2206_SW-100_15-16cm	14/05/2024 14:55:14	15.5	2.58	4.04	5.96	9.35	21.6	39.3	49.6	59.8	74.2	0.00258	0.00404	0.00596	0.00935	0.0216	0.0393	0.0496	0.0598	0.0742	8.59841	7.95143	7.39047	6.74082	5.53282	4.66933	4.33352	4.06371	3.75244	-3.05696	-0.764239	-4.84598	-0.734239	3.79119		32.1	1.855	2.804	1.319	0.69	0.24	0.39	0.59	1.09	1.09	1.55	1.84	2.41
169	TAN2206_SW-100_15-16cm	14/05/2024 14:55:38	15.5	2.58	4.04	5.97	9.36	21.6	39.2	49.5	59.6	73.8	0.00258	0.00404	0.00597	0.00936	0.0216	0.0392	0.0495	0.0596	0.0738	8.59841	7.95143	7.38805	6.73928	5.53282	4.673	4.33643	4.06854	3.76024	-3.05163	-0.762906	-4.83818	-0.733057	3.78468		32.1	1.842	2.798	1.313	0.68	0.24	0.39	0.58	1.09	1.09	1.55	1.83	2.41
170	TAN2206_SW-100_15-16cm	14/05/2024 14:56:01	15.5	2.59	4.06	6	9.4	21.7	39.4	49.6	59.8	74.1	0.00259	0.00406	0.006	0.0094	0.0217	0.0394	0.0496	0.0598	0.0741	8.59283	7.9443	7.38082	6.73312	5.52616	4.66566	4.33352	4.06371	3.75438	-3.04731	-0.761826	-4.83845	-0.733098	3.7804		32.1	1.82	2.798	1.31	0.68	0.24	0.39	0.58	1.09	1.08	1.54	1.82	2.39
171	TAN2206_SW-100_15-16cm	14/05/2024 14:56:27	15.5	2.61	4.09	6.04	9.47	21.8	39.4	49.6	59.7	73.8	0.00261	0.00409	0.00604	0.00947	0.0218	0.0394	0.0496	0.0597	0.0738	8.58173	7.93368	7.37124	6.72242	5.51953	4.66566	4.33352	4.06613	3.76024	-3.03772	-0.75943	-4.8215	-0.73053	3.76825		32.2	1.774	2.783	1.296	0.61	0.24	0.39	0.58	1.08	1.08	1.53	1.82	2.38
172	TAN2206_SW-100_15-16cm	14/05/2024 14:56:52	15.5	2.61	4.09	6.04	9.47	21.8	39.4	49.6	59.7	73.9	0.00261	0.00409	0.00604	0.00947	0.0218	0.0394	0.0496	0.0597	0.0739	8.58173	7.93368	7.37124	6.72242	5.51953	4.66566	4.33352	4.06613	3.75828	-3.03772	-0.75943	-4.82345	-0.730826	3.76855		32.1	1.836	2.784	1.311	0.61	0.24	0.39	0.58	1.08	1.08	1.53	1.82	2.38
173	TAN2206_SW-100_15-16cm	14/05/2024 14:57:16	15.5	2.61	4.09	6.04	9.48	21.8	39.4	49.6	59.8	74.1	0.00261	0.00409	0.00604	0.00948	0.0218	0.0394	0.0496	0.0598	0.0741	8.58173	7.93368	7.37124	6.7209	5.51953	4.66566	4.33352	4.06371	3.75438	-3.03772	-0.75943	-4.82735	-0.731417	3.76914		32.1	1.872	2.785	1.319	0.61	0.24	0.39	0.58	1.08	1.08	1.53	1.81	2.38
174	TAN2206_SW-100_15-16cm	14/05/2024 14:57:39	15.5	2.61	4.1	6.06	9.51	21.8	39.5	49.8	60	74.3	0.00261	0.0041	0.00606	0.00951	0.0218	0.0395	0.0498	0.06	0.0743	8.58173	7.93016	7.36647	6.71634	5.51953	4.662	4.32771	4.05889	3.75049	-3.03876	-0.759689	-4.83124	-0.732006	3.77076		32.1	1.844	2.786	1.314	0.61	0.24	0.39	0.58	1.08	1.08	1.53	1.8	2.37
175	TAN2206_SW-100_15-16cm	14/05/2024 14:58:05	15.5	2.61	4.1	6.07	9.53	21.9	39.5	49.7	59.9	74.1	0.00261	0.0041	0.00607	0.00953	0.0219	0.0395	0.0497	0.0599	0.0741	8.58173	7.93016	7.36409	6.71331	5.51293	4.662	4.33061	4.0613	3.75438	-3.03348	-0.758369	-4.82735	-0.731417	3.76489		32.1	1.797	2.783	1.302	0.61	0.24	0.39	0.58	1.08	1.08	1.52	1.8	2.37
176	Average of 'TAN2206_SW-100_15-16cm'	14/05/2024 14:54:27	15.5	2.59	4.06	6	9.42	21.7	39.4	49.6	59.8	74	0.00259	0.00406	0.006	0.00942	0.0217	0.0394	0.0496	0.0598	0.074	8.59283	7.9443	7.38082	6.73006	5.52616	4.66566	4.33352	4.06371	3.75633	-3.04731	-0.761826	-4.8365	-0.732803	3.78011		32.1	1.834	2.794	1.312	0.65	0.24	0.39	0.58	1.09	1.09	1.54	1.82	2.39
177	TAN2206_SW-100_16-17cm	14/05/2024 15:08:21	16.5	2.78	4.43	6.63	10.6	25	45	56.4	67.5	82.9	0.00278	0.00443	0.00663	0.0106	0.025	0.045	0.0564	0.0675	0.0829	8.4907	7.81848	7.23678	6.55979	5.32193	4.47393	4.14816	3.88897	3.59248	-3.08861	-0.772154	-4.89822	-0.742154	3.83077		37.6	1.231	2.828	1.176	0.49	0.2	0.33	0.52	0.99	0.99	1.41	1.65	2.16
178	TAN2206_SW-100_16-17cm	14/05/2024 15:08:44	16.5	2.79	4.44	6.65	10.6	25.2	45.5	57.1	68.5	84.3	0.00279	0.00444	0.00665	0.0106	0.0252	0.0455	0.0571	0.0685	0.0843	8.48552	7.81522	7.23243	6.55979	5.31043	4.45799	4.13037	3.86775	3.56832	-3.10206	-0.775516	-4.9172	-0.74503	3.84709		37.9	1.622	2.841	1.254	0.48	0.2	0.33	0.51	0.98	0.99	1.4	1.64	2.15
179	TAN2206_SW-100_16-17cm	14/05/2024 15:09:09	16.5	2.8	4.47	6.69	10.7	25.2	45.5	57	68.3	83.8	0.0028	0.00447	0.00669	0.0107	0.0252	0.0455	0.057	0.0683	0.0838	8.48036	7.80551	7.22378	6.54625	5.31043	4.45799	4.13289	3.87197	3.57691	-3.09088	-0.772721	-4.90345	-0.742947	3.83383		38	1.507	2.832	1.226	0.48	0.2	0.33	0.51	0.98	0.98	1.39	1.63	2.14
180	TAN2206_SW-100_16-17cm	14/05/2024 15:09:34	16.5	2.81	4.48	6.71	10.7	25.2	45.4	56.9	68.2	83.8	0.00281	0.00448	0.00671	0.0107	0.0252	0.0454	0.0569	0.0682	0.0838	8.47521	7.80229	7.21947	6.54625	5.31043	4.46116	4.13543	3.87408	3.57691	-3.08404	-0.771011	-4.89831	-0.742168	3.82621		37.9	1.565	2.829	1.238	0.47	0.2	0.33	0.51	0.98	0.98	1.39	1.63	2.13
181	TAN2206_SW-100_16-17cm	14/05/2024 15:09:58	16.5	2.81	4.48	6.72	10.7	25.2	45.3	56.7	67.9	83.4	0.00281	0.00448	0.00672	0.0107	0.0252	0.0453	0.0567	0.0679	0.0834	8.47521	7.80229	7.21732	6.54625	5.31043	4.46435	4.14051	3.88044	3.58381	-3.07682	-0.769204	-4.89141	-0.741122	3.81794		37.8	1.484	2.824	1.219	0.47	0.2	0.33	0.51	0.97	0.98	1.38	1.62	2.13
182	TAN2206_SW-100_16-17cm	14/05/2024 15:10:21	16.5	2.81	4.49	6.73	10.8	25.3	45.3	56.7	67.7	82.9	0.00281	0.00449	0.00673	0.0108	0.0253	0.0453	0.0567	0.0677	0.0829	8.47521	7.79907	7.21518	6.53282	5.30472	4.46435	4.14051	3.8847	3.59248	-3.07467	-0.768668	-4.88273	-0.739808	3.81448		38	1.365	2.819	1.19	0.47	0.2	0.33	0.51	0.97	0.98	1.38	1.62	2.12
183	TAN2206_SW-100_16-17cm	14/05/2024 15:10:45	16.5	2.82	4.51	6.76	10.8	25.4	45.5	56.9	68	83.4	0.00282	0.00451	0.00676	0.0108	0.0254	0.0455	0.0569	0.068	0.0834	8.47009	7.79266	7.20876	6.53282	5.29903	4.45799	4.13543	3.87832	3.58381	-3.07333	-0.768333	-4.88628	-0.740346	3.81368		38	1.437	2.82	1.206	0.47	0.2	0.33	0.51	0.97	0.97	1.37	1.61	2.11
184	TAN2206_SW-100_16-17cm	14/05/2024 15:11:10	16.5	2.82	4.52	6.79	10.9	25.4	45.6	57.1	68.4	84	0.00282	0.00452	0.00679	0.0109	0.0254	0.0456	0.0571	0.0684	0.084	8.47009	7.78946	7.20237	6.51953	5.29903	4.45482	4.13037	3.86986	3.57347	-3.07201	-0.768002	-4.89662	-0.741912	3.81392		37.9	1.539	2.822	1.23	0.47	0.2	0.33	0.51	0.97	0.97	1.37	1.61	2.1
185	TAN2206_SW-100_16-17cm	14/05/2024 15:11:34	16.5	2.82	4.52	6.79	10.9	25.4	45.6	57.1	68.4	84	0.00282	0.00452	0.00679	0.0109	0.0254	0.0456	0.0571	0.0684	0.084	8.47009	7.78946	7.20237	6.51953	5.29903	4.45482	4.13037	3.86986	3.57347	-3.07201	-0.768002	-4.89662	-0.741912	3.81392		37.9	1.522	2.823	1.227	0.47	0.2	0.33	0.51	0.97	0.97	1.37	1.61	2.1
186	TAN2206_SW-100_16-17cm	14/05/2024 15:11:57	16.5	2.82	4.51	6.78	10.8	25.4	45.5	56.9	68	83.4	0.00282	0.00451	0.00678	0.0108	0.0254	0.0455	0.0569	0.068	0.0834	8.47009	7.79266	7.2045	6.53282	5.29903	4.45799	4.13543	3.87832	3.58381	-3.06907	-0.767268	-4.88628	-0.740346	3.80942		38	1.182	2.818	1.162	0.47	0.2	0.33	0.51	0.97	0.97	1.37	1.61	2.1
187	Average of 'TAN2206_SW-100_16-17cm'	14/05/2024 15:08:21	16.5	2.81	4.48	6.72	10.8	25.3	45.4	56.9	68.1	83.6	0.00281	0.00448	0.00672	0.0108	0.0253	0.0454	0.0569	0.0681	0.0836	8.47521	7.80229	7.21732	6.53282	5.30472	4.46116	4.13543	3.8762	3.58035	-3.0819	-0.770474	-4.89486	-0.741646	3.82354		37.9	1.452	2.826	1.214	0.47	0.2	0.33	0.51	0.97	0.98	1.38	1.62	2.13
188	TAN2206_SW-100_17-18cm	14/05/2024 15:24:00	17.5	2.59	4.08	6.08	9.66	22.9	41.9	52.7	63.6	78.5	0.00259	0.00408	0.00608	0.00966	0.0229	0.0419	0.0527	0.0636	0.0785	8.59283	7.93722	7.36171	6.69376	5.44851	4.57691	4.24605	3.97483	3.67116	-3.11566	-0.778915	-4.92167	-0.745707	3.86137		34.7	1.805	2.853	1.299	0.68	0.24	0.38	0.58	1.08	1.08	1.53	1.8	2.35
189	TAN2206_SW-100_17-18cm	14/05/2024 15:24:24	17.5	2.62	4.11	6.11	9.69	22.9	41.9	52.7	63.5	78.2	0.00262	0.00411	0.00611	0.00969	0.0229	0.0419	0.0527	0.0635	0.0782	8.57622	7.92665	7.35461	6.68929	5.44851	4.57691	4.24605	3.9771	3.67669	-3.10856	-0.77714	-4.89953	-0.742353	3.85091		34.7	1.524	2.837	1.251	0.61	0.24	0.38	0.58	1.08	1.08	1.52	1.8	2.35
190	TAN2206_SW-100_17-18cm	14/05/2024 15:24:47	17.5	2.63	4.13	6.14	9.74	23	41.9	52.7	63.5	78.1	0.00263	0.00413	0.00614	0.00974	0.023	0.0419	0.0527	0.0635	0.0781	8.57072	7.91964	7.34755	6.68186	5.44222	4.57691	4.24605	3.9771	3.67853	-3.10149	-0.775373	-4.89219	-0.741241	3.84273		34.9	1.495	2.832	1.242	0.6	0.24	0.38	0.57	1.07	1.07	1.51	1.79	2.34
191	TAN2206_SW-100_17-18cm	14/05/2024 15:25:11	17.5	2.63	4.14	6.14	9.75	23	41.8	52.6	63.3	77.8	0.00263	0.00414	0.00614	0.00975	0.023	0.0418	0.0526	0.0633	0.0778	8.57072	7.91615	7.34755	6.68038	5.44222	4.58035	4.24879	3.98165	3.68409	-3.09875	-0.774688	-4.88664	-0.740399	3.83915		34.8	1.491	2.828	1.24	0.6	0.24	0.38	0.57	1.07	1.07	1.51	1.78	2.34
192	TAN2206_SW-100_17-18cm	14/05/2024 15:25:34	17.5	2.64	4.15	6.18	9.81	23.1	42	52.9	63.6	78.3	0.00264	0.00415	0.00618	0.00981	0.0231	0.042	0.0529	0.0636	0.0783	8.56525	7.91267	7.33818	6.67153	5.43596	4.57347	4.24059	3.97483	3.67484	-3.09759	-0.774397	-4.8904	-0.74097	3.83856		34.9	1.502	2.83	1.244	0.59	0.23	0.38	0.57	1.07	1.06	1.5	1.77	2.32
193	TAN2206_SW-100_17-18cm	14/05/2024 15:26:00	17.5	2.64	4.17	6.2	9.84	23.1	42.1	52.9	63.6	78.3	0.00264	0.00417	0.0062	0.00984	0.0231	0.0421	0.0529	0.0636	0.0783	8.56525	7.90574	7.33352	6.66713	5.43596	4.57004	4.24059	3.97483	3.67484	-3.09293	-0.773232	-4.8904	-0.74097	3.8339		34.9	1.502	2.827	1.243	0.59	0.24	0.38	0.57	1.06	1.06	1.5	1.77	2.31
194	TAN2206_SW-100_17-18cm	14/05/2024 15:26:25	17.5	2.64	4.17	6.2	9.85	23.1	42.1	52.9	63.7	78.3	0.00264	0.00417	0.0062	0.00985	0.0231	0.0421	0.0529	0.0637	0.0783	8.56525	7.90574	7.33352	6.66566	5.43596	4.57004	4.24059	3.97256	3.67484	-3.09293	-0.773232	-4.8904	-0.74097	3.8339		34.9	1.477	2.827	1.238	0.59	0.24	0.38	0.57	1.06	1.06	1.5	1.76	2.31
195	TAN2206_SW-100_17-18cm	14/05/2024 15:26:50	17.5	2.64	4.17	6.2	9.85	23.1	42	52.9	63.7	78.6	0.00264	0.00417	0.0062	0.00985	0.0231	0.042	0.0529	0.0637	0.0786	8.56525	7.90574	7.33352	6.66566	5.43596	4.57347	4.24059	3.97256	3.66933	-3.09293	-0.773232	-4.89592	-0.741806	3.83473		34.7	1.801	2.829	1.296	0.59	0.23	0.38	0.57	1.06	1.06	1.5	1.76	2.31
196	TAN2206_SW-100_17-18cm	14/05/2024 15:27:13	17.5	2.64	4.17	6.21	9.86	23.1	42	52.8	63.5	78	0.00264	0.00417	0.00621	0.00986	0.0231	0.042	0.0528	0.0635	0.078	8.56525	7.90574	7.33119	6.6642	5.43596	4.57347	4.24332	3.9771	3.68038	-3.08787	-0.771968	-4.88486	-0.740131	3.828		35	1.469	2.824	1.233	0.59	0.24	0.38	0.57	1.06	1.06	1.5	1.76	2.3
197	TAN2206_SW-100_17-18cm	14/05/2024 15:27:38	17.5	2.65	4.18	6.23	9.89	23.2	42.1	52.8	63.5	78.1	0.00265	0.00418	0.00623	0.00989	0.0232	0.0421	0.0528	0.0635	0.0781	8.55979	7.90228	7.32655	6.65981	5.42973	4.57004	4.24332	3.9771	3.67853	-3.08323	-0.770808	-4.88126	-0.739585	3.82282		35	1.487	2.823	1.236	0.59	0.24	0.38	0.57	1.06	1.06	1.49	1.75	2.29
198	Average of 'TAN2206_SW-100_17-18cm'	14/05/2024 15:24:00	17.5	2.63	4.15	6.17	9.79	23.1	42	52.8	63.6	78.2	0.00263	0.00415	0.00617	0.00979	0.0231	0.042	0.0528	0.0636	0.0782	8.57072	7.91267	7.34051	6.67448	5.43596	4.57347	4.24332	3.97483	3.67669	-3.0972	-0.774299	-4.89403	-0.74152	3.83872		34.8	1.558	2.831	1.252	0.6	0.24	0.38	0.57	1.07	1.07	1.51	1.77	2.32
199	TAN2206_SW-100_18-19cm	14/05/2024 15:38:03	18.5	2.6	4.06	6.01	9.49	22.4	40.9	51.5	62.2	76.4	0.0026	0.00406	0.00601	0.00949	0.0224	0.0409	0.0515	0.0622	0.0764	8.58727	7.9443	7.37842	6.71938	5.48036	4.61176	4.27928	4.00694	3.71028	-3.09914	-0.774784	-4.87699	-0.738938	3.83807		33.9	1.606	2.827	1.269	0.62	0.24	0.39	0.58	1.09	1.09	1.55	1.83	2.4
200	TAN2206_SW-100_18-19cm	14/05/2024 15:38:27	18.5	2.61	4.08	6.04	9.52	22.5	41.1	51.8	62.5	76.7	0.00261	0.00408	0.00604	0.00952	0.0225	0.0411	0.0518	0.0625	0.0767	8.58173	7.93722	7.37124	6.71482	5.47393	4.60472	4.2709	4	3.70463	-3.10033	-0.775083	-4.8771	-0.738955	3.83929		34.2	1.559	2.826	1.258	0.6	0.24	0.38	0.58	1.09	1.09	1.54	1.82	2.39
201	TAN2206_SW-100_18-19cm	14/05/2024 15:38:51	18.5	2.61	4.1	6.06	9.55	22.5	41.2	51.8	62.6	77.1	0.00261	0.0041	0.00606	0.00955	0.0225	0.0412	0.0518	0.0626	0.0771	8.58173	7.93016	7.36647	6.71028	5.47393	4.60121	4.2709	3.99769	3.69713	-3.09556	-0.773891	-4.88461	-0.740092	3.83565		34	1.598	2.825	1.27	0.6	0.24	0.38	0.58	1.08	1.08	1.54	1.81	2.38
202	TAN2206_SW-100_18-19cm	14/05/2024 15:39:14	18.5	2.62	4.11	6.08	9.59	22.5	41.2	51.8	62.5	76.9	0.00262	0.00411	0.00608	0.00959	0.0225	0.0412	0.0518	0.0625	0.0769	8.57622	7.92665	7.36171	6.70425	5.47393	4.60121	4.2709	4	3.70087	-3.09081	-0.772702	-4.87534	-0.738689	3.8295		34.1	1.595	2.821	1.266	0.59	0.23	0.38	0.58	1.08	1.08	1.53	1.81	2.37
203	TAN2206_SW-100_18-19cm	14/05/2024 15:39:38	18.5	2.63	4.13	6.11	9.64	22.6	41.3	51.9	62.7	77.1	0.00263	0.00413	0.00611	0.00964	0.0226	0.0413	0.0519	0.0627	0.0771	8.57072	7.91964	7.35461	6.69675	5.46753	4.59771	4.26812	3.99539	3.69713	-3.08649	-0.771623	-4.8736	-0.738424	3.82491		34.1	1.582	2.819	1.264	0.59	0.23	0.38	0.57	1.07	1.07	1.52	1.79	2.35
204	TAN2206_SW-100_18-19cm	14/05/2024 15:40:01	18.5	2.63	4.13	6.11	9.64	22.6	41.2	51.8	62.5	76.9	0.00263	0.00413	0.00611	0.00964	0.0226	0.0412	0.0518	0.0625	0.0769	8.57072	7.91964	7.35461	6.69675	5.46753	4.60121	4.2709	4	3.70087	-3.08371	-0.770927	-4.86985	-0.737856	3.82156		34	1.597	2.817	1.266	0.59	0.23	0.38	0.57	1.07	1.07	1.52	1.79	2.35
205	TAN2206_SW-100_18-19cm	14/05/2024 15:40:26	18.5	2.64	4.14	6.13	9.68	22.7	41.4	52	62.7	77.1	0.00264	0.00414	0.00613	0.00968	0.0227	0.0414	0.052	0.0627	0.0771	8.56525	7.91615	7.3499	6.69078	5.46116	4.59423	4.26534	3.99539	3.69713	-3.08455	-0.771138	-4.86812	-0.737594	3.82215		34.2	1.556	2.817	1.256	0.58	0.23	0.38	0.57	1.07	1.07	1.51	1.79	2.34
206	TAN2206_SW-100_18-19cm	14/05/2024 15:40:49	18.5	2.63	4.13	6.12	9.65	22.6	41.2	51.7	62.4	76.6	0.00263	0.00413	0.00612	0.00965	0.0226	0.0412	0.0517	0.0624	0.0766	8.57072	7.91964	7.35225	6.69526	5.46753	4.60121	4.27369	4.00231	3.70651	-3.07856	-0.76964	-4.86421	-0.737001	3.81556		34.1	1.571	2.814	1.258	0.59	0.23	0.38	0.57	1.07	1.07	1.52	1.79	2.34
207	TAN2206_SW-100_18-19cm	14/05/2024 15:41:13	18.5	2.64	4.14	6.14	9.7	22.6	41.3	51.9	62.6	77	0.00264	0.00414	0.00614	0.0097	0.0226	0.0413	0.0519	0.0626	0.077	8.56525	7.91615	7.34755	6.6878	5.46753	4.59771	4.26812	3.99769	3.699	-3.07942	-0.769856	-4.86625	-0.73731	3.81673		34	1.592	2.814	1.264	0.58	0.23	0.38	0.57	1.07	1.07	1.51	1.78	2.33
208	TAN2206_SW-100_18-19cm	14/05/2024 15:41:36	18.5	2.63	4.14	6.15	9.7	22.6	41.3	51.9	62.7	77.1	0.00263	0.00414	0.00615	0.0097	0.0226	0.0413	0.0519	0.0627	0.0771	8.57072	7.91615	7.3452	6.6878	5.46753	4.59771	4.26812	3.99539	3.69713	-3.07708	-0.769269	-4.8736	-0.738424	3.8155		34.1	1.586	2.816	1.264	0.59	0.23	0.38	0.57	1.07	1.07	1.51	1.78	2.33
209	Average of 'TAN2206_SW-100_18-19cm'	14/05/2024 15:38:03	18.5	2.62	4.12	6.1	9.62	22.6	41.2	51.8	62.5	76.9	0.00262	0.00412	0.0061	0.00962	0.0226	0.0412	0.0518	0.0625	0.0769	8.57622	7.92314	7.35698	6.69975	5.46753	4.60121	4.2709	4	3.70087	-3.08607	-0.771518	-4.87534	-0.738689	3.82476		34.1	1.584	2.82	1.263	0.59	0.24	0.38	0.58	1.08	1.08	1.53	1.8	2.36
210	TAN2206_SW-100_19-20cm	14/05/2024 15:51:55	19.5	2.51	3.94	5.87	9.34	22.2	40.5	51	61.4	75.4	0.00251	0.00394	0.00587	0.00934	0.0222	0.0405	0.051	0.0614	0.0754	8.6381	7.98759	7.41242	6.74236	5.4933	4.62593	4.29336	4.02562	3.72929	-3.11906	-0.779766	-4.90881	-0.743758	3.86282		33.7	1.6	2.854	1.26	0.78	0.26	0.41	0.61	1.13	1.12	1.58	1.86	2.43
211	TAN2206_SW-100_19-20cm	14/05/2024 15:52:21	19.5	2.54	4.01	5.97	9.52	22.7	41.2	51.8	62.4	76.6	0.00254	0.00401	0.00597	0.00952	0.0227	0.0412	0.0518	0.0624	0.0766	8.62096	7.96218	7.38805	6.71482	5.46116	4.60121	4.2709	4.00231	3.70651	-3.11715	-0.779287	-4.91444	-0.744613	3.86176		34.3	1.555	2.855	1.25	0.74	0.25	0.4	0.6	1.11	1.1	1.55	1.83	2.39
212	TAN2206_SW-100_19-20cm	14/05/2024 15:52:44	19.5	2.56	4.05	6.04	9.65	22.9	41.4	51.9	62.5	76.5	0.00256	0.00405	0.00604	0.00965	0.0229	0.0414	0.0519	0.0625	0.0765	8.60964	7.94786	7.37124	6.69526	5.44851	4.59423	4.26812	4	3.7084	-3.10311	-0.775779	-4.90124	-0.742613	3.84573		34.5	1.493	2.846	1.232	0.73	0.25	0.4	0.59	1.09	1.08	1.53	1.81	2.36
213	TAN2206_SW-100_19-20cm	14/05/2024 15:53:08	19.5	2.57	4.06	6.06	9.68	22.9	41.6	52.1	62.7	77	0.00257	0.00406	0.00606	0.00968	0.0229	0.0416	0.0521	0.0627	0.077	8.60402	7.9443	7.36647	6.69078	5.44851	4.58727	4.26257	3.99539	3.699	-3.10389	-0.775973	-4.90502	-0.743185	3.84708		34.6	1.53	2.847	1.241	0.72	0.25	0.4	0.59	1.09	1.08	1.53	1.8	2.35
214	TAN2206_SW-100_19-20cm	14/05/2024 15:53:31	19.5	2.57	4.07	6.07	9.68	22.9	41.3	51.8	62.3	76.3	0.00257	0.00407	0.00607	0.00968	0.0229	0.0413	0.0518	0.0623	0.0763	8.60402	7.94076	7.36409	6.69078	5.44851	4.59771	4.2709	4.00462	3.71217	-3.09318	-0.773296	-4.89184	-0.741188	3.83437		34.5	1.523	2.839	1.236	0.72	0.25	0.4	0.59	1.09	1.08	1.52	1.8	2.35
215	TAN2206_SW-100_19-20cm	14/05/2024 15:53:55	19.5	2.58	4.09	6.1	9.75	23	41.6	52.1	62.7	77	0.00258	0.00409	0.0061	0.00975	0.023	0.0416	0.0521	0.0627	0.077	8.59841	7.93368	7.35698	6.68038	5.44222	4.58727	4.26257	3.99539	3.699	-3.0944	-0.773601	-4.89942	-0.742336	3.83674		34.5	1.531	2.841	1.241	0.71	0.25	0.39	0.59	1.08	1.07	1.52	1.78	2.33
216	TAN2206_SW-100_19-20cm	14/05/2024 15:54:19	19.5	2.58	4.09	6.12	9.77	23	41.7	52.2	62.8	77.1	0.00258	0.00409	0.00612	0.00977	0.023	0.0417	0.0522	0.0628	0.0771	8.59841	7.93368	7.35225	6.67743	5.44222	4.58381	4.25981	3.99309	3.69713	-3.09245	-0.773112	-4.90129	-0.742619	3.83507		34.7	1.494	2.841	1.232	0.71	0.25	0.39	0.59	1.08	1.07	1.51	1.78	2.32
217	TAN2206_SW-100_19-20cm	14/05/2024 15:54:44	19.5	2.58	4.09	6.12	9.77	23	41.5	52	62.5	76.6	0.00258	0.00409	0.00612	0.00977	0.023	0.0415	0.052	0.0625	0.0766	8.59841	7.93368	7.35225	6.67743	5.44222	4.59074	4.26534	4	3.70651	-3.08691	-0.771727	-4.8919	-0.741197	3.82811		34.6	1.489	2.837	1.228	0.71	0.25	0.39	0.59	1.08	1.07	1.51	1.78	2.32
218	TAN2206_SW-100_19-20cm	14/05/2024 15:55:08	19.5	2.58	4.1	6.13	9.79	23.1	41.6	52	62.4	76.3	0.00258	0.0041	0.00613	0.00979	0.0231	0.0416	0.052	0.0624	0.0763	8.59841	7.93016	7.3499	6.67448	5.43596	4.58727	4.26534	4.00231	3.71217	-3.08455	-0.771138	-4.88624	-0.740339	3.82489		34.8	1.405	2.834	1.207	0.71	0.25	0.39	0.59	1.08	1.07	1.51	1.77	2.32
219	TAN2206_SW-100_19-20cm	14/05/2024 15:55:31	19.5	2.58	4.1	6.13	9.8	23	41.6	52.1	62.6	76.6	0.00258	0.0041	0.00613	0.0098	0.023	0.0416	0.0521	0.0626	0.0766	8.59841	7.93016	7.3499	6.673	5.44222	4.58727	4.26257	3.99769	3.70651	-3.08732	-0.771831	-4.8919	-0.741197	3.82852		34.6	1.47	2.836	1.224	0.71	0.25	0.39	0.59	1.08	1.07	1.51	1.77	2.32
220	Average of 'TAN2206_SW-100_19-20cm'	14/05/2024 15:51:55	19.5	2.57	4.06	6.06	9.67	22.9	41.4	51.9	62.4	76.5	0.00257	0.00406	0.00606	0.00967	0.0229	0.0414	0.0519	0.0624	0.0765	8.60402	7.9443	7.36647	6.69227	5.44851	4.59423	4.26812	4.00231	3.7084	-3.09834	-0.774586	-4.89562	-0.741761	3.84011		34.5	1.509	2.843	1.235	0.73	0.25	0.4	0.59	1.09	1.08	1.53	1.8	2.35
221	TAN2206_SW-100_20-21cm	14/05/2024 16:05:53	20.5	2.65	4.15	6.16	9.82	23.3	42.1	52.8	63.4	77.9	0.00265	0.00415	0.00616	0.00982	0.0233	0.0421	0.0528	0.0634	0.0779	8.55979	7.91267	7.34285	6.67006	5.42353	4.57004	4.24332	3.97937	3.68223	-3.09954	-0.774884	-4.87756	-0.739024	3.83856		35.1	1.47	2.826	1.228	0.57	0.23	0.37	0.56	1.06	1.07	1.51	1.79	2.34
222	TAN2206_SW-100_20-21cm	14/05/2024 16:06:17	20.5	2.66	4.17	6.18	9.84	23.3	42.1	52.8	63.4	78	0.00266	0.00417	0.00618	0.00984	0.0233	0.0421	0.0528	0.0634	0.078	8.55436	7.90574	7.33818	6.66713	5.42353	4.57004	4.24332	3.97937	3.68038	-3.09486	-0.773715	-4.87398	-0.738481	3.83334		35.1	1.493	2.822	1.234	0.56	0.23	0.36	0.56	1.06	1.06	1.51	1.78	2.33
223	TAN2206_SW-100_20-21cm	14/05/2024 16:06:41	20.5	2.66	4.18	6.21	9.87	23.4	42.3	53	63.7	78.2	0.00266	0.00418	0.00621	0.00987	0.0234	0.0423	0.053	0.0637	0.0782	8.55436	7.90228	7.33119	6.66273	5.41735	4.5632	4.23786	3.97256	3.67669	-3.09333	-0.773332	-4.87767	-0.739041	3.83237		35.3	1.466	2.822	1.228	0.56	0.22	0.36	0.56	1.06	1.06	1.5	1.77	2.32
224	TAN2206_SW-100_20-21cm	14/05/2024 16:07:06	20.5	2.67	4.2	6.24	9.93	23.5	42.4	53.1	63.8	78.5	0.00267	0.0042	0.00624	0.00993	0.0235	0.0424	0.0531	0.0638	0.0785	8.54894	7.89539	7.32424	6.65399	5.4112	4.55979	4.23514	3.9703	3.67116	-3.08909	-0.772273	-4.87778	-0.739058	3.82815		35.4	1.461	2.821	1.226	0.55	0.22	0.36	0.56	1.05	1.05	1.49	1.76	2.31
225	TAN2206_SW-100_20-21cm	14/05/2024 16:07:30	20.5	2.68	4.22	6.27	9.98	23.6	42.4	53.2	63.8	78.3	0.00268	0.00422	0.00627	0.00998	0.0236	0.0424	0.0532	0.0638	0.0783	8.54355	7.88854	7.31732	6.64674	5.40507	4.55979	4.23243	3.9703	3.67484	-3.08489	-0.771222	-4.86871	-0.737683	3.82257		35.5	1.432	2.817	1.218	0.55	0.22	0.36	0.55	1.05	1.05	1.48	1.75	2.29
226	TAN2206_SW-100_20-21cm	14/05/2024 16:07:55	20.5	2.68	4.22	6.28	10	23.5	42.5	53.3	64	78.6	0.00268	0.00422	0.00628	0.01	0.0235	0.0425	0.0533	0.064	0.0786	8.54355	7.88854	7.31502	6.64386	5.4112	4.55639	4.22972	3.96578	3.66933	-3.0853	-0.771325	-4.87422	-0.738519	3.82382		35.4	1.441	2.818	1.223	0.55	0.22	0.36	0.55	1.05	1.05	1.48	1.75	2.29
227	TAN2206_SW-100_20-21cm	14/05/2024 16:08:19	20.5	2.69	4.23	6.3	10	23.7	42.6	53.3	63.9	78.5	0.00269	0.00423	0.0063	0.01	0.0237	0.0426	0.0533	0.0639	0.0785	8.53818	7.88513	7.31043	6.64386	5.39897	4.553	4.22972	3.96804	3.67116	-3.08071	-0.770178	-4.86701	-0.737426	3.81814		35.5	1.429	2.816	1.216	0.55	0.22	0.36	0.55	1.04	1.04	1.48	1.74	2.28
228	TAN2206_SW-100_20-21cm	14/05/2024 16:08:42	20.5	2.69	4.24	6.32	10.1	23.7	42.7	53.4	64.2	79	0.00269	0.00424	0.00632	0.0101	0.0237	0.0427	0.0534	0.0642	0.079	8.53818	7.88172	7.30586	6.6295	5.39897	4.54962	4.22702	3.96128	3.662	-3.07884	-0.769711	-4.87617	-0.738814	3.81766		35.4	1.743	2.818	1.271	0.54	0.22	0.36	0.55	1.04	1.04	1.47	1.73	2.27
229	TAN2206_SW-100_20-21cm	14/05/2024 16:09:06	20.5	2.69	4.24	6.32	10.1	23.7	42.7	53.5	64.2	78.8	0.00269	0.00424	0.00632	0.0101	0.0237	0.0427	0.0535	0.0642	0.0788	8.53818	7.88172	7.30586	6.6295	5.39897	4.54962	4.22432	3.96128	3.66566	-3.08154	-0.770386	-4.87252	-0.73826	3.8198		35.5	1.43	2.817	1.218	0.55	0.22	0.36	0.55	1.04	1.04	1.47	1.73	2.27
230	TAN2206_SW-100_20-21cm	14/05/2024 16:09:30	20.5	2.69	4.24	6.31	10.1	23.6	42.5	53.2	63.8	78.2	0.00269	0.00424	0.00631	0.0101	0.0236	0.0425	0.0532	0.0638	0.0782	8.53818	7.88172	7.30814	6.6295	5.40507	4.55639	4.23243	3.9703	3.67669	-3.07571	-0.768929	-4.86149	-0.736589	3.8123		35.5	1.396	2.812	1.207	0.54	0.22	0.36	0.55	1.04	1.04	1.47	1.74	2.27
231	Average of 'TAN2206_SW-100_20-21cm'	14/05/2024 16:05:53	20.5	2.67	4.21	6.26	9.97	23.5	42.4	53.2	63.8	78.4	0.00267	0.00421	0.00626	0.00997	0.0235	0.0424	0.0532	0.0638	0.0784	8.54894	7.89196	7.31962	6.64819	5.4112	4.55979	4.23243	3.9703	3.673	-3.08719	-0.771798	-4.87594	-0.738779	3.82597		35.4	1.478	2.819	1.227	0.55	0.22	0.36	0.55	1.05	1.05	1.49	1.75	2.3
232	TAN2206_SW-100_21-22cm	14/05/2024 16:28:40	21.5	2.64	4.14	6.14	9.73	22.8	41.2	51.7	62.3	76.3	0.00264	0.00414	0.00614	0.00973	0.0228	0.0412	0.0517	0.0623	0.0763	8.56525	7.91615	7.34755	6.68334	5.45482	4.60121	4.27369	4.00462	3.71217	-3.07385	-0.768463	-4.85307	-0.735314	3.80917		34	1.52	2.805	1.242	0.55	0.22	0.36	0.56	1.08	1.08	1.53	1.8	2.35
233	TAN2206_SW-100_21-22cm	14/05/2024 16:29:05	21.5	2.65	4.16	6.16	9.75	22.8	41.2	51.7	62.3	76.3	0.00265	0.00416	0.00616	0.00975	0.0228	0.0412	0.0517	0.0623	0.0763	8.55979	7.9092	7.34285	6.68038	5.45482	4.60121	4.27369	4.00462	3.71217	-3.06916	-0.767291	-4.84762	-0.734488	3.80365		34.1	1.505	2.802	1.238	0.54	0.22	0.36	0.56	1.07	1.08	1.53	1.79	2.34
234	TAN2206_SW-100_21-22cm	14/05/2024 16:29:31	21.5	2.66	4.17	6.17	9.77	22.8	41.3	51.8	62.5	76.6	0.00266	0.00417	0.00617	0.00977	0.0228	0.0413	0.0518	0.0625	0.0766	8.55436	7.90574	7.34051	6.67743	5.45482	4.59771	4.2709	4	3.70651	-3.06961	-0.767402	-4.84785	-0.734522	3.80413		34.1	1.533	2.801	1.246	0.53	0.22	0.36	0.56	1.07	1.08	1.52	1.79	2.34
235	TAN2206_SW-100_21-22cm	14/05/2024 16:29:54	21.5	2.67	4.18	6.2	9.8	22.9	41.3	51.7	62	75.7	0.00267	0.00418	0.0062	0.0098	0.0229	0.0413	0.0517	0.062	0.0757	8.54894	7.90228	7.33352	6.673	5.44851	4.59771	4.27369	4.01159	3.72356	-3.05982	-0.764956	-4.82538	-0.731118	3.79094		34.3	1.11	2.789	1.158	0.52	0.22	0.36	0.56	1.07	1.07	1.51	1.78	2.32
236	TAN2206_SW-100_21-22cm	14/05/2024 16:30:18	21.5	2.68	4.21	6.24	9.89	23	41.5	52	62.5	76.5	0.00268	0.00421	0.00624	0.00989	0.023	0.0415	0.052	0.0625	0.0765	8.54355	7.89196	7.32424	6.65981	5.44222	4.59074	4.26534	4	3.7084	-3.05889	-0.764723	-4.83515	-0.732599	3.79149		34.3	1.474	2.793	1.228	0.52	0.22	0.36	0.55	1.06	1.06	1.5	1.76	2.3
237	TAN2206_SW-100_21-22cm	14/05/2024 16:30:41	21.5	2.68	4.2	6.24	9.87	22.9	41.5	52	62.6	76.9	0.00268	0.0042	0.00624	0.00987	0.0229	0.0415	0.052	0.0626	0.0769	8.54355	7.89539	7.32424	6.66273	5.44851	4.59074	4.26534	3.99769	3.70087	-3.05889	-0.764723	-4.84268	-0.733739	3.79263		34.1	1.524	2.796	1.243	0.52	0.22	0.36	0.55	1.06	1.06	1.5	1.76	2.31
238	TAN2206_SW-100_21-22cm	14/05/2024 16:31:07	21.5	2.68	4.21	6.25	9.89	23	41.5	52	62.5	76.6	0.00268	0.00421	0.00625	0.00989	0.023	0.0415	0.052	0.0625	0.0766	8.54355	7.89196	7.32193	6.65981	5.44222	4.59074	4.26534	4	3.70651	-3.05658	-0.764146	-4.83704	-0.732885	3.78947		34.2	1.47	2.793	1.228	0.52	0.22	0.35	0.55	1.06	1.06	1.5	1.76	2.3
239	TAN2206_SW-100_21-22cm	14/05/2024 16:31:30	21.5	2.68	4.21	6.25	9.89	23	41.5	52.1	62.7	77	0.00268	0.00421	0.00625	0.00989	0.023	0.0415	0.0521	0.0627	0.077	8.54355	7.89196	7.32193	6.65981	5.44222	4.59074	4.26257	3.99539	3.699	-3.05936	-0.764839	-4.84455	-0.734023	3.79338		34.2	1.564	2.797	1.251	0.52	0.22	0.36	0.55	1.06	1.06	1.5	1.76	2.3
240	TAN2206_SW-100_21-22cm	14/05/2024 16:31:54	21.5	2.69	4.23	6.28	9.95	23.2	41.8	52.5	63.2	77.8	0.00269	0.00423	0.00628	0.00995	0.0232	0.0418	0.0525	0.0632	0.0778	8.53818	7.88513	7.31502	6.65109	5.42973	4.58035	4.25154	3.98393	3.68409	-3.06348	-0.76587	-4.85409	-0.735468	3.79895		34.4	1.544	2.801	1.249	0.52	0.22	0.35	0.55	1.05	1.06	1.49	1.75	2.29
241	TAN2206_SW-100_21-22cm	14/05/2024 16:32:17	21.5	2.68	4.22	6.27	9.94	23.1	41.5	52	62.6	76.7	0.00268	0.00422	0.00627	0.00994	0.0231	0.0415	0.052	0.0626	0.0767	8.54355	7.88854	7.31732	6.65254	5.43596	4.59074	4.26534	3.99769	3.70463	-3.05197	-0.762994	-4.83892	-0.73317	3.78514		34.3	1.532	2.792	1.239	0.52	0.22	0.36	0.55	1.05	1.06	1.49	1.75	2.29
242	Average of 'TAN2206_SW-100_21-22cm'	14/05/2024 16:28:40	21.5	2.67	4.19	6.22	9.85	22.9	41.4	51.9	62.5	76.6	0.00267	0.00419	0.00622	0.00985	0.0229	0.0414	0.0519	0.0625	0.0766	8.54894	7.89883	7.32887	6.66566	5.44851	4.59423	4.26812	4	3.70651	-3.06075	-0.765187	-4.84243	-0.733702	3.79445		34.2	1.483	2.797	1.233	0.53	0.22	0.36	0.56	1.06	1.07	1.51	1.77	2.31
243	TAN2206_SW-100_22-23cm	14/05/2024 16:39:53	22.5	2.81	4.45	6.64	10.6	25	45.2	56.8	68.3	84.6	0.00281	0.00445	0.00664	0.0106	0.025	0.0452	0.0568	0.0683	0.0846	8.47521	7.81198	7.2346	6.55979	5.32193	4.46753	4.13797	3.87197	3.5632	-3.09664	-0.774159	-4.91202	-0.744245	3.84088		37.4	28.822	2.859	3.784	0.45	0.19	0.32	0.5	0.97	0.99	1.4	1.66	2.18
244	TAN2206_SW-100_22-23cm	14/05/2024 16:40:19	22.5	2.81	4.45	6.61	10.5	24.9	44.9	56.4	67.5	83.2	0.00281	0.00445	0.00661	0.0105	0.0249	0.0449	0.0564	0.0675	0.0832	8.47521	7.81198	7.24113	6.57347	5.32771	4.47714	4.14816	3.88897	3.58727	-3.09297	-0.773243	-4.88794	-0.740597	3.83357		37.4	1.615	2.823	1.251	0.44	0.19	0.32	0.5	0.98	0.99	1.41	1.66	2.18
245	TAN2206_SW-100_22-23cm	14/05/2024 16:40:42	22.5	2.81	4.44	6.61	10.5	24.8	44.7	56	66.9	82.3	0.00281	0.00444	0.00661	0.0105	0.0248	0.0447	0.056	0.0669	0.0823	8.47521	7.81522	7.24113	6.57347	5.33352	4.48358	4.15843	3.90185	3.60296	-3.0827	-0.770676	-4.87225	-0.73822	3.82092		37.4	1.455	2.814	1.214	0.44	0.19	0.32	0.5	0.98	0.99	1.41	1.66	2.18
246	TAN2206_SW-100_22-23cm	14/05/2024 16:41:06	22.5	2.82	4.47	6.65	10.6	25	45	56.3	67.4	82.9	0.00282	0.00447	0.00665	0.0106	0.025	0.045	0.0563	0.0674	0.0829	8.47009	7.80551	7.23243	6.55979	5.32193	4.47393	4.15072	3.89111	3.59248	-3.08171	-0.770427	-4.87761	-0.739031	3.82074		37.5	1.501	2.816	1.224	0.44	0.19	0.32	0.5	0.97	0.98	1.4	1.65	2.17
247	TAN2206_SW-100_22-23cm	14/05/2024 16:41:29	22.5	2.82	4.48	6.67	10.6	25	44.9	56.2	67	81.9	0.00282	0.00448	0.00667	0.0106	0.025	0.0449	0.0562	0.067	0.0819	8.47009	7.80229	7.2281	6.55979	5.32193	4.47714	4.15329	3.8997	3.60999	-3.07481	-0.768703	-4.8601	-0.736378	3.81119		37.8	0.969	2.804	1.115	0.43	0.19	0.32	0.5	0.97	0.98	1.39	1.64	2.16
248	TAN2206_SW-100_22-23cm	14/05/2024 16:41:53	22.5	2.82	4.47	6.66	10.6	24.9	44.7	55.9	66.7	81.6	0.00282	0.00447	0.00666	0.0106	0.0249	0.0447	0.0559	0.0667	0.0816	8.47009	7.80551	7.23026	6.55979	5.32771	4.48358	4.16101	3.90617	3.61529	-3.06925	-0.767314	-4.8548	-0.735576	3.80483		37.5	0.971	2.802	1.117	0.44	0.19	0.32	0.5	0.97	0.98	1.4	1.65	2.16
249	TAN2206_SW-100_22-23cm	14/05/2024 16:42:17	22.5	2.83	4.49	6.7	10.7	25.1	45	56.4	67.3	82.6	0.00283	0.00449	0.0067	0.0107	0.0251	0.045	0.0564	0.0673	0.0826	8.46498	7.79907	7.22162	6.54625	5.31617	4.47393	4.14816	3.89325	3.59771	-3.07346	-0.768366	-4.86727	-0.737465	3.81093		37.7	1.414	2.81	1.202	0.43	0.19	0.32	0.5	0.97	0.98	1.39	1.63	2.15
250	TAN2206_SW-100_22-23cm	14/05/2024 16:42:40	22.5	2.82	4.48	6.68	10.6	25	44.9	56.2	67.2	82.6	0.00282	0.00448	0.00668	0.0106	0.025	0.0449	0.0562	0.0672	0.0826	8.47009	7.80229	7.22594	6.55979	5.32193	4.47714	4.15329	3.89539	3.59771	-3.07265	-0.768163	-4.87237	-0.738239	3.81089		37.4	1.464	2.811	1.216	0.44	0.19	0.32	0.5	0.97	0.98	1.39	1.64	2.15
251	TAN2206_SW-100_22-23cm	14/05/2024 16:43:04	22.5	2.83	4.5	6.71	10.7	25.1	45	56.3	67.4	82.8	0.00283	0.0045	0.00671	0.0107	0.0251	0.045	0.0563	0.0674	0.0828	8.46498	7.79586	7.21947	6.54625	5.31617	4.47393	4.15072	3.89111	3.59423	-3.06875	-0.767188	-4.87076	-0.737993	3.80674		37.4	1.253	2.809	1.181	0.44	0.19	0.32	0.5	0.97	0.98	1.39	1.63	2.14
252	TAN2206_SW-100_22-23cm	14/05/2024 16:43:28	22.5	2.83	4.51	6.73	10.7	25.2	45.2	56.7	68.1	83.9	0.00283	0.00451	0.00673	0.0107	0.0252	0.0452	0.0567	0.0681	0.0839	8.46498	7.79266	7.21518	6.54625	5.31043	4.46753	4.14051	3.8762	3.57519	-3.07467	-0.768668	-4.8898	-0.740878	3.81555		37.4	1.668	2.818	1.261	0.44	0.19	0.32	0.5	0.97	0.97	1.38	1.62	2.13
253	Average of 'TAN2206_SW-100_22-23cm'	14/05/2024 16:39:53	22.5	2.82	4.47	6.67	10.6	25	45	56.3	67.4	82.8	0.00282	0.00447	0.00667	0.0106	0.025	0.045	0.0563	0.0674	0.0828	8.47009	7.80551	7.2281	6.55979	5.32193	4.47393	4.15072	3.89111	3.59423	-3.07738	-0.769344	-4.87586	-0.738767	3.81614		37.5	7.571	2.817	1.681	0.44	0.19	0.32	0.5	0.97	0.98	1.39	1.64	2.16
254	TAN2206_SW-100_23-24cm	14/05/2024 16:52:50	23.5	2.61	4.14	6.18	9.93	24	44	55.4	66.4	81.6	0.00261	0.00414	0.00618	0.00993	0.024	0.044	0.0554	0.0664	0.0816	8.58173	7.91615	7.33818	6.65399	5.38082	4.50635	4.17397	3.91267	3.61529	-3.16421	-0.791052	-4.96645	-0.752492	3.9167		37.2	1.443	2.89	1.222	0.71	0.24	0.38	0.57	1.05	1.05	1.49	1.76	2.31
255	TAN2206_SW-100_23-24cm	14/05/2024 16:53:16	23.5	2.62	4.16	6.21	9.96	24.1	44.1	55.6	66.8	82.8	0.00262	0.00416	0.00621	0.00996	0.0241	0.0441	0.0556	0.0668	0.0828	8.57622	7.9092	7.33119	6.64964	5.37482	4.50308	4.16877	3.90401	3.59423	-3.16242	-0.790605	-4.98199	-0.754847	3.91727		36.9	1.729	2.894	1.287	0.69	0.24	0.38	0.57	1.05	1.04	1.48	1.75	2.3
256	TAN2206_SW-100_23-24cm	14/05/2024 16:53:40	23.5	2.64	4.18	6.25	10	24.2	44.3	55.7	66.9	82.7	0.00264	0.00418	0.00625	0.01	0.0242	0.0443	0.0557	0.0669	0.0827	8.56525	7.90228	7.32193	6.64386	5.36885	4.49655	4.16618	3.90185	3.59597	-3.15575	-0.788937	-4.96928	-0.752921	3.90867		37.1	1.647	2.888	1.267	0.68	0.24	0.38	0.56	1.04	1.03	1.47	1.74	2.29
257	TAN2206_SW-100_23-24cm	14/05/2024 16:54:03	23.5	2.65	4.2	6.28	10.1	24.2	44.3	55.7	66.8	82.5	0.00265	0.0042	0.00628	0.0101	0.0242	0.0443	0.0557	0.0668	0.0825	8.55979	7.89539	7.31502	6.6295	5.36885	4.49655	4.16618	3.90401	3.59946	-3.14884	-0.78721	-4.96033	-0.751565	3.90041		37.2	1.597	2.882	1.254	0.67	0.23	0.37	0.56	1.03	1.03	1.46	1.73	2.27
258	TAN2206_SW-100_23-24cm	14/05/2024 16:54:27	23.5	2.65	4.2	6.29	10.1	24.2	44.2	55.6	66.7	82.3	0.00265	0.0042	0.00629	0.0101	0.0242	0.0442	0.0556	0.0667	0.0823	8.55979	7.89539	7.31272	6.6295	5.36885	4.49981	4.16877	3.90617	3.60296	-3.14395	-0.785988	-4.95683	-0.751035	3.89499		36.9	1.319	2.877	1.208	0.67	0.24	0.37	0.56	1.03	1.03	1.46	1.73	2.27
259	TAN2206_SW-100_23-24cm	14/05/2024 16:54:50	23.5	2.65	4.22	6.31	10.1	24.3	44.3	55.7	66.8	82.4	0.00265	0.00422	0.00631	0.0101	0.0243	0.0443	0.0557	0.0668	0.0824	8.55979	7.88854	7.30814	6.6295	5.3629	4.49655	4.16618	3.90401	3.60121	-3.14197	-0.785491	-4.95858	-0.7513	3.89327		37.1	1.586	2.877	1.251	0.67	0.23	0.37	0.56	1.03	1.03	1.45	1.72	2.26
260	TAN2206_SW-100_23-24cm	14/05/2024 16:55:14	23.5	2.66	4.23	6.34	10.2	24.4	44.5	56	67.2	82.9	0.00266	0.00423	0.00634	0.0102	0.0244	0.0445	0.056	0.0672	0.0829	8.55436	7.88513	7.3013	6.61529	5.35698	4.49005	4.15843	3.89539	3.59248	-3.14287	-0.785718	-4.96187	-0.751799	3.89467		37.3	1.605	2.881	1.256	0.67	0.23	0.37	0.56	1.03	1.02	1.45	1.71	2.25
261	TAN2206_SW-100_23-24cm	14/05/2024 16:55:38	23.5	2.65	4.22	6.32	10.1	24.2	44.2	55.6	66.7	82.3	0.00265	0.00422	0.00632	0.0101	0.0242	0.0442	0.0556	0.0667	0.0823	8.55979	7.88854	7.30586	6.6295	5.36885	4.49981	4.16877	3.90617	3.60296	-3.13709	-0.784272	-4.95683	-0.751035	3.88812		37	1.581	2.875	1.251	0.67	0.23	0.37	0.56	1.03	1.03	1.45	1.72	2.26
262	TAN2206_SW-100_23-24cm	14/05/2024 16:56:01	23.5	2.66	4.23	6.33	10.2	24.3	44.4	55.8	67	82.7	0.00266	0.00423	0.00633	0.0102	0.0243	0.0444	0.0558	0.067	0.0827	8.55436	7.88513	7.30358	6.61529	5.3629	4.4933	4.16359	3.8997	3.59597	-3.13999	-0.784997	-4.95839	-0.751271	3.89126		37.1	1.632	2.878	1.262	0.67	0.24	0.37	0.56	1.03	1.02	1.45	1.71	2.25
263	TAN2206_SW-100_23-24cm	14/05/2024 16:56:27	23.5	2.66	4.24	6.36	10.2	24.4	44.4	55.9	67	82.8	0.00266	0.00424	0.00636	0.0102	0.0244	0.0444	0.0559	0.067	0.0828	8.55436	7.88172	7.29676	6.61529	5.35698	4.4933	4.16101	3.8997	3.59423	-3.13575	-0.783937	-4.96013	-0.751535	3.88728		37.1	1.611	2.877	1.257	0.66	0.23	0.37	0.56	1.03	1.02	1.44	1.71	2.24
264	Average of 'TAN2206_SW-100_23-24cm'	14/05/2024 16:52:50	23.5	2.65	4.2	6.29	10.1	24.2	44.3	55.7	66.8	82.5	0.00265	0.0042	0.00629	0.0101	0.0242	0.0443	0.0557	0.0668	0.0825	8.55979	7.89539	7.31272	6.6295	5.36885	4.49655	4.16618	3.90401	3.59946	-3.14655	-0.786636	-4.96033	-0.751565	3.89811		37.1	1.578	2.882	1.252	0.68	0.24	0.38	0.56	1.03	1.03	1.46	1.73	2.27
265	TAN2206_SW-100_24-25cm	15/05/2024 09:38:57	24.5	2.73	4.38	6.63	10.7	25.6	46.4	58.1	69.8	85.6	0.00273	0.00438	0.00663	0.0107	0.0256	0.0464	0.0581	0.0698	0.0856	8.51688	7.83485	7.23678	6.54625	5.28771	4.42973	4.10532	3.84063	3.54625	-3.13146	-0.782864	-4.97064	-0.753127	3.88458		38.8	1.502	2.877	1.229	0.55	0.22	0.36	0.55	1.02	1.01	1.41	1.64	2.13
266	TAN2206_SW-100_24-25cm	15/05/2024 09:39:21	24.5	2.74	4.41	6.66	10.7	25.7	46.7	58.6	70.6	86.7	0.00274	0.00441	0.00666	0.0107	0.0257	0.0467	0.0586	0.0706	0.0867	8.51161	7.82501	7.23026	6.54625	5.28209	4.42043	4.09296	3.82419	3.52782	-3.13731	-0.784327	-4.98378	-0.755119	3.89243		38.9	1.567	2.882	1.249	0.53	0.22	0.36	0.54	1.01	1	1.4	1.63	2.12
267	TAN2206_SW-100_24-25cm	15/05/2024 09:39:44	24.5	2.74	4.42	6.67	10.7	25.7	46.5	58.3	70	85.6	0.00274	0.00442	0.00667	0.0107	0.0257	0.0465	0.0583	0.07	0.0856	8.51161	7.82174	7.2281	6.54625	5.28209	4.42663	4.10036	3.8365	3.54625	-3.12774	-0.781934	-4.96536	-0.752328	3.88006		39.1	1.443	2.871	1.216	0.52	0.22	0.36	0.54	1.01	1	1.4	1.63	2.12
268	TAN2206_SW-100_24-25cm	15/05/2024 09:40:08	24.5	2.75	4.42	6.68	10.7	25.7	46.4	58	69.5	84.9	0.00275	0.00442	0.00668	0.0107	0.0257	0.0464	0.058	0.0695	0.0849	8.50635	7.82174	7.22594	6.54625	5.28209	4.42973	4.1078	3.84684	3.55809	-3.11813	-0.779533	-4.94826	-0.749737	3.86787		39.1	1.089	2.861	1.145	0.52	0.22	0.36	0.54	1.01	1	1.4	1.62	2.11
269	TAN2206_SW-100_24-25cm	15/05/2024 09:40:32	24.5	2.76	4.44	6.72	10.8	25.7	46.5	58.2	69.8	85.2	0.00276	0.00444	0.00672	0.0108	0.0257	0.0465	0.0582	0.0698	0.0852	8.50112	7.81522	7.21732	6.53282	5.28209	4.42663	4.10284	3.84063	3.553	-3.11449	-0.778622	-4.94811	-0.749714	3.8642		39.1	1.093	2.861	1.148	0.52	0.22	0.35	0.54	1	0.99	1.39	1.62	2.1
270	TAN2206_SW-100_24-25cm	15/05/2024 09:40:56	24.5	2.76	4.45	6.73	10.8	25.8	46.5	58.2	69.7	85.1	0.00276	0.00445	0.00673	0.0108	0.0258	0.0465	0.0582	0.0697	0.0851	8.50112	7.81198	7.21518	6.53282	5.27649	4.42663	4.10284	3.8427	3.5547	-3.11234	-0.778085	-4.94642	-0.749457	3.8618		39.1	1.091	2.857	1.146	0.51	0.22	0.35	0.54	1	0.99	1.39	1.61	2.1
271	TAN2206_SW-100_24-25cm	15/05/2024 09:41:19	24.5	2.76	4.46	6.75	10.9	25.8	46.6	58.3	70	85.5	0.00276	0.00446	0.00675	0.0109	0.0258	0.0466	0.0583	0.07	0.0855	8.50112	7.80874	7.2109	6.51953	5.27649	4.42353	4.10036	3.8365	3.54793	-3.11054	-0.777634	-4.95318	-0.750482	3.86102		39.1	1.116	2.859	1.154	0.51	0.22	0.35	0.54	1	0.99	1.38	1.61	2.09
272	TAN2206_SW-100_24-25cm	15/05/2024 09:41:43	24.5	2.77	4.48	6.78	10.9	25.9	46.6	58.2	69.7	85	0.00277	0.00448	0.00678	0.0109	0.0259	0.0466	0.0582	0.0697	0.085	8.4959	7.80229	7.2045	6.51953	5.2709	4.42353	4.10284	3.8427	3.55639	-3.10166	-0.775415	-4.9395	-0.74841	3.85007		39.2	1.08	2.853	1.14	0.51	0.22	0.35	0.54	0.99	0.98	1.37	1.6	2.08
273	TAN2206_SW-100_24-25cm	15/05/2024 09:42:06	24.5	2.76	4.47	6.76	10.9	25.8	46.6	58.2	69.8	85.2	0.00276	0.00447	0.00676	0.0109	0.0258	0.0466	0.0582	0.0698	0.0852	8.50112	7.80551	7.20876	6.51953	5.27649	4.42353	4.10284	3.84063	3.553	-3.10592	-0.776481	-4.94811	-0.749714	3.85564		39.1	1.094	2.856	1.147	0.51	0.22	0.35	0.54	1	0.99	1.38	1.6	2.09
274	TAN2206_SW-100_24-25cm	15/05/2024 09:42:30	24.5	2.77	4.47	6.77	10.9	25.9	46.6	58.2	69.7	85	0.00277	0.00447	0.00677	0.0109	0.0259	0.0466	0.0582	0.0697	0.085	8.4959	7.80551	7.20663	6.51953	5.2709	4.42353	4.10284	3.8427	3.55639	-3.10379	-0.775948	-4.9395	-0.74841	3.8522		39.3	1.051	2.854	1.134	0.51	0.22	0.35	0.54	1	0.99	1.38	1.6	2.08
275	Average of 'TAN2206_SW-100_24-25cm'	15/05/2024 09:38:57	24.5	2.75	4.44	6.72	10.8	25.8	46.5	58.2	69.9	85.4	0.00275	0.00444	0.00672	0.0108	0.0258	0.0465	0.0582	0.0699	0.0854	8.50635	7.81522	7.21732	6.53282	5.27649	4.42663	4.10284	3.83856	3.54962	-3.11449	-0.778622	-4.95673	-0.75102	3.86551		39.1	1.223	2.863	1.173	0.52	0.22	0.36	0.54	1	0.99	1.39	1.62	2.1
276	TAN2206_SW-100_25-26cm	15/05/2024 09:50:15	25.5	2.78	4.5	6.84	11.1	26.8	48.4	60.8	73.1	90.2	0.00278	0.0045	0.00684	0.0111	0.0268	0.0484	0.0608	0.0731	0.0902	8.4907	7.79586	7.19179	6.4933	5.22162	4.36885	4.03978	3.77398	3.47073	-3.152	-0.788001	-5.01997	-0.760602	3.9126		40.3	1.787	2.899	1.282	0.51	0.21	0.34	0.52	0.98	0.98	1.37	1.59	2.07
277	TAN2206_SW-100_25-26cm	15/05/2024 09:50:39	25.5	2.79	4.52	6.85	11.1	26.8	48.5	60.9	73.2	90.4	0.00279	0.00452	0.00685	0.0111	0.0268	0.0485	0.0609	0.0732	0.0904	8.48552	7.78946	7.18968	6.4933	5.22162	4.36587	4.03741	3.77201	3.46753	-3.15227	-0.788067	-5.01799	-0.760301	3.91257		40.5	1.808	2.898	1.286	0.5	0.21	0.34	0.52	0.98	0.97	1.37	1.59	2.07
278	TAN2206_SW-100_25-26cm	15/05/2024 09:51:03	25.5	2.8	4.54	6.89	11.2	26.9	48.6	61	73.2	89.9	0.0028	0.00454	0.00689	0.0112	0.0269	0.0486	0.061	0.0732	0.0899	8.48036	7.78309	7.18128	6.48036	5.21625	4.3629	4.03505	3.77201	3.47554	-3.14623	-0.786558	-5.00482	-0.758306	3.90454		40.7	1.379	2.89	1.206	0.5	0.21	0.34	0.52	0.98	0.97	1.36	1.58	2.05
279	TAN2206_SW-100_25-26cm	15/05/2024 09:51:26	25.5	2.81	4.55	6.9	11.2	27	48.7	61.1	73.3	90.2	0.00281	0.00455	0.0069	0.0112	0.027	0.0487	0.0611	0.0733	0.0902	8.47521	7.77992	7.17919	6.48036	5.2109	4.35993	4.03268	3.77004	3.47073	-3.1465	-0.786626	-5.00449	-0.758255	3.90476		40.8	1.638	2.891	1.249	0.49	0.21	0.34	0.52	0.97	0.97	1.36	1.58	2.05
280	TAN2206_SW-100_25-26cm	15/05/2024 09:51:52	25.5	2.81	4.55	6.91	11.2	26.9	48.7	61.1	73.4	90.5	0.00281	0.00455	0.00691	0.0112	0.0269	0.0487	0.0611	0.0734	0.0905	8.47521	7.77992	7.1771	6.48036	5.21625	4.35993	4.03268	3.76808	3.46594	-3.14441	-0.786104	-5.00928	-0.758981	3.9034		40.5	1.705	2.891	1.266	0.49	0.21	0.34	0.52	0.97	0.97	1.36	1.58	2.05
281	TAN2206_SW-100_25-26cm	15/05/2024 09:52:15	25.5	2.81	4.57	6.94	11.3	27	48.7	61	73.1	89.8	0.00281	0.00457	0.00694	0.0113	0.027	0.0487	0.061	0.0731	0.0898	8.47521	7.77359	7.17085	6.46753	5.2109	4.35993	4.03505	3.77398	3.47714	-3.1358	-0.78395	-4.99807	-0.757284	3.89309		40.7	1.37	2.884	1.202	0.49	0.21	0.34	0.52	0.97	0.96	1.35	1.57	2.04
282	TAN2206_SW-100_25-26cm	15/05/2024 09:52:39	25.5	2.81	4.57	6.94	11.3	26.9	48.5	60.8	72.9	89.5	0.00281	0.00457	0.00694	0.0113	0.0269	0.0485	0.0608	0.0729	0.0895	8.47521	7.77359	7.17085	6.46753	5.21625	4.36587	4.03978	3.77794	3.48197	-3.13106	-0.782766	-4.99325	-0.756552	3.88762		40.5	1.362	2.88	1.2	0.49	0.21	0.34	0.52	0.97	0.96	1.35	1.57	2.04
283	TAN2206_SW-100_25-26cm	15/05/2024 09:53:03	25.5	2.81	4.57	6.94	11.3	26.9	48.6	60.9	73.1	89.7	0.00281	0.00457	0.00694	0.0113	0.0269	0.0486	0.0609	0.0731	0.0897	8.47521	7.77359	7.17085	6.46753	5.21625	4.3629	4.03741	3.77398	3.47875	-3.13343	-0.783359	-4.99647	-0.75704	3.89047		40.5	1.382	2.881	1.206	0.49	0.21	0.34	0.52	0.97	0.96	1.35	1.57	2.04
284	TAN2206_SW-100_25-26cm	15/05/2024 09:53:27	25.5	2.82	4.58	6.96	11.3	27	48.6	60.8	72.7	88.6	0.00282	0.00458	0.00696	0.0113	0.027	0.0486	0.0608	0.0727	0.0886	8.47009	7.77044	7.1667	6.46753	5.2109	4.3629	4.03978	3.7819	3.49655	-3.12691	-0.781728	-4.97354	-0.753567	3.88048		40.9	0.975	2.872	1.117	0.49	0.21	0.34	0.51	0.97	0.96	1.35	1.56	2.03
285	TAN2206_SW-100_25-26cm	15/05/2024 09:53:52	25.5	2.81	4.57	6.93	11.3	26.9	48.5	60.8	73	89.6	0.00281	0.00457	0.00693	0.0113	0.0269	0.0485	0.0608	0.073	0.0896	8.47521	7.77359	7.17293	6.46753	5.21625	4.36587	4.03978	3.77596	3.48036	-3.13314	-0.783286	-4.99486	-0.756796	3.88994		40.5	1.384	2.881	1.207	0.49	0.21	0.34	0.52	0.97	0.97	1.35	1.57	2.04
286	Average of 'TAN2206_SW-100_25-26cm'	15/05/2024 09:50:15	25.5	2.81	4.55	6.91	11.2	26.9	48.6	60.9	73.1	89.8	0.00281	0.00455	0.00691	0.0112	0.0269	0.0486	0.0609	0.0731	0.0898	8.47521	7.77992	7.1771	6.48036	5.21625	4.3629	4.03741	3.77398	3.47714	-3.13968	-0.784921	-4.99807	-0.757284	3.89697		40.6	1.491	2.887	1.224	0.49	0.21	0.34	0.52	0.97	0.97	1.36	1.58	2.05
287	TAN2206_SW-100_26-27cm	15/05/2024 10:01:16	26.5	2.87	4.62	6.98	11.4	28.2	50.8	63.4	75.7	93	0.00287	0.00462	0.00698	0.0114	0.0282	0.0508	0.0634	0.0757	0.093	8.44473	7.75789	7.16256	6.45482	5.14816	4.29903	3.97937	3.72356	3.42663	-3.18318	-0.795796	-5.01811	-0.760319	3.9435		43	1.388	2.91	1.19	0.45	0.19	0.31	0.49	0.94	0.94	1.33	1.57	2.05
288	TAN2206_SW-100_26-27cm	15/05/2024 10:01:40	26.5	2.87	4.62	6.97	11.4	28.2	50.8	63.6	75.9	93.2	0.00287	0.00462	0.00697	0.0114	0.0282	0.0508	0.0636	0.0759	0.0932	8.44473	7.75789	7.16463	6.45482	5.14816	4.29903	3.97483	3.71976	3.42353	-3.1898	-0.797449	-5.02121	-0.760789	3.95059		43	1.391	2.911	1.194	0.44	0.19	0.31	0.49	0.94	0.94	1.33	1.57	2.06
289	TAN2206_SW-100_26-27cm	15/05/2024 10:02:03	26.5	2.88	4.65	7.01	11.5	28.4	51	63.8	76.1	93.4	0.00288	0.00465	0.00701	0.0115	0.0284	0.051	0.0638	0.0761	0.0934	8.43972	7.74855	7.15637	6.44222	5.13797	4.29336	3.9703	3.71596	3.42043	-3.18607	-0.796518	-5.01928	-0.760497	3.94657		43.3	1.36	2.909	1.184	0.43	0.19	0.31	0.49	0.93	0.94	1.33	1.56	2.04
290	TAN2206_SW-100_26-27cm	15/05/2024 10:02:27	26.5	2.89	4.65	7.03	11.5	28.3	51	63.9	76.4	94.2	0.00289	0.00465	0.00703	0.0115	0.0283	0.051	0.0639	0.0764	0.0942	8.43471	7.74855	7.15226	6.44222	5.14305	4.29336	3.96804	3.71028	3.40813	-3.18422	-0.796055	-5.02659	-0.761604	3.94582		42.8	1.543	2.912	1.229	0.43	0.19	0.31	0.48	0.93	0.94	1.32	1.55	2.04
291	TAN2206_SW-100_26-27cm	15/05/2024 10:02:50	26.5	2.9	4.67	7.06	11.6	28.4	51	63.8	76.3	94	0.0029	0.00467	0.00706	0.0116	0.0284	0.051	0.0638	0.0763	0.094	8.42973	7.74236	7.14612	6.42973	5.13797	4.29336	3.9703	3.71217	3.4112	-3.17582	-0.793954	-5.01854	-0.760384	3.9362		42.8	1.565	2.907	1.229	0.43	0.19	0.31	0.48	0.93	0.93	1.32	1.54	2.03
292	TAN2206_SW-100_26-27cm	15/05/2024 10:03:14	26.5	2.9	4.69	7.09	11.6	28.5	51.2	64	76.4	93.9	0.0029	0.00469	0.00709	0.0116	0.0285	0.0512	0.064	0.0764	0.0939	8.42973	7.7362	7.14	6.42973	5.13289	4.28771	3.96578	3.71028	3.41273	-3.17421	-0.793554	-5.017	-0.760152	3.93437		43.1	1.424	2.905	1.199	0.42	0.19	0.31	0.48	0.93	0.93	1.31	1.54	2.02
293	TAN2206_SW-100_26-27cm	15/05/2024 10:03:37	26.5	2.89	4.67	7.07	11.6	28.4	50.8	63.3	75.3	91.7	0.00289	0.00467	0.00707	0.0116	0.0284	0.0508	0.0633	0.0753	0.0917	8.43471	7.74236	7.14407	6.42973	5.13797	4.29903	3.98165	3.73121	3.44693	-3.16242	-0.790606	-4.98778	-0.755724	3.91815		43.3	0.794	2.888	1.064	0.43	0.19	0.31	0.49	0.93	0.93	1.32	1.54	2.02
294	TAN2206_SW-100_26-27cm	15/05/2024 10:04:03	26.5	2.89	4.68	7.08	11.6	28.4	50.8	63.3	75.2	91.7	0.00289	0.00468	0.00708	0.0116	0.0284	0.0508	0.0633	0.0752	0.0917	8.43471	7.73928	7.14203	6.42973	5.13797	4.29903	3.98165	3.73312	3.44693	-3.16038	-0.790096	-4.98778	-0.755724	3.91611		43.3	0.813	2.887	1.069	0.43	0.19	0.31	0.49	0.93	0.93	1.32	1.54	2.02
295	TAN2206_SW-100_26-27cm	15/05/2024 10:04:28	26.5	2.9	4.7	7.11	11.7	28.5	51.1	63.8	76	93.5	0.0029	0.0047	0.00711	0.0117	0.0285	0.0511	0.0638	0.076	0.0935	8.42973	7.73312	7.13593	6.41735	5.13289	4.29053	3.9703	3.71786	3.41889	-3.16563	-0.791409	-5.01084	-0.759218	3.92485		43	1.439	2.899	1.197	0.43	0.19	0.31	0.48	0.92	0.93	1.31	1.53	2.01
296	TAN2206_SW-100_26-27cm	15/05/2024 10:04:52	26.5	2.89	4.68	7.09	11.6	28.4	50.8	63.4	75.5	92.4	0.00289	0.00468	0.00709	0.0116	0.0284	0.0508	0.0634	0.0755	0.0924	8.43471	7.73928	7.14	6.42973	5.13797	4.29903	3.97937	3.72738	3.43596	-3.16063	-0.790156	-4.99875	-0.757387	3.91801		43	1.122	2.892	1.135	0.43	0.19	0.31	0.49	0.93	0.93	1.31	1.54	2.01
297	Average of 'TAN2206_SW-100_26-27cm'	15/05/2024 10:01:16	26.5	2.89	4.66	7.05	11.6	28.4	50.9	63.6	75.9	93.1	0.00289	0.00466	0.00705	0.0116	0.0284	0.0509	0.0636	0.0759	0.0931	8.43471	7.74545	7.14816	6.42973	5.13797	4.29619	3.97483	3.71976	3.42508	-3.17333	-0.793333	-5.00964	-0.759036	3.93237		43.1	1.305	2.902	1.172	0.43	0.19	0.31	0.49	0.93	0.93	1.32	1.55	2.03
298	TAN2206_SW-100_27-28cm	15/05/2024 10:11:58	27.5	3.07	5.11	7.92	13.3	31.9	55.5	68.5	81.2	97.9	0.00307	0.00511	0.00792	0.0133	0.0319	0.0555	0.0685	0.0812	0.0979	8.34755	7.61246	6.98028	6.23243	4.9703	4.17137	3.86775	3.62238	3.35255	-3.11253	-0.778133	-4.995	-0.756818	3.86935		47.2	0.991	2.893	1.066	0.45	0.19	0.3	0.44	0.83	0.82	1.16	1.37	1.79
299	TAN2206_SW-100_27-28cm	15/05/2024 10:12:21	27.5	3.07	5.11	7.93	13.3	32	55.6	68.6	81.4	98.2	0.00307	0.00511	0.00793	0.0133	0.032	0.0556	0.0686	0.0814	0.0982	8.34755	7.61246	6.97846	6.23243	4.96578	4.16877	3.86565	3.61883	3.34813	-3.11282	-0.778204	-4.99941	-0.757487	3.8703		47.1	0.815	2.893	1.039	0.44	0.18	0.29	0.44	0.83	0.82	1.16	1.37	1.79
300	TAN2206_SW-100_27-28cm	15/05/2024 10:12:45	27.5	3.08	5.13	7.95	13.3	32	55.6	68.7	81.5	98.1	0.00308	0.00513	0.00795	0.0133	0.032	0.0556	0.0687	0.0815	0.0981	8.34285	7.60683	6.97483	6.23243	4.96578	4.16877	3.86355	3.61706	3.3496	-3.11128	-0.777821	-4.99325	-0.756553	3.86784		47.1	0.788	2.89	1.032	0.44	0.18	0.29	0.44	0.82	0.82	1.16	1.36	1.79
301	TAN2206_SW-100_27-28cm	15/05/2024 10:13:09	27.5	3.09	5.16	8.01	13.5	32.1	55.6	68.6	81.4	98	0.00309	0.00516	0.00801	0.0135	0.0321	0.0556	0.0686	0.0814	0.098	8.33818	7.59841	6.96398	6.2109	4.96128	4.16877	3.86565	3.61883	3.35107	-3.09833	-0.774584	-4.9871	-0.755622	3.85396		47.1	0.81	2.883	1.034	0.43	0.18	0.29	0.44	0.82	0.82	1.15	1.35	1.77
302	TAN2206_SW-100_27-28cm	15/05/2024 10:13:33	27.5	3.09	5.16	8	13.4	32	55.7	68.7	81.5	98.2	0.00309	0.00516	0.008	0.0134	0.032	0.0557	0.0687	0.0815	0.0982	8.33818	7.59841	6.96578	6.22162	4.96578	4.16618	3.86355	3.61706	3.34813	-3.10224	-0.77556	-4.99004	-0.756067	3.85831		47.1	0.799	2.885	1.034	0.43	0.18	0.29	0.44	0.82	0.82	1.15	1.35	1.77
303	TAN2206_SW-100_27-28cm	15/05/2024 10:13:58	27.5	3.1	5.18	8.04	13.5	32.1	55.8	68.8	81.6	98.4	0.0031	0.00518	0.00804	0.0135	0.0321	0.0558	0.0688	0.0816	0.0984	8.33352	7.59283	6.95859	6.2109	4.96128	4.16359	3.86145	3.61529	3.3452	-3.09714	-0.774285	-4.98832	-0.755806	3.85295		47.2	1.005	2.884	1.07	0.43	0.18	0.29	0.44	0.82	0.81	1.15	1.34	1.76
304	TAN2206_SW-100_27-28cm	15/05/2024 10:14:22	27.5	3.11	5.21	8.09	13.6	32.3	55.9	69	81.8	98.7	0.00311	0.00521	0.00809	0.0136	0.0323	0.0559	0.069	0.0818	0.0987	8.32887	7.5845	6.94964	6.20025	4.95232	4.16101	3.85726	3.61176	3.34081	-3.09238	-0.773096	-4.98806	-0.755767	3.84815		47.2	0.814	2.881	1.036	0.43	0.18	0.29	0.44	0.81	0.81	1.14	1.34	1.75
305	TAN2206_SW-100_27-28cm	15/05/2024 10:14:46	27.5	3.11	5.21	8.1	13.6	32.2	55.7	68.7	81.4	98	0.00311	0.00521	0.0081	0.0136	0.0322	0.0557	0.0687	0.0814	0.098	8.32887	7.5845	6.94786	6.20025	4.9568	4.16618	3.86355	3.61883	3.35107	-3.08432	-0.771079	-4.9778	-0.754211	3.83853		47.1	0.786	2.875	1.026	0.43	0.18	0.29	0.44	0.81	0.81	1.14	1.33	1.75
306	TAN2206_SW-100_27-28cm	15/05/2024 10:15:09	27.5	3.11	5.21	8.1	13.6	32.2	55.7	68.7	81.5	98.1	0.00311	0.00521	0.0081	0.0136	0.0322	0.0557	0.0687	0.0815	0.0981	8.32887	7.5845	6.94786	6.20025	4.9568	4.16618	3.86355	3.61706	3.3496	-3.08432	-0.771079	-4.97927	-0.754434	3.83875		47	0.797	2.876	1.03	0.43	0.18	0.29	0.44	0.82	0.81	1.14	1.33	1.75
307	TAN2206_SW-100_27-28cm	15/05/2024 10:15:33	27.5	3.12	5.23	8.14	13.7	32.3	56	69.2	82.2	99.7	0.00312	0.00523	0.00814	0.0137	0.0323	0.056	0.0692	0.0822	0.0997	8.32424	7.57897	6.94076	6.18968	4.95232	4.15843	3.85308	3.60472	3.32626	-3.08767	-0.771918	-4.99798	-0.757269	3.84494		46.9	1.15	2.883	1.106	0.43	0.18	0.29	0.44	0.81	0.81	1.13	1.33	1.74
308	Average of 'TAN2206_SW-100_27-28cm'	15/05/2024 10:11:58	27.5	3.1	5.17	8.03	13.5	32.1	55.7	68.8	81.6	98.3	0.0031	0.00517	0.00803	0.0135	0.0321	0.0557	0.0688	0.0816	0.0983	8.33352	7.59562	6.96038	6.2109	4.96128	4.16618	3.86145	3.61529	3.34666	-3.09894	-0.774734	-4.98685	-0.755584	3.85452		47.1	0.879	2.884	1.048	0.43	0.18	0.29	0.44	0.82	0.81	1.15	1.35	1.77
309	TAN2206_SW-100_28-29cm	15/05/2024 10:24:08	28.5	2.98	4.91	7.58	12.6	31.2	55.8	69.5	82.9	101	0.00298	0.00491	0.00758	0.0126	0.0312	0.0558	0.0695	0.0829	0.101	8.39047	7.67006	7.04359	6.31043	5.00231	4.16359	3.84684	3.59248	3.30757	-3.19674	-0.799186	-5.0829	-0.770136	3.96688		47.8	1.183	2.947	1.139	0.44	0.19	0.3	0.47	0.88	0.88	1.23	1.44	1.87
310	TAN2206_SW-100_28-29cm	15/05/2024 10:24:31	28.5	2.97	4.9	7.55	12.6	31	55.4	69	82.4	101	0.00297	0.0049	0.00755	0.0126	0.031	0.0554	0.069	0.0824	0.101	8.39532	7.673	7.04931	6.31043	5.01159	4.17397	3.85726	3.60121	3.30757	-3.19205	-0.798012	-5.08775	-0.770871	3.96292		47.4	1.259	2.944	1.157	0.44	0.19	0.3	0.47	0.88	0.88	1.24	1.44	1.88
311	TAN2206_SW-100_28-29cm	15/05/2024 10:24:57	28.5	2.99	4.95	7.63	12.7	31.2	55.8	69.5	82.9	101	0.00299	0.00495	0.00763	0.0127	0.0312	0.0558	0.0695	0.0829	0.101	8.38564	7.65836	7.0341	6.29903	5.00231	4.16359	3.84684	3.59248	3.30757	-3.18726	-0.796815	-5.07807	-0.769404	3.95666		47.7	1.165	2.94	1.136	0.43	0.18	0.3	0.46	0.87	0.87	1.22	1.43	1.86
312	TAN2206_SW-100_28-29cm	15/05/2024 10:25:20	28.5	3.01	4.98	7.68	12.8	31.4	56.1	69.9	83.4	102	0.00301	0.00498	0.00768	0.0128	0.0314	0.0561	0.0699	0.0834	0.102	8.37602	7.64964	7.02468	6.28771	4.99309	4.15586	3.83856	3.58381	3.29336	-3.18611	-0.796529	-5.08266	-0.7701	3.95621		47.7	1.237	2.941	1.155	0.42	0.18	0.3	0.46	0.87	0.87	1.22	1.42	1.85
313	TAN2206_SW-100_28-29cm	15/05/2024 10:25:44	28.5	3	4.97	7.67	12.7	31.3	55.8	69.3	82.4	99.9	0.003	0.00497	0.00767	0.0127	0.0313	0.0558	0.0693	0.0824	0.0999	8.38082	7.65254	7.02656	6.29903	4.99769	4.16359	3.851	3.60121	3.32337	-3.17556	-0.793889	-5.05745	-0.76628	3.94184		47.9	0.816	2.929	1.061	0.43	0.18	0.3	0.46	0.87	0.87	1.22	1.42	1.85
314	TAN2206_SW-100_28-29cm	15/05/2024 10:26:07	28.5	3	4.97	7.67	12.8	31.3	55.9	69.8	83.4	102	0.003	0.00497	0.00767	0.0128	0.0313	0.0559	0.0698	0.0834	0.102	8.38082	7.65254	7.02656	6.28771	4.99769	4.16101	3.84063	3.58381	3.29336	-3.18593	-0.796482	-5.08746	-0.770828	3.95676		47.4	1.546	2.944	1.213	0.43	0.18	0.3	0.46	0.87	0.87	1.22	1.42	1.85
315	TAN2206_SW-100_28-29cm	15/05/2024 10:26:31	28.5	3.01	4.99	7.71	12.8	31.4	56	69.6	82.9	101	0.00301	0.00499	0.00771	0.0128	0.0314	0.056	0.0696	0.0829	0.101	8.37602	7.64674	7.01905	6.28771	4.99309	4.15843	3.84477	3.59248	3.30757	-3.17428	-0.793571	-5.06845	-0.767947	3.94223		47.8	1.148	2.933	1.129	0.42	0.18	0.3	0.46	0.87	0.86	1.21	1.41	1.84
316	TAN2206_SW-100_28-29cm	15/05/2024 10:26:54	28.5	3.02	5.01	7.75	12.9	31.5	56.4	70.3	84	103	0.00302	0.00501	0.00775	0.0129	0.0315	0.0564	0.0703	0.084	0.103	8.37124	7.64097	7.01159	6.27649	4.9885	4.14816	3.83033	3.57347	3.27928	-3.18126	-0.795314	-5.09195	-0.771508	3.95276		47.7	1.53	2.944	1.209	0.42	0.18	0.3	0.46	0.86	0.86	1.21	1.4	1.83
317	TAN2206_SW-100_28-29cm	15/05/2024 10:27:19	28.5	3.01	5.01	7.74	12.9	31.4	56	69.6	83	101	0.00301	0.00501	0.00774	0.0129	0.0314	0.056	0.0696	0.083	0.101	8.37602	7.64097	7.01345	6.27649	4.99309	4.15843	3.84477	3.59074	3.30757	-3.16868	-0.79217	-5.06845	-0.767947	3.93663		47.6	1.189	2.931	1.139	0.42	0.18	0.3	0.46	0.87	0.86	1.21	1.4	1.83
318	TAN2206_SW-100_28-29cm	15/05/2024 10:27:42	28.5	3.01	5.01	7.75	12.9	31.5	56	69.7	83.1	101	0.00301	0.00501	0.00775	0.0129	0.0315	0.056	0.0697	0.0831	0.101	8.37602	7.64097	7.01159	6.27649	4.9885	4.15843	3.8427	3.58901	3.30757	-3.16889	-0.792223	-5.06845	-0.767947	3.93684		47.7	1.194	2.932	1.14	0.42	0.18	0.3	0.46	0.87	0.86	1.21	1.4	1.82
319	Average of 'TAN2206_SW-100_28-29cm'	15/05/2024 10:24:08	28.5	3	4.97	7.67	12.8	31.3	55.9	69.6	83	101	0.003	0.00497	0.00767	0.0128	0.0313	0.0559	0.0696	0.083	0.101	8.38082	7.65254	7.02656	6.28771	4.99769	4.16101	3.84477	3.59074	3.30757	-3.18179	-0.795447	-5.07325	-0.768674	3.95046		47.7	1.238	2.939	1.149	0.43	0.18	0.3	0.46	0.87	0.87	1.22	1.42	1.85
320	TAN2206_SW-100_29-30cm	15/05/2024 10:35:06	29.5	2.93	4.82	7.43	12.4	30.1	53.2	66.1	78.8	95.9	0.00293	0.00482	0.00743	0.0124	0.0301	0.0532	0.0661	0.0788	0.0959	8.41488	7.69675	7.07242	6.33352	5.05409	4.23243	3.91921	3.66566	3.38233	-3.15322	-0.788304	-5.03256	-0.762509	3.91572		44.9	1.014	2.913	1.102	0.49	0.2	0.32	0.48	0.89	0.89	1.25	1.47	1.92
321	TAN2206_SW-100_29-30cm	15/05/2024 10:35:31	29.5	2.93	4.82	7.44	12.4	30.1	53.2	66	78.7	95.9	0.00293	0.00482	0.00744	0.0124	0.0301	0.0532	0.066	0.0787	0.0959	8.41488	7.69675	7.07048	6.33352	5.05409	4.23243	3.92139	3.66749	3.38233	-3.14909	-0.787273	-5.03256	-0.762509	3.9116		44.9	1.255	2.911	1.144	0.48	0.2	0.32	0.48	0.89	0.89	1.25	1.47	1.92
322	TAN2206_SW-100_29-30cm	15/05/2024 10:35:55	29.5	2.95	4.86	7.51	12.6	30.3	53.6	66.6	79.6	97	0.00295	0.00486	0.00751	0.0126	0.0303	0.0536	0.0666	0.0796	0.097	8.40507	7.68483	7.05697	6.31043	5.04454	4.22162	3.90833	3.65109	3.36587	-3.14864	-0.787159	-5.0392	-0.763515	3.91215		45	1.361	2.914	1.171	0.47	0.19	0.31	0.47	0.88	0.88	1.24	1.45	1.9
323	TAN2206_SW-100_29-30cm	15/05/2024 10:36:18	29.5	2.96	4.87	7.52	12.6	30.3	53.4	66.2	78.9	96	0.00296	0.00487	0.00752	0.0126	0.0303	0.0534	0.0662	0.0789	0.096	8.40019	7.68186	7.05505	6.31043	5.04454	4.22702	3.91702	3.66383	3.38082	-3.13803	-0.784507	-5.01937	-0.76051	3.89854		45	1.225	2.904	1.135	0.47	0.19	0.31	0.47	0.88	0.88	1.24	1.45	1.89
324	TAN2206_SW-100_29-30cm	15/05/2024 10:36:42	29.5	2.97	4.9	7.57	12.6	30.4	53.5	66.4	79.2	96.3	0.00297	0.0049	0.00757	0.0126	0.0304	0.0535	0.0664	0.0792	0.0963	8.39532	7.673	7.04549	6.31043	5.03978	4.22432	3.91267	3.65836	3.37632	-3.13282	-0.783205	-5.019	-0.760455	3.89327		45	0.995	2.901	1.096	0.46	0.19	0.31	0.47	0.88	0.87	1.23	1.44	1.88
325	TAN2206_SW-100_29-30cm	15/05/2024 10:37:07	29.5	2.97	4.92	7.6	12.7	30.5	53.8	66.7	79.9	97.5	0.00297	0.00492	0.0076	0.0127	0.0305	0.0538	0.0667	0.0799	0.0975	8.39532	7.66713	7.03978	6.29903	5.03505	4.21625	3.90617	3.64566	3.35845	-3.13362	-0.783404	-5.03687	-0.763162	3.89678		45	1.456	2.909	1.19	0.46	0.19	0.31	0.47	0.87	0.87	1.22	1.43	1.87
326	TAN2206_SW-100_29-30cm	15/05/2024 10:37:32	29.5	2.98	4.92	7.62	12.7	30.5	53.7	66.6	79.6	97	0.00298	0.00492	0.00762	0.0127	0.0305	0.0537	0.0666	0.0796	0.097	8.39047	7.66713	7.03599	6.29903	5.03505	4.21893	3.90833	3.65109	3.36587	-3.12766	-0.781915	-5.0246	-0.761303	3.88896		45	1.345	2.903	1.164	0.46	0.19	0.31	0.47	0.87	0.87	1.22	1.43	1.86
327	TAN2206_SW-100_29-30cm	15/05/2024 10:37:57	29.5	2.97	4.91	7.59	12.7	30.4	53.4	66.2	78.9	96	0.00297	0.00491	0.00759	0.0127	0.0304	0.0534	0.0662	0.0789	0.096	8.39532	7.67006	7.04168	6.29903	5.03978	4.22702	3.91702	3.66383	3.38082	-3.12466	-0.781165	-5.0145	-0.759773	3.88443		45	0.983	2.896	1.092	0.46	0.19	0.31	0.47	0.88	0.87	1.22	1.43	1.87
328	TAN2206_SW-100_29-30cm	15/05/2024 10:38:20	29.5	2.98	4.93	7.62	12.7	30.4	53.5	66.4	79.2	96.6	0.00298	0.00493	0.00762	0.0127	0.0304	0.0535	0.0664	0.0792	0.0966	8.39047	7.6642	7.03599	6.29903	5.03978	4.22432	3.91267	3.65836	3.37183	-3.12332	-0.78083	-5.01864	-0.7604	3.88372		44.9	1.351	2.899	1.163	0.46	0.19	0.31	0.47	0.87	0.87	1.22	1.43	1.86
329	TAN2206_SW-100_29-30cm	15/05/2024 10:38:44	29.5	2.98	4.93	7.63	12.7	30.5	53.6	66.5	79.4	96.7	0.00298	0.00493	0.00763	0.0127	0.0305	0.0536	0.0665	0.0794	0.0967	8.39047	7.6642	7.0341	6.29903	5.03505	4.22162	3.9105	3.65472	3.37034	-3.1236	-0.7809	-5.02013	-0.760626	3.88423		45	1.323	2.9	1.158	0.46	0.19	0.31	0.47	0.87	0.87	1.22	1.43	1.86
330	Average of 'TAN2206_SW-100_29-30cm'	15/05/2024 10:35:06	29.5	2.96	4.89	7.55	12.6	30.3	53.5	66.4	79.2	96.5	0.00296	0.00489	0.00755	0.0126	0.0303	0.0535	0.0664	0.0792	0.0965	8.40019	7.67595	7.04931	6.31043	5.04454	4.22432	3.91267	3.65836	3.37333	-3.13663	-0.784159	-5.02686	-0.761645	3.89828		45	1.239	2.905	1.143	0.47	0.19	0.31	0.47	0.88	0.88	1.23	1.44	1.88
331	TAN2206_SW-100_30-31cm	15/05/2024 10:47:50	30.5	3.59	6.17	9.95	17.4	38.8	64.7	79.1	93.2	112	0.00359	0.00617	0.00995	0.0174	0.0388	0.0647	0.0791	0.0932	0.112	8.1218	7.34051	6.65109	5.84477	4.6878	3.95009	3.66018	3.42353	3.15843	-2.99091	-0.747727	-4.96337	-0.752026	3.74294		53.5	0.724	2.839	0.973	0.25	0.13	0.22	0.35	0.67	0.68	0.95	1.11	1.46
332	TAN2206_SW-100_30-31cm	15/05/2024 10:48:14	30.5	3.59	6.16	9.94	17.3	38.8	64.9	79.5	93.9	113	0.00359	0.00616	0.00994	0.0173	0.0388	0.0649	0.0795	0.0939	0.113	8.1218	7.34285	6.65254	5.85308	4.6878	3.94564	3.6529	3.41273	3.14561	-2.99964	-0.749909	-4.9762	-0.753969	3.75361		53.4	1.055	2.85	1.048	0.25	0.13	0.22	0.35	0.67	0.68	0.95	1.12	1.46
333	TAN2206_SW-100_30-31cm	15/05/2024 10:48:38	30.5	3.59	6.17	9.94	17.3	38.7	64.6	78.8	92.7	111	0.00359	0.00617	0.00994	0.0173	0.0387	0.0646	0.0788	0.0927	0.111	8.1218	7.34051	6.65254	5.85308	4.69152	3.95232	3.66566	3.43129	3.17137	-2.98688	-0.746719	-4.95043	-0.750065	3.73694		53.8	0.48	2.833	0.911	0.25	0.13	0.22	0.35	0.67	0.68	0.95	1.11	1.46
334	TAN2206_SW-100_30-31cm	15/05/2024 10:49:01	30.5	3.6	6.19	9.98	17.3	38.8	65	79.7	93.9	113	0.0036	0.00619	0.00998	0.0173	0.0388	0.065	0.0797	0.0939	0.113	8.11779	7.33584	6.64674	5.85308	4.6878	3.94342	3.64928	3.41273	3.14561	-2.99747	-0.749367	-4.97218	-0.753361	3.75083		53.8	0.708	2.844	0.976	0.25	0.13	0.22	0.35	0.67	0.67	0.95	1.11	1.45
335	TAN2206_SW-100_30-31cm	15/05/2024 10:49:27	30.5	3.61	6.21	10	17.4	38.9	64.9	79.4	93.5	112	0.00361	0.00621	0.01	0.0174	0.0389	0.0649	0.0794	0.0935	0.112	8.11379	7.33119	6.64386	5.84477	4.68409	3.94564	3.65472	3.41889	3.15843	-2.98914	-0.747285	-4.95536	-0.750812	3.73995		53.7	0.723	2.839	0.974	0.25	0.13	0.22	0.35	0.67	0.67	0.95	1.1	1.45
336	TAN2206_SW-100_30-31cm	15/05/2024 10:49:50	30.5	3.63	6.27	10.1	17.6	39.1	65.3	80	94.5	114	0.00363	0.00627	0.0101	0.0176	0.0391	0.0653	0.08	0.0945	0.114	8.10581	7.31732	6.6295	5.82828	4.67669	3.93677	3.64386	3.40354	3.13289	-2.98564	-0.746411	-4.97292	-0.753473	3.73912		53.6	1.093	2.843	1.056	0.25	0.13	0.22	0.34	0.66	0.67	0.94	1.09	1.43
337	TAN2206_SW-100_30-31cm	15/05/2024 10:50:15	30.5	3.61	6.24	10.1	17.4	38.9	65	79.6	93.9	113	0.00361	0.00624	0.0101	0.0174	0.0389	0.065	0.0796	0.0939	0.113	8.11379	7.32424	6.6295	5.84477	4.68409	3.94342	3.65109	3.41273	3.14561	-2.97841	-0.744603	-4.96818	-0.752755	3.73117		53.6	0.744	2.84	0.985	0.25	0.13	0.22	0.35	0.67	0.67	0.94	1.1	1.44
338	TAN2206_SW-100_30-31cm	15/05/2024 10:50:38	30.5	3.62	6.27	10.1	17.6	39	65	79.5	93.7	113	0.00362	0.00627	0.0101	0.0176	0.039	0.065	0.0795	0.0937	0.113	8.10979	7.31732	6.6295	5.82828	4.68038	3.94342	3.6529	3.41581	3.14561	-2.9766	-0.74415	-4.96419	-0.75215	3.72875		53.6	0.719	2.834	0.974	0.25	0.13	0.22	0.35	0.66	0.67	0.94	1.09	1.43
339	TAN2206_SW-100_30-31cm	15/05/2024 10:51:04	30.5	3.61	6.25	10.1	17.5	38.8	64.5	78.7	92.6	111	0.00361	0.00625	0.0101	0.0175	0.0388	0.0645	0.0787	0.0926	0.111	8.11379	7.32193	6.6295	5.8365	4.6878	3.95456	3.66749	3.43284	3.17137	-2.96201	-0.740502	-4.94242	-0.748851	3.71086		53.6	0.491	2.823	0.912	0.25	0.14	0.22	0.35	0.67	0.67	0.94	1.1	1.43
340	TAN2206_SW-100_30-31cm	15/05/2024 10:51:27	30.5	3.61	6.25	10.1	17.5	38.9	64.9	79.4	93.5	112	0.00361	0.00625	0.0101	0.0175	0.0389	0.0649	0.0794	0.0935	0.112	8.11379	7.32193	6.6295	5.8365	4.68409	3.94564	3.65472	3.41889	3.15843	-2.97478	-0.743696	-4.95536	-0.750812	3.7256		53.7	0.701	2.834	0.967	0.25	0.13	0.22	0.35	0.67	0.67	0.94	1.1	1.43
341	Average of 'TAN2206_SW-100_30-31cm'	15/05/2024 10:47:50	30.5	3.61	6.22	10	17.4	38.9	64.9	79.4	93.5	112	0.00361	0.00622	0.01	0.0174	0.0389	0.0649	0.0794	0.0935	0.112	8.11379	7.32887	6.64386	5.84477	4.68409	3.94564	3.65472	3.41889	3.15843	-2.98914	-0.747285	-4.95536	-0.750812	3.73995		53.6	0.758	2.838	0.98	0.25	0.13	0.22	0.35	0.67	0.67	0.95	1.1	1.44
342	TAN2206_SW-100_31-32cm	15/05/2024 10:58:59	31.5	3.08	5.17	8.11	13.8	33.1	57.9	71.8	85.3	104	0.00308	0.00517	0.00811	0.0138	0.0331	0.0579	0.0718	0.0853	0.104	8.34285	7.59562	6.94608	6.17919	4.91702	4.11029	3.79987	3.55131	3.26534	-3.14621	-0.786553	-5.07751	-0.76932	3.91553		48.4	1.094	2.928	1.105	0.43	0.18	0.29	0.44	0.83	0.83	1.16	1.36	1.77
343	TAN2206_SW-100_31-32cm	15/05/2024 10:59:23	31.5	3.1	5.19	8.15	13.9	33.3	58.3	72.3	85.9	105	0.0031	0.00519	0.00815	0.0139	0.0333	0.0583	0.0723	0.0859	0.105	8.33352	7.59005	6.93898	6.16877	4.90833	4.10036	3.78986	3.5412	3.25154	-3.14912	-0.787281	-5.08198	-0.769997	3.91912		48.7	1.334	2.934	1.151	0.42	0.18	0.29	0.44	0.82	0.82	1.16	1.35	1.76
344	TAN2206_SW-100_31-32cm	15/05/2024 10:59:46	31.5	3.12	5.25	8.25	14.1	33.6	58.5	72.4	85.9	105	0.00312	0.00525	0.00825	0.0141	0.0336	0.0585	0.0724	0.0859	0.105	8.32424	7.57347	6.92139	6.14816	4.89539	4.09542	3.78787	3.5412	3.25154	-3.13352	-0.783381	-5.0727	-0.768591	3.90211		48.9	1.057	2.922	1.093	0.41	0.18	0.28	0.43	0.81	0.81	1.14	1.33	1.73
345	TAN2206_SW-100_31-32cm	15/05/2024 11:00:12	31.5	3.13	5.26	8.25	14.1	33.5	58.4	72.3	85.8	105	0.00313	0.00526	0.00825	0.0141	0.0335	0.0584	0.0723	0.0858	0.105	8.31962	7.57072	6.92139	6.14816	4.8997	4.09789	3.78986	3.54288	3.25154	-3.13153	-0.782882	-5.06808	-0.767891	3.89942		48.8	1.049	2.919	1.092	0.41	0.17	0.28	0.43	0.81	0.81	1.14	1.33	1.73
346	TAN2206_SW-100_31-32cm	15/05/2024 11:00:35	31.5	3.14	5.28	8.31	14.2	33.7	58.6	72.6	86.1	105	0.00314	0.00528	0.00831	0.0142	0.0337	0.0586	0.0726	0.0861	0.105	8.31502	7.56525	6.91094	6.13797	4.89111	4.09296	3.78389	3.53784	3.25154	-3.12705	-0.781762	-5.06348	-0.767194	3.89424		49	1.039	2.917	1.089	0.4	0.17	0.28	0.43	0.81	0.81	1.13	1.32	1.72
347	TAN2206_SW-100_31-32cm	15/05/2024 11:00:59	31.5	3.14	5.29	8.31	14.2	33.7	58.6	72.7	86.3	106	0.00314	0.00529	0.00831	0.0142	0.0337	0.0586	0.0727	0.0863	0.106	8.31502	7.56252	6.91094	6.13797	4.89111	4.09296	3.7819	3.5345	3.23786	-3.12903	-0.782259	-5.07716	-0.769266	3.8983		48.9	1.293	2.922	1.138	0.41	0.18	0.28	0.43	0.81	0.81	1.13	1.32	1.72
348	TAN2206_SW-100_31-32cm	15/05/2024 11:01:24	31.5	3.14	5.3	8.33	14.2	33.7	58.5	72.6	86.1	105	0.00314	0.0053	0.00833	0.0142	0.0337	0.0585	0.0726	0.0861	0.105	8.31502	7.55979	6.90747	6.13797	4.89111	4.09542	3.78389	3.53784	3.25154	-3.12358	-0.780895	-5.06348	-0.767194	3.89078		48.8	1.294	2.918	1.137	0.41	0.17	0.28	0.43	0.81	0.8	1.13	1.32	1.71
349	TAN2206_SW-100_31-32cm	15/05/2024 11:01:48	31.5	3.15	5.32	8.38	14.3	33.8	58.8	72.9	86.5	106	0.00315	0.00532	0.00838	0.0143	0.0338	0.0588	0.0729	0.0865	0.106	8.31043	7.55436	6.89883	6.12784	4.88683	4.08804	3.77794	3.53116	3.23786	-3.1209	-0.780224	-5.07257	-0.768571	3.88947		48.8	1.311	2.919	1.143	0.41	0.17	0.28	0.43	0.8	0.8	1.12	1.31	1.7
350	TAN2206_SW-100_31-32cm	15/05/2024 11:02:13	31.5	3.15	5.31	8.36	14.2	33.7	58.5	72.4	85.7	104	0.00315	0.00531	0.00836	0.0142	0.0337	0.0585	0.0724	0.0857	0.104	8.31043	7.55707	6.90228	6.13797	4.89111	4.09542	3.78787	3.54456	3.26534	-3.11441	-0.778604	-5.04509	-0.764407	3.87882		48.9	1.041	2.91	1.085	0.41	0.18	0.28	0.43	0.81	0.8	1.12	1.31	1.7
351	TAN2206_SW-100_31-32cm	15/05/2024 11:02:37	31.5	3.17	5.34	8.4	14.3	33.8	58.7	72.7	86.3	105	0.00317	0.00534	0.0084	0.0143	0.0338	0.0587	0.0727	0.0863	0.105	8.3013	7.54894	6.89539	6.12784	4.88683	4.0905	3.7819	3.5345	3.25154	-3.11349	-0.778374	-5.04976	-0.765116	3.87861		48.8	1.274	2.905	1.133	0.34	0.17	0.28	0.43	0.81	0.8	1.13	1.31	1.7
352	Average of 'TAN2206_SW-100_31-32cm'	15/05/2024 10:58:59	31.5	3.13	5.27	8.28	14.1	33.6	58.5	72.5	86	105	0.00313	0.00527	0.00828	0.0141	0.0336	0.0585	0.0725	0.086	0.105	8.31962	7.56798	6.91615	6.14816	4.89539	4.09542	3.78588	3.53952	3.25154	-3.13028	-0.78257	-5.06808	-0.767891	3.89817		48.8	1.183	2.919	1.117	0.4	0.18	0.28	0.43	0.81	0.81	1.14	1.33	1.72
353	TAN2206_SW-100_32-33cm	15/05/2024 11:10:59	32.5	4.1	7.45	12.6	21.8	43.8	69.6	83.5	96.8	114	0.0041	0.00745	0.0126	0.0218	0.0438	0.0696	0.0835	0.0968	0.114	7.93016	7.06854	6.31043	5.51953	4.51293	3.84477	3.58208	3.36885	3.13289	-2.72835	-0.682088	-4.79727	-0.726859	3.45521		57.4	0.176	2.727	0.761	0.25	0.13	0.2	0.3	0.56	0.55	0.78	0.9	1.18
354	TAN2206_SW-100_32-33cm	15/05/2024 11:11:24	32.5	4.13	7.51	12.8	22	44	69.9	84	97.4	116	0.00413	0.00751	0.0128	0.022	0.044	0.0699	0.084	0.0974	0.116	7.91964	7.05697	6.28771	5.50635	4.50635	3.83856	3.57347	3.35993	3.1078	-2.71425	-0.678561	-4.81184	-0.729067	3.44331		57.3	0.248	2.727	0.784	0.25	0.13	0.2	0.29	0.55	0.55	0.77	0.89	1.16
355	TAN2206_SW-100_32-33cm	15/05/2024 11:11:49	32.5	4.15	7.55	12.8	22.1	43.9	69.5	83.4	96.5	114	0.00415	0.00755	0.0128	0.0221	0.0439	0.0695	0.0834	0.0965	0.114	7.91267	7.04931	6.28771	5.49981	4.50964	3.84684	3.58381	3.37333	3.13289	-2.7039	-0.675976	-4.77978	-0.724209	3.42811		57.3	0.16	2.714	0.751	0.24	0.13	0.2	0.29	0.55	0.54	0.76	0.89	1.16
356	TAN2206_SW-100_32-33cm	15/05/2024 11:12:13	32.5	4.13	7.51	12.7	21.9	43.8	69.5	83.4	96.6	114	0.00413	0.00751	0.0127	0.0219	0.0438	0.0695	0.0834	0.0966	0.114	7.91964	7.05697	6.29903	5.51293	4.51293	3.84684	3.58381	3.37183	3.13289	-2.71522	-0.678805	-4.78675	-0.725265	3.44048		57.4	0.159	2.719	0.755	0.25	0.13	0.2	0.3	0.55	0.55	0.77	0.89	1.16
357	TAN2206_SW-100_32-33cm	15/05/2024 11:12:36	32.5	4.17	7.61	12.9	22.2	44.1	69.8	83.7	97	115	0.00417	0.00761	0.0129	0.0222	0.0441	0.0698	0.0837	0.097	0.115	7.90574	7.03789	6.27649	5.4933	4.50308	3.84063	3.57863	3.36587	3.12029	-2.69786	-0.674464	-4.78544	-0.725067	3.42292		57.4	0.177	2.712	0.757	0.24	0.13	0.2	0.29	0.55	0.54	0.76	0.88	1.14
358	TAN2206_SW-100_32-33cm	15/05/2024 11:13:00	32.5	4.17	7.6	12.9	22.1	44	69.6	83.5	96.7	114	0.00417	0.0076	0.0129	0.0221	0.044	0.0696	0.0835	0.0967	0.114	7.90574	7.03978	6.27649	5.49981	4.50635	3.84477	3.58208	3.37034	3.13289	-2.69441	-0.673601	-4.77284	-0.723158	3.41756		57.2	0.183	2.712	0.76	0.24	0.13	0.2	0.29	0.55	0.54	0.76	0.88	1.15
359	TAN2206_SW-100_32-33cm	15/05/2024 11:13:23	32.5	4.17	7.62	12.9	22.1	44	69.8	83.8	97.1	115	0.00417	0.00762	0.0129	0.0221	0.044	0.0698	0.0838	0.0971	0.115	7.90574	7.03599	6.27649	5.49981	4.50635	3.84063	3.57691	3.36438	3.12029	-2.69958	-0.674895	-4.78544	-0.725067	3.42465		57.4	0.201	2.714	0.768	0.24	0.13	0.2	0.29	0.55	0.54	0.76	0.88	1.14
360	TAN2206_SW-100_32-33cm	15/05/2024 11:13:47	32.5	4.19	7.65	13	22.3	44.1	69.6	83.5	96.6	114	0.00419	0.00765	0.013	0.0223	0.0441	0.0696	0.0835	0.0966	0.114	7.89883	7.03032	6.26534	5.48681	4.50308	3.84477	3.58208	3.37183	3.13289	-2.68326	-0.670816	-4.76594	-0.722112	3.40538		57.4	0.152	2.706	0.747	0.24	0.13	0.2	0.29	0.54	0.54	0.75	0.87	1.14
361	TAN2206_SW-100_32-33cm	15/05/2024 11:14:11	32.5	4.18	7.64	13	22.2	44	69.5	83.4	96.5	114	0.00418	0.00764	0.013	0.0222	0.044	0.0695	0.0834	0.0965	0.114	7.90228	7.03221	6.26534	5.4933	4.50635	3.84684	3.58381	3.37333	3.13289	-2.68154	-0.670384	-4.76939	-0.722634	3.40417		57.3	0.146	2.706	0.747	0.24	0.13	0.2	0.29	0.54	0.54	0.75	0.87	1.14
362	TAN2206_SW-100_32-33cm	15/05/2024 11:14:34	32.5	4.21	7.73	13.2	22.5	44.3	70.1	84.1	97.4	115	0.00421	0.00773	0.0132	0.0225	0.0443	0.0701	0.0841	0.0974	0.115	7.89196	7.01532	6.24332	5.47393	4.49655	3.83444	3.57175	3.35993	3.12029	-2.67157	-0.667892	-4.77167	-0.72298	3.39455		57.4	0.217	2.706	0.769	0.24	0.13	0.2	0.29	0.54	0.53	0.75	0.86	1.12
363	Average of 'TAN2206_SW-100_32-33cm'	15/05/2024 11:10:59	32.5	4.16	7.59	12.9	22.1	44	69.7	83.6	96.9	115	0.00416	0.00759	0.0129	0.0221	0.044	0.0697	0.0836	0.0969	0.115	7.9092	7.04168	6.27649	5.49981	4.50635	3.8427	3.58035	3.36736	3.12029	-2.69613	-0.674033	-4.78891	-0.725592	3.42172		57.3	0.183	2.714	0.76	0.24	0.13	0.2	0.29	0.55	0.54	0.76	0.88	1.15
364	TAN2206_SW-100_33-34cm	15/05/2024 11:23:07	33.5	5.4	10.7	18.9	28.6	49.4	74.4	88	101	118	0.0054	0.0107	0.0189	0.0286	0.0494	0.0744	0.088	0.101	0.118	7.53282	6.54625	5.72547	5.12784	4.33935	3.74855	3.50635	3.30757	3.08314	-2.21912	-0.554779	-4.44968	-0.674194	2.89331		59.8	0.099	2.507	0.658	0.16	0.11	0.16	0.23	0.41	0.4	0.55	0.63	0.81
365	TAN2206_SW-100_33-34cm	15/05/2024 11:23:31	33.5	5.42	10.7	18.9	28.6	49.4	74.4	88	101	118	0.00542	0.0107	0.0189	0.0286	0.0494	0.0744	0.088	0.101	0.118	7.52749	6.54625	5.72547	5.12784	4.33935	3.74855	3.50635	3.30757	3.08314	-2.21912	-0.554779	-4.44435	-0.673386	2.8925		59.8	0.077	2.505	0.65	0.16	0.11	0.16	0.23	0.41	0.4	0.55	0.62	0.81
366	TAN2206_SW-100_33-34cm	15/05/2024 11:23:54	33.5	5.44	10.7	18.9	28.6	49.4	74.4	88	101	118	0.00544	0.0107	0.0189	0.0286	0.0494	0.0744	0.088	0.101	0.118	7.52218	6.54625	5.72547	5.12784	4.33935	3.74855	3.50635	3.30757	3.08314	-2.21912	-0.554779	-4.43904	-0.672581	2.8917		59.7	0.09	2.503	0.655	0.16	0.11	0.16	0.23	0.4	0.4	0.55	0.62	0.81
367	TAN2206_SW-100_33-34cm	15/05/2024 11:24:18	33.5	5.5	10.9	19.1	28.8	49.6	74.6	88.2	101	119	0.0055	0.0109	0.0191	0.0288	0.0496	0.0746	0.0882	0.101	0.119	7.50635	6.51953	5.71028	5.11779	4.33352	3.74468	3.50308	3.30757	3.07097	-2.20721	-0.551802	-4.43539	-0.672028	2.87923		59.9	0.09	2.496	0.653	0.15	0.11	0.16	0.22	0.4	0.39	0.54	0.61	0.79
368	TAN2206_SW-100_33-34cm	15/05/2024 11:24:41	33.5	5.48	10.9	19	28.8	49.6	74.5	88.1	101	118	0.00548	0.0109	0.019	0.0288	0.0496	0.0745	0.0881	0.101	0.118	7.51161	6.51953	5.71786	5.11779	4.33352	3.74662	3.50471	3.30757	3.08314	-2.21314	-0.553286	-4.42847	-0.67098	2.88412		59.9	0.071	2.498	0.647	0.15	0.11	0.16	0.22	0.4	0.39	0.54	0.62	0.8
369	TAN2206_SW-100_33-34cm	15/05/2024 11:25:05	33.5	5.5	10.9	19.1	28.8	49.6	74.6	88.3	101	119	0.0055	0.0109	0.0191	0.0288	0.0496	0.0746	0.0883	0.101	0.119	7.50635	6.51953	5.71028	5.11779	4.33352	3.74468	3.50144	3.30757	3.07097	-2.20884	-0.55221	-4.43539	-0.672028	2.88087		60	0.082	2.496	0.651	0.15	0.11	0.16	0.22	0.4	0.39	0.54	0.61	0.79
370	TAN2206_SW-100_33-34cm	15/05/2024 11:25:28	33.5	5.55	11	19.3	29	49.8	74.9	88.7	102	120	0.00555	0.011	0.0193	0.029	0.0498	0.0749	0.0887	0.102	0.12	7.4933	6.50635	5.69526	5.1078	4.32771	3.73889	3.49492	3.29336	3.05889	-2.20033	-0.550083	-4.4344	-0.671879	2.87221		59.9	0.136	2.495	0.672	0.15	0.11	0.16	0.22	0.4	0.39	0.53	0.61	0.78
371	TAN2206_SW-100_33-34cm	15/05/2024 11:25:52	33.5	5.55	11	19.2	29	49.8	74.7	88.2	101	118	0.00555	0.011	0.0192	0.029	0.0498	0.0747	0.0882	0.101	0.118	7.4933	6.50635	5.70275	5.1078	4.32771	3.74275	3.50308	3.30757	3.08314	-2.19967	-0.549918	-4.41016	-0.668205	2.86788		60.2	0.052	2.49	0.638	0.15	0.11	0.16	0.22	0.4	0.39	0.53	0.61	0.78
372	TAN2206_SW-100_33-34cm	15/05/2024 11:26:16	33.5	5.51	10.9	19.1	28.8	49.5	74.4	88	101	118	0.00551	0.0109	0.0191	0.0288	0.0495	0.0744	0.088	0.101	0.118	7.50373	6.51953	5.71028	5.11779	4.33643	3.74855	3.50635	3.30757	3.08314	-2.20393	-0.550983	-4.42059	-0.669786	2.87372		59.7	0.099	2.493	0.656	0.15	0.11	0.16	0.22	0.4	0.39	0.54	0.61	0.79
373	TAN2206_SW-100_33-34cm	15/05/2024 11:26:41	33.5	5.54	11	19.2	28.9	49.7	74.6	88.3	101	119	0.00554	0.011	0.0192	0.0289	0.0497	0.0746	0.0883	0.101	0.119	7.4959	6.50635	5.70275	5.11279	4.33061	3.74468	3.50144	3.30757	3.07097	-2.20131	-0.550327	-4.42493	-0.670444	2.87175		59.9	0.087	2.493	0.652	0.15	0.11	0.16	0.22	0.4	0.39	0.53	0.61	0.78
374	Average of 'TAN2206_SW-100_33-34cm'	15/05/2024 11:23:07	33.5	5.49	10.9	19.1	28.8	49.6	74.5	88.2	101	118	0.00549	0.0109	0.0191	0.0288	0.0496	0.0745	0.0882	0.101	0.118	7.50898	6.51953	5.71028	5.11779	4.33352	3.74662	3.50308	3.30757	3.08314	-2.20721	-0.551802	-4.42584	-0.670581	2.87779		59.9	0.089	2.498	0.653	0.15	0.11	0.16	0.22	0.4	0.39	0.54	0.61	0.8
375	TAN2206_SW-100_34-35cm	15/05/2024 11:34:53	34.5	7.34	15.9	24.6	33.3	53.1	77.7	91.3	104	121	0.00734	0.0159	0.0246	0.0333	0.0531	0.0777	0.0913	0.104	0.121	7.09	5.97483	5.3452	4.90833	4.23514	3.68594	3.45324	3.26534	3.04692	-1.89196	-0.472989	-4.04308	-0.612588	2.50454		61.1	0.121	2.306	0.624	0.07	0.08	0.12	0.17	0.3	0.29	0.39	0.44	0.56
376	TAN2206_SW-100_34-35cm	15/05/2024 11:35:17	34.5	7.37	15.9	24.6	33.3	53.2	77.8	91.4	104	121	0.00737	0.0159	0.0246	0.0333	0.0532	0.0778	0.0914	0.104	0.121	7.08412	5.97483	5.3452	4.90833	4.23243	3.68409	3.45166	3.26534	3.04692	-1.89354	-0.473384	-4.0372	-0.611697	2.50523		61.2	0.117	2.306	0.623	0.07	0.08	0.12	0.17	0.3	0.29	0.39	0.44	0.56
377	TAN2206_SW-100_34-35cm	15/05/2024 11:35:41	34.5	7.42	16	24.7	33.4	53.3	78	91.6	105	121	0.00742	0.016	0.0247	0.0334	0.0533	0.078	0.0916	0.105	0.121	7.07437	5.96578	5.33935	4.90401	4.22972	3.68038	3.44851	3.25154	3.04692	-1.89084	-0.472709	-4.02744	-0.610219	2.50106		61.3	0.113	2.303	0.62	0.07	0.08	0.12	0.17	0.3	0.29	0.39	0.43	0.55
378	TAN2206_SW-100_34-35cm	15/05/2024 11:36:06	34.5	7.43	16	24.7	33.4	53.3	78	91.7	105	122	0.00743	0.016	0.0247	0.0334	0.0533	0.078	0.0917	0.105	0.122	7.07242	5.96578	5.33935	4.90401	4.22972	3.68038	3.44693	3.25154	3.03505	-1.89241	-0.473103	-4.03738	-0.611724	2.50413		61.3	0.119	2.304	0.626	0.07	0.08	0.12	0.17	0.3	0.29	0.39	0.43	0.55
379	TAN2206_SW-100_34-35cm	15/05/2024 11:36:30	34.5	7.43	16.1	24.7	33.4	53.3	77.9	91.5	104	121	0.00743	0.0161	0.0247	0.0334	0.0533	0.0779	0.0915	0.104	0.121	7.07242	5.9568	5.33935	4.90401	4.22972	3.68223	3.45008	3.26534	3.04692	-1.88926	-0.472315	-4.0255	-0.609924	2.49919		61.2	0.12	2.302	0.624	0.07	0.09	0.12	0.17	0.3	0.29	0.39	0.43	0.55
380	TAN2206_SW-100_34-35cm	15/05/2024 11:36:55	34.5	7.45	16.1	24.8	33.4	53.3	77.9	91.5	104	121	0.00745	0.0161	0.0248	0.0334	0.0533	0.0779	0.0915	0.104	0.121	7.06854	5.9568	5.33352	4.90401	4.22972	3.68223	3.45008	3.26534	3.04692	-1.88343	-0.470858	-4.02162	-0.609337	2.49277		61.3	0.114	2.301	0.62	0.07	0.09	0.12	0.17	0.3	0.29	0.39	0.43	0.55
381	TAN2206_SW-100_34-35cm	15/05/2024 11:37:20	34.5	7.49	16.2	24.8	33.5	53.3	77.9	91.4	104	121	0.00749	0.0162	0.0248	0.0335	0.0533	0.0779	0.0914	0.104	0.121	7.06082	5.94786	5.33352	4.8997	4.22972	3.68223	3.45166	3.26534	3.04692	-1.88185	-0.470464	-4.0139	-0.608166	2.49002		61.2	0.118	2.297	0.621	0.07	0.09	0.12	0.17	0.3	0.29	0.39	0.43	0.54
382	TAN2206_SW-100_34-35cm	15/05/2024 11:37:46	34.5	7.48	16.2	24.8	33.5	53.3	78	91.7	105	122	0.00748	0.0162	0.0248	0.0335	0.0533	0.078	0.0917	0.105	0.122	7.06275	5.94786	5.33352	4.8997	4.22972	3.68038	3.44693	3.25154	3.03505	-1.88658	-0.471645	-4.0277	-0.610257	2.49684		61.2	0.129	2.301	0.63	0.07	0.09	0.12	0.17	0.3	0.29	0.39	0.43	0.55
383	TAN2206_SW-100_34-35cm	15/05/2024 11:38:09	34.5	7.49	16.2	24.8	33.5	53.3	78	91.6	105	122	0.00749	0.0162	0.0248	0.0335	0.0533	0.078	0.0916	0.105	0.122	7.06082	5.94786	5.33352	4.8997	4.22972	3.68038	3.44851	3.25154	3.03505	-1.88501	-0.471252	-4.02577	-0.609965	2.49497		61.2	0.128	2.299	0.627	0.07	0.09	0.12	0.17	0.3	0.29	0.39	0.43	0.54
384	TAN2206_SW-100_34-35cm	15/05/2024 11:38:33	34.5	7.51	16.2	24.8	33.5	53.2	77.8	91.4	104	121	0.00751	0.0162	0.0248	0.0335	0.0532	0.0778	0.0914	0.104	0.121	7.05697	5.94786	5.33352	4.8997	4.23243	3.68409	3.45166	3.26534	3.04692	-1.88185	-0.470464	-4.01005	-0.607583	2.48944		61.1	0.123	2.296	0.624	0.07	0.09	0.12	0.17	0.3	0.29	0.39	0.43	0.54
385	Average of 'TAN2206_SW-100_34-35cm'	15/05/2024 11:34:53	34.5	7.44	16.1	24.8	33.4	53.3	77.9	91.5	104	121	0.00744	0.0161	0.0248	0.0334	0.0533	0.0779	0.0915	0.104	0.121	7.07048	5.9568	5.33352	4.90401	4.22972	3.68223	3.45008	3.26534	3.04692	-1.88343	-0.470858	-4.02356	-0.60963	2.49306		61.2	0.12	2.301	0.624	0.07	0.08	0.12	0.17	0.3	0.29	0.39	0.43	0.55
386	TAN2206_SW-100_35-36cm	15/05/2024 11:46:33	35.5	9.19	17.6	24.3	31.7	49.9	73.5	86.5	99.4	117	0.00919	0.0176	0.0243	0.0317	0.0499	0.0735	0.0865	0.0994	0.117	6.76572	5.82828	5.3629	4.97937	4.32482	3.76611	3.53116	3.33061	3.09542	-1.83174	-0.457936	-3.6703	-0.556106	2.38785		56.2	0.37	2.178	0.752	0.006	0.08	0.11	0.14	0.24	0.23	0.31	0.34	0.43
[truncated: 43 more rows]
[truncated: 40 more columns]

## Sheet: SW-111
Record Number	Sample Name	Measurement Date Time	Depth	MICRONS									mm									PHI									Graphical Standard Deviation						Mode	Kurtosis [3]	GSD [3]	Skew [3]	VOL% GRAINSIZE BINS
[truncated: 90 more rows]
[truncated: 40 more columns]
