# Supplementary material for: The seafloor record of explosive submarine volcanic eruptions
Source: Research Square preprint supplement (doi:10.21203/rs.3.rs-6630366/v1), 2025-06-12
Supplement: Supplementary file 2 [file 63ce2babc7a2a4a8d4d31da2.xlsx]

## Sheet: SW-80 EPMA Data
Sample #	Sample Depth (cm)	Shard #	Data Acquisition	SiO2	Na2O	K2O	Al2O3	FeO	CaO	P2O5	TiO2	MnO	MgO	Total Alkali (K2O+Na2O)
1	0-0.5	0-0.5 9023 Shard10a	Manual	56.6704	2.1899	0.4571	14.8925	9.9288	8.9556	0.0835	0.5791	0.1573	3.6986	2.647
1	0-0.5	0-0.5 9023 Shard11a	Automatic	57.0473	1.1167	0.5117	14.3661	10.5931	9.4081	0.0903	0.5658	0.1891	3.932	1.6284
1	0-0.5	0-0.5 9023 Shard12a	Automatic	58.1991	2.1666	0.4847	14.7339	9.9057	8.8539	0.0868	0.5795	0.1865	3.5361	2.6513
1	0-0.5	0-0.5 9023 Shard12a	Manual	57.8188	2.1351	0.5498	14.822	10.1498	8.3348	0.103	0.6126	0.1526	2.8683	2.6849
1	0-0.5	0-0.5 9023 Shard13a	Automatic	58.5248	1.9185	0.4713	14.4256	10.0577	9.0075	0.0844	0.5916	0.1797	3.6596	2.3898
1	0-0.5	0-0.5 9023 Shard14a	Automatic	57.7812	2.0612	0.5058	14.7309	9.9862	9.0818	0.0786	0.5924	0.1802	3.6618	2.567
1	0-0.5	0-0.5 9023 Shard15a	Manual	57.9373	2.1337	0.5413	14.5646	10.2857	8.7919	0.0944	0.6059	0.1864	3.5218	2.675
1	0-0.5	0-0.5 9023 Shard16a	Manual	57.8649	2.1407	0.5359	14.1913	10.916	8.3331	0.0927	0.6516	0.1728	3.0368	2.6766
1	0-0.5	0-0.5 9023 Shard17a	Automatic	58.6669	0.3565	0.5041	14.648	10.5321	9.199	0.1029	0.5913	0.1742	3.693	0.8606
1	0-0.5	0-0.5 9023 Shard18a	Automatic	58.0633	1.9639	0.4412	14.6711	10.3958	8.8695	0.0727	0.5933	0.1721	3.4993	2.4051
1	0-0.5	0-0.5 9023 Shard19a	Automatic	61.84	2.2248	0.7929	12.0737	11.7581	6.6291	0.1357	0.9009	0.1811	1.8491	3.0177
1	0-0.5	0-0.5 9023 Shard19b	Automatic	61.883	1.806	0.7298	11.5213	11.4292	6.812	0.1349	0.8887	0.1726	1.8675	2.5358
1	0-0.5	0-0.5 9023 Shard1a	Manual	57.1018	2.0818	0.5145	14.4038	9.8864	8.5823	0.1035	0.6431	0.1822	3.5236	2.5963
1	0-0.5	0-0.5 9023 Shard20a	Automatic	58.1085	2.1258	0.4604	14.8087	10.3092	8.8254	0.0848	0.5798	0.1828	3.6925	2.5862
1	0-0.5	0-0.5 9023 Shard21a	Automatic	60.2629	2.1568	0.7102	12.3004	11.1779	7.6448	0.1162	0.755	0.1764	2.5833	2.867
1	0-0.5	0-0.5 9023 Shard22a	Automatic	58.4492	2.0631	0.5219	14.3017	10.348	8.6844	0.0799	0.5848	0.1704	3.6731	2.585
1	0-0.5	0-0.5 9023 Shard22b	Automatic	58.5915	1.9509	0.5113	14.4137	10.5239	8.9074	0.0883	0.5848	0.1717	3.728	2.4622
1	0-0.5	0-0.5 9023 Shard23a	Automatic	56.4103	1.9184	0.4569	14.5491	10.082	8.7758	0.0798	0.5788	0.1742	3.6554	2.3753
1	0-0.5	0-0.5 9023 Shard23b	Automatic	56.7539	2.0329	0.5313	14.1603	9.9903	9.0272	0.0804	0.5793	0.1747	3.6978	2.5642
1	0-0.5	0-0.5 9023 Shard24a	Automatic	60.1006	2.5017	0.588	13.2484	10.5397	7.3904	0.1116	0.6337	0.1977	2.5346	3.0897
1	0-0.5	0-0.5 9023 Shard24b	Automatic	60.2169	2.5406	0.5711	13.1819	10.6188	7.4746	0.1188	0.6457	0.1905	2.481	3.1117
1	0-0.5	0-0.5 9023 Shard25a	Automatic	56.6904	1.8784	0.5301	14.5493	10.3546	8.8879	0.0826	0.5845	0.1765	3.6694	2.4085
1	0-0.5	0-0.5 9023 Shard2a	Manual	53.992	1.3797	0.5157	8.4598	16.1503	7.5847	0.111	0.7718	0.3413	8.5152	1.8954
1	0-0.5	0-0.5 9023 Shard4a	Manual	56.9351	2.0393	0.4835	14.4797	10.2269	8.9138	0.0906	0.592	0.1636	3.5957	2.5228
1	0-0.5	0-0.5 9023 Shard5a	Automatic	56.2674	2.0196	0.4801	14.3578	10.4148	8.9936	0.0797	0.5736	0.1624	3.9168	2.4997
1	0-0.5	0-0.5 9023 Shard5b	Automatic	55.6791	2.0201	0.445	13.9962	10.5926	9.1729	0.0817	0.5773	0.1878	3.9621	2.4651
1	0-0.5	0-0.5 9023 Shard6a	Automatic	58.156	2.1249	0.5229	14.4087	9.9772	9.0708	0.0875	0.5869	0.165	3.6185	2.6478
1	0-0.5	0-0.5 9023 Shard7a	Automatic	56.7337	2.3079	0.5912	13.553	11.4218	8.7941	0.1694	0.834	0.1945	3.848	2.8991
1	0-0.5	0-0.5 9023 Shard8a	Manual	57.6659	2.2617	0.6275	14.055	10.6916	7.6699	0.0971	0.6788	0.1594	2.8383	2.8892
1	0-0.5	0-0.5 9023 Shard9a	Manual	53.6372	1.4092	0.2666	16.0934	9.2832	10.8686	0.0622	0.4413	0.1435	4.9613	1.6758
2	9-10	9-10 9023 Shard10a	Automatic	57.1932	2.1684	0.4522	14.3552	10.1635	8.7755	0.0879	0.5787	0.177	3.7517	2.6206
2	9-10	9-10 9023 Shard10b	Automatic	58.3162	2.0373	0.5361	14.8703	9.9429	8.7689	0.0938	0.581	0.183	3.7347	2.5734
2	9-10	9-10 9023 Shard11a	Automatic	56.6513	2.0252	0.4387	14.4965	10.3662	8.9979	0.0846	0.5698	0.1766	3.7954	2.4639
2	9-10	9-10 9023 Shard11b	Automatic	56.0443	2.2704	0.4835	14.4156	10.5326	9.073	0.0833	0.5715	0.1927	3.9726	2.7539
2	9-10	9-10 9023 Shard12a	Automatic	59.159	2.2673	0.543	14.1186	10.3578	8.0963	0.1029	0.6534	0.1717	2.9699	2.8103
2	9-10	9-10 9023 Shard13a	Automatic	56.1903	2.006	0.452	14.3364	10.3148	8.7914	0.0838	0.5803	0.1694	3.7267	2.458
2	9-10	9-10 9023 Shard14a	Automatic	56.6757	1.874	0.4229	14.7094	10.3079	8.9267	0.0835	0.5734	0.1765	3.6109	2.2969
2	9-10	9-10 9023 Shard15a	Manual	56.9452	2.2515	0.5185	13.9884	10.0963	8.9825	0.0967	0.565	0.1733	3.1938	2.77
2	9-10	9-10 9023 Shard16a	Manual	56.8879	2.1245	0.4438	14.5663	9.9593	9.4199	0.0931	0.5508	0.1839	3.8759	2.5683
2	9-10	9-10 9023 Shard17a	Manual	60.1813	2.0822	0.668	12.3447	12.1012	7.4468	0.1266	0.7879	0.1686	2.3937	2.7502
2	9-10	9-10 9023 Shard18a	Manual	57.4537	1.9313	0.5542	14.5474	9.5991	9.2198	0.1028	0.6417	0.1535	4.345	2.4855
2	9-10	9-10 9023 Shard19a	Manual	58.4657	2.6399	0.4739	11.1513	12.844	7.7283	0.1067	0.7028	0.2117	3.9733	3.1138
2	9-10	9-10 9023 Shard1a	Automatic	56.3838	2.0446	0.4186	14.1841	10.3781	9.0522	0.079	0.5723	0.1774	3.8686	2.4632
2	9-10	9-10 9023 Shard20a	Manual	56.5002	1.5385	0.3625	13.2553	11.4628	10.3386	0.077	0.5352	0.1916	4.6603	1.901
2	9-10	9-10 9023 Shard2a	Automatic	56.3804	2.0441	0.4723	14.2864	10.3574	8.5317	0.0857	0.5923	0.1745	3.6245	2.5164
2	9-10	9-10 9023 Shard3a	Automatic	55.5219	2.2872	0.448	16.8782	8.5971	9.5916	0.0696	0.4535	0.1323	2.4648	2.7352
2	9-10	9-10 9023 Shard4a	Automatic	57.6043	2.156	0.5572	14.5241	10.428	8.6112	0.0845	0.5803	0.165	3.5882	2.7132
2	9-10	9-10 9023 Shard5a	Automatic	58.2356	2.0829	0.5135	14.4841	10.7027	8.7485	0.0772	0.5841	0.1682	3.6652	2.5964
2	9-10	9-10 9023 Shard6a	Automatic	58.1451	2.4827	0.5635	13.8564	10.4162	8.213	0.1133	0.7043	0.1766	3.139	3.0462
2	9-10	9-10 9023 Shard7a	Automatic	57.1578	2.0118	0.4943	14.4545	10.0462	8.9745	0.0917	0.58	0.1628	3.7273	2.5061
2	9-10	9-10 9023 Shard8a	Automatic	57.0164	2.0244	0.4909	14.9213	9.8431	8.9324	0.0882	0.6	0.1583	3.5756	2.5153
2	9-10	9-10 9023 Shard9a	Automatic	57.1162	2.1593	0.4928	14.9916	9.8768	8.778	0.0887	0.5786	0.1766	3.7999	2.6521
3	17-18	17-18 9023 Shard12a	Automatic	59.0975	2.026	0.5526	13.8305	9.9447	7.406	0.1081	0.7464	0.1766	2.9357	2.5786
3	17-18	17-18 9023 Shard13a	Automatic	56.908	2.0479	0.4724	14.3268	10.1141	8.9288	0.1011	0.5775	0.1639	3.6598	2.5203
3	17-18	17-18 9023 Shard14a	Automatic	60.724	2.4486	0.6452	13.3315	10.3496	7.3142	0.1022	0.6873	0.1623	2.4628	3.0938
3	17-18	17-18 9023 Shard15a	Automatic	56.5509	2.1331	0.4989	14.7697	10.2711	8.8381	0.0809	0.5906	0.1884	3.2875	2.632
3	17-18	17-18 9023 Shard16a	Manual	58.9593	2.1583	0.4646	14.3485	10.8594	8.6669	0.0869	0.618	0.179	3.166	2.6229
3	17-18	17-18 9023 Shard17a	Manual	57.025	2.0542	0.4067	14.5251	12.2523	9.12	0.0785	0.5976	0.1987	3.761	2.4609
3	17-18	17-18 9023 Shard18a	Manual	58.4071	2.1519	0.4003	13.9926	10.8277	8.7123	0.0808	0.5534	0.2031	3.4112	2.5522
3	17-18	17-18 9023 Shard19a	Manual	60.1843	2.3686	0.6478	13.8768	10.5328	8.0145	0.1069	0.6685	0.1683	2.7206	3.0164
3	17-18	17-18 9023 Shard1a	Automatic	55.8545	2.1126	0.4891	14.6678	10.2067	8.8905	0.0873	0.5715	0.1615	3.8084	2.6017
3	17-18	17-18 9023 Shard20a	Manual	60.3652	2.8521	0.5958	13.6542	10.5032	7.7134	0.1537	0.8456	0.1714	2.5659	3.4479
3	17-18	17-18 9023 Shard21a	Manual	57.4974	2.0734	0.5449	14.1317	10.2623	9.1557	0.0872	0.5823	0.1748	3.6597	2.6183
3	17-18	17-18 9023 Shard22a	Manual	57.0969	1.8656	0.4502	14.4582	10.8641	9.5378	0.0802	0.5687	0.1852	4.078	2.3158
3	17-18	17-18 9023 Shard2a	Automatic	57.992	1.5143	0.3554	13.1767	10.4677	9.8608	0.0605	0.5073	0.1784	4.2483	1.8697
3	17-18	17-18 9023 Shard3a	Automatic	56.4712	2.0566	0.4643	14.3071	10.646	8.9779	0.0871	0.5806	0.1735	3.7539	2.5209
3	17-18	17-18 9023 Shard4a	Automatic	56.3029	1.8828	0.4814	14.3024	9.9226	8.8124	0.0877	0.5726	0.1649	3.6687	2.3642
3	17-18	17-18 9023 Shard5a	Automatic	56.9639	2.3303	0.528	14.4566	10.1117	8.8891	0.0846	0.5774	0.1651	3.7228	2.8583
3	17-18	17-18 9023 Shard6a	Automatic	56.8333	2.2011	0.4735	14.4279	9.9307	8.4879	0.0878	0.5647	0.1727	3.6757	2.6746
3	17-18	17-18 9023 Shard8a	Automatic	57.2945	2.1233	0.451	13.9273	10.5038	8.7942	0.0785	0.5792	0.1909	3.8058	2.5743
4	19-20	19-20 9023 Shard10a	Automatic	56.0081	2.0068	0.4966	14.1138	10.4877	8.9239	0.0943	0.5797	0.1648	3.7558	2.5034
4	19-20	19-20 9023 Shard11	Manual	56.517	2.1975	0.5149	14.3281	10.2828	8.9005	0.0852	0.5617	0.1521	3.5348	2.7124
4	19-20	19-20 9023 Shard12	Manual	56.7985	1.9491	0.4771	13.5586	10.1295	9.0421	0.0816	0.5704	0.1738	3.7158	2.4262
4	19-20	19-20 9023 Shard13	Manual	56.5726	1.9595	0.4159	14.0873	10.2885	9.2536	0.0935	0.5675	0.1676	3.806	2.3754
4	19-20	19-20 9023 Shard14	Manual	57.2091	1.9462	0.4962	13.9682	10.033	8.7756	0.0908	0.582	0.1699	3.426	2.4424
4	19-20	19-20 9023 Shard15	Manual	56.6098	1.9797	0.5292	14.3899	10.6989	9.4795	0.0868	0.5691	0.1684	3.724	2.5089
4	19-20	19-20 9023 Shard16	Manual	62.8238	2.6735	0.7758	12.5835	9.8339	6.5517	0.1375	0.6664	0.1693	1.703	3.4493
4	19-20	19-20 9023 Shard17	Manual	56.8907	1.9207	0.442	14.8735	10.2259	8.9678	0.0912	0.5679	0.1805	3.6597	2.3627
4	19-20	19-20 9023 Shard1a	Automatic	61.2673	2.7105	0.6696	11.8804	11.0343	6.3057	0.1396	0.8288	0.1848	2.4139	3.3801
4	19-20	19-20 9023 Shard2a	Automatic	55.8677	2.6553	0.7082	13.2474	11.2988	8.3581	0.1508	0.8629	0.1942	3.3281	3.3635
4	19-20	19-20 9023 Shard3a	Automatic	56.74	2.0362	0.4806	14.2228	10.5948	9.1246	0.0906	0.5822	0.1647	3.6735	2.5168
4	19-20	19-20 9023 Shard5a	Automatic	58.0804	2.2053	0.5644	14.477	9.9398	8.7874	0.0982	0.5837	0.1726	3.5883	2.7697
4	19-20	19-20 9023 Shard6a	Automatic	60.0779	2.361	0.6082	13.8872	10.5101	7.8733	0.1159	0.6805	0.1566	2.6797	2.9692
4	19-20	19-20 9023 Shard7a	Automatic	55.3353	1.8867	0.4362	14.3613	10.1358	9.6823	0.0969	0.5146	0.1684	4.5482	2.3229
4	19-20	19-20 9023 Shard8a	Automatic	56.9808	2.0911	0.4958	14.8001	10.2551	9.0324	0.0872	0.5619	0.1716	3.581	2.5869
4	19-20	19-20 9023 Shard9a	Automatic	56.5883	2.1006	0.4758	14.1253	10.1016	8.9325	0.0937	0.5778	0.164	3.6612	2.5764
5	21-22.5	21-22.5 9023 Shard10a	Automatic	58.1345	2.184	0.5231	14.1829	10.4514	9.3949	0.0865	0.5796	0.1675	3.6368	2.7071
5	21-22.5	21-22.5 9023 Shard11a	Automatic	57.1207	1.9188	0.4406	14.5552	10.6012	8.8461	0.0836	0.568	0.174	3.7832	2.3594
5	21-22.5	21-22.5 9023 Shard12a	Automatic	56.5577	2.1037	0.4971	13.2875	10.1791	9.049	0.0854	0.5652	0.1813	3.7992	2.6008
5	21-22.5	21-22.5 9023 Shard13a	Automatic	56.0404	1.9939	0.454	14.1961	10.5186	9.1174	0.0853	0.5662	0.1732	3.8155	2.4479
5	21-22.5	21-22.5 9023 Shard14a	Automatic	55.4755	1.3552	0.3967	13.7072	10.7848	10.6438	0.0689	0.4951	0.1898	5.0699	1.7519
5	21-22.5	21-22.5 9023 Shard15a	Automatic	54.8422	1.7822	0.439	13.9338	10.1724	10.0163	0.0879	0.5202	0.1698	4.6879	2.2212
5	21-22.5	21-22.5 9023 Shard16a	Automatic	59.199	2.3434	0.623	13.6792	10.2894	7.9887	0.1072	0.6414	0.1809	2.8146	2.9664
5	21-22.5	21-22.5 9023 Shard17a	Automatic	57.4466	2.1086	0.4679	14.3294	10.427	8.9504	0.0785	0.5809	0.1617	3.6152	2.5765
5	21-22.5	21-22.5 9023 Shard18	Manual	57.9389	2.0618	0.4954	14.7514	10.1857	9.0314	0.0973	0.5599	0.1796	3.6825	2.5572
5	21-22.5	21-22.5 9023 Shard19	Manual	57.003	2.0659	0.4484	14.3283	10.4575	9.138	0.0819	0.5885	0.1668	3.7138	2.5143
5	21-22.5	21-22.5 9023 Shard1a	Automatic	56.7004	2.0649	0.5262	14.4215	10.0124	8.979	0.0764	0.5779	0.1641	3.5245	2.5911
5	21-22.5	21-22.5 9023 Shard20	Manual	59.3309	1.4945	0.3842	13.8561	10.5437	9.5594	0.0741	0.5265	0.1633	3.7182	1.8787
5	21-22.5	21-22.5 9023 Shard21	Manual	56.6681	1.7961	0.3986	13.9039	10.5178	9.9891	0.0884	0.5166	0.1837	4.531	2.1947
5	21-22.5	21-22.5 9023 Shard22	Manual	57.4427	1.9644	0.5495	13.7591	10.0914	8.6062	0.0945	0.6115	0.1639	3.2856	2.5139
5	21-22.5	21-22.5 9023 Shard23	Manual	57.4075	2.1219	0.5679	14.2307	10.3206	8.8248	0.0887	0.6122	0.1744	3.3072	2.6898
5	21-22.5	21-22.5 9023 Shard2a	Automatic	55.8495	1.7628	0.4888	14.2503	10.5092	8.7648	0.091	0.5951	0.1691	3.7403	2.2516
5	21-22.5	21-22.5 9023 Shard4a	Automatic	57.1852	1.9737	0.5228	13.8113	10.5332	8.8621	0.0901	0.6028	0.1718	3.5433	2.4965
5	21-22.5	21-22.5 9023 Shard5a	Automatic	57.8557	2.0587	0.4756	13.868	10.158	9.0619	0.0892	0.5648	0.1878	3.6575	2.5343
5	21-22.5	21-22.5 9023 Shard6a	Automatic	59.7128	2.1703	0.6607	13.8473	10.5688	8.0254	0.1021	0.6441	0.1766	2.9422	2.831
5	21-22.5	21-22.5 9023 Shard7a	Automatic	58.3515	2.3458	0.5916	14.1618	9.7184	8.7327	0.0831	0.5645	0.1597	3.4886	2.9374
5	21-22.5	21-22.5 9023 Shard8a	Automatic	56.4252	1.8766	0.4091	14.2123	10.4814	9.3863	0.0906	0.5781	0.1813	4.2415	2.2857
5	21-22.5	21-22.5 9023 Shard9a	Automatic	56.3219	1.9628	0.4956	14.3385	9.6314	9.299	0.0875	0.5627	0.1543	3.8136	2.4584
6	23-23.5	23-23.5 90-23 Shard10a	Automatic	56.6894	2.3551	0.548	14.0793	10.6136	8.6409	0.1032	0.6765	0.1744	3.5785	2.9031
6	23-23.5	23-23.5 90-23 Shard11a	Automatic	56.1664	2.021	0.4881	14.1088	10.4631	9.094	0.0731	0.5649	0.1768	3.8483	2.5091
6	23-23.5	23-23.5 90-23 Shard12a	Automatic	56.034	2.0871	0.511	14.1895	10.675	8.8722	0.09	0.5673	0.1564	3.7872	2.5981
6	23-23.5	23-23.5 90-23 Shard13a	Automatic	56.4134	2.1227	0.4679	13.4841	10.6712	8.8281	0.083	0.5763	0.1743	3.7444	2.5906
6	23-23.5	23-23.5 90-23 Shard14a	Automatic	57.0899	1.8935	0.4661	14.346	10.5633	9.052	0.0853	0.5761	0.1683	3.7643	2.3596
6	23-23.5	23-23.5 90-23 Shard15a	Automatic	56.8951	1.9903	0.4869	13.9589	9.9934	8.9492	0.0851	0.5915	0.1789	3.7318	2.4772
6	23-23.5	23-23.5 90-23 Shard16a	Automatic	55.7547	2.097	0.5182	13.466	10.3158	8.8219	0.0848	0.5787	0.1713	3.6938	2.6152
6	23-23.5	23-23.5 90-23 Shard17a	Automatic	57.9443	2.299	0.5589	13.5718	11.4448	8.5867	0.093	0.6177	0.1908	3.1085	2.8579
6	23-23.5	23-23.5 90-23 Shard18a	Automatic	59.7639	2.3768	0.5716	13.4726	10.6092	7.5455	0.1066	0.6812	0.1638	2.5334	2.9484
6	23-23.5	23-23.5 90-23 Shard19a	Automatic	57.5724	2.1946	0.528	14.5293	10.0773	9.1281	0.0953	0.5845	0.1668	3.6055	2.7226
6	23-23.5	23-23.5 90-23 Shard1a	Automatic	57.6424	1.9127	0.4277	14.5243	10.5161	8.8338	0.0922	0.5743	0.1884	3.6397	2.3404
6	23-23.5	23-23.5 90-23 Shard20a	Automatic	56.7345	1.9608	0.45	13.8884	9.828	8.8066	0.0872	0.5648	0.1797	3.7583	2.4108
6	23-23.5	23-23.5 9023 Shard21a	Manual	56.5736	2.0106	0.508	14.4826	9.8648	8.8144	0.0907	0.5556	0.1692	3.6655	2.5186
6	23-23.5	23-23.5 9023 Shard22a	Manual	55.9042	2.0818	0.4715	14.4476	10.2334	9.1742	0.0903	0.5589	0.1686	3.7834	2.5533
6	23-23.5	23-23.5 9023 Shard23a	Manual	61.8024	2.3121	0.788	12.1848	11.0966	6.7454	0.1528	0.8188	0.1673	1.7692	3.1001
6	23-23.5	23-23.5 90-23 Shard2a	Automatic	56.1852	2.3341	0.457	14.6931	11.0678	8.9932	0.1068	0.6788	0.1909	3.6445	2.7911
6	23-23.5	23-23.5 90-23 Shard3a	Automatic	58.2002	1.8217	0.4321	14.5572	10.3705	9.0602	0.0738	0.5621	0.1718	3.7397	2.2538
6	23-23.5	23-23.5 90-23 Shard4a	Automatic	57.158	2.2564	0.5557	14.4327	10.2611	8.5565	0.1176	0.6858	0.1755	3.4617	2.8121
6	23-23.5	23-23.5 90-23 Shard5a	Automatic	58.2478	2.4482	0.4636	15.6327	9.8997	9.1576	0.079	0.4981	0.1532	2.9044	2.9118
6	23-23.5	23-23.5 90-23 Shard6a	Automatic	56.7553	2.0761	0.4815	14.5442	10.5291	9.1777	0.0855	0.5698	0.1823	3.7732	2.5576
6	23-23.5	23-23.5 90-23 Shard9a	Automatic	55.6774	1.356	0.4454	16.0757	8.8692	11.1616	0.0824	0.3963	0.1561	4.4424	1.8014
7	24.5-25	24.5-25 9023 Shard10a	Automatic	57.1871	1.1462	0.4402	14.4397	10.0281	9.1884	0.0896	0.5637	0.1779	3.7299	1.5864
7	24.5-25	24.5-25 9023 Shard13a	Automatic	56.6626	1.9595	0.5482	14.2815	10.4328	8.9378	0.0802	0.5678	0.1897	3.8483	2.5077
7	24.5-25	24.5-25 9023 Shard14a	Automatic	55.79	2.2137	0.5801	13.7231	9.4924	8.8911	0.1109	0.5842	0.1595	3.7884	2.7938
7	24.5-25	24.5-25 9023 Shard15a	Automatic	55.4808	2.2202	0.5071	13.8068	10.055	8.7745	0.0825	0.5618	0.1576	3.8275	2.7273
7	24.5-25	24.5-25 9023 Shard16a	Manual	62.7647	2.6761	0.7673	12.4979	9.4656	6.4901	0.1351	0.6434	0.1576	1.8455	3.4434
7	24.5-25	24.5-25 9023 Shard17a	Manual	58.437	2.1535	0.5984	13.7367	10.4796	8.5855	0.0956	0.6498	0.1795	3.1742	2.7519
7	24.5-25	24.5-25 9023 Shard19a	Manual	58.061	1.5157	0.4298	13.6543	10.0725	9.992	0.0733	0.4969	0.1642	4.1158	1.9455
7	24.5-25	24.5-25 9023 Shard20a	Manual	55.5524	2.0221	0.4802	14.4666	10.6884	9.7248	0.0876	0.5617	0.1763	4.6555	2.5023
7	24.5-25	24.5-25 9023 Shard21a	Manual	58.7923	2.1574	0.6237	13.7019	10.8477	8.3703	0.1058	0.692	0.1693	2.9008	2.7811
7	24.5-25	24.5-25 9023 Shard22a	Manual	58.8384	1.9947	0.6034	13.2458	11.3335	8.3438	0.1037	0.6792	0.1791	2.739	2.5981
7	24.5-25	24.5-25 9023 Shard2a	Automatic	59.0688	2.3157	0.5185	13.7964	9.9559	8.6762	0.1044	0.6669	0.1802	3.4693	2.8342
7	24.5-25	24.5-25 9023 Shard3a	Automatic	56.3825	2.3096	0.4722	14.3854	10.0869	8.8301	0.0789	0.5724	0.1764	3.7215	2.7818
7	24.5-25	24.5-25 9023 Shard3b	Automatic	57.3441	2.0111	0.4783	14.101	10.3589	9.2136	0.0813	0.569	0.1762	3.7663	2.4894
7	24.5-25	24.5-25 9023 Shard4a	Automatic	56.3813	1.9951	0.4665	14.6064	10.3475	8.9432	0.0821	0.5712	0.1641	3.8346	2.4616
7	24.5-25	24.5-25 9023 Shard5a	Automatic	57.1717	2.0313	0.4961	14.6106	10.0484	9.0761	0.0852	0.5712	0.1751	3.7236	2.5274
7	24.5-25	24.5-25 9023 Shard6a	Automatic	57.3153	1.9642	0.5147	13.8939	10.4817	9.0356	0.0845	0.5708	0.1767	3.76	2.4789
7	24.5-25	24.5-25 9023 Shard7a	Automatic	55.7293	1.9587	0.4614	14.5062	10.6397	9.683	0.0762	0.5191	0.1903	4.4754	2.4201
7	24.5-25	24.5-25 9023 Shard8a	Automatic	55.7337	2.2313	0.4924	14.4592	10.0668	8.9635	0.088	0.5539	0.1688	3.7535	2.7237
7	24.5-25	24.5-25 9023 Shard9a	Automatic	62.3862	2.8862	0.68	11.3453	9.9179	6.5549	0.1557	0.9187	0.1738	1.6828	3.5662
8	25.5-26	25.5-26 9023 Shard 16a	Manual	58.1401	2.0864	0.5717	13.9997	10.6345	8.4589	0.1047	0.6279	0.1828	3.1764	2.6581
8	25.5-26	25.5-26 9023 Shard 17a	Manual	59.2073	1.9524	0.4411	14.6077	11.1036	9.0523	0.0957	0.5533	0.2075	3.4718	2.3935
8	25.5-26	25.5-26 9023 Shard 19a	Manual	57.9287	2.0771	0.492	14.1184	9.9085	8.8595	0.0867	0.5682	0.1641	3.5557	2.5691
8	25.5-26	25.5-26 9023 Shard 20a	Manual	56.8888	2.0956	0.4937	13.9467	10.1791	8.939	0.0925	0.5759	0.1786	3.7128	2.5893
8	25.5-26	25.5-26 9023 Shard 21a	Manual	58.9268	3.2866	0.5282	14.7001	10.122	8.4445	0.1145	0.6716	0.1727	2.1813	3.8148
8	25.5-26	25.5-26 9023 Shard10a	Automatic	58.8767	2.3133	0.5361	13.7853	10.414	8.6888	0.1033	0.7048	0.1849	3.3653	2.8494
8	25.5-26	25.5-26 9023 Shard14a	Automatic	56.7343	2.0523	0.4623	13.927	10.247	9.0881	0.0909	0.5657	0.1592	3.7315	2.5146
8	25.5-26	25.5-26 9023 Shard15a	Automatic	55.7689	2.1793	0.4668	14.0263	10.1206	8.8382	0.0792	0.5651	0.1707	3.8011	2.6461
8	25.5-26	25.5-26 9023 Shard1a	Automatic	58.5995	2.3352	0.5475	13.5891	11.4582	8.3608	0.1121	0.6612	0.2001	3.0262	2.8827
8	25.5-26	25.5-26 9023 Shard2a	Automatic	55.3732	2.1042	0.4404	14.313	10.9216	8.6946	0.116	0.7375	0.1738	3.7812	2.5446
8	25.5-26	25.5-26 9023 Shard3a	Automatic	55.7587	2.0649	0.5114	14.3703	10.1897	9.116	0.0737	0.5643	0.1619	3.8515	2.5763
8	25.5-26	25.5-26 9023 Shard4a	Automatic	57.5387	1.9935	0.4617	14.4093	9.789	9.0639	0.0815	0.5689	0.1602	3.7069	2.4552
8	25.5-26	25.5-26 9023 Shard5a	Automatic	56.5483	1.4878	0.3763	13.1755	11.1416	9.9469	0.088	0.5461	0.1867	4.4781	1.8641
8	25.5-26	25.5-26 9023 Shard6a	Automatic	55.9515	2.1306	0.4452	14.1684	10.3064	9.3347	0.0833	0.5712	0.1757	3.8089	2.5758
8	25.5-26	25.5-26 9023 Shard7a	Automatic	59.0322	2.0606	0.6099	13.4342	10.3469	9.0178	0.0916	0.6604	0.164	3.6736	2.6705
8	25.5-26	25.5-26 9023 Shard9a	Automatic	58.9989	2.2434	0.5309	14.3452	10.2603	8.4082	0.1071	0.6284	0.1808	3.2025	2.7743
9	27-28	27-28 9023 Shard10a	Automatic	58.7891	2.2342	0.464	13.831	10.1135	8.537	0.0945	0.6127	0.1606	3.2833	2.6982
9	27-28	27-28 9023 Shard11a	Automatic	55.6237	1.8858	0.4746	13.7017	10.2618	9.0487	0.0864	0.5847	0.1657	3.6915	2.3604
9	27-28	27-28 9023 Shard12a	Automatic	56.0853	2.015	0.4653	13.9789	10.214	9.1532	0.0782	0.5537	0.1778	3.7901	2.4803
9	27-28	27-28 9023 Shard13a	Automatic	57.631	2.0492	0.4854	14.1242	10.4222	8.7715	0.0938	0.5703	0.1684	3.6663	2.5346
9	27-28	27-28 9023 Shard14a	Automatic	55.5341	2.2591	0.463	13.6573	11.2942	8.3466	0.1102	0.7917	0.1903	3.3756	2.7221
9	27-28	27-28 9023 Shard15a	Automatic	56.7688	2.0582	0.4766	14.4569	9.9556	9.2448	0.0884	0.5503	0.1726	3.8835	2.5348
9	27-28	27-28 9023 Shard16a	Manual	57.1219	1.9544	0.4317	14.3424	10.2869	9.0301	0.0829	0.5725	0.1876	3.6029	2.3861
9	27-28	27-28 9023 Shard17a	Manual	59.25	2.3075	0.6046	13.6414	10.3759	8.4429	0.0957	0.6292	0.1681	3.2384	2.9121
9	27-28	27-28 9023 Shard18a	Manual	56.2793	1.4336	0.3951	14.0014	11.0958	10.3284	0.0778	0.5523	0.1964	4.4481	1.8287
9	27-28	27-28 9023 Shard19a	Manual	59.5049	2.1751	0.6459	13.9726	10.7521	8.4458	0.0934	0.6512	0.1758	2.8987	2.821
9	27-28	27-28 9023 Shard1a	Automatic	58.9418	2.0938	0.519	14.6713	10.0678	8.9298	0.0903	0.5765	0.1844	3.5306	2.6128
9	27-28	27-28 9023 Shard20a	Manual	57.9254	2.0127	0.5041	14.5618	10.5874	9.3055	0.102	0.5788	0.1639	3.7316	2.5168
9	27-28	27-28 9023 Shard21a	Manual	57.7535	1.8967	0.5175	14.5389	10.1343	9.1708	0.0849	0.5706	0.1935	3.7028	2.4142
9	27-28	27-28 9023 Shard2a	Automatic	55.6606	2.1145	0.4757	13.917	11.3622	8.7787	0.1255	0.737	0.1823	3.6564	2.5902
9	27-28	27-28 9023 Shard3a	Automatic	55.6725	2.1745	0.482	13.8714	11.1625	8.7976	0.1098	0.732	0.1747	3.6783	2.6565
9	27-28	27-28 9023 Shard5a	Automatic	57.1107	2.1704	0.4974	14.2352	10.7938	8.9624	0.0827	0.5772	0.1816	3.7843	2.6678
9	27-28	27-28 9023 Shard6a	Automatic	55.1101	2.2211	0.4613	13.8897	11.2783	9.1217	0.1106	0.672	0.1863	3.9033	2.6824
9	27-28	27-28 9023 Shard7a	Automatic	57.8748	2.0766	0.476	13.898	10.5708	8.933	0.0882	0.5761	0.1684	3.7475	2.5526
9	27-28	27-28 9023 Shard8a	Automatic	56.4348	2.0452	0.5149	14.4889	10.6727	9.3374	0.0898	0.5709	0.1818	3.7801	2.5601
9	27-28	27-28 9023 Shard9a	Automatic	56.1975	1.8937	0.4733	14.9488	10.1631	9.0132	0.0728	0.5535	0.1628	3.8026	2.367
10	28	1Y TAN 2006 #10	Automatic	59.2986	2.1522	0.5866	13.812	11.0766	8.136	0.1025	0.6464	0.1809	3.0268	2.7388
10	28	1Y TAN 2006 #10	Automatic	58.0326	2.2404	0.4982	14.2901	10.8466	8.5724	0.1011	0.6228	0.1639	3.1575	2.7386
10	28	1Y TAN 2006 #10	Automatic	57.9279	2.0004	0.5325	14.0073	10.1526	8.8281	0.0874	0.5932	0.1794	3.6266	2.5329
10	28	1Y TAN 2006 #10	Automatic	57.3795	2.2346	0.4968	14.4398	10.4743	8.9613	0.0787	0.5753	0.1759	3.7147	2.7314
10	28	1Y TAN 2006 #10	Automaic	57.1402	2.0955	0.4711	14.4082	9.9864	9.0013	0.0888	0.5849	0.1547	3.6248	2.5666
10	28	1Y TAN 2006 #10	Automatic	57.0813	2.0517	0.4586	14.2296	10.6597	9.0743	0.0804	0.5822	0.183	3.7211	2.5103
10	28	1Y TAN 2006 #10	Automatic	56.9754	1.9468	0.5	14.1243	10.1859	9.1586	0.0977	0.5641	0.1911	3.8192	2.4468
10	28	1Y TAN 2006 #10	Automatic	56.7896	2.018	0.4897	14	10.2298	8.9082	0.0819	0.5607	0.1752	3.7932	2.5077
10	28	1Y TAN 2006 #10	Automatic	56.6954	2.1199	0.4697	14.4517	10.1395	8.8539	0.0826	0.561	0.1767	3.691	2.5896
10	28	1Y TAN 2006 #10	Automatic	56.2397	2.3594	0.4903	14.4462	9.8082	9.4017	0.0969	0.558	0.1673	4.1179	2.8497
10	28	28 9023 Shard10	Manual	57.4872	1.9767	0.5361	14.2509	10.3165	9.1924	0.0823	0.5699	0.1708	3.6487	2.5128
10	28	28 9023 Shard11	Manual	57.2612	1.8696	0.4661	13.8273	10.1912	9.2156	0.0816	0.5588	0.1807	3.8833	2.3357
10	28	28 9023 Shard12	Manual	59.5783	2.2406	0.6228	14.0442	10.1701	8.0054	0.1175	0.6627	0.1822	2.7152	2.8634
10	28	28 9023 Shard13	Manual	59.9151	2.154	0.5532	14.0367	10.4634	8.0785	0.1138	0.6659	0.1734	2.6874	2.7072
10	28	28 9023 Shard14	Manual	57.8585	2.0825	0.5586	13.6661	10.5674	8.8957	0.0957	0.628	0.1877	3.3282	2.6411
10	28	28 9023 Shard15	Manual	58.4673	1.8772	0.4867	14.4397	10.4503	9.5522	0.0947	0.5553	0.178	4.0376	2.3639
10	28	28 9023 Shard9	Manual	56.4785	1.9255	0.5348	14.0882	10.7743	9.0483	0.1004	0.5568	0.1779	3.7384	2.4603
11	29-30	29-30 9023 Shard10a	Automatic	54.93	2.0043	0.4814	13.6146	10.0765	8.8156	0.0793	0.544	0.1557	3.8151	2.4857
11	29-30	29-30 9023 Shard11a	Automatic	57.0544	2.187	0.5464	13.2668	10.4676	8.7348	0.0915	0.605	0.1829	3.4941	2.7334
11	29-30	29-30 9023 Shard11b	Automatic	55.3535	2.4073	0.3959	16.269	8.0614	9.9427	0.0697	0.4729	0.1266	2.6062	2.8032
11	29-30	29-30 9023 Shard12a	Automatic	57.0753	2.112	0.4894	13.8891	10.2315	9.1074	0.084	0.5759	0.1902	3.6868	2.6014
11	29-30	29-30 9023 Shard13a	Automatic	55.4765	2.1343	0.4673	14.1714	10.1798	8.7299	0.0934	0.5694	0.1756	3.5775	2.6016
11	29-30	29-30 9023 Shard14a	Automatic	56.7117	2.1239	0.5396	13.3526	10.4825	8.7051	0.1084	0.6026	0.1771	3.4467	2.6635
11	29-30	29-30 9023 Shard15a	Automatic	56.1205	2.0407	0.4452	13.759	10.4301	8.9862	0.0951	0.5846	0.1574	3.6451	2.4859
11	29-30	29-30 9023 Shard16a	Manual	56.3247	2.1117	0.4461	14.2522	10.5118	9.0307	0.0907	0.5565	0.174	3.8497	2.5578
11	29-30	29-30 9023 Shard17a	Manual	57.8858	2.0075	0.5257	14.652	10.1673	8.9686	0.0874	0.5841	0.1711	3.639	2.5332
11	29-30	29-30 9023 Shard18a	Manual	56.8978	1.9937	0.4943	14.3025	10.2866	9.0661	0.0881	0.5702	0.1867	3.6687	2.488
11	29-30	29-30 9023 Shard19a	Manual	57.0256	1.8476	0.4475	13.9476	10.3493	9.1543	0.0824	0.5761	0.1644	3.7339	2.2951
11	29-30	29-30 9023 Shard1a	Automatic	55.8882	2.2114	0.564	13.9437	10.7977	8.7687	0.0869	0.5582	0.164	3.7645	2.7754
11	29-30	29-30 9023 Shard20a	Manual	56.0546	2.0434	0.4942	13.6987	9.8251	8.9727	0.0972	0.5833	0.1654	3.5896	2.5376
11	29-30	29-30 9023 Shard2a	Automatic	56.6766	1.7767	0.5459	12.1993	11.9357	9.0765	0.097	0.6219	0.1874	3.4292	2.3226
11	29-30	29-30 9023 Shard3a	Automatic	56.3279	1.9837	0.5169	14.1109	10.3496	8.8762	0.0825	0.5634	0.1778	3.7605	2.5006
11	29-30	29-30 9023 Shard3b	Automatic	56.0217	2.0094	0.4593	13.9685	10.6153	9.0823	0.0779	0.5575	0.1686	3.8047	2.4687
11	29-30	29-30 9023 Shard3c	Automatic	56.4506	2.1704	0.4723	13.885	10.3119	9.0125	0.0784	0.5597	0.1732	3.6806	2.6427
11	29-30	29-30 9023 Shard4a	Automatic	57.6636	2.1019	0.5727	13.3911	10.6003	8.6558	0.0986	0.6418	0.1639	3.2601	2.6746
11	29-30	29-30 9023 Shard5a	Automatic	56.2536	2.0369	0.5364	14.0445	10.3046	9.1164	0.088	0.5548	0.1636	3.7823	2.5733
11	29-30	29-30 9023 Shard6a	Automatic	54.774	2.1142	0.4869	13.8264	10.5467	8.878	0.0736	0.5579	0.1733	3.8861	2.6011
11	29-30	29-30 9023 Shard7a	Automatic	55.6441	2.0605	0.5025	13.9929	10.2725	8.9769	0.0792	0.5669	0.169	3.7788	2.563
11	29-30	29-30 9023 Shard8a	Automatic	55.9281	1.9947	0.5034	14.0056	10.4292	9.013	0.0792	0.5717	0.181	3.7502	2.4981
11	29-30	29-30 9023 Shard9a	Automatic	54.346	2.2007	0.4705	13.7593	10.3369	9.1791	0.0754	0.5493	0.1627	3.7908	2.6712
12	30-31	30-31 9023 Shard 17a	Manual	55.5462	1.6566	0.3932	14.0244	10.0252	10.7861	0.0773	0.5201	0.1727	5.318	2.0498
12	30-31	30-31 9023 Shard 18a	Manual	57.0642	0.7269	0.4684	14.4194	10.4188	10.0123	0.0808	0.5404	0.1711	4.5384	1.1953
12	30-31	30-31 9023 Shard 19a	Manual	57.658	2.1395	0.5953	13.6291	10.8929	7.9475	0.1151	0.6631	0.1761	2.687	2.7348
12	30-31	30-31 9023 Shard 20a	Manual	57.996	2.1992	0.5011	14.0845	10.0691	8.9103	0.0907	0.574	0.1775	4.0827	2.7003
12	30-31	30-31 9023 Shard10a	Automatic	55.7232	1.3409	0.3439	13.6022	11.4402	10.6644	0.0614	0.5049	0.1926	5.1013	1.6848
12	30-31	30-31 9023 Shard11a	Automatic	57.0149	2.1026	0.5129	13.6077	11.0089	8.7387	0.0966	0.6433	0.1875	3.5895	2.6155
12	30-31	30-31 9023 Shard12a	Automatic	59.2215	2.2869	0.6282	13.6873	10.9642	8.4699	0.1008	0.7027	0.1732	2.5689	2.9151
12	30-31	30-31 9023 Shard13a	Automatic	58.877	2.2554	0.6477	13.8366	10.5569	8.2778	0.0987	0.6258	0.1642	3.0988	2.9031
12	30-31	30-31 9023 Shard14a	Automatic	56.9799	2.0682	0.5824	13.6559	10.4143	9.0927	0.0964	0.5824	0.1786	3.6012	2.6506
12	30-31	30-31 9023 Shard15a	Automatic	57.1351	2.0114	0.5401	13.923	10.327	9.0679	0.0889	0.578	0.1733	3.7836	2.5515
12	30-31	30-31 9023 Shard1a	Automatic	58.2279	2.1231	0.5833	14.0896	10.8797	8.5922	0.0931	0.6131	0.1616	3.2369	2.7064
12	30-31	30-31 9023 Shard2a	Automatic	56.0049	1.8948	0.4633	14.7543	10.0513	8.9439	0.0934	0.5695	0.1782	3.851	2.3581
12	30-31	30-31 9023 Shard3a	Automatic	59.1475	2.1228	0.6183	13.0707	10.7811	8.3301	0.0892	0.6326	0.1802	3.0774	2.7411
12	30-31	30-31 9023 Shard4a	Automatic	56.613	1.9447	0.4431	14.2016	10.0153	9.9156	0.0839	0.5433	0.1796	4.5012	2.3878
12	30-31	30-31 9023 Shard5a	Automatic	56.6815	2.6694	0.409	18.0308	8.5493	10.6737	0.0672	0.4138	0.0983	1.8164	3.0784
12	30-31	30-31 9023 Shard6a	Automatic	55.2227	1.9576	0.4914	13.9494	10.2212	8.8338	0.0857	0.5583	0.177	3.6205	2.449
12	30-31	30-31 9023 Shard7a	Automatic	56.9149	1.3778	0.4332	13.2239	10.233	10.2347	0.0652	0.4353	0.1807	4.662	1.811
12	30-31	30-31 9023 Shard8a	Automatic	59.3039	2.18	0.557	14.0746	10.6361	8.4618	0.0895	0.6205	0.1776	3.2046	2.737
12	30-31	30-31 9023 Shard9a	Automatic	57.6403	2.2676	0.5013	14.0361	11.6295	8.3666	0.1043	0.6421	0.1808	3.1457	2.7689
