# Supplementary material for: The seafloor record of explosive submarine volcanic eruptions
Source: Research Square preprint supplement (doi:10.21203/rs.3.rs-6630366/v1), 2025-06-12
Supplement: Supplementary file 3 [file 871fd821fe61ff0565d1f2e8.xlsx]

## Sheet: SE-19
Depth	position (mm)	sample surface	validity	E-gain	E-offset	F-slope	F-offset	cps	MSE	Al	Si	P	S	Cl	Ar	K	Ca	Sc	Ti	V	Cr	Mn	Fe	Co	Ni	Cu	Zn	Ga	Ge	As	Se	Br	Rb	Sr	Y	Zr	Ba	Ta	W	Pb	Fe a*2	Fe a+b	S1	S2	S3	Mo inc	Mo coh	Dt
0	171.86	7.54	0	0.010269	-0.010571	0.009935	0.07673	64326	1.38	59	684	0	27	1262	1193	1182	26629	63	3641	549	183	4795	225393	403	251	858	491	92	0	123	71	556	358	2471	7	164	0	141	510	0	627	0	1270	789	1142	45746	14875	0.127
0.1	172.86	7.42	1	0.010269	-0.010571	0.009935	0.07673	77740	1.65	113	779	0	59	1689	911	1380	36303	19	4317	821	128	5404	289537	0	261	1098	614	128	10	0	78	570	143	2859	0	288	9	207	520	127	1042	317	1640	1084	2328	48650	17011	0.132
0.2	173.86	7.44	1	0.010269	-0.010571	0.009935	0.07673	81956	1.75	92	854	7	63	1880	789	1599	38295	71	4808	803	250	4232	311471	0	276	1033	608	123	0	0	85	725	198	3037	26	151	21	157	585	215	1043	0	2001	1155	2203	49234	17302	0.133
0.3	174.86	7.47	1	0.010269	-0.010571	0.009935	0.07673	84307	1.71	94	746	0	55	1966	862	1494	37771	17	4899	744	205	4099	320895	0	127	1091	610	41	98	36	37	755	38	3181	0	143	93	165	471	0	1204	347	1840	1208	2622	50817	17865	0.136
0.4	175.86	7.5	1	0.010269	-0.010571	0.009935	0.07673	87121	1.66	105	841	0	73	2181	969	1546	38955	0	5230	848	275	4793	335053	0	268	1201	743	162	0	77	53	644	124	2885	0	0	31	214	615	0	1244	361	1857	1316	2819	51549	17643	0.136
0.5	176.86	7.52	1	0.010269	-0.010571	0.009935	0.07673	86368	1.64	113	826	0	123	2345	952	1412	38402	15	4908	873	190	4289	331643	117	294	1147	712	125	143	0	60	832	232	2968	0	85	54	189	505	188	919	222	1761	1292	2773	51715	17888	0.136
0.6	177.86	7.53	1	0.010269	-0.010571	0.009935	0.07673	87882	1.66	96	855	0	85	2327	897	1429	38794	29	5146	799	272	4555	338472	99	210	1283	660	157	0	45	156	891	232	3244	0	227	48	238	564	109	1269	78	2070	1233	2340	50324	18217	0.137
0.7	178.86	7.55	1	0.010269	-0.010571	0.009935	0.07673	89102	1.65	116	871	0	61	2484	990	1449	40137	0	5183	812	268	4513	343128	0	242	1254	709	87	128	0	151	778	198	3053	0	24	52	169	580	109	1111	351	2120	1222	3052	50585	17839	0.138
0.8	179.86	7.56	1	0.010269	-0.010571	0.009935	0.07673	89412	1.68	117	808	0	36	2446	871	1458	39547	0	5199	961	232	4539	345822	0	229	1163	733	56	0	0	36	827	66	3047	0	93	0	209	690	146	1048	410	1869	1316	2691	51823	18370	0.138
0.9	180.86	7.57	1	0.010269	-0.010571	0.009935	0.07673	89667	1.73	131	892	0	72	2411	933	1435	40424	107	5152	912	237	4420	344362	0	229	1180	726	126	0	0	51	788	0	3020	0	144	73	208	663	27	1246	592	2184	1339	2914	51917	18462	0.139
1	181.86	7.58	1	0.010269	-0.010571	0.009935	0.07673	88907	1.69	113	871	0	52	2527	986	1497	39178	0	5231	892	180	4437	336151	17	155	1081	695	162	170	0	45	871	137	3003	0	221	38	201	637	47	1049	286	2039	1274	2190	52871	18479	0.138
1.1	182.86	7.59	1	0.010269	-0.010571	0.009935	0.07673	91620	1.85	86	891	0	97	2536	927	1549	41280	57	5344	845	278	4650	354233	0	306	1188	761	161	42	0	119	647	202	2930	0	121	0	151	583	0	1172	345	2283	1307	2473	52531	18250	0.139
1.2	183.86	7.6	1	0.010269	-0.010571	0.009935	0.07673	87778	1.76	86	841	0	59	2445	971	1466	38569	0	5157	777	224	4374	338205	0	275	1120	756	114	21	0	177	791	132	2925	0	224	0	239	559	72	1091	342	2107	1224	2617	51333	18242	0.137
1.3	184.86	7.62	1	0.010269	-0.010571	0.009935	0.07673	89605	1.74	106	812	0	65	2515	880	1446	40117	23	5295	820	318	4406	346762	0	187	1144	692	51	16	36	0	749	197	2902	34	199	59	293	638	71	1243	412	2027	1223	2591	51305	18280	0.138
1.4	185.86	7.63	1	0.010269	-0.010571	0.009935	0.07673	90768	1.71	97	878	0	76	2491	888	1586	40827	11	5270	983	228	4626	355067	0	260	1106	703	21	106	0	196	724	198	2954	0	52	10	290	560	128	1305	602	2013	1274	2807	51931	18257	0.138
1.5	186.86	7.63	1	0.010269	-0.010571	0.009935	0.07673	89389	1.72	84	915	0	76	2455	1022	1492	41251	64	5241	855	291	4566	348632	0	213	1131	661	52	0	0	37	716	9	2999	29	15	17	247	561	278	1223	594	2257	1263	2200	50834	18210	0.137
1.6	187.86	7.65	1	0.010269	-0.010571	0.009935	0.07673	90136	1.72	125	834	0	60	2298	940	1471	41311	50	5259	954	251	4843	352401	0	142	1230	733	78	46	0	25	802	164	2914	19	24	101	213	649	72	1351	345	2005	1275	3141	50953	18290	0.137
1.7	188.86	7.66	1	0.010269	-0.010571	0.009935	0.07673	88216	1.78	101	828	10	76	2371	979	1401	39974	27	5089	921	180	4381	344272	0	279	1139	700	154	96	0	26	726	52	2943	0	77	32	184	489	176	1232	487	2003	1230	2905	50135	17814	0.136
1.8	189.86	7.67	1	0.010269	-0.010571	0.009935	0.07673	88625	1.8	134	643	0	80	2913	999	1368	38384	0	4904	847	191	4473	342129	0	175	1122	605	115	11	0	83	762	228	2914	137	7	55	187	611	31	1287	238	2118	1245	2467	51049	18264	0.138
1.9	190.86	7.68	1	0.010269	-0.010571	0.009935	0.07673	90252	1.7	93	654	0	76	3234	971	1343	36510	107	4981	801	270	4512	350775	0	253	1098	666	101	43	59	127	752	182	3104	0	0	14	296	617	145	1165	322	2315	1198	2528	51868	18253	0.138
2	191.86	7.69	1	0.010269	-0.010571	0.009935	0.07673	85085	1.69	95	510	0	86	3208	957	1271	32573	58	4612	730	274	4179	325236	0	270	1185	638	86	0	0	41	621	238	2860	0	32	53	218	580	75	948	150	2175	1242	2805	50455	17928	0.136
2.1	192.86	7.69	1	0.010269	-0.010571	0.009935	0.07673	89994	1.7	48	567	0	74	3501	946	1258	35329	17	4701	885	256	4545	345850	0	222	1175	717	168	114	73	33	895	162	2858	0	36	21	215	566	0	1265	433	1964	1262	2783	51643	18319	0.139
2.2	193.86	7.69	1	0.010269	-0.010571	0.009935	0.07673	90676	1.62	45	542	0	80	3564	946	1190	36626	20	4884	762	301	4510	347639	0	242	1194	685	29	0	0	198	889	307	2924	0	122	0	285	661	225	1252	154	2049	1351	3528	52776	18624	0.139
2.3	194.86	7.7	1	0.010269	-0.010571	0.009935	0.07673	91130	1.69	129	536	0	75	3537	957	1315	35747	13	4888	868	276	4493	349638	0	241	1299	778	160	34	4	66	767	376	2962	0	186	25	182	680	26	1295	178	2099	1303	2812	53772	18908	0.14
2.4	195.86	7.7	1	0.010269	-0.010571	0.009935	0.07673	91700	1.83	93	674	0	56	3206	1009	1394	38853	74	5039	857	250	4578	357314	0	217	1273	731	184	0	0	0	803	169	2966	0	159	45	105	680	106	1162	455	2194	1308	3022	51765	18543	0.139
2.5	196.86	7.71	1	0.010269	-0.010571	0.009935	0.07673	89821	1.62	92	629	0	85	3151	928	1406	37736	0	5077	835	255	4498	351367	0	238	1209	602	112	0	52	43	825	250	2932	10	19	175	158	649	32	1299	270	1992	1330	2992	50744	18210	0.136
2.6	197.86	7.72	1	0.010269	-0.010571	0.009935	0.07673	91516	1.7	107	616	0	82	3304	974	1337	37522	15	5070	806	243	4612	355841	35	245	1135	786	69	0	0	121	817	137	3086	142	209	52	302	664	65	1349	586	2198	1253	2436	52056	18847	0.14
2.7	198.86	7.72	1	0.010269	-0.010571	0.009935	0.07673	94461	1.83	93	598	0	75	3358	936	1350	38042	37	5304	1004	268	7356	368305	0	221	1213	819	33	25	0	120	661	323	2897	0	84	87	310	653	143	1428	164	2135	1503	3233	51646	18408	0.141
2.8	199.86	7.72	1	0.010269	-0.010571	0.009935	0.07673	91991	1.72	85	684	0	101	3185	923	1441	38439	75	4906	828	293	4774	357074	105	271	1324	729	117	0	80	0	771	206	3124	32	0	0	241	628	0	1423	253	2046	1288	2693	52262	18702	0.14
2.9	200.86	7.74	1	0.010269	-0.010571	0.009935	0.07673	92958	1.72	134	737	0	96	3259	991	1539	39518	66	5224	988	289	4807	362442	0	217	1170	623	0	0	0	26	749	272	3115	0	49	42	375	672	92	1276	197	2177	1410	2813	51435	18667	0.139
3	201.86	7.73	1	0.010269	-0.010571	0.009935	0.07673	94843	1.84	110	848	0	72	2972	955	1503	41828	51	5533	895	265	4823	372190	0	206	1286	717	114	0	190	171	856	18	3264	139	0	5	161	669	0	1480	653	2407	1411	2745	52834	18966	0.14
3.1	202.86	7.74	1	0.010269	-0.010571	0.009935	0.07673	92821	1.66	88	802	0	82	3026	965	1434	40943	215	5171	981	318	4729	361292	146	218	1228	713	197	49	118	104	732	177	3114	0	17	43	260	763	52	1433	480	1874	1372	2873	51461	18782	0.139
3.2	203.86	7.74	1	0.010269	-0.010571	0.009935	0.07673	94638	1.85	124	769	0	73	3034	994	1522	41432	81	5339	982	289	4722	370257	89	226	1318	819	131	0	9	118	816	347	3184	0	134	0	288	663	141	1230	186	2198	1467	2462	51990	19004	0.14
3.3	204.86	7.75	1	0.010269	-0.010571	0.009935	0.07673	92965	1.73	122	690	0	85	3466	944	1449	38473	37	5140	872	282	4887	361475	0	218	1071	786	192	112	0	133	786	67	3016	0	0	0	186	544	119	1396	399	2174	1318	3155	51896	18770	0.14
3.4	205.86	7.75	1	0.010269	-0.010571	0.009935	0.07673	95439	1.81	127	599	0	115	3750	914	1346	38021	61	5069	907	289	4779	370525	0	225	1261	784	148	130	61	61	737	0	3014	49	62	41	196	521	0	1311	750	2213	1313	2765	52948	18946	0.142
3.5	206.86	7.75	1	0.010269	-0.010571	0.009935	0.07673	95821	1.77	100	743	0	104	3447	986	1497	40272	0	5383	965	225	4706	372878	0	346	1267	795	0	0	106	71	703	274	3202	0	19	42	297	599	0	1121	294	2387	1361	2682	53416	19342	0.142
3.6	207.86	7.75	1	0.010269	-0.010571	0.009935	0.07673	95243	1.8	122	720	0	53	3319	984	1390	40008	59	5413	891	196	4721	371359	26	234	1269	826	133	46	202	120	682	244	3240	54	122	0	292	630	0	1431	409	2121	1360	2587	52632	18918	0.141
3.7	208.86	7.75	1	0.010269	-0.010571	0.009935	0.07673	93674	1.85	102	728	0	62	3306	989	1377	40216	108	5033	1066	198	4602	362969	173	111	1229	783	61	0	87	61	729	323	3023	32	121	0	253	614	0	1338	196	2169	1280	2280	53131	19320	0.141
3.8	209.86	7.75	1	0.010269	-0.010571	0.009935	0.07673	96092	1.73	118	794	0	85	3344	923	1513	41335	0	5295	887	256	4785	374738	0	241	1311	710	67	0	0	102	711	192	3075	31	57	38	318	664	36	1395	370	2162	1418	3022	52891	19212	0.142
3.9	210.86	7.75	1	0.010269	-0.010571	0.009935	0.07673	94759	1.83	100	726	0	91	3259	938	1528	41124	128	5319	1063	315	4745	370666	61	221	1224	772	147	0	55	66	774	365	3087	0	57	103	224	635	0	1323	96	2194	1350	2588	52877	18812	0.141
4	211.86	7.75	1	0.010269	-0.010571	0.009935	0.07673	95887	1.79	92	775	0	90	3110	1012	1558	42861	27	5674	923	266	4906	376030	0	249	1360	690	141	0	179	152	820	360	3222	0	44	79	275	678	54	1203	324	2283	1378	2819	52632	19102	0.141
4.1	212.86	7.74	1	0.010269	-0.010571	0.009935	0.07673	95728	1.74	83	792	0	66	3081	985	1524	42085	156	5507	978	210	4777	375112	42	157	1286	758	166	0	72	42	798	280	3263	0	128	74	214	606	0	1747	561	1850	1469	2987	52555	19245	0.142
4.2	213.86	7.74	1	0.010269	-0.010571	0.009935	0.07673	94624	1.73	95	725	0	75	3330	925	1434	41897	60	5348	1011	246	4747	368317	0	208	1290	694	217	0	0	49	679	198	3243	0	91	6	236	603	20	1291	322	2073	1388	3098	52395	19253	0.141
4.3	214.86	7.75	1	0.010269	-0.010571	0.009935	0.07673	95201	1.8	132	674	0	144	3504	1019	1528	39605	28	5352	997	259	4857	372091	0	229	1237	714	0	0	0	0	718	65	3159	0	109	47	307	635	213	1229	464	2159	1302	2942	52945	19154	0.142
4.4	215.86	7.75	1	0.010269	-0.010571	0.009935	0.07673	95791	1.75	114	622	0	86	3562	1036	1371	39306	66	5374	967	157	4924	375960	48	244	1397	795	102	71	85	96	842	192	3056	0	194	61	238	639	0	1348	306	2149	1453	2585	52465	19187	0.141
4.5	216.86	7.74	1	0.010269	-0.010571	0.009935	0.07673	95168	1.82	80	545	0	96	3641	961	1312	40013	0	5350	885	268	4837	371400	0	201	1249	821	196	86	0	124	842	289	3104	0	0	19	221	695	156	1305	216	2288	1482	3138	52980	19075	0.141
4.6	217.86	7.74	1	0.010269	-0.010571	0.009935	0.07673	95177	1.67	89	549	0	95	3570	938	1448	39252	44	5362	933	267	4784	373423	0	231	1336	716	18	112	0	18	871	86	3036	0	292	7	233	630	254	1185	671	2510	1521	2752	51279	19053	0.141
4.7	218.86	7.74	1	0.010269	-0.010571	0.009935	0.07673	94150	1.73	94	611	0	120	3453	1006	1358	39444	107	5090	899	301	4824	368744	312	257	1316	770	144	32	170	72	738	320	3015	0	123	116	206	659	0	1322	304	2013	1483	2268	52736	18933	0.14
4.8	219.86	7.74	1	0.010269	-0.010571	0.009935	0.07673	94386	1.71	85	582	0	123	3644	987	1478	38755	48	5278	914	238	4718	369150	133	322	1231	792	82	47	24	122	855	63	3016	186	0	54	238	627	149	1164	434	1910	1466	2939	52285	19029	0.141
4.9	220.86	7.73	1	0.010269	-0.010571	0.009935	0.07673	96500	1.79	108	628	0	99	3690	988	1470	40256	55	5249	920	296	4915	376991	0	257	1238	758	86	0	0	176	801	233	3156	0	238	71	355	592	86	1357	399	2258	1493	3504	53127	19178	0.143
5	221.86	7.74	1	0.010269	-0.010571	0.009935	0.07673	94327	1.68	84	683	0	70	3334	930	1452	39483	0	5396	936	202	4741	367458	0	308	1195	750	51	37	0	80	769	297	3218	37	241	0	324	620	17	1578	260	2101	1372	2971	52090	19260	0.141
5.1	222.86	7.73	1	0.010269	-0.010571	0.009935	0.07673	95833	1.83	105	618	0	72	3583	867	1404	39468	45	5315	893	228	4813	374704	0	287	1312	832	212	0	11	164	721	240	3049	81	0	0	180	643	34	1466	370	2101	1460	3857	52957	19294	0.142
5.2	223.86	7.73	1	0.010269	-0.010571	0.009935	0.07673	96270	1.87	116	599	0	77	3643	877	1404	40012	84	5336	912	216	4896	376513	0	224	1259	765	34	8	92	0	621	229	3215	204	20	25	422	616	0	1481	453	2074	1501	3173	52972	19385	0.142
5.3	224.86	7.73	1	0.010269	-0.010571	0.009935	0.07673	96175	1.77	96	592	0	109	3626	939	1398	39269	130	5212	948	245	4927	375459	0	245	1215	840	149	35	82	131	843	47	3175	0	233	20	228	610	59	1543	489	2286	1438	3814	53747	19274	0.142
5.4	225.86	7.73	1	0.010269	-0.010571	0.009935	0.07673	97123	1.74	134	726	0	93	3453	911	1539	40427	0	5465	942	233	4909	381330	48	261	1367	816	114	0	83	48	609	120	3187	0	211	27	154	683	67	1519	628	2232	1536	2214	53683	19552	0.143
5.5	226.86	7.73	1	0.010269	-0.010571	0.009935	0.07673	96091	1.69	69	755	0	98	3553	988	1527	40889	27	5530	919	310	4861	374035	0	233	1188	813	118	20	35	42	724	127	3166	0	45	0	237	619	10	1108	479	2241	1418	2713	53326	19042	0.142
5.6	227.86	7.73	1	0.010269	-0.010571	0.009935	0.07673	96628	1.74	88	796	0	146	3315	961	1519	43316	56	5406	925	328	4933	377341	0	282	1248	729	114	33	0	60	783	221	3259	0	121	113	226	557	66	1246	327	2245	1444	3555	52428	19210	0.142
5.7	228.86	7.73	1	0.010269	-0.010571	0.009935	0.07673	95436	1.8	72	702	0	114	3383	920	1435	40027	78	5175	953	302	4770	371699	0	231	1257	804	35	61	0	214	829	246	3232	0	246	140	246	658	154	1408	278	2150	1303	3372	53184	18988	0.142
5.8	229.86	7.74	1	0.010269	-0.010571	0.009935	0.07673	96511	1.83	77	707	0	88	3270	878	1486	42820	19	5459	961	331	4923	379083	0	352	1289	739	132	133	130	153	660	129	3245	0	0	37	303	615	0	1465	522	2128	1479	2924	53255	19220	0.143
5.9	230.86	7.73	1	0.010269	-0.010571	0.009935	0.07673	95529	1.81	134	821	0	82	3047	917	1557	42252	75	5539	1013	232	4920	376732	0	232	1276	760	129	119	0	72	733	63	3002	126	39	4	163	572	65	1432	779	2456	1346	3296	52511	19289	0.141
6	231.86	7.73	1	0.010269	-0.010571	0.009935	0.07673	96357	1.82	95	726	0	129	3156	950	1534	41711	0	5446	885	287	4834	378203	238	184	1197	708	93	35	0	0	703	141	3172	0	0	49	278	631	115	1493	482	2055	1277	2549	53174	19509	0.142
6.1	232.86	7.75	1	0.010269	-0.010571	0.009935	0.07673	94625	1.87	75	687	0	70	3140	1038	1467	40484	102	5378	918	264	4834	369093	8	275	1292	801	161	26	52	113	844	126	3139	102	76	45	239	687	0	1203	425	2191	1354	2569	53022	19140	0.141
6.2	233.86	7.75	1	0.010269	-0.010571	0.009935	0.07673	95238	1.77	91	630	0	72	3242	957	1510	40083	52	5401	893	336	4895	371172	0	257	1311	725	63	0	14	41	779	158	3146	0	178	47	257	660	83	1297	529	2087	1396	2895	53379	19347	0.142
6.3	234.86	7.74	1	0.010269	-0.010571	0.009935	0.07673	96341	1.82	115	828	0	83	3110	977	1582	43270	0	5410	917	327	4872	375733	0	205	1277	650	125	78	5	51	773	19	3168	127	10	37	299	544	18	1495	635	2225	1391	2912	53606	18914	0.142
6.4	235.86	7.74	1	0.010269	-0.010571	0.009935	0.07673	94938	1.72	113	887	0	56	3005	1002	1458	43487	19	5543	940	300	4701	372633	19	263	1285	759	137	0	203	103	748	70	3175	68	223	21	280	652	0	1436	649	2160	1332	2694	52097	18928	0.141
6.5	236.86	7.74	1	0.010269	-0.010571	0.009935	0.07673	96172	1.76	82	849	0	73	3197	1004	1615	41969	110	5500	936	318	5096	376023	0	223	1223	865	128	0	0	150	821	177	3257	0	124	31	219	694	61	1592	269	2301	1392	3403	53180	19259	0.142
6.6	237.86	7.74	1	0.010269	-0.010571	0.009935	0.07673	94999	1.77	113	717	0	102	3079	992	1426	41839	0	5376	1014	234	4953	371251	0	289	1349	758	83	77	0	34	676	67	2989	53	14	30	188	602	222	1101	415	2352	1421	2686	53260	19238	0.142
6.7	238.86	7.74	1	0.010269	-0.010571	0.009935	0.07673	98272	1.79	98	820	0	89	2965	943	1588	43885	22	5771	913	272	5618	383785	91	242	1253	817	93	0	0	16	795	232	3264	0	0	74	203	652	102	1459	319	2485	1483	2304	54696	19530	0.144
6.8	239.86	7.74	1	0.010269	-0.010571	0.009935	0.07673	93079	1.79	90	684	0	97	3303	948	1427	38809	95	5135	912	247	4622	364251	0	227	1387	745	188	39	0	44	799	132	3005	78	0	82	99	752	27	1368	507	2060	1335	2747	53174	18587	0.14
6.9	240.86	7.73	1	0.010269	-0.010571	0.009935	0.07673	96067	1.81	113	705	0	72	3288	899	1440	40198	0	5531	943	270	4785	374186	0	149	1258	728	203	0	40	9	796	232	3161	63	89	47	152	571	42	1351	222	2249	1470	3390	53354	19258	0.143
7	241.86	7.73	1	0.010269	-0.010571	0.009935	0.07673	96235	1.76	91	693	0	100	3200	971	1593	41570	127	5482	983	374	4812	375790	0	246	1278	637	184	21	55	182	767	227	3254	0	72	16	203	662	0	1492	327	2113	1466	2967	54025	19532	0.143
7.1	242.86	7.74	1	0.010269	-0.010571	0.009935	0.07673	94282	1.79	100	720	0	57	3026	973	1525	41220	129	5296	1038	179	4826	367015	66	245	1426	786	218	0	0	39	827	454	3160	47	275	58	102	652	19	1234	0	1962	1409	2721	52124	19013	0.141
7.2	243.86	7.74	1	0.010269	-0.010571	0.009935	0.07673	94320	1.69	106	668	0	88	3324	986	1420	40894	10	5342	846	281	4740	368537	75	250	1159	680	166	30	72	27	834	200	3235	0	216	0	256	627	0	1404	389	2114	1423	2868	52426	19115	0.141
7.3	244.86	7.74	1	0.010269	-0.010571	0.009935	0.07673	96318	1.78	118	680	0	62	3193	952	1400	41142	0	5538	943	260	4865	378232	0	231	1258	719	268	36	189	162	729	194	3145	84	100	0	166	649	0	1388	430	2250	1382	2860	53497	19081	0.142
7.4	245.86	7.72	1	0.010269	-0.010571	0.009935	0.07673	97836	1.86	70	763	0	80	3233	981	1582	42494	32	5632	983	273	5010	383848	0	268	1297	786	175	65	0	71	814	245	3173	0	101	10	163	610	140	1291	410	2473	1405	2661	54049	19462	0.144
7.5	246.86	7.73	1	0.010269	-0.010571	0.009935	0.07673	94024	1.78	95	812	0	36	2945	932	1442	40740	81	5317	999	274	4704	364406	0	277	1119	648	66	0	0	116	770	249	3059	0	13	0	236	622	53	1387	282	2119	1454	3744	53893	19249	0.141
7.6	247.86	7.73	1	0.010269	-0.010571	0.009935	0.07673	95824	1.77	103	846	0	46	2899	950	1599	42694	17	5469	1018	255	4768	374366	0	245	1216	685	5	0	0	81	762	0	3129	52	0	12	246	585	52	1364	512	2254	1515	2987	53593	19024	0.142
7.7	248.86	7.73	1	0.010269	-0.010571	0.009935	0.07673	98405	1.8	128	916	0	76	3009	967	1578	44631	39	5934	1047	303	5443	385139	0	243	1342	692	88	16	49	25	641	49	3137	40	74	0	274	565	28	1524	510	2529	1400	2769	53651	19351	0.144
7.8	249.86	7.73	1	0.010269	-0.010571	0.009935	0.07673	95546	1.93	107	854	0	78	2973	948	1570	42628	56	5654	1062	307	4894	375260	0	244	1289	725	90	35	73	131	862	252	3133	0	80	31	245	721	204	1327	277	2141	1436	3245	52940	18955	0.142
7.9	250.86	7.73	1	0.010269	-0.010571	0.009935	0.07673	94205	1.7	100	880	0	64	2817	881	1480	43100	89	5349	894	243	4773	367253	0	239	1338	718	93	0	0	11	658	372	3028	0	149	49	278	635	8	1368	0	2167	1362	2677	52767	18984	0.141
8	251.86	7.73	1	0.010269	-0.010571	0.009935	0.07673	95459	1.8	116	810	0	74	2917	941	1551	42609	104	5639	1007	281	4726	374436	0	256	1162	714	63	0	57	0	701	247	3080	0	81	0	249	635	9	1251	233	2228	1379	2899	52222	19011	0.142
8.1	252.86	7.73	1	0.010269	-0.010571	0.009935	0.07673	95648	1.78	109	834	0	75	3057	925	1564	41954	43	5395	1001	280	4899	373044	77	269	1256	786	221	0	0	93	751	275	3234	0	0	133	219	713	98	1320	283	1987	1389	2732	53193	19403	0.142
8.2	253.86	7.74	1	0.010269	-0.010571	0.009935	0.07673	96272	1.86	116	795	0	76	3139	965	1513	42001	50	5472	970	323	5487	374773	0	241	1309	812	142	22	51	0	739	283	3163	0	225	25	241	633	0	1469	289	2285	1474	3130	54611	19156	0.143
8.3	254.86	7.74	1	0.010269	-0.010571	0.009935	0.07673	96383	1.87	117	782	0	57	3105	1000	1499	42148	0	5499	964	293	5146	375724	140	301	1400	773	206	7	0	26	756	290	3191	69	0	78	78	666	152	1355	367	2086	1395	2434	53797	19584	0.143
8.4	255.86	7.72	1	0.010269	-0.010571	0.009935	0.07673	96901	1.86	105	904	0	89	2637	948	1643	44086	77	5571	1003	192	4998	380808	0	222	1291	746	159	0	0	74	630	184	3225	0	17	7	229	592	140	1321	248	2269	1324	3058	53816	19089	0.143
8.5	256.86	7.73	1	0.010269	-0.010571	0.009935	0.07673	98088	1.96	135	1010	0	53	2889	936	1627	45108	61	5783	1005	223	5040	386098	0	262	1361	897	186	88	12	184	867	175	3149	277	104	0	290	600	134	1534	410	2159	1450	2767	54308	19149	0.143
8.6	257.86	7.74	1	0.010269	-0.010571	0.009935	0.07673	94081	1.73	94	930	0	68	2594	940	1537	43256	70	5502	869	208	4795	365035	0	235	1270	758	158	41	0	192	825	92	3160	104	0	82	233	610	5	1402	544	2025	1375	2947	53941	18959	0.141
8.7	258.86	7.72	1	0.010269	-0.010571	0.009935	0.07673	95178	1.84	112	989	0	79	2676	958	1592	44542	91	5774	931	339	5390	371697	0	246	1204	723	15	17	0	128	754	288	3065	0	133	38	174	560	160	1591	197	2354	1307	3189	51895	19135	0.141
8.8	259.86	7.72	1	0.010269	-0.010571	0.009935	0.07673	96305	1.91	142	1022	0	96	2722	1013	1537	44868	74	5739	974	269	4898	378579	0	199	1240	718	83	0	6	134	763	223	3144	62	31	11	227	635	0	1489	446	2347	1279	2599	52995	18986	0.142
8.9	260.86	7.73	1	0.010269	-0.010571	0.009935	0.07673	97034	1.91	117	1033	0	64	2809	939	1590	45427	0	5710	947	262	4976	382364	0	223	1287	799	212	0	0	118	713	264	3212	0	45	46	162	629	107	1492	238	2509	1486	2642	52911	19002	0.142
9	261.86	7.73	1	0.010269	-0.010571	0.009935	0.07673	98945	1.88	115	1033	0	73	2719	958	1663	45512	92	5911	953	292	5111	391141	12	276	1344	888	171	60	0	49	660	422	3266	0	0	37	238	601	159	1451	289	2342	1464	2526	53920	19819	0.143
9.1	262.86	7.73	1	0.010269	-0.010571	0.009935	0.07673	96628	1.83	153	1060	0	56	2717	965	1577	45835	53	5896	1039	201	5096	385790	0	222	1525	837	105	0	99	63	693	263	3021	0	196	62	237	542	26	1296	282	2439	1336	2696	50926	18786	0.14
9.2	263.86	7.72	1	0.010269	-0.010571	0.009935	0.07673	95117	1.85	142	1037	0	75	2580	953	1555	44746	83	5447	946	260	5009	373035	0	230	1200	761	120	68	38	184	677	313	3181	127	74	0	204	611	0	1372	394	2250	1446	2707	52758	19190	0.142
9.3	264.86	7.73	1	0.010269	-0.010571	0.009935	0.07673	99393	1.9	130	1036	0	85	2857	1016	1655	46875	114	5735	945	299	5038	389515	0	251	1381	764	245	0	0	72	675	354	3231	0	0	46	113	666	87	1414	194	2487	1424	2378	54761	19671	0.144
9.4	265.86	7.71	1	0.010269	-0.010571	0.009935	0.07673	99330	1.85	139	1052	0	43	2907	994	1683	45540	66	5913	968	325	5154	390960	0	350	1414	828	63	23	0	38	719	0	3303	0	95	0	250	607	239	1204	463	2525	1517	2803	54390	19648	0.143
9.5	266.86	7.71	1	0.010269	-0.010571	0.009935	0.07673	95801	1.83	157	1035	0	105	2731	980	1614	43973	24	5549	960	329	4887	376674	0	245	1302	875	270	60	0	231	925	260	3294	0	190	56	169	573	125	1237	565	2533	1499	2428	52935	19153	0.141
9.6	267.86	7.7	1	0.010269	-0.010571	0.009935	0.07673	95166	1.77	113	1016	0	68	2677	1052	1617	43050	68	5724	1010	218	5161	372952	0	209	1355	654	147	43	0	70	805	106	3281	145	54	13	205	692	162	1333	683	2132	1270	2921	53260	19234	0.142
9.7	268.86	7.7	1	0.010269	-0.010571	0.009935	0.07673	95649	1.94	92	965	0	75	2857	1035	1535	43970	104	5594	1009	266	4742	374014	0	260	1303	732	193	191	51	215	779	136	3138	0	118	0	211	574	112	1459	459	2116	1338	3304	52580	19020	0.142
9.8	269.86	7.69	1	0.010269	-0.010571	0.009935	0.07673	95569	1.74	119	1004	0	56	2695	999	1554	44141	5	5666	826	254	4740	374342	0	228	1220	662	129	0	0	105	819	213	3244	0	214	72	205	617	243	1314	485	2400	1346	2931	53459	19416	0.141
9.9	270.86	7.69	1	0.010269	-0.010571	0.009935	0.07673	94133	1.9	127	996	0	102	2698	971	1602	43631	38	5561	956	244	4827	368707	19	215	1184	825	187	0	0	157	768	104	3170	0	76	30	235	608	31	1365	591	2363	1312	2600	52948	18893	0.14
10	271.86	7.7	1	0.010269	-0.010571	0.009935	0.07673	95492	1.8	124	950	0	65	2623	1022	1534	43452	59	5658	983	235	4865	374746	395	279	1288	772	158	48	80	133	669	68	3055	57	186	46	243	621	0	1579	509	2201	1374	2062	52506	18969	0.142
10.1	272.86	7.69	1	0.010269	-0.010571	0.009935	0.07673	96225	1.83	132	959	0	73	2615	940	1667	44890	88	5765	905	229	4965	379310	0	245	1328	799	208	37	0	161	719	146	3075	56	90	80	180	707	54	1354	383	2356	1363	3135	51989	18963	0.142
10.2	273.86	7.7	1	0.010269	-0.010571	0.009935	0.07673	96580	1.93	119	999	0	84	2730	1028	1588	44531	66	5868	1067	239	4841	379043	31	188	1251	653	180	0	0	102	812	251	3135	0	64	0	225	671	0	1313	370	2197	1366	2553	53193	19613	0.142
10.3	274.86	7.69	1	0.010269	-0.010571	0.009935	0.07673	93903	1.82	120	948	0	109	2658	910	1547	43073	20	5541	864	239	4799	367156	0	188	1287	758	0	0	0	176	753	59	3057	30	77	55	272	559	86	1382	499	2225	1453	2425	52244	19244	0.141
10.4	275.86	7.69	1	0.010269	-0.010571	0.009935	0.07673	93014	1.8	99	994	0	79	2661	929	1536	41769	20	5555	919	177	5166	363751	0	256	1270	719	240	0	0	104	843	280	3107	143	94	9	103	651	84	1125	359	2254	1294	2832	52253	19055	0.14
10.5	276.86	7.68	1	0.010269	-0.010571	0.009935	0.07673	96824	1.87	106	910	0	55	2830	986	1603	44476	111	5646	1033	221	4950	380434	0	287	1235	714	184	70	21	34	863	279	3161	14	146	36	205	578	137	1362	427	2447	1352	2524	54174	19407	0.142
10.6	277.86	7.69	1	0.010269	-0.010571	0.009935	0.07673	95270	1.84	107	968	0	70	2684	1026	1464	44235	48	5524	994	249	4858	372774	0	239	1228	785	73	17	0	104	722	172	3119	17	168	30	269	538	132	1346	562	2140	1304	2648	52929	19342	0.141
10.7	278.86	7.69	1	0.010269	-0.010571	0.009935	0.07673	94874	1.86	108	886	0	66	2747	1049	1564	42627	58	5521	939	331	4840	369612	173	248	1251	741	137	0	45	62	805	0	3115	88	113	65	274	635	45	1396	684	2118	1334	2158	53814	19138	0.142
10.8	279.86	7.69	1	0.010269	-0.010571	0.009935	0.07673	96331	1.89	144	916	0	53	2726	1018	1610	43510	85	5582	990	261	5354	376777	0	269	1354	813	143	54	214	108	693	346	3141	19	5	82	160	575	0	1556	224	2546	1317	2447	53384	19294	0.142
10.9	280.86	7.68	1	0.010269	-0.010571	0.009935	0.07673	93681	1.82	99	947	0	116	2783	1015	1492	42372	17	5220	973	261	4722	365095	0	255	1238	780	116	16	0	93	672	404	3119	0	0	106	118	703	163	1280	93	2113	1366	2665	52062	18910	0.141
11	281.86	7.69	1	0.010269	-0.010571	0.009935	0.07673	94305	1.85	129	936	0	61	2794	1026	1518	42543	114	5205	1111	204	4818	369561	0	286	1409	803	219	0	0	34	841	225	3087	0	68	103	190	621	87	1330	180	2057	1399	2613	51903	18920	0.141
11.1	282.86	7.69	1	0.010269	-0.010571	0.009935	0.07673	92413	1.8	131	976	0	77	2578	951	1566	42665	0	5298	930	240	4610	360482	62	286	1179	739	184	44	8	37	610	226	3101	27	126	33	298	553	0	1331	242	2276	1480	2097	52127	19090	0.14
11.2	283.86	7.68	1	0.010269	-0.010571	0.009935	0.07673	94917	1.94	159	959	0	85	2650	933	1514	44708	49	5488	1025	296	4888	372400	68	216	1376	786	143	20	0	137	602	183	3059	0	226	45	205	566	108	1412	311	2259	1410	2231	52721	19389	0.141
11.3	284.86	7.68	1	0.010269	-0.010571	0.009935	0.07673	95530	1.98	101	1053	0	32	2524	974	1626	44249	48	5470	1068	224	4963	375560	0	216	1237	648	24	0	27	83	718	273	3182	0	0	91	319	553	17	1547	308	2412	1333	2506	52864	19217	0.141
11.4	285.86	7.68	1	0.010269	-0.010571	0.009935	0.07673	94498	1.86	102	981	0	70	2724	1000	1576	44504	73	5573	915	239	4870	370372	198	197	1338	790	58	0	41	50	716	0	3291	0	28	46	318	617	105	1295	654	2328	1371	2011	52405	19116	0.14
11.5	286.86	7.67	1	0.010269	-0.010571	0.009935	0.07673	94331	1.96	120	927	0	36	2649	997	1531	42996	194	5440	900	252	5377	367320	0	191	1129	697	55	60	0	251	797	98	3171	84	144	37	312	592	20	1474	519	2164	1355	2541	52370	18902	0.141
11.6	287.86	7.67	1	0.010269	-0.010571	0.009935	0.07673	94528	1.7	149	995	0	69	2516	979	1542	44219	75	5646	934	232	4791	371760	0	248	1298	701	179	0	0	0	747	105	3060	121	159	70	101	537	12	1309	253	2168	1317	2865	52043	19065	0.141
11.7	288.86	7.67	1	0.010269	-0.010571	0.009935	0.07673	95898	1.87	136	1082	0	81	2627	988	1589	45072	56	5818	931	256	4905	377168	0	268	1263	717	109	122	0	210	707	197	3266	50	256	26	250	643	106	1455	284	2234	1440	3356	52478	18896	0.142
11.8	289.86	7.68	1	0.010269	-0.010571	0.009935	0.07673	93911	1.69	108	939	0	85	2497	1063	1617	44390	36	5482	982	229	4785	368318	0	240	1238	715	180	0	31	78	790	227	3199	39	177	35	225	625	141	1474	516	2154	1287	2605	51552	18662	0.14
11.9	290.86	7.67	1	0.010269	-0.010571	0.009935	0.07673	94987	1.94	160	994	0	125	2705	957	1625	43540	58	5593	870	313	4714	372754	0	117	1189	747	198	6	28	91	742	307	3048	0	0	131	243	605	0	1481	77	2408	1321	2495	52124	18927	0.141
12	291.86	7.67	1	0.010269	-0.010571	0.009935	0.07673	95323	1.81	114	900	0	95	2712	961	1534	43319	0	5640	942	290	4917	375727	56	194	1276	812	133	59	14	120	786	167	2986	87	126	54	253	593	33	1406	330	2017	1447	2567	52791	18856	0.141
12.1	292.86	7.67	1	0.010269	-0.010571	0.009935	0.07673	95036	1.77	117	851	0	42	2888	1014	1498	42596	54	5310	925	229	4900	371398	0	247	1238	705	24	0	0	67	760	488	3035	88	182	30	218	670	32	1540	214	2192	1323	2982	52242	19238	0.141
12.2	293.86	7.67	1	0.010269	-0.010571	0.009935	0.07673	96242	1.81	128	936	0	0	2738	1000	1580	44486	0	5500	1009	180	4874	378517	179	275	1346	839	64	9	0	54	817	0	3135	40	64	19	235	701	170	1404	612	2289	1549	2434	52443	19018	0.142
12.3	294.86	7.66	1	0.010269	-0.010571	0.009935	0.07673	94267	1.78	96	966	0	86	2591	1000	1557	42999	58	5435	892	307	4852	369557	0	252	1298	720	179	24	0	0	698	74	3160	39	101	86	151	627	136	1276	486	2124	1446	3231	52532	19108	0.14
12.4	295.86	7.67	1	0.010269	-0.010571	0.009935	0.07673	93032	1.76	134	867	0	99	2642	1007	1449	42345	44	5395	966	283	4709	361463	30	255	1243	762	149	42	0	160	705	147	3073	0	96	15	241	656	56	1626	578	2182	1412	2119	51835	19155	0.14
12.5	296.86	7.66	1	0.010269	-0.010571	0.009935	0.07673	96311	1.8	132	876	0	72	2960	1019	1608	43836	50	5420	812	297	4824	375821	301	218	1311	809	93	14	0	112	937	0	3177	80	182	108	234	711	211	1340	719	2218	1391	2013	53574	19371	0.142
12.6	297.86	7.66	1	0.010269	-0.010571	0.009935	0.07673	96943	1.73	125	899	0	53	2918	846	1639	43405	6	5664	955	321	4892	381001	0	251	1290	827	81	0	0	177	816	329	3176	0	108	12	235	637	153	1414	357	2131	1284	2776	52754	19216	0.142
12.7	298.86	7.66	1	0.010269	-0.010571	0.009935	0.07673	93944	1.87	100	903	0	74	2708	1024	1608	41672	77	5390	936	222	4731	366593	31	215	1187	658	24	0	0	94	836	179	3057	0	104	73	251	631	163	1291	503	2036	1395	2680	52400	18699	0.141
12.8	299.86	7.66	1	0.010269	-0.010571	0.009935	0.07673	94374	1.88	112	966	0	67	2494	972	1576	43872	105	5654	923	246	4845	368824	0	264	1274	732	73	9	0	8	651	371	3090	0	51	18	266	528	0	1271	0	2057	1393	3349	52801	19175	0.141
12.9	300.86	7.66	1	0.010269	-0.010571	0.009935	0.07673	95929	1.88	71	989	0	64	2645	940	1525	43973	21	5699	906	282	4852	375944	123	243	1246	826	109	13	58	151	715	153	3076	0	231	63	304	661	30	1260	277	2205	1422	2399	53088	19441	0.142
13	301.86	7.66	1	0.010269	-0.010571	0.009935	0.07673	94988	1.88	131	1003	0	83	2476	982	1482	44095	77	5577	976	188	4892	370375	0	270	1332	783	195	12	11	32	729	309	3029	0	0	97	195	591	0	1462	143	2083	1503	2685	52686	19198	0.142
13.1	302.86	7.65	1	0.010269	-0.010571	0.009935	0.07673	94172	1.83	91	959	0	78	2469	933	1601	43380	0	5713	958	266	4658	369507	0	263	1267	703	69	0	0	47	686	135	3129	0	341	32	177	556	203	1117	571	2191	1371	2379	52839	19446	0.141
13.2	303.86	7.65	1	0.010269	-0.010571	0.009935	0.07673	95852	1.84	77	1031	0	45	2501	987	1573	45185	71	5669	1008	265	4917	375670	98	296	1172	773	137	0	0	174	785	291	3320	43	122	54	255	586	143	1318	244	2353	1412	2062	53647	19363	0.142
13.3	304.86	7.64	1	0.010269	-0.010571	0.009935	0.07673	98622	1.93	122	1137	0	79	2479	968	1638	46972	70	6001	973	273	5058	390091	0	214	1349	905	153	0	77	21	864	456	3349	0	113	56	163	704	0	1666	274	2236	1475	2662	53822	19283	0.143
13.4	305.86	7.65	1	0.010269	-0.010571	0.009935	0.07673	95483	1.85	154	990	0	61	2539	1063	1595	45473	46	5687	938	280	4978	373262	0	250	1436	765	162	0	51	254	624	367	3216	0	232	30	217	553	0	1508	113	2191	1438	2760	52835	18971	0.142
13.5	306.86	7.64	1	0.010269	-0.010571	0.009935	0.07673	92391	1.84	127	963	0	68	2265	927	1619	44116	8	5398	955	233	4537	359456	0	183	1260	725	82	0	0	54	759	143	2962	51	144	58	252	591	14	1173	518	2264	1315	3199	52644	18891	0.14
13.6	307.86	7.64	1	0.010269	-0.010571	0.009935	0.07673	95990	1.83	102	1033	0	41	2464	962	1624	44430	13	5597	974	219	4870	377785	7	284	1312	788	149	5	0	19	777	169	3152	0	133	110	174	650	142	1305	384	2398	1458	2461	52825	19085	0.142
13.7	308.86	7.63	1	0.010269	-0.010571	0.009935	0.07673	96740	1.93	130	1040	0	47	2573	942	1720	45370	29	5593	976	300	4935	380413	0	248	1277	785	71	95	56	209	794	199	3309	0	0	39	250	502	37	1375	552	2174	1528	2952	52605	19271	0.142
13.8	309.86	7.63	1	0.010269	-0.010571	0.009935	0.07673	96567	1.9	150	1045	0	76	2490	943	1594	45567	79	5776	985	279	4928	381003	0	308	1210	781	93	49	64	142	768	175	3140	0	108	7	311	633	0	1473	572	2333	1493	3189	52817	19384	0.142
13.9	310.86	7.63	1	0.010269	-0.010571	0.009935	0.07673	95729	1.74	166	1016	0	59	2406	1029	1637	44506	0	5635	966	248	4811	373113	0	283	1294	761	70	51	0	154	748	328	3122	0	0	52	181	648	203	1366	238	2451	1294	3180	53856	19233	0.143
14	311.86	7.63	1	0.010269	-0.010571	0.009935	0.07673	95772	1.88	130	1071	0	49	2408	933	1539	44544	27	5753	945	227	4770	375848	0	187	1288	778	213	0	20	126	856	179	3137	0	172	28	229	557	119	1550	319	2280	1332	3023	52382	18728	0.141
14.1	312.86	7.62	1	0.010269	-0.010571	0.009935	0.07673	92649	1.87	89	993	0	43	2333	953	1543	42874	73	5458	878	257	4805	362648	0	229	1230	788	54	0	27	113	748	238	3123	14	185	42	290	572	160	1140	271	2284	1383	2456	51720	18859	0.139
14.2	313.86	7.62	1	0.010269	-0.010571	0.009935	0.07673	95622	1.82	138	1039	0	75	2483	894	1551	45332	0	5689	905	302	4881	373721	0	250	1308	766	86	22	115	25	753	193	3180	0	106	28	190	568	0	1416	412	2239	1422	2698	52353	18849	0.143
14.3	314.86	7.63	1	0.010269	-0.010571	0.009935	0.07673	94416	1.9	128	1016	0	50	2387	902	1623	44477	97	5641	872	266	4752	370380	57	209	1154	734	154	52	0	123	723	318	3080	74	0	58	262	470	58	1277	334	2246	1383	2079	52865	18857	0.141
14.4	315.86	7.62	1	0.010269	-0.010571	0.009935	0.07673	91228	1.72	99	992	0	27	2359	921	1471	43357	73	5376	899	266	4808	354533	35	238	1173	713	112	0	54	91	792	104	3130	63	136	48	176	515	0	1346	515	2137	1338	2270	51930	18806	0.139
14.5	316.86	7.62	1	0.010269	-0.010571	0.009935	0.07673	96468	1.82	129	1027	0	73	2662	961	1694	44942	48	5691	930	316	4985	380495	0	252	1406	783	136	13	119	119	652	179	3165	87	0	41	237	593	26	1412	374	2298	1343	3119	53074	19181	0.141
14.6	317.86	7.62	1	0.010269	-0.010571	0.009935	0.07673	97363	1.91	98	1028	0	67	2535	955	1713	46057	46	5916	950	290	4994	385638	0	244	1360	713	124	0	25	89	731	219	3145	26	127	28	111	660	63	1506	602	2518	1446	2684	52619	19143	0.142
14.7	318.86	7.62	1	0.010269	-0.010571	0.009935	0.07673	94884	1.8	89	1025	0	91	2476	953	1560	44485	41	5705	823	233	4856	372645	25	250	1261	853	79	0	95	0	781	387	3170	7	0	45	282	671	0	1326	311	2151	1289	2552	52541	19185	0.141
14.8	319.86	7.62	1	0.010269	-0.010571	0.009935	0.07673	96466	1.75	113	1033	0	77	2550	981	1636	45689	39	5850	953	200	4933	381420	0	245	1296	849	66	88	16	229	895	247	3315	148	41	33	321	617	92	1252	533	2316	1482	2988	52755	19346	0.141
14.9	320.86	7.62	1	0.010269	-0.010571	0.009935	0.07673	96959	1.92	127	1137	0	79	2314	932	1785	46382	0	5783	994	254	5068	384645	0	248	1245	815	117	91	60	106	738	175	3192	0	0	0	242	621	0	1537	586	2214	1411	2702	52481	18794	0.142
15	321.86	7.61	1	0.010269	-0.010571	0.009935	0.07673	95828	1.83	161	1027	0	44	2418	949	1645	45816	57	5711	1088	203	5920	380071	0	289	1302	820	65	0	0	0	653	144	3191	0	134	40	156	630	149	1475	422	2406	1406	2738	51751	18803	0.141
15.1	322.86	7.61	1	0.010269	-0.010571	0.009935	0.07673	99757	1.9	117	1189	0	10	2509	947	1762	47963	63	6239	993	252	6137	399445	73	287	1337	808	230	67	59	50	728	97	3255	20	81	94	188	555	0	1586	505	2574	1366	2264	52465	19452	0.143
15.2	323.86	7.6	1	0.010269	-0.010571	0.009935	0.07673	94190	1.89	111	1093	0	63	2264	909	1547	45277	14	5642	935	236	4857	375685	0	188	1171	682	54	29	29	0	601	265	2914	0	126	79	291	564	0	1432	397	2375	1323	2459	50448	18581	0.139
15.3	324.86	7.61	1	0.010269	-0.010571	0.009935	0.07673	91295	1.69	134	999	9	71	2342	933	1564	44049	86	5294	987	202	4661	356265	0	255	1303	728	249	47	0	79	727	227	2992	0	0	86	138	644	76	1289	429	2149	1228	2457	51567	18772	0.138
15.4	325.86	7.61	1	0.010269	-0.010571	0.009935	0.07673	98679	1.82	135	1181	0	0	2469	945	1675	45675	106	5870	1069	230	5081	388873	0	198	1246	799	42	0	123	55	612	217	3312	46	7	36	230	658	89	1667	644	2390	1489	2529	53937	20106	0.144
15.5	326.86	7.62	1	0.010269	-0.010571	0.009935	0.07673	103039	1.95	172	1116	0	91	2774	968	1786	49609	81	6022	1001	362	5347	407719	0	295	1295	807	141	0	73	98	838	223	3349	26	211	41	218	684	92	1659	370	2453	1461	3004	54662	20208	0.147
15.6	327.86	7.62	1	0.010269	-0.010571	0.009935	0.07673	99471	1.89	146	1143	0	83	2565	998	1671	47363	21	6056	1096	311	5033	392947	0	295	1300	798	133	44	0	92	692	369	3370	11	34	40	139	648	157	1212	112	2368	1568	2572	54198	19144	0.144
15.7	328.86	7.62	1	0.010269	-0.010571	0.009935	0.07673	95149	1.83	129	1079	0	56	2384	1015	1650	44304	103	5600	978	258	5056	375310	98	286	1339	854	193	50	59	71	747	198	3169	0	27	66	212	585	97	1246	324	2131	1450	2570	52131	19014	0.141
15.8	329.86	7.6	1	0.010269	-0.010571	0.009935	0.07673	96971	1.86	76	1037	0	65	2464	917	1611	46487	98	5868	1090	225	4952	382278	0	226	1291	866	174	100	0	45	787	336	3070	0	246	56	284	621	55	1381	534	2345	1382	2710	52898	19284	0.142
15.9	330.86	7.6	1	0.010269	-0.010571	0.009935	0.07673	97396	1.84	145	1032	0	50	2392	896	1705	46048	47	5788	1010	277	5066	385468	0	239	1355	808	262	136	0	61	664	178	3066	9	0	51	194	646	28	1298	229	2384	1506	2726	52689	19152	0.142
16	331.86	7.61	1	0.010269	-0.010571	0.009935	0.07673	94387	1.8	125	994	0	60	2403	937	1562	43975	31	5742	917	211	4690	370658	0	192	1180	745	84	36	0	95	712	46	3011	63	30	70	225	596	59	1351	663	2200	1351	2732	52081	18752	0.141
16.1	332.86	7.61	1	0.010269	-0.010571	0.009935	0.07673	94803	1.85	129	1021	0	101	2467	985	1607	44265	0	5706	896	291	4823	372668	0	206	1279	857	117	0	0	205	724	298	3030	0	170	35	128	566	4	1295	298	2345	1415	2420	52023	18841	0.141
16.2	333.86	7.61	1	0.010269	-0.010571	0.009935	0.07673	94102	1.85	92	988	0	52	2384	1096	1585	44587	0	5573	861	253	4893	367964	0	263	1375	712	120	6	0	44	804	120	3123	6	164	44	197	529	141	1079	601	2226	1439	2943	52697	19059	0.141
16.3	334.86	7.61	1	0.010269	-0.010571	0.009935	0.07673	93770	1.83	121	988	4	55	2356	1066	1613	43287	39	5633	892	271	5466	367107	61	257	1239	725	94	0	45	202	747	413	3184	0	0	83	209	513	49	1283	0	2252	1257	2306	52385	18799	0.14
16.4	335.86	7.61	1	0.010269	-0.010571	0.009935	0.07673	95402	1.85	124	1013	0	22	2432	978	1565	45718	77	5609	1019	207	4916	375525	15	232	1333	709	141	0	0	92	793	121	3207	53	198	29	150	631	166	1298	564	2105	1440	2667	51933	18655	0.141
16.5	336.86	7.61	1	0.010269	-0.010571	0.009935	0.07673	92331	1.7	115	977	0	41	2308	1037	1547	43227	114	5366	860	269	4735	360306	0	293	1240	817	185	0	31	123	666	191	2986	30	0	68	92	551	0	1244	336	2195	1339	2700	51668	19113	0.14
16.6	337.86	7.61	1	0.010269	-0.010571	0.009935	0.07673	93716	1.88	84	1031	0	64	2360	905	1510	43858	49	5560	893	275	4658	364782	0	260	1224	657	86	0	0	173	659	253	3097	56	139	30	231	522	86	1326	353	2134	1330	3263	52932	19149	0.141
16.7	338.86	7.6	1	0.010269	-0.010571	0.009935	0.07673	102504	1.89	113	1148	0	70	2636	993	1767	48245	30	6247	1117	188	5177	399953	68	296	1523	982	115	0	53	31	736	307	3453	85	0	0	119	696	31	1502	470	2614	1569	2196	56725	19810	0.147
16.8	339.86	7.6	1	0.010269	-0.010571	0.009935	0.07673	100312	1.93	134	1116	0	52	2519	1073	1774	49260	93	6027	1085	233	5152	396559	0	249	1316	836	156	54	64	140	738	112	3118	211	90	38	250	574	0	1767	437	2646	1322	3198	54152	19384	0.145
16.9	340.86	7.6	1	0.010269	-0.010571	0.009935	0.07673	92212	1.81	112	978	0	73	2304	1041	1509	43309	0	5434	941	259	4897	360192	0	278	1360	718	41	0	0	0	717	15	2890	0	0	71	184	726	166	1345	709	2075	1279	2614	51261	18829	0.139
17	341.86	7.59	1	0.010269	-0.010571	0.009935	0.07673	93739	1.68	165	1042	0	72	2265	1037	1529	43757	0	5591	856	267	5326	366620	0	289	1325	753	159	97	0	0	719	46	3013	77	0	37	159	650	174	1220	596	1903	1439	3177	53088	18985	0.14
17.1	342.86	7.6	1	0.010269	-0.010571	0.009935	0.07673	94423	1.79	115	969	0	34	2373	998	1552	43465	39	5778	941	275	4833	368546	0	245	1227	836	75	0	0	64	846	321	3077	25	0	20	255	556	100	1259	258	2335	1394	2851	52971	19043	0.141
17.2	343.86	7.6	1	0.010269	-0.010571	0.009935	0.07673	92639	1.78	138	1008	0	68	2306	1058	1573	42538	9	5521	1061	257	4607	361966	0	255	1245	739	36	0	0	110	739	256	3020	127	73	0	230	535	36	1225	181	2354	1308	2885	52452	18961	0.14
17.3	344.86	7.6	1	0.010269	-0.010571	0.009935	0.07673	89868	1.78	141	979	0	94	2268	1086	1489	42191	96	5239	907	288	4603	349569	0	192	1220	746	73	58	0	143	703	72	3002	10	141	96	306	570	53	1159	435	1977	1324	2962	51282	18574	0.138
17.4	345.86	7.59	1	0.010269	-0.010571	0.009935	0.07673	92705	1.93	110	1088	0	39	2301	970	1578	43889	74	5506	946	277	4783	364421	0	271	1354	746	151	0	0	31	794	224	2855	133	23	85	184	567	5	1335	356	2140	1383	2661	51893	18874	0.14
17.5	346.86	7.59	1	0.010269	-0.010571	0.009935	0.07673	90931	1.83	125	913	0	51	2231	1010	1555	42449	43	5464	877	259	4678	359638	0	231	1325	652	124	0	0	30	703	196	3013	0	0	25	136	607	73	1246	543	2038	1276	2793	51525	18642	0.137
17.6	347.86	7.59	1	0.010269	-0.010571	0.009935	0.07673	91423	1.81	115	993	0	39	2171	1058	1530	43536	79	5576	966	209	4695	360098	0	244	1192	683	161	0	43	85	695	205	3070	0	107	25	264	574	0	1448	308	2298	1273	2911	51849	18573	0.138
17.7	348.86	7.58	1	0.010269	-0.010571	0.009935	0.07673	89420	1.83	143	1027	0	70	2060	989	1522	41293	0	5191	866	243	4535	350944	0	248	1227	717	82	28	0	70	771	207	2981	0	7	65	207	573	150	1314	409	1976	1300	2569	51100	18569	0.137
17.8	349.86	7.59	1	0.010269	-0.010571	0.009935	0.07673	91116	1.83	123	1003	0	71	2081	980	1509	43328	124	5500	792	251	4675	357369	107	247	1325	733	72	0	0	4	712	178	3020	93	66	64	175	545	51	1101	359	2106	1383	2710	52043	18854	0.139
17.9	350.86	7.6	1	0.010269	-0.010571	0.009935	0.07673	92663	1.84	117	1061	0	66	2298	1081	1468	44645	51	5478	964	238	4789	361370	92	303	1225	755	93	0	0	46	774	133	3136	60	0	0	263	572	210	1373	454	2111	1459	2432	52734	18612	0.14
18	351.86	7.6	1	0.010269	-0.010571	0.009935	0.07673	94323	1.76	61	1012	0	38	2325	1034	1556	44304	85	5520	991	185	5123	369805	0	262	1296	768	73	0	0	73	648	149	3070	84	64	41	156	559	44	1398	335	2267	1415	2745	52527	19185	0.14
18.1	352.86	7.58	1	0.010269	-0.010571	0.009935	0.07673	93432	1.9	88	968	0	80	2331	1004	1620	43145	99	5589	952	220	4774	366465	14	245	1340	710	101	0	0	47	777	43	3059	0	0	61	168	619	113	1306	473	2259	1370	2560	52274	18873	0.14
18.2	353.86	7.57	1	0.010269	-0.010571	0.009935	0.07673	91237	1.9	147	981	0	118	2447	1001	1647	42112	71	5439	856	246	4584	355897	0	237	1166	673	69	23	0	74	796	258	3124	14	83	50	188	490	251	1231	376	2182	1340	3028	51255	18615	0.139
18.3	354.86	7.57	1	0.010269	-0.010571	0.009935	0.07673	87962	1.74	79	936	0	68	2061	985	1541	39706	0	5008	843	242	4404	337539	26	245	1170	678	78	11	0	110	684	258	2991	47	290	103	257	464	187	1240	339	2068	1245	2091	52174	18715	0.138
18.4	355.86	7.58	1	0.010269	-0.010571	0.009935	0.07673	88699	1.72	88	980	0	49	2139	907	1455	39425	26	5038	844	214	4417	332883	169	263	1142	635	66	45	0	171	707	404	3223	34	202	73	143	558	118	1224	201	1917	1235	1891	54445	19200	0.141
18.5	356.86	7.58	1	0.010269	-0.010571	0.009935	0.07673	107506	2.07	166	1244	0	34	2747	983	1923	53202	0	6447	1142	279	5474	421887	24	262	1391	921	51	0	0	69	894	54	3438	56	0	0	267	642	138	1783	911	2678	1635	2345	58424	20553	0.15
18.6	357.86	7.59	1	0.010269	-0.010571	0.009935	0.07673	94309	1.82	154	1048	0	62	2285	1027	1524	44928	105	5651	905	239	4684	363326	0	253	1244	717	205	0	0	41	684	263	3120	0	0	5	193	455	0	1485	238	2124	1366	2315	55322	19416	0.142
18.7	358.86	7.59	1	0.010269	-0.010571	0.009935	0.07673	93214	1.78	153	965	0	62	2347	1083	1536	42828	31	5541	939	257	4705	358759	254	320	1196	737	140	0	0	173	706	0	3050	78	137	66	225	704	84	1362	599	2275	1358	1814	54090	18978	0.142
18.8	359.86	7.55	1	0.010269	-0.010571	0.009935	0.07673	95488	1.8	117	1102	0	61	2334	1011	1581	45288	0	5734	988	302	4808	372923	287	301	1241	686	224	0	11	88	735	170	3296	0	0	54	186	630	172	1285	445	2225	1437	1887	54392	19146	0.142
18.9	360.86	7.54	1	0.010269	-0.010571	0.009935	0.07673	95073	1.87	147	1102	0	57	2363	933	1699	45192	36	5524	1053	206	4974	371896	107	224	1278	786	41	0	27	42	717	152	3055	0	121	31	208	558	72	1229	520	2362	1373	2524	53278	18624	0.141
19	361.86	7.53	1	0.010269	-0.010571	0.009935	0.07673	92364	1.85	183	995	0	47	2296	902	1557	43144	58	5381	887	311	4510	357318	0	297	1228	800	141	36	0	0	848	165	3167	0	127	40	192	579	178	1215	545	2057	1382	2908	52212	19031	0.14
19.1	362.86	7.55	1	0.010269	-0.010571	0.009935	0.07673	92541	1.85	89	1038	0	33	2450	1003	1563	42582	138	5304	876	229	4647	359399	0	228	1185	698	40	0	20	145	688	279	3121	0	0	34	289	548	105	1363	350	2014	1305	2528	53226	18765	0.14
19.2	363.86	7.55	1	0.010269	-0.010571	0.009935	0.07673	93005	1.81	104	1008	0	87	2352	941	1501	43217	26	5496	1061	196	4822	362307	279	206	1336	768	114	0	101	166	679	378	3140	150	234	0	169	620	0	1327	273	2299	1278	1776	53150	18786	0.14
19.3	364.86	7.56	1	0.010269	-0.010571	0.009935	0.07673	93834	1.72	117	1059	0	76	2385	902	1644	43948	68	5758	964	273	4904	367235	0	310	1283	637	147	0	0	139	717	222	3092	33	192	0	195	568	100	1321	472	2327	1272	2876	52910	19136	0.14
19.4	365.86	7.56	1	0.010269	-0.010571	0.009935	0.07673	95617	1.92	106	1069	0	35	2407	915	1539	44828	73	5613	903	284	4781	374821	77	255	1334	817	153	0	0	116	789	95	3021	0	60	80	224	626	134	1377	595	2148	1485	2354	53322	19155	0.142
19.5	366.86	7.56	1	0.010269	-0.010571	0.009935	0.07673	98295	1.93	139	1088	0	59	2449	948	1816	48602	97	6138	1011	321	4975	390338	71	249	1342	746	125	0	100	13	650	53	3068	68	100	40	198	639	0	1473	640	2217	1493	2367	52869	19038	0.142
19.6	367.86	7.56	1	0.010269	-0.010571	0.009935	0.07673	92611	1.91	136	984	0	29	2222	959	1502	45225	89	5673	1052	240	4859	366203	229	310	1228	764	146	0	67	62	634	285	2894	0	74	29	296	551	61	1432	220	2395	1369	1879	51126	18368	0.138
19.7	368.86	7.56	1	0.010269	-0.010571	0.009935	0.07673	92165	1.81	91	944	0	35	2138	956	1577	43711	42	5556	947	299	4671	364208	0	228	1095	733	86	0	41	0	670	233	2840	82	76	51	308	563	0	1311	228	2227	1334	2792	51785	18444	0.139
19.8	369.86	7.57	1	0.010269	-0.010571	0.009935	0.07673	90438	1.76	92	918	0	68	2193	949	1534	42422	50	5366	884	244	4541	351192	0	247	1238	716	181	23	0	118	813	172	3218	70	57	72	135	510	67	1113	505	1981	1285	2840	52650	18539	0.138
19.9	370.86	7.58	1	0.010269	-0.010571	0.009935	0.07673	91845	1.85	171	963	0	66	2317	941	1561	44305	87	5349	933	225	4635	358831	158	207	1313	748	108	0	63	147	833	64	3129	107	28	79	221	714	7	1337	730	2048	1337	2462	51918	18308	0.139
20	371.86	7.58	1	0.010269	-0.010571	0.009935	0.07673	92534	1.83	151	976	0	46	2411	989	1551	43466	0	5563	937	281	4745	365259	61	197	1240	768	50	0	26	66	740	85	3034	0	0	19	234	580	0	1351	655	2172	1355	2271	51545	18865	0.139
20.1	372.86	7.58	1	0.010269	-0.010571	0.009935	0.07673	91532	1.72	97	989	0	72	2444	988	1571	42761	82	5532	943	257	4719	358645	0	251	1168	669	149	0	40	90	632	152	2955	0	0	31	129	511	0	1462	433	2102	1412	2833	51464	18451	0.139
20.2	373.86	7.58	1	0.010269	-0.010571	0.009935	0.07673	92966	1.9	135	1021	0	33	2308	1008	1558	45093	70	5363	957	241	5539	367457	0	212	1299	760	134	0	46	72	736	151	3014	17	0	99	156	637	0	1619	388	2085	1338	3142	51297	18493	0.139
20.3	374.86	7.59	1	0.010269	-0.010571	0.009935	0.07673	92612	1.9	143	923	0	72	2250	989	1507	44327	0	5438	929	190	4615	361578	0	310	1270	709	23	93	0	55	782	371	3023	0	65	33	324	558	129	1216	424	2224	1330	2759	53128	18815	0.139
20.4	375.86	7.59	1	0.010269	-0.010571	0.009935	0.07673	96601	1.83	144	1071	0	75	2423	945	1600	45441	76	5753	1009	330	4912	381705	0	307	1334	727	122	86	0	97	821	392	3218	0	50	42	315	587	58	1498	195	2210	1509	3238	53045	19167	0.142
20.5	376.86	7.6	1	0.010269	-0.010571	0.009935	0.07673	89515	1.75	118	1034	0	67	2144	1013	1521	41722	123	5276	901	209	4698	351830	0	260	1213	611	223	0	67	52	828	154	2987	0	0	72	177	672	44	1393	557	2260	1461	2375	50445	18086	0.137
20.6	377.86	7.6	1	0.010269	-0.010571	0.009935	0.07673	83192	1.68	100	878	0	16	2056	945	1260	39749	0	4759	871	261	4124	323093	18	226	1139	593	56	0	15	66	667	117	2819	22	14	65	237	558	32	967	422	1782	1176	2354	48089	17251	0.133
20.7	378.86	7.6	1	0.010269	-0.010571	0.009935	0.07673	92816	1.81	156	1022	0	38	2286	955	1512	43116	60	5699	916	262	4914	367926	0	296	1217	761	65	0	0	120	647	113	2899	41	24	34	337	644	8	1355	481	2253	1301	2723	51967	18667	0.139
20.8	379.86	7.61	1	0.010269	-0.010571	0.009935	0.07673	92601	1.75	103	1052	0	60	2142	932	1556	43398	44	5536	1004	339	4888	363037	0	228	1266	702	111	97	16	0	708	337	2984	0	116	24	170	565	17	1206	153	2095	1363	2773	51816	19257	0.139
20.9	380.86	7.61	1	0.010269	-0.010571	0.009935	0.07673	91911	1.69	93	983	0	89	2113	985	1464	44254	0	5408	917	296	4776	360858	238	303	1253	723	233	102	36	80	754	0	2897	62	121	24	231	608	51	1228	765	2053	1404	2037	50164	18432	0.139
21	381.86	7.63	1	0.010269	-0.010571	0.009935	0.07673	94884	1.92	156	1062	0	51	2318	1028	1727	46034	38	5485	986	275	4931	373641	0	264	1305	854	122	0	47	66	686	331	3197	53	65	100	242	644	0	1459	317	2161	1269	2891	52255	19117	0.141
21.1	382.86	7.62	1	0.010269	-0.010571	0.009935	0.07673	93290	1.83	99	1076	0	57	2208	911	1582	43966	0	5560	969	206	4963	369248	129	319	1297	841	134	26	0	16	823	124	2978	0	189	64	218	668	161	1500	337	2201	1555	2215	51350	18571	0.139
21.2	383.86	7.63	1	0.010269	-0.010571	0.009935	0.07673	94479	1.88	159	1000	0	39	2326	958	1623	45334	12	5594	930	272	4871	373132	0	246	1210	702	107	0	0	112	667	113	3086	32	66	66	267	623	142	1350	595	2242	1483	3264	51537	18919	0.14
21.3	384.86	7.63	1	0.010269	-0.010571	0.009935	0.07673	92716	1.79	111	984	0	35	2308	977	1538	44261	87	5510	959	191	4766	363735	0	188	1276	755	205	0	54	0	649	282	2976	48	58	64	163	600	0	1462	108	2303	1388	2457	51453	18738	0.139
21.4	385.86	7.64	1	0.010269	-0.010571	0.009935	0.07673	92586	1.76	94	1021	0	49	2284	1004	1513	43506	41	5567	917	263	4581	364759	0	202	1152	862	47	0	0	129	735	184	2985	0	47	0	191	533	168	1199	415	2322	1266	2808	50685	18523	0.138
21.5	386.86	7.64	1	0.010269	-0.010571	0.009935	0.07673	92498	1.81	139	994	0	58	2303	917	1629	44454	76	5453	992	173	4680	365522	0	168	1220	802	51	0	0	95	686	337	2983	0	31	88	228	586	228	1316	301	2002	1362	3288	51673	18667	0.138
21.6	387.86	7.65	1	0.010269	-0.010571	0.009935	0.07673	90047	1.77	125	971	0	66	2189	936	1495	42565	74	5357	877	261	4578	357267	176	220	1250	718	76	50	0	0	672	378	2868	0	29	40	143	638	38	1362	236	2001	1326	2246	49684	18202	0.136
21.7	388.86	7.66	1	0.010269	-0.010571	0.009935	0.07673	92828	1.9	104	1064	0	33	2288	955	1574	44372	110	5531	1075	196	4791	368440	61	179	1214	737	83	14	86	66	665	24	2924	52	0	79	234	565	0	1532	536	2025	1441	2481	50463	18697	0.138
21.8	389.86	7.65	1	0.010269	-0.010571	0.009935	0.07673	93745	1.84	101	1009	0	41	2287	942	1528	44217	50	5496	957	245	4943	370440	147	252	1292	686	80	0	0	0	649	212	3291	0	78	70	171	687	232	1400	320	2095	1224	2403	51025	18383	0.14
21.9	390.86	7.66	1	0.010269	-0.010571	0.009935	0.07673	93815	1.8	121	1053	0	28	2196	1000	1600	45945	96	5713	1047	268	4926	370514	0	246	1340	748	134	0	27	57	601	94	3019	24	49	0	136	679	0	1509	405	2241	1288	3426	51001	18420	0.139
22	391.86	7.67	1	0.010269	-0.010571	0.009935	0.07673	89205	1.72	113	971	0	72	2084	916	1532	42136	70	5272	888	184	4579	350958	0	214	1194	614	64	0	0	50	743	150	2937	49	0	0	218	557	127	1074	526	1982	1339	3296	49539	18267	0.137
22.1	392.86	7.67	1	0.010269	-0.010571	0.009935	0.07673	92828	1.72	96	976	0	30	2151	955	1582	43196	32	5528	957	292	4642	364722	0	235	1311	714	205	0	0	64	787	148	3007	0	69	46	116	648	72	1353	603	2128	1477	3141	51231	18826	0.14
22.2	393.86	7.68	1	0.010269	-0.010571	0.009935	0.07673	94652	1.73	130	1114	0	88	2252	968	1575	45486	79	5595	992	272	4871	372452	92	248	1316	818	202	27	0	135	705	302	3259	0	0	57	133	701	139	1469	255	2227	1331	2324	52457	18975	0.141
22.3	394.86	7.68	1	0.010269	-0.010571	0.009935	0.07673	93187	1.83	109	1034	0	82	2199	959	1627	44148	64	5475	1000	250	4725	367045	0	287	1238	695	110	0	0	60	692	357	3225	0	226	79	130	545	0	1463	0	2102	1408	2539	51693	18622	0.139
22.4	395.86	7.68	1	0.010269	-0.010571	0.009935	0.07673	88512	1.73	93	1005	0	54	2199	986	1521	43057	17	5039	930	172	4438	341664	0	226	1239	710	41	52	0	104	765	0	2902	74	0	82	207	522	55	1107	778	2038	1351	2683	51549	18411	0.137
22.5	396.86	7.67	1	0.010269	-0.010571	0.009935	0.07673	96387	1.81	124	1181	0	34	2413	844	1626	46646	20	5942	1006	229	5292	379589	0	264	1208	764	109	0	0	170	862	150	3072	58	152	61	310	616	0	1498	463	2309	1365	2707	53515	19229	0.141
22.6	397.86	7.67	1	0.010269	-0.010571	0.009935	0.07673	104808	1.98	133	1174	0	85	2622	945	1921	51578	0	6338	1088	229	5645	416678	0	301	1556	876	175	0	95	112	722	189	3217	0	130	89	152	759	41	1641	531	2613	1580	2748	54227	19596	0.147
22.7	398.86	7.7	1	0.010269	-0.010571	0.009935	0.07673	79747	1.58	65	819	0	38	1843	1056	1334	35826	26	4635	772	229	4099	304960	184	172	1131	645	88	0	0	0	543	175	2684	0	25	0	136	559	9	1036	140	1718	1127	2227	48759	17302	0.133
22.8	399.86	7.68	1	0.010269	-0.010571	0.009935	0.07673	94905	1.76	125	1090	0	44	2349	941	1658	45267	78	5790	829	306	4876	375547	0	257	1269	828	116	0	22	0	784	152	3062	0	0	54	200	502	0	1486	471	1977	1504	3046	52290	18800	0.14
22.9	400.86	7.69	1	0.010269	-0.010571	0.009935	0.07673	93113	1.88	104	945	0	31	2396	846	1531	44366	72	5610	899	313	4802	366535	0	264	1240	743	112	91	96	157	904	27	2938	22	162	92	270	631	0	1391	498	2036	1497	2693	51548	18974	0.139
23	401.86	7.7	1	0.010269	-0.010571	0.009935	0.07673	93411	1.9	103	1001	0	41	2366	910	1583	44496	0	5624	1009	236	4861	368015	0	216	1216	728	39	0	8	26	716	194	2965	70	31	19	170	581	5	1285	269	2229	1410	3044	51436	18663	0.14
23.1	402.86	7.71	1	0.010269	-0.010571	0.009935	0.07673	99831	1.91	111	1121	0	67	2424	943	1666	46406	45	6069	1008	211	4878	387946	195	270	1383	842	100	42	0	0	777	323	3355	185	193	67	187	617	83	1459	659	2359	1533	2284	57387	20639	0.147
23.2	403.86	7.72	1	0.010269	-0.010571	0.009935	0.07673	98055	1.96	109	1176	0	33	2385	1077	1840	49099	0	6395	1032	237	5153	395747	0	238	1379	797	82	0	0	88	618	238	3164	30	31	0	226	580	27	1627	557	2306	1517	2703	51057	18133	0.142
23.3	404.86	7.7	1	0.010269	-0.010571	0.009935	0.07673	75116	1.49	104	742	0	37	1631	1010	1206	33316	41	4192	722	222	3640	287494	0	208	936	574	73	0	0	128	529	441	2805	102	89	23	152	452	0	731	50	1529	1077	2170	46283	16756	0.129
23.4	405.86	7.7	1	0.010269	-0.010571	0.009935	0.07673	88518	1.78	137	929	0	25	1916	878	1529	42698	59	5180	912	288	4471	348802	147	210	1261	770	122	80	0	77	668	39	2946	24	5	93	182	511	0	1332	548	2012	1380	2265	49743	18302	0.136
23.5	406.86	7.72	1	0.010269	-0.010571	0.009935	0.07673	96324	1.93	80	1181	0	66	2265	964	1631	47925	20	5926	983	227	7403	381888	0	233	1416	792	199	29	0	72	626	192	3097	0	153	45	133	623	67	1284	251	2431	1391	2915	50352	18877	0.141
23.6	407.86	7.73	1	0.010269	-0.010571	0.009935	0.07673	92607	1.82	165	1060	0	60	2148	1002	1604	44669	165	5597	1063	314	4900	368429	146	310	1270	802	98	0	90	272	732	115	3084	0	0	71	293	643	6	1591	421	2323	1297	2064	49993	18597	0.138
23.7	408.86	7.73	1	0.010269	-0.010571	0.009935	0.07673	92647	1.88	98	1009	0	31	2263	1000	1640	44305	40	5565	938	284	4705	365873	0	232	1283	715	127	0	16	0	800	234	3003	15	158	30	207	693	15	1455	579	2020	1331	2888	51382	18372	0.139
23.8	409.86	7.73	1	0.010269	-0.010571	0.009935	0.07673	94870	1.88	140	1085	0	111	2285	979	1556	46150	0	5773	949	282	5098	377167	0	282	1280	776	112	35	0	0	763	106	3064	0	359	69	260	481	188	1526	413	2393	1480	2813	50509	18533	0.14
23.9	410.86	7.73	1	0.010269	-0.010571	0.009935	0.07673	95465	1.87	121	1077	0	80	2297	929	1617	46920	22	5834	942	238	4906	378718	42	246	1261	713	37	19	0	30	722	144	3168	17	89	112	140	588	73	1533	331	2220	1469	2649	51948	19278	0.14
24	411.86	7.74	1	0.010269	-0.010571	0.009935	0.07673	93156	1.83	100	1111	6	81	2143	970	1680	44993	9	5734	898	219	4758	371130	0	209	1228	738	78	68	6	232	789	22	3212	309	151	24	287	588	144	1251	664	2115	1365	2646	51328	18431	0.138
24.1	412.86	7.74	1	0.010269	-0.010571	0.009935	0.07673	96686	1.8	155	1162	0	41	2221	959	1669	46236	48	6123	859	259	4903	382411	0	223	1403	871	235	0	0	66	649	11	3089	105	72	29	97	557	0	1486	576	2224	1383	2909	53532	18995	0.141
24.2	413.86	7.75	1	0.010269	-0.010571	0.009935	0.07673	102312	2.05	183	1119	0	44	2493	974	1810	50741	90	6652	1017	296	5408	414753	0	253	1469	847	246	50	0	151	743	346	3211	0	19	14	206	631	242	1575	392	2452	1572	2603	52830	19408	0.144
24.3	414.86	7.74	1	0.010269	-0.010571	0.009935	0.07673	78355	1.7	112	885	0	25	1600	959	1291	36379	0	4510	874	212	3845	300638	31	247	994	586	102	0	0	0	582	412	2798	0	33	13	221	547	52	920	0	1832	1055	2079	46852	17316	0.132
24.4	415.86	7.74	1	0.010269	-0.010571	0.009935	0.07673	97623	1.85	168	1126	0	55	2287	885	1635	47952	31	5903	982	310	5096	388890	352	354	1512	873	214	14	105	123	880	105	3249	0	66	78	238	689	24	1369	504	2217	1500	2288	51529	18882	0.142
24.5	416.86	7.75	1	0.010269	-0.010571	0.009935	0.07673	94000	1.77	128	972	0	60	2228	933	1580	45222	92	5804	937	290	4805	371851	0	173	1175	679	151	0	0	97	675	221	3101	0	75	37	115	618	168	1251	224	2320	1416	2661	51008	19285	0.14
24.6	417.86	7.75	1	0.010269	-0.010571	0.009935	0.07673	98728	1.78	137	1092	0	50	2358	943	1586	47613	50	6057	984	280	5029	392588	0	361	1388	820	169	59	0	64	784	215	3155	0	186	39	239	629	98	1399	680	2709	1366	2638	52926	19264	0.143
24.7	418.86	7.76	1	0.010269	-0.010571	0.009935	0.07673	90244	1.94	106	1036	0	29	2146	948	1590	42110	13	5360	822	242	4627	354980	0	240	1292	687	123	14	0	226	671	269	2982	0	114	101	189	493	0	1287	209	2193	1217	2419	50493	18337	0.137
24.8	419.86	7.76	1	0.010269	-0.010571	0.009935	0.07673	94550	1.89	126	1089	0	67	2228	917	1713	46553	19	5551	1065	187	5022	375294	0	211	1218	732	193	0	0	136	760	42	2942	46	161	44	93	676	0	1472	488	2216	1390	2824	51849	18832	0.139
24.9	420.86	7.75	1	0.010269	-0.010571	0.009935	0.07673	93235	1.95	107	1020	0	34	2176	901	1654	44201	38	5587	938	254	4780	369093	0	195	1285	735	166	0	0	84	653	176	3107	85	152	38	180	583	202	1393	521	2210	1444	2534	51219	18701	0.139
25	421.86	7.76	1	0.010269	-0.010571	0.009935	0.07673	95893	1.94	138	1031	15	75	2402	964	1667	46311	91	5870	1042	250	4952	381420	80	224	1312	740	164	0	0	190	812	301	3166	0	0	52	244	623	39	1412	249	2081	1361	2711	52814	19203	0.14
25.1	422.86	7.77	1	0.010269	-0.010571	0.009935	0.07673	96582	1.93	118	1114	9	81	2334	959	1662	46945	16	5884	1020	218	4987	383610	118	250	1386	763	213	24	20	0	796	303	3074	0	55	127	187	571	0	1269	423	2175	1437	2563	51902	19217	0.141
25.2	423.86	7.77	1	0.010269	-0.010571	0.009935	0.07673	92397	1.74	170	1008	0	70	2155	926	1519	44027	0	5394	882	243	4900	363708	27	235	1307	772	185	0	39	35	758	287	3128	36	170	62	214	636	95	1278	130	2135	1364	2649	50889	18577	0.139
25.3	424.86	7.78	1	0.010269	-0.010571	0.009935	0.07673	96594	1.84	150	1087	0	90	2364	942	1708	46595	35	5743	1024	271	5098	382526	307	238	1347	906	87	69	0	108	848	136	3238	0	0	65	298	588	26	1394	444	2190	1491	2144	53088	19229	0.141
25.4	425.86	7.77	1	0.010269	-0.010571	0.009935	0.07673	91974	1.82	137	1038	0	41	2163	912	1675	44875	0	5539	910	242	4757	363062	0	236	1254	792	109	0	84	136	667	164	3042	58	99	107	102	615	39	1477	510	2116	1350	2693	51308	18563	0.138
25.5	426.86	7.76	1	0.010269	-0.010571	0.009935	0.07673	96212	1.83	83	1134	0	31	2329	878	1779	45170	138	5747	965	222	5016	382669	0	236	1236	830	65	0	20	131	644	263	2877	0	239	43	178	549	0	1516	294	2328	1474	2652	52032	18943	0.142
25.6	427.86	7.78	1	0.010269	-0.010571	0.009935	0.07673	93955	1.82	151	1044	0	46	2377	965	1616	45753	68	5660	917	351	4994	374649	0	294	1105	780	67	30	0	10	679	215	2816	0	96	73	337	599	25	1474	525	2224	1454	2607	50631	18635	0.139
25.7	428.86	7.78	1	0.010269	-0.010571	0.009935	0.07673	95187	1.94	173	1119	0	42	2273	917	1637	44737	46	5667	920	247	4880	376760	0	180	1285	817	0	0	134	150	847	161	3238	105	0	90	229	572	0	1581	321	2305	1382	2768	52980	19064	0.141
25.8	429.86	7.78	1	0.010269	-0.010571	0.009935	0.07673	96489	1.93	129	1047	0	57	2326	953	1642	46409	0	6003	901	323	4938	382128	107	298	1377	751	74	96	31	123	817	240	3170	0	274	26	213	565	0	1471	314	2027	1468	2610	51895	18538	0.142
25.9	430.86	7.79	1	0.010269	-0.010571	0.009935	0.07673	95934	1.87	78	1035	0	35	2314	907	1638	46402	0	5936	965	258	4830	380238	0	220	1301	863	160	0	0	73	783	166	3124	46	190	45	163	661	61	1494	450	2234	1429	2665	52204	19009	0.141
26	431.86	7.79	1	0.010269	-0.010571	0.009935	0.07673	96045	1.84	127	1109	0	54	2341	915	1648	47229	0	5872	986	270	4938	383376	0	294	1345	701	99	0	0	83	746	139	3228	34	171	107	163	502	94	1493	293	2254	1332	3133	50876	18666	0.14
26.1	432.86	7.79	1	0.010269	-0.010571	0.009935	0.07673	96688	1.81	136	981	0	62	2370	890	1626	46814	9	5955	1003	275	5017	384758	0	208	1272	790	124	0	0	0	718	96	3024	91	6	62	153	636	182	1331	333	2305	1479	3132	51637	18920	0.141
26.2	433.86	7.8	1	0.010269	-0.010571	0.009935	0.07673	97029	1.93	131	1147	0	59	2276	977	1689	47238	36	5744	1103	238	4903	386559	0	201	1330	781	182	0	0	21	860	165	3050	0	0	104	16	649	131	1453	464	2460	1343	3222	52297	18742	0.141
26.3	434.86	7.8	1	0.010269	-0.010571	0.009935	0.07673	95818	1.72	134	1007	0	85	2451	983	1632	45488	74	5795	981	212	4987	379758	0	256	1319	785	190	0	0	35	767	160	3188	0	62	68	85	716	101	1405	606	2366	1419	2858	51449	18428	0.141
26.4	435.86	7.8	1	0.010269	-0.010571	0.009935	0.07673	95944	1.79	92	1023	0	42	2403	965	1735	47113	62	5751	945	276	4984	381469	0	238	1307	786	119	18	152	131	695	254	3131	0	154	95	309	718	0	1384	142	2444	1389	2579	51115	18709	0.14
26.5	436.86	7.81	1	0.010269	-0.010571	0.009935	0.07673	96750	1.78	117	991	0	80	2356	997	1559	46352	77	5835	1038	194	5008	384112	209	246	1270	817	136	29	0	47	617	365	3176	0	93	65	230	642	143	1320	263	2321	1400	2208	51826	19277	0.141
26.6	437.86	7.81	1	0.010269	-0.010571	0.009935	0.07673	95687	1.81	85	1036	0	37	2394	984	1682	46711	75	5690	947	339	4900	380232	0	238	1262	707	121	15	48	186	649	156	3172	0	114	62	235	642	86	1315	467	2587	1407	2553	51164	18987	0.14
26.7	438.86	7.81	1	0.010269	-0.010571	0.009935	0.07673	95460	1.91	77	1053	0	33	2269	963	1539	45490	19	5894	895	260	4937	379490	226	298	1309	714	82	95	0	123	790	161	3185	161	167	19	205	717	56	1327	484	1960	1455	2429	51610	19145	0.14
26.8	439.86	7.81	1	0.010269	-0.010571	0.009935	0.07673	96577	1.88	153	1178	0	77	2301	965	1668	46652	14	5845	1013	319	5148	385264	0	246	1266	826	144	0	90	0	659	215	2980	23	0	58	153	598	0	1546	159	2189	1402	2823	52148	19064	0.141
26.9	440.86	7.81	1	0.010269	-0.010571	0.009935	0.07673	97141	1.85	132	1058	0	61	2514	973	1583	46457	89	5911	1013	278	5065	387095	111	229	1257	835	87	69	72	71	737	335	3092	0	64	65	265	679	0	1356	445	2324	1351	2437	52015	19236	0.141
27	441.86	7.81	1	0.010269	-0.010571	0.009935	0.07673	95913	1.9	150	979	0	46	2620	918	1697	45601	34	5893	1074	291	4968	381844	0	291	1295	690	156	0	0	131	664	177	3007	95	146	63	284	645	138	1343	359	2214	1454	3145	50916	18824	0.14
27.1	442.86	7.82	1	0.010269	-0.010571	0.009935	0.07673	97047	1.89	177	893	0	69	2730	1045	1734	44929	0	5763	1007	310	5360	385957	0	225	1251	821	118	42	0	107	763	262	3097	105	277	58	219	601	161	1512	276	2394	1552	2869	51385	18719	0.142
27.2	443.86	7.82	1	0.010269	-0.010571	0.009935	0.07673	95633	1.8	160	913	0	62	2688	918	1572	44744	55	5741	1047	331	5084	381354	0	210	1235	836	67	74	13	80	636	357	3046	0	62	0	285	574	40	1540	376	2398	1485	2905	51728	19004	0.14
27.3	444.86	7.82	1	0.010269	-0.010571	0.009935	0.07673	94476	1.75	146	905	0	51	2778	896	1487	44568	9	5515	980	259	4850	373340	285	206	1340	807	124	0	0	98	713	89	3224	9	61	68	178	740	116	1376	439	2227	1430	2353	51461	18799	0.14
27.4	445.86	7.82	1	0.010269	-0.010571	0.009935	0.07673	97024	1.9	96	839	0	44	2934	986	1601	44966	121	5763	946	295	5079	388069	306	234	1225	786	133	18	0	143	792	0	3206	61	0	79	276	637	36	1411	769	1964	1534	2474	51490	18999	0.141
27.5	446.86	7.82	1	0.010269	-0.010571	0.009935	0.07673	97905	1.86	99	894	0	83	2847	973	1673	45217	161	5748	1053	227	5157	392876	0	250	1286	780	60	0	80	111	642	186	3058	27	135	29	216	677	111	1689	546	2496	1460	3393	51786	19217	0.141
27.6	447.86	7.83	1	0.010269	-0.010571	0.009935	0.07673	96794	1.83	122	790	0	72	2940	978	1570	43225	11	5677	878	305	4968	385776	0	254	1241	763	165	0	0	48	571	339	3124	36	99	45	265	644	107	1555	247	2387	1430	2694	51291	18719	0.141
27.7	448.86	7.83	1	0.010269	-0.010571	0.009935	0.07673	97130	1.73	40	872	0	79	2960	952	1588	43751	12	5775	942	276	5214	386429	0	241	1275	671	123	57	0	42	703	286	3157	85	0	59	176	620	196	1419	320	2405	1399	2790	52457	18666	0.142
27.8	449.86	7.83	1	0.010269	-0.010571	0.009935	0.07673	95923	1.82	100	945	0	66	2746	935	1597	43977	0	5617	884	296	4889	380234	143	256	1396	765	139	17	76	108	690	172	3111	0	182	18	206	600	0	1441	512	1873	1591	2671	51830	19155	0.141
27.9	450.86	7.83	1	0.010269	-0.010571	0.009935	0.07673	99526	2.01	121	1103	0	64	2657	984	1614	48047	82	6005	1085	302	5216	398224	116	237	1240	683	188	22	11	82	740	366	3196	0	150	13	243	567	110	1458	218	2100	1464	2554	52375	18924	0.143
28	451.86	7.83	1	0.010269	-0.010571	0.009935	0.07673	95828	1.98	165	951	0	62	2488	1003	1522	44881	45	5753	1015	290	5018	382316	91	287	1311	824	115	0	0	79	762	180	3191	0	32	33	220	670	0	1594	467	2286	1444	2028	51176	18986	0.141
28.1	452.86	7.83	1	0.010269	-0.010571	0.009935	0.07673	101192	2.03	173	1111	0	41	2670	1048	1805	50424	74	6322	1016	230	5356	409575	197	187	1222	817	99	0	0	91	772	391	3326	0	46	118	294	623	186	1500	242	2443	1494	2227	51405	19123	0.143
28.2	453.86	7.84	1	0.010269	-0.010571	0.009935	0.07673	88330	1.84	87	865	0	62	2196	1021	1491	43359	48	5139	959	267	5419	350491	0	158	1209	714	144	0	0	46	593	244	3080	109	0	57	157	673	82	1223	262	2036	1291	2646	48713	17909	0.135
28.3	454.86	7.83	1	0.010269	-0.010571	0.009935	0.07673	94421	1.81	49	852	0	68	2767	914	1551	42271	0	5927	966	285	4756	373914	0	233	1176	801	82	0	49	77	662	205	3180	0	224	24	261	616	0	1377	435	2068	1273	3379	51540	19091	0.14
28.4	455.86	7.84	1	0.010269	-0.010571	0.009935	0.07673	98589	2.05	125	914	0	76	2851	973	1602	45557	86	5750	1006	314	5086	394478	118	245	1387	866	159	80	17	19	824	311	3226	130	28	120	191	547	0	1557	233	2295	1481	2676	52514	18987	0.143
28.5	456.86	7.84	1	0.010269	-0.010571	0.009935	0.07673	96363	1.98	140	918	0	70	2523	960	1643	44690	129	5879	1020	259	5965	387309	0	181	1215	734	57	52	84	72	620	135	2993	0	0	0	266	576	0	1687	519	2377	1414	2541	50800	18785	0.14
28.6	457.86	7.84	1	0.010269	-0.010571	0.009935	0.07673	95349	1.89	152	803	0	75	3070	953	1647	41329	64	5667	950	306	4964	377534	0	308	1388	669	260	0	24	85	644	244	3162	28	105	57	179	677	49	1298	309	2014	1487	3436	51217	18699	0.141
28.7	458.86	7.84	1	0.010269	-0.010571	0.009935	0.07673	98018	1.93	108	817	0	120	3077	952	1579	44787	91	5696	1072	365	5081	389953	0	265	1342	840	238	0	121	0	743	341	3242	0	131	113	134	692	0	1410	168	2471	1446	2876	52031	18964	0.142
28.8	459.86	7.84	1	0.010269	-0.010571	0.009935	0.07673	94853	1.77	137	712	0	56	3104	954	1540	41141	101	5548	1009	320	4686	373543	0	141	1316	724	137	27	106	100	769	309	3268	0	32	0	235	593	31	1561	427	2176	1275	3163	51078	18771	0.14
28.9	460.86	7.84	1	0.010269	-0.010571	0.009935	0.07673	95715	1.76	86	722	0	64	3169	966	1466	41616	136	5484	1002	293	4911	379111	291	266	1278	818	121	0	125	191	634	233	3194	34	66	17	137	709	70	1485	382	2208	1507	2421	51800	18818	0.141
29	461.86	7.85	1	0.010269	-0.010571	0.009935	0.07673	96594	1.94	38	669	0	58	3356	942	1534	41725	133	5519	1051	293	4919	381533	14	224	1223	831	170	27	0	0	684	160	3150	0	73	34	170	622	190	1317	448	2158	1444	3031	51852	18800	0.141
29.1	462.86	7.85	1	0.010269	-0.010571	0.009935	0.07673	96933	1.83	142	750	0	73	3209	963	1463	43049	24	5624	930	221	5159	381579	0	265	1269	830	169	0	0	61	749	49	3323	0	24	0	227	704	118	1506	725	2238	1473	3109	53170	19242	0.142
29.2	463.86	7.85	1	0.010269	-0.010571	0.009935	0.07673	95050	1.8	105	834	22	80	3169	969	1513	43151	42	5510	878	269	4854	373761	0	195	1333	832	218	48	101	64	693	16	3223	31	0	53	174	600	0	1396	495	2047	1384	4025	51544	19119	0.14
29.3	464.86	7.85	1	0.010269	-0.010571	0.009935	0.07673	96726	1.84	81	774	0	30	3346	1004	1565	43706	48	5695	919	274	4920	381933	0	294	1350	835	297	0	27	153	736	116	3256	4	0	44	169	728	11	1488	566	2235	1491	2924	52129	18914	0.141
29.4	465.86	7.86	1	0.010269	-0.010571	0.009935	0.07673	95196	1.82	120	783	0	65	3046	1010	1473	41893	104	5745	934	296	4861	377108	0	217	1348	752	144	0	0	66	757	244	3071	0	226	28	177	639	135	1382	319	2215	1321	3484	50947	18317	0.14
29.5	466.86	7.86	1	0.010269	-0.010571	0.009935	0.07673	96812	1.76	132	734	0	59	3195	999	1509	43634	56	5728	1050	248	5064	383532	0	285	1402	829	87	81	31	108	768	433	3291	0	253	39	282	696	0	1497	202	2219	1498	2998	50259	19127	0.141
29.6	467.86	7.86	1	0.010269	-0.010571	0.009935	0.07673	96301	1.71	84	816	0	50	2936	888	1627	44659	54	5547	993	324	4975	382542	44	233	1194	774	81	166	0	57	778	213	3178	0	86	86	326	534	115	1431	342	2074	1530	2837	51720	18866	0.14
29.7	468.86	7.87	1	0.010269	-0.010571	0.009935	0.07673	95730	1.84	105	816	0	43	2890	977	1491	43805	27	5494	1067	253	4944	380419	0	200	1221	846	153	18	71	35	861	139	3168	19	47	62	195	587	0	1531	398	2261	1374	2836	51511	18535	0.141
29.8	469.86	7.86	1	0.010269	-0.010571	0.009935	0.07673	96562	1.86	136	763	0	82	3120	902	1519	44439	56	5548	983	381	5057	381770	0	322	1331	914	176	29	45	77	725	99	3133	0	112	98	178	791	35	1621	574	2343	1440	3278	52074	19279	0.141
29.9	470.86	7.87	1	0.010269	-0.010571	0.009935	0.07673	96063	1.82	123	855	0	64	3000	912	1539	43769	32	5490	999	312	4850	379201	0	254	1250	652	228	0	130	8	645	83	3053	0	0	43	168	820	45	1293	576	2018	1427	3094	52454	19448	0.141
30	471.86	7.87	1	0.010269	-0.010571	0.009935	0.07673	95623	1.81	58	748	0	74	3160	1023	1574	42837	29	5630	1005	271	4786	377323	0	253	1226	825	171	128	0	0	785	240	3029	0	0	52	243	635	17	1592	328	2062	1381	2917	51547	18753	0.141
30.1	472.86	7.87	1	0.010269	-0.010571	0.009935	0.07673	96746	1.78	84	805	0	62	3071	971	1538	43657	106	5548	959	253	4913	384906	16	289	1311	755	207	37	26	51	846	162	3065	0	160	41	250	729	100	1536	349	2213	1494	2918	52079	19120	0.141
30.2	473.86	7.87	1	0.010269	-0.010571	0.009935	0.07673	97791	1.77	156	905	0	76	2933	1001	1633	45358	0	5770	1047	245	5267	389781	0	301	1467	763	114	0	24	136	686	348	3252	0	230	48	166	614	15	1445	195	2216	1494	2873	51574	19005	0.142
30.3	474.86	7.87	1	0.010269	-0.010571	0.009935	0.07673	94784	1.84	105	800	0	78	2847	1011	1453	42464	21	5564	920	285	4878	374817	0	190	1139	696	168	0	0	148	783	309	3101	0	0	34	177	677	21	1527	289	2411	1318	2876	51339	18781	0.14
30.4	475.86	7.86	1	0.010269	-0.010571	0.009935	0.07673	97779	1.95	101	903	0	66	2988	928	1544	45003	72	5795	1039	300	5017	389272	0	299	1410	883	81	121	25	26	765	127	3135	0	62	77	238	621	11	1288	411	2143	1367	2985	51702	19234	0.142
30.5	476.86	7.88	1	0.010269	-0.010571	0.009935	0.07673	96517	1.94	106	911	0	77	2663	1007	1649	45599	35	5832	965	320	4933	383132	0	206	1187	814	133	101	0	68	823	80	3032	16	21	0	234	525	64	1489	448	2081	1258	3173	51646	18749	0.141
30.6	477.86	7.87	1	0.010269	-0.010571	0.009935	0.07673	97782	1.99	128	948	0	64	2643	956	1720	46841	0	5913	971	316	5005	390085	0	246	1297	750	150	87	36	105	600	327	3138	0	29	22	176	653	100	1355	314	2448	1453	3235	52320	18919	0.142
30.7	478.86	7.88	1	0.010269	-0.010571	0.009935	0.07673	95936	1.87	157	930	0	65	2548	945	1592	45117	102	5688	1046	323	4896	380919	0	268	1312	829	108	32	39	166	790	131	3369	0	156	63	265	669	46	1450	324	2348	1481	3286	51302	18567	0.141
30.8	479.86	7.87	1	0.010269	-0.010571	0.009935	0.07673	96517	1.86	134	1058	0	40	2395	979	1598	46375	120	5807	1053	256	4952	385692	0	247	1370	790	196	45	8	100	721	9	3162	37	42	91	222	589	0	1461	487	2334	1461	2712	51025	18670	0.141
30.9	480.86	7.88	1	0.010269	-0.010571	0.009935	0.07673	96110	1.95	137	1063	0	53	2423	959	1733	46232	0	5792	987	296	4994	381874	37	335	1365	796	147	62	0	67	681	319	3099	35	6	122	282	705	81	1494	171	2151	1516	2779	52123	18813	0.141
31	481.86	7.88	1	0.010269	-0.010571	0.009935	0.07673	95939	1.87	129	1037	0	83	2499	1045	1667	46692	40	5778	1015	218	5024	381132	0	184	1239	855	88	70	0	106	712	144	3017	0	57	58	247	590	82	1490	575	2495	1431	2825	51130	18963	0.141
31.1	482.86	7.88	1	0.010269	-0.010571	0.009935	0.07673	97024	1.95	90	1012	0	91	2544	1027	1637	46402	24	5881	885	338	4938	385086	0	205	1391	813	65	46	0	13	786	33	3158	42	9	42	186	696	0	1441	514	2052	1407	3307	52217	19117	0.141
31.2	483.86	7.88	1	0.010269	-0.010571	0.009935	0.07673	95566	1.89	134	1023	0	66	2364	947	1660	45583	100	5635	957	274	5254	379236	184	216	1734	734	153	9	41	120	700	147	3097	0	99	81	169	553	91	1429	549	1921	1446	2738	52268	18913	0.14
31.3	484.86	7.89	1	0.010269	-0.010571	0.009935	0.07673	98542	1.82	129	1099	0	76	2540	980	1772	47702	70	5900	1167	251	5119	393232	0	279	1263	856	101	20	0	56	704	242	2995	0	0	104	271	588	158	1529	317	2367	1536	2892	52502	19132	0.142
31.4	485.86	7.89	1	0.010269	-0.010571	0.009935	0.07673	91846	1.83	98	1031	0	62	2296	1002	1601	43703	25	5393	999	173	4771	363050	0	171	1271	652	73	0	0	0	612	0	3024	27	125	94	203	608	117	1426	594	2140	1441	3366	51087	18543	0.138
31.5	486.86	7.89	1	0.010269	-0.010571	0.009935	0.07673	97271	1.87	127	1086	0	49	2455	1001	1724	47924	27	5887	1050	342	5134	389296	275	215	1292	722	142	20	94	25	734	145	3199	0	156	83	228	725	0	1507	413	2429	1347	2138	51326	18639	0.141
31.6	487.86	7.88	1	0.010269	-0.010571	0.009935	0.07673	96824	1.81	119	1013	0	57	2534	1016	1669	46498	9	5844	964	317	4952	387525	0	271	1315	770	65	43	0	19	804	267	3150	0	245	64	168	551	154	1518	190	2637	1332	2210	51730	18862	0.141
31.7	488.86	7.89	1	0.010269	-0.010571	0.009935	0.07673	96576	1.91	120	942	0	82	2406	998	1574	46227	45	5781	1029	296	5087	385418	0	174	1340	920	119	0	0	169	908	229	3071	29	177	57	147	620	104	1473	263	2419	1445	2796	51952	19068	0.141
31.8	489.86	7.89	1	0.010269	-0.010571	0.009935	0.07673	94856	1.88	137	1068	0	84	2455	1100	1566	45308	0	5738	902	321	4972	375853	0	224	1208	725	156	0	0	120	616	0	3154	53	0	60	172	621	97	1348	638	2237	1354	3086	51828	19223	0.14
31.9	490.86	7.89	1	0.010269	-0.010571	0.009935	0.07673	97625	1.86	124	1062	0	42	2654	957	1628	46108	95	5721	989	231	5061	385417	0	242	1284	721	101	0	0	103	823	332	3337	99	58	48	245	627	97	1578	352	2197	1472	2987	53282	19578	0.142
32	491.86	7.89	1	0.010269	-0.010571	0.009935	0.07673	94486	1.86	88	976	0	71	2681	1060	1593	43674	39	5801	971	246	4935	374617	0	263	1260	743	157	53	0	31	694	139	3188	72	0	7	192	580	108	1395	452	2463	1405	3302	51516	18564	0.14
32.1	492.86	7.89	1	0.010269	-0.010571	0.009935	0.07673	96488	1.84	154	1089	0	86	2711	1004	1643	46624	17	5742	953	399	4964	382370	0	234	1191	752	25	0	0	10	568	313	3008	0	156	92	281	658	129	1610	265	2345	1383	3335	52119	19045	0.141
32.2	493.86	7.89	1	0.010269	-0.010571	0.009935	0.07673	93090	1.76	99	1011	0	70	2350	941	1605	44477	0	5727	916	253	4809	369334	0	339	1285	801	172	50	0	0	726	86	3162	0	0	30	259	630	131	1419	496	2164	1327	2810	50311	18271	0.139
32.3	494.86	7.89	1	0.010269	-0.010571	0.009935	0.07673	97250	1.96	98	970	0	71	2651	992	1722	46509	72	5727	1000	197	4949	385379	0	227	1340	858	108	101	9	60	607	223	3027	0	130	69	303	584	141	1398	374	2151	1382	2967	52308	19004	0.142
32.4	495.86	7.89	1	0.010269	-0.010571	0.009935	0.07673	98189	1.92	152	914	0	44	2575	984	1573	46727	0	5855	888	290	5183	390236	0	225	1328	861	114	61	127	98	649	106	3252	0	75	99	283	562	21	1266	437	2235	1533	3545	52384	18818	0.142
32.5	496.86	7.88	1	0.010269	-0.010571	0.009935	0.07673	96742	1.86	139	983	0	90	2782	1016	1680	45378	18	5951	954	241	5289	386609	0	158	1107	831	147	0	0	90	736	179	3012	0	68	9	189	554	206	1528	507	2516	1366	3177	51339	19050	0.141
32.6	497.86	7.88	1	0.010269	-0.010571	0.009935	0.07673	95088	1.77	99	866	0	60	2729	993	1455	44218	40	5565	967	285	4915	377565	0	251	1251	794	116	0	0	67	579	317	3155	32	70	45	287	585	76	1502	320	2129	1340	3399	51512	19029	0.14
32.7	498.86	7.89	1	0.010269	-0.010571	0.009935	0.07673	97768	1.79	111	982	0	81	2840	950	1626	45283	121	5799	999	243	4995	388556	0	228	1295	789	135	77	56	134	731	269	3305	110	141	59	285	519	8	1498	453	2488	1467	3404	52637	19448	0.142
32.8	499.86	7.89	1	0.010269	-0.010571	0.009935	0.07673	95266	1.81	90	931	0	79	2856	1048	1539	44361	0	5612	933	235	4935	378426	0	228	1205	773	107	0	0	81	758	90	3368	72	104	67	200	570	136	1359	433	2151	1458	3191	51458	18823	0.14
32.9	500.86	7.89	1	0.010269	-0.010571	0.009935	0.07673	96352	1.9	107	861	0	66	2959	1037	1619	44335	87	5563	1001	253	4959	383530	29	238	1257	815	198	67	49	82	686	179	3119	37	20	91	214	751	85	1316	553	2290	1399	2936	51743	19069	0.141
33	501.86	7.89	1	0.010269	-0.010571	0.009935	0.07673	96918	1.91	112	957	0	67	2825	983	1609	44882	27	5683	1033	346	4971	384010	0	207	1198	717	132	53	41	0	662	48	3033	121	285	38	69	626	49	1600	605	2189	1455	3778	52694	19256	0.141
33.1	502.86	7.9	1	0.010269	-0.010571	0.009935	0.07673	96273	1.76	114	992	0	67	2669	1024	1599	45796	87	5704	894	264	5046	380139	130	294	1306	857	182	74	0	0	684	322	3229	0	0	52	150	591	43	1491	193	2237	1425	2443	52288	19275	0.141
33.2	503.86	7.89	1	0.010269	-0.010571	0.009935	0.07673	96655	1.81	108	1052	0	46	2606	1055	1667	46542	14	5759	973	204	4904	383374	0	263	1256	797	116	78	0	104	695	133	3231	0	0	14	302	579	0	1350	450	2367	1514	2855	51407	19151	0.142
33.3	504.86	7.88	1	0.010269	-0.010571	0.009935	0.07673	97619	1.95	113	1002	0	67	2699	974	1631	45956	29	5829	915	332	4978	388345	0	284	1273	736	142	0	0	112	745	160	3433	0	102	49	227	661	0	1441	395	2308	1530	3705	51823	19248	0.142
33.4	505.86	7.88	1	0.010269	-0.010571	0.009935	0.07673	96061	1.77	112	945	0	73	2750	1060	1559	44134	63	5651	979	278	4936	380099	233	248	1448	891	164	56	92	114	753	107	3195	10	0	95	139	655	0	1331	626	2326	1363	2462	53046	19237	0.141
33.5	506.86	7.89	1	0.010269	-0.010571	0.009935	0.07673	95233	1.72	95	881	0	66	2814	1064	1576	43324	17	5569	907	267	4890	374682	0	223	1172	691	146	45	46	36	743	234	3208	74	215	64	183	655	132	1488	412	2117	1392	3281	52477	18952	0.141
33.6	507.86	7.88	1	0.010269	-0.010571	0.009935	0.07673	96328	1.88	111	893	0	47	2906	1013	1508	43404	79	5647	949	264	4912	379855	0	170	1302	774	167	0	179	47	639	201	3161	28	49	114	155	722	0	1525	376	2404	1481	2645	52036	19000	0.141
33.7	508.86	7.88	1	0.010269	-0.010571	0.009935	0.07673	97503	1.87	123	917	0	84	2894	989	1602	44229	23	5845	1026	301	5035	385593	235	243	1292	848	157	0	33	17	971	24	3287	0	132	50	270	724	0	1410	445	2450	1515	2113	52342	19301	0.142
33.8	509.86	7.88	1	0.010269	-0.010571	0.009935	0.07673	97989	1.82	125	922	0	50	2988	973	1609	45039	106	5867	955	268	5225	387177	0	261	1307	848	218	0	0	39	912	126	3131	0	73	101	138	726	156	1312	362	2303	1608	2885	53402	19174	0.142
33.9	510.86	7.88	1	0.010269	-0.010571	0.009935	0.07673	95653	1.89	126	971	0	37	2536	1074	1590	46233	9	5652	926	245	4988	377892	0	226	1360	854	119	0	0	75	705	198	3019	0	20	118	358	624	122	1419	640	2332	1488	2745	52115	18983	0.14
34	511.86	7.87	1	0.010269	-0.010571	0.009935	0.07673	100450	1.98	127	1114	6	93	2700	979	1785	48022	89	6121	965	288	5315	401675	0	172	1392	750	154	0	0	63	687	223	3212	0	43	65	161	711	0	1523	293	2577	1426	2979	52021	19183	0.143
34.1	512.86	7.88	1	0.010269	-0.010571	0.009935	0.07673	95166	1.86	108	946	0	29	2595	997	1599	44044	23	5563	931	220	4915	374113	0	210	1290	757	92	184	0	0	756	314	3402	48	151	40	180	593	184	1227	237	2436	1350	3030	51930	19030	0.141
34.2	513.86	7.87	1	0.010269	-0.010571	0.009935	0.07673	97994	1.84	134	900	0	67	3064	1056	1646	44912	28	5742	951	292	5776	383048	0	235	1302	737	125	115	0	136	655	196	3149	0	190	51	269	664	39	1416	446	2464	1498	3416	53572	19511	0.143
34.3	514.86	7.87	1	0.010269	-0.010571	0.009935	0.07673	98511	1.81	127	1001	0	108	2887	1013	1582	44486	119	5542	1156	271	5018	388388	96	238	1294	776	82	0	19	19	779	219	3105	0	5	47	169	658	35	1363	542	2158	1460	2440	53604	19388	0.144
34.4	515.86	7.87	1	0.010269	-0.010571	0.009935	0.07673	98690	1.91	113	1112	0	77	2646	1005	1728	46467	7	5785	956	229	5055	390120	0	312	1435	792	33	54	4	25	767	314	2996	0	143	59	369	594	0	1536	148	2417	1407	3230	53229	19126	0.143
34.5	516.86	7.86	1	0.010269	-0.010571	0.009935	0.07673	98457	1.93	134	1074	0	89	2514	898	1620	46974	96	6173	925	250	5235	389118	0	157	1373	825	28	0	0	118	778	162	3156	0	264	0	232	485	0	1605	528	2435	1305	3488	53533	19193	0.143
34.6	517.86	7.86	1	0.010269	-0.010571	0.009935	0.07673	98327	1.92	108	1026	0	39	2456	1015	1617	47510	0	5872	1042	221	7050	388232	111	302	1384	880	144	127	0	0	767	177	3208	49	0	16	181	608	164	1426	594	2044	1528	2577	54187	19121	0.143
34.7	518.86	7.86	1	0.010269	-0.010571	0.009935	0.07673	98433	1.91	142	1017	0	75	2625	1022	1710	46059	56	5907	1086	314	4948	390075	0	245	1310	870	44	24	29	0	703	257	3162	0	212	77	319	689	57	1624	489	2463	1420	2804	53407	19250	0.143
34.8	519.86	7.86	1	0.010269	-0.010571	0.009935	0.07673	97421	1.97	160	1090	0	67	2501	997	1682	47380	11	5792	985	303	5008	385927	0	290	1246	824	139	0	20	75	656	105	3074	0	146	70	237	694	154	1344	389	2252	1551	2758	51959	19226	0.142
34.9	520.86	7.85	1	0.010269	-0.010571	0.009935	0.07673	97714	1.85	131	1045	0	54	2469	967	1737	46435	68	5929	1003	275	5138	387453	45	206	1300	847	91	0	0	0	662	261	3173	0	0	49	67	632	41	1575	380	2055	1439	2811	52499	19174	0.142
35	521.86	7.85	1	0.010269	-0.010571	0.009935	0.07673	97647	1.88	141	1064	0	64	2479	1021	1730	47274	24	6014	948	315	5049	386715	0	227	1316	804	147	0	0	144	725	269	3185	131	70	74	212	679	0	1398	419	2373	1422	3505	53338	19102	0.142
35.1	522.86	7.86	1	0.010269	-0.010571	0.009935	0.07673	95729	1.81	170	969	0	58	2522	1006	1582	44523	11	5868	1035	220	4868	378701	271	275	1499	811	176	0	0	11	763	164	3222	59	37	19	107	735	169	1411	376	2045	1412	2711	51662	18830	0.141
35.2	523.86	7.85	1	0.010269	-0.010571	0.009935	0.07673	96908	1.79	107	981	0	96	2508	1050	1637	45666	48	5788	1074	220	4974	383169	115	249	1383	844	119	0	0	0	666	136	3223	0	0	32	208	670	69	1444	383	2409	1417	2170	52405	19031	0.142
35.3	524.86	7.85	1	0.010269	-0.010571	0.009935	0.07673	96930	1.85	113	963	0	30	2647	1064	1535	45994	49	5846	903	240	5040	382655	0	297	1248	820	73	19	0	124	666	110	3262	0	85	111	193	644	113	1431	384	2174	1437	2910	52624	19225	0.142
35.4	525.86	7.84	1	0.010269	-0.010571	0.009935	0.07673	95165	1.85	118	1036	0	98	2667	971	1604	44082	93	5605	968	233	4908	373149	252	219	1273	723	68	20	22	210	876	257	3234	102	60	54	246	618	56	1257	269	2053	1488	2455	52201	19299	0.142
35.5	526.86	7.84	1	0.010269	-0.010571	0.009935	0.07673	96250	1.82	149	1065	0	45	2498	1021	1695	44937	91	5783	1019	257	4830	378126	26	273	1252	736	152	0	0	43	630	463	3206	0	55	27	191	677	90	1494	100	2218	1319	2907	53350	19392	0.142
35.6	527.86	7.84	1	0.010269	-0.010571	0.009935	0.07673	96545	1.85	152	1028	0	71	2528	928	1618	46791	0	5615	941	303	5110	380240	0	248	1325	861	169	28	0	97	830	174	3170	97	28	77	133	609	34	1567	687	2303	1452	3039	53171	19378	0.142
35.7	528.86	7.84	1	0.010269	-0.010571	0.009935	0.07673	98058	1.96	139	1055	0	58	2552	1013	1641	46513	20	5806	1009	262	5118	388212	11	265	1261	796	132	13	91	17	754	378	3216	27	29	85	208	687	89	1458	264	2255	1403	2403	52332	19031	0.143
35.8	529.86	7.84	1	0.010269	-0.010571	0.009935	0.07673	99386	1.88	127	1092	0	77	2556	1015	1756	47268	110	5879	1082	284	5130	394446	153	305	1350	760	61	0	0	0	634	119	3210	53	0	38	257	626	197	1530	491	2319	1588	2239	52956	19478	0.143
35.9	530.86	7.84	1	0.010269	-0.010571	0.009935	0.07673	92918	1.77	103	949	0	62	2576	1048	1561	42692	76	5353	971	290	4642	363046	15	267	1336	745	68	0	85	70	700	326	3011	0	49	128	237	641	0	1354	293	2154	1270	2682	52270	18977	0.14
36	531.86	7.83	1	0.010269	-0.010571	0.009935	0.07673	97764	1.96	100	946	0	82	2765	984	1593	45356	103	5751	969	307	5014	385221	121	261	1272	782	165	0	0	0	580	76	3270	0	0	32	311	736	81	1110	603	2397	1567	2525	53150	19597	0.143
36.1	532.86	7.83	1	0.010269	-0.010571	0.009935	0.07673	98389	1.96	173	1011	0	67	2651	951	1776	46754	68	5944	999	238	5130	388955	120	237	1245	724	164	98	79	87	799	151	3159	155	195	94	208	645	19	1571	510	2438	1443	2532	52728	18843	0.142
36.2	533.86	7.83	1	0.010269	-0.010571	0.009935	0.07673	97677	1.89	87	1056	0	61	2782	1104	1621	45789	68	5958	1043	311	5087	386227	0	221	1323	695	0	0	0	177	775	101	3136	65	0	39	149	601	114	1523	750	2251	1437	2714	52507	18952	0.142
36.3	534.86	7.83	1	0.010269	-0.010571	0.009935	0.07673	94263	1.75	115	946	0	61	2638	992	1506	43844	5	5636	946	236	4814	371166	177	231	1244	765	188	0	0	100	728	237	3030	0	66	13	186	576	28	1397	300	1853	1541	2743	52594	19075	0.139
36.4	535.86	7.83	1	0.010269	-0.010571	0.009935	0.07673	96550	1.79	109	840	0	84	2946	1066	1591	43556	39	5726	964	226	4840	380452	0	245	1272	804	122	52	28	46	771	219	2973	0	79	27	179	626	91	1276	406	2099	1470	2515	52237	19080	0.142
36.5	536.86	7.82	1	0.010269	-0.010571	0.009935	0.07673	99685	1.85	107	870	0	70	3278	1019	1638	44917	49	5872	1061	287	5000	394171	0	285	1347	919	196	120	87	189	904	372	3351	79	202	23	214	641	124	1617	257	2400	1550	2799	53717	19635	0.143
36.6	537.86	7.82	1	0.010269	-0.010571	0.009935	0.07673	95060	1.82	147	891	0	77	2749	1041	1545	43283	40	5609	934	281	4833	375936	0	251	1254	850	183	0	0	42	764	302	3093	0	82	117	207	673	68	1336	326	2197	1378	2930	51923	19103	0.141
36.7	538.86	7.82	1	0.010269	-0.010571	0.009935	0.07673	96095	1.88	114	821	0	92	2887	1031	1508	43316	84	5565	1005	287	4875	379601	0	255	1294	714	122	88	0	55	749	318	3115	0	49	23	240	608	102	1403	264	2144	1360	2796	51728	19185	0.141
36.8	539.86	7.82	1	0.010269	-0.010571	0.009935	0.07673	97319	1.83	103	751	0	68	3165	1075	1498	42806	38	5507	962	269	4971	382860	80	286	1372	769	228	0	0	0	791	0	3267	45	44	100	302	718	99	1714	897	2268	1532	2736	53314	19173	0.143
36.9	540.86	7.82	1	0.010269	-0.010571	0.009935	0.07673	94880	1.87	90	810	0	24	2801	1008	1605	42441	88	5670	1014	226	4841	375762	0	283	1254	733	180	0	54	23	718	163	3348	130	0	0	276	613	73	1563	508	2239	1307	2842	52135	18708	0.14
37	541.86	7.82	1	0.010269	-0.010571	0.009935	0.07673	97041	1.84	146	868	0	101	2988	1004	1598	43363	0	5645	964	325	5067	384144	322	259	1345	888	204	143	53	131	954	55	3314	162	115	70	180	640	57	1601	511	2237	1511	2216	53210	18994	0.142
37.1	542.86	7.81	1	0.010269	-0.010571	0.009935	0.07673	95285	1.88	146	799	0	106	2930	1012	1640	44171	113	5675	945	281	4946	378248	0	224	1364	690	152	52	0	12	751	305	3218	0	23	54	363	601	0	1609	314	2311	1463	3411	51361	18718	0.141
37.2	543.86	7.8	1	0.010269	-0.010571	0.009935	0.07673	96615	1.82	146	785	0	86	2889	1011	1585	44150	74	5709	1042	246	4925	383282	0	229	1250	843	88	0	0	21	683	198	3242	0	71	30	236	697	39	1392	413	2222	1347	3136	52090	18976	0.141
37.3	544.86	7.79	1	0.010269	-0.010571	0.009935	0.07673	95889	1.83	89	819	0	90	3058	968	1593	42580	159	5551	888	282	4826	381054	0	223	1171	684	157	134	15	152	701	258	3322	23	226	38	179	561	0	1358	270	2372	1400	2930	51784	18828	0.141
37.4	545.86	7.79	1	0.010269	-0.010571	0.009935	0.07673	99161	1.9	84	751	0	94	3651	988	1615	43921	76	5926	926	300	5304	396105	0	244	1289	681	178	0	0	71	768	223	3179	0	109	0	195	696	85	1483	319	2372	1476	3021	52791	19435	0.142
37.5	546.86	7.79	1	0.010269	-0.010571	0.009935	0.07673	96864	1.92	118	815	0	46	2740	981	1606	44350	123	6146	1030	221	5111	389173	114	235	1419	772	69	0	0	139	699	148	3296	0	0	0	261	706	129	1416	473	2407	1480	2241	50908	18522	0.141
37.6	547.86	7.79	1	0.010269	-0.010571	0.009935	0.07673	96899	1.84	90	686	0	98	3217	980	1553	42006	68	5419	1050	333	4965	383128	0	226	1383	678	112	0	58	5	761	101	3201	25	95	56	128	592	0	1267	461	2303	1453	3227	52198	19304	0.143
37.7	548.86	7.79	1	0.010269	-0.010571	0.009935	0.07673	101213	1.97	116	828	0	105	3231	1010	1718	45684	0	6157	1047	402	5307	406092	96	271	1288	830	37	22	0	0	776	59	3397	91	0	35	278	620	125	1821	679	2560	1369	2647	52827	19195	0.144
37.8	549.86	7.79	1	0.010269	-0.010571	0.009935	0.07673	95400	1.83	146	783	0	62	2883	1013	1551	44248	38	5477	986	256	4881	378917	124	242	1280	736	153	0	0	81	656	269	3224	0	140	41	193	621	173	1395	385	2038	1441	2658	51672	18680	0.14
37.9	550.86	7.78	1	0.010269	-0.010571	0.009935	0.07673	97864	1.77	78	773	0	61	3137	947	1676	43956	94	5883	972	299	4928	390708	0	236	1332	838	121	4	0	22	615	151	3323	43	161	25	231	624	53	1574	628	2366	1390	2821	51925	19308	0.142
38	551.86	7.79	1	0.010269	-0.010571	0.009935	0.07673	96666	1.92	116	843	0	150	2995	1010	1662	42926	97	5758	953	345	5046	384517	0	235	1304	737	183	33	0	100	912	32	3285	26	60	37	203	567	261	1548	594	2270	1515	2700	52296	18928	0.141
38.1	552.86	7.8	1	0.010269	-0.010571	0.009935	0.07673	93260	1.86	102	748	0	54	2699	1080	1592	42843	30	5309	1008	296	4709	366717	0	235	1210	738	0	0	0	181	741	211	3116	19	153	102	266	594	212	1396	368	2093	1315	2753	51214	18868	0.14
38.2	553.86	7.79	1	0.010269	-0.010571	0.009935	0.07673	94324	1.75	126	728	0	49	2881	1069	1571	42873	0	5445	948	238	5026	374860	83	295	1334	838	126	61	79	208	647	0	3222	0	0	70	196	649	0	1657	584	2468	1317	2268	50458	18637	0.14
38.3	554.86	7.79	1	0.010269	-0.010571	0.009935	0.07673	95393	1.81	115	722	0	121	2869	1076	1523	42587	110	5589	998	304	4932	379628	0	195	1228	723	61	0	0	110	731	173	3267	61	143	65	358	563	0	1608	281	2159	1341	3142	51522	18871	0.141
38.4	555.86	7.79	1	0.010269	-0.010571	0.009935	0.07673	96004	1.9	103	779	0	75	2962	1088	1528	43486	92	5821	965	224	4887	381752	0	232	1306	712	76	0	0	131	761	135	3334	35	290	20	234	634	141	1320	506	2315	1433	2945	51883	19134	0.141
38.5	556.86	7.79	1	0.010269	-0.010571	0.009935	0.07673	95986	1.88	103	789	0	90	2717	1090	1702	45014	87	5864	909	267	4995	383658	0	254	1307	661	76	70	68	111	654	147	3173	0	0	30	246	588	0	1690	521	2366	1423	3042	51563	18444	0.14
38.6	557.86	7.79	1	0.010269	-0.010571	0.009935	0.07673	92532	1.79	94	612	0	74	3050	1050	1498	40014	31	5308	874	270	4684	366268	0	304	1198	708	211	73	62	121	735	0	3244	116	93	61	274	598	20	1412	636	2219	1330	2982	51263	18660	0.139
38.7	558.86	7.78	1	0.010269	-0.010571	0.009935	0.07673	96379	1.78	93	676	0	103	2916	1038	1633	43871	98	5617	995	322	4940	386196	0	177	1337	784	134	60	139	73	654	469	3299	0	10	72	241	648	19	1686	139	2443	1466	2689	50647	18966	0.141
38.8	559.86	7.79	1	0.010269	-0.010571	0.009935	0.07673	96164	1.82	99	805	0	37	2714	1013	1666	44771	13	5737	987	242	4897	386394	46	236	1356	794	123	0	121	0	724	205	3337	0	120	82	286	665	0	1522	258	2214	1399	2799	49782	18319	0.14
38.9	560.86	7.79	1	0.010269	-0.010571	0.009935	0.07673	96608	1.84	108	863	0	101	2805	990	1652	43787	41	5737	1070	259	5007	387734	146	218	1476	676	179	6	8	112	620	177	3295	0	58	10	185	657	71	1507	414	1991	1586	2927	50709	18389	0.14
39	561.86	7.8	1	0.010269	-0.010571	0.009935	0.07673	96869	1.92	105	719	0	49	2966	991	1554	42672	62	5625	949	242	4866	386718	0	212	1411	878	165	122	177	96	750	281	3412	0	0	49	265	669	103	1477	410	2510	1347	2603	51425	19263	0.141
39.1	562.86	7.8	1	0.010269	-0.010571	0.009935	0.07673	94412	1.77	117	751	0	59	2892	1148	1602	41816	70	5518	936	299	4786	374750	56	335	1398	877	179	16	247	89	610	345	3528	100	94	65	151	654	0	1368	282	2281	1364	2509	51312	19105	0.14
39.2	563.86	7.8	1	0.010269	-0.010571	0.009935	0.07673	92588	1.72	108	749	0	92	2759	1077	1516	41328	50	5339	868	285	4755	367068	0	253	1266	775	100	0	0	0	583	224	3177	0	0	69	248	591	85	1418	263	2263	1301	2787	50921	18290	0.138
39.3	564.86	7.79	1	0.010269	-0.010571	0.009935	0.07673	91596	1.8	110	660	0	64	2986	1078	1444	39551	0	5166	937	334	4766	363431	0	292	1328	770	128	0	0	91	766	286	3310	0	0	92	216	560	75	1640	293	2304	1425	3058	49764	18294	0.138
39.4	565.86	7.8	1	0.010269	-0.010571	0.009935	0.07673	92537	1.7	70	632	0	101	2934	1125	1542	39657	86	5434	959	340	4595	366049	23	244	1260	754	34	0	0	24	689	35	3364	87	57	36	326	628	51	1404	410	2173	1237	2365	50711	18879	0.139
39.5	566.86	7.8	1	0.010269	-0.010571	0.009935	0.07673	94759	1.81	119	709	0	78	3263	1097	1607	42280	107	5621	952	279	4707	376694	0	217	1261	763	0	0	123	144	757	4	3481	142	35	84	316	582	0	1410	731	2317	1437	3225	50940	18824	0.14
39.6	567.86	7.8	1	0.010269	-0.010571	0.009935	0.07673	94830	1.79	117	702	0	98	2798	1088	1511	42866	0	5586	979	262	5113	375398	0	231	1356	727	153	41	0	102	775	123	3427	38	107	79	195	536	59	1373	474	2680	1320	2357	52042	19190	0.141
39.7	568.86	7.8	1	0.010269	-0.010571	0.009935	0.07673	97314	1.84	92	672	0	81	3273	1144	1631	42375	43	5568	971	294	5058	382768	69	217	1415	912	188	113	0	122	676	320	3516	0	74	52	251	685	141	1480	382	2253	1328	2733	52950	19126	0.143
39.8	569.86	7.79	1	0.010269	-0.010571	0.009935	0.07673	97413	1.81	90	762	0	80	2999	1242	1524	43116	23	5538	1064	258	4872	382829	30	254	1394	759	117	26	0	79	850	237	3591	40	224	70	224	599	72	1454	404	2278	1271	2324	54022	19624	0.143
39.9	570.86	7.79	1	0.010269	-0.010571	0.009935	0.07673	101919	2.02	145	1003	0	86	2686	1227	1837	48225	0	6156	1061	254	5171	403400	237	301	1501	736	261	0	7	45	682	303	3651	79	213	65	149	680	123	1600	373	2395	1491	2250	54442	19892	0.147
40	571.86	7.78	1	0.010269	-0.010571	0.009935	0.07673	98285	2.01	159	1107	0	79	2251	1284	1736	48908	25	6004	1084	233	5075	392382	254	288	1427	834	74	0	0	118	597	368	3644	0	109	105	192	710	177	1427	225	2385	1533	1945	52850	19435	0.143
40.1	572.86	7.76	1	0.010269	-0.010571	0.009935	0.07673	83959	1.65	127	834	0	10	1654	1230	1397	39050	61	5082	889	143	4298	326191	0	271	1072	682	0	33	15	134	558	144	3238	251	0	0	187	457	70	1046	349	1769	1203	2817	48941	17679	0.135
40.2	573.86	7.74	1	0.010269	-0.010571	0.009935	0.07673	81048	1.65	133	798	9	45	1652	1238	1321	38063	77	4969	810	265	4047	317053	0	225	1164	569	95	0	0	55	607	240	2843	0	0	48	149	504	47	1179	223	1947	1112	2961	47013	17124	0.131
40.3	574.86	7.74	1	0.010269	-0.010571	0.009935	0.07673	81982	1.67	94	819	0	66	1698	1205	1352	37214	22	4779	780	180	4059	319336	0	295	1111	679	138	0	61	140	527	154	3141	62	132	67	106	482	0	1436	334	1773	1232	3210	48078	17558	0.133
40.4	575.86	7.75	1	0.010269	-0.010571	0.009935	0.07673	89016	1.77	63	915	0	66	1799	1127	1511	41942	0	5289	904	207	4472	350254	36	230	1189	778	0	0	0	31	631	102	3430	292	21	27	299	585	201	1227	402	1965	1294	2544	50244	18781	0.137
40.5	576.86	7.75	1	0.010269	-0.010571	0.009935	0.07673	90789	1.96	91	984	0	53	1787	1318	1611	44865	102	5588	823	265	4827	362768	0	286	1339	733	60	0	0	0	548	167	3265	235	136	80	204	544	0	1482	589	2198	1261	2747	49876	18619	0.137
40.6	577.86	7.74	1	0.010269	-0.010571	0.009935	0.07673	84153	1.71	105	901	0	83	1621	1231	1516	40153	71	5150	802	257	4234	331424	0	204	1232	746	34	0	0	14	583	227	3021	0	0	23	154	585	211	1116	346	1881	1226	2886	48430	17362	0.134
40.7	578.86	7.72	1	0.010269	-0.010571	0.009935	0.07673	79697	1.65	142	835	0	65	1643	1158	1236	37396	0	4677	775	175	4058	309424	57	254	1141	573	83	58	52	76	564	0	2827	198	138	102	98	508	56	1061	610	1970	1089	2186	47317	17479	0.131
40.8	579.86	7.73	1	0.010269	-0.010571	0.009935	0.07673	88491	1.76	126	804	0	67	2216	1103	1445	39528	11	5130	942	201	4462	343423	0	287	1109	727	99	0	133	122	688	73	3082	168	21	73	182	501	0	1347	461	2066	1240	3146	50921	18838	0.138
40.9	580.86	7.73	1	0.010269	-0.010571	0.009935	0.07673	91944	1.73	124	917	0	81	2325	1092	1538	42310	89	5484	893	251	4661	361662	97	235	1332	711	116	24	102	46	620	305	2914	39	103	62	252	594	11	1364	290	2074	1401	2156	51206	18663	0.139
41	581.86	7.73	1	0.010269	-0.010571	0.009935	0.07673	91409	1.94	96	973	0	50	2070	1072	1593	49031	0	5534	974	237	4664	358529	0	269	1272	749	198	0	0	0	709	322	3255	0	104	69	170	656	26	1302	78	2284	1310	2689	50016	18555	0.138
41.1	582.86	7.72	1	0.010269	-0.010571	0.009935	0.07673	94323	1.78	79	1041	0	89	2038	1055	1680	46078	37	5539	988	314	4733	374869	0	226	1190	772	98	0	0	0	625	34	3320	10	0	128	172	576	102	1276	630	2355	1436	2715	51552	18373	0.14
41.2	583.86	7.72	1	0.010269	-0.010571	0.009935	0.07673	95720	1.89	128	1019	0	40	2089	1062	1741	46437	15	6118	1005	300	5148	385538	0	197	1271	763	93	42	0	20	666	223	3443	0	152	74	162	496	120	1394	344	2315	1451	2573	50313	18594	0.14
41.3	584.86	7.72	1	0.010269	-0.010571	0.009935	0.07673	89777	1.74	142	828	0	51	2381	1050	1499	40333	33	5292	838	248	4467	355740	0	240	1295	735	88	36	0	0	702	241	3280	6	24	63	212	662	197	1252	214	2402	1347	3023	49979	18325	0.137
41.4	585.86	7.72	1	0.010269	-0.010571	0.009935	0.07673	94982	1.86	94	828	0	73	2840	1036	1662	41636	67	5521	984	281	4664	380465	0	205	1203	751	146	6	0	64	593	209	3512	78	181	64	324	542	108	1482	425	2173	1337	3745	51323	18581	0.14
41.5	586.86	7.71	1	0.010269	-0.010571	0.009935	0.07673	96208	1.85	124	731	0	122	3285	992	1613	40650	22	5682	932	319	4910	385715	0	263	1277	777	14	0	87	57	655	209	3630	79	66	28	297	583	44	1428	521	2205	1398	3107	51437	19009	0.14
41.6	587.86	7.71	1	0.010269	-0.010571	0.009935	0.07673	92683	1.75	109	788	0	83	2882	1024	1584	40853	85	5357	1033	249	4912	368673	0	330	1349	817	84	15	0	137	698	109	3400	49	0	73	131	533	0	1211	582	2175	1286	3092	50649	18376	0.138
41.7	588.86	7.73	1	0.010269	-0.010571	0.009935	0.07673	88824	1.72	125	719	0	86	2701	1028	1426	37209	80	5310	881	264	4542	355411	0	304	1341	770	265	56	97	182	774	192	3132	125	0	50	204	680	126	1356	417	2070	1362	3079	49535	18111	0.135
41.8	589.86	7.72	1	0.010269	-0.010571	0.009935	0.07673	83646	1.73	124	609	0	64	2909	1090	1371	34932	0	4840	822	261	4289	337317	0	194	1239	703	84	0	0	159	568	74	3023	0	0	75	164	555	0	940	383	2032	1282	2702	44895	16156	0.131

## Sheet: SW-20
Depth	position (mm)	sample surface	validity	E-gain	E-offset	F-slope	F-offset	cps	MSE	Al	Si	P	S	Cl	Ar	K	Ca	Sc	Ti	V	Cr	Mn	Fe	Co	Ni	Cu	Zn	Ga	Ge	As	Se	Br	Rb	Sr	Y	Zr	Ba	Ta	W	Pb	Fe a*2	Fe a+b	S1	S2	S3	Mo inc	Mo coh	Dt	Inc+coh
0	58.81	7.88	1	0.010269	-0.010571	0.009935	0.07673	89484	1.86	97	246	110	475	5746	1327	1044	10106	0	1544	130	77	1158	105844	1183	621	569	0	0	0	23	438	3953	0	592	0	0	0	846	874	122	314	38	425	562	0	116355	20068	0.186	136423
0.1	59.81	7.82	1	0.010269	-0.010571	0.009935	0.07673	88950	1.67	83	451	27	317	3966	1066	1203	16753	0	2761	480	187	2072	181083	1019	441	775	172	0	0	0	52	2719	9	1040	0	360	0	577	637	113	702	264	864	767	0	100365	19624	0.174	119989
0.2	60.81	7.78	1	0.010269	-0.010571	0.009935	0.07673	96774	1.85	129	1013	57	215	3027	983	1837	30030	37	4965	769	313	3593	312327	858	380	1180	660	0	0	0	183	1782	59	1981	0	211	43	417	639	215	775	390	1870	1373	611	77565	17989	0.157	95554
0.3	61.81	7.78	1	0.010269	-0.010571	0.009935	0.07673	100118	1.79	139	1108	0	164	2573	870	2044	36110	16	6041	977	285	4552	383514	202	253	1327	879	77	0	158	0	1024	156	2961	35	209	0	206	607	0	1453	559	2485	1404	1664	59913	19454	0.148	79367
0.4	62.81	7.79	1	0.010269	-0.010571	0.009935	0.07673	100901	1.99	121	1091	0	113	2542	981	2022	37281	50	6277	989	333	4817	398050	44	294	1339	790	169	0	0	70	915	60	2926	0	304	45	300	594	127	1383	446	2465	1443	2187	57051	18940	0.147	75991
0.5	63.81	7.8	1	0.010269	-0.010571	0.009935	0.07673	100783	1.95	146	1171	0	113	2413	973	2108	36939	35	6213	1098	305	4669	399048	0	307	1317	884	0	36	4	134	754	334	2910	70	90	30	228	536	153	1402	380	2537	1583	2573	57799	19202	0.146	77001
0.6	64.81	7.81	1	0.010269	-0.010571	0.009935	0.07673	101746	1.98	160	1230	0	139	2405	853	2103	39472	40	6367	1179	257	5003	412950	43	214	1409	913	109	69	211	121	649	253	3278	58	0	85	277	620	0	1717	516	2733	1668	2560	54311	18492	0.144	72803
0.7	65.81	7.81	1	0.010269	-0.010571	0.009935	0.07673	96949	1.88	150	1128	0	117	2316	954	2006	42444	42	5972	1014	274	4907	392640	0	299	1168	757	58	53	0	15	669	182	3091	0	0	117	372	544	102	1437	467	2292	1524	3073	51491	18627	0.141	70118
0.8	66.81	7.82	1	0.010269	-0.010571	0.009935	0.07673	95442	1.86	105	1232	0	103	2185	1035	1917	42885	0	5907	965	354	4922	385354	27	231	1333	804	248	57	0	80	604	225	2966	52	119	44	195	633	44	1435	428	2364	1426	2445	50934	18487	0.14	69421
0.9	67.81	7.82	1	0.010269	-0.010571	0.009935	0.07673	96759	1.91	136	1311	0	128	2085	1016	2012	45120	26	6093	1030	260	4952	394685	0	216	1290	795	180	63	108	140	548	105	3009	155	101	98	189	477	0	1600	297	2237	1545	2856	49588	18601	0.14	68189
1	68.81	7.82	1	0.010269	-0.010571	0.009935	0.07673	101667	1.89	153	1270	0	82	2104	953	1992	43503	70	6465	1046	312	4848	411813	235	229	1461	712	113	0	0	154	795	452	3069	82	211	97	150	563	112	1651	294	2305	1652	2410	54132	19160	0.145	73292
1.1	69.81	7.83	1	0.010269	-0.010571	0.009935	0.07673	108220	2.17	186	1744	0	60	2245	1022	2260	56309	57	7324	1268	290	5814	448725	0	267	1372	861	187	5	50	44	666	196	3458	11	193	85	167	625	0	2120	642	2836	1723	2961	51862	19542	0.147	71404
1.2	70.81	7.85	1	0.010269	-0.010571	0.009935	0.07673	95437	1.81	163	1444	0	112	2360	1153	1642	52324	82	5945	1025	329	4941	378230	117	274	1253	779	169	123	10	0	639	86	3326	94	123	45	157	544	0	1585	574	2210	1357	2165	51946	19025	0.141	70971
1.3	71.81	7.86	1	0.010269	-0.010571	0.009935	0.07673	86997	1.81	124	1334	0	32	2062	1183	1425	44848	0	5412	981	219	4333	344930	0	234	1065	690	95	0	0	0	469	376	2989	140	0	0	173	407	57	1034	286	2009	1202	2186	50152	18245	0.135	68397
1.4	72.81	7.84	1	0.010269	-0.010571	0.009935	0.07673	82825	1.8	162	1319	0	59	2011	1188	1482	44372	0	5089	868	265	4406	333651	273	244	1214	723	121	0	0	51	432	253	2650	0	60	130	240	517	0	1109	358	1891	1405	1959	45501	16933	0.13	62434
1.5	73.81	7.82	1	0.010269	-0.010571	0.009935	0.07673	74818	1.8	133	1126	0	54	1775	1121	1266	38007	0	4601	838	186	4008	299530	193	198	1021	679	125	0	0	0	347	300	2614	79	169	53	51	478	5	895	316	1960	1165	1523	42426	16136	0.124	58562
1.6	74.81	7.83	1	0.010269	-0.010571	0.009935	0.07673	69752	1.49	118	1027	0	17	1628	1117	1134	36119	33	4228	739	308	3595	276080	118	213	908	481	79	0	40	0	450	118	2472	0	66	31	123	461	29	1025	396	1637	1094	1699	40642	15572	0.122	56214
1.7	75.81	7.84	1	0.010269	-0.010571	0.009935	0.07673	83959	1.85	124	1149	0	61	1943	1042	1330	41611	112	4901	904	247	4261	332909	0	257	1101	619	69	0	0	0	565	313	2925	59	36	0	103	583	143	1095	112	1979	1151	3113	47680	18108	0.134	65788
1.8	76.81	7.84	1	0.010269	-0.010571	0.009935	0.07673	97703	2.1	158	1539	0	82	2589	998	1714	51340	40	6115	1145	280	5160	397364	0	270	1362	848	96	0	0	0	545	216	3111	26	53	55	102	568	0	1339	355	2341	1407	2612	50961	18895	0.141	69856
1.9	77.81	7.84	1	0.010269	-0.010571	0.009935	0.07673	89637	1.94	134	1340	0	108	2169	1088	1681	46730	9	5405	965	242	4791	360986	39	266	1252	691	91	0	0	138	462	278	3020	80	100	55	162	561	234	1147	114	2333	1248	1707	48652	18179	0.135	66831
2	78.81	7.83	1	0.010269	-0.010571	0.009935	0.07673	95840	1.96	148	1432	0	51	2392	963	1578	50453	0	5886	991	230	5031	385417	464	273	1422	859	207	20	0	118	515	73	3237	152	225	77	184	662	0	1643	623	2303	1389	1614	51263	18985	0.14	70248
2.1	79.81	7.84	1	0.010269	-0.010571	0.009935	0.07673	88061	1.9	151	1326	0	24	2271	1112	1641	46623	89	5626	980	227	4738	355560	12	210	1189	807	215	0	0	64	573	126	2982	55	0	86	143	521	76	1126	507	2291	1299	2064	47209	17716	0.135	64925
2.2	80.81	7.81	1	0.010269	-0.010571	0.009935	0.07673	91259	1.98	142	1362	0	52	2366	1037	1637	48014	52	5670	930	273	4849	369275	0	245	1222	797	109	67	0	0	480	214	2893	73	139	103	192	482	167	1250	482	2543	1494	1932	48930	18227	0.137	67157
2.3	81.81	7.81	1	0.010269	-0.010571	0.009935	0.07673	90415	1.8	186	1360	0	45	2199	1101	1464	47414	0	5735	929	282	4787	363539	13	264	1194	702	118	0	0	60	457	278	3072	0	161	14	141	540	117	1262	364	2280	1274	2140	48918	18370	0.136	67288
2.4	82.81	7.8	1	0.010269	-0.010571	0.009935	0.07673	93597	2	160	1443	0	69	2326	1017	1740	50004	148	6003	967	282	5083	380940	0	160	1370	642	44	0	0	59	579	129	3047	115	138	72	111	570	87	1482	632	2372	1409	2182	48326	18517	0.138	66843
2.5	83.81	7.78	1	0.010269	-0.010571	0.009935	0.07673	89820	1.82	162	1291	0	44	2455	1019	1535	45226	0	5451	1032	184	4649	359547	72	223	1234	685	125	0	0	25	567	291	3087	77	289	97	214	522	236	1234	449	1928	1319	2433	49676	18812	0.136	68488
2.6	84.81	7.78	1	0.010269	-0.010571	0.009935	0.07673	101627	2	243	1554	0	78	2729	1109	1791	52350	37	6393	1037	322	5387	413465	216	207	1443	886	182	42	0	92	591	243	3249	24	54	104	136	615	109	1685	199	2246	1590	2095	52650	19580	0.144	72230
2.7	85.81	7.79	1	0.010269	-0.010571	0.009935	0.07673	81859	1.88	145	1147	0	40	2128	1142	1385	38709	47	4816	808	250	4202	321560	250	288	1155	721	115	0	0	48	550	206	2752	147	19	14	106	558	63	963	286	1926	1118	1625	47452	17686	0.133	65138
2.8	86.81	7.79	1	0.010269	-0.010571	0.009935	0.07673	93936	1.83	152	1298	0	51	2470	1145	1527	46715	57	5604	902	366	5055	371463	55	324	1289	759	82	0	0	0	566	136	2985	184	29	75	214	578	134	1238	636	2144	1310	2027	53223	19196	0.14	72419
2.9	87.81	7.79	0	0.010269	-0.010571	0.009935	0.07673	89894	1.78	140	1243	0	43	2405	1281	1472	45787	120	5430	939	328	4540	354791	0	261	1187	739	183	0	0	116	669	292	3207	7	0	4	80	527	223	1255	131	2169	1333	2309	50624	18688	0.138	69312
3	88.81	7.79	0	0.010269	-0.010571	0.009935	0.07673	74266	1.69	108	1037	0	82	1930	1259	1226	35688	40	4512	788	208	3807	287541	213	259	1038	638	81	0	0	4	619	267	2688	18	0	55	124	503	76	986	344	1689	1092	1654	45524	16831	0.127	62355
3.1	89.81	7.79	0	0.010269	-0.010571	0.009935	0.07673	70900	1.68	103	1004	0	64	1775	1236	1232	35855	0	4254	825	173	3739	283717	38	235	991	524	98	0	0	69	420	168	2344	0	145	5	137	444	129	925	418	1714	1058	1763	40169	15317	0.122	55486
3.2	90.81	7.79	0	0.010269	-0.010571	0.009935	0.07673	61779	1.47	98	857	0	25	1477	1146	978	30397	0	3549	670	180	3028	235841	112	193	778	551	58	0	0	86	430	83	2162	0	208	0	188	321	117	518	238	1475	896	1285	39207	14949	0.119	54156
3.3	91.81	7.79	1	0.010269	-0.010571	0.009935	0.07673	86807	1.76	106	1111	0	26	2173	1120	1442	41539	93	5129	860	274	4281	338528	264	263	1277	714	194	0	0	0	526	82	2823	150	0	97	136	496	141	1163	624	1864	1261	2147	50565	18678	0.137	69243
3.4	92.81	7.79	1	0.010269	-0.010571	0.009935	0.07673	96479	1.94	155	1357	0	105	2641	1189	1641	51963	90	5816	1063	250	5085	384226	275	332	1361	743	161	0	0	134	595	184	3560	18	37	65	217	592	140	1346	527	2499	1531	1800	52451	19236	0.14	71687
3.5	93.81	7.79	1	0.010269	-0.010571	0.009935	0.07673	81225	1.86	138	1113	0	13	1995	1204	1314	39326	31	4751	860	251	4130	320728	336	253	1127	678	151	0	0	0	511	28	2741	77	0	35	126	602	147	1174	249	1959	1187	1774	47244	17069	0.131	64313
3.6	94.81	7.79	1	0.010269	-0.010571	0.009935	0.07673	77294	1.76	131	1151	0	71	1953	1169	1328	39380	35	4837	892	229	4132	316810	0	179	1133	649	38	45	0	0	419	103	2313	99	33	12	183	506	142	988	510	1885	1180	2121	42400	15772	0.124	58172
3.7	95.81	7.8	1	0.010269	-0.010571	0.009935	0.07673	58076	1.53	105	796	0	29	1245	1088	877	28604	0	3309	499	202	2817	223279	0	171	727	468	0	0	0	18	323	355	2065	19	103	55	179	299	125	457	0	1254	848	1462	37087	13619	0.116	50706
3.8	96.81	7.82	1	0.010269	-0.010571	0.009935	0.07673	60735	1.56	111	828	0	15	1421	1051	1008	32082	7	3503	566	190	3019	229101	0	221	759	516	96	0	0	25	455	155	2220	17	0	31	252	433	141	605	256	1506	853	1693	38202	14489	0.119	52691
3.9	97.81	7.86	1	0.010269	-0.010571	0.009935	0.07673	78730	1.58	130	1120	0	30	1868	1072	1271	40036	123	4422	792	191	3920	303266	0	238	1038	548	0	0	0	0	547	103	2986	134	232	55	228	476	99	1071	222	1839	989	2609	46953	17768	0.132	64721
4	98.81	7.87	1	0.010269	-0.010571	0.009935	0.07673	93569	1.93	189	1493	0	59	2389	1126	1629	48571	83	5783	970	303	4954	381029	0	192	1226	825	164	0	0	0	536	310	3068	154	76	49	205	581	185	1502	335	2257	1450	2470	49648	18604	0.137	68252
4.1	99.81	7.87	1	0.010269	-0.010571	0.009935	0.07673	80434	1.85	116	1173	0	36	1813	1164	1321	42427	66	4844	841	264	4156	321216	0	242	1020	580	39	0	0	0	499	298	2718	106	129	20	177	511	104	1084	148	1926	1193	2802	45794	17066	0.129	62860
4.2	100.81	7.83	1	0.010269	-0.010571	0.009935	0.07673	88791	1.85	109	1347	0	11	2241	1128	1442	48705	115	5403	939	250	4480	347781	0	190	1164	704	11	0	0	0	571	117	3066	87	0	52	206	482	54	1430	512	2064	1275	2519	50006	18547	0.137	68553
4.3	101.81	7.83	1	0.010269	-0.010571	0.009935	0.07673	84645	1.83	125	1216	0	27	2061	1062	1368	44834	0	5052	939	189	4514	338511	77	261	1143	638	125	0	0	0	347	423	5048	0	35	85	150	514	0	980	252	1866	1283	2200	46689	17272	0.132	63961
4.4	102.81	7.84	1	0.010269	-0.010571	0.009935	0.07673	72272	1.67	108	1048	0	22	1591	1022	1132	37899	91	4222	745	217	3814	283164	183	261	928	599	39	0	0	55	422	115	2645	60	165	6	178	415	19	1017	382	1522	1152	1840	43143	16387	0.125	59530
4.5	103.81	7.85	1	0.010269	-0.010571	0.009935	0.07673	79834	1.69	124	1130	0	53	1909	983	1274	40478	0	4679	692	278	4142	316735	151	258	1168	621	34	117	0	0	443	200	2716	67	66	34	124	527	63	814	431	1746	1205	1925	46141	17419	0.13	63560
4.6	104.81	7.84	1	0.010269	-0.010571	0.009935	0.07673	66120	1.63	120	1330	0	55	1566	957	1115	34875	64	4207	777	254	3583	278756	91	214	909	523	93	0	37	109	382	164	2243	11	54	111	174	397	0	891	255	1753	998	1536	35187	13320	0.114	48507
4.7	105.81	7.84	1	0.010269	-0.010571	0.009935	0.07673	29260	1.36	77	580	0	16	609	868	586	15691	0	2081	336	61	1522	121147	0	92	426	256	98	0	35	30	154	9	796	60	0	0	46	222	0	200	102	570	477	1132	17107	6553	0.091	23660
4.8	106.81	7.88	1	0.010269	-0.010571	0.009935	0.07673	37111	1.29	71	546	4	0	650	729	516	19038	35	1881	281	123	1707	130279	0	135	463	241	0	0	0	132	344	155	1592	66	67	5	125	206	37	299	139	862	534	1040	26726	10585	0.106	37311
4.9	107.81	7.96	1	0.010269	-0.010571	0.009935	0.07673	64260	1.65	140	1113	0	73	1504	794	1078	52848	0	3458	588	175	3135	235277	0	172	725	501	86	0	18	69	371	79	5941	95	119	11	106	456	75	559	335	1326	892	1896	38127	15092	0.119	53219
5	108.81	8.04	1	0.010269	-0.010571	0.009935	0.07673	78661	1.83	129	1181	0	28	1725	978	1310	45247	81	4663	849	206	3960	302037	0	259	1118	540	84	0	0	0	501	204	3945	120	99	63	163	522	88	1043	315	1812	1121	1954	45922	17321	0.13	63243
5.1	109.81	8.07	1	0.010269	-0.010571	0.009935	0.07673	101046	2.08	172	1603	0	78	2587	1051	1827	56772	92	6284	1047	307	5201	402761	0	183	1284	782	63	0	0	49	578	236	3557	18	159	59	216	556	22	1606	391	2387	1537	2196	53210	19979	0.144	73189
5.2	110.81	8.09	1	0.010269	-0.010571	0.009935	0.07673	94463	1.97	175	1366	0	40	2225	1167	1606	49356	42	5661	997	297	4841	373479	0	331	1291	822	148	0	0	0	614	357	3319	43	246	95	124	583	140	1385	111	2173	1366	2602	52427	19149	0.141	71576
5.3	111.81	8.06	1	0.010269	-0.010571	0.009935	0.07673	85395	1.92	171	1334	0	23	2043	1293	1508	48299	71	4963	930	249	4286	335727	111	250	1214	676	115	0	0	0	509	385	3170	49	106	95	106	553	42	1180	112	1966	1276	1845	48818	18229	0.134	67047
5.4	112.81	8.04	1	0.010269	-0.010571	0.009935	0.07673	83586	1.83	198	1198	0	30	2040	1216	1423	45452	5	5018	917	319	4253	331078	5	215	1160	705	163	0	0	130	490	237	2977	114	150	25	154	464	12	1407	301	1778	1200	2277	47391	17872	0.132	65263
5.5	113.81	8.02	1	0.010269	-0.010571	0.009935	0.07673	76568	1.68	116	997	0	47	1874	1194	1223	39020	99	4474	792	251	3917	300502	558	236	1071	669	89	10	0	91	439	260	2877	0	172	57	149	441	16	1025	89	1731	1156	1049	44704	16485	0.128	61189
5.6	114.81	8	1	0.010269	-0.010571	0.009935	0.07673	85651	1.78	100	1285	0	12	2187	1097	1383	44312	38	5228	887	246	4665	338999	344	253	1201	713	116	0	53	55	459	167	2949	131	188	0	153	487	0	1177	363	1835	1246	1724	48190	18156	0.134	66346
5.7	115.81	8	1	0.010269	-0.010571	0.009935	0.07673	89179	1.83	144	1291	0	35	2321	1098	1484	48653	113	5357	928	284	4526	354998	201	239	1127	793	91	0	26	32	635	358	3195	31	172	89	179	597	31	1357	496	2032	1342	2046	49321	18486	0.136	67807
5.8	116.81	8.02	1	0.010269	-0.010571	0.009935	0.07673	78395	1.79	154	1246	0	72	1776	1153	1354	39428	0	4840	820	217	4056	313198	0	221	1027	485	33	0	0	0	579	245	2847	144	254	27	143	455	124	1001	467	1985	1140	2132	44934	16875	0.128	61809
5.9	117.81	8.02	1	0.010269	-0.010571	0.009935	0.07673	78695	1.71	173	1239	0	46	1966	1275	1364	43738	30	4810	756	262	4016	309613	0	296	1102	666	7	0	0	122	562	273	2838	55	57	10	169	513	110	882	206	1882	1216	1963	45497	16948	0.128	62445
6	118.81	8.01	1	0.010269	-0.010571	0.009935	0.07673	81199	1.78	201	1149	0	17	2180	1126	1402	41142	81	4951	831	205	4208	321795	0	254	1088	729	75	0	0	0	456	231	2728	0	170	64	181	484	16	1133	266	2069	1112	2367	45614	17192	0.13	62806
6.1	119.81	8.02	1	0.010269	-0.010571	0.009935	0.07673	93019	1.94	165	1292	0	63	2308	1137	1685	47723	31	5797	942	249	4917	378179	0	268	1259	851	136	70	0	43	709	211	3087	133	95	75	127	485	86	1474	544	2345	1337	2603	49188	18287	0.137	67475
6.2	120.81	8.01	1	0.010269	-0.010571	0.009935	0.07673	84047	1.67	105	1204	0	14	2059	1091	1411	43061	31	4971	864	236	4426	331431	229	278	1113	576	154	0	0	0	515	195	2866	0	212	46	223	610	117	983	301	2022	1343	1683	47898	18040	0.133	65938
6.3	121.81	8.02	1	0.010269	-0.010571	0.009935	0.07673	93181	1.98	100	1269	0	58	2540	1149	1638	47870	81	5685	895	270	4750	373227	0	265	1080	692	168	0	93	118	705	165	2830	0	5	74	209	643	0	1460	376	2172	1287	2493	49566	18225	0.138	67791
6.4	122.81	8.01	1	0.010269	-0.010571	0.009935	0.07673	81215	1.74	119	998	0	55	2001	1155	1354	39448	137	4668	832	268	4079	315786	0	227	1054	638	63	16	0	74	544	113	2765	198	151	43	65	507	0	1091	327	2038	1095	2240	47489	17574	0.132	65063
6.5	123.81	8.03	1	0.010269	-0.010571	0.009935	0.07673	89183	1.82	153	1163	0	65	2324	1148	1517	45769	59	5344	896	284	4585	351117	0	272	1178	733	34	12	0	0	651	271	2947	52	198	70	209	431	102	1162	196	2100	1357	2668	50046	18280	0.136	68326
6.6	124.81	8.03	1	0.010269	-0.010571	0.009935	0.07673	88120	1.77	121	1177	0	66	2243	1200	1431	43552	128	5269	903	287	4632	345507	78	284	1222	637	106	0	45	61	576	245	2815	214	212	67	118	576	0	1287	257	2062	1247	2119	51039	18526	0.137	69565
6.7	125.81	8.03	1	0.010269	-0.010571	0.009935	0.07673	85145	1.79	169	1209	0	37	2240	1256	1408	42812	48	5047	882	235	4325	337419	452	275	1201	734	37	0	0	58	592	116	2743	139	51	29	232	517	131	1236	561	1818	1298	1916	48521	17753	0.134	66274
6.8	126.81	8.02	1	0.010269	-0.010571	0.009935	0.07673	76921	1.71	87	1142	0	41	1879	1158	1356	37291	76	4546	807	290	3910	300408	91	288	1047	656	88	0	0	14	501	131	2609	24	96	83	135	509	0	998	145	1714	1140	2285	45919	17035	0.129	62954
6.9	127.81	8.02	1	0.010269	-0.010571	0.009935	0.07673	86626	1.82	91	1199	0	37	2108	1193	1542	44541	35	5323	847	289	4414	348225	95	177	1189	724	56	0	0	0	521	189	2686	0	126	0	209	561	69	1391	268	2141	1219	2004	47704	17746	0.133	65450
7	128.81	8.03	1	0.010269	-0.010571	0.009935	0.07673	80786	1.75	165	1232	0	77	2096	1208	1455	41995	11	5261	870	271	4367	329286	95	226	1135	719	94	24	0	4	483	149	2620	0	0	57	200	459	91	1167	275	2092	1223	1609	43786	16280	0.128	60066
7.1	129.81	8	1	0.010269	-0.010571	0.009935	0.07673	83287	1.73	170	1228	0	54	2160	1113	1362	43860	104	4891	774	294	4327	321797	0	305	1154	710	121	0	0	37	577	43	2974	78	0	96	126	596	240	801	634	1847	1210	2664	49112	18193	0.134	67305
7.2	130.81	7.99	1	0.010269	-0.010571	0.009935	0.07673	100631	2.11	211	1498	0	116	2746	1096	1786	52808	0	6116	1099	346	5172	399625	268	246	1390	795	82	0	0	33	649	478	3191	29	154	58	136	634	114	1393	30	2569	1598	1903	55050	20058	0.145	75108
7.3	131.81	8	1	0.010269	-0.010571	0.009935	0.07673	79915	1.74	127	1117	0	72	1928	1151	1386	39963	22	4799	827	278	4149	317405	239	239	1057	670	0	0	0	0	472	81	2653	62	45	54	230	420	17	1203	516	1703	1260	2004	46730	17094	0.13	63824
7.4	132.81	8.01	1	0.010269	-0.010571	0.009935	0.07673	84457	1.75	159	1212	0	63	2174	1210	1376	42017	128	4933	914	220	4237	326745	0	253	1172	704	137	0	0	0	578	55	2764	164	41	42	148	485	0	1239	537	1949	1224	2122	51058	18363	0.135	69421
7.5	133.81	8.01	1	0.010269	-0.010571	0.009935	0.07673	84736	1.86	129	1265	0	46	2178	1215	1483	45129	0	5342	915	296	4565	341658	0	195	1198	727	14	0	0	46	362	192	2782	52	59	54	218	443	92	1186	391	1941	1286	2722	46841	17163	0.132	64004
7.6	134.81	8	1	0.010269	-0.010571	0.009935	0.07673	65602	1.58	70	889	0	60	1563	1341	1094	32198	45	3896	688	163	3326	257513	219	207	932	487	52	0	0	14	398	196	2343	109	159	58	102	342	106	697	256	1528	985	1433	40072	15471	0.12	55543
7.7	135.81	8.01	1	0.010269	-0.010571	0.009935	0.07673	83858	1.81	182	1221	0	51	2183	1177	1389	41726	53	5116	916	232	4331	336332	0	230	1121	658	107	0	0	23	474	107	3024	140	47	17	138	426	23	931	379	1980	1152	2050	46772	17502	0.132	64274
7.8	136.81	7.99	1	0.010269	-0.010571	0.009935	0.07673	79005	1.76	134	1154	0	86	1898	1203	1278	40668	44	4667	752	229	3882	306939	212	257	1155	573	35	0	0	0	442	366	2927	0	124	111	190	490	89	849	86	1637	1072	1873	47455	17546	0.13	65001
7.9	137.81	7.98	1	0.010269	-0.010571	0.009935	0.07673	82930	1.95	163	1298	0	0	1942	1116	1422	42480	46	5101	874	187	4345	335841	0	242	1207	669	118	0	0	42	548	150	2740	0	157	0	94	596	227	1059	466	2010	1328	2312	46326	17476	0.13	63802
8	138.81	7.99	1	0.010269	-0.010571	0.009935	0.07673	76903	1.75	112	1188	0	24	1909	1265	1353	39137	32	4535	843	218	4086	311201	0	260	1045	521	155	0	0	0	496	186	2573	66	95	122	0	494	100	940	190	1820	1116	2484	43097	16308	0.126	59405
8.1	139.81	7.98	1	0.010269	-0.010571	0.009935	0.07673	80387	1.86	173	1333	0	45	2013	1148	1417	42660	46	5015	841	193	4276	320347	418	250	1265	715	107	0	0	0	624	263	2755	246	60	70	109	458	0	890	231	1804	1150	1506	45783	16994	0.129	62777
8.2	140.81	7.99	1	0.010269	-0.010571	0.009935	0.07673	82354	1.8	155	1291	0	71	1968	1169	1332	43722	94	4920	933	249	4353	329046	261	256	1242	674	104	0	0	0	557	98	2764	242	0	81	72	561	135	954	421	2084	1288	1502	46450	17397	0.13	63847
8.3	141.81	7.97	1	0.010269	-0.010571	0.009935	0.07673	88890	1.91	201	1361	0	61	2169	1072	1552	46730	23	5558	744	285	4716	355685	214	325	1168	624	111	59	0	91	566	267	3075	67	13	8	191	519	125	1385	342	2064	1447	1805	48972	18514	0.135	67486
8.4	142.81	7.97	1	0.010269	-0.010571	0.009935	0.07673	86088	1.75	130	1313	0	56	2259	1184	1437	45202	0	5239	831	221	4474	337881	267	227	1116	626	48	0	0	22	557	145	2812	0	196	34	265	431	96	1197	118	1929	1335	1758	48305	18366	0.135	66671
8.5	143.81	7.95	1	0.010269	-0.010571	0.009935	0.07673	92414	1.96	187	1452	0	71	2317	1112	1557	48272	32	5559	878	294	4692	360075	93	279	1141	729	123	0	0	0	571	134	3349	91	103	39	185	543	157	1233	701	1942	1430	2040	51957	19779	0.14	71736
8.6	144.81	7.94	1	0.010269	-0.010571	0.009935	0.07673	92120	1.93	148	1372	0	66	2552	1176	1618	49660	25	5567	1087	263	4938	366376	196	280	1213	769	64	0	0	95	597	125	2992	24	98	32	227	519	54	1366	205	2272	1413	2015	49681	18289	0.138	67970
8.7	145.81	7.93	1	0.010269	-0.010571	0.009935	0.07673	79113	1.69	117	1097	0	54	1878	1161	1277	39021	17	4732	816	188	4238	308997	245	257	1006	562	81	0	0	27	602	200	2707	67	163	74	156	490	134	958	171	1594	1137	2074	47134	17379	0.131	64513
8.8	146.81	7.93	1	0.010269	-0.010571	0.009935	0.07673	84436	1.77	145	1277	0	10	2237	1107	1477	41413	8	5085	886	261	4396	338205	297	248	1208	686	154	56	0	0	500	234	2687	154	221	65	161	461	132	1165	382	1946	1192	1778	47974	17645	0.132	65619
8.9	147.81	7.96	1	0.010269	-0.010571	0.009935	0.07673	85674	1.87	186	1267	0	53	2225	1180	1528	41600	38	5202	850	285	4465	343812	72	331	1301	778	130	0	70	0	525	181	2690	74	0	69	132	563	77	1142	358	2070	1233	2041	48502	17862	0.134	66364
9	148.81	7.98	1	0.010269	-0.010571	0.009935	0.07673	73410	1.75	126	1058	0	36	1821	1245	1220	37082	69	4380	835	193	3817	287228	42	212	1027	554	146	0	0	52	483	168	2535	184	27	18	114	585	55	921	284	1663	1062	1863	44012	16323	0.127	60335
9.1	149.81	7.95	1	0.010269	-0.010571	0.009935	0.07673	86427	1.87	131	1325	0	43	2398	1245	1536	44052	79	5326	930	287	4417	346030	174	225	1210	696	0	0	0	0	402	208	2827	86	176	74	186	490	0	1115	293	1928	1366	2016	47956	18093	0.134	66049
9.2	150.81	7.93	1	0.010269	-0.010571	0.009935	0.07673	84055	1.79	135	1367	0	51	2182	1155	1512	43322	0	5298	876	281	4508	339520	151	172	1253	773	157	0	0	0	626	178	2885	46	213	9	67	576	40	1211	281	2121	1291	1714	46547	17578	0.131	64125
9.3	151.81	7.93	1	0.010269	-0.010571	0.009935	0.07673	80354	1.74	117	1207	0	57	1896	1158	1286	39042	23	4863	799	292	4193	318341	248	284	1134	703	58	0	0	63	481	338	2793	110	75	73	180	558	92	979	0	1812	1308	1884	46439	16784	0.13	63223
9.4	152.81	7.91	1	0.010269	-0.010571	0.009935	0.07673	84570	1.7	150	1209	0	41	2150	1070	1470	42393	35	5202	841	270	4360	336569	0	300	1221	722	114	0	82	59	594	367	3034	27	89	53	201	562	64	1189	284	2037	1387	2707	47805	17673	0.133	65478
9.5	153.81	7.91	1	0.010269	-0.010571	0.009935	0.07673	84732	1.73	124	1178	0	44	2207	1067	1462	47455	91	4953	853	247	4365	331831	57	221	1200	643	162	0	0	70	559	271	3272	10	108	75	54	473	319	1182	314	1841	1261	2197	48754	18100	0.134	66854
9.6	154.81	7.91	1	0.010269	-0.010571	0.009935	0.07673	87839	1.9	137	1328	0	65	2239	1137	1473	46524	0	5394	975	183	4492	347093	192	257	1142	680	127	0	0	35	633	142	2917	57	300	35	227	479	83	1093	437	2110	1257	1643	48881	18124	0.135	67005
9.7	155.81	7.91	1	0.010269	-0.010571	0.009935	0.07673	87456	1.89	121	1321	0	52	2126	1188	1543	42811	23	5315	915	210	4395	344840	0	209	1234	671	155	0	0	0	563	217	2826	29	132	0	199	537	123	1280	301	2172	1244	2296	50062	18193	0.136	68255
9.8	156.81	7.9	1	0.010269	-0.010571	0.009935	0.07673	91461	1.82	139	1362	0	67	2400	1170	1564	47620	26	5690	1047	274	4865	365529	106	245	1246	640	0	0	11	110	699	72	2906	103	73	14	245	606	23	1203	518	2164	1387	2217	49962	18235	0.137	68197
9.9	157.81	7.89	1	0.010269	-0.010571	0.009935	0.07673	89306	1.72	121	1304	0	75	2259	1166	1576	44926	0	5427	941	291	4538	355343	0	241	1205	628	110	0	0	0	519	288	3095	175	151	47	256	393	0	1367	297	2005	1349	2541	50229	18435	0.136	68664
10	158.81	7.88	1	0.010269	-0.010571	0.009935	0.07673	84812	1.85	155	1256	0	56	2216	1121	1466	43206	74	5190	783	290	4451	337555	0	231	1198	696	102	22	0	7	617	63	2927	8	0	88	93	521	140	1009	606	2079	1297	2687	48132	17631	0.133	65763
10.1	159.81	7.86	1	0.010269	-0.010571	0.009935	0.07673	86221	1.82	149	1360	0	25	2162	1014	1479	45071	0	5169	891	178	4500	346073	84	265	1225	809	41	9	0	0	580	208	2916	67	0	50	86	545	0	1028	383	1930	1283	2157	47856	18209	0.133	66065
10.2	160.81	7.88	1	0.010269	-0.010571	0.009935	0.07673	86934	1.8	143	1240	0	49	2240	1167	1452	45311	76	5312	982	353	4591	350313	341	245	1233	781	112	0	8	33	491	206	2734	64	111	106	197	525	0	1158	513	2075	1475	2011	47215	17792	0.133	65007
10.3	161.81	7.89	1	0.010269	-0.010571	0.009935	0.07673	80908	1.84	147	1202	0	83	2003	1198	1381	38688	20	5046	843	230	4104	318898	0	266	1127	692	116	0	0	0	552	141	2833	128	135	42	44	575	161	913	213	1814	1167	2380	46707	17228	0.131	63935
10.4	162.81	7.9	1	0.010269	-0.010571	0.009935	0.07673	82273	1.76	123	1241	0	66	2024	1188	1389	41345	39	4894	866	239	4251	325445	37	257	1061	650	55	30	0	15	520	305	2896	26	35	59	232	549	21	1098	284	1909	1254	2071	47326	17606	0.131	64932
10.5	163.81	7.9	1	0.010269	-0.010571	0.009935	0.07673	84156	1.86	148	1174	0	75	2105	1153	1471	42970	8	5061	898	192	4356	333942	43	253	1156	649	143	0	0	8	602	272	2784	21	63	12	62	533	67	1196	71	1743	1211	2491	48341	17629	0.133	65970
10.6	164.81	7.9	1	0.010269	-0.010571	0.009935	0.07673	89605	1.91	148	1394	0	64	2379	1119	1462	45164	111	5481	986	269	4803	360558	73	288	1282	758	94	0	0	72	515	315	2985	37	81	32	64	582	122	999	154	2290	1291	2088	49108	18279	0.136	67387
10.7	165.81	7.88	1	0.010269	-0.010571	0.009935	0.07673	87922	1.76	148	1315	0	13	2263	1122	1482	45011	15	5408	855	281	4557	348248	168	308	1212	781	170	0	21	99	573	210	2798	154	242	112	271	539	14	1097	324	2266	1294	1605	48890	18453	0.135	67343
10.8	166.81	7.9	1	0.010269	-0.010571	0.009935	0.07673	88078	1.76	133	1328	0	81	2152	1234	1486	45734	0	5356	869	284	4490	351931	155	250	1142	754	94	0	0	0	649	76	2898	139	0	70	192	474	119	1077	615	2064	1416	1825	49389	18231	0.135	67620
10.9	167.81	7.91	1	0.010269	-0.010571	0.009935	0.07673	80762	1.81	164	1183	0	6	1824	1307	1385	41548	53	4751	789	233	4307	322574	263	311	1115	707	79	0	0	76	513	203	2775	14	0	83	140	474	194	917	453	1837	1233	1769	45791	16996	0.13	62787
11	168.81	7.91	1	0.010269	-0.010571	0.009935	0.07673	75596	1.59	147	1127	0	39	1774	1212	1209	39505	133	4319	821	154	3777	291933	312	202	978	524	10	0	0	170	506	0	2690	171	135	38	137	422	42	982	479	1689	1054	1630	45424	16894	0.128	62318
11.1	169.81	7.91	0	0.010269	-0.010571	0.009935	0.07673	76662	1.76	136	1097	0	54	1880	1217	1178	39036	0	4430	724	203	3832	297501	106	350	1103	716	0	0	0	24	430	155	2902	69	47	41	176	513	117	1053	312	1860	1073	1890	45701	16990	0.129	62691
11.2	170.81	7.91	0	0.010269	-0.010571	0.009935	0.07673	77061	1.72	122	1090	0	19	1777	1161	1222	40246	24	4408	825	238	3913	296687	0	264	1018	667	0	0	0	118	602	207	2822	0	25	14	245	469	125	792	162	1865	1033	2309	45581	16820	0.129	62401
11.3	171.81	7.93	0	0.010269	-0.010571	0.009935	0.07673	80052	1.76	94	1164	0	0	1947	1297	1249	42069	0	4642	774	276	3963	307397	209	305	1101	620	72	0	0	56	546	258	2974	121	116	51	110	583	175	1180	408	1844	1129	1771	48845	17792	0.131	66637
11.4	172.81	7.94	0	0.010269	-0.010571	0.009935	0.07673	78501	1.75	178	1069	0	52	2009	1340	1228	40395	48	4451	799	155	3886	300186	145	231	930	539	14	0	0	72	500	120	2849	60	47	38	207	499	0	973	306	1771	1033	1464	47644	17574	0.131	65218
11.5	173.81	7.94	0	0.010269	-0.010571	0.009935	0.07673	74499	1.78	114	1044	0	23	1687	1321	1181	37015	48	4376	759	185	3693	284653	94	245	935	659	30	0	0	22	558	286	2873	95	151	0	223	451	135	857	269	1667	1121	1949	46144	17072	0.128	63216
11.6	174.81	7.94	0	0.010269	-0.010571	0.009935	0.07673	75545	1.66	131	1027	0	31	1711	1313	1214	36560	50	4469	819	234	3832	289256	0	260	899	558	28	0	23	44	484	251	2750	68	15	16	161	493	40	815	219	1683	954	2251	46103	17191	0.129	63294
11.7	175.81	7.94	0	0.010269	-0.010571	0.009935	0.07673	74832	1.73	122	1007	0	12	1720	1329	1128	37379	0	4111	798	228	3774	282809	0	290	973	526	0	0	0	0	530	0	2721	39	97	38	107	376	117	766	336	1770	1056	2104	46546	17257	0.129	63803
11.8	176.81	7.94	0	0.010269	-0.010571	0.009935	0.07673	79871	1.82	131	1073	0	32	1765	1301	1274	39267	0	4688	748	326	4106	311977	143	240	945	599	68	0	0	28	542	235	2857	0	60	23	128	524	67	1168	309	1686	1212	1833	47141	17742	0.132	64883
11.9	177.81	7.94	0	0.010269	-0.010571	0.009935	0.07673	70638	1.54	109	900	0	15	1568	1421	1077	34695	0	3862	712	241	3403	267203	0	209	1231	463	25	0	0	58	480	100	2625	82	184	84	180	495	196	917	278	1938	863	1762	45515	16773	0.127	62288
12	178.81	7.94	0	0.010269	-0.010571	0.009935	0.07673	69139	1.62	123	915	0	45	1642	1352	1120	34588	0	3944	636	213	3482	262605	276	292	943	547	27	0	0	0	563	25	2535	0	12	23	154	455	114	758	284	1430	972	1782	43674	15814	0.125	59488
12.1	179.81	7.94	0	0.010269	-0.010571	0.009935	0.07673	70012	1.69	88	899	0	26	1500	1390	1104	35195	0	4085	760	185	3554	271776	0	265	904	572	111	0	0	0	377	14	2536	207	40	0	69	456	146	871	372	1503	1055	2635	42881	15956	0.124	58837
12.2	180.81	7.94	0	0.010269	-0.010571	0.009935	0.07673	65672	1.63	76	913	0	36	1352	1374	1119	32970	29	3935	708	275	3249	256986	0	233	797	541	0	0	0	0	402	150	2518	52	0	22	174	351	119	727	256	1606	901	2132	40480	14796	0.12	55276
12.3	181.81	7.94	1	0.010269	-0.010571	0.009935	0.07673	63778	1.57	116	938	0	27	1316	1272	976	30981	32	3753	669	193	3268	248841	222	170	902	515	44	0	16	86	371	122	2344	85	191	68	112	375	18	786	293	1457	1020	1403	39940	14866	0.119	54806
12.4	182.81	7.94	1	0.010269	-0.010571	0.009935	0.07673	74085	1.62	166	1037	0	55	1634	1220	1218	36449	28	4212	748	210	3870	289583	133	225	1027	595	109	0	0	4	555	108	2501	164	201	34	183	446	93	767	260	1572	1070	2139	43843	16500	0.127	60343
12.5	183.81	7.94	1	0.010269	-0.010571	0.009935	0.07673	83186	1.66	127	1263	0	12	1949	1172	1373	43222	23	5242	831	298	4387	333568	243	224	1134	644	75	89	0	0	635	113	2794	62	67	35	130	541	101	1066	575	1883	1179	1912	46771	17225	0.131	63996
12.6	184.81	7.95	1	0.010269	-0.010571	0.009935	0.07673	69870	1.68	152	1143	0	36	1528	1148	1147	36748	88	4227	790	170	3704	282310	268	166	1001	558	168	0	0	22	401	267	2344	45	166	23	69	495	0	829	24	1481	1086	1581	39462	15036	0.12	54498
12.7	185.81	7.95	1	0.010269	-0.010571	0.009935	0.07673	42633	1.38	73	751	0	20	920	1108	688	24586	14	2461	368	115	2098	162654	0	118	493	257	0	0	0	0	253	104	1496	0	0	18	69	317	94	358	74	953	671	1323	27281	10461	0.103	37742
12.8	186.81	7.98	1	0.010269	-0.010571	0.009935	0.07673	54856	1.6	119	1039	0	0	1295	949	970	33232	25	3346	546	189	2839	223926	0	156	728	451	117	37	0	87	371	0	1800	23	5	52	89	357	0	615	304	1354	770	1990	30673	11916	0.107	42589
12.9	187.81	8.03	1	0.010269	-0.010571	0.009935	0.07673	70943	1.63	116	1152	0	70	1856	1028	1288	39916	85	4313	762	222	3803	290985	0	225	988	562	177	9	0	27	350	129	2391	0	45	53	104	442	0	779	183	1741	1149	2231	39274	14678	0.119	53952
13	188.81	8.09	1	0.010269	-0.010571	0.009935	0.07673	69660	1.66	158	1090	0	0	1627	1012	1064	36219	0	4139	640	190	3673	275261	177	249	867	568	61	0	0	109	300	94	2527	131	79	105	149	349	11	896	392	1826	984	1490	42228	16163	0.122	58391
13.1	189.81	8.14	1	0.010269	-0.010571	0.009935	0.07673	75810	1.67	131	1083	0	36	1801	1186	1311	37331	0	4396	797	240	3952	299276	0	291	999	658	27	0	0	0	434	246	2668	27	0	50	165	442	175	931	171	1824	1093	2231	45256	16816	0.127	62072
13.2	190.81	8.2	1	0.010269	-0.010571	0.009935	0.07673	72764	1.6	120	1006	0	40	1528	1388	1126	37138	10	3961	723	204	3578	274147	260	296	963	532	0	0	0	0	408	335	2871	133	51	35	140	394	42	1007	86	1528	1003	1769	47083	16924	0.13	64007
13.3	191.81	8.19	1	0.010269	-0.010571	0.009935	0.07673	65665	1.7	117	966	0	38	1354	1403	1067	34563	0	3810	644	277	3191	251044	42	226	871	485	26	0	0	0	392	225	2554	172	123	50	204	341	132	641	51	1560	936	1684	41734	15865	0.123	57599
13.4	192.81	8.18	1	0.010269	-0.010571	0.009935	0.07673	71713	1.62	115	1031	0	29	1576	1331	1209	35496	0	4320	682	174	3653	281775	104	268	971	492	0	0	0	0	454	97	2677	37	0	43	128	330	0	888	324	1497	1161	2098	43752	16329	0.125	60081
13.5	193.81	8.2	1	0.010269	-0.010571	0.009935	0.07673	68012	1.54	139	909	0	44	1498	1391	948	30740	21	3798	791	170	3280	253952	97	242	863	449	0	0	48	0	352	222	2458	148	101	19	201	341	0	748	183	1493	923	1837	45874	16602	0.127	62476
13.6	194.81	8.21	1	0.010269	-0.010571	0.009935	0.07673	72434	1.63	170	885	0	44	1651	1460	1132	33760	0	3967	685	291	3425	269578	645	319	1016	577	122	0	0	0	622	136	2477	77	147	58	137	447	83	879	235	1336	1089	1001	48720	16933	0.13	65653
13.7	195.81	8.22	1	0.010269	-0.010571	0.009935	0.07673	70735	1.56	162	840	0	76	1739	1414	1055	33015	105	3713	710	204	3253	260099	339	326	1006	509	13	0	0	25	616	199	2602	142	27	63	159	300	185	660	223	1326	955	1783	48287	17030	0.131	65317
13.8	196.81	8.23	1	0.010269	-0.010571	0.009935	0.07673	64894	1.55	99	815	0	51	1561	1496	967	30496	118	3445	640	236	3216	241043	23	185	891	525	0	0	0	0	422	51	2509	217	47	50	191	405	144	809	437	1386	932	1996	43475	15702	0.126	59177
13.9	197.81	8.22	1	0.010269	-0.010571	0.009935	0.07673	65912	1.52	127	854	0	37	1443	1420	1048	30603	73	3711	631	186	3374	245627	0	224	1024	520	30	0	0	0	452	87	2704	95	173	19	59	410	141	743	440	1513	912	2186	44772	16328	0.127	61100
14	198.81	8.17	1	0.010269	-0.010571	0.009935	0.07673	66329	1.62	138	942	0	27	1694	1383	1116	32064	12	3910	633	207	3270	252638	0	231	927	555	0	0	0	0	453	191	2357	165	197	49	125	386	36	674	141	1446	956	2012	43055	15552	0.123	58607
14.1	199.81	8.15	1	0.010269	-0.010571	0.009935	0.07673	74197	1.59	150	1227	0	47	1836	1375	1331	36753	0	4457	732	198	3857	291247	103	313	1191	673	101	0	0	0	536	153	2829	186	88	18	104	399	77	925	333	1697	1154	1815	45725	16894	0.128	62619
14.2	200.81	8.15	1	0.010269	-0.010571	0.009935	0.07673	61794	1.54	121	861	0	37	1415	1353	925	29127	29	3478	626	135	3001	228803	0	264	791	429	0	0	0	0	445	69	2444	172	108	15	113	413	135	511	404	1578	793	1788	42600	15167	0.122	57767
14.3	201.81	8.11	1	0.010269	-0.010571	0.009935	0.07673	77720	1.78	135	1193	0	41	2303	1198	1377	39977	0	4863	861	216	4104	313747	38	216	1181	596	171	0	0	0	549	148	2656	44	60	49	95	444	170	888	185	2095	1052	1421	44683	16402	0.127	61085
14.4	202.81	8.1	1	0.010269	-0.010571	0.009935	0.07673	80618	1.73	126	1196	0	42	2187	1189	1436	36844	97	4793	804	303	4000	316615	0	345	1119	700	119	38	0	0	609	118	3021	143	137	85	110	510	248	1034	355	1924	1327	2387	48780	17992	0.132	66772
14.5	203.81	8.07	1	0.010269	-0.010571	0.009935	0.07673	83403	1.82	187	1171	0	92	2828	1104	1594	39397	65	5320	910	258	4427	340618	0	340	1177	664	83	0	0	60	784	192	2469	0	0	0	140	512	104	1127	277	2074	1256	2038	46346	16351	0.131	62697
14.6	204.81	8.11	1	0.010269	-0.010571	0.009935	0.07673	70476	1.78	110	1040	0	39	2079	1288	1188	35129	57	4264	701	229	3648	277781	243	219	1055	610	92	0	0	0	693	95	2782	115	26	54	115	436	154	877	354	1655	1054	1340	42608	15446	0.124	58054
14.7	205.81	8.09	1	0.010269	-0.010571	0.009935	0.07673	69219	1.64	94	1092	0	30	1598	1236	1388	35631	0	4150	787	194	3683	279761	313	241	973	610	111	0	0	0	579	59	2718	110	44	52	63	434	57	767	487	1740	1063	1434	40242	15272	0.121	55514
14.8	206.81	8.12	1	0.010269	-0.010571	0.009935	0.07673	66705	1.6	132	1096	0	40	1628	1249	1116	33497	27	3959	689	219	3498	264885	86	223	1000	604	29	0	0	0	338	250	2402	74	126	68	102	414	28	820	88	1523	1068	1962	40621	15238	0.121	55859
14.9	207.81	8.1	1	0.010269	-0.010571	0.009935	0.07673	66274	1.67	116	1073	0	56	1719	1222	1316	33860	0	4221	688	181	3368	267694	0	185	953	587	47	0	0	81	372	205	2466	178	91	83	150	398	0	811	251	1519	1030	2330	38817	14742	0.119	53559
15	208.81	8.13	1	0.010269	-0.010571	0.009935	0.07673	62068	1.6	117	997	0	51	1708	1273	1109	32195	32	3856	673	162	3154	249312	0	218	897	575	85	0	0	144	382	153	2142	71	28	32	104	422	37	854	191	1407	887	1992	36334	14036	0.116	50370
15.1	209.81	8.15	1	0.010269	-0.010571	0.009935	0.07673	59774	1.58	101	1022	0	34	1361	1259	1129	32489	0	3657	579	84	3076	232576	0	208	773	468	0	0	0	20	475	156	2348	151	0	0	72	325	75	495	82	1383	808	1851	36718	14310	0.115	51028
15.2	210.81	8.17	1	0.010269	-0.010571	0.009935	0.07673	68259	1.61	105	1038	0	46	1686	1254	1182	34288	24	3964	734	229	3560	271615	0	255	926	538	0	0	0	0	469	198	2467	42	23	69	117	239	0	783	143	1560	983	2140	40679	15492	0.121	56171
15.3	211.81	8.19	1	0.010269	-0.010571	0.009935	0.07673	69202	1.68	127	1017	0	81	1673	1282	1233	33656	27	4059	642	216	3378	269089	0	151	985	573	103	0	0	23	519	227	2514	149	153	54	100	382	66	920	329	1707	931	2249	42750	16172	0.124	58922
15.4	212.81	8.19	1	0.010269	-0.010571	0.009935	0.07673	74091	1.64	112	1115	0	53	1929	1295	1241	35876	0	4480	783	211	3817	289458	0	242	1038	596	20	0	0	25	548	200	2717	204	177	36	150	421	181	993	220	1769	1093	2153	46098	16958	0.127	63056
15.5	213.81	8.22	1	0.010269	-0.010571	0.009935	0.07673	71481	1.69	135	1047	0	43	2088	1346	1183	33994	22	4103	764	175	3611	279039	186	230	1032	533	77	0	0	0	455	103	2529	111	53	66	40	400	132	819	381	1622	1083	1735	44981	16150	0.126	61131
15.6	214.81	8.24	1	0.010269	-0.010571	0.009935	0.07673	67047	1.71	113	1012	0	52	1556	1459	1147	31517	11	3907	606	233	3384	260220	18	285	1011	602	39	0	0	0	481	136	2541	193	10	102	113	465	46	601	349	1382	987	1905	43517	15566	0.123	59083
15.7	215.81	8.23	1	0.010269	-0.010571	0.009935	0.07673	63319	1.45	129	900	0	48	1593	1444	1011	32785	72	3666	644	165	3081	240954	60	204	869	500	58	0	0	92	566	136	2505	125	100	42	150	313	123	771	333	1300	878	1997	41251	15342	0.121	56593
15.8	216.81	8.21	1	0.010269	-0.010571	0.009935	0.07673	68177	1.62	131	964	0	27	1624	1404	1210	34582	49	4105	656	216	3376	266131	0	271	1028	636	78	0	0	37	478	76	2558	184	0	5	94	331	108	893	230	1744	864	2109	42658	15493	0.123	58151
15.9	217.81	8.21	1	0.010269	-0.010571	0.009935	0.07673	63379	1.56	162	862	0	95	1487	1450	1035	32293	10	3729	669	224	3226	249003	249	143	893	564	13	0	0	0	420	124	2427	151	107	70	136	377	29	851	313	1271	1053	1359	39701	15026	0.119	54727
16	218.81	8.21	1	0.010269	-0.010571	0.009935	0.07673	64434	1.55	128	947	0	36	1448	1408	1047	31787	0	3806	667	146	3320	254361	0	253	948	517	53	30	0	0	417	231	2313	66	99	75	115	369	20	816	73	1469	853	2171	39316	15161	0.119	54477
16.1	219.81	8.21	1	0.010269	-0.010571	0.009935	0.07673	55173	1.45	72	907	0	57	1377	1323	962	27465	52	3428	568	114	2758	218213	117	173	820	473	6	0	0	0	326	187	2088	77	118	85	23	383	78	537	59	1396	849	1192	34824	13438	0.112	48262
16.2	220.81	8.19	1	0.010269	-0.010571	0.009935	0.07673	65687	1.6	123	1045	0	57	1618	1250	1156	32049	0	4071	683	219	3438	262765	0	180	906	526	12	30	0	51	483	244	2484	71	52	52	125	288	130	797	286	1459	923	2233	39708	14966	0.119	54674
16.3	221.81	8.21	1	0.010269	-0.010571	0.009935	0.07673	60406	1.51	118	929	7	65	1330	1335	1075	29981	61	3707	622	184	3167	240282	45	199	848	424	108	0	0	0	367	118	2258	33	34	96	13	367	123	661	237	1477	842	1552	37578	14391	0.116	51969
16.4	222.81	8.22	1	0.010269	-0.010571	0.009935	0.07673	72066	1.7	153	1195	0	64	1848	1219	1299	41054	107	4472	771	249	3637	281632	0	225	993	553	94	18	0	0	440	92	2893	276	164	47	123	408	154	790	467	1849	1002	1675	43022	16320	0.125	59342
16.5	223.81	8.23	1	0.010269	-0.010571	0.009935	0.07673	70725	1.72	102	1058	0	57	1916	1296	1194	35753	0	4185	765	248	3689	280349	166	221	1077	529	41	0	0	15	426	244	2714	84	0	17	108	391	0	1091	167	1661	985	1456	42960	15883	0.122	58843
16.6	224.81	8.25	1	0.010269	-0.010571	0.009935	0.07673	64506	1.59	136	952	0	50	1617	1365	1097	32065	70	3880	629	213	3222	252802	359	266	909	467	21	0	0	0	419	98	2454	122	256	40	167	417	113	790	430	1191	975	1761	40332	14860	0.12	55192
16.7	225.81	8.29	1	0.010269	-0.010571	0.009935	0.07673	69801	1.65	103	1044	0	38	1905	1374	1146	34031	18	3848	716	225	3394	262527	250	245	881	446	6	0	0	53	613	223	2662	51	148	32	177	562	174	718	226	1581	1112	1726	46252	16671	0.127	62923
16.8	226.81	8.29	1	0.010269	-0.010571	0.009935	0.07673	75448	1.83	125	1070	0	81	2215	1388	1317	37085	14	4359	856	276	3849	298035	313	260	1169	560	16	0	0	0	610	40	2682	177	6	174	73	367	79	1019	453	1640	1152	1531	45492	16510	0.127	62002
16.9	227.81	8.27	1	0.010269	-0.010571	0.009935	0.07673	63357	1.61	85	1002	0	48	1581	1346	1037	31945	0	3793	704	239	3236	249094	44	229	867	575	46	0	0	0	433	168	2600	211	0	53	103	382	237	571	272	1354	1035	1994	39557	15046	0.119	54603
17	228.81	8.29	1	0.010269	-0.010571	0.009935	0.07673	60876	1.59	104	1014	0	11	1590	1326	1104	30866	43	3898	744	105	3166	247745	137	177	949	516	120	0	0	0	384	155	1989	0	110	47	114	432	41	659	0	1335	881	1787	35486	13754	0.113	49240
17.1	229.81	8.28	1	0.010269	-0.010571	0.009935	0.07673	65292	1.62	129	1015	0	58	1799	1261	1213	31996	0	4186	588	190	3426	266232	37	186	1032	514	85	0	0	0	378	139	2256	0	0	122	0	464	0	669	330	1388	1117	1870	37072	14413	0.117	51485
17.2	230.81	8.29	1	0.010269	-0.010571	0.009935	0.07673	72497	1.74	140	1159	0	58	2067	1241	1335	37104	50	4660	739	272	3735	298614	56	194	1033	646	137	0	0	11	382	341	2497	299	112	52	118	363	117	920	310	1684	1093	1992	40221	15484	0.121	55705
17.3	231.81	8.28	1	0.010269	-0.010571	0.009935	0.07673	81194	1.88	157	1408	0	69	2356	1253	1445	43259	78	5326	867	245	4278	337316	0	255	1198	801	119	22	0	0	437	162	2724	92	54	47	162	511	214	1121	510	2055	1251	2396	42714	16535	0.127	59249
17.4	232.81	8.28	1	0.010269	-0.010571	0.009935	0.07673	77308	1.6	157	1269	0	35	1867	1186	1368	42929	34	4671	816	261	4066	312692	367	208	1111	728	69	0	0	67	547	174	2841	109	0	175	184	504	6	1004	208	1647	1238	1670	42239	16457	0.126	58696
17.5	233.81	8.24	1	0.010269	-0.010571	0.009935	0.07673	82442	1.87	181	1478	0	64	2076	1091	1509	45086	58	5175	942	246	4355	335189	0	241	1086	700	61	0	0	0	420	89	2997	41	84	0	185	463	123	1035	335	2194	1209	2392	44605	17164	0.13	61769
17.6	234.81	8.27	1	0.010269	-0.010571	0.009935	0.07673	84757	1.94	194	1492	0	87	2145	1151	1599	46286	10	5351	924	230	4579	346682	297	291	1195	752	181	0	0	29	455	403	2929	164	139	61	8	445	129	1204	314	1855	1153	2145	45261	17213	0.13	62474
17.7	235.81	8.25	1	0.010269	-0.010571	0.009935	0.07673	79857	1.87	117	1360	0	60	2363	1173	1478	41945	0	5088	865	236	4330	323348	0	239	1058	617	148	0	0	117	531	159	2888	146	251	103	217	520	178	1102	480	1991	1237	2295	43713	16857	0.128	60570
17.8	236.81	8.26	1	0.010269	-0.010571	0.009935	0.07673	85252	1.88	162	1401	0	78	2763	1294	1522	46171	40	5330	874	341	4374	347254	114	271	1314	749	115	0	0	0	591	160	2958	87	139	88	160	503	170	1198	332	2246	1329	2109	45631	17446	0.131	63077
17.9	237.81	8.28	1	0.010269	-0.010571	0.009935	0.07673	76569	1.74	137	1200	0	24	1955	1381	1352	37454	105	4749	884	202	3956	309668	0	196	1027	644	114	0	0	0	487	167	2842	211	75	54	86	503	96	1079	433	1740	1012	2436	43304	16431	0.127	59735
18	238.81	8.21	1	0.010269	-0.010571	0.009935	0.07673	87768	1.85	143	1427	0	46	2515	1116	1518	45086	30	5407	955	233	4777	361611	161	278	1246	812	119	0	0	0	519	360	2877	255	18	113	239	527	86	1172	128	2048	1287	1982	46283	17467	0.133	63750
18.1	239.81	8.19	1	0.010269	-0.010571	0.009935	0.07673	92027	1.85	163	1689	0	88	2580	1189	1716	51348	106	5878	974	389	4968	380751	0	245	1252	808	22	0	0	111	516	374	3063	106	102	61	194	507	144	1454	287	2424	1381	2532	47547	18468	0.135	66015
18.2	240.81	8.16	1	0.010269	-0.010571	0.009935	0.07673	78702	1.72	187	1395	0	48	1896	1236	1432	42432	105	5043	893	254	4214	321955	53	298	1068	660	105	0	0	42	515	244	2824	242	51	44	144	544	21	1272	308	1889	1295	1877	43653	16603	0.127	60256
18.3	241.81	8.15	1	0.010269	-0.010571	0.009935	0.07673	84142	1.98	156	1352	0	53	2262	1171	1419	45043	53	5033	816	241	4561	337495	0	302	1168	681	121	0	0	0	534	0	2940	109	143	107	61	412	204	1031	556	1982	1215	2359	46623	17774	0.133	64397
18.4	242.81	8.15	1	0.010269	-0.010571	0.009935	0.07673	79039	1.83	190	1427	0	44	2095	1185	1438	44855	0	5125	870	130	4272	320352	0	186	1144	559	106	0	0	0	453	183	2545	0	74	0	123	487	98	855	244	1883	1200	2089	43662	16225	0.127	59887
18.5	243.81	8.17	1	0.010269	-0.010571	0.009935	0.07673	79497	1.81	92	1195	0	56	2386	1175	1439	40598	0	4842	823	260	4421	327404	0	233	1148	692	103	0	0	0	529	204	2689	129	237	43	47	491	78	1088	282	2125	1204	2173	43132	16570	0.127	59702
18.6	244.81	8.19	1	0.010269	-0.010571	0.009935	0.07673	76671	1.78	143	1273	0	40	2067	1269	1363	44477	23	4764	844	236	4051	311202	0	212	1033	643	6	0	0	78	453	128	2641	255	190	85	128	414	83	1035	314	1760	1120	2222	42633	16306	0.125	58939
18.7	245.81	8.17	1	0.010269	-0.010571	0.009935	0.07673	73423	1.68	138	1147	0	40	1819	1289	1191	60997	0	4129	768	204	3620	279642	102	281	1026	666	101	0	0	8	512	268	2783	28	0	88	128	474	118	892	48	1555	1115	2039	42672	16154	0.124	58826
18.8	246.81	8.15	1	0.010269	-0.010571	0.009935	0.07673	84445	1.92	158	1432	0	52	2371	1216	1554	44707	16	5395	951	204	4591	348009	63	248	1167	766	117	0	0	51	634	72	2794	141	125	21	155	573	190	1199	493	1985	1328	2305	44299	16857	0.129	61156
18.9	247.81	8.17	1	0.010269	-0.010571	0.009935	0.07673	76237	1.77	139	1319	0	57	2068	1264	1423	39813	23	4838	802	295	3926	309713	67	247	1136	614	32	32	0	0	422	195	2651	24	85	70	73	401	146	967	203	1870	1202	1924	42786	16217	0.125	59003
19	248.81	8.18	1	0.010269	-0.010571	0.009935	0.07673	79235	1.78	140	1421	0	53	2058	1237	1415	45689	99	4945	706	265	4247	320069	0	197	1204	665	114	0	0	0	329	313	2907	106	149	38	60	384	73	982	192	1854	1217	2591	43304	16456	0.127	59760
19.1	249.81	8.19	1	0.010269	-0.010571	0.009935	0.07673	74536	1.68	145	1164	0	59	1980	1267	1247	38287	67	4417	775	220	3850	296819	197	277	1132	741	202	0	0	0	386	350	2648	158	37	70	174	444	125	881	112	1700	1125	1964	43056	16544	0.126	59600
19.2	250.81	8.17	1	0.010269	-0.010571	0.009935	0.07673	78145	1.73	124	1244	0	38	1978	1223	1402	40039	68	4969	822	225	4133	319217	141	196	1121	594	94	0	0	91	463	234	2709	81	0	50	68	439	29	1170	286	1838	1269	1826	42944	16476	0.127	59420
19.3	251.81	8.15	1	0.010269	-0.010571	0.009935	0.07673	79259	1.71	98	1178	0	40	2179	1213	1335	39137	7	4794	795	206	4098	322005	133	270	1093	607	57	0	0	0	593	269	2781	95	65	19	97	495	35	1012	342	1913	1072	1651	44711	16755	0.128	61466
19.4	252.81	8.16	1	0.010269	-0.010571	0.009935	0.07673	81604	1.75	136	1274	0	66	2293	1236	1473	42118	43	5298	958	183	4283	329879	118	239	1241	637	133	0	0	25	633	346	2811	0	0	14	184	468	232	824	164	1930	1075	1739	45684	16697	0.129	62381
19.5	253.81	8.16	1	0.010269	-0.010571	0.009935	0.07673	69310	1.57	91	1138	0	69	1949	1262	1235	35401	21	4261	796	235	3674	281101	190	187	986	606	117	0	0	48	478	66	2211	54	156	52	240	565	88	990	339	1710	1108	1640	38865	14960	0.12	53825
19.6	254.81	8.15	1	0.010269	-0.010571	0.009935	0.07673	83934	1.83	167	1432	0	45	2319	1171	1515	45238	6	5233	976	351	4510	345594	103	238	1164	669	138	0	0	134	402	197	2799	110	19	89	97	484	51	1149	276	2224	1294	1911	45420	17150	0.129	62570
19.7	255.81	8.15	1	0.010269	-0.010571	0.009935	0.07673	76684	1.84	120	1372	0	49	1863	1078	1399	39716	56	5065	810	239	4208	320182	0	265	1013	609	0	0	0	26	337	144	2490	104	336	33	161	416	182	905	156	1945	1266	1817	40556	16416	0.123	56972
19.8	256.81	8.16	1	0.010269	-0.010571	0.009935	0.07673	87243	1.91	141	1357	0	75	2568	1076	1654	44556	22	5465	983	268	4714	363527	0	276	1315	819	166	20	0	9	606	223	3043	228	158	129	76	503	87	1124	360	2150	1486	2814	45405	17455	0.132	62860
19.9	257.81	8.17	1	0.010269	-0.010571	0.009935	0.07673	79635	1.77	142	1361	0	73	2177	1150	1428	42423	30	5126	915	304	4317	328403	70	248	1189	695	168	0	56	96	501	318	2772	77	112	0	96	490	0	1223	176	1883	1205	1976	42638	16490	0.127	59128
20	258.81	8.14	1	0.010269	-0.010571	0.009935	0.07673	72833	1.7	150	1212	0	72	2153	1142	1299	39399	53	4638	817	206	3788	297250	0	203	1024	517	84	0	0	25	399	173	2564	0	0	66	80	406	142	833	353	1720	1028	2161	40580	15788	0.121	56368
20.1	259.81	8.16	1	0.010269	-0.010571	0.009935	0.07673	81767	1.86	159	1415	0	29	2512	1187	1517	44602	66	5163	885	251	4439	338657	0	217	1217	718	65	0	0	115	560	303	2877	66	0	71	163	512	37	1158	230	2091	1278	2054	42566	16758	0.127	59324
20.2	260.81	8.18	1	0.010269	-0.010571	0.009935	0.07673	71551	1.75	92	1157	0	45	2025	1176	1204	36935	7	4417	737	199	3810	287650	0	247	936	559	0	0	0	20	507	154	2619	109	0	54	121	359	0	974	324	1773	979	2398	41369	15654	0.123	57023
20.3	261.81	8.19	1	0.010269	-0.010571	0.009935	0.07673	77657	1.65	151	1238	0	78	2565	1207	1334	38407	0	4879	871	240	4218	321084	0	336	1196	703	111	0	60	108	541	268	2756	189	44	88	128	441	0	1052	347	2027	1168	2070	41098	16369	0.125	57467
20.4	262.81	8.2	1	0.010269	-0.010571	0.009935	0.07673	74542	1.75	137	1134	0	67	2278	1306	1275	37471	19	4576	843	298	3815	304089	146	254	1024	740	109	0	0	0	533	59	2589	111	62	71	161	405	275	865	567	1690	1211	2029	42323	16285	0.124	58608
20.5	263.81	8.19	1	0.010269	-0.010571	0.009935	0.07673	67360	1.73	116	990	0	52	1772	1311	1128	35240	16	4060	694	177	3329	260326	52	203	860	581	131	0	0	105	569	222	2686	80	198	9	186	429	93	819	269	1646	970	1504	41399	15811	0.122	57210
20.6	264.81	8.19	1	0.010269	-0.010571	0.009935	0.07673	76188	1.72	140	1180	0	66	2433	1306	1272	39789	0	4594	811	200	4011	305776	0	266	1135	633	23	45	0	108	568	273	2953	71	149	60	75	419	226	939	296	1712	1125	2348	43130	16301	0.125	59431
20.7	265.81	8.21	1	0.010269	-0.010571	0.009935	0.07673	67752	1.61	127	1008	0	19	1703	1381	1149	32909	70	3943	613	168	3469	263188	92	208	905	543	0	0	0	0	547	284	2681	197	74	91	156	281	128	942	198	1524	960	1820	42505	16371	0.123	58876
20.8	266.81	8.2	1	0.010269	-0.010571	0.009935	0.07673	72155	1.64	148	1033	0	54	2314	1344	1267	35863	78	4263	796	173	3673	285495	229	242	1082	550	84	0	0	123	648	0	2729	214	162	34	107	441	82	900	456	1677	1062	2074	42354	15689	0.124	58043
20.9	267.81	8.14	1	0.010269	-0.010571	0.009935	0.07673	78078	1.83	105	1240	0	48	2315	1198	1407	40745	5	4982	888	219	4254	323928	64	200	1136	742	142	0	0	32	566	151	2568	84	197	31	115	536	277	1004	315	1901	1140	2263	42077	15841	0.125	57918
21	268.81	8.13	1	0.010269	-0.010571	0.009935	0.07673	62656	1.64	136	1075	13	36	1769	1117	1083	35346	0	4029	660	243	3338	252518	0	185	806	556	30	0	0	58	491	124	2231	93	177	0	117	455	62	635	320	1609	866	1923	36043	14123	0.115	50166
21.1	269.81	8.19	1	0.010269	-0.010571	0.009935	0.07673	76306	1.7	198	1258	0	56	2094	1287	1379	40873	0	4868	904	191	4001	309205	383	223	1081	664	134	0	0	7	384	256	2877	108	232	39	160	398	157	930	279	1669	1133	1685	43363	16674	0.125	60037
21.2	270.81	8.19	1	0.010269	-0.010571	0.009935	0.07673	67535	1.72	87	1101	0	65	1872	1291	1216	36254	0	4160	771	101	3473	274018	222	254	1086	486	96	0	0	0	491	70	2471	58	73	45	107	528	161	641	313	1622	1086	1653	38550	14940	0.119	53490
21.3	271.81	8.17	1	0.010269	-0.010571	0.009935	0.07673	59240	1.63	141	967	0	66	1879	1169	1029	30777	0	3724	598	159	3071	237540	0	233	827	555	22	0	0	9	402	250	2171	84	0	14	173	361	0	662	56	1284	875	1654	35139	13768	0.113	48907
21.4	272.81	8.15	1	0.010269	-0.010571	0.009935	0.07673	87817	1.83	122	1403	0	70	2921	1153	1481	46748	80	5436	992	268	4590	360990	0	242	1195	749	203	0	0	83	619	201	2934	76	0	50	93	531	16	1189	333	2416	1251	2325	46051	17878	0.133	63929
21.5	273.81	8.19	1	0.010269	-0.010571	0.009935	0.07673	83893	1.91	162	1504	0	36	2612	1216	1535	44997	59	5184	820	258	4472	345440	94	239	1133	703	16	0	0	18	600	350	2861	5	55	64	284	479	39	1313	99	2185	1139	1610	44500	17234	0.13	61734
21.6	274.81	8.2	1	0.010269	-0.010571	0.009935	0.07673	76387	1.75	109	1214	0	42	2178	1325	1332	39491	37	4812	882	216	4079	307756	0	263	1130	601	82	0	0	93	482	331	2768	186	157	47	111	433	173	892	175	1863	1170	2323	44266	16769	0.126	61035
21.7	275.81	8.21	1	0.010269	-0.010571	0.009935	0.07673	76399	1.73	142	1063	0	56	2225	1346	1288	37860	0	4855	755	193	3963	301458	7	253	1119	560	12	0	0	0	590	324	3134	241	0	48	174	380	175	934	166	1852	1091	1981	45713	16847	0.128	62560
21.8	276.81	8.2	1	0.010269	-0.010571	0.009935	0.07673	64746	1.6	106	996	0	66	1709	1387	1110	32802	86	3850	682	228	3328	252828	22	281	922	509	46	0	0	0	428	178	2550	80	81	28	69	340	83	743	251	1458	999	1971	40497	15604	0.121	56101
21.9	277.81	8.16	1	0.010269	-0.010571	0.009935	0.07673	78376	1.77	157	1329	0	96	2441	1298	1503	45787	124	4813	819	216	4090	316356	253	304	1193	762	101	0	12	0	526	140	2921	112	0	90	139	509	0	988	321	1652	1219	2408	43649	16864	0.127	60513
22	278.81	8.17	1	0.010269	-0.010571	0.009935	0.07673	71388	1.55	150	1151	0	46	1875	1288	1287	34737	17	4313	757	160	3700	286075	137	206	1080	532	34	0	0	0	363	134	2622	182	0	96	9	462	0	946	332	1617	1066	1923	42288	16428	0.124	58716
22.1	279.81	8.13	1	0.010269	-0.010571	0.009935	0.07673	76757	1.69	157	1210	0	66	2222	1207	1331	41453	7	4854	809	119	3982	315145	158	228	1061	617	110	0	0	141	573	138	2704	137	23	76	133	490	241	967	483	1832	1181	1750	41891	16049	0.124	57940
22.2	280.81	8.12	1	0.010269	-0.010571	0.009935	0.07673	70419	1.68	132	1153	0	35	1913	1240	1263	36249	49	4411	783	180	3740	288942	35	142	995	629	38	0	0	0	456	181	2390	207	146	36	130	469	144	929	239	1840	1039	1759	40131	15364	0.12	55495
22.3	281.81	8.11	1	0.010269	-0.010571	0.009935	0.07673	69965	1.72	129	1219	0	49	2057	1134	1268	37787	0	4477	713	205	3759	289164	0	171	1046	597	81	0	0	50	431	163	2349	108	96	111	123	378	49	658	214	1682	1076	2015	38701	15243	0.119	53944
22.4	282.81	8.11	1	0.010269	-0.010571	0.009935	0.07673	82850	1.97	125	1444	0	57	2445	1099	1502	44165	23	5322	947	246	4438	343683	536	213	1174	750	132	0	0	0	551	216	2793	88	75	63	199	466	120	1263	366	1986	1276	1481	44305	16587	0.128	60892
22.5	283.81	8.12	1	0.010269	-0.010571	0.009935	0.07673	81345	1.77	173	1531	0	53	2264	1221	1434	44834	27	5364	858	143	4502	340615	0	188	1076	703	30	0	0	0	509	277	2670	0	104	106	162	371	73	1162	219	1985	1205	2714	42052	16137	0.126	58189
22.6	284.81	8.11	1	0.010269	-0.010571	0.009935	0.07673	66612	1.58	109	1140	0	59	1749	1090	1214	33800	0	4303	696	212	3504	267865	12	219	948	561	0	0	0	0	568	37	2555	69	256	92	131	432	134	688	423	1519	983	1973	38518	15134	0.119	53652
22.7	285.81	8.11	1	0.010269	-0.010571	0.009935	0.07673	80299	1.73	177	1418	0	24	2154	1144	1516	43454	5	5108	868	185	4378	333792	194	221	1268	735	109	0	0	63	489	270	2726	102	48	66	130	524	74	994	158	1996	1276	1634	41349	16202	0.126	57551
22.8	286.81	8.17	1	0.010269	-0.010571	0.009935	0.07673	69317	1.65	149	1142	0	48	1806	1263	1152	35926	0	4248	761	204	3734	278643	74	233	947	624	37	0	0	0	549	138	2613	29	19	62	208	468	56	748	282	1601	1119	2025	40405	15650	0.12	56055
22.9	287.81	8.21	1	0.010269	-0.010571	0.009935	0.07673	63606	1.58	121	1002	0	49	1385	1324	1045	31768	0	3828	597	168	3164	249533	0	203	923	550	5	0	0	0	432	213	2398	148	182	56	119	388	70	604	267	1399	876	2152	38926	15187	0.119	54113
23	288.81	8.23	1	0.010269	-0.010571	0.009935	0.07673	67104	1.55	130	1012	0	38	1888	1286	1089	33987	86	3826	656	92	3247	253507	122	212	830	586	0	0	0	0	576	37	2653	121	0	84	171	340	162	819	468	1502	891	1611	43746	16509	0.125	60255
23.1	289.81	8.23	1	0.010269	-0.010571	0.009935	0.07673	82119	1.66	167	1294	0	86	2284	1225	1402	43506	7	4875	858	206	4253	327073	0	272	1313	634	170	0	0	7	574	399	3044	147	126	47	52	485	56	1109	145	1896	1165	2579	47134	17523	0.132	64657
23.2	290.81	8.23	1	0.010269	-0.010571	0.009935	0.07673	64875	1.62	131	1018	0	55	1558	1368	1180	32604	6	3676	646	194	3240	246150	64	305	1096	572	157	0	0	49	434	312	2535	120	156	51	40	400	86	550	89	1500	840	1765	41770	15525	0.122	57295
23.3	291.81	8.22	1	0.010269	-0.010571	0.009935	0.07673	72139	1.63	119	1116	0	31	1674	1289	1242	35560	0	4220	769	225	3629	281192	127	202	1059	535	57	0	0	16	444	344	2537	244	159	65	168	401	135	811	156	1801	1092	1785	44382	16693	0.126	61075
23.4	292.81	8.21	1	0.010269	-0.010571	0.009935	0.07673	64077	1.42	141	996	0	75	1511	1296	1189	32104	74	3838	688	182	3499	251699	269	197	974	661	43	0	0	0	560	139	2543	170	198	38	64	406	193	661	291	1218	968	1559	39113	14987	0.12	54100
23.5	293.81	8.21	1	0.010269	-0.010571	0.009935	0.07673	71931	1.66	178	1125	0	77	2163	1357	1214	38183	12	4298	806	190	3773	288651	0	210	995	766	28	0	0	14	507	210	2591	308	117	50	0	519	66	1083	536	1681	1056	2387	41631	15780	0.123	57411
23.6	294.81	8.22	1	0.010269	-0.010571	0.009935	0.07673	71210	1.71	111	1107	0	30	1953	1277	1305	37467	24	4383	694	269	3749	288610	256	262	1060	602	52	0	0	0	493	517	2685	100	55	78	159	456	119	932	0	1458	1071	1999	41019	15723	0.122	56742
23.7	295.81	8.22	1	0.010269	-0.010571	0.009935	0.07673	63984	1.55	79	1062	0	57	1896	1279	1172	34149	0	3993	794	215	3325	252774	47	183	792	467	79	0	0	0	468	126	2314	67	130	0	144	376	104	656	132	1259	1036	1858	38957	14453	0.118	53410
23.8	296.81	8.23	1	0.010269	-0.010571	0.009935	0.07673	72736	1.68	153	1183	0	90	2468	1273	1248	39433	61	4229	814	275	3800	289485	182	229	1096	668	44	0	0	14	567	87	2644	67	142	71	86	449	11	877	362	1549	1125	1655	42396	16044	0.123	58440
23.9	297.81	8.23	1	0.010269	-0.010571	0.009935	0.07673	78537	1.76	137	1364	0	73	2522	1209	1469	41992	0	5032	848	229	4256	324401	0	211	1160	701	81	0	0	0	573	232	2806	131	7	96	181	427	0	1145	265	1918	1121	2512	41854	16230	0.126	58084
24	298.81	8.17	1	0.010269	-0.010571	0.009935	0.07673	72422	1.65	124	1331	0	64	2091	1054	1324	41531	18	4360	827	273	3668	288553	199	256	1074	615	112	118	0	0	507	16	2846	55	20	142	206	370	51	844	285	1605	1057	1904	41569	16093	0.123	57662
24.1	299.81	8.18	1	0.010269	-0.010571	0.009935	0.07673	78230	1.73	153	1345	0	62	2531	1122	1475	40407	33	4933	808	243	3997	312787	206	228	1121	602	58	0	0	35	582	38	2827	39	37	43	127	364	14	1182	642	1787	1339	1778	45026	17154	0.128	62180
24.2	300.81	8.18	1	0.010269	-0.010571	0.009935	0.07673	85622	1.89	192	1624	0	71	2609	1021	1643	48154	96	5647	992	260	4678	354712	61	286	1283	861	124	0	7	47	666	191	2841	98	0	30	139	488	12	1294	316	2023	1274	2368	43568	16892	0.13	60460
24.3	301.81	8.15	1	0.010269	-0.010571	0.009935	0.07673	82417	1.82	174	1549	0	53	2577	955	1668	44881	0	5376	938	218	4358	336911	185	276	1186	665	65	0	0	13	647	139	2692	35	11	96	197	504	32	1209	334	1944	1221	2044	43790	16878	0.129	60668
24.4	302.81	8.15	1	0.010269	-0.010571	0.009935	0.07673	84107	1.79	181	1500	0	79	2866	1023	1545	46991	24	5695	877	262	4616	351980	18	294	1186	666	149	0	0	0	627	0	2918	244	99	74	185	539	14	1181	645	2082	1305	2150	42850	16765	0.128	59615
24.5	303.81	8.17	1	0.010269	-0.010571	0.009935	0.07673	90586	2.1	253	1916	0	68	2689	1130	1803	50554	69	6212	1037	335	4976	388141	0	239	1271	838	72	6	0	113	529	247	2978	118	25	89	212	495	98	1360	259	2373	1330	2689	43987	17220	0.132	61207
24.6	304.81	8.21	1	0.010269	-0.010571	0.009935	0.07673	70179	1.63	130	1249	0	59	1957	1141	1285	36777	11	4418	698	272	3607	282877	291	186	1018	594	133	0	0	27	482	180	2723	167	31	69	62	500	48	952	442	1481	1036	1401	40563	15622	0.122	56185
24.7	305.81	8.21	1	0.010269	-0.010571	0.009935	0.07673	79264	1.76	143	1345	0	53	2357	1152	1951	40919	37	5081	779	218	4271	326083	118	252	1143	748	97	0	0	99	680	233	3208	110	253	79	97	476	43	1154	377	1916	1178	1883	42255	16478	0.126	58733
24.8	306.81	8.23	1	0.010269	-0.010571	0.009935	0.07673	71924	1.76	145	1260	0	67	2265	1250	1482	38875	8	4428	722	259	3676	286973	12	248	954	600	87	0	0	72	477	252	2775	175	0	33	128	401	117	810	234	1731	1042	2046	41585	15747	0.123	57332
24.9	307.81	8.21	1	0.010269	-0.010571	0.009935	0.07673	83236	1.88	128	1346	0	118	2981	1265	1497	45306	37	5229	884	321	4415	340874	157	235	1232	717	55	19	0	31	529	184	2911	136	160	89	199	483	82	1067	537	2082	1258	1665	44715	17188	0.129	61903
25	308.81	8.21	1	0.010269	-0.010571	0.009935	0.07673	71630	1.69	137	1099	0	0	2171	1246	1062	36809	0	4134	736	267	3772	286076	155	236	977	546	0	0	0	53	492	129	2601	166	54	96	153	399	64	628	340	1777	1015	1800	41386	15716	0.123	57102
25.1	309.81	8.25	1	0.010269	-0.010571	0.009935	0.07673	68966	1.59	133	1060	0	73	2501	1377	1248	34033	84	4124	801	161	3534	274892	0	158	975	529	0	0	0	0	494	148	2611	43	144	105	94	423	59	732	418	1638	995	2518	41011	15813	0.122	56824
25.2	310.81	8.26	1	0.010269	-0.010571	0.009935	0.07673	57509	1.51	75	854	0	42	1810	1456	959	28093	29	3286	568	114	2892	224085	258	212	888	440	98	0	0	0	449	108	2106	218	232	87	28	362	0	552	355	1148	861	1349	37156	14289	0.115	51445
25.3	311.81	8.25	1	0.010269	-0.010571	0.009935	0.07673	66893	1.63	108	1006	0	36	1873	1355	1097	33467	22	4180	702	216	3427	266673	0	217	898	543	29	0	0	125	582	229	2360	178	0	54	173	348	120	717	97	1761	964	1900	40588	15231	0.12	55819
25.4	312.81	8.2	1	0.010269	-0.010571	0.009935	0.07673	68672	1.71	90	1166	0	51	1836	1192	1215	34923	15	4213	716	187	3774	283460	0	190	987	560	16	0	0	49	555	238	2346	75	15	40	224	347	86	641	112	1789	1006	1940	38421	14512	0.119	52933
25.5	313.81	8.22	1	0.010269	-0.010571	0.009935	0.07673	65716	1.63	140	1105	0	80	1863	1223	1125	37045	58	4140	714	309	3430	263407	161	215	999	606	108	0	0	59	448	33	2444	34	152	4	95	440	24	698	334	1392	858	1683	37926	14986	0.117	52912
25.6	314.81	8.23	1	0.010269	-0.010571	0.009935	0.07673	74343	1.68	125	1291	0	34	2180	1112	1272	39885	21	4382	780	197	3754	298065	0	202	1001	574	101	23	0	15	624	214	2887	230	0	74	136	432	201	910	228	1689	1067	2511	42093	16867	0.125	58960
25.7	315.81	8.26	1	0.010269	-0.010571	0.009935	0.07673	76785	1.6	139	1303	0	51	2378	1194	1320	40290	0	4683	820	249	3985	310095	0	235	1150	700	110	0	0	148	594	319	2968	115	132	63	115	436	140	941	286	1860	1256	2168	42702	17092	0.126	59794
25.8	316.81	8.26	1	0.010269	-0.010571	0.009935	0.07673	72199	1.76	139	1216	0	65	2212	1224	1341	40179	0	4524	857	198	3848	294561	4	242	1048	587	137	0	0	0	450	293	2600	150	110	43	87	479	0	1036	103	1664	1019	2074	40225	15728	0.122	55953
25.9	317.81	8.26	1	0.010269	-0.010571	0.009935	0.07673	67905	1.62	161	1150	0	56	2250	1216	1242	35677	41	4389	781	199	3537	280107	0	226	1043	581	146	0	0	95	489	341	2475	90	12	31	146	391	156	612	0	1730	1019	1790	37819	14881	0.117	52700
26	318.81	8.28	1	0.010269	-0.010571	0.009935	0.07673	70180	1.62	157	1226	0	49	2427	1265	1246	37405	0	4598	705	173	3768	287494	0	205	984	596	196	0	0	0	531	236	2501	118	178	47	156	370	47	968	121	1696	1064	2160	38881	15546	0.12	54427
26.1	319.81	8.29	1	0.010269	-0.010571	0.009935	0.07673	70583	1.74	160	1287	0	28	2315	1269	1191	37332	0	4475	791	224	3756	285388	0	235	987	664	103	0	0	103	637	64	2423	292	107	41	200	480	116	892	319	1709	1032	2122	40557	15101	0.121	55658
26.2	320.81	8.26	1	0.010269	-0.010571	0.009935	0.07673	79212	1.74	147	1352	0	82	2607	1128	1496	40745	8	5012	829	215	4217	325398	51	270	1052	722	98	0	0	90	628	298	2794	54	166	65	217	459	39	887	346	1884	1152	2303	42354	16592	0.126	58946
26.3	321.81	8.25	1	0.010269	-0.010571	0.009935	0.07673	70648	1.71	134	1354	0	114	2457	901	1340	40865	83	4776	715	252	3870	296043	0	170	1047	560	145	0	0	14	419	133	2332	64	18	53	130	432	70	1077	166	1779	1095	2204	36472	14603	0.117	51075
26.4	322.81	8.29	1	0.010269	-0.010571	0.009935	0.07673	73069	1.6	151	1198	0	57	2162	1119	1312	38570	0	4345	682	185	3837	289555	0	288	1083	608	107	0	0	0	620	239	2786	125	143	52	115	405	0	914	320	1708	1143	2135	43284	16299	0.124	59583
26.5	323.81	8.3	1	0.010269	-0.010571	0.009935	0.07673	74921	1.71	153	1403	0	95	2726	1142	1472	39959	0	4920	840	230	4049	315835	0	255	1042	671	135	9	0	27	547	394	2472	48	100	87	179	486	72	1022	0	1991	1209	2153	39466	15395	0.12	54861
26.6	324.81	8.31	1	0.010269	-0.010571	0.009935	0.07673	72856	1.81	194	1406	0	112	2321	1014	1412	40806	100	4770	741	292	4027	301671	0	271	1052	559	35	0	0	116	340	184	2508	161	0	61	160	373	152	867	340	1559	1077	2492	39707	15290	0.12	54997
26.7	325.81	8.31	1	0.010269	-0.010571	0.009935	0.07673	78874	1.85	197	1492	0	80	2829	1028	1478	44931	0	5071	851	154	4304	329729	0	207	1022	603	172	46	0	34	517	68	2444	28	0	0	189	452	0	1159	354	1950	1179	2374	40728	15697	0.124	56425
26.8	326.81	8.3	1	0.010269	-0.010571	0.009935	0.07673	80957	1.85	126	1488	0	99	2859	1065	1590	45456	23	5223	876	192	4440	333899	0	196	1104	734	75	27	0	172	537	330	2832	32	140	91	164	477	48	1131	347	2138	1207	2312	43062	16801	0.127	59863
26.9	327.81	8.32	1	0.010269	-0.010571	0.009935	0.07673	87868	1.92	146	1634	0	53	2934	976	1704	47666	60	5711	1050	263	4710	365881	193	250	1303	834	143	0	0	93	577	235	3034	20	8	40	180	585	121	1184	327	1992	1348	1916	44529	17100	0.132	61629
27	328.81	8.31	1	0.010269	-0.010571	0.009935	0.07673	82029	1.88	118	1532	0	70	3040	992	1540	46507	69	5525	939	208	4415	343982	0	210	1178	734	208	0	0	75	620	91	2632	91	0	27	142	601	0	1180	535	2258	1275	1955	40788	16525	0.126	57313
27.1	329.81	8.29	1	0.010269	-0.010571	0.009935	0.07673	83722	1.8	158	1531	0	96	3035	1004	1642	45534	92	5510	957	251	4442	346844	361	220	1199	710	99	33	0	34	588	150	2913	127	219	90	151	542	168	1092	572	1977	1214	1666	42519	17169	0.129	59688
27.2	330.81	8.33	1	0.010269	-0.010571	0.009935	0.07673	86393	1.92	142	1681	0	103	3325	1108	1746	45648	0	5809	956	210	4841	364545	0	224	1221	712	105	56	70	140	574	247	2816	0	105	91	0	506	0	1255	290	2251	1159	2744	42850	16845	0.13	59695
27.3	331.81	8.34	1	0.010269	-0.010571	0.009935	0.07673	78292	1.76	173	1445	0	83	2948	1212	1496	45060	0	4916	823	199	4178	318726	0	260	1137	608	128	80	0	89	629	338	2941	0	0	42	71	463	96	1053	291	1872	1118	2323	43347	16431	0.125	59778
27.4	332.81	8.33	1	0.010269	-0.010571	0.009935	0.07673	78062	1.76	145	1452	0	87	2859	1138	1517	42894	0	4926	861	257	4207	322985	0	282	1126	671	128	0	0	0	599	72	2584	112	51	41	89	530	161	1161	613	2050	1183	2051	41897	16058	0.125	57955
27.5	333.81	8.35	1	0.010269	-0.010571	0.009935	0.07673	77707	1.76	130	1316	0	79	2746	1195	1395	42208	109	4990	944	187	4223	320911	0	171	1062	704	109	0	0	0	614	218	2451	161	196	37	203	512	114	797	136	1898	1220	2770	41519	16044	0.124	57563
27.6	334.81	8.36	1	0.010269	-0.010571	0.009935	0.07673	72844	1.68	121	1199	0	70	2302	1189	1298	39912	69	4347	766	226	3707	289086	89	206	1007	541	120	0	0	0	490	154	2805	101	98	55	62	509	133	829	347	1664	976	1768	42112	16188	0.124	58300
27.7	335.81	8.35	1	0.010269	-0.010571	0.009935	0.07673	76645	1.75	166	1430	0	117	3149	1161	1445	40173	18	4936	962	210	4137	319080	0	247	1168	725	162	12	0	61	573	169	2546	109	53	84	48	399	152	1167	306	1966	1157	2014	40524	16071	0.124	56595
27.8	336.81	8.35	1	0.010269	-0.010571	0.009935	0.07673	85511	1.88	149	1492	0	133	3730	1104	1624	45652	0	5584	966	274	4666	357638	132	265	1133	684	16	0	0	0	472	177	2871	92	34	56	221	523	54	1219	374	1929	1323	2280	43406	16984	0.13	60390
27.9	337.81	8.34	1	0.010269	-0.010571	0.009935	0.07673	87001	1.85	166	1486	0	131	3283	1124	1670	45567	17	5625	961	280	4725	358866	0	255	1203	786	69	0	0	0	758	319	3127	107	91	26	142	515	120	1255	445	2041	1326	2444	45965	17834	0.132	63799
28	338.81	8.31	1	0.010269	-0.010571	0.009935	0.07673	79627	1.8	168	1477	0	28	2489	1202	1419	43811	0	5142	906	199	4209	319547	0	235	1137	691	179	0	0	32	615	39	2882	105	0	43	160	540	173	1076	440	2093	1020	1783	44941	17036	0.129	61977
28.1	339.81	8.29	1	0.010269	-0.010571	0.009935	0.07673	88720	2.04	175	1678	0	85	3342	1088	1634	51014	0	5644	939	319	4746	363723	0	285	1207	786	95	0	0	0	593	118	3176	74	234	97	158	563	172	1281	516	2103	1352	3142	46023	18132	0.134	64155
28.2	340.81	8.26	1	0.010269	-0.010571	0.009935	0.07673	86879	1.99	117	1627	0	127	3599	1114	1697	48560	134	5789	1034	192	4825	366287	5	265	1273	807	160	11	0	0	617	151	2903	217	62	63	259	472	104	1258	613	2281	1427	2036	43411	17099	0.13	60510
28.3	341.81	8.25	1	0.010269	-0.010571	0.009935	0.07673	84738	1.83	192	1578	0	101	3057	1123	1573	47357	116	5396	839	254	4432	342346	76	292	1269	702	159	0	32	11	560	39	3010	167	0	78	133	489	0	1166	487	2042	1190	1950	46362	17558	0.132	63920
28.4	342.81	8.2	1	0.010269	-0.010571	0.009935	0.07673	79058	1.91	142	1478	0	72	2952	1023	1447	44601	151	4776	822	212	4277	319395	0	265	1089	688	138	15	0	0	570	230	2808	164	226	60	187	412	49	964	347	1878	1230	2500	43694	16755	0.128	60449
28.5	343.81	8.17	1	0.010269	-0.010571	0.009935	0.07673	86995	1.89	209	1572	0	98	3244	931	1560	48970	0	5366	928	286	4522	348876	0	227	1186	805	28	0	11	29	676	340	3008	72	157	83	160	458	0	1339	92	2133	1236	2542	47831	18136	0.134	65967
28.6	344.81	8.19	1	0.010269	-0.010571	0.009935	0.07673	100333	2.07	186	1766	0	126	3989	982	1880	54029	37	6287	1010	336	5371	408748	356	289	1492	919	140	0	0	0	887	163	3330	70	128	132	219	591	91	1626	593	2217	1527	2386	52567	19194	0.143	71761
28.7	345.81	8.2	1	0.010269	-0.010571	0.009935	0.07673	93074	2.01	178	1665	0	81	3257	1075	1764	50902	0	6002	969	266	5051	380397	267	282	1304	737	73	0	0	0	734	154	3002	49	35	54	140	535	110	1366	209	2037	1439	1836	48925	18172	0.137	67097
28.8	346.81	8.22	1	0.010269	-0.010571	0.009935	0.07673	71930	1.7	113	1236	0	65	2291	1328	1321	36040	0	4462	742	140	3713	290596	78	253	995	626	13	0	0	0	524	199	2332	74	0	77	185	434	22	660	395	1788	1065	1671	42808	15245	0.124	58053
28.9	347.81	8.17	1	0.010269	-0.010571	0.009935	0.07673	84558	1.83	167	1517	0	87	2731	1127	1512	43475	7	5340	854	246	4509	345465	149	243	1190	723	101	0	0	0	577	151	3075	99	121	92	116	397	59	1452	423	2069	1327	1823	46389	17570	0.131	63959
29	348.81	8.12	1	0.010269	-0.010571	0.009935	0.07673	74961	1.93	140	1343	0	61	2300	1047	1406	40563	0	5039	883	205	3987	309722	0	161	1150	589	119	0	0	59	609	218	2306	0	174	29	83	446	35	1035	323	1890	1107	1906	40393	14883	0.123	55276
29.1	349.81	8.14	1	0.010269	-0.010571	0.009935	0.07673	52048	1.46	94	945	0	14	1740	1036	955	25114	115	3220	508	198	2676	202467	26	203	835	405	64	0	0	36	451	0	1909	139	41	69	77	257	25	580	372	990	752	1524	33421	12943	0.111	46364
29.2	350.81	8.16	1	0.010269	-0.010571	0.009935	0.07673	74297	1.76	135	1278	0	53	2955	968	1295	41084	0	4615	836	143	3865	301545	262	234	1095	651	63	0	0	0	548	178	2668	0	265	27	165	408	0	739	256	1587	1097	1995	40382	16054	0.124	56436
29.3	351.81	8.21	1	0.010269	-0.010571	0.009935	0.07673	80351	1.8	189	1466	0	70	3640	1094	1555	42802	20	5080	938	262	4405	336314	378	245	1183	710	115	0	0	56	632	363	2694	76	69	75	134	531	128	1028	146	2001	1268	1730	41236	16204	0.125	57440
29.4	352.81	8.25	1	0.010269	-0.010571	0.009935	0.07673	69184	1.67	144	1317	0	63	2791	1215	1334	35066	0	4449	629	250	3762	287336	207	200	949	636	126	28	0	15	532	261	2402	0	150	95	144	390	86	962	49	1599	1082	1946	37650	15005	0.119	52655
29.5	353.81	8.21	1	0.010269	-0.010571	0.009935	0.07673	80091	1.86	178	1455	0	68	2688	951	1553	43323	91	5224	899	216	4225	323489	208	279	1268	676	74	0	0	0	596	223	2822	127	113	62	126	428	61	1039	235	1925	1188	1794	44158	17294	0.129	61452
29.6	354.81	8.23	1	0.010269	-0.010571	0.009935	0.07673	85762	1.89	186	1512	0	104	3951	1043	1577	45749	40	5290	982	264	4365	343063	0	324	1290	771	45	0	0	8	783	247	2933	36	41	82	141	524	199	1162	197	2179	1225	2275	47930	17276	0.133	65206
29.7	355.81	8.23	1	0.010269	-0.010571	0.009935	0.07673	81830	1.82	182	1453	0	118	3064	1115	1517	42017	23	5152	837	212	4320	335965	0	235	1166	662	67	0	0	59	718	158	2822	197	133	68	205	344	212	1049	436	2051	1194	2314	44052	16502	0.129	60554
29.8	356.81	8.24	1	0.010269	-0.010571	0.009935	0.07673	68448	1.7	124	1133	0	97	3236	1206	1219	34707	42	4285	735	187	3663	275843	196	161	883	594	0	0	0	0	730	70	2234	203	82	0	206	384	59	760	420	1643	983	1230	39824	15196	0.119	55020
29.9	357.81	8.25	1	0.010269	-0.010571	0.009935	0.07673	85319	1.99	105	1373	0	99	3950	1160	1536	51346	0	5257	912	260	4445	340959	0	261	1138	718	104	0	0	0	852	157	3633	178	0	0	161	541	172	1103	513	1991	1181	2363	46364	17349	0.132	63713
30	358.81	8.26	1	0.010269	-0.010571	0.009935	0.07673	75496	1.82	131	1232	0	87	3068	1275	1444	38145	5	4748	812	186	4003	307715	206	288	1105	667	0	0	0	44	674	279	2650	158	204	97	121	415	202	955	231	1632	1140	2058	42162	15995	0.125	58157
30.1	359.81	8.26	1	0.010269	-0.010571	0.009935	0.07673	71459	1.77	113	1241	0	87	2314	1270	1339	35475	10	4661	874	240	3713	289410	0	248	1048	584	45	0	0	0	492	123	2380	208	69	109	199	385	122	733	309	1661	1092	2153	41458	15633	0.123	57091
30.2	360.81	8.21	1	0.010269	-0.010571	0.009935	0.07673	81309	1.84	150	1520	0	68	2637	1117	1515	43960	32	5374	932	329	4465	331735	380	275	1114	720	112	0	31	27	640	317	2751	159	219	64	171	413	19	1101	199	1725	1170	2155	43890	16350	0.129	60240
30.3	361.81	8.18	1	0.010269	-0.010571	0.009935	0.07673	85745	1.93	182	1595	0	85	2960	1040	1649	48408	44	5419	975	276	4444	347526	0	225	1186	627	115	0	18	51	577	133	2947	56	246	87	141	524	65	1385	478	2199	1255	2667	46421	17474	0.132	63895
30.4	362.81	8.17	1	0.010269	-0.010571	0.009935	0.07673	90690	2.01	195	1806	0	100	3660	1002	1765	53070	36	5996	958	176	5123	378672	0	218	1329	872	155	0	0	0	572	185	2960	84	96	16	129	513	0	1260	328	2219	1369	2636	44521	17945	0.132	62466
30.5	363.81	8.19	1	0.010269	-0.010571	0.009935	0.07673	82679	1.84	146	1497	0	97	3081	1062	1549	45925	81	5332	917	253	4482	344675	9	216	1154	660	104	0	60	0	598	163	3247	248	142	72	133	527	0	1268	449	2025	1308	1983	42940	17089	0.127	60029
30.6	364.81	8.21	1	0.010269	-0.010571	0.009935	0.07673	77544	1.81	150	1479	0	116	2895	1199	1484	41964	0	4848	813	282	4267	314056	0	228	1147	712	47	0	0	20	614	264	2843	127	123	95	197	392	0	826	0	1782	1107	2311	42921	16599	0.126	59520
30.7	365.81	8.2	1	0.010269	-0.010571	0.009935	0.07673	82409	1.71	149	1386	0	88	3529	1156	1400	43143	0	4832	786	177	4231	327043	123	259	1243	707	197	0	0	0	734	74	2993	203	19	67	89	465	135	1062	511	1819	1198	2157	46894	18060	0.132	64954
30.8	366.81	8.18	1	0.010269	-0.010571	0.009935	0.07673	83755	1.94	172	1551	0	114	3219	1159	1564	46173	33	5468	981	245	4583	354201	83	217	1146	677	29	0	0	0	639	52	2723	88	0	41	116	535	43	1256	482	2089	1366	2059	41438	16443	0.128	57881
30.9	367.81	8.18	1	0.010269	-0.010571	0.009935	0.07673	73250	1.68	129	1335	0	73	2886	1117	1344	35149	0	4431	752	168	3903	294356	136	247	1066	576	28	0	0	41	554	219	2929	157	11	66	87	404	19	817	311	1894	1106	1567	42612	16603	0.125	59215
31	368.81	8.2	1	0.010269	-0.010571	0.009935	0.07673	80351	1.77	119	1262	0	97	3329	1233	1531	38749	128	4999	784	286	4172	320682	50	179	1157	559	130	0	0	0	819	246	2823	159	254	78	95	412	129	1080	449	2039	1193	2121	46834	17138	0.13	63972
31.1	369.81	8.21	1	0.010269	-0.010571	0.009935	0.07673	79949	1.83	127	1249	0	72	3173	1191	1427	41875	0	5098	894	219	3937	314353	342	274	1088	605	75	0	0	49	714	312	2707	43	7	0	131	443	0	1155	254	1610	1192	1883	47659	17151	0.13	64810
31.2	370.81	8.17	1	0.010269	-0.010571	0.009935	0.07673	83923	1.98	168	1430	0	109	3069	1200	1581	46627	0	5431	985	239	4538	343620	0	244	1068	723	133	0	0	6	619	224	2875	133	178	63	168	498	21	980	116	2038	1246	2390	44567	16644	0.129	61211
31.3	371.81	8.12	1	0.010269	-0.010571	0.009935	0.07673	74407	1.8	153	1410	0	57	2398	1029	1382	43146	8	4670	904	176	3884	300756	191	257	1057	578	90	19	0	0	587	204	2977	0	152	49	169	349	206	921	283	1486	1112	1984	41674	16589	0.123	58263
31.4	372.81	8.15	1	0.010269	-0.010571	0.009935	0.07673	70415	1.78	137	1290	0	94	3035	1106	1404	39048	8	4486	709	211	3852	287446	163	204	1096	646	74	0	0	42	551	163	2414	0	153	69	114	487	0	817	237	1843	1022	1428	38356	15104	0.12	53460
31.5	373.81	8.17	1	0.010269	-0.010571	0.009935	0.07673	77790	1.64	153	1324	0	122	3184	1159	1338	39608	0	4600	810	258	4025	308821	0	200	1045	564	115	0	38	0	673	295	2801	79	80	53	85	382	0	1152	79	1918	1140	2708	44796	16891	0.128	61687
31.6	374.81	8.17	1	0.010269	-0.010571	0.009935	0.07673	77444	1.92	157	1451	0	104	2993	1093	1387	42480	0	4762	855	158	4206	319728	90	280	1110	678	92	30	0	50	649	244	2697	195	87	20	134	494	203	1063	402	1698	1174	2099	40983	16297	0.124	57280
31.7	375.81	8.18	1	0.010269	-0.010571	0.009935	0.07673	81603	1.91	143	1585	0	141	3858	1112	1541	44170	74	5364	989	169	4229	328520	153	225	1260	725	194	0	0	60	747	356	2648	0	239	77	129	471	26	889	192	1978	1179	1653	44547	16596	0.128	61143
31.8	376.81	8.19	1	0.010269	-0.010571	0.009935	0.07673	77365	1.68	184	1468	0	117	3491	1159	1552	39789	56	5127	850	326	4036	312077	0	230	1206	648	140	0	0	49	594	376	2592	17	120	56	135	463	157	896	173	2100	1149	1823	42815	16419	0.125	59234
31.9	377.81	8.18	1	0.010269	-0.010571	0.009935	0.07673	73816	1.76	156	1336	0	121	3513	1109	1430	42148	0	4751	722	235	3941	301821	0	246	1019	592	0	0	0	0	522	186	2723	132	97	47	156	364	47	986	318	1835	1134	2373	39619	15692	0.122	55311
32	378.81	8.21	1	0.010269	-0.010571	0.009935	0.07673	72734	1.74	157	1191	0	135	3685	1164	1345	38753	0	4347	738	200	3622	288816	100	224	929	582	35	0	0	30	741	183	2750	123	171	29	274	387	132	678	338	1536	1141	1980	41671	16302	0.124	57973
32.1	379.81	8.21	1	0.010269	-0.010571	0.009935	0.07673	75184	1.82	108	1283	0	116	3866	1207	1400	40907	0	4785	779	164	3997	304594	75	169	1137	615	51	0	0	0	730	184	2913	145	106	37	46	455	236	778	337	1796	980	1709	41794	15879	0.124	57673
32.2	380.81	8.24	1	0.010269	-0.010571	0.009935	0.07673	67465	1.69	130	1115	0	108	3125	1235	1193	34907	0	4317	662	214	3516	266945	191	220	965	641	122	0	0	39	700	362	2577	140	0	81	104	390	113	652	0	1433	1007	1729	40485	15741	0.12	56226
32.3	381.81	8.26	1	0.010269	-0.010571	0.009935	0.07673	80167	1.85	169	1330	0	162	4743	1210	1546	37384	5	5232	984	234	4352	330050	0	171	1049	744	0	0	0	58	884	153	2883	202	155	0	161	465	81	1110	566	1944	1229	3131	43530	16853	0.127	60383
32.4	382.81	8.27	1	0.010269	-0.010571	0.009935	0.07673	72446	1.68	151	1152	0	149	3934	1296	1374	33982	28	4568	662	203	3726	290670	0	254	1143	686	84	0	0	0	747	275	2821	134	101	99	133	543	131	790	230	1533	1073	2463	41910	16357	0.124	58267
32.5	383.81	8.22	1	0.010269	-0.010571	0.009935	0.07673	80304	1.83	194	1487	0	182	4425	1188	1672	43463	12	5299	873	182	4230	323409	0	151	1250	676	71	0	0	0	934	147	2895	119	161	25	66	474	154	877	416	1831	1204	2050	44757	16889	0.128	61646
32.6	384.81	8.2	1	0.010269	-0.010571	0.009935	0.07673	79765	1.73	133	1332	0	194	5070	1278	1492	40112	0	5037	831	267	4064	313144	0	302	1174	735	104	0	0	0	1108	167	2909	116	41	0	152	540	239	899	537	1761	1252	2281	46440	17513	0.131	63953
32.7	385.81	8.23	1	0.010269	-0.010571	0.009935	0.07673	71217	1.79	103	1171	0	113	3852	1367	1234	38489	0	4323	589	204	3681	280323	27	215	1074	636	93	9	10	0	747	19	2856	37	98	89	137	405	0	943	545	1612	1036	2032	41153	15542	0.125	56695
32.8	386.81	8.19	1	0.010269	-0.010571	0.009935	0.07673	75440	1.78	150	1314	0	136	3945	1284	1462	38937	104	4568	788	220	3892	298472	46	252	985	562	95	0	0	76	771	125	2811	128	150	44	159	466	156	973	285	1588	1006	2011	44317	16586	0.126	60903
32.9	387.81	8.14	1	0.010269	-0.010571	0.009935	0.07673	89032	1.9	140	1504	0	207	4715	1095	1684	45218	59	5581	998	198	4611	354780	217	254	1297	662	179	0	0	17	977	270	3068	102	54	15	134	572	187	1170	104	2019	1416	1784	49404	18301	0.136	67705
33	388.81	8.11	1	0.010269	-0.010571	0.009935	0.07673	84142	1.9	165	1438	0	103	3902	1115	1489	46047	0	5264	869	259	4451	344190	0	215	1279	697	46	0	0	36	707	185	2920	30	147	48	182	375	52	1161	104	1954	1196	2030	44238	16669	0.131	60907
33.1	389.81	8.07	1	0.010269	-0.010571	0.009935	0.07673	37916	1.53	62	220	0	7	767	917	212	6593	0	785	126	50	801	77806	0	230	601	186	0	0	0	0	520	260	2679	141	124	18	138	125	151	231	103	169	332	2512	43998	16988	0.14	60986
33.2	390.81	7.98	1	0.010269	-0.010571	0.009935	0.07673	46277	3.14	53	35	0	12	46591	317	9	23930	158	2262	0	0	250	43486	0	293	563	2395	0	0	0	84	722	323	3310	90	142	199	0	376	35	333	12	0	171	3878	51152	19763	0.144	70915
33.3	391.81	8.09	1	0.010269	-0.010571	0.009935	0.07673	63354	4.91	40	51	0	95	159036	611	0	80539	497	7337	0	0	97	25076	0	269	1269	6696	115	135	169	358	642	14	2333	0	139	880	296	909	120	267	0	5	0	3355	48380	18929	0.133	67309
33.4	392.81	8.17	1	0.010269	-0.010571	0.009935	0.07673	58209	4.18	59	72	0	90	144157	947	0	73038	323	7014	0	0	38	16465	0	288	1099	5986	90	50	136	243	584	99	2108	0	136	783	167	771	0	340	0	0	0	2513	48859	17944	0.133	66803
33.5	393.81	8.14	1	0.010269	-0.010571	0.009935	0.07673	59093	4.78	65	74	0	87	148924	801	0	74863	644	6900	0	0	0	15064	0	198	1135	6234	38	88	32	162	608	74	2249	0	196	849	301	764	118	0	0	120	0	3201	49303	18325	0.133	67628
33.6	394.81	8.09	1	0.010269	-0.010571	0.009935	0.07673	47956	4.95	56	119	27	68	151846	758	0	78550	587	6865	0	0	0	9245	0	108	161	6331	86	201	446	209	525	0	1073	0	0	884	323	994	0	100	0	205	0	2202	29362	11335	0.105	40697
33.7	395.81	8.1	1	0.010269	-0.010571	0.009935	0.07673	42258	4.52	55	86	0	89	149974	797	0	77268	452	6828	0	0	0	2769	0	45	74	6142	296	359	525	429	410	0	307	0	0	831	290	1125	58	75	0	88	0	845	21190	8589	0.095	29779

## Sheet: NW-26
Depth	position (mm)	sample surface	validity	E-gain	E-offset	F-slope	F-offset	cps	MSE	Al	Si	P	S	Cl	Ar	K	Ca	Sc	Ti	V	Cr	Mn	Fe	Co	Ni	Cu	Zn	Ga	Ge	As	Se	Br	Rb	Sr	Y	Zr	Ba	Ta	W	Pb	Fe a*2	Fe a+b	S1	S2	S3	Mo inc	Mo coh	Dt	Inc+coh
0	150.65	7.92	1	0.010269	-0.010571	0.009935	0.07673	105416	1.81	93	871	0	94	2433	1060	1956	36371	37	6014	1045	276	4914	395606	9	295	1310	761	10	34	0	120	1076	486	3306	42	290	0	298	576	68	1336	125	2412	1476	2471	64428	20529	0.154	84957
0.1	151.65	7.93	1	0.010269	-0.010571	0.009935	0.07673	99527	1.88	77	844	15	141	2575	1013	1968	34549	0	5618	957	314	4762	364220	288	231	1260	750	45	181	110	21	1222	81	2827	36	200	67	378	651	132	1437	461	2382	1409	1652	63466	19240	0.15	82706
0.2	152.65	7.92	1	0.010269	-0.010571	0.009935	0.07673	106248	2.03	119	1120	0	97	2167	1048	2201	41439	23	6489	1036	353	5434	421632	0	247	1423	812	42	0	46	0	708	490	3306	27	13	103	146	698	105	1656	248	2675	1506	2877	60006	19670	0.15	79676
0.3	153.65	7.92	1	0.010269	-0.010571	0.009935	0.07673	106468	2.02	122	1081	0	97	1985	1047	2176	41736	0	6668	1149	321	5591	423590	133	307	1437	825	8	0	0	128	866	428	3440	31	0	73	232	572	116	1709	271	2443	1609	2729	59736	19515	0.15	79251
0.4	154.65	7.92	1	0.010269	-0.010571	0.009935	0.07673	106245	2.03	128	1137	0	114	2015	956	2183	42169	49	6701	1155	234	5580	422595	52	335	1448	820	121	17	75	96	797	214	3346	21	57	104	202	612	0	1885	603	2451	1590	2515	59158	19670	0.15	78828
0.5	155.65	7.92	1	0.010269	-0.010571	0.009935	0.07673	106154	1.96	104	1063	7	88	2086	1039	2164	41429	83	6711	1035	376	5376	424553	277	271	1372	935	164	0	67	205	900	185	3348	0	115	171	109	649	76	2020	738	2569	1517	2270	58893	19588	0.149	78481
0.6	156.65	7.92	1	0.010269	-0.010571	0.009935	0.07673	105308	2.07	148	992	0	94	2084	1059	2195	41687	0	6651	1032	319	5692	421542	0	294	1428	840	226	0	119	181	801	146	3391	127	0	99	140	709	109	1616	640	2865	1593	2695	57682	19438	0.149	77120
0.7	157.65	7.92	1	0.010269	-0.010571	0.009935	0.07673	104980	2.02	95	1003	0	98	2145	1034	2037	42502	50	6601	1164	372	5433	420204	329	234	1308	829	50	13	0	26	821	160	3453	0	0	62	303	617	86	1582	634	2580	1550	2536	58183	19474	0.148	77657
0.8	158.65	7.92	1	0.010269	-0.010571	0.009935	0.07673	104121	1.9	151	1055	0	84	2187	992	2069	41699	76	6543	1037	327	5208	416011	208	268	1406	819	228	0	0	48	943	31	3325	81	172	43	200	598	0	1617	753	2538	1650	2389	56968	19167	0.148	76135
0.9	159.65	7.92	1	0.010269	-0.010571	0.009935	0.07673	102900	1.85	117	931	0	83	2268	1020	2003	40681	62	6367	1080	274	5137	412060	203	228	1394	863	110	0	82	33	745	264	3355	26	0	22	270	690	75	1938	513	2149	1523	2849	56409	19222	0.147	75631
1	160.65	7.92	1	0.010269	-0.010571	0.009935	0.07673	102111	1.95	123	903	0	98	2288	1076	2011	41000	99	6463	1069	288	5152	409358	51	260	1404	799	124	69	46	42	836	227	3384	18	85	31	197	604	0	1668	462	2457	1442	2675	55115	19169	0.146	74284
1.1	161.65	7.92	1	0.010269	-0.010571	0.009935	0.07673	101923	1.94	109	924	0	103	2168	1041	2000	41655	8	6118	1185	266	5001	409687	0	283	1499	861	188	54	0	49	821	395	3364	0	51	97	186	651	122	1465	193	2481	1517	2860	55977	19004	0.145	74981
1.2	162.65	7.92	1	0.010269	-0.010571	0.009935	0.07673	101521	1.97	100	928	0	68	2158	1128	1952	41534	65	6154	1033	401	5169	408065	0	225	1411	802	46	0	0	80	751	221	3284	146	253	105	231	722	92	1622	283	2715	1576	3156	54681	18912	0.145	73593
1.3	163.65	7.92	1	0.010269	-0.010571	0.009935	0.07673	101418	1.91	116	904	0	69	2123	1155	2013	41670	88	6440	1049	281	5077	408169	0	255	1421	825	98	0	189	49	771	95	3212	23	154	39	192	689	0	1739	560	2417	1543	3132	54533	19028	0.145	73561
1.4	164.65	7.92	1	0.010269	-0.010571	0.009935	0.07673	100930	1.85	120	894	0	107	2118	1036	1961	41742	98	6274	1010	350	5149	404121	0	166	1285	731	64	0	45	0	810	11	3414	0	78	56	247	641	0	1755	572	2523	1538	3587	54615	18805	0.145	73420
1.5	165.65	7.93	1	0.010269	-0.010571	0.009935	0.07673	100409	2.05	68	920	0	86	2159	1040	1891	41688	54	6162	1015	294	5031	401031	0	231	1272	769	42	0	0	40	752	50	3442	100	100	38	187	633	74	1299	578	2208	1466	3188	55818	19223	0.144	75041
1.6	166.65	7.93	1	0.010269	-0.010571	0.009935	0.07673	100711	1.84	129	875	0	96	2097	1109	1896	42261	67	6308	1052	237	4998	402146	0	235	1423	887	144	0	0	155	862	204	3339	0	78	58	153	694	161	1711	612	2362	1572	2746	55588	19382	0.145	74970
1.7	167.65	7.93	1	0.010269	-0.010571	0.009935	0.07673	100647	1.79	101	910	0	84	2095	1145	1946	42601	34	6241	1087	257	5074	401355	0	235	1343	661	135	0	0	0	780	352	3302	46	251	55	128	662	114	1467	189	2567	1478	2829	55186	19199	0.145	74385
1.8	168.65	7.93	1	0.010269	-0.010571	0.009935	0.07673	100764	1.96	119	927	0	68	2143	1137	1954	42096	27	6220	1019	190	5010	402175	0	226	1335	780	55	0	0	73	749	397	3386	0	168	99	248	589	53	1746	83	2566	1474	3025	54553	19266	0.145	73819
1.9	169.65	7.93	1	0.010269	-0.010571	0.009935	0.07673	100172	1.9	72	924	0	77	2126	1136	1960	41161	57	6207	1022	359	4922	399691	0	271	1345	852	78	0	0	59	802	181	3266	23	120	61	242	579	20	1394	192	2518	1560	2508	55117	18815	0.145	73932
2	170.65	7.93	1	0.010269	-0.010571	0.009935	0.07673	100813	2.01	105	900	0	79	2099	1028	1927	41945	0	6328	1087	294	5017	401352	0	261	1354	897	155	0	10	58	744	104	3385	78	24	76	195	673	0	1632	586	2624	1469	2845	55659	18879	0.146	74538
2.1	171.65	7.93	1	0.010269	-0.010571	0.009935	0.07673	101877	1.81	108	964	0	110	2093	1113	2050	41248	58	6447	1075	344	5118	402144	0	251	1328	760	55	0	35	4	729	69	3392	93	157	34	219	633	93	1460	447	2327	1514	3059	58079	19091	0.147	77170
2.2	172.65	7.94	1	0.010269	-0.010571	0.009935	0.07673	100820	1.94	94	894	0	72	2066	1068	1972	40047	24	6092	1045	268	4956	398137	110	196	1379	744	77	0	0	0	819	250	3204	25	115	31	211	587	146	1523	417	2118	1616	2763	57516	19030	0.147	76546
2.3	173.65	7.93	1	0.010269	-0.010571	0.009935	0.07673	100756	1.99	127	889	0	81	2138	1063	1944	40471	0	6144	1021	236	5008	400229	59	187	1414	830	177	9	0	72	627	305	3230	0	91	53	174	707	86	1409	213	2232	1490	2813	55832	19374	0.145	75206
2.4	174.65	7.94	1	0.010269	-0.010571	0.009935	0.07673	99742	1.86	141	892	0	80	2188	1137	1932	40104	0	6229	1047	295	4789	395267	0	293	1267	918	131	28	0	0	736	45	3327	185	76	53	177	571	108	1627	630	2644	1537	3003	55817	19025	0.145	74842
2.5	175.65	7.93	1	0.010269	-0.010571	0.009935	0.07673	100750	1.91	125	861	0	111	2334	1158	1984	40521	67	6087	1082	261	4975	399267	0	273	1289	821	144	0	104	143	785	181	3233	218	85	84	321	715	5	1702	372	2432	1572	2731	55850	19183	0.147	75033
2.6	176.65	7.93	1	0.010269	-0.010571	0.009935	0.07673	100476	1.94	101	831	0	99	2304	1074	1883	39846	0	6193	1014	357	4822	397771	142	280	1311	775	107	0	0	61	785	327	3376	49	8	79	154	628	123	1596	364	2140	1573	2740	56036	19261	0.146	75297
2.7	177.65	7.93	1	0.010269	-0.010571	0.009935	0.07673	100263	1.95	112	825	0	71	2164	1059	1979	39601	71	6107	949	258	4874	395006	0	264	1256	847	249	64	0	154	884	188	3511	0	41	103	158	668	146	1805	488	2345	1407	2858	56680	19223	0.147	75903
2.8	178.65	7.93	1	0.010269	-0.010571	0.009935	0.07673	100523	1.84	110	833	0	97	2307	1122	1951	38628	61	6115	1039	234	4764	393438	0	222	1298	764	69	0	0	61	785	174	3348	88	174	71	196	570	103	1333	518	2159	1612	2821	58851	19385	0.147	78236
2.9	179.65	7.93	1	0.010269	-0.010571	0.009935	0.07673	99707	1.89	141	817	0	93	2214	1066	1880	38010	85	6200	974	321	4698	390341	304	254	1347	871	103	9	10	31	872	223	3405	4	152	69	150	637	36	1438	351	2308	1536	2200	57314	19039	0.146	76353
3	180.65	7.93	1	0.010269	-0.010571	0.009935	0.07673	100209	1.88	133	859	0	110	2117	1142	1929	39006	124	6161	996	259	5436	392766	186	303	1382	713	0	134	0	103	750	342	3212	0	65	38	275	543	147	1320	458	2215	1516	2351	57639	19213	0.147	76852
3.1	181.65	7.93	1	0.010269	-0.010571	0.009935	0.07673	100051	1.82	132	857	0	127	2226	1089	1903	39033	0	5882	928	318	4708	392297	165	223	1401	837	187	0	0	239	897	196	3480	0	109	122	138	678	194	1562	451	2110	1540	2607	57830	19162	0.146	76992
3.2	182.65	7.92	1	0.010269	-0.010571	0.009935	0.07673	100063	1.84	140	831	0	87	2255	1073	1965	38147	10	5995	1014	265	4843	390962	0	300	1364	777	133	0	17	0	791	15	3337	0	0	0	119	668	0	1510	764	2413	1484	2708	58318	19120	0.147	77438
3.3	183.65	7.93	1	0.010269	-0.010571	0.009935	0.07673	98240	1.79	127	798	0	111	2211	1139	1789	38470	114	5960	1018	343	4743	383447	0	269	1219	870	100	0	0	0	897	386	3378	72	208	43	259	605	86	1591	236	2416	1496	2634	57904	19269	0.145	77173
3.4	184.65	7.92	1	0.010269	-0.010571	0.009935	0.07673	99752	1.84	116	855	0	110	2387	1066	1864	39523	70	5937	1011	297	4919	391844	0	280	1453	844	173	41	0	148	723	291	3309	0	0	42	242	617	77	1493	345	2325	1548	2685	57010	19071	0.146	76081
3.5	185.65	7.92	1	0.010269	-0.010571	0.009935	0.07673	98680	1.96	133	831	0	125	2321	1077	1784	39005	12	5927	1044	246	4833	390541	0	280	1306	774	33	0	0	0	657	344	3184	0	235	60	257	668	150	1472	357	2300	1469	2776	55106	18643	0.145	73749
3.6	186.65	7.92	1	0.010269	-0.010571	0.009935	0.07673	97876	1.86	83	821	0	114	2286	1157	1726	38642	45	6014	1041	272	4728	386601	0	243	1198	751	47	0	0	97	789	162	3249	0	73	0	304	549	185	1313	311	2185	1592	3021	54341	18688	0.144	73029
3.7	187.65	7.91	1	0.010269	-0.010571	0.009935	0.07673	99173	1.82	71	811	0	86	2508	1073	1685	39476	0	5913	1055	347	4941	392460	211	200	1233	836	183	0	0	217	894	113	3378	121	158	77	249	629	167	1490	584	2318	1411	2158	56071	19336	0.144	75407
3.8	188.65	7.92	1	0.010269	-0.010571	0.009935	0.07673	99730	1.9	121	808	8	99	2332	1108	1872	39776	76	6075	991	333	4941	392865	0	266	1383	733	187	0	19	81	711	116	3177	63	205	29	76	679	68	1629	466	2269	1450	3705	56828	18687	0.145	75515
3.9	189.65	7.91	1	0.010269	-0.010571	0.009935	0.07673	99877	1.8	140	838	0	111	2329	1113	1862	39940	63	5835	987	285	4880	391954	0	302	1328	814	47	0	0	163	793	172	3317	0	193	99	210	628	73	1490	486	2262	1670	2927	57381	18982	0.146	76363
4	190.65	7.91	1	0.010269	-0.010571	0.009935	0.07673	99414	1.87	112	763	0	115	2324	1052	1774	39838	20	6156	904	266	4877	389361	221	314	1417	676	28	19	139	7	776	104	3380	0	99	59	244	632	22	1572	534	2368	1667	2077	56928	18999	0.146	75927
4.1	191.65	7.92	1	0.010269	-0.010571	0.009935	0.07673	98782	1.87	80	772	0	82	2171	1081	1822	39595	0	6057	1038	296	5124	388063	142	307	1299	812	165	0	0	72	959	184	3269	69	146	26	258	657	170	1438	423	2429	1213	2238	57461	18848	0.146	76309
4.2	192.65	7.93	1	0.010269	-0.010571	0.009935	0.07673	99223	1.94	107	859	0	93	2123	1125	1865	39505	0	5856	970	323	4839	390054	0	305	1315	785	197	0	0	101	811	224	3392	33	29	56	217	651	124	1555	462	2516	1325	2972	57992	19302	0.146	77294
4.3	193.65	7.93	1	0.010269	-0.010571	0.009935	0.07673	99668	1.87	152	877	0	92	2207	1036	1851	39452	50	5972	920	299	4895	389610	160	263	1419	818	203	11	102	95	870	237	3283	111	228	17	153	612	22	1414	565	2008	1609	2622	57353	19068	0.146	76421
4.4	194.65	7.93	1	0.010269	-0.010571	0.009935	0.07673	100412	1.95	107	847	0	79	2231	1066	1931	39756	75	5988	1064	275	4816	392356	0	267	1313	717	143	0	55	0	821	124	3392	70	0	39	120	536	25	1846	668	2253	1457	3125	58149	19330	0.147	77479
4.5	195.65	7.93	1	0.010269	-0.010571	0.009935	0.07673	101006	1.87	142	871	0	76	2266	1115	1849	39764	9	6081	1029	261	4809	395685	26	242	1423	764	89	0	93	0	917	245	3332	48	97	71	280	599	111	1599	419	2407	1587	2355	58464	19498	0.148	77962
4.6	196.65	7.94	1	0.010269	-0.010571	0.009935	0.07673	100475	1.83	125	847	10	95	2179	1168	1896	38349	48	5909	1042	292	4861	392882	0	280	1397	761	120	26	62	0	883	379	3233	97	45	138	234	595	37	1628	368	2416	1553	2496	58621	19229	0.147	77850
4.7	197.65	7.93	1	0.010269	-0.010571	0.009935	0.07673	100877	1.89	102	850	0	104	2224	1065	1840	38932	19	6034	1018	350	5085	395102	0	319	1398	834	195	111	10	63	774	260	3326	0	0	47	160	667	15	1680	294	2433	1665	2525	58363	19121	0.147	77484
4.8	198.65	7.94	1	0.010269	-0.010571	0.009935	0.07673	99975	1.87	124	904	0	132	2121	1088	1838	38103	103	5945	980	339	4736	391879	0	394	1443	815	234	0	60	120	789	27	3264	0	105	57	189	642	32	1593	717	2533	1601	3011	57642	19123	0.146	76765
4.9	199.65	7.94	1	0.010269	-0.010571	0.009935	0.07673	99031	1.84	94	819	0	107	2259	1124	1889	36983	72	6023	1062	343	4748	387484	0	264	1281	685	107	0	126	97	961	139	3341	64	0	28	223	558	19	1385	558	2434	1504	2523	58374	19435	0.146	77809
5	200.65	7.94	1	0.010269	-0.010571	0.009935	0.07673	99211	1.91	76	814	0	78	2151	1006	1894	38309	25	5951	931	277	4803	387975	0	267	1324	850	119	52	58	106	899	76	3208	88	0	63	176	644	9	1457	620	2323	1457	2628	57904	18970	0.146	76874
5.1	201.65	7.95	1	0.010269	-0.010571	0.009935	0.07673	98354	1.74	94	858	0	110	2110	1150	1861	38131	101	5862	900	280	4680	383405	21	280	1323	794	138	0	0	109	913	255	3346	0	56	80	324	625	66	1317	454	2498	1452	2488	57886	19080	0.146	76966
5.2	202.65	7.95	1	0.010269	-0.010571	0.009935	0.07673	98997	1.82	152	797	0	90	2144	1101	1898	37869	29	5719	960	315	4570	386077	0	268	1289	757	175	0	11	0	837	80	3303	106	217	83	230	651	117	1492	571	2338	1470	2621	58618	19201	0.146	77819
5.3	203.65	7.95	1	0.010269	-0.010571	0.009935	0.07673	99539	1.86	115	882	0	99	2109	1066	1893	37875	0	5958	986	294	4578	387072	0	207	1219	704	69	0	141	169	837	232	3271	189	245	53	309	628	0	1545	635	2200	1451	3119	59122	19610	0.146	78732
5.4	204.65	7.95	1	0.010269	-0.010571	0.009935	0.07673	99803	1.74	125	828	0	39	2154	1114	1977	37657	0	5774	1000	319	4628	387014	30	294	1424	719	134	53	0	248	880	0	3450	74	0	105	299	717	117	1476	627	2553	1589	2117	59820	19303	0.148	79123
5.5	205.65	7.94	1	0.010269	-0.010571	0.009935	0.07673	101057	1.85	92	856	0	93	2205	1106	1947	37800	82	5942	950	188	4680	390606	79	231	1336	716	158	0	0	28	934	133	3213	77	0	73	187	669	68	1295	485	2123	1575	2599	60231	19558	0.149	79789
5.6	206.65	7.94	1	0.010269	-0.010571	0.009935	0.07673	101792	1.96	91	867	0	98	2209	1087	1854	36775	46	6089	1051	346	4580	392061	0	207	1319	778	88	0	0	164	808	196	3381	56	0	81	175	593	162	1461	646	2195	1477	2744	61094	19424	0.15	80518
5.7	207.65	7.93	1	0.010269	-0.010571	0.009935	0.07673	101060	1.81	75	751	0	112	2326	1075	1925	36305	84	5911	968	302	4578	388719	0	323	1237	796	199	9	102	162	902	252	3509	27	88	70	259	584	145	1607	534	2554	1416	2827	59823	19440	0.15	79263
5.8	208.65	7.93	1	0.010269	-0.010571	0.009935	0.07673	100282	1.87	64	763	0	88	2353	1066	1807	36021	0	5874	1024	271	4556	385316	33	254	1288	750	7	60	0	0	819	142	3162	0	81	41	303	547	158	1401	583	2269	1502	2435	60252	19055	0.149	79307
5.9	209.65	7.93	1	0.010269	-0.010571	0.009935	0.07673	101066	1.9	108	847	24	108	2298	1089	1950	37222	0	6007	976	267	4826	391736	0	291	1302	771	48	0	82	150	873	303	3256	53	225	66	217	639	46	1526	355	2341	1480	2926	60242	19067	0.149	79309
6	210.65	7.93	1	0.010269	-0.010571	0.009935	0.07673	101611	1.86	94	878	0	102	2281	1096	1912	38250	103	6082	1104	278	4807	394578	0	294	1294	725	94	0	0	147	1006	170	3394	89	62	15	296	737	182	1437	456	2336	1555	2903	59974	19556	0.149	79530
6.1	211.65	7.93	1	0.010269	-0.010571	0.009935	0.07673	100646	1.86	149	841	0	114	2245	1084	1862	37494	104	5883	965	331	4702	390729	0	248	1269	737	39	0	26	29	886	122	3255	78	89	98	269	537	0	1724	425	2566	1550	3160	60234	19528	0.148	79762
6.2	212.65	7.94	1	0.010269	-0.010571	0.009935	0.07673	99782	1.83	70	753	0	57	2227	1080	1890	37547	24	5808	1004	253	4586	386366	0	238	1302	702	11	0	0	0	975	103	3431	163	252	71	239	640	310	1397	591	2583	1449	2526	59478	19285	0.148	78763
6.3	213.65	7.94	1	0.010269	-0.010571	0.009935	0.07673	99948	1.86	58	819	0	78	2183	1109	1938	37403	0	5934	1057	293	4718	386458	357	346	1320	804	0	0	0	33	864	210	3258	0	48	106	379	636	178	1467	419	2231	1603	2076	59954	19491	0.148	79445
6.4	214.65	7.95	1	0.010269	-0.010571	0.009935	0.07673	100119	1.84	113	806	0	135	2234	1118	1875	37188	44	6004	932	290	4654	385399	0	220	1296	715	9	0	57	149	707	291	3249	0	91	9	319	517	0	1483	426	2310	1487	3163	60214	19183	0.149	79397
6.5	215.65	7.95	1	0.010269	-0.010571	0.009935	0.07673	100311	1.87	79	803	10	96	2193	1167	1888	37143	10	5894	922	290	4698	385484	0	298	1309	717	120	0	0	0	979	68	3300	32	67	88	311	616	41	1472	632	2286	1424	2902	60590	19007	0.149	79597
6.6	216.65	7.94	1	0.010269	-0.010571	0.009935	0.07673	101387	1.76	114	776	0	81	2256	1159	1883	37576	0	6053	1013	289	4679	389612	0	270	1274	825	57	0	0	111	757	385	3461	26	97	52	302	528	100	1552	378	2370	1492	3252	61396	18908	0.15	80304
6.7	217.65	7.94	1	0.010269	-0.010571	0.009935	0.07673	101064	1.85	108	864	0	121	2163	1094	1902	38371	4	5848	998	274	4626	385217	100	317	1272	717	134	0	52	0	906	398	3261	139	141	74	128	684	28	1664	237	2226	1450	2419	62326	19794	0.15	82120
6.8	218.65	7.94	1	0.010269	-0.010571	0.009935	0.07673	102823	1.88	116	887	0	106	2256	1121	2020	37717	95	6001	1051	295	4868	394568	0	298	1370	795	0	38	0	164	950	317	3432	13	149	62	191	566	169	1430	148	2560	1549	2861	62756	19909	0.151	82665
6.9	219.65	7.93	1	0.010269	-0.010571	0.009935	0.07673	101757	1.93	101	736	0	105	2510	1133	1930	35873	71	5784	1023	281	4686	390529	0	291	1372	784	144	0	0	63	972	293	3243	0	97	73	164	571	254	1603	446	2397	1511	2889	60447	19325	0.15	79772
7	220.65	7.92	1	0.010269	-0.010571	0.009935	0.07673	100003	1.77	122	659	0	107	2728	1145	1778	35165	36	5818	952	286	4490	386900	0	250	1268	672	29	155	24	74	945	453	3209	122	156	0	291	613	93	1609	362	2287	1499	3420	59283	19084	0.147	78367
7.1	221.65	7.92	1	0.010269	-0.010571	0.009935	0.07673	98424	1.84	53	687	0	84	2550	1126	1825	35045	0	5941	892	232	4606	383930	0	216	1248	711	138	0	89	60	904	252	3351	58	9	88	231	674	0	1504	531	2381	1428	3175	56939	19218	0.146	76157
7.2	222.65	7.92	1	0.010269	-0.010571	0.009935	0.07673	100179	1.85	68	877	0	70	2273	1071	1959	35947	0	6187	988	286	4528	394586	0	260	1284	839	100	4	0	104	892	0	3478	86	72	0	205	615	84	1557	838	2460	1403	2435	57477	18875	0.146	76352
7.3	223.65	7.92	1	0.010269	-0.010571	0.009935	0.07673	99763	1.89	105	923	0	128	2514	1035	1929	35447	39	5861	1111	333	4657	392446	36	191	1319	696	134	0	0	112	883	155	3349	130	134	67	212	760	182	1429	392	2370	1570	2776	56446	18775	0.146	75221
7.4	224.65	7.92	1	0.010269	-0.010571	0.009935	0.07673	99775	1.81	93	804	0	105	2294	1138	1949	36104	40	6146	1048	217	4842	393941	0	321	1456	648	60	0	0	0	815	433	3250	0	68	23	157	658	118	1561	210	2418	1306	3246	56290	18807	0.146	75097
7.5	225.65	7.93	1	0.010269	-0.010571	0.009935	0.07673	99456	1.73	136	829	0	103	2349	1086	1879	36306	47	6010	981	194	4746	390760	239	247	1172	848	152	52	147	110	913	306	3216	0	234	73	291	699	14	1337	221	2261	1460	2087	56760	19226	0.146	75986
7.6	226.65	7.93	1	0.010269	-0.010571	0.009935	0.07673	98189	1.85	61	784	0	99	2475	1118	1830	35486	0	5910	979	305	4749	383303	0	266	1244	780	118	68	80	91	881	0	3482	14	80	38	262	678	28	1423	648	2411	1602	3109	56857	18884	0.145	75741
7.7	227.65	7.93	1	0.010269	-0.010571	0.009935	0.07673	97010	1.82	129	742	0	132	2389	1097	1870	35986	89	5856	951	267	4585	378663	349	203	1209	763	165	0	93	225	963	141	3187	12	13	93	341	663	30	1580	439	2166	1346	2420	56366	18953	0.144	75319
7.8	228.65	7.94	1	0.010269	-0.010571	0.009935	0.07673	97558	1.86	63	870	0	65	2034	1102	1872	38142	8	6055	1043	234	4857	384932	0	286	1427	840	263	12	25	84	808	343	3472	88	113	15	246	679	82	1349	516	2409	1540	2944	55554	18876	0.144	74430
7.9	229.65	7.95	1	0.010269	-0.010571	0.009935	0.07673	97297	2.01	105	842	0	103	2062	1208	1951	37879	37	6044	978	270	4694	383783	179	230	1337	744	89	0	30	144	731	176	3509	147	158	98	247	572	81	1232	317	2338	1466	2366	55266	18618	0.144	73884
8	230.65	7.95	1	0.010269	-0.010571	0.009935	0.07673	97061	1.93	90	828	0	89	2101	1210	1821	37655	20	6022	1149	270	4832	383421	0	270	1342	862	95	15	28	76	764	270	3398	0	214	42	215	627	162	1334	245	2355	1478	2497	55125	18562	0.144	73687
8.1	231.65	7.95	1	0.010269	-0.010571	0.009935	0.07673	96775	1.83	91	810	0	92	2158	1165	1957	38076	33	6071	952	306	4716	382523	0	252	1220	818	113	0	0	14	831	220	3362	156	314	47	176	599	146	1607	593	2340	1367	2676	54691	18831	0.143	73522
8.2	232.65	7.95	1	0.010269	-0.010571	0.009935	0.07673	96850	1.95	125	845	0	94	2194	1192	1929	38128	69	6056	1043	315	4769	382155	0	276	1260	694	72	0	0	0	717	147	3369	22	127	38	319	601	0	1578	588	2221	1411	3063	55073	18832	0.143	73905
8.3	233.65	7.94	1	0.010269	-0.010571	0.009935	0.07673	97258	1.79	114	867	0	111	2249	1146	1843	39204	22	6125	901	259	4816	383794	49	254	1353	907	66	0	0	130	839	105	3439	0	80	33	231	586	0	1543	714	2397	1325	2558	55232	18896	0.143	74128
8.4	234.65	7.94	1	0.010269	-0.010571	0.009935	0.07673	97424	1.71	110	819	0	93	2442	1127	1831	39107	38	6004	1040	238	4851	384532	0	245	1201	774	30	0	0	0	769	244	3473	117	0	0	293	604	184	1683	382	2290	1406	3040	55245	19012	0.143	74257
8.5	235.65	7.93	1	0.010269	-0.010571	0.009935	0.07673	97999	1.75	99	762	0	45	2291	1145	1798	40004	46	6003	955	287	5086	387661	0	323	1271	769	164	0	101	34	675	122	3554	94	97	69	277	614	20	1497	736	2357	1426	3072	55081	18939	0.143	74020
8.6	236.65	7.93	1	0.010269	-0.010571	0.009935	0.07673	99855	1.83	76	840	0	111	2434	1113	1869	41210	82	6154	1056	254	5017	395555	0	297	1337	729	184	0	0	147	737	266	3554	0	47	74	204	668	43	1571	409	2447	1487	3029	55094	19200	0.145	74294
8.7	237.65	7.92	1	0.010269	-0.010571	0.009935	0.07673	100154	2.03	126	841	0	101	2452	1082	1883	41595	55	6272	1069	296	5090	397769	101	279	1350	788	155	39	65	0	829	347	3484	76	51	60	273	717	93	1556	257	2264	1462	2865	55274	19376	0.145	74650
8.8	238.65	7.92	1	0.010269	-0.010571	0.009935	0.07673	99550	1.79	54	841	0	74	2474	1044	1843	42012	0	6286	1034	187	5251	393960	0	231	1419	807	181	0	0	95	754	258	3563	97	150	46	172	608	174	1332	597	2363	1483	2980	54795	19463	0.145	74258
8.9	239.65	7.91	1	0.010269	-0.010571	0.009935	0.07673	100348	1.84	112	871	0	111	2499	1021	1818	41379	42	6318	1009	315	6503	397953	20	173	1416	849	192	0	0	99	776	230	3346	19	211	30	139	714	83	1547	278	2306	1436	2972	54738	19251	0.145	73989
9	240.65	7.91	1	0.010269	-0.010571	0.009935	0.07673	100499	1.87	104	872	0	131	2501	997	1842	41834	11	6488	1024	343	5107	402282	0	245	1484	798	168	0	0	141	752	268	3437	67	149	0	75	660	167	1495	324	2278	1578	3313	53980	18966	0.144	72946
9.1	241.65	7.91	1	0.010269	-0.010571	0.009935	0.07673	101836	1.97	135	935	0	106	2349	1072	1990	42910	20	6463	979	410	5121	410194	10	260	1366	773	242	0	151	189	715	216	3611	76	123	86	271	737	0	1576	295	2556	1540	2735	54382	18967	0.145	73349
9.2	242.65	7.9	1	0.010269	-0.010571	0.009935	0.07673	103256	1.99	121	989	0	106	2444	984	1963	44497	0	6742	1088	294	5484	414900	255	230	1450	982	256	19	97	26	737	355	3687	0	0	39	186	711	0	1488	491	2367	1622	2533	54556	19527	0.146	74083
9.3	243.65	7.91	1	0.010269	-0.010571	0.009935	0.07673	99480	1.81	114	835	0	101	2369	1026	1848	42105	35	6218	1002	235	5046	397188	0	200	1359	899	89	0	0	121	735	183	3480	0	212	74	294	690	124	1552	325	2379	1494	2862	53979	18952	0.144	72931
9.4	244.65	7.9	1	0.010269	-0.010571	0.009935	0.07673	101592	1.92	97	792	0	97	2727	966	1763	43295	0	6259	1116	234	5106	403957	0	241	1376	850	49	0	19	42	860	231	3443	149	157	98	245	662	0	1661	764	2629	1428	2616	55115	19495	0.146	74610
9.5	245.65	7.9	1	0.010269	-0.010571	0.009935	0.07673	98367	1.92	77	787	0	112	2672	1109	1692	42044	83	6174	999	279	5031	386479	0	202	1322	916	120	0	0	95	842	148	3087	86	127	30	199	613	146	1500	519	2545	1456	2588	54951	19058	0.145	74009
9.6	246.65	7.88	1	0.010269	-0.010571	0.009935	0.07673	102757	1.88	66	767	0	77	2778	1024	1781	45833	27	6408	1160	262	5191	406520	0	286	1506	804	196	65	0	0	847	288	3439	0	94	91	213	650	79	1550	446	2500	1451	2975	55664	19221	0.147	74885
9.7	247.65	7.88	1	0.010269	-0.010571	0.009935	0.07673	98770	1.93	113	690	0	112	2879	1026	1698	42601	67	6186	1023	272	5080	388562	106	262	1269	778	112	0	0	24	948	94	3071	0	0	44	358	655	32	1363	455	2261	1447	2704	54593	19065	0.144	73658
9.8	248.65	7.88	1	0.010269	-0.010571	0.009935	0.07673	95329	1.68	105	592	0	95	3236	1033	1550	37859	37	5742	962	301	4737	369408	344	237	1273	724	37	0	0	0	877	216	3171	0	97	82	280	678	234	1308	226	2196	1387	2255	54359	18792	0.143	73151
9.9	249.65	7.9	1	0.010269	-0.010571	0.009935	0.07673	95981	1.8	117	631	0	116	3177	1050	1665	39191	51	5673	843	252	5017	374280	114	212	1199	752	131	0	0	0	830	498	3314	35	129	91	306	666	107	1243	217	2008	1397	2690	54965	19160	0.142	74125
10	250.65	7.88	1	0.010269	-0.010571	0.009935	0.07673	99673	1.9	88	683	0	81	3080	989	1673	42375	115	6190	987	367	5086	395030	0	221	1295	759	149	0	159	0	757	226	3309	104	202	43	223	641	0	1449	445	2273	1565	3095	54959	19439	0.144	74398
10.1	251.65	7.89	1	0.010269	-0.010571	0.009935	0.07673	97004	1.77	61	653	0	97	3013	1102	1610	40903	17	5791	931	307	5036	383023	37	232	1373	760	183	17	259	59	943	0	3528	166	63	88	178	743	0	1470	839	2124	1447	2695	53997	18637	0.142	72634
10.2	252.65	7.89	1	0.010269	-0.010571	0.009935	0.07673	97730	1.85	90	638	0	81	2864	1039	1673	41998	23	6086	1057	298	5067	390999	0	191	1249	785	75	0	0	59	828	162	3324	0	256	81	295	688	109	1416	380	2643	1444	3184	52597	18660	0.142	71257
10.3	253.65	7.9	1	0.010269	-0.010571	0.009935	0.07673	97643	1.71	82	644	0	98	2959	1003	1673	41376	0	6057	959	270	5133	387557	0	233	1276	784	13	9	88	89	768	72	3487	116	51	95	316	595	54	1551	712	2316	1430	2876	53851	18834	0.143	72685
10.4	254.65	7.9	1	0.010269	-0.010571	0.009935	0.07673	97813	1.79	91	613	0	71	2990	1047	1697	41238	0	5949	909	330	5097	388411	0	306	1340	754	204	26	0	18	727	162	3592	0	123	159	219	654	118	1335	591	2313	1556	2815	54050	19039	0.142	73089
10.5	255.65	7.9	1	0.010269	-0.010571	0.009935	0.07673	97051	1.86	100	551	21	87	3067	1017	1656	40769	58	5829	993	350	5075	383800	32	266	1381	851	89	0	0	0	709	218	3290	82	260	45	290	700	161	1284	308	2408	1453	2567	53028	19010	0.142	72038
10.6	256.65	7.91	1	0.010269	-0.010571	0.009935	0.07673	97652	1.8	87	550	0	73	3066	1033	1633	40804	88	5901	967	286	5201	384157	0	235	1366	750	155	0	0	11	858	195	3381	179	211	72	214	581	0	1460	302	2288	1355	3178	54747	18961	0.143	73708
10.7	257.65	7.91	1	0.010269	-0.010571	0.009935	0.07673	96989	1.77	102	574	0	122	3137	1036	1615	40243	0	5977	958	357	5044	382701	0	237	1333	725	124	111	0	188	815	376	3291	0	40	86	238	642	0	1473	181	2403	1453	2495	53832	19021	0.143	72853
10.8	258.65	7.91	1	0.010269	-0.010571	0.009935	0.07673	94335	1.76	84	504	0	113	3194	1044	1603	38513	79	5717	961	295	4759	368107	0	229	1225	794	0	0	115	145	858	201	3216	58	281	60	319	648	26	1379	226	2165	1314	2873	52694	19065	0.141	71759
10.9	259.65	7.9	1	0.010269	-0.010571	0.009935	0.07673	95991	1.71	76	590	0	97	3336	1087	1535	38592	61	5794	1033	267	4798	376814	0	231	1275	832	242	0	187	299	857	0	3485	176	282	12	262	647	0	1672	915	2153	1454	3572	53325	18992	0.142	72317
11	260.65	7.91	1	0.010269	-0.010571	0.009935	0.07673	97104	1.75	46	591	0	123	3280	1095	1544	39601	98	5868	985	293	5078	378196	0	239	1204	752	121	74	0	36	735	188	3341	19	43	80	359	632	32	1516	473	2265	1374	2894	54869	19495	0.143	74364
11.1	261.65	7.9	1	0.010269	-0.010571	0.009935	0.07673	96601	1.86	89	565	0	88	3228	1040	1618	39672	38	5826	1042	330	4949	379017	0	187	1318	697	231	0	164	16	745	291	3279	0	0	56	112	677	0	1423	156	2286	1551	3041	54296	18834	0.142	73130
11.2	262.65	7.91	1	0.010269	-0.010571	0.009935	0.07673	94560	1.74	76	550	0	83	2921	1090	1549	39454	40	5799	1041	230	4826	370122	0	234	1326	822	132	143	0	135	742	269	3406	7	143	29	249	617	167	1153	358	2459	1319	2645	52507	18650	0.141	71157
11.3	263.65	7.9	1	0.010269	-0.010571	0.009935	0.07673	97771	1.84	76	662	0	117	3105	1082	1731	41142	63	6181	989	285	5266	386388	0	259	1355	864	137	13	127	102	769	205	3533	26	115	41	251	681	54	1479	635	2488	1342	3747	53442	19105	0.143	72547
11.4	264.65	7.91	1	0.010269	-0.010571	0.009935	0.07673	96350	1.83	72	610	0	75	2997	1108	1692	40796	147	5880	954	208	5017	380817	0	238	1270	782	101	115	0	148	792	280	3307	42	241	75	269	629	262	1326	345	2262	1377	3186	53112	18865	0.142	71977
11.5	265.65	7.91	1	0.010269	-0.010571	0.009935	0.07673	96764	1.82	84	675	0	51	2836	1133	1711	41643	42	5979	936	271	4971	383030	122	242	1347	794	129	90	10	148	708	252	3490	0	159	42	227	692	37	1483	304	2185	1398	2443	53088	18948	0.142	72036
11.6	266.65	7.91	1	0.010269	-0.010571	0.009935	0.07673	98628	1.88	91	676	0	93	2851	1043	1730	41951	32	6191	913	255	5029	391749	0	218	1223	790	112	52	127	46	723	382	3522	0	180	48	251	704	0	1667	84	2156	1392	2992	53126	19271	0.143	72397
11.7	267.65	7.91	1	0.010269	-0.010571	0.009935	0.07673	96107	1.85	105	630	0	102	3059	1062	1608	39886	29	5974	963	321	4984	378522	425	206	1351	763	111	50	0	0	781	59	3350	0	105	41	229	685	154	1329	691	2241	1480	2017	53741	18945	0.142	72686
11.8	268.65	7.9	1	0.010269	-0.010571	0.009935	0.07673	97421	1.74	107	673	0	69	3035	1109	1672	40924	103	6068	1003	293	5119	383701	0	290	1399	916	186	47	0	206	867	185	3401	0	151	57	209	608	42	1549	484	2359	1514	2801	53653	19166	0.143	72819
11.9	269.65	7.91	1	0.010269	-0.010571	0.009935	0.07673	96758	1.77	81	683	0	45	2880	1046	1555	41208	0	5947	958	264	5056	380179	0	265	1318	897	71	129	75	90	914	177	3315	208	86	46	269	661	25	1484	429	2306	1483	2487	54128	18909	0.143	73037
12	270.65	7.9	1	0.010269	-0.010571	0.009935	0.07673	95561	1.86	132	718	0	100	2785	1125	1725	41026	98	5970	934	285	4760	376913	0	224	1274	730	85	20	36	81	712	377	3294	0	100	26	223	582	29	1227	406	2197	1520	2912	53229	18934	0.142	72163
12.1	271.65	7.9	1	0.010269	-0.010571	0.009935	0.07673	95832	1.81	104	669	0	94	2912	1111	1655	39848	95	6011	949	167	4989	378000	37	181	1291	693	95	0	0	236	817	165	3341	61	112	6	303	512	84	1463	623	2433	1395	2454	53472	18859	0.141	72331
12.2	272.65	7.89	1	0.010269	-0.010571	0.009935	0.07673	98012	1.91	90	705	0	119	3000	1114	1599	41263	4	6000	1011	279	5105	387477	0	239	1356	828	127	26	0	110	766	22	3303	166	0	47	188	655	115	1284	608	2306	1506	3145	54245	18799	0.143	73044
12.3	273.65	7.91	1	0.010269	-0.010571	0.009935	0.07673	95055	1.84	75	640	0	93	2738	1159	1633	40670	28	5914	901	287	5015	373067	0	247	1390	754	78	0	9	95	681	224	3324	120	194	96	135	684	69	1593	259	2300	1475	3074	52732	18542	0.142	71274
12.4	274.65	7.91	1	0.010269	-0.010571	0.009935	0.07673	95121	1.78	95	684	0	55	2683	1161	1688	40336	97	5764	1005	320	4817	374694	0	240	1298	757	105	0	0	102	690	393	3361	41	0	92	189	614	7	1504	207	2256	1452	3069	53368	19000	0.141	72368
12.5	275.65	7.89	1	0.010269	-0.010571	0.009935	0.07673	99098	1.84	98	660	0	81	2932	1051	1781	41486	17	6223	960	287	5016	391708	0	264	1314	777	126	53	170	76	794	254	3384	4	137	15	263	570	0	1739	524	2476	1463	2905	55005	19398	0.144	74403
12.6	276.65	7.89	1	0.010269	-0.010571	0.009935	0.07673	96340	1.82	99	678	0	80	2801	1087	1770	40208	14	5987	1016	205	4876	378288	244	180	1245	828	144	26	137	264	852	198	3238	103	98	10	334	580	0	1712	492	2350	1542	2180	54040	19102	0.143	73142
12.7	277.65	7.9	1	0.010269	-0.010571	0.009935	0.07673	96704	1.79	74	636	0	88	2818	1128	1674	40578	12	6230	897	275	4798	380191	0	243	1265	766	74	0	0	163	812	368	3394	58	306	0	331	653	78	1643	347	2428	1244	2561	54097	19091	0.143	73188
12.8	278.65	7.89	1	0.010269	-0.010571	0.009935	0.07673	93578	1.77	123	711	0	87	2774	1105	1611	39820	122	5592	951	243	4852	364833	0	235	1249	786	127	34	134	98	858	238	3201	49	191	53	104	657	26	1365	274	2250	1373	2557	53471	18645	0.141	72116
12.9	279.65	7.9	1	0.010269	-0.010571	0.009935	0.07673	93863	1.88	62	658	0	87	2725	1193	1588	38188	0	5802	1019	235	4899	365212	0	233	1179	764	136	23	0	24	724	195	3346	111	202	0	274	595	168	1422	416	2342	1305	2667	53830	18738	0.142	72568
13	280.65	7.89	1	0.010269	-0.010571	0.009935	0.07673	94980	1.87	101	686	0	97	2640	1065	1694	39449	42	5802	923	239	4737	371328	30	186	1209	774	63	0	0	15	842	296	3081	36	223	34	307	640	141	1242	265	2265	1297	2540	54601	18977	0.142	73578
13.1	281.65	7.88	1	0.010269	-0.010571	0.009935	0.07673	95110	1.83	89	696	0	113	2693	1139	1672	39955	0	5798	989	220	4819	371669	0	325	1278	765	153	0	0	119	827	294	3241	0	17	96	181	654	224	1396	313	2342	1389	2638	54280	18929	0.142	73209
13.2	282.65	7.88	1	0.010269	-0.010571	0.009935	0.07673	94325	1.87	105	723	0	95	2813	1184	1666	39369	71	5796	929	242	4780	368559	0	273	1337	836	116	0	116	116	786	250	3159	111	155	29	350	609	50	1211	403	2215	1475	2722	54287	18824	0.141	73111
13.3	283.65	7.87	1	0.010269	-0.010571	0.009935	0.07673	97806	1.81	154	661	0	77	3038	1091	1696	41218	30	5947	1110	305	5006	382263	118	252	1241	776	51	0	55	184	722	142	3333	0	74	39	239	755	0	1628	227	2426	1387	1981	55796	19104	0.144	74900
13.4	284.65	7.88	1	0.010269	-0.010571	0.009935	0.07673	92419	1.7	104	679	0	109	2643	1125	1559	37658	17	5529	975	334	4711	359353	0	292	1227	672	124	0	0	0	708	278	3328	57	126	66	204	625	68	1451	449	2073	1360	2546	53542	18601	0.141	72143
13.5	285.65	7.85	1	0.010269	-0.010571	0.009935	0.07673	96112	1.8	82	565	0	114	3241	1112	1608	38491	45	5772	864	317	5049	373313	190	297	1313	773	151	0	99	0	676	254	3354	8	104	42	200	740	39	1331	407	2039	1381	2649	54576	19067	0.144	73643
13.6	286.65	7.86	1	0.010269	-0.010571	0.009935	0.07673	95092	1.65	87	547	0	91	3147	1040	1608	38473	57	5915	899	343	4782	370755	324	208	1235	706	94	0	0	89	901	118	3190	113	141	23	291	658	0	1324	560	2073	1375	2247	54070	19141	0.142	73211
13.7	287.65	7.88	1	0.010269	-0.010571	0.009935	0.07673	91143	1.87	90	569	5	115	2653	1204	1581	37775	0	5569	840	228	4591	353516	0	234	1164	730	174	0	0	108	749	191	3223	72	139	75	267	576	149	1234	333	2376	1359	3195	53599	18454	0.14	72053
13.8	288.65	7.89	1	0.010269	-0.010571	0.009935	0.07673	93181	1.75	81	546	0	106	2632	1120	1514	37866	0	5748	899	247	4714	360547	0	237	1220	650	71	0	0	90	779	243	3258	31	118	70	262	664	182	1129	382	2003	1317	2769	54578	18930	0.142	73508
13.9	289.65	7.88	1	0.010269	-0.010571	0.009935	0.07673	97677	1.91	84	602	0	130	2951	1178	1547	38970	39	5701	1057	262	4828	374344	0	218	1351	796	106	0	0	0	834	25	3572	81	68	108	90	683	91	1419	711	1904	1423	3331	58367	19620	0.146	77987
14	290.65	7.85	1	0.010269	-0.010571	0.009935	0.07673	99468	1.85	98	608	0	98	3330	1120	1684	39482	39	6029	975	308	5044	386183	118	301	1362	779	126	16	0	45	795	362	3436	0	187	59	214	757	119	1330	111	2186	1434	2669	56773	19581	0.146	76354
14.1	291.65	7.86	1	0.010269	-0.010571	0.009935	0.07673	82328	1.57	91	409	0	79	2932	1204	1278	29177	11	4527	704	210	3821	305338	0	204	1031	668	32	0	0	150	816	314	3115	0	150	0	275	567	77	925	163	1910	1155	2895	52615	17802	0.137	70417
14.2	292.65	7.85	1	0.010269	-0.010571	0.009935	0.07673	92954	1.7	94	555	0	90	3043	1089	1592	36635	27	5459	907	288	4760	358493	0	225	1269	806	96	47	0	44	761	287	3169	0	0	0	257	556	159	1239	282	2106	1437	2736	54837	19047	0.142	73884
14.3	293.65	7.86	1	0.010269	-0.010571	0.009935	0.07673	94946	1.73	97	644	0	120	2575	1078	1690	38948	0	5837	879	285	4816	371368	360	213	1186	696	117	0	5	14	635	126	3456	138	219	34	166	659	63	1306	594	2013	1442	2351	54351	18987	0.142	73338
14.4	294.65	7.86	1	0.010269	-0.010571	0.009935	0.07673	94003	1.81	68	643	0	116	2473	1129	1715	39079	0	5701	963	269	4812	368940	0	267	1274	749	103	0	0	54	753	57	3523	36	36	55	185	608	75	1382	676	2236	1458	2941	53475	18970	0.141	72445
14.5	295.65	7.87	1	0.010269	-0.010571	0.009935	0.07673	93804	1.68	151	738	0	72	2314	1156	1687	38769	27	5762	973	266	4877	370317	220	243	1297	786	131	0	0	43	700	235	3617	0	93	26	140	744	170	1109	289	2214	1373	2460	53221	18316	0.141	71537
14.6	296.65	7.89	1	0.010269	-0.010571	0.009935	0.07673	93387	1.82	85	765	0	74	2110	1206	1714	38778	0	5787	983	263	5004	368949	0	219	1239	709	8	59	0	66	785	380	3485	23	0	98	227	556	116	1345	96	2450	1335	3003	54061	18265	0.14	72326
14.7	297.65	7.89	1	0.010269	-0.010571	0.009935	0.07673	91874	1.67	114	765	0	99	2157	1242	1707	37572	54	5740	946	232	4875	362035	78	228	1199	792	150	58	35	104	657	313	3408	102	203	18	79	538	118	1153	308	1930	1357	2747	53056	18776	0.14	71832
14.8	298.65	7.9	1	0.010269	-0.010571	0.009935	0.07673	91463	1.8	124	749	0	82	2152	1139	1689	38140	0	5563	974	294	4771	362197	55	256	1222	743	158	0	0	30	796	167	3368	37	98	30	202	601	65	1356	167	2247	1381	2451	51497	18512	0.139	70009
14.9	299.65	7.9	1	0.010269	-0.010571	0.009935	0.07673	89221	1.71	89	671	0	82	2136	1205	1568	36506	49	5398	905	239	4815	350437	319	289	1262	745	61	0	0	69	603	280	3209	0	191	68	185	658	10	1267	146	2000	1413	2234	51531	18244	0.138	69775
15	300.65	7.91	1	0.010269	-0.010571	0.009935	0.07673	90309	1.64	73	670	0	80	2105	1207	1609	37844	65	5728	908	266	4635	356098	173	234	1195	763	82	0	0	160	724	102	3316	72	129	0	198	688	84	1358	602	2141	1321	2153	51273	18009	0.138	69282
15.1	301.65	7.93	1	0.010269	-0.010571	0.009935	0.07673	87352	1.64	114	739	0	70	1956	1226	1594	36839	0	5404	831	228	4514	343320	285	245	1268	652	114	0	0	55	714	312	3315	0	0	71	270	642	149	1067	125	1677	1291	2357	51319	17959	0.136	69278
15.2	302.65	7.93	1	0.010269	-0.010571	0.009935	0.07673	87287	1.77	81	655	0	63	1996	1301	1477	36829	89	5315	869	282	4532	342586	0	235	1275	599	31	0	0	18	642	137	3279	93	0	73	161	541	40	1283	498	2034	1279	3166	51835	18006	0.137	69841
15.3	303.65	7.94	1	0.010269	-0.010571	0.009935	0.07673	86971	1.72	120	734	0	75	1911	1237	1568	37290	50	5356	764	318	4482	340963	0	209	1154	683	73	0	0	0	654	161	3378	48	0	50	228	516	150	1311	401	2134	1099	2401	50514	18258	0.137	68772
15.4	304.65	7.95	1	0.010269	-0.010571	0.009935	0.07673	85321	1.84	103	658	0	72	1916	1286	1512	35378	52	4986	897	273	4353	332326	0	227	1180	687	31	0	0	132	638	269	3286	0	209	89	187	494	66	1207	122	2005	1283	2997	50448	17880	0.136	68328
15.5	305.65	7.96	1	0.010269	-0.010571	0.009935	0.07673	85023	1.61	67	678	0	59	1888	1278	1634	35970	45	5012	854	267	4277	331766	0	334	1176	642	163	29	14	119	637	179	3338	79	76	87	117	498	46	1033	270	2112	1321	2756	49857	17665	0.135	67522
15.6	306.65	7.97	1	0.010269	-0.010571	0.009935	0.07673	84858	1.64	99	653	0	59	1727	1312	1492	35427	62	4900	798	231	4405	331080	0	190	1060	712	23	0	0	0	598	204	3267	238	135	123	195	494	269	1189	242	1949	1229	2435	50783	17690	0.135	68473
15.7	307.65	7.98	1	0.010269	-0.010571	0.009935	0.07673	84587	1.65	104	690	0	88	1789	1328	1410	35465	0	5025	826	193	4261	329069	15	256	1086	678	118	0	0	135	545	285	3088	108	88	82	161	513	298	955	316	1888	1096	2724	50327	17601	0.136	67928
15.8	308.65	7.98	1	0.010269	-0.010571	0.009935	0.07673	84465	1.68	112	687	0	99	1863	1273	1430	35204	66	5135	920	226	4251	329513	0	250	1115	693	48	28	0	23	544	142	3270	0	0	31	168	464	61	926	365	1988	1224	2530	49857	17455	0.135	67312
15.9	309.65	7.98	1	0.010269	-0.010571	0.009935	0.07673	84824	1.72	89	622	0	104	1890	1269	1527	36013	0	5014	844	257	4404	331521	0	220	1076	645	69	0	0	36	612	340	3064	115	109	38	133	491	152	913	65	1964	1368	3360	49445	17455	0.135	66900
16	310.65	7.98	1	0.010269	-0.010571	0.009935	0.07673	84964	1.8	121	718	0	95	1865	1317	1555	36253	69	5146	873	236	4413	332722	0	218	1138	782	9	0	41	145	642	73	3210	74	149	29	267	635	21	1297	544	2005	1313	2686	50091	17525	0.135	67616
16.1	311.65	7.98	1	0.010269	-0.010571	0.009935	0.07673	86352	1.75	95	669	0	74	1981	1266	1550	36208	60	5232	860	260	4507	340281	0	306	1145	694	109	24	0	90	681	66	3188	101	25	53	222	518	151	1178	674	2179	1204	3327	49754	17741	0.136	67495
16.2	312.65	7.99	1	0.010269	-0.010571	0.009935	0.07673	86142	1.72	75	629	0	56	1883	1242	1450	36141	40	5262	889	216	4411	338513	0	285	1071	731	10	0	0	60	652	351	3300	76	0	5	251	570	101	1411	179	1862	1161	3253	50763	17754	0.136	68517
16.3	313.65	7.98	1	0.010269	-0.010571	0.009935	0.07673	88016	1.76	70	692	0	43	1988	1210	1523	37467	19	5288	897	277	4579	348448	0	172	1320	875	120	0	0	104	598	350	3147	9	57	48	164	548	129	1051	0	2044	1419	3451	50162	17964	0.136	68126
16.4	314.65	7.98	1	0.010269	-0.010571	0.009935	0.07673	86589	1.69	46	647	0	57	2005	1361	1562	36466	10	5193	873	271	4452	339443	0	196	1084	647	186	0	0	69	623	74	3294	0	67	78	158	598	90	1103	454	1823	1442	3218	50294	17886	0.136	68180
16.5	315.65	7.98	1	0.010269	-0.010571	0.009935	0.07673	88498	1.75	102	733	0	90	1970	1224	1590	36942	45	5305	852	225	4798	350034	0	200	1137	646	109	0	0	228	716	231	3076	30	190	113	225	570	183	1404	250	2175	1276	2682	50063	17930	0.136	67993
16.6	316.65	7.98	1	0.010269	-0.010571	0.009935	0.07673	89051	1.82	124	754	0	51	2105	1208	1550	37904	42	5503	960	270	4625	352779	0	288	1224	661	113	0	0	100	636	43	3143	46	0	12	264	538	152	1244	553	2285	1204	2377	50229	17822	0.137	68051
16.7	317.65	7.99	1	0.010269	-0.010571	0.009935	0.07673	88476	1.77	94	712	0	48	1994	1197	1548	37567	11	5341	848	229	4628	350159	0	258	1194	766	171	0	177	207	615	217	3252	62	51	34	121	611	0	1340	266	2163	1308	2905	49581	18121	0.137	67702
16.8	318.65	7.99	1	0.010269	-0.010571	0.009935	0.07673	88489	1.75	57	702	0	88	2076	1257	1567	37888	55	5395	937	276	4592	350262	0	319	1144	659	104	0	0	99	563	219	3262	144	105	62	134	660	170	1114	579	1982	1245	2617	50458	18095	0.136	68553
16.9	319.65	8	1	0.010269	-0.010571	0.009935	0.07673	88243	1.61	109	753	0	84	1994	1217	1670	37754	0	5314	1004	233	4635	348653	0	213	1150	749	38	0	0	100	652	200	3316	0	242	42	224	601	139	1123	324	2039	1257	2687	49932	17505	0.136	67437
17	320.65	7.99	1	0.010269	-0.010571	0.009935	0.07673	89518	1.69	90	777	0	65	1912	1237	1608	38478	83	5538	893	230	4662	354410	0	233	1309	723	154	0	0	0	639	378	3295	0	107	15	224	673	190	1182	96	2041	1484	2808	50606	18223	0.137	68829
17.1	321.65	7.99	1	0.010269	-0.010571	0.009935	0.07673	90872	1.77	91	739	0	48	1933	1234	1688	39366	11	5645	809	216	4647	357697	0	273	1227	748	132	0	0	59	628	333	3595	0	163	72	147	525	84	1180	328	2138	1328	2795	51606	18319	0.139	69925
17.2	322.65	8	1	0.010269	-0.010571	0.009935	0.07673	87543	1.71	106	763	0	60	2065	1201	1631	37019	42	5425	846	258	4418	341909	0	261	1110	657	149	0	25	65	576	312	3385	150	13	60	217	596	0	1256	178	1891	1247	2562	51648	17764	0.137	69412
17.3	323.65	8	1	0.010269	-0.010571	0.009935	0.07673	89234	1.7	130	812	0	81	2059	1264	1666	38053	0	5520	914	250	4729	351278	213	206	1134	697	82	0	0	69	618	67	3427	6	88	8	250	516	97	1135	434	1830	1513	2541	51356	18181	0.137	69537
17.4	324.65	8	1	0.010269	-0.010571	0.009935	0.07673	88340	1.68	61	744	0	66	2056	1188	1560	37201	109	5337	879	229	4709	346190	37	289	1253	809	105	55	0	0	780	397	3265	0	27	57	198	577	174	1258	174	2034	1339	2751	51242	17886	0.137	69128
17.5	325.65	8.01	1	0.010269	-0.010571	0.009935	0.07673	88779	1.71	63	636	0	12	2224	1194	1566	37229	63	5394	945	307	4621	348215	159	190	1278	745	177	0	0	0	690	38	3265	5	18	56	79	652	94	1190	538	1981	1430	2475	50770	18019	0.137	68789
17.6	326.65	8.01	1	0.010269	-0.010571	0.009935	0.07673	88972	1.7	51	698	0	76	2144	1217	1547	36881	22	5414	884	272	4648	350293	0	287	1236	738	93	86	0	73	683	288	3189	182	189	62	199	618	164	1297	354	2066	1376	2861	51115	17981	0.137	69096
17.7	327.65	8.01	1	0.010269	-0.010571	0.009935	0.07673	88319	1.61	94	714	0	73	2236	1260	1569	36342	0	5113	863	263	4579	347539	0	200	1083	700	171	0	0	121	661	356	3274	0	72	97	188	643	97	1155	255	1921	1308	2725	50837	18066	0.137	68903
17.8	328.65	8.01	1	0.010269	-0.010571	0.009935	0.07673	88183	1.78	99	594	0	97	2220	1246	1564	36146	59	5222	943	289	4549	346354	0	223	1155	744	82	0	0	8	758	185	3374	15	0	31	240	564	267	1211	534	2161	1323	3018	51483	18271	0.137	69754
17.9	329.65	8.01	1	0.010269	-0.010571	0.009935	0.07673	89472	1.74	119	688	17	86	2303	1176	1522	37381	134	5492	966	236	4556	352491	0	237	1161	692	152	0	0	109	753	123	3293	108	82	42	159	593	64	1205	540	2119	1339	3241	51457	18327	0.138	69784
18	330.65	8.02	1	0.010269	-0.010571	0.009935	0.07673	89411	1.76	107	697	0	79	2082	1221	1589	37662	30	5338	901	262	4522	352081	42	265	1239	763	87	0	0	104	629	247	3366	110	126	38	96	607	51	1131	514	2014	1327	2638	50335	17924	0.137	68259
18.1	331.65	8.02	1	0.010269	-0.010571	0.009935	0.07673	89109	1.68	72	733	0	64	2220	1141	1578	37192	57	5166	929	193	4572	350714	0	235	1159	769	150	35	45	0	639	159	3364	88	6	83	118	450	54	1233	249	2045	1414	2752	51556	17737	0.137	69293
18.2	332.65	8.02	1	0.010269	-0.010571	0.009935	0.07673	89800	1.79	118	731	0	34	2201	1250	1502	37429	0	5395	919	213	4575	352859	0	190	1231	759	110	0	0	127	690	155	3171	0	113	65	255	552	146	1393	418	2267	1286	3065	51561	18196	0.138	69757
18.3	333.65	8.03	1	0.010269	-0.010571	0.009935	0.07673	88663	1.75	91	691	0	85	2144	1147	1587	36968	20	5360	899	227	4472	349277	86	242	1097	652	116	33	0	108	738	205	3235	106	46	37	223	625	27	1294	238	1948	1265	2380	50704	17928	0.138	68632
18.4	334.65	8.03	1	0.010269	-0.010571	0.009935	0.07673	89729	1.69	73	696	0	82	2145	1228	1532	37149	22	5230	885	280	4763	354428	0	290	1171	762	0	94	0	0	680	112	3295	76	58	52	260	595	18	1125	395	2131	1268	2897	50599	18110	0.138	68709
18.5	335.65	8.04	1	0.010269	-0.010571	0.009935	0.07673	88663	1.65	83	652	0	97	2198	1137	1619	36703	39	5335	821	244	4655	348523	109	259	1295	774	199	0	0	76	633	158	3227	0	201	89	148	550	167	1156	544	2118	1274	2280	50980	18048	0.137	69028
18.6	336.65	8.04	1	0.010269	-0.010571	0.009935	0.07673	89043	1.72	130	753	0	55	2095	1250	1692	37521	7	5268	862	298	4588	351390	0	240	1198	619	0	0	0	82	694	104	3289	89	38	46	222	562	145	1416	519	2110	1359	3272	51297	18399	0.137	69696
18.7	337.65	8.05	1	0.010269	-0.010571	0.009935	0.07673	87244	1.62	99	607	0	70	2228	1204	1531	35832	55	5297	904	236	4392	341304	0	226	1160	611	97	0	0	0	586	291	3094	56	147	26	186	628	115	1126	218	2123	1249	3331	50133	18168	0.136	68301
18.8	338.65	8.05	1	0.010269	-0.010571	0.009935	0.07673	88367	1.71	110	661	0	60	2269	1278	1558	36627	0	5505	841	309	4586	345822	0	229	1146	700	133	0	16	115	690	270	3419	56	76	27	232	656	39	1214	178	1906	1286	3009	51171	17944	0.138	69115
18.9	339.65	8.05	1	0.010269	-0.010571	0.009935	0.07673	89278	1.65	96	700	0	56	2113	1212	1618	37055	102	5342	889	211	4526	351660	0	266	1152	753	103	0	40	179	703	144	3258	0	0	57	214	663	0	1444	425	1964	1449	3275	51820	18063	0.138	69883
19	340.65	8.06	1	0.010269	-0.010571	0.009935	0.07673	89075	1.7	89	696	0	40	2075	1286	1613	36893	70	5390	855	255	4674	350275	299	293	1315	751	173	0	72	101	767	358	3022	158	0	112	165	719	0	1335	369	1830	1441	2499	52670	18219	0.137	70889
19.1	341.65	8.06	1	0.010269	-0.010571	0.009935	0.07673	90181	1.74	91	720	0	91	2175	1232	1567	37386	0	5470	982	219	4584	355243	0	244	1311	775	132	0	0	73	834	110	3226	123	114	84	233	635	0	1408	643	2117	1370	2917	52123	18482	0.138	70605
19.2	342.65	8.06	1	0.010269	-0.010571	0.009935	0.07673	89263	1.77	72	677	0	80	2123	1163	1565	37198	5	5225	944	228	4561	350195	0	258	1208	703	58	47	0	94	686	133	3193	0	151	49	190	681	100	1140	529	2280	1309	2519	51232	17889	0.138	69121
19.3	343.65	8.07	1	0.010269	-0.010571	0.009935	0.07673	88651	1.63	63	695	0	65	2240	1163	1582	36285	60	5244	805	266	4453	346632	121	232	1157	711	128	0	0	0	647	312	3255	39	70	63	211	651	97	1257	321	1775	1344	2742	52025	17926	0.138	69951
19.4	344.65	8.07	1	0.010269	-0.010571	0.009935	0.07673	89232	1.72	105	661	0	54	2221	1275	1518	36246	0	5349	863	312	4502	350636	0	215	1238	720	155	0	0	42	709	364	3218	0	117	11	220	605	90	1086	284	2062	1347	2840	51013	18020	0.138	69033
19.5	345.65	8.07	1	0.010269	-0.010571	0.009935	0.07673	89911	1.78	68	701	0	62	2168	1236	1598	37372	63	5314	874	302	4641	352512	0	231	1220	787	145	0	0	0	711	251	3336	73	157	67	219	595	96	1356	372	2076	1227	3275	52563	18203	0.138	70766
19.6	346.65	8.07	1	0.010269	-0.010571	0.009935	0.07673	89845	1.68	66	727	0	111	2183	1230	1598	37128	69	5304	795	295	4595	352584	0	180	1179	790	177	0	0	129	760	212	3354	74	145	38	195	582	70	1391	451	2218	1390	2894	52889	18216	0.138	71105
19.7	347.65	8.07	1	0.010269	-0.010571	0.009935	0.07673	89976	1.72	105	665	12	94	2142	1236	1563	37003	0	5340	943	243	4572	352093	171	272	1246	736	80	0	59	84	703	168	3214	20	179	16	170	603	0	1205	328	2039	1179	2240	52170	18486	0.139	70656
19.8	348.65	8.07	1	0.010269	-0.010571	0.009935	0.07673	91720	1.77	127	719	0	66	2106	1241	1753	38587	38	5637	1033	276	4771	361549	0	220	1333	880	114	13	0	128	868	270	3419	0	20	19	122	575	109	1377	273	2159	1465	3365	52400	18362	0.14	70762
19.9	349.65	8.07	1	0.010269	-0.010571	0.009935	0.07673	91376	1.75	117	766	0	88	2098	1187	1576	38682	42	5453	947	217	4743	361127	0	171	1043	725	90	0	0	0	673	306	3167	164	197	148	287	657	93	1238	222	2110	1341	3189	52488	18355	0.139	70843
20	350.65	8.07	1	0.010269	-0.010571	0.009935	0.07673	91290	1.79	89	784	0	113	2188	1300	1564	38749	0	5391	956	342	4573	360405	0	277	1137	732	193	0	0	83	708	270	3035	0	50	82	180	518	107	1294	138	2263	1369	3025	51893	18330	0.138	70223
20.1	351.65	8.06	1	0.010269	-0.010571	0.009935	0.07673	93592	1.73	111	758	0	30	2134	1139	1783	40030	0	5755	860	257	4700	370894	0	229	1246	787	91	0	206	7	679	93	3292	76	106	52	254	605	0	1546	474	1966	1442	3104	51890	18701	0.14	70591
20.2	352.65	8.05	1	0.010269	-0.010571	0.009935	0.07673	95255	1.86	128	890	0	64	2182	1076	1864	41410	103	5901	936	311	5010	380778	0	263	1320	800	137	12	0	135	687	329	3151	0	244	86	166	606	27	1418	373	2249	1367	3369	51474	18363	0.141	69837
20.3	353.65	8.06	1	0.010269	-0.010571	0.009935	0.07673	93090	1.78	67	870	0	69	2164	1117	1738	40877	112	5813	935	235	4904	373190	0	218	1207	794	119	9	0	0	656	242	3025	0	150	4	225	587	124	1194	415	2187	1499	3254	50881	18094	0.139	68975
20.4	354.65	8.07	1	0.010269	-0.010571	0.009935	0.07673	91538	1.69	113	790	0	87	2211	1142	1632	39128	0	5760	839	283	4740	366357	0	138	1169	690	28	0	0	90	683	207	3077	95	86	51	241	588	38	1112	449	2118	1368	3305	51328	18359	0.138	69687
20.5	355.65	8.05	1	0.010269	-0.010571	0.009935	0.07673	95834	1.87	115	948	0	57	2370	1037	1771	42347	79	6003	1087	247	5104	386281	0	228	1202	772	10	31	53	6	757	162	3136	40	197	39	367	623	76	1516	603	2310	1359	2836	50416	18328	0.14	68744
20.6	356.65	8.06	1	0.010269	-0.010571	0.009935	0.07673	96029	1.91	100	829	0	94	2254	970	1795	41820	21	6082	991	231	4936	387259	0	230	1203	838	168	0	0	100	838	198	3203	0	13	52	170	629	122	1563	463	2111	1451	3697	50925	18604	0.14	69529
20.7	357.65	8.06	1	0.010269	-0.010571	0.009935	0.07673	95924	1.85	93	844	0	95	2222	1116	1802	42214	130	5943	931	299	5046	386657	0	294	1220	779	93	0	0	99	741	142	3241	40	0	128	197	611	56	1373	441	2463	1424	2532	51795	18529	0.141	70324
20.8	358.65	8.05	1	0.010269	-0.010571	0.009935	0.07673	97912	1.92	105	918	0	93	2254	1057	1803	43860	41	6339	945	295	5099	396640	182	250	1239	823	182	88	27	0	700	371	3317	0	53	63	276	567	0	1420	261	2270	1501	2535	50993	18386	0.141	69379
20.9	359.65	8.07	1	0.010269	-0.010571	0.009935	0.07673	96545	1.86	142	1002	0	90	2243	1080	1779	42936	0	5899	1057	320	5110	389702	0	282	1352	822	208	0	0	12	766	313	3130	0	45	83	328	652	93	1422	185	2260	1541	3641	51605	18761	0.14	70366
21	360.65	8.05	1	0.010269	-0.010571	0.009935	0.07673	97164	1.86	133	969	0	91	2157	1023	1747	43255	161	6226	1078	274	5146	394627	0	239	1298	845	99	26	56	21	705	24	3155	0	138	0	345	614	138	1454	647	2313	1485	3436	51498	18819	0.14	70317
21.1	361.65	8.06	1	0.010269	-0.010571	0.009935	0.07673	98149	1.85	70	963	0	72	2169	1099	1824	44214	81	6290	1009	251	5227	398119	64	160	1299	751	162	33	0	106	681	530	3297	0	68	71	260	642	87	1487	0	2404	1395	2793	51615	18978	0.142	70593
21.2	362.65	8.06	1	0.010269	-0.010571	0.009935	0.07673	98318	1.9	133	862	0	82	2252	1028	1851	44504	34	6320	1020	332	5312	400270	0	139	1313	758	108	0	0	134	747	130	3213	65	83	62	256	628	87	1416	498	2640	1423	2477	51445	18280	0.14	69725
21.3	363.65	8.06	1	0.010269	-0.010571	0.009935	0.07673	99583	1.94	134	937	0	81	2267	1020	1924	45169	22	6362	1058	303	5354	406284	0	193	1372	703	82	0	0	8	745	378	3209	0	228	35	145	648	106	1487	298	2362	1467	3219	50811	18594	0.142	69405
21.4	364.65	8.07	1	0.010269	-0.010571	0.009935	0.07673	98614	1.88	106	967	0	74	2126	1061	1864	44921	10	6197	1013	328	5294	402053	21	237	1400	804	158	0	0	32	593	242	3187	22	0	89	217	630	138	1340	335	2626	1567	2233	50770	18291	0.141	69061
21.5	365.65	8.06	1	0.010269	-0.010571	0.009935	0.07673	100454	2	83	910	0	62	2177	1013	1866	45384	0	6469	1040	317	5298	411823	0	196	1445	870	162	0	85	114	716	50	3189	53	0	33	261	778	47	1802	716	2434	1583	2789	50958	18765	0.142	69723
21.6	366.65	8.06	1	0.010269	-0.010571	0.009935	0.07673	100221	1.96	130	992	0	64	2240	984	1908	44624	53	6222	1117	266	5294	408633	0	222	1350	793	159	0	52	0	672	173	3450	0	23	91	140	668	70	1540	606	2514	1504	2848	51135	18824	0.142	69959
21.7	367.65	8.06	1	0.010269	-0.010571	0.009935	0.07673	101149	1.92	162	1040	0	97	2303	1042	2016	44979	80	6464	1097	296	5311	413135	0	226	1411	753	174	0	0	0	802	0	3214	0	302	23	222	662	49	1593	661	2588	1377	2765	51653	18975	0.143	70628
21.8	368.65	8.07	1	0.010269	-0.010571	0.009935	0.07673	101124	2.15	104	941	0	88	2163	1066	2021	45186	90	6426	1145	360	5505	413087	0	216	1489	819	206	8	0	27	665	199	3400	0	0	104	133	604	50	1507	481	2645	1636	2977	51911	18522	0.143	70433
21.9	369.65	8.07	1	0.010269	-0.010571	0.009935	0.07673	101172	1.97	138	987	0	127	2213	1114	1976	44673	114	6460	1022	299	5333	412959	0	300	1413	802	231	72	0	52	711	227	3233	0	0	87	197	558	162	1650	438	2589	1627	2439	52428	18504	0.143	70932
22	370.65	8.07	1	0.010269	-0.010571	0.009935	0.07673	101378	1.9	120	1010	0	72	2410	1069	1893	44611	103	6459	1037	330	5322	413942	0	204	1435	797	161	0	105	120	745	109	3539	55	41	56	181	678	74	1621	741	2455	1440	2869	52571	18755	0.144	71326
22.1	371.65	8.07	1	0.010269	-0.010571	0.009935	0.07673	102591	1.94	176	933	0	110	2392	962	1897	44502	39	6435	1015	224	5292	418164	130	295	1472	910	176	13	0	103	666	370	3313	0	113	0	263	780	209	1716	352	2325	1501	2881	52898	19034	0.144	71932
22.2	372.65	8.07	1	0.010269	-0.010571	0.009935	0.07673	102242	1.92	132	1029	0	102	2203	998	2008	44613	22	6533	1088	262	5384	418559	6	179	1456	876	114	0	0	126	714	161	3221	53	57	69	210	647	79	1793	513	2415	1488	2997	51650	18650	0.143	70300
22.3	373.65	8.07	1	0.010269	-0.010571	0.009935	0.07673	101643	1.83	125	879	0	81	2397	1059	1877	44760	21	6258	1080	323	5362	416255	23	228	1511	868	320	6	97	119	575	247	3321	0	0	79	152	763	35	1808	233	2124	1588	3273	51448	18553	0.143	70001
22.4	374.65	8.07	1	0.010269	-0.010571	0.009935	0.07673	101393	1.84	114	965	0	101	2413	1044	1924	44540	0	6460	1054	273	5427	413917	0	154	1273	787	67	16	0	42	840	283	3408	46	210	109	268	580	135	1444	486	2420	1483	3477	51944	18897	0.143	70841
22.5	375.65	8.07	1	0.010269	-0.010571	0.009935	0.07673	100282	1.85	166	894	4	81	2449	1045	1828	43686	35	6308	1082	337	5291	408594	0	242	1400	769	162	109	33	48	629	185	3441	123	154	0	256	639	38	1619	385	2538	1529	2860	51325	18721	0.142	70046
22.6	376.65	8.08	1	0.010269	-0.010571	0.009935	0.07673	100661	1.88	79	935	0	87	2531	1119	1824	44257	0	6078	961	304	5358	410728	277	149	1389	808	175	0	178	148	735	277	3400	51	173	103	230	735	0	1633	349	2654	1612	1986	51470	19080	0.143	70550
22.7	377.65	8.08	1	0.010269	-0.010571	0.009935	0.07673	100369	1.98	138	886	0	87	2399	1087	1889	44251	51	6252	1042	326	5346	408798	0	221	1376	728	81	0	0	158	698	257	3449	35	109	120	286	691	95	1775	625	2341	1473	2985	51781	18933	0.142	70714
22.8	378.65	8.07	1	0.010269	-0.010571	0.009935	0.07673	103824	1.99	110	988	6	123	2501	963	1938	45922	40	6562	1060	328	5609	423437	0	298	1413	930	166	0	51	6	739	266	3568	0	113	71	265	619	217	1699	591	2461	1585	3457	53071	19201	0.144	72272
22.9	379.65	8.07	1	0.010269	-0.010571	0.009935	0.07673	101411	1.96	75	892	0	91	2713	990	1875	44493	7	6424	1199	280	5321	408016	0	263	1373	894	110	110	0	34	833	278	3339	0	175	83	194	694	71	1722	571	2149	1554	3025	53671	19110	0.144	72781
23	380.65	8.08	1	0.010269	-0.010571	0.009935	0.07673	96887	1.89	96	851	0	42	2496	997	1818	43482	63	6118	1014	237	5081	387689	234	298	1448	760	248	56	0	15	792	204	3134	23	183	17	95	687	96	1518	352	2430	1534	2060	52140	18652	0.141	70792
23.1	381.65	8.07	1	0.010269	-0.010571	0.009935	0.07673	100416	1.87	99	745	0	67	2965	1049	1707	44691	0	6269	1076	303	5243	402151	0	229	1391	804	77	35	50	108	603	276	3279	0	116	109	275	671	93	1821	425	2295	1510	3423	53470	19140	0.144	72610
23.2	382.65	8.06	1	0.010269	-0.010571	0.009935	0.07673	101076	1.86	119	751	0	67	3007	986	1741	44552	71	6300	1066	374	5355	405530	164	215	1315	847	110	0	0	46	763	231	3246	129	85	59	297	763	77	1461	247	2470	1529	2469	53936	19475	0.144	73411
23.3	383.65	8.07	1	0.010269	-0.010571	0.009935	0.07673	102570	1.95	146	798	0	87	2944	1047	1842	45961	0	6424	1098	323	5505	413320	0	147	1341	905	207	54	0	179	776	386	3460	18	140	35	214	624	80	1717	430	2271	1520	3126	53831	19024	0.145	72855
23.4	384.65	8.07	1	0.010269	-0.010571	0.009935	0.07673	101495	1.9	89	762	0	105	2895	1028	1814	45118	92	6094	1033	234	5352	404991	57	200	1325	864	154	0	81	105	865	86	3488	80	82	91	282	682	6	1616	881	2366	1522	2571	54168	19168	0.145	73336
23.5	385.65	8.08	1	0.010269	-0.010571	0.009935	0.07673	98985	1.83	61	602	0	72	3183	1008	1670	42092	55	5932	1117	236	5150	389451	182	273	1312	764	86	4	0	12	992	28	3094	142	0	50	336	667	233	1203	542	2402	1398	2395	55845	19490	0.144	75335
23.6	386.65	8.08	1	0.010269	-0.010571	0.009935	0.07673	98422	1.86	127	643	0	105	2976	994	1692	42250	73	6025	1060	268	5073	386756	0	207	1339	796	97	21	135	70	869	254	3084	0	185	69	328	666	0	1527	399	2502	1503	3070	54691	19000	0.144	73691
23.7	387.65	8.07	1	0.010269	-0.010571	0.009935	0.07673	98923	1.87	67	630	0	95	3031	1021	1690	42065	29	6057	859	349	5057	391418	0	220	1260	670	73	0	0	95	884	223	3030	0	7	78	265	582	187	1304	339	2304	1424	2966	55030	19306	0.144	74336
23.8	388.65	8.08	1	0.010269	-0.010571	0.009935	0.07673	99132	1.87	102	590	0	92	3100	989	1670	42140	121	5837	1033	344	5120	387987	79	249	1303	792	24	0	0	67	757	294	3085	0	142	75	227	681	0	1523	224	2315	1506	2811	56297	19458	0.145	75755
23.9	389.65	8.06	1	0.010269	-0.010571	0.009935	0.07673	98448	1.92	139	599	0	124	3210	1045	1643	41611	0	5607	896	366	4899	384445	0	230	1436	771	88	0	0	51	804	336	3022	0	9	135	263	621	19	1555	178	2257	1551	3083	55114	19168	0.144	74282
24	390.65	8.07	1	0.010269	-0.010571	0.009935	0.07673	98524	1.77	115	640	0	89	3174	1047	1592	42425	60	5967	959	319	5174	386243	0	251	1315	834	132	6	0	53	881	183	3103	47	40	98	246	675	102	1690	319	2298	1551	3192	55537	19049	0.144	74586
24.1	391.65	8.07	1	0.010269	-0.010571	0.009935	0.07673	98206	1.84	115	630	0	83	3065	1017	1719	42008	41	5946	1032	297	4965	384539	11	254	1347	887	144	41	0	0	857	76	2952	87	92	0	279	627	166	1667	448	2353	1447	2527	55293	19202	0.144	74495
24.2	392.65	8.07	1	0.010269	-0.010571	0.009935	0.07673	99704	1.88	72	672	0	92	3130	1054	1672	43364	0	5905	1053	272	5088	392619	0	255	1242	818	157	44	0	0	872	142	3154	0	106	64	331	619	168	1515	436	2549	1362	2897	55850	19435	0.145	75285
24.3	393.65	8.07	1	0.010269	-0.010571	0.009935	0.07673	97944	1.96	73	658	0	128	3040	1046	1643	42403	58	5954	1055	256	5226	385831	0	236	1384	809	128	0	0	165	759	209	3037	0	195	0	259	652	69	1342	421	2596	1515	2630	54342	18826	0.143	73168
24.4	394.65	8.07	1	0.010269	-0.010571	0.009935	0.07673	99201	1.91	123	749	0	105	3106	1023	1673	43617	34	6059	1019	306	5214	393330	0	188	1227	841	51	178	0	219	802	194	3141	31	91	0	330	475	122	1526	589	2492	1472	2659	54060	18860	0.144	72920
24.5	395.65	8.07	1	0.010269	-0.010571	0.009935	0.07673	96959	1.95	71	666	0	95	2890	1054	1700	42732	93	5785	1010	318	5013	381922	0	224	1230	754	37	0	0	12	692	185	3280	92	130	99	229	628	0	1612	241	2427	1327	3358	54176	18939	0.142	73115
24.6	396.65	8.07	1	0.010269	-0.010571	0.009935	0.07673	97598	1.91	77	704	0	70	2994	1078	1608	43109	0	5899	987	355	5103	384297	0	226	1269	850	143	116	0	39	835	187	3289	0	104	54	280	616	139	1349	424	2426	1488	2815	53876	19152	0.143	73028
24.7	397.65	8.08	1	0.010269	-0.010571	0.009935	0.07673	98080	1.86	118	683	0	100	3012	946	1681	43142	11	5931	983	274	4964	387202	110	291	1384	801	271	30	0	26	711	346	3231	0	0	47	242	640	27	1484	386	1972	1547	2928	54275	18699	0.143	72974
24.8	398.65	8.08	1	0.010269	-0.010571	0.009935	0.07673	97780	1.84	81	693	0	74	3136	1085	1593	42741	77	5892	914	314	4967	387003	0	236	1325	730	86	0	114	58	826	165	3123	25	79	66	204	725	10	1502	406	2171	1561	2956	52934	19280	0.143	72214
24.9	399.65	8.07	1	0.010269	-0.010571	0.009935	0.07673	96481	1.87	63	583	0	86	3366	948	1508	39250	86	5700	993	304	4966	379665	0	262	1220	826	163	41	26	149	842	166	3274	40	176	9	220	511	136	1229	395	2377	1330	2464	53290	18891	0.142	72181
25	400.65	8.08	1	0.010269	-0.010571	0.009935	0.07673	95455	1.74	113	586	0	106	3294	1099	1590	39201	51	5503	842	266	4869	374321	0	207	1213	782	62	117	0	164	917	184	3140	189	71	82	251	598	19	1578	508	2057	1487	3214	53656	19134	0.142	72790
25.1	401.65	8.08	1	0.010269	-0.010571	0.009935	0.07673	95497	1.81	88	554	9	136	3333	1045	1484	39399	69	5664	964	275	4870	374737	0	222	1305	754	121	0	0	35	801	113	3125	40	0	0	214	646	153	1402	519	2140	1476	2934	53527	18768	0.142	72295
25.2	402.65	8.08	1	0.010269	-0.010571	0.009935	0.07673	94464	1.74	85	504	0	82	3539	1072	1479	38293	36	5451	827	289	4849	368468	0	202	1131	667	95	0	0	68	818	268	3042	0	0	22	228	645	43	1431	181	2372	1313	2572	54038	18762	0.141	72800
25.3	403.65	8.09	1	0.010269	-0.010571	0.009935	0.07673	96426	1.83	86	496	0	85	3566	1027	1539	39766	43	5516	959	349	4960	378167	166	272	1199	810	155	0	84	93	766	270	3268	0	0	90	306	724	15	1385	277	2018	1480	2894	53882	19304	0.142	73186
25.4	404.65	8.08	1	0.010269	-0.010571	0.009935	0.07673	98822	1.73	61	589	0	95	3553	990	1616	41988	34	5788	922	281	5029	388814	0	215	1218	785	133	0	124	55	851	315	3389	0	46	33	331	645	0	1686	290	2086	1445	3377	53655	19315	0.144	72970
25.5	405.65	8.09	1	0.010269	-0.010571	0.009935	0.07673	95762	1.75	59	540	0	89	3581	1087	1550	38577	8	5361	964	282	4922	372448	0	267	1203	643	112	0	0	31	855	67	3286	0	150	39	293	682	90	1497	747	2022	1440	3241	54958	18962	0.143	73920
25.6	406.65	8.08	1	0.010269	-0.010571	0.009935	0.07673	95563	1.67	103	466	0	91	3802	1059	1457	37316	118	5407	914	266	4851	368793	0	200	1258	729	112	39	0	6	756	201	3312	64	213	0	266	642	85	1379	502	2289	1347	3569	54799	19259	0.143	74058
25.7	407.65	8.08	1	0.010269	-0.010571	0.009935	0.07673	96571	1.85	85	497	0	113	3969	1007	1391	37378	71	5406	934	344	4796	372854	0	262	1289	814	71	0	0	31	964	141	3301	58	185	54	267	619	225	1369	440	2184	1377	3571	55249	19454	0.143	74703
25.8	408.65	8.07	1	0.010269	-0.010571	0.009935	0.07673	98131	1.79	101	523	0	128	3837	1036	1509	38371	45	5448	1018	291	5022	380575	55	250	1397	769	102	46	0	0	852	373	3386	0	224	0	232	737	0	1577	472	2025	1424	3203	55402	19519	0.144	74921
25.9	409.65	8.08	1	0.010269	-0.010571	0.009935	0.07673	95778	1.71	116	498	0	112	3841	1019	1585	37632	79	5419	887	279	4816	371579	0	260	1212	892	118	0	0	12	887	247	3212	32	0	61	262	664	98	1287	439	2188	1389	3232	54827	19316	0.143	74143
26	410.65	8.08	1	0.010269	-0.010571	0.009935	0.07673	95077	1.7	108	520	0	100	3727	1019	1468	36976	78	5234	966	287	4785	369768	0	318	1170	707	105	47	0	99	878	255	3172	123	321	68	243	624	191	1189	288	2312	1329	2963	54799	19436	0.142	74235
26.1	411.65	8.08	1	0.010269	-0.010571	0.009935	0.07673	95460	1.75	83	459	7	123	4212	1046	1457	35506	141	5261	930	286	4615	364678	0	182	1148	668	78	0	0	103	976	108	3135	0	104	15	288	626	51	1351	297	2226	1352	3215	55039	19099	0.144	74138
26.2	412.65	8.07	1	0.010269	-0.010571	0.009935	0.07673	96017	1.7	109	424	0	123	4217	1080	1367	35466	85	5094	944	278	4735	365248	0	267	1275	812	15	0	0	115	917	189	3296	23	69	53	324	681	250	1318	604	2148	1391	3263	55795	19165	0.145	74960
26.3	413.65	8.07	1	0.010269	-0.010571	0.009935	0.07673	93605	1.59	72	423	0	126	4176	1026	1303	34107	80	4698	816	285	4508	351135	0	260	1273	650	92	0	0	258	878	53	3203	85	0	73	248	670	257	1127	627	2117	1280	3281	56749	19436	0.144	76185
26.4	414.65	8.06	1	0.010269	-0.010571	0.009935	0.07673	93931	1.58	67	336	0	108	4615	970	1177	32018	11	4432	868	254	4444	345362	287	325	1346	711	118	27	0	19	1060	202	3197	0	162	28	381	692	0	1269	388	1998	1345	2354	57155	19728	0.145	76883
26.5	415.65	8.06	1	0.010269	-0.010571	0.009935	0.07673	91690	1.56	98	269	17	127	4789	1069	1121	28745	73	4195	770	285	4322	330650	0	301	1151	645	33	0	0	157	1111	287	3168	59	61	0	330	756	263	1033	424	1746	1159	3508	58707	19831	0.145	78538
26.6	416.65	8.07	1	0.010269	-0.010571	0.009935	0.07673	95343	1.64	107	245	0	219	5450	1103	1103	28601	161	4311	883	286	4347	340050	35	223	1303	738	253	0	0	88	1000	131	3115	94	11	0	337	659	66	1378	293	2025	1374	2927	60642	20249	0.148	80891
26.7	417.65	8.07	1	0.010269	-0.010571	0.009935	0.07673	91274	1.58	86	484	0	115	4164	1088	1244	33571	0	4553	816	240	4354	331773	36	176	1122	641	73	71	29	58	1145	314	3198	0	114	10	230	649	192	1180	49	1866	1202	2612	57614	19400	0.143	77014
26.8	418.65	8.05	1	0.010269	-0.010571	0.009935	0.07673	88819	1.55	37	222	0	121	5127	1100	1073	24372	39	3927	658	268	3892	312764	0	203	1001	591	0	0	0	51	1069	228	2960	0	140	0	345	657	67	928	169	1610	1149	3343	58357	19645	0.144	78002
26.9	419.65	8.03	1	0.010269	-0.010571	0.009935	0.07673	92923	1.62	70	306	0	129	5227	1043	1055	28359	131	4281	710	287	4375	335112	0	233	1098	672	40	121	0	220	1123	185	3055	18	74	0	349	619	89	1177	406	1901	1230	3882	58899	20185	0.146	79084
27	420.65	8.03	1	0.010269	-0.010571	0.009935	0.07673	92697	1.59	74	265	0	113	4863	1062	1162	29362	56	4236	781	374	4417	337667	0	265	1316	720	151	0	0	193	999	119	3026	0	116	46	190	749	146	1093	354	1847	1332	3500	58267	19898	0.144	78165
27.1	421.65	8.04	1	0.010269	-0.010571	0.009935	0.07673	92429	1.53	91	383	5	87	4665	1069	1207	31154	58	4601	800	295	4473	340376	0	260	1207	669	78	52	0	134	1022	0	2915	0	179	17	308	674	99	1277	653	1839	1213	3644	56520	19534	0.144	76054
27.2	422.65	8.04	1	0.010269	-0.010571	0.009935	0.07673	90282	1.54	71	232	0	128	4704	1060	1146	28560	0	4118	915	271	4160	328727	0	217	1153	740	85	0	0	10	916	253	2855	0	202	0	308	642	83	1073	151	1843	1255	3105	56670	19827	0.143	76497
27.3	423.65	8.03	1	0.010269	-0.010571	0.009935	0.07673	91898	1.61	90	259	0	127	4973	1017	1120	28182	69	4189	818	234	4410	335077	0	264	1361	681	117	0	0	190	1123	323	3016	0	185	35	336	611	301	1059	185	1820	1181	3209	57533	19813	0.144	77346
27.4	424.65	8.03	1	0.010269	-0.010571	0.009935	0.07673	91977	1.58	46	222	0	140	4940	1007	1130	28945	46	4457	777	311	4377	337384	8	279	1275	708	120	0	0	17	960	294	2931	0	90	0	302	704	47	1136	260	1971	1185	2872	56994	19720	0.144	76714
27.5	425.65	8.02	1	0.010269	-0.010571	0.009935	0.07673	93895	1.53	58	247	0	143	5092	1027	1122	29643	24	4410	754	313	4231	342012	123	208	1243	755	96	38	42	124	1064	209	3028	0	60	42	407	695	127	1089	324	1670	1404	3110	59157	19973	0.146	79130
27.6	426.65	8.02	1	0.010269	-0.010571	0.009935	0.07673	93524	1.6	67	312	18	162	5111	1067	1209	28866	108	4331	875	271	4435	339249	0	252	1108	658	141	0	0	105	1084	168	3105	0	43	0	342	655	157	1138	506	2104	1281	3505	59740	20219	0.146	79959
27.7	427.65	8.03	1	0.010269	-0.010571	0.009935	0.07673	96359	1.64	70	511	0	143	4541	1057	1313	34197	84	4998	792	247	4702	362167	0	314	1305	728	157	0	30	118	820	58	2807	0	50	66	271	675	47	1350	685	2100	1373	3145	57145	19686	0.146	76831
27.8	428.65	8.02	1	0.010269	-0.010571	0.009935	0.07673	88392	1.61	84	554	0	78	3881	1083	1222	33700	107	4438	804	270	4318	330915	0	268	1100	656	0	0	0	13	1004	194	2837	0	81	84	385	592	146	1134	209	2049	1282	2669	53265	18660	0.14	71925
27.9	429.65	8.02	1	0.010269	-0.010571	0.009935	0.07673	84536	1.49	57	387	0	90	3827	1100	1078	27732	72	4130	728	214	3902	308995	0	234	1186	541	52	46	0	0	720	153	2702	0	72	0	211	629	147	1002	120	1589	1289	2867	54377	18746	0.138	73123
28	430.65	8.02	1	0.010269	-0.010571	0.009935	0.07673	89820	1.63	71	297	18	145	4720	1088	1077	27624	66	4189	742	212	4060	323713	0	224	1215	598	116	8	193	171	1075	258	3002	0	180	36	217	654	0	1039	114	1853	1231	3515	57053	19533	0.144	76586
28.1	431.65	8	1	0.010269	-0.010571	0.009935	0.07673	90033	1.58	64	284	0	145	5021	1000	1070	26133	21	3924	696	301	4086	320174	0	203	1203	472	79	0	0	99	1068	207	2912	0	56	0	263	600	180	1143	227	1921	1210	3790	58063	19601	0.145	77664
28.2	432.65	8.02	1	0.010269	-0.010571	0.009935	0.07673	90582	1.56	118	319	0	135	5051	1054	1155	27825	61	3964	685	288	4161	326624	0	305	1128	742	80	0	13	271	1152	91	2889	0	140	60	256	672	144	1092	598	2111	1220	3421	57970	19601	0.144	77571
28.3	433.65	8.02	1	0.010269	-0.010571	0.009935	0.07673	88390	1.51	57	283	0	114	4768	1034	1047	26168	90	3867	707	240	3959	316317	0	275	1186	682	0	0	0	149	819	236	3015	0	129	0	393	604	66	1026	304	1912	1328	3876	57429	19439	0.143	76868
28.4	434.65	8.02	1	0.010269	-0.010571	0.009935	0.07673	90033	1.63	81	364	0	93	4661	1073	1124	29379	38	4304	692	243	4150	324713	0	229	1104	578	9	0	0	78	845	214	2957	0	35	0	177	515	75	1123	6	1998	1158	4029	57890	19675	0.144	77565
28.5	435.65	8.01	1	0.010269	-0.010571	0.009935	0.07673	90224	1.67	101	328	11	138	4678	1111	1103	28960	8	4077	715	270	4095	324641	0	290	1286	614	62	0	0	41	1086	124	2972	0	180	95	301	736	210	1156	494	2137	1336	3545	57961	19662	0.144	77623
28.6	436.65	8	1	0.010269	-0.010571	0.009935	0.07673	91129	1.65	51	305	0	126	4981	1044	1123	26944	54	3983	788	211	4042	321941	0	251	1135	647	25	0	0	23	1193	183	3080	0	192	15	347	679	58	1314	348	1870	1211	3565	60068	20077	0.146	80145
28.7	437.65	8	1	0.010269	-0.010571	0.009935	0.07673	94592	1.66	107	632	0	112	4572	1039	1207	36119	0	4646	906	268	4561	351718	165	250	1206	674	151	44	22	10	970	97	2828	105	128	0	191	582	0	1397	411	2094	1255	2187	57544	19431	0.145	76975
28.8	438.65	7.99	1	0.010269	-0.010571	0.009935	0.07673	87100	1.51	89	562	0	104	3702	994	1175	32686	0	4314	822	279	4220	320506	0	304	1347	546	141	23	0	150	936	296	2855	0	122	0	232	667	32	1010	220	1682	1245	2886	54732	18880	0.14	73612
28.9	439.65	7.97	1	0.010269	-0.010571	0.009935	0.07673	88328	1.58	74	438	0	105	4755	929	1147	31100	31	4067	776	276	4274	325388	309	227	1121	681	98	34	153	158	878	218	2843	0	56	0	248	664	0	1079	329	1576	1346	2685	54377	18735	0.14	73112
29	440.65	7.99	1	0.010269	-0.010571	0.009935	0.07673	86146	1.53	77	240	0	171	5055	1006	945	24605	57	3576	680	253	3751	306785	0	217	1186	605	103	0	0	134	1074	263	2865	0	0	38	222	653	107	935	401	1683	1255	3881	56085	18933	0.141	75018
29.1	441.65	7.99	1	0.010269	-0.010571	0.009935	0.07673	90814	1.56	85	261	0	147	5301	944	1124	25740	0	3984	732	275	4029	329322	0	344	1242	613	47	80	28	234	1103	199	3039	42	105	11	392	684	25	1344	275	1742	1296	3259	56599	19515	0.143	76114
29.2	442.65	7.98	1	0.010269	-0.010571	0.009935	0.07673	89034	1.51	44	206	0	97	5177	909	1011	26025	91	3864	780	155	4176	324416	213	236	1127	750	105	106	0	73	1055	306	3125	0	0	53	414	678	115	1037	41	1887	1277	2235	56363	19379	0.143	75742
29.3	443.65	8	1	0.010269	-0.010571	0.009935	0.07673	90315	1.56	30	157	0	138	5360	1094	997	26588	163	3884	847	290	4152	325234	0	246	1235	653	222	8	0	83	1021	162	3000	0	308	59	266	587	130	1039	525	1967	1144	3321	57923	19409	0.144	77332
29.4	444.65	8	1	0.010269	-0.010571	0.009935	0.07673	90180	1.57	30	247	0	149	5242	999	1047	26661	119	3859	759	253	4213	327927	0	158	1227	587	47	14	0	0	990	153	2930	36	336	65	325	627	54	957	483	1709	1294	2943	56924	19879	0.143	76803
29.5	445.65	8	1	0.010269	-0.010571	0.009935	0.07673	89778	1.65	85	318	0	129	4818	995	1103	28688	56	4297	818	259	4145	328233	0	318	1227	677	107	35	0	35	1099	183	2929	0	97	0	221	799	244	895	304	1971	1247	3390	55688	19252	0.143	74940
29.6	446.65	8	1	0.010269	-0.010571	0.009935	0.07673	88095	1.52	80	359	0	122	4541	987	1104	29007	76	4086	846	244	4113	329310	0	252	1134	753	76	31	0	148	932	152	2808	21	225	9	212	626	39	1291	361	1776	1174	3098	53973	19040	0.14	73013
29.7	447.65	7.99	1	0.010269	-0.010571	0.009935	0.07673	88634	1.48	65	227	0	117	5279	966	993	25800	47	3774	789	323	4120	327569	0	218	1201	682	138	0	34	68	871	358	2618	0	13	42	307	608	0	838	161	2027	1301	3158	55210	19179	0.141	74389
29.8	448.65	7.99	1	0.010269	-0.010571	0.009935	0.07673	90936	1.67	79	321	0	154	5069	961	1104	29445	35	4258	844	318	4246	337730	0	282	1213	663	120	8	115	112	900	189	2832	5	163	12	273	593	0	1373	420	1962	1214	2970	55699	19587	0.142	75286
29.9	449.65	7.99	1	0.010269	-0.010571	0.009935	0.07673	89849	1.61	38	285	0	146	4777	1015	1169	29028	78	3996	729	235	4027	324169	0	226	1103	605	69	41	0	60	974	102	3080	0	47	64	263	578	0	1321	351	2101	1130	3410	56846	19577	0.144	76423
30	450.65	8	1	0.010269	-0.010571	0.009935	0.07673	88434	1.67	37	312	0	132	4904	1055	1085	29398	104	4184	867	316	4120	324540	79	196	1112	674	0	0	53	66	912	268	2847	68	219	28	369	524	106	1075	244	1788	1310	2949	55406	18914	0.141	74320
30.1	451.65	8	1	0.010269	-0.010571	0.009935	0.07673	88263	1.49	76	218	0	139	5303	1065	1016	25906	89	3853	739	271	4088	318196	0	234	1023	587	69	7	0	70	905	323	2790	0	0	0	396	710	94	964	108	1827	1104	2696	56068	19510	0.142	75578
30.2	452.65	7.99	1	0.010269	-0.010571	0.009935	0.07673	88208	1.53	58	217	0	181	5060	1148	1010	25699	117	3763	797	270	3945	315684	0	325	1227	610	135	0	0	0	931	351	2955	0	334	61	174	704	83	1007	0	1762	1264	3424	56798	19377	0.143	76175
30.3	453.65	7.98	1	0.010269	-0.010571	0.009935	0.07673	91286	1.51	90	242	0	154	5447	1051	986	25559	0	3836	756	212	4066	327157	0	198	1153	652	78	0	0	68	1066	321	3100	0	21	25	326	762	132	1070	230	1924	1312	3382	58561	20000	0.145	78561
30.4	454.65	7.99	1	0.010269	-0.010571	0.009935	0.07673	88611	1.59	59	308	0	163	5227	1038	1037	24861	45	3746	698	298	4011	311809	0	238	1190	587	18	0	10	96	1229	194	2977	0	79	0	385	654	20	1124	51	1850	1073	3398	58472	19703	0.144	78175
30.5	455.65	7.99	1	0.010269	-0.010571	0.009935	0.07673	86609	1.55	52	241	0	122	5158	1078	948	23922	22	3475	700	197	3747	303021	0	270	1140	547	6	74	0	109	1031	138	2743	0	103	0	351	686	84	1137	428	1882	1146	3567	57188	19678	0.142	76866
30.6	456.65	7.98	1	0.010269	-0.010571	0.009935	0.07673	87486	1.47	78	251	0	149	5177	1053	1010	24198	79	3558	671	210	3811	302089	0	257	1020	537	0	68	0	92	1034	118	3070	0	32	0	358	604	145	847	376	1646	1205	3079	58696	20216	0.144	78912
30.7	457.65	7.97	1	0.010269	-0.010571	0.009935	0.07673	86036	1.47	99	162	15	178	5346	1108	883	21590	98	3343	616	313	3707	294279	0	294	1043	625	81	0	0	129	1218	50	2796	0	14	0	301	634	254	840	386	1655	1117	3842	58941	19733	0.143	78674
30.8	458.65	7.97	1	0.010269	-0.010571	0.009935	0.07673	90306	1.42	60	205	0	170	5732	1147	944	23711	44	3514	703	265	4032	316950	227	305	1207	674	115	47	101	149	1168	237	3097	65	189	0	395	744	0	1006	199	1829	1255	2375	59669	19723	0.145	79392
30.9	459.65	7.96	1	0.010269	-0.010571	0.009935	0.07673	86652	1.49	41	237	0	166	5423	1070	889	21451	51	3204	700	282	3643	294376	0	355	1218	613	124	48	0	181	1155	112	2915	43	73	0	313	757	140	1113	337	1690	1152	3386	59451	19889	0.145	79340
31	460.65	7.93	1	0.010269	-0.010571	0.009935	0.07673	92603	1.47	96	225	16	203	6305	1058	1064	24156	129	3638	712	181	4015	320132	0	221	1180	567	0	21	16	209	1089	116	2931	0	0	0	330	727	10	1130	459	1731	1238	3794	60185	20480	0.148	80665
31.1	461.65	7.93	1	0.010269	-0.010571	0.009935	0.07673	89975	1.41	41	186	22	147	5640	1064	905	20980	104	3207	689	247	3635	299969	0	319	1027	576	0	59	164	110	1330	191	3132	0	107	0	459	627	0	1148	183	1571	1157	3716	60904	20617	0.148	81521
31.2	462.65	7.93	1	0.010269	-0.010571	0.009935	0.07673	93257	1.4	60	117	4	183	6779	1094	893	20076	109	3229	723	263	3804	308150	0	281	1172	663	99	0	0	178	1421	299	3145	0	220	0	381	770	23	1036	0	1764	1284	3080	63247	21370	0.151	84617
31.3	463.65	7.9	1	0.010269	-0.010571	0.009935	0.07673	94950	1.58	126	344	16	150	5613	1056	1097	26481	52	4116	807	230	4352	333288	0	325	1298	598	109	0	0	0	1092	23	3046	115	68	0	276	720	164	1211	412	1949	1225	3433	61929	20735	0.149	82664
31.4	464.65	7.89	1	0.010269	-0.010571	0.009935	0.07673	96152	1.66	98	423	0	148	5306	1117	1123	29682	16	4202	671	243	4564	337626	0	314	1229	614	26	0	0	0	1066	216	3031	0	84	10	350	645	132	1002	224	1964	1267	2851	61365	20717	0.15	82082
31.5	465.65	7.86	1	0.010269	-0.010571	0.009935	0.07673	100628	1.72	72	569	0	109	5022	1024	1378	34944	85	4756	887	318	4784	358782	52	260	1259	660	0	0	0	108	1086	192	3319	141	25	0	333	677	154	1274	300	1961	1375	2776	64958	21962	0.153	86920
31.6	466.65	7.84	1	0.010269	-0.010571	0.009935	0.07673	106818	1.79	162	920	0	94	3452	1142	1586	43891	95	5689	1041	297	5482	410480	252	362	1675	943	211	0	0	18	946	226	3541	84	63	56	127	616	222	1587	447	2380	1574	2440	61177	21042	0.155	82219
31.7	467.65	7.86	1	0.010269	-0.010571	0.009935	0.07673	92754	2.17	68	340	44	164	4695	1258	847	18901	0	3620	308	114	2221	188162	0	169	786	11526	596	533	794	577	733	0	1924	0	0	129	1160	1156	0	466	0	755	591	2318	82234	20016	0.17	102250
31.8	468.65	7.88	1	0.010269	-0.010571	0.009935	0.07673	171588	4.23	0	52	44	366	8975	1325	786	10529	0	4251	0	83	1031	106255	662	1026	1236	25012	40	0	128	374	1141	504	2068	0	6	512	1659	1510	346	628	442	601	433	260	228607	28323	0.273	256930
																																																	0
																																																	0
																																																	0
																																																	0
																																																	0
																																																	0
																																																	0
																																																	0
																																																	0
																																																	0
																																																	0
																																																	0
																																																	0
																																																	0
																																																	0
																																																	0
																																																	0
																																																	0
																																																	0
																																																	0
																																																	0
																																																	0
																																																	0
																																																	0
																																																	0
																																																	0
																																																	0
																																																	0
																																																	0
																																																	0
																																																	0
																																																	0
																																																	0
																																																	0
																																																	0
																																																	0
																																																	0
																																																	0
																																																	0
																																																	0
																																																	0
																																																	0
																																																	0
																																																	0
																																																	0
																																																	0
																																																	0
																																																	0
																																																	0
																																																	0
																																																	0
																																																	0
																																																	0
																																																	0
																																																	0
																																																	0
																																																	0
																																																	0
																																																	0
																																																	0
																																																	0
																																																	0
																																																	0
																																																	0
																																																	0
																																																	0
																																																	0
																																																	0
																																																	0
																																																	0
																																																	0
																																																	0
																																																	0
																																																	0
																																																	0
																																																	0
																																																	0
																																																	0
																																																	0
																																																	0
																																																	0
																																																	0
																																																	0
																																																	0
																																																	0
																																																	0
																																																	0
																																																	0
																																																	0
																																																	0
																																																	0
																																																	0
																																																	0
																																																	0
																																																	0
																																																	0
																																																	0
																																																	0
																																																	0
																																																	0
																																																	0
																																																	0
																																																	0
																																																	0
																																																	0
																																																	0
																																																	0
																																																	0
																																																	0
																																																	0
																																																	0
																																																	0
																																																	0
																																																	0
																																																	0
																																																	0
																																																	0
																																																	0
																																																	0
																																																	0
																																																	0
																																																	0
																																																	0
																																																	0
																																																	0
																																																	0
																																																	0
																																																	0
																																																	0
																																																	0
																																																	0
																																																	0
																																																	0
																																																	0
																																																	0
																																																	0
																																																	0
																																																	0
																																																	0
																																																	0
																																																	0
																																																	0
																																																	0
																																																	0
																																																	0
																																																	0
																																																	0
																																																	0
																																																	0
																																																	0
																																																	0
																																																	0
																																																	0
																																																	0
																																																	0
																																																	0
																																																	0
																																																	0
																																																	0
																																																	0
																																																	0
																																																	0
																																																	0
																																																	0
																																																	0
																																																	0
																																																	0
																																																	0
																																																	0
																																																	0
																																																	0
																																																	0
																																																	0
																																																	0
																																																	0
																																																	0
																																																	0
																																																	0
																																																	0
																																																	0
																																																	0
																																																	0
																																																	0
																																																	0
																																																	0
																																																	0
																																																	0
																																																	0
																																																	0
																																																	0
																																																	0
																																																	0
																																																	0
																																																	0
																																																	0
																																																	0
																																																	0
																																																	0
																																																	0
																																																	0
																																																	0
																																																	0
																																																	0
																																																	0
																																																	0
																																																	0
																																																	0

## Sheet: SE-31
Depth	position (mm)	sample surface	validity	E-gain	E-offset	F-slope	F-offset	cps	MSE	Al	Si	P	S	Cl	Ar	K	Ca	Sc	Ti	V	Cr	Mn	Fe	Co	Ni	Cu	Zn	Ga	Ge	As	Se	Br	Rb	Sr	Y	Zr	Ba	Ta	W	Pb	Fe a*2	Fe a+b	S1	S2	S3	Mo inc	Mo coh	Dt	Inc+coh
0	55.9	8.38	1	0.010269	-0.010571	0.009935	0.07673	90115	1.94	121	1196	0	89	2472	1047	1683	43611	53	5573	1018	308	4644	362396	0	297	1266	742	82	0	0	0	541	0	3222	96	308	80	150	559	46	1430	632	2123	1352	2364	50697	18120	0.137	68817
0.1	56.9	8.33	1	0.010269	-0.010571	0.009935	0.07673	91584	2.07	128	1359	0	57	2587	954	1870	48045	63	6154	931	281	4720	381914	0	351	1273	767	251	0	19	104	594	158	3347	56	304	26	75	729	18	1509	382	2322	1262	2325	46657	17136	0.134	63793
0.2	57.9	8.34	1	0.010269	-0.010571	0.009935	0.07673	78997	1.73	104	1073	0	43	1863	1005	1358	41773	22	5089	881	231	4127	320496	91	199	1023	634	99	0	24	7	365	94	3210	203	46	68	147	478	0	1264	364	1921	1221	1629	44352	16969	0.128	61321
0.3	58.9	8.33	1	0.010269	-0.010571	0.009935	0.07673	82058	1.93	168	1323	0	38	1897	968	1716	45414	52	5834	935	322	4489	352244	0	234	1159	790	90	0	0	136	497	350	2966	144	150	74	200	468	69	1281	242	2203	1283	2195	39995	15923	0.125	55918
0.4	59.9	8.34	1	0.010269	-0.010571	0.009935	0.07673	85310	1.88	155	1325	0	62	1746	935	1736	50310	0	5577	889	334	4596	355750	191	220	1214	690	127	29	92	41	354	357	3194	106	64	81	102	485	15	1179	134	2229	1254	1796	43662	16815	0.129	60477
0.5	60.9	8.37	1	0.010269	-0.010571	0.009935	0.07673	82976	1.94	142	1266	0	76	1809	1076	1763	41349	54	5360	873	276	4198	342655	0	235	1141	688	98	7	0	60	606	414	3230	44	144	108	236	549	140	1065	109	2203	1234	2081	43625	16776	0.128	60401
0.6	61.9	8.41	1	0.010269	-0.010571	0.009935	0.07673	82647	2.08	185	1156	0	71	1893	1133	2043	42135	55	5802	1064	247	4251	350347	148	208	1275	767	182	4	0	77	532	277	3716	30	217	74	239	534	100	1266	273	2129	1254	1713	41468	15645	0.126	57113
0.7	62.9	8.4	1	0.010269	-0.010571	0.009935	0.07673	83261	1.9	164	1231	0	103	1937	1109	1735	46574	14	5549	921	287	4408	348409	18	159	1227	737	110	0	0	144	457	143	3831	126	71	56	115	562	163	928	362	2207	1277	1759	42133	16289	0.127	58422
0.8	63.9	8.39	1	0.010269	-0.010571	0.009935	0.07673	77095	1.75	112	1071	0	111	1731	1205	1510	44513	51	4928	766	235	3963	313134	0	237	1102	631	212	0	0	0	369	147	3377	125	11	126	78	550	72	992	188	1821	1179	2641	41474	15914	0.125	57388
0.9	64.9	8.32	1	0.010269	-0.010571	0.009935	0.07673	88204	1.97	154	1172	0	41	2077	781	1716	54456	85	5514	918	249	4475	351138	0	256	1280	747	305	64	35	63	661	72	4353	13	8	84	171	550	53	1187	514	2081	1229	2273	47072	17578	0.134	64650
1	65.9	8.31	1	0.010269	-0.010571	0.009935	0.07673	88952	1.88	152	1224	0	54	2086	806	1780	50999	0	5697	911	199	4418	357471	0	219	1161	619	160	0	0	0	611	135	4377	68	0	37	164	524	216	1156	482	2308	1206	2857	46937	17451	0.134	64388
1.1	66.9	8.34	1	0.010269	-0.010571	0.009935	0.07673	88479	1.86	97	1111	0	71	2352	797	1753	45661	43	5642	893	254	4412	356717	190	211	1185	805	71	0	0	46	523	344	3745	0	0	55	215	595	106	1166	98	2137	1312	2154	47464	17450	0.134	64914
1.2	67.9	8.36	1	0.010269	-0.010571	0.009935	0.07673	96928	1.96	99	1196	0	121	2626	892	1873	49711	0	6236	963	316	4869	389353	151	209	1196	750	276	19	22	54	698	197	4176	32	338	30	114	637	103	1623	424	2320	1440	2362	49803	18366	0.141	68169
1.3	68.9	8.39	1	0.010269	-0.010571	0.009935	0.07673	100230	2.03	137	1132	0	103	2665	1006	1944	44827	37	6386	997	370	5105	409361	0	202	1364	826	153	58	0	77	899	358	3570	33	104	69	212	592	228	1573	222	2521	1576	2682	51710	18127	0.143	69837
1.4	69.9	8.4	1	0.010269	-0.010571	0.009935	0.07673	102429	2.02	131	1209	0	126	2649	978	2084	45165	33	6505	1037	350	5177	421654	0	260	1434	862	185	72	73	105	776	331	3379	0	82	163	246	713	70	1805	389	2695	1709	2617	51049	18501	0.143	69550
1.5	70.9	8.41	1	0.010269	-0.010571	0.009935	0.07673	100346	2.02	106	1182	0	100	2407	1010	2028	46998	0	6531	990	295	5083	409751	130	218	1399	781	305	0	37	114	606	108	3679	0	48	74	166	598	150	1616	443	2643	1567	2141	52074	18404	0.142	70478
1.6	71.9	8.42	1	0.010269	-0.010571	0.009935	0.07673	102133	2.18	134	1352	0	73	2400	1021	2127	48381	0	6699	1115	341	5331	422631	0	214	1467	898	87	0	109	98	702	349	3535	97	142	41	151	578	0	1630	154	2878	1622	2655	50502	18125	0.143	68627
1.7	72.9	8.43	1	0.010269	-0.010571	0.009935	0.07673	101076	2.16	167	1435	0	89	2166	1038	2129	49720	17	6971	1174	350	5405	426843	210	225	1332	752	162	0	22	0	529	273	3382	22	67	32	213	642	0	1747	384	2574	1680	1832	49090	18024	0.14	67114
1.8	73.9	8.42	1	0.010269	-0.010571	0.009935	0.07673	91448	2.07	144	1270	0	103	2035	1035	1839	45241	85	5918	959	319	4643	371232	0	250	1275	709	182	0	0	37	612	205	3503	15	92	113	122	570	49	1259	512	2457	1381	2193	48779	17887	0.136	66666
1.9	74.9	8.41	1	0.010269	-0.010571	0.009935	0.07673	99359	2.09	161	1367	0	91	2268	977	2017	46953	29	6604	1019	393	5102	411613	0	239	1328	824	110	71	0	83	622	311	3388	0	57	67	239	626	50	1574	387	2477	1544	2715	50335	18678	0.141	69013
2	75.9	8.43	1	0.010269	-0.010571	0.009935	0.07673	99504	1.93	108	1289	0	71	2457	1031	2001	49112	8	6523	1018	356	5078	406289	0	216	1472	887	172	44	0	82	744	209	3646	0	195	75	153	592	130	1489	469	2616	1447	2410	49935	18678	0.141	68613
2.1	76.9	8.42	1	0.010269	-0.010571	0.009935	0.07673	100217	1.99	179	1303	0	109	2486	958	2136	48790	57	6430	1152	322	5200	403092	0	215	1336	902	268	20	44	73	704	373	3786	40	59	6	191	595	55	1539	371	2556	1619	2602	52022	18816	0.143	70838
2.2	77.9	8.43	1	0.010269	-0.010571	0.009935	0.07673	102465	1.97	199	1300	0	73	2495	995	2097	52732	12	6580	1057	364	5049	412133	194	199	1370	844	112	20	0	0	625	368	4125	0	120	72	237	616	144	1343	120	2538	1509	2226	53265	19460	0.144	72725
2.3	78.9	8.43	1	0.010269	-0.010571	0.009935	0.07673	96788	2.05	114	1329	0	76	2573	1058	1989	48658	54	6434	1091	252	5408	399311	0	220	1308	871	168	0	48	53	545	248	3784	160	225	21	159	573	37	1784	444	2448	1553	2294	49059	18134	0.139	67193
2.4	79.9	8.44	1	0.010269	-0.010571	0.009935	0.07673	79112	1.77	102	1065	0	23	2048	1155	1454	40332	77	5133	748	196	4064	315375	0	220	1075	633	38	0	0	55	553	109	3545	185	222	23	231	473	147	991	324	1791	1187	2274	45190	16965	0.128	62155
2.5	80.9	8.45	1	0.010269	-0.010571	0.009935	0.07673	79145	1.79	114	1086	0	26	1807	1199	1524	44503	15	4977	913	235	4038	317913	0	178	1041	578	150	0	0	0	465	14	3829	130	242	54	55	571	0	1214	320	1947	1255	2406	42749	16668	0.128	59417
2.6	81.9	8.45	1	0.010269	-0.010571	0.009935	0.07673	87485	1.9	127	1119	0	72	2038	1084	1714	46553	0	5573	959	298	4348	355288	0	239	1145	683	107	0	0	0	498	322	4626	129	30	63	160	595	17	1209	159	2236	1303	2203	46511	17261	0.133	63772
2.7	82.9	8.41	1	0.010269	-0.010571	0.009935	0.07673	96742	1.95	149	1308	0	81	2457	922	1970	52655	20	6246	1053	334	4722	393499	274	227	1211	729	91	11	48	64	552	69	4464	0	126	0	207	634	17	1620	480	2324	1551	2324	48704	18168	0.139	66872
2.8	83.9	8.44	1	0.010269	-0.010571	0.009935	0.07673	99242	2.07	121	1313	0	73	2211	1028	1998	54253	7	6120	1059	348	5032	400221	0	275	1385	852	181	93	67	162	667	90	4636	53	239	89	170	700	112	1372	371	2488	1440	2841	51447	18516	0.142	69963
2.9	84.9	8.44	1	0.010269	-0.010571	0.009935	0.07673	105346	2.03	168	1412	0	103	2163	994	2117	54243	113	6724	1120	351	5153	429609	147	215	1315	882	174	144	77	0	795	179	4078	0	53	113	191	680	63	1681	462	2565	1562	2410	52995	18811	0.146	71806
3	85.9	8.46	1	0.010269	-0.010571	0.009935	0.07673	104471	2.05	165	1505	0	112	2221	1043	2203	52536	61	6770	1020	337	5189	426884	42	226	1522	805	207	29	33	78	716	438	3903	0	181	95	53	685	102	1778	238	2676	1597	2539	52651	18940	0.145	71591
3.1	86.9	8.47	1	0.010269	-0.010571	0.009935	0.07673	102361	2.02	167	1484	0	106	2214	1071	2179	50262	84	6552	1146	295	5048	416361	0	143	1457	721	26	9	0	72	704	194	3979	126	61	49	211	628	139	1543	568	2606	1601	2772	52703	18899	0.143	71602
3.2	87.9	8.47	1	0.010269	-0.010571	0.009935	0.07673	104498	1.97	145	1320	0	36	2206	1082	2216	50963	114	6885	1119	365	5093	422995	0	282	1380	892	68	32	155	169	798	205	3944	125	282	33	328	639	73	1687	475	2773	1671	2553	54820	18864	0.146	73684
3.3	88.9	8.47	1	0.010269	-0.010571	0.009935	0.07673	103945	2.09	155	1280	0	48	2407	1078	2124	48674	70	6661	1040	341	5076	419710	0	249	1338	858	60	0	57	68	771	243	3756	8	47	61	349	633	0	1654	436	2717	1591	2071	53867	18918	0.146	72785
3.4	89.9	8.47	1	0.010269	-0.010571	0.009935	0.07673	103520	2.02	122	1283	0	124	2408	1104	2107	48374	60	6570	1265	277	4963	416844	0	266	1303	931	64	0	114	117	836	226	3808	19	105	16	294	619	51	1737	342	2616	1631	2682	54909	19009	0.146	73918
3.5	90.9	8.46	1	0.010269	-0.010571	0.009935	0.07673	103968	2.09	138	1241	0	50	2602	1119	2042	47416	38	6505	1022	339	4924	418268	0	307	1413	853	76	0	0	35	803	285	3641	4	85	47	228	639	108	1753	295	2573	1591	2523	55184	19170	0.146	74354
3.6	91.9	8.46	1	0.010269	-0.010571	0.009935	0.07673	103270	2	165	1197	0	129	2494	1134	2030	44625	15	6415	1132	393	5026	418960	0	258	1387	847	61	0	135	117	844	6	3465	157	95	73	210	588	0	1940	589	2574	1647	2572	54340	19095	0.145	73435
3.7	92.9	8.47	1	0.010269	-0.010571	0.009935	0.07673	96947	2.02	111	1111	0	67	2275	1084	1986	41469	21	6223	964	293	4640	390475	0	165	1315	739	210	0	93	130	749	44	3375	38	162	17	213	726	54	1666	401	2513	1477	2934	52211	18373	0.141	70584
3.8	93.9	8.47	1	0.010269	-0.010571	0.009935	0.07673	101081	2.01	188	1295	0	122	2120	1100	2002	45843	0	6430	1145	334	4927	410784	64	230	1410	911	204	0	17	16	797	154	3588	8	143	0	137	620	119	1635	512	2406	1530	2343	52525	19018	0.144	71543
3.9	94.9	8.49	1	0.010269	-0.010571	0.009935	0.07673	89452	1.93	123	1274	0	55	1937	1185	1862	44438	23	5988	855	301	4536	366005	401	291	1261	784	122	33	18	0	621	221	3329	102	33	58	116	410	98	1185	470	2329	1361	1086	47762	17569	0.135	65331
4	95.9	8.5	1	0.010269	-0.010571	0.009935	0.07673	83960	1.84	176	1177	0	60	1852	1281	1664	41776	70	5712	981	204	4461	346188	78	272	1236	686	147	0	0	55	460	19	3544	156	306	37	188	474	0	1384	580	1888	1373	2391	44630	17471	0.13	62101
4.1	96.9	8.46	1	0.010269	-0.010571	0.009935	0.07673	64896	1.68	130	950	0	31	1414	1182	1329	33333	21	4385	661	263	3519	272508	335	187	985	504	0	0	0	0	289	260	2574	81	16	65	95	394	0	613	95	1549	1072	1220	35495	14163	0.114	49658
4.2	97.9	8.38	1	0.010269	-0.010571	0.009935	0.07673	65899	1.59	137	1070	0	40	1435	795	1198	37515	8	3991	711	196	3468	267134	109	228	919	611	96	0	25	0	241	130	2617	134	198	54	71	336	0	748	176	1537	1013	1791	36334	14910	0.117	51244
4.3	98.9	8.36	1	0.010269	-0.010571	0.009935	0.07673	62255	1.58	121	1014	0	61	1465	675	1023	32154	4	3926	827	218	3456	256070	0	175	881	514	37	0	0	0	342	0	2419	259	219	56	72	375	15	688	637	1368	821	2103	34600	14353	0.114	48953
4.4	99.9	8.38	1	0.010269	-0.010571	0.009935	0.07673	76122	1.88	153	1385	0	70	1824	715	1490	42971	56	5315	854	239	4031	320069	14	257	1108	679	101	0	0	0	304	101	2866	0	160	106	74	405	119	762	424	1891	1242	2027	39845	15994	0.122	55839
4.5	100.9	8.41	1	0.010269	-0.010571	0.009935	0.07673	90194	2.1	161	1573	0	69	2837	839	1617	48154	61	7283	1002	323	4905	393246	0	244	1144	922	82	0	0	0	415	174	2986	148	82	76	261	418	0	1508	309	2257	1360	2915	40835	17001	0.129	57836
4.6	101.9	8.4	1	0.010269	-0.010571	0.009935	0.07673	97125	2.15	183	1609	0	97	2586	776	1779	51148	20	7311	1251	315	5284	421017	0	232	1234	863	208	0	0	10	390	260	3207	109	285	16	185	535	62	1810	486	2440	1499	2693	44419	18158	0.136	62577
4.7	102.9	8.41	1	0.010269	-0.010571	0.009935	0.07673	94604	2.18	177	1569	0	80	2732	994	1652	52777	20	7786	1179	341	5043	408666	127	199	1299	785	111	0	0	41	351	306	3436	130	0	5	64	377	91	1546	358	2304	1458	2132	44046	17657	0.134	61703
4.8	103.9	8.44	1	0.010269	-0.010571	0.009935	0.07673	81019	1.88	167	1430	0	26	2166	1103	1511	49933	0	5416	989	217	4415	338907	41	282	1270	886	136	20	0	0	380	166	3139	61	116	79	149	503	37	913	361	1934	1244	2260	42114	16503	0.126	58617
4.9	104.9	8.44	1	0.010269	-0.010571	0.009935	0.07673	73958	1.75	112	1126	0	68	1862	1119	1375	38398	0	4788	766	239	4009	310862	280	244	1145	653	26	77	0	0	331	118	2883	293	68	83	151	319	78	859	512	1576	1127	1767	39169	15874	0.122	55043
5	105.9	8.46	1	0.010269	-0.010571	0.009935	0.07673	77612	1.92	131	1157	0	47	2164	1260	1528	43218	42	5841	807	240	4587	330789	12	149	1306	680	162	0	82	53	463	284	2847	59	210	0	146	368	0	1065	227	1933	1137	1999	38757	15409	0.123	54166
5.1	106.9	8.45	1	0.010269	-0.010571	0.009935	0.07673	57380	1.53	128	865	0	33	1429	1250	1068	30574	52	3596	584	125	2924	225657	123	188	855	476	48	0	0	0	291	25	2567	237	121	0	65	431	133	471	359	1268	846	1433	35341	14173	0.114	49514
5.2	107.9	8.43	1	0.010269	-0.010571	0.009935	0.07673	70056	1.85	189	1185	0	54	1972	1104	1303	40531	26	4547	799	211	3781	288770	349	283	968	697	90	6	73	0	417	88	3198	174	12	50	144	401	0	942	362	1733	1013	1327	38776	15344	0.118	54120
5.3	108.9	8.45	1	0.010269	-0.010571	0.009935	0.07673	72654	1.69	126	1243	0	39	1818	1142	1409	36643	57	4914	853	243	4009	307664	0	215	1056	648	76	0	0	0	232	193	2644	152	163	65	120	445	19	839	0	1731	1197	2179	37607	15382	0.119	52989
5.4	109.9	8.43	1	0.010269	-0.010571	0.009935	0.07673	80826	1.9	135	1477	0	41	2110	1094	1703	43255	0	5821	993	285	4568	345686	0	162	1156	778	101	107	55	0	414	280	2817	65	26	53	210	534	14	1346	194	2069	1185	1677	39122	16135	0.124	55257
5.5	110.9	8.41	1	0.010269	-0.010571	0.009935	0.07673	85291	1.83	155	1376	0	93	2243	993	1666	45148	0	5740	979	239	4748	360459	0	199	1334	740	68	7	0	28	342	329	3250	0	260	68	147	533	71	1178	232	2066	1330	2395	42882	17122	0.13	60004
5.6	111.9	8.43	1	0.010269	-0.010571	0.009935	0.07673	79292	2.03	161	1354	0	21	2207	1099	1572	54807	0	5350	928	205	4296	331322	36	166	1178	669	90	0	0	18	433	149	5154	114	12	0	170	337	152	1146	484	1910	1219	1985	38452	15416	0.125	53868
5.7	112.9	8.46	1	0.010269	-0.010571	0.009935	0.07673	72981	1.86	139	1221	0	75	1838	1169	1376	37571	8	4946	777	215	3819	303973	0	251	1113	565	183	0	0	0	458	153	2656	100	199	45	99	361	17	846	299	1918	1134	2239	38861	14988	0.122	53849
5.8	113.9	8.47	1	0.010269	-0.010571	0.009935	0.07673	67048	1.64	142	1197	0	96	1728	1194	1299	38182	27	4231	785	173	3546	275983	0	273	768	526	184	0	0	0	323	178	2688	52	98	0	74	482	12	852	94	1628	1092	2012	36610	14646	0.116	51256
5.9	114.9	8.46	1	0.010269	-0.010571	0.009935	0.07673	73419	1.79	172	1285	0	32	1798	1119	1262	42839	0	4925	836	242	4122	307059	316	245	918	696	151	0	10	0	359	147	2797	181	178	68	120	423	0	925	420	1801	1118	1272	38651	15353	0.121	54004
6	115.9	8.48	1	0.010269	-0.010571	0.009935	0.07673	70615	1.75	147	1302	0	50	1732	1195	1441	38724	0	4556	803	170	3736	285391	0	248	977	608	122	14	0	0	424	165	2743	120	16	94	156	424	126	837	209	1614	939	2080	39606	15860	0.121	55466
6.1	116.9	8.48	1	0.010269	-0.010571	0.009935	0.07673	80236	1.93	125	1421	0	33	2271	1084	1405	44643	63	5397	907	273	4381	334993	0	261	1256	643	152	0	0	0	363	172	3189	75	137	82	64	585	51	1221	431	2111	1222	2171	41454	16182	0.125	57636
6.2	117.9	8.5	1	0.010269	-0.010571	0.009935	0.07673	71329	1.8	127	1221	0	76	1818	1239	1714	44467	10	4426	777	172	3781	282619	0	192	972	607	47	0	0	0	391	0	2964	203	97	0	146	380	88	823	382	1760	969	1881	40365	16250	0.122	56615
6.3	118.9	8.5	1	0.010269	-0.010571	0.009935	0.07673	73537	1.75	127	1104	0	44	2009	1201	1270	37499	0	4826	777	199	4028	307561	6	208	1131	663	144	0	0	0	281	261	2591	206	39	89	138	295	156	960	130	1847	1090	1832	39740	15882	0.122	55622
6.4	119.9	8.52	1	0.010269	-0.010571	0.009935	0.07673	76310	1.79	176	1163	0	28	1877	1245	1323	42390	48	5163	872	201	4074	313391	0	232	1116	734	165	0	0	0	427	100	2952	78	92	67	214	561	105	1007	566	1969	1182	1929	41767	16313	0.124	58080
6.5	120.9	8.49	1	0.010269	-0.010571	0.009935	0.07673	72079	1.77	128	1196	0	43	1856	1099	1357	40416	5	4569	717	267	3883	292803	79	270	982	686	149	0	0	106	294	149	2908	233	277	111	34	328	5	1021	404	1786	1011	1768	40817	15906	0.122	56723
6.6	121.9	8.5	1	0.010269	-0.010571	0.009935	0.07673	79643	1.87	158	1412	0	67	2124	1251	1452	47223	0	5018	919	298	4673	331443	0	260	1002	626	166	0	0	87	479	113	2991	188	169	52	203	411	86	1221	509	2006	1215	2200	40825	16252	0.124	57077
6.7	122.9	8.48	1	0.010269	-0.010571	0.009935	0.07673	67577	1.68	134	1141	0	50	1897	1228	1365	39354	45	4312	652	316	3706	266363	33	177	815	608	139	0	0	68	372	278	2623	43	56	62	115	516	160	653	255	1344	1070	2082	38669	15084	0.119	53753
6.8	123.9	8.49	1	0.010269	-0.010571	0.009935	0.07673	82770	1.72	167	1290	0	85	2319	1184	1710	47721	0	5008	789	264	4238	330440	0	281	1371	550	53	0	0	0	420	112	3351	139	77	68	188	518	130	1122	558	2121	1218	1801	46319	17320	0.13	63639
6.9	124.9	8.48	1	0.010269	-0.010571	0.009935	0.07673	73106	1.9	103	1310	0	19	1841	1244	1309	43732	59	4630	720	263	4069	298090	17	237	995	557	59	0	0	0	410	299	2846	202	0	61	85	354	70	966	131	1829	1255	1926	40062	15974	0.122	56036
7	125.9	8.48	1	0.010269	-0.010571	0.009935	0.07673	79414	1.88	151	1484	0	65	2120	1213	1401	48463	45	5234	931	280	4182	325406	0	267	1037	778	193	0	0	0	432	97	3063	236	82	49	121	645	149	1066	668	2155	1167	2240	41844	16661	0.126	58505
7.1	126.9	8.47	1	0.010269	-0.010571	0.009935	0.07673	69379	1.78	129	1276	0	66	1822	1181	1340	39383	23	4712	831	198	3989	278795	184	274	1059	700	138	0	0	157	361	290	2764	98	147	30	156	422	46	897	213	1457	996	1754	38915	15215	0.12	54130
7.2	127.9	8.44	1	0.010269	-0.010571	0.009935	0.07673	86532	1.95	168	1578	0	78	2172	1027	1663	44626	90	5909	936	348	4971	371114	0	229	1637	710	122	67	0	43	405	324	3135	111	164	54	106	373	55	1271	133	2464	1462	2153	42604	16862	0.129	59466
7.3	128.9	8.45	1	0.010269	-0.010571	0.009935	0.07673	79859	2.02	195	1504	0	63	2243	1149	1561	46046	8	5452	913	340	4221	334180	382	249	1244	784	214	0	0	42	300	213	2817	97	163	86	142	529	135	1250	243	1664	1404	2132	40283	15982	0.125	56265
7.4	129.9	8.47	1	0.010269	-0.010571	0.009935	0.07673	80209	1.93	166	1319	0	60	2438	1130	1488	43847	0	5562	924	180	4499	335341	0	161	1197	635	203	36	0	71	381	300	3040	51	133	40	78	490	112	1146	216	2088	1201	2356	41152	16293	0.124	57445
7.5	130.9	8.48	1	0.010269	-0.010571	0.009935	0.07673	80605	1.91	118	1447	0	74	2267	1233	1606	42677	0	5736	971	263	4391	345363	169	292	1212	669	213	0	43	10	331	17	3170	143	25	77	140	448	0	1362	623	2002	1347	1820	39402	16260	0.124	55662
7.6	131.9	8.47	1	0.010269	-0.010571	0.009935	0.07673	79356	1.96	157	1292	0	71	2267	1134	1547	42847	0	5546	829	340	4708	335519	237	300	1069	655	136	0	0	59	340	244	2703	40	10	112	146	453	20	1167	127	1968	1180	1646	40744	15883	0.124	56627
7.7	132.9	8.44	1	0.010269	-0.010571	0.009935	0.07673	82102	1.91	201	1461	0	65	2389	1105	1732	45378	0	5731	917	303	4587	350351	117	201	1254	725	55	13	68	0	381	237	3034	162	201	71	118	468	66	1157	362	2178	1232	1938	40911	16411	0.124	57322
7.8	133.9	8.45	1	0.010269	-0.010571	0.009935	0.07673	76694	1.81	126	1256	0	94	2405	1176	1415	42452	0	5300	907	152	4193	320492	139	153	1119	634	89	91	0	0	407	85	2679	106	59	68	116	401	30	921	429	1898	1176	1667	40290	15598	0.123	55888
7.9	134.9	8.47	1	0.010269	-0.010571	0.009935	0.07673	77470	1.73	104	1238	0	132	2655	1101	1556	55611	0	5016	873	229	3886	304230	74	249	1254	652	41	35	0	54	504	122	5691	59	283	86	217	561	115	911	319	1788	1160	1898	42100	15916	0.125	58016
8	135.9	8.48	1	0.010269	-0.010571	0.009935	0.07673	76182	1.84	110	1209	0	22	2266	1228	1408	40700	121	5048	834	239	4028	314532	0	170	1228	695	21	33	0	21	508	138	2901	99	153	29	88	392	109	986	445	1800	1093	2134	40439	16110	0.124	56549
8.1	136.9	8.48	1	0.010269	-0.010571	0.009935	0.07673	83155	2.04	126	1368	0	57	2537	1234	1582	53149	9	5978	1072	206	4391	342884	0	246	1147	710	89	0	0	101	417	103	2909	0	29	106	101	418	27	1031	557	2116	1228	2716	42398	16545	0.128	58943
8.2	137.9	8.46	1	0.010269	-0.010571	0.009935	0.07673	82604	1.81	147	1486	0	44	2154	1202	1917	48710	5	5424	881	334	4542	337968	90	425	1092	778	121	27	0	90	397	153	3206	197	123	41	29	445	41	1178	310	1879	1170	2214	43918	17119	0.128	61037
8.3	138.9	8.45	1	0.010269	-0.010571	0.009935	0.07673	86786	2.06	167	1469	0	101	2188	1152	1939	43554	12	5105	899	254	4383	378093	0	182	1098	650	26	0	0	0	426	329	2733	31	154	83	77	331	169	1142	383	2419	1356	2775	43325	17281	0.129	60606
8.4	139.9	8.44	1	0.010269	-0.010571	0.009935	0.07673	77811	1.82	160	1286	0	39	2179	1087	1455	37785	0	5287	797	307	3998	320603	372	238	1213	642	119	0	0	39	407	0	3080	220	0	91	128	444	86	1023	602	1892	1120	1497	43435	16605	0.127	60040
8.5	140.9	8.43	1	0.010269	-0.010571	0.009935	0.07673	90519	1.9	140	1457	0	91	3180	1127	1785	64352	27	5748	998	311	4743	358691	128	280	1257	748	130	18	0	0	583	330	3399	0	0	101	155	560	51	1391	140	2154	1253	1903	47819	17632	0.135	65451
8.6	141.9	8.41	1	0.010269	-0.010571	0.009935	0.07673	67039	1.69	85	1062	0	79	1884	1214	1162	47656	24	3902	664	249	3453	251795	296	228	772	641	132	0	0	76	387	126	3860	291	9	38	84	404	0	834	471	1242	900	1393	42230	15475	0.121	57705
8.7	142.9	8.4	1	0.010269	-0.010571	0.009935	0.07673	85835	1.85	169	1260	0	105	2592	1027	1582	44917	68	5201	879	217	4539	336286	0	269	1100	655	78	0	0	56	641	303	3176	17	309	66	132	397	0	1212	407	2061	1327	2232	50305	17640	0.135	67945
8.8	143.9	8.41	1	0.010269	-0.010571	0.009935	0.07673	82704	1.86	156	1213	0	78	2725	1098	1542	42132	31	5045	838	194	4307	319640	127	242	1133	687	84	0	0	0	672	230	3316	126	100	27	99	458	112	875	360	1741	1098	2287	50401	16899	0.133	67300
8.9	144.9	8.41	1	0.010269	-0.010571	0.009935	0.07673	73347	1.73	91	1128	0	86	2975	1131	1658	36060	42	4672	725	276	3691	283035	131	230	943	503	134	0	0	0	612	222	2917	240	156	58	258	413	100	739	237	1802	944	1465	45006	15395	0.125	60401
9	145.9	8.39	1	0.010269	-0.010571	0.009935	0.07673	81538	1.92	160	1226	0	165	3524	1036	1614	43157	43	4907	788	260	4330	302697	225	142	1082	640	182	0	0	200	900	195	3012	0	232	53	257	632	42	918	377	1658	951	1640	48628	17058	0.133	65686
9.1	146.9	8.39	1	0.010269	-0.010571	0.009935	0.07673	69409	1.76	137	1176	0	172	2798	1167	1363	43051	71	4243	691	254	3683	269260	0	165	838	539	96	98	0	13	587	76	2813	84	154	143	216	364	176	782	421	1917	911	1334	39150	15107	0.121	54257
9.2	147.9	8.42	1	0.010269	-0.010571	0.009935	0.07673	86006	1.87	160	1321	0	67	3077	1099	1499	46136	51	5400	930	257	4470	346323	53	273	1130	756	86	0	0	0	601	350	3720	86	0	76	194	471	46	1156	32	1938	1233	2405	46987	18133	0.133	65120
9.3	148.9	8.41	1	0.010269	-0.010571	0.009935	0.07673	88216	1.97	168	1515	0	52	3645	1063	1865	51918	106	5848	837	323	4914	365582	0	253	1306	772	135	0	0	32	620	338	3283	85	29	125	148	537	43	1301	207	2324	1368	2536	44383	16686	0.13	61069
9.4	149.9	8.41	1	0.010269	-0.010571	0.009935	0.07673	65131	1.78	107	1070	0	90	2513	1143	1318	35165	40	4448	775	220	3540	266449	81	279	849	633	102	0	0	19	390	244	2425	81	87	65	131	402	120	880	229	1673	925	1391	36399	14234	0.116	50633
9.5	150.9	8.42	1	0.010269	-0.010571	0.009935	0.07673	78801	1.72	125	1277	0	109	3047	1195	1572	43257	0	4989	815	198	4065	316616	0	235	1109	574	0	0	0	0	506	320	2989	49	253	52	150	586	99	865	98	2036	1115	1958	43644	16493	0.126	60137
9.6	151.9	8.41	1	0.010269	-0.010571	0.009935	0.07673	84738	1.96	150	1399	0	97	3413	1132	1618	45261	13	5875	891	303	4642	352902	59	244	1213	764	70	0	0	0	591	110	2850	92	0	77	158	501	23	1274	404	2160	1347	1660	43745	16565	0.129	60310
9.7	152.9	8.41	1	0.010269	-0.010571	0.009935	0.07673	79007	1.8	150	1101	0	123	3753	1107	1383	60059	0	4731	768	243	4143	304480	0	252	996	620	86	0	0	23	723	242	4848	202	102	0	87	532	213	1115	291	1668	1190	2670	43873	16906	0.128	60779
9.8	153.9	8.39	1	0.010269	-0.010571	0.009935	0.07673	87843	1.97	184	1395	0	161	4186	1178	1764	61557	0	5511	1010	207	4807	357930	44	205	1164	710	40	0	0	75	638	174	3868	212	238	124	226	503	25	1450	303	1932	1231	2434	43880	17071	0.131	60951
9.9	154.9	8.41	1	0.010269	-0.010571	0.009935	0.07673	80854	1.84	148	1375	0	128	3893	1115	1676	46932	0	5378	853	233	5264	336643	40	129	1095	710	148	0	0	63	505	158	3057	198	126	0	139	461	54	1156	464	2078	1211	1732	41255	16694	0.126	57949
10	155.9	8.38	1	0.010269	-0.010571	0.009935	0.07673	80241	1.94	125	1309	0	139	3595	1123	1594	42060	86	5313	915	456	5037	338069	168	258	1102	773	237	0	0	44	483	223	2900	169	202	102	57	419	59	1208	215	2036	1305	1799	41039	16445	0.126	57484
10.1	156.9	8.39	1	0.010269	-0.010571	0.009935	0.07673	92995	1.95	148	1621	0	199	5267	1147	1792	51305	109	6158	976	287	4936	378833	0	181	1382	906	156	0	0	149	708	350	3878	242	114	86	196	567	25	1469	451	2056	1452	2571	48762	18808	0.137	67570
10.2	157.9	8.32	1	0.010269	-0.010571	0.009935	0.07673	90665	1.85	150	1460	0	116	3923	1141	1828	48856	0	6188	1055	248	5432	378611	0	229	1495	800	180	0	0	30	726	19	3514	246	89	88	27	495	0	1318	581	2033	1443	2733	45311	17642	0.133	62953
10.3	158.9	8.31	1	0.010269	-0.010571	0.009935	0.07673	66119	1.55	122	1190	0	128	2541	1307	1269	33223	44	4493	725	221	3554	271714	19	211	993	552	91	0	0	0	251	200	2497	166	70	123	28	400	55	762	145	1610	1011	1677	37229	14682	0.12	51911
10.4	159.9	8.27	1	0.010269	-0.010571	0.009935	0.07673	30589	1.68	28	52	0	0	376	831	62	1887	21	244	89	0	384	49324	0	202	399	247	0	0	0	0	327	333	2546	325	276	15	49	100	104	217	77	7	235	2383	38883	14992	0.141	53875
10.5	160.9	8.23	1	0.010269	-0.010571	0.009935	0.07673	55218	3.93	38	87	0	78	99458	383	55	52038	396	4836	0	0	227	43509	0	246	547	4569	0	97	35	204	741	15	2795	0	264	553	212	651	128	383	447	111	0	4048	48730	19712	0.138	68442
10.6	161.9	8.36	1	0.010269	-0.010571	0.009935	0.07673	64717	5.24	28	47	0	68	158039	1013	0	81507	582	7573	0	0	108	30086	0	233	1182	6511	42	31	151	183	555	5	2758	0	125	918	275	881	83	161	175	245	0	3915	50801	19158	0.135	69959
10.7	162.9	8.39	1	0.010269	-0.010571	0.009935	0.07673	80478	4.93	89	41	0	28	133669	962	0	69124	402	6437	0	0	96	16961	0	589	1160	7162	0	0	0	0	262	373	2578	343	178	758	219	569	132	361	134	0	66	1368	105371	19820	0.176	125191

## Sheet: SW-33
Depth	position (mm)	sample surface	validity	E-gain	E-offset	F-slope	F-offset	cps	MSE	Al	Si	P	S	Cl	Ar	K	Ca	Sc	Ti	V	Cr	Mn	Fe	Co	Ni	Cu	Zn	Ga	Ge	As	Se	Br	Rb	Sr	Y	Zr	Ba	Ta	W	Pb	Fe a*2	Fe a+b	S1	S2	S3	Mo inc	Mo coh	Dt	Inc+coh
0	112.01	7.71	1	0.010269	-0.010571	0.009935	0.07673	99804	1.84	79	743	0	186	4273	1096	1544	31148	13	4517	715	208	3715	291565	938	336	1132	475	0	0	0	173	2412	0	2245	0	0	0	442	652	203	1203	612	1585	1329	695	85902	19542	0.164	105444
0.1	113.01	7.7	1	0.010269	-0.010571	0.009935	0.07673	102979	2.01	99	978	0	117	3334	1113	1988	43759	20	6080	1001	367	5359	396978	380	277	1479	856	133	46	0	149	921	257	3175	27	121	48	170	647	52	1464	301	2345	1549	1803	59137	18962	0.15	78099
0.2	114.01	7.67	1	0.010269	-0.010571	0.009935	0.07673	92652	1.81	115	869	0	106	2685	1092	1736	38278	0	5669	965	262	4538	359780	0	187	1237	724	89	0	0	0	866	261	3268	82	251	0	166	530	189	1269	502	2124	1440	2414	53461	18230	0.141	71691
0.3	115.01	7.67	1	0.010269	-0.010571	0.009935	0.07673	95365	1.79	91	849	0	135	3063	1102	1742	37839	11	5352	968	226	4615	370071	168	173	1219	745	63	0	0	93	948	195	3423	44	4	101	324	558	0	1504	443	2269	1302	2264	55022	18769	0.143	73791
0.4	116.01	7.67	1	0.010269	-0.010571	0.009935	0.07673	95574	1.85	103	809	0	113	3071	1146	1765	37413	42	5516	918	231	4770	371645	0	223	1251	770	58	59	0	65	925	166	3405	97	171	57	135	632	64	1322	498	2316	1356	3261	56145	18705	0.143	74850
0.5	117.01	7.67	1	0.010269	-0.010571	0.009935	0.07673	97555	1.83	78	860	0	96	3402	1053	1813	38613	164	5662	988	281	4956	381053	275	277	1300	801	85	0	0	0	829	275	3327	0	110	35	252	611	154	1355	258	2352	1422	2284	55767	19045	0.144	74812
0.6	118.01	7.68	1	0.010269	-0.010571	0.009935	0.07673	97151	1.85	132	846	0	104	2946	1118	1839	39677	7	5867	984	318	5328	381982	248	275	1306	858	110	6	0	141	972	281	3469	54	309	44	226	625	91	1453	328	2245	1411	2421	54459	18911	0.144	73370
0.7	119.01	7.68	1	0.010269	-0.010571	0.009935	0.07673	98775	1.9	135	1073	0	93	2762	1014	1880	41366	107	6020	1037	276	5687	390782	0	246	1423	768	157	0	0	137	849	88	3385	71	119	105	122	727	152	1481	680	2216	1429	3603	55126	18518	0.144	73644
0.8	120.01	7.68	1	0.010269	-0.010571	0.009935	0.07673	100149	1.95	132	1122	0	112	2662	1031	1993	42592	35	6174	1078	261	5540	398672	166	226	1308	820	141	70	0	0	907	211	3376	77	313	63	253	627	201	1702	669	2466	1516	2083	54405	19143	0.145	73548
0.9	121.01	7.68	1	0.010269	-0.010571	0.009935	0.07673	100187	1.95	112	939	0	129	2916	992	1913	41896	0	6026	1002	259	5142	396679	0	180	1330	818	176	0	0	83	919	171	3527	39	184	65	205	523	93	1625	613	2418	1522	3289	55645	19031	0.145	74676
1	122.01	7.68	1	0.010269	-0.010571	0.009935	0.07673	98280	1.88	79	795	0	127	3407	1073	1757	38957	22	5674	862	293	4925	383999	0	224	1374	767	137	8	105	73	1028	80	3528	49	265	57	271	589	42	1494	725	2462	1359	2359	56314	19336	0.145	75650
1.1	123.01	7.69	1	0.010269	-0.010571	0.009935	0.07673	97182	1.81	104	811	0	98	3251	1033	1771	38169	82	5614	1148	273	4830	379417	21	208	1353	792	108	12	0	91	966	107	3557	60	208	21	204	652	104	1577	588	2076	1431	2634	55181	19045	0.144	74226
1.2	124.01	7.69	1	0.010269	-0.010571	0.009935	0.07673	96986	1.79	126	840	0	105	3247	1090	1707	38793	19	5596	999	232	4735	379119	296	227	1368	731	197	0	73	55	874	158	3323	0	49	46	180	597	50	1295	349	2204	1404	2156	55370	19203	0.144	74573
1.3	125.01	7.69	1	0.010269	-0.010571	0.009935	0.07673	98471	1.85	109	947	0	97	3143	1078	1804	40122	8	5938	1000	290	4779	387669	128	298	1419	808	177	31	19	51	859	342	3569	67	153	69	270	681	79	1541	132	2161	1396	2595	54546	19071	0.144	73617
1.4	126.01	7.69	1	0.010269	-0.010571	0.009935	0.07673	98294	1.87	97	866	0	124	3315	1014	1821	39236	0	5834	1016	255	4646	386310	117	251	1372	775	185	0	66	0	844	164	3673	39	76	41	234	766	98	1363	457	2354	1589	2330	55237	19177	0.145	74414
1.5	127.01	7.69	1	0.010269	-0.010571	0.009935	0.07673	97060	1.7	137	742	0	120	3334	962	1783	38597	60	5869	1028	194	4434	378798	251	200	1281	728	171	14	186	0	884	212	3637	0	35	15	201	646	0	1307	545	2232	1512	2284	55459	19108	0.144	74567
1.6	128.01	7.69	1	0.010269	-0.010571	0.009935	0.07673	97363	1.87	97	780	0	114	3339	1049	1810	38711	29	5791	885	241	4638	382449	0	260	1241	672	183	0	0	49	1007	62	3718	0	21	0	234	687	140	1326	533	2171	1482	2941	54592	19001	0.144	73593
1.7	129.01	7.69	1	0.010269	-0.010571	0.009935	0.07673	97744	1.84	100	779	0	110	3137	1033	1872	39582	52	5760	1006	295	4703	385349	0	295	1265	753	165	0	0	0	802	141	3433	86	86	0	265	651	0	1304	461	2339	1477	2470	55400	19186	0.144	74586
1.8	130.01	7.69	1	0.010269	-0.010571	0.009935	0.07673	98779	1.88	147	945	0	53	2937	1061	1903	41283	85	5967	1044	260	4747	391953	30	269	1336	790	79	40	180	113	842	169	3511	0	52	49	214	569	0	1397	302	2395	1409	2503	54090	18827	0.144	72917
1.9	131.01	7.69	1	0.010269	-0.010571	0.009935	0.07673	98335	1.97	116	1003	0	64	2755	1002	1955	41057	0	5939	1018	291	4772	390925	291	234	1288	858	130	0	78	88	927	408	3549	5	152	0	241	674	0	1555	286	2139	1549	2131	53944	18615	0.143	72559
2	132.01	7.7	1	0.010269	-0.010571	0.009935	0.07673	98675	1.96	143	1108	0	77	2662	1056	1896	42031	0	5960	1011	306	4839	393141	0	249	1232	790	138	0	0	55	890	106	3547	0	39	59	240	551	170	1599	614	2407	1346	2896	54385	19133	0.144	73518
2.1	133.01	7.7	1	0.010269	-0.010571	0.009935	0.07673	99593	2.01	152	1179	0	101	2517	1121	2006	42881	60	6142	969	324	4824	396967	13	268	1321	742	121	0	77	204	870	214	3482	79	95	74	222	624	60	1572	591	2316	1432	2708	54651	18984	0.145	73635
2.2	134.01	7.7	1	0.010269	-0.010571	0.009935	0.07673	98192	1.98	141	1030	0	114	2663	1085	1908	42162	68	6240	993	304	4784	390880	0	168	1255	749	23	0	12	47	874	104	3501	0	166	46	204	616	7	1466	602	2547	1445	2353	54497	18362	0.143	72859
2.3	135.01	7.7	1	0.010269	-0.010571	0.009935	0.07673	99093	1.95	146	1127	0	120	2446	1073	1961	43265	55	5958	1013	303	4735	395113	0	315	1307	744	204	0	0	78	899	140	3421	0	0	36	201	651	188	1586	549	2436	1553	2462	54983	18504	0.144	73487
2.4	136.01	7.7	1	0.010269	-0.010571	0.009935	0.07673	99969	1.92	125	1241	0	76	2285	1063	2089	43781	27	6392	1082	299	4808	399376	50	225	1253	776	71	38	90	149	764	446	3505	4	278	0	230	625	0	1550	267	2223	1543	2863	54554	19006	0.144	73560
2.5	137.01	7.7	1	0.010269	-0.010571	0.009935	0.07673	99777	1.92	100	1211	0	53	2337	1060	1988	43690	0	6057	1011	284	4842	398674	0	224	1225	777	11	58	0	78	830	130	3624	0	130	69	367	523	101	1504	633	2557	1563	2627	54201	18801	0.144	73002
2.6	138.01	7.7	1	0.010269	-0.010571	0.009935	0.07673	99697	2.01	140	1169	0	84	2508	1049	2013	43639	26	6248	1065	307	4823	397812	0	222	1307	757	28	19	59	0	902	292	3494	0	0	67	223	458	0	1682	477	2334	1616	2890	54390	18822	0.144	73212
2.7	139.01	7.7	1	0.010269	-0.010571	0.009935	0.07673	99226	1.93	141	1112	0	79	2608	1070	1898	42775	28	6161	1033	298	4832	393504	433	187	1328	775	195	0	183	96	837	196	3719	119	0	72	154	592	0	1576	421	2251	1496	2290	55228	18799	0.144	74027
2.8	140.01	7.7	1	0.010269	-0.010571	0.009935	0.07673	98853	1.92	105	1142	0	85	2508	1118	1899	42977	0	6103	1032	257	4816	392973	0	255	1288	750	115	0	0	114	930	220	3695	92	125	85	170	647	41	1784	377	2304	1472	2893	54136	18821	0.143	72957
2.9	141.01	7.7	1	0.010269	-0.010571	0.009935	0.07673	99799	1.94	164	1139	0	62	2423	1030	2031	43205	89	6201	1156	241	4970	396680	26	306	1388	828	72	48	0	0	859	358	3661	0	0	24	274	580	134	1476	368	2518	1464	2466	55276	19030	0.144	74306
3	142.01	7.7	1	0.010269	-0.010571	0.009935	0.07673	98220	1.9	138	1106	0	97	2740	1030	1890	42757	60	6084	982	292	4805	388940	89	264	1324	710	213	39	100	203	988	224	3507	0	117	97	192	631	80	1353	250	2493	1467	2266	54228	18986	0.143	73214
3.1	143.01	7.7	1	0.010269	-0.010571	0.009935	0.07673	98155	1.92	104	1174	0	89	2636	1171	1976	42848	79	6071	1104	325	4834	389841	262	192	1309	867	136	0	0	85	954	92	3399	51	105	59	234	725	153	1499	510	2397	1500	2031	54583	18574	0.143	73157
3.2	144.01	7.7	1	0.010269	-0.010571	0.009935	0.07673	99165	1.83	141	1106	0	97	2658	1074	1874	43044	139	6196	951	317	4897	393769	10	259	1256	649	77	0	10	41	900	64	3658	0	0	58	275	500	31	1370	518	2431	1510	2425	54827	19189	0.144	74016
3.3	145.01	7.69	1	0.010269	-0.010571	0.009935	0.07673	99017	1.87	150	1141	0	137	2745	1157	1934	42685	58	6170	1020	271	5014	392059	0	270	1326	806	125	71	0	93	1060	334	3630	0	74	78	250	751	105	1526	386	2504	1641	2612	55809	18856	0.144	74665
3.4	146.01	7.7	1	0.010269	-0.010571	0.009935	0.07673	99072	1.92	146	1102	0	117	2728	1036	1943	42413	50	6074	873	267	4971	391342	0	320	1289	839	120	79	0	28	1040	140	3579	0	134	103	276	604	186	1385	732	2461	1422	3201	54423	18899	0.144	73322
3.5	147.01	7.69	1	0.010269	-0.010571	0.009935	0.07673	98960	1.99	153	1112	0	59	2743	1196	1761	42679	0	6011	1018	309	4873	392508	0	258	1285	837	0	0	79	152	928	277	3478	149	39	47	358	534	54	1722	486	2454	1514	2564	55594	19141	0.144	74735
3.6	148.01	7.69	1	0.010269	-0.010571	0.009935	0.07673	98880	1.98	182	1213	0	130	2656	1092	2036	44745	151	6206	1031	260	5078	394312	0	212	1340	647	164	0	0	112	965	70	3577	63	82	50	136	700	56	1534	571	2527	1534	2600	53359	18887	0.143	72246
3.7	149.01	7.69	1	0.010269	-0.010571	0.009935	0.07673	95731	1.84	103	1207	26	100	2300	1136	1828	43478	44	6081	936	272	4745	380565	311	262	1420	741	190	0	93	96	841	143	3474	0	93	98	194	675	37	1063	525	2219	1411	2114	52959	18632	0.141	71591
3.8	150.01	7.69	1	0.010269	-0.010571	0.009935	0.07673	98212	1.89	136	1227	0	60	2220	1145	2009	44707	0	6258	1042	314	5003	392302	28	277	1461	806	155	0	0	0	829	213	3646	0	61	106	242	658	295	1482	342	2466	1486	2363	53211	18835	0.143	72046
3.9	151.01	7.69	1	0.010269	-0.010571	0.009935	0.07673	96627	2	144	1264	0	56	2223	1133	1969	43998	47	6303	921	328	4820	384845	0	252	1309	816	71	34	53	114	876	327	3485	18	23	78	186	599	85	1386	284	2581	1456	2556	53229	18818	0.142	72047
4	152.01	7.69	1	0.010269	-0.010571	0.009935	0.07673	97594	1.73	119	1201	0	82	2347	1053	1950	42627	27	5878	1074	241	4821	385699	0	267	1190	771	23	0	0	45	1048	83	3676	8	69	59	314	618	159	1397	543	2456	1540	3383	54580	18780	0.143	73360
4.1	153.01	7.69	1	0.010269	-0.010571	0.009935	0.07673	97418	1.88	119	1058	0	76	2564	1051	1766	42448	93	5996	1056	334	4689	385824	0	332	1323	768	187	0	107	62	856	143	3490	0	0	26	194	649	19	1671	433	2407	1442	2931	54547	19125	0.143	73672
4.2	154.01	7.69	1	0.010269	-0.010571	0.009935	0.07673	97675	1.92	136	1168	0	120	2498	1172	1880	42626	0	5989	968	262	4787	387461	0	310	1220	743	119	0	33	117	850	0	3489	0	62	50	277	698	0	1421	796	2371	1623	2416	54441	18621	0.143	73062
4.3	155.01	7.68	1	0.010269	-0.010571	0.009935	0.07673	99265	1.96	119	1152	0	77	2377	1067	1877	44725	0	6245	1021	332	4873	396315	53	227	1381	802	125	0	0	160	873	7	3431	129	184	69	224	610	0	1515	709	2350	1579	2529	54031	19175	0.143	73206
4.4	156.01	7.68	1	0.010269	-0.010571	0.009935	0.07673	98530	1.99	125	1204	0	52	2264	1094	1920	44516	9	6207	1033	301	5003	394124	226	193	1240	760	211	0	158	35	808	242	3459	28	29	30	139	670	0	1491	575	2454	1522	2290	53577	18717	0.143	72294
4.5	157.01	7.68	1	0.010269	-0.010571	0.009935	0.07673	95383	1.81	162	1188	0	112	2392	1107	1857	43950	42	5900	992	218	4760	379356	86	257	1327	729	36	14	184	17	810	73	3358	93	66	70	307	613	0	1413	491	2201	1499	2362	52893	18311	0.141	71204
4.6	158.01	7.68	1	0.010269	-0.010571	0.009935	0.07673	94021	1.77	159	970	0	86	2777	1039	1755	41094	0	5472	891	238	4685	369796	66	228	1198	720	194	0	39	106	678	213	3510	22	30	139	241	708	144	1372	358	2256	1404	2512	53203	18691	0.141	71894
4.7	159.01	7.68	1	0.010269	-0.010571	0.009935	0.07673	94305	1.85	139	925	0	116	3092	1088	1667	40158	30	5677	933	288	4665	367694	0	261	1240	753	78	37	0	47	940	157	3681	210	0	13	263	447	239	1241	489	2241	1390	2736	54597	18776	0.142	73373
4.8	160.01	7.68	1	0.010269	-0.010571	0.009935	0.07673	95119	1.86	117	943	0	111	3009	1127	1722	39766	66	5747	1020	185	4647	373557	0	236	1260	673	58	30	0	0	945	179	3107	61	102	42	217	563	178	1322	339	2222	1454	2579	53765	18800	0.142	72565
4.9	161.01	7.68	1	0.010269	-0.010571	0.009935	0.07673	95736	1.9	159	1007	0	67	3103	1136	1848	40392	46	5639	977	255	4809	376873	0	264	1293	747	89	0	0	83	785	379	3261	25	0	41	196	647	104	1613	333	2227	1406	2853	54048	18705	0.142	72753
5	162.01	7.68	1	0.010269	-0.010571	0.009935	0.07673	94960	1.79	129	922	0	93	3130	1017	1815	41498	111	5573	1016	307	4764	374459	7	250	1218	740	175	22	0	92	910	62	3767	0	0	53	346	649	96	1214	390	2347	1461	2424	52992	18720	0.141	71712
5.1	163.01	7.68	1	0.010269	-0.010571	0.009935	0.07673	95894	1.82	123	929	0	96	3040	1183	1731	41065	69	5644	1003	254	4793	377564	0	315	1216	788	84	0	184	99	854	341	3458	0	64	119	268	640	29	1544	316	2368	1266	2667	53645	18935	0.142	72580
5.2	164.01	7.68	1	0.010269	-0.010571	0.009935	0.07673	96065	1.8	157	1013	0	102	3161	1089	1766	41464	0	5693	931	235	4769	377772	141	208	1220	840	81	50	84	127	897	242	3610	46	183	91	204	545	55	1503	344	2363	1442	2310	53208	18928	0.143	72136
5.3	165.01	7.68	1	0.010269	-0.010571	0.009935	0.07673	96561	1.79	155	1032	0	97	3152	1100	1812	42772	84	5749	1025	226	4840	378606	0	215	1281	675	109	0	0	48	1043	103	3675	14	231	35	208	661	96	1417	610	2214	1497	2810	52656	18801	0.142	71457
5.4	166.01	7.68	1	0.010269	-0.010571	0.009935	0.07673	96370	1.82	99	984	0	106	3060	1129	1902	42260	54	5867	957	309	4737	376426	0	260	1371	853	180	0	0	25	897	159	3693	0	92	57	187	643	240	1307	542	2099	1458	3030	54406	18800	0.143	73206
5.5	167.01	7.67	1	0.010269	-0.010571	0.009935	0.07673	96744	1.82	153	1008	0	81	2936	1132	1881	42051	25	5938	1114	247	4852	377666	0	334	1314	735	92	0	0	139	964	323	3561	0	88	14	195	562	92	1326	118	2389	1432	2897	54995	18794	0.143	73789
5.6	168.01	7.67	1	0.010269	-0.010571	0.009935	0.07673	96119	1.89	125	1014	0	106	2812	1125	1940	42330	22	5741	855	331	4816	376361	237	271	1348	747	157	22	33	82	891	175	3731	42	12	73	242	671	52	1577	432	2195	1297	1942	54068	18363	0.143	72431
5.7	169.01	7.67	1	0.010269	-0.010571	0.009935	0.07673	96162	1.83	109	1067	0	81	2983	1101	1834	43061	23	6038	973	312	4907	379256	26	193	1201	807	57	0	0	80	840	105	3622	93	144	48	266	618	25	1438	553	2340	1473	2229	53788	19066	0.142	72854
5.8	170.01	7.67	1	0.010269	-0.010571	0.009935	0.07673	96741	1.88	132	1054	0	91	2801	1066	1767	43512	35	5854	1008	276	4873	381559	30	210	1283	759	95	0	102	171	881	128	3491	11	323	82	107	658	0	1468	415	2276	1379	2374	53400	18745	0.143	72145
5.9	171.01	7.66	1	0.010269	-0.010571	0.009935	0.07673	97803	1.91	160	1178	0	85	2621	1092	1960	44552	37	6205	1021	227	4964	389248	0	275	1326	678	99	0	0	86	789	133	3641	96	129	60	106	683	131	1380	594	2301	1443	2975	52954	18930	0.142	71884
6	172.01	7.65	1	0.010269	-0.010571	0.009935	0.07673	98944	1.89	164	1216	0	123	2472	1083	1975	45358	89	6273	1009	236	5032	395225	0	267	1369	787	140	45	19	80	864	347	3530	59	109	77	213	680	12	1566	93	2251	1599	2802	53360	19238	0.143	72598
6.1	173.01	7.65	1	0.010269	-0.010571	0.009935	0.07673	97094	1.93	111	1097	0	115	2595	1136	2017	43721	0	6021	1046	294	4971	385031	0	252	1332	702	76	101	0	69	814	268	3464	0	18	12	194	534	143	1636	499	2521	1500	2371	53718	18870	0.142	72588
6.2	174.01	7.66	1	0.010269	-0.010571	0.009935	0.07673	94334	1.85	126	977	0	84	2602	1112	1815	41222	0	5677	823	253	4699	370332	59	204	1275	789	185	57	0	63	855	360	3360	166	24	53	234	588	45	1385	159	2151	1483	2446	53257	18935	0.141	72192
6.3	175.01	7.65	1	0.010269	-0.010571	0.009935	0.07673	93325	1.82	97	1067	0	121	2558	1145	1667	40617	42	5604	952	225	4716	366089	142	274	1283	771	51	26	0	40	919	54	3383	46	128	34	264	554	133	1461	527	2155	1367	2228	53435	18707	0.141	72142
6.4	176.01	7.65	1	0.010269	-0.010571	0.009935	0.07673	94599	1.79	142	1068	0	103	2689	1109	1741	41748	53	5668	858	254	4684	372422	137	216	1327	759	137	0	124	92	927	356	3560	0	0	70	133	641	59	1397	374	1875	1451	2555	53933	18715	0.142	72648
6.5	177.01	7.65	1	0.010269	-0.010571	0.009935	0.07673	95945	1.9	151	1091	0	79	2718	1072	1975	43108	156	5973	1051	273	4980	378570	0	307	1268	787	38	43	116	34	990	266	3668	0	214	15	191	532	0	1491	191	2261	1442	2578	52419	18823	0.142	71242
6.6	178.01	7.65	1	0.010269	-0.010571	0.009935	0.07673	94691	1.88	157	1002	0	96	2671	1064	1840	41765	86	5610	1006	197	4927	371595	17	336	1316	684	124	6	19	227	782	130	3529	0	75	67	159	593	52	1246	515	2091	1482	3039	53366	18104	0.142	71470
6.7	179.01	7.65	1	0.010269	-0.010571	0.009935	0.07673	94212	1.81	87	1103	0	83	2591	1059	1914	42296	0	5731	1000	281	4861	369700	111	216	1248	760	0	0	0	173	852	90	3782	66	120	66	279	559	62	1219	675	2251	1401	2159	53218	18814	0.141	72032
6.8	180.01	7.64	1	0.010269	-0.010571	0.009935	0.07673	95009	1.91	127	1063	0	95	2700	1107	1846	43169	0	5869	1074	250	4889	373880	0	248	1260	742	157	0	69	141	762	496	3697	0	66	90	105	592	42	1501	68	2151	1360	2838	52841	18610	0.141	71451
6.9	181.01	7.64	1	0.010269	-0.010571	0.009935	0.07673	94729	1.92	143	1150	0	84	2612	1092	1875	42997	55	5901	944	270	4988	373712	0	213	1366	800	155	0	0	143	912	200	3653	152	232	6	103	646	64	1290	553	2430	1397	3049	52846	18963	0.141	71809
7	182.01	7.64	1	0.010269	-0.010571	0.009935	0.07673	92387	1.82	174	1161	0	96	2433	1033	1735	41380	90	5836	956	182	4725	361427	0	249	1319	671	165	23	69	14	738	263	3907	80	102	27	85	517	71	1355	337	2104	1301	2982	53515	18801	0.141	72316
7.1	183.01	7.64	1	0.010269	-0.010571	0.009935	0.07673	97334	1.91	127	1242	0	136	2599	1037	1924	44401	37	6182	852	275	4947	382074	0	253	1341	786	156	88	0	60	1042	151	3776	152	0	42	233	565	157	1632	565	2481	1521	2730	55696	18742	0.144	74438
7.2	184.01	7.63	1	0.010269	-0.010571	0.009935	0.07673	97797	1.95	150	1219	0	99	2608	1123	1904	44957	40	6144	1057	358	5089	389453	56	254	1404	790	152	0	131	36	818	305	3570	25	345	65	239	634	0	1497	272	2350	1473	2387	53048	18867	0.142	71915
7.3	185.01	7.62	1	0.010269	-0.010571	0.009935	0.07673	92594	1.94	139	1116	0	82	2362	1084	1697	42051	0	5724	885	278	4889	364962	0	257	1222	737	68	0	0	0	804	143	3447	46	77	74	210	547	240	1128	423	2394	1462	2892	52083	18135	0.14	70218
7.4	186.01	7.63	1	0.010269	-0.010571	0.009935	0.07673	94119	1.84	137	1157	0	112	2422	1041	1777	42393	48	5854	1049	254	4981	371855	0	210	1265	741	75	0	76	0	767	277	3570	26	25	71	192	610	40	1537	385	2463	1309	2311	53480	18606	0.14	72086
7.5	187.01	7.63	1	0.010269	-0.010571	0.009935	0.07673	93927	1.94	150	1122	0	83	2438	1134	1840	41875	11	5693	853	288	4899	370993	0	240	1247	733	192	50	42	0	910	116	3465	23	175	135	233	555	72	1374	590	2215	1381	2631	53080	18609	0.14	71689
7.6	188.01	7.63	1	0.010269	-0.010571	0.009935	0.07673	92833	1.83	142	1142	0	99	2513	1049	1833	41559	0	5722	997	245	4831	367333	134	271	1216	729	136	0	50	34	788	123	3320	0	36	57	211	602	88	1187	323	2132	1481	2370	51436	18367	0.139	69803
7.7	189.01	7.63	1	0.010269	-0.010571	0.009935	0.07673	94278	1.84	109	1176	0	60	2440	1027	1855	42515	37	5955	868	242	4820	374739	126	269	1355	727	254	9	35	103	768	0	3425	25	0	63	104	671	59	1387	846	1907	1358	2646	52660	18513	0.14	71173
7.8	190.01	7.63	1	0.010269	-0.010571	0.009935	0.07673	96871	1.93	198	1268	0	132	2331	1028	1969	43938	0	6301	945	298	5027	386776	29	266	1348	794	22	0	34	0	807	148	3423	95	130	13	336	595	0	1627	416	2335	1524	2487	52576	18744	0.142	71320
7.9	191.01	7.63	1	0.010269	-0.010571	0.009935	0.07673	95585	1.78	99	1197	0	63	2425	1098	1894	42368	59	5821	1040	221	4890	378992	0	268	1343	710	205	0	0	40	972	249	3445	74	161	111	121	576	69	1641	289	2316	1370	3066	52980	18692	0.141	71672
8	192.01	7.63	1	0.010269	-0.010571	0.009935	0.07673	96777	1.97	189	1280	0	105	2421	1086	1947	43891	0	5986	1031	232	4972	387233	0	290	1295	842	109	114	121	90	852	184	3370	208	43	118	256	538	14	1488	456	2536	1361	2448	53170	18655	0.141	71825
8.1	193.01	7.62	1	0.010269	-0.010571	0.009935	0.07673	88537	1.71	103	1109	0	94	2169	1026	1739	39330	0	5522	857	250	4474	349277	110	261	1262	731	79	83	51	26	710	100	3358	0	0	40	162	490	113	1072	395	2155	1340	1803	51013	17786	0.136	68799
8.2	194.01	7.63	1	0.010269	-0.010571	0.009935	0.07673	95831	1.91	146	1171	0	95	2493	1027	1893	42382	87	5983	986	194	4837	377637	485	255	1456	956	81	0	6	22	939	183	3611	72	0	32	154	599	105	1317	548	1979	1512	1678	54335	18693	0.142	73028
8.3	195.01	7.64	1	0.010269	-0.010571	0.009935	0.07673	94716	1.78	119	1274	0	119	2359	1059	1809	41936	0	5871	988	254	5265	371409	222	193	1305	832	46	24	0	73	908	185	3536	0	55	39	226	571	311	1279	261	2312	1446	2093	54302	18694	0.142	72996
8.4	196.01	7.64	1	0.010269	-0.010571	0.009935	0.07673	94340	1.78	105	1179	0	92	2368	1063	1702	42197	0	5862	863	305	4898	370340	56	239	1287	708	116	0	0	0	884	283	3466	6	163	17	252	627	138	1603	289	2149	1355	2249	53857	18684	0.141	72541
8.5	197.01	7.65	1	0.010269	-0.010571	0.009935	0.07673	93390	1.87	146	1109	0	90	2381	1111	1796	41153	41	5660	1064	206	4856	367594	0	267	1320	822	60	0	0	117	876	253	3426	0	57	60	220	660	10	1339	335	2194	1467	2634	53108	18514	0.14	71622
8.6	198.01	7.65	1	0.010269	-0.010571	0.009935	0.07673	94193	1.83	124	1132	0	97	2439	1074	1891	41953	89	5759	948	200	4887	371383	0	282	1291	722	64	0	31	75	872	276	3525	134	78	58	257	670	42	1498	388	2340	1348	2612	53753	18681	0.141	72434
8.7	199.01	7.65	1	0.010269	-0.010571	0.009935	0.07673	94159	1.87	134	1091	0	74	2362	1199	1820	40910	54	5952	848	235	4658	372061	0	260	1303	843	139	0	91	76	1006	258	3506	59	0	36	217	597	31	1474	528	2226	1291	2859	53750	18305	0.14	72055
8.8	200.01	7.65	1	0.010269	-0.010571	0.009935	0.07673	94967	1.82	94	1145	0	107	2350	1157	1912	40983	43	6017	1003	332	4845	376384	316	222	1469	783	153	80	0	0	904	185	3492	0	61	54	99	570	83	1414	454	2215	1358	1859	53602	18954	0.141	72556
8.9	201.01	7.64	1	0.010269	-0.010571	0.009935	0.07673	96405	1.88	115	1261	0	85	2252	1053	1935	41474	0	6033	963	273	4834	385125	61	284	1384	804	186	0	0	0	879	253	3416	0	48	63	233	627	25	1512	292	2410	1441	2076	52852	18738	0.142	71590
9	202.01	7.65	1	0.010269	-0.010571	0.009935	0.07673	95164	1.96	143	1199	0	53	2097	1111	1868	41772	0	5901	910	266	4846	378068	0	204	1251	804	131	40	0	44	919	173	3659	0	0	0	227	540	194	1481	422	2231	1445	3218	52684	18075	0.141	70759
9.1	203.01	7.65	1	0.010269	-0.010571	0.009935	0.07673	95001	1.86	137	1203	0	103	2068	1102	1971	41612	32	5912	969	258	4915	376717	49	272	1337	682	29	0	0	20	758	224	3518	87	283	67	235	555	171	1373	503	2242	1359	2412	52629	18337	0.141	70966
9.2	204.01	7.65	1	0.010269	-0.010571	0.009935	0.07673	96193	1.91	156	1289	0	111	2110	1128	1942	42847	74	6039	890	292	4949	381611	0	196	1298	644	8	0	5	68	823	96	3395	0	0	92	308	557	95	1272	450	2550	1359	3395	54369	18878	0.142	73247
9.3	205.01	7.65	1	0.010269	-0.010571	0.009935	0.07673	94057	1.83	129	1254	0	78	2019	1137	1828	42065	58	5950	909	337	4720	371540	0	260	1238	769	76	67	0	42	872	107	3526	31	161	21	207	532	71	1372	405	2191	1457	2801	53506	18577	0.141	72083
9.4	206.01	7.65	1	0.010269	-0.010571	0.009935	0.07673	94031	1.87	144	1192	0	87	2169	1081	1886	42131	8	5782	980	252	4697	370725	0	236	1278	774	42	0	0	82	828	261	3435	41	142	107	206	562	54	994	431	2107	1572	2789	52947	18246	0.141	71193
9.5	207.01	7.66	1	0.010269	-0.010571	0.009935	0.07673	92409	1.82	153	1117	0	86	2170	1112	1820	40681	80	5784	965	229	4692	363195	0	250	1289	767	75	0	59	70	818	27	3437	37	11	44	256	514	114	1323	726	2164	1451	2577	52230	18266	0.14	70496
9.6	208.01	7.66	1	0.010269	-0.010571	0.009935	0.07673	91077	1.88	119	1133	0	85	2210	1114	1738	40314	89	5590	958	218	4621	357941	0	198	1217	812	19	28	10	0	896	136	3394	119	251	121	299	509	61	1185	409	2114	1389	2468	51732	18346	0.139	70078
9.7	209.01	7.66	1	0.010269	-0.010571	0.009935	0.07673	92527	1.86	126	1149	0	128	2255	1183	1807	41307	0	5875	968	242	4722	365131	0	298	1192	694	0	71	0	0	999	146	3323	130	75	16	253	451	181	1318	379	2302	1440	3246	52342	18312	0.139	70654
9.8	210.01	7.66	1	0.010269	-0.010571	0.009935	0.07673	91851	1.87	112	1154	0	101	2243	1092	1759	40335	79	5656	1056	271	4655	361701	0	251	1251	743	56	0	0	132	790	304	3542	14	250	0	224	587	7	1412	322	2187	1362	2791	51961	18300	0.139	70261
9.9	211.01	7.66	1	0.010269	-0.010571	0.009935	0.07673	93642	1.79	138	1193	0	61	2352	1119	1723	41262	59	5805	1002	260	4860	372066	239	212	1367	794	59	51	87	32	987	248	3456	38	0	21	123	586	41	1302	345	2148	1554	2087	52651	18627	0.14	71278
10	212.01	7.66	1	0.010269	-0.010571	0.009935	0.07673	94675	1.86	99	1130	0	80	2408	1045	1790	41544	78	6000	859	299	4743	376656	0	232	1306	706	40	0	76	79	899	23	3537	0	91	44	388	459	104	1422	559	2295	1284	2816	51890	18183	0.14	70073
10.1	213.01	7.66	1	0.010269	-0.010571	0.009935	0.07673	93749	1.79	159	1173	0	99	2441	1132	1829	41157	13	5794	937	267	4840	373600	0	213	1399	717	149	21	75	65	916	330	3566	104	147	66	168	636	83	1505	449	2380	1409	2618	52307	18528	0.139	70835
10.2	214.01	7.66	1	0.010269	-0.010571	0.009935	0.07673	94516	1.77	124	1182	0	135	2464	1120	1861	41649	84	5803	935	260	4764	377403	0	265	1223	747	96	35	0	57	863	92	3473	0	157	88	259	547	70	1436	648	2407	1426	2830	51238	18350	0.14	69588
10.3	215.01	7.67	1	0.010269	-0.010571	0.009935	0.07673	94257	1.88	145	1216	0	119	2305	1088	1888	41940	0	5833	896	284	4723	376629	0	216	1383	738	172	0	161	0	870	250	3489	44	172	60	205	599	0	1546	329	2559	1402	3142	51775	18249	0.139	70024
10.4	216.01	7.67	1	0.010269	-0.010571	0.009935	0.07673	93477	1.85	152	1232	13	120	2399	1198	1863	41492	0	5901	954	339	4655	373859	112	269	1271	756	83	63	0	182	859	29	3336	61	9	97	170	594	128	1029	475	2104	1454	2233	51234	18212	0.139	69446
10.5	217.01	7.67	1	0.010269	-0.010571	0.009935	0.07673	94435	1.8	175	1293	0	103	2297	1149	1881	42899	5	6028	970	256	4962	379781	78	294	1386	863	173	0	84	160	698	346	3588	69	0	60	202	616	0	1504	415	2254	1433	2373	51465	18458	0.139	69923
10.6	218.01	7.67	1	0.010269	-0.010571	0.009935	0.07673	94624	1.87	155	1329	0	84	2293	1143	1888	43573	0	5862	1102	273	5029	380791	0	203	1355	757	115	54	117	64	793	225	3499	58	140	71	231	648	61	1618	516	2193	1473	2823	50843	18434	0.139	69277
10.7	219.01	7.67	1	0.010269	-0.010571	0.009935	0.07673	94363	1.84	123	1267	0	61	2249	1069	1867	43530	69	5916	1009	254	4948	379225	0	272	1347	847	128	0	140	4	736	260	3407	145	182	26	227	607	0	1500	376	2247	1344	2978	49800	18300	0.139	68100
10.8	220.01	7.67	1	0.010269	-0.010571	0.009935	0.07673	94364	1.82	129	1283	0	63	2246	1190	1911	43198	31	5974	1010	261	4966	378590	0	240	1347	768	117	51	9	56	700	36	3446	0	224	0	117	552	10	1385	590	2375	1459	2836	50940	18570	0.139	69510
10.9	221.01	7.67	1	0.010269	-0.010571	0.009935	0.07673	94546	1.91	143	1335	0	84	2357	1104	1844	43039	0	6046	1027	322	4975	378842	142	228	1255	765	151	0	133	199	835	196	3535	0	123	83	219	653	39	1311	482	2254	1434	2233	50885	18624	0.139	69509
11	222.01	7.68	1	0.010269	-0.010571	0.009935	0.07673	94223	1.8	155	1228	0	83	2268	1129	1843	42768	0	6051	905	190	4832	377167	0	286	1360	769	40	27	0	35	803	247	3585	80	75	27	209	505	147	1535	289	2326	1337	2370	51908	18169	0.14	70077
11.1	223.01	7.67	1	0.010269	-0.010571	0.009935	0.07673	94185	1.83	156	1276	0	87	2282	1100	1955	43230	66	5963	939	259	4834	377032	0	237	1251	838	138	0	0	4	725	420	3497	0	89	105	192	625	101	1370	0	2173	1395	2925	51088	17968	0.139	69056
11.2	224.01	7.68	1	0.010269	-0.010571	0.009935	0.07673	94277	1.79	153	1251	0	86	2247	1180	1961	42836	0	5933	924	185	4884	377826	0	212	1293	644	87	0	21	108	881	227	3411	0	42	84	168	608	93	1527	526	2283	1437	2736	50314	18222	0.14	68536
11.3	225.01	7.67	1	0.010269	-0.010571	0.009935	0.07673	95639	1.83	183	1308	0	71	2316	1089	1920	43999	0	6108	1066	225	4974	384151	0	233	1380	727	172	40	0	75	670	315	3405	56	73	40	157	555	69	1616	471	2391	1423	2956	51099	18542	0.14	69641
11.4	226.01	7.68	1	0.010269	-0.010571	0.009935	0.07673	94833	1.89	151	1213	0	115	2326	1110	1912	44307	56	6010	1008	297	4853	380780	0	268	1270	795	124	0	43	174	789	411	3431	22	134	80	156	645	55	1505	231	2409	1438	2520	50362	18211	0.14	68573
11.5	227.01	7.68	1	0.010269	-0.010571	0.009935	0.07673	94808	1.83	132	1276	0	74	2323	1103	1857	43746	0	6040	905	260	5065	382086	368	220	1377	815	112	0	10	119	699	457	3493	0	0	115	112	554	40	1355	54	2248	1377	1863	51010	18282	0.139	69292
11.6	228.01	7.68	1	0.010269	-0.010571	0.009935	0.07673	93742	1.85	137	1297	0	112	2287	1107	1854	43260	0	6023	984	260	4980	378218	0	177	1328	761	186	0	0	0	739	245	3437	135	0	38	160	639	132	1496	347	2358	1386	2631	49895	18137	0.138	68032
11.7	229.01	7.68	1	0.010269	-0.010571	0.009935	0.07673	87892	1.81	111	1164	0	56	2018	1100	1705	40085	0	5627	909	244	4529	352571	0	244	1105	615	35	48	63	0	749	219	3258	8	149	53	198	510	0	1218	408	1974	1177	3652	48472	17179	0.134	65651
11.8	230.01	7.69	1	0.010269	-0.010571	0.009935	0.07673	93829	2.07	142	1374	0	80	1985	1004	1805	43993	42	5838	1105	293	4898	379911	444	256	1234	839	0	73	58	102	686	400	3532	0	183	48	271	536	71	1426	100	2312	1450	1451	49895	18395	0.138	68290
11.9	231.01	7.69	1	0.010269	-0.010571	0.009935	0.07673	98146	1.77	145	1332	0	102	2447	1106	1945	45057	0	6314	1099	285	5189	396277	0	293	1421	828	173	34	0	51	904	311	3711	4	29	0	140	646	90	1328	477	2182	1565	3263	52235	18848	0.142	71083
12	232.01	7.7	1	0.010269	-0.010571	0.009935	0.07673	90788	1.71	158	1137	0	111	2275	1156	1812	40195	13	5620	858	270	4576	362461	0	166	1130	739	59	0	0	25	731	185	3231	19	154	112	205	537	151	1418	330	2207	1334	2690	50297	18179	0.137	68476
12.1	233.01	7.7	1	0.010269	-0.010571	0.009935	0.07673	94963	1.89	144	1361	0	79	2082	1162	2004	44348	101	6102	1016	271	5003	385020	0	216	1388	782	162	0	0	60	810	288	3385	0	7	82	141	652	188	1339	201	2258	1432	2869	49971	17998	0.139	67969
12.2	234.01	7.7	1	0.010269	-0.010571	0.009935	0.07673	94814	1.92	148	1394	0	80	2095	1103	1893	44733	48	6199	976	256	4970	385378	34	261	1336	765	75	0	27	59	877	152	3346	0	0	48	186	585	147	1474	477	2301	1510	2552	49904	18243	0.139	68147
12.3	235.01	7.7	1	0.010269	-0.010571	0.009935	0.07673	95321	1.98	153	1360	0	115	2134	1107	1912	45328	70	6046	999	319	5052	387804	44	212	1346	721	21	7	36	20	692	86	3267	0	81	106	256	636	0	1455	630	2366	1381	2306	48664	18234	0.139	66898
12.4	236.01	7.7	1	0.010269	-0.010571	0.009935	0.07673	93935	1.9	127	1389	0	57	2040	1130	1827	45352	0	6020	943	284	5012	383196	0	241	1293	748	56	0	0	33	648	353	3352	36	168	89	196	600	0	1627	373	2493	1441	3098	48836	18126	0.137	66962
12.5	237.01	7.7	1	0.010269	-0.010571	0.009935	0.07673	94560	1.99	130	1451	0	91	1981	1060	1970	46901	0	6199	987	299	5073	386230	84	208	1395	789	167	8	0	58	698	313	3484	0	41	26	61	595	228	1247	214	2278	1434	2395	48639	17980	0.138	66619
12.6	238.01	7.7	1	0.010269	-0.010571	0.009935	0.07673	94526	1.93	172	1501	0	54	1912	1083	1932	47025	77	6207	999	328	5083	385822	0	255	1310	767	238	0	29	44	534	241	3362	130	28	92	223	684	0	1447	418	2490	1477	2631	48120	18117	0.138	66237
12.7	239.01	7.7	1	0.010269	-0.010571	0.009935	0.07673	95684	1.82	119	1504	0	64	1978	1154	1970	47683	28	6284	1041	333	5211	392284	0	161	1287	822	110	0	0	0	715	66	3431	85	0	53	150	615	135	1601	407	2295	1420	2465	48476	18190	0.138	66666
12.8	240.01	7.7	1	0.010269	-0.010571	0.009935	0.07673	95414	1.93	134	1544	0	56	1907	1096	1987	47189	11	6235	961	298	5110	391993	0	161	1360	921	180	17	186	63	677	189	3328	191	48	77	126	656	0	1674	382	2528	1380	2846	48507	17939	0.138	66446
12.9	241.01	7.7	1	0.010269	-0.010571	0.009935	0.07673	95835	2.05	219	1614	0	44	2002	1100	1966	48127	23	6168	1068	191	5112	392408	0	207	1383	791	205	0	0	145	794	281	3473	0	51	68	116	668	265	1539	628	2385	1476	2309	49205	18163	0.138	67368
13	242.01	7.71	1	0.010269	-0.010571	0.009935	0.07673	95003	1.93	149	1505	0	64	1908	1088	1839	47835	46	6385	1088	299	5213	389091	159	213	1504	840	73	93	42	49	766	175	3323	29	113	76	324	550	0	1548	295	2339	1514	2369	48614	18452	0.137	67066
13.1	243.01	7.71	1	0.010269	-0.010571	0.009935	0.07673	95588	1.89	133	1453	0	90	1913	1059	1859	47724	26	6301	954	405	5123	393228	0	182	1422	742	132	0	85	70	692	361	3342	0	71	120	196	640	38	1729	266	2626	1393	3143	48288	18217	0.138	66505
13.2	244.01	7.72	1	0.010269	-0.010571	0.009935	0.07673	93880	2.04	186	1554	0	57	1941	1152	1868	46893	0	6155	1019	348	5037	384047	0	281	1382	725	186	30	0	113	731	323	3346	79	67	37	126	616	78	1255	205	1992	1548	3089	48055	18283	0.136	66338
13.3	245.01	7.71	1	0.010269	-0.010571	0.009935	0.07673	93507	1.84	130	1514	0	123	1907	1149	1884	47349	108	6086	1034	275	4938	382491	0	173	1287	723	85	0	14	144	801	387	3207	115	213	35	221	660	116	1411	275	2227	1375	3088	48367	17894	0.136	66261
13.4	246.01	7.72	1	0.010269	-0.010571	0.009935	0.07673	95078	1.94	136	1477	0	86	2182	1135	1811	46785	47	6058	1064	222	5026	388626	0	266	1386	767	9	36	0	18	837	0	3126	146	0	11	236	592	144	1300	1015	2449	1562	3039	48912	18465	0.138	67377
13.5	247.01	7.71	1	0.010269	-0.010571	0.009935	0.07673	93646	1.86	137	1448	0	120	2140	1133	1921	45627	39	5981	1016	222	4949	383509	0	197	1347	736	216	0	27	122	754	205	3227	51	78	102	162	546	0	1468	602	2192	1416	3057	47949	18357	0.136	66306
13.6	248.01	7.72	1	0.010269	-0.010571	0.009935	0.07673	94293	1.9	141	1468	0	76	2192	1067	1800	46512	26	6048	954	246	5037	384890	0	266	1208	767	243	77	36	67	677	221	3171	10	49	64	89	535	94	1340	509	2246	1377	3273	48043	18358	0.138	66401
13.7	249.01	7.72	1	0.010269	-0.010571	0.009935	0.07673	93963	1.92	148	1462	0	76	2158	1055	1943	46624	9	5958	1110	267	5137	383426	0	265	1366	855	221	88	0	107	753	220	3152	0	149	0	151	672	251	1316	301	2557	1395	2540	47876	18063	0.137	65939
13.8	250.01	7.72	1	0.010269	-0.010571	0.009935	0.07673	94145	1.97	185	1478	0	93	2118	1084	1872	48104	15	6043	1022	202	5092	381560	0	202	1258	775	116	0	0	0	736	108	3457	68	0	14	158	597	112	1275	482	2329	1546	2670	48701	18600	0.137	67301
13.9	251.01	7.73	1	0.010269	-0.010571	0.009935	0.07673	92383	1.86	155	1440	0	59	2050	1208	1826	47593	0	5906	896	320	4805	372131	0	238	1185	648	70	0	0	113	847	246	3621	0	0	125	314	667	32	1440	203	2429	1419	2735	49244	18447	0.136	67691
14	252.01	7.73	1	0.010269	-0.010571	0.009935	0.07673	92054	1.83	216	1460	0	90	2182	1130	1859	47974	66	5806	925	336	4956	369617	315	273	1254	719	128	11	0	58	747	225	3598	191	0	48	218	608	97	1316	250	2135	1287	1852	47990	18171	0.137	66161
14.1	253.01	7.73	1	0.010269	-0.010571	0.009935	0.07673	93157	1.75	198	1479	0	99	2131	1123	1828	48705	33	5935	1010	281	4915	375198	181	224	1291	720	79	55	82	0	741	273	3456	0	16	16	222	542	0	1269	254	2198	1365	2031	48942	18617	0.137	67559
14.2	254.01	7.72	1	0.010269	-0.010571	0.009935	0.07673	93281	1.94	155	1513	0	46	2151	1088	1864	48503	0	5987	950	298	4939	376340	0	258	1305	799	136	119	0	25	690	153	3564	0	68	70	220	535	14	1506	457	2427	1405	2155	48905	18484	0.137	67389
14.3	255.01	7.73	1	0.010269	-0.010571	0.009935	0.07673	93491	2	206	1528	0	104	2102	1145	1832	47864	46	5962	1097	255	5048	378995	0	121	1216	693	50	10	0	5	827	122	3401	27	0	43	170	557	102	1599	503	2309	1369	2313	48327	18305	0.137	66632
14.4	256.01	7.73	1	0.010269	-0.010571	0.009935	0.07673	93271	1.82	157	1592	0	82	2061	1076	1804	48721	0	5909	921	307	5033	377716	0	249	1394	775	168	12	109	70	670	86	3313	219	169	43	86	664	0	1551	482	2318	1507	2717	49151	18199	0.137	67350
14.5	257.01	7.73	1	0.010269	-0.010571	0.009935	0.07673	92259	1.93	207	1571	0	72	2060	1123	1791	47805	7	6043	919	219	4936	374701	0	190	1251	768	120	9	0	113	783	151	3233	0	44	15	162	605	149	1502	444	2386	1355	2145	47890	18020	0.136	65910
14.6	258.01	7.73	1	0.010269	-0.010571	0.009935	0.07673	92786	1.88	121	1512	0	98	2043	1112	1815	48582	0	5901	993	296	4912	377339	0	194	1287	696	74	0	0	53	723	127	3254	0	217	120	199	576	12	1465	316	2329	1454	2548	48096	17945	0.136	66041
14.7	259.01	7.73	1	0.010269	-0.010571	0.009935	0.07673	93701	1.95	197	1544	0	56	2090	1031	1843	49342	0	6011	1117	316	5046	381244	0	204	1272	727	246	0	96	4	670	147	3239	51	0	30	180	536	0	1467	503	2320	1402	3100	48421	18325	0.136	66746
14.8	260.01	7.74	1	0.010269	-0.010571	0.009935	0.07673	93216	1.95	159	1536	0	70	2074	1125	1889	48152	58	6095	819	293	4859	381336	0	241	1234	765	128	21	128	0	730	152	3299	19	179	55	106	583	0	1424	473	2246	1352	2720	47703	18174	0.136	65877
14.9	261.01	7.74	1	0.010269	-0.010571	0.009935	0.07673	93724	1.96	154	1567	0	96	2039	1165	1923	48328	0	6229	984	278	5063	381288	0	196	1203	771	162	49	0	178	765	119	3211	100	0	85	98	541	16	1598	585	2352	1379	2672	48310	18085	0.137	66395
15	262.01	7.74	1	0.010269	-0.010571	0.009935	0.07673	91930	1.8	161	1471	0	42	2071	1128	1734	46951	0	5861	963	232	4928	375005	0	228	1387	783	127	89	0	0	604	132	3194	60	166	17	135	532	12	1452	467	2272	1316	2306	46951	17850	0.136	64801
15.1	263.01	7.73	1	0.010269	-0.010571	0.009935	0.07673	95814	2.01	150	1614	0	100	2082	1063	1956	49678	73	6062	1045	276	5030	395655	0	280	1356	821	190	7	0	127	690	187	3295	46	121	71	180	579	27	1446	452	2513	1325	2342	47539	18315	0.137	65854
15.2	264.01	7.74	1	0.010269	-0.010571	0.009935	0.07673	94341	1.98	145	1637	0	84	2065	1148	1929	49553	0	6186	954	316	5020	387260	0	279	1365	733	157	0	11	9	591	138	3327	27	0	123	164	682	24	1329	614	2254	1356	2567	47687	18135	0.137	65822
15.3	265.01	7.74	1	0.010269	-0.010571	0.009935	0.07673	93749	2.01	160	1600	0	71	2106	1102	1806	48661	25	5874	1026	231	5009	384877	0	230	1316	791	126	38	0	50	808	263	3269	57	0	77	108	506	0	1510	339	2360	1356	3009	48277	18002	0.136	66279
15.4	266.01	7.74	1	0.010269	-0.010571	0.009935	0.07673	92557	1.91	182	1506	0	102	2144	1083	1816	49013	0	5985	972	306	4975	376592	12	218	1195	721	226	38	17	54	735	61	3209	107	0	78	163	554	12	1337	464	2238	1346	2470	47607	18419	0.136	66026
15.5	267.01	7.74	1	0.010269	-0.010571	0.009935	0.07673	91496	1.75	137	1614	0	69	2061	1150	1781	48103	28	5921	929	301	4705	372649	0	197	1174	751	146	43	48	138	711	35	3443	0	107	114	211	536	93	1476	479	2203	1376	2759	46514	17762	0.135	64276
15.6	268.01	7.75	1	0.010269	-0.010571	0.009935	0.07673	93120	1.95	203	1593	0	71	2094	1077	1839	49578	33	6064	1004	318	5008	379738	125	243	1311	696	72	51	0	92	744	253	3525	0	115	43	208	552	230	1180	391	2217	1534	2272	47326	18000	0.136	65326
15.7	269.01	7.75	1	0.010269	-0.010571	0.009935	0.07673	93620	1.87	182	1644	0	57	2186	1068	1949	49435	93	6254	1079	284	5094	383074	0	188	1243	791	141	0	67	157	679	324	3631	0	113	0	181	636	115	1318	167	2276	1332	2707	47478	17843	0.136	65321
15.8	270.01	7.75	1	0.010269	-0.010571	0.009935	0.07673	93574	1.92	177	1503	0	96	2090	1021	1909	49086	41	6063	1046	319	4958	383172	150	168	1398	844	243	19	18	76	715	229	3474	0	0	31	79	542	0	1600	356	2385	1359	2172	47351	18259	0.136	65610
15.9	271.01	7.75	1	0.010269	-0.010571	0.009935	0.07673	93034	1.91	129	1538	0	115	2080	1044	1960	48190	119	6006	1076	222	4968	380117	0	154	1258	724	203	0	73	35	745	0	3472	34	56	38	155	510	0	1730	395	2286	1332	2918	46548	18268	0.137	64816
16	272.01	7.75	1	0.010269	-0.010571	0.009935	0.07673	94484	2	165	1691	0	85	2153	1034	1936	50287	0	6180	1022	355	5016	385767	0	244	1282	866	99	119	0	70	767	247	3813	0	10	60	221	578	118	1431	324	2537	1340	2706	47578	18303	0.137	65881
16.1	273.01	7.75	1	0.010269	-0.010571	0.009935	0.07673	95335	1.97	166	1597	0	96	2124	1100	1908	51561	0	6132	1064	199	5163	390282	0	283	1407	806	165	11	41	76	700	234	3751	159	78	34	235	725	118	1491	484	2258	1460	3162	47307	18294	0.137	65601
16.2	274.01	7.75	1	0.010269	-0.010571	0.009935	0.07673	97359	1.97	126	1609	0	74	2234	987	2123	53245	62	6389	994	313	5347	399443	74	249	1458	849	25	39	56	81	773	242	3843	36	32	96	244	673	0	1535	467	2391	1497	2570	47652	18631	0.138	66283
16.3	275.01	7.75	1	0.010269	-0.010571	0.009935	0.07673	96261	1.95	214	1662	0	116	2219	1024	2026	53057	0	6272	1061	280	5236	392795	70	220	1376	877	166	0	0	0	715	102	3802	0	0	13	243	669	195	1279	530	2343	1464	2366	47576	18463	0.138	66039
16.4	276.01	7.76	1	0.010269	-0.010571	0.009935	0.07673	93556	1.76	209	1511	0	115	2311	1082	1951	50521	0	6063	926	303	4920	377633	0	266	1353	780	162	0	226	104	743	0	3933	68	0	52	294	627	0	1533	776	2391	1370	2429	48395	18298	0.137	66693
16.5	277.01	7.76	1	0.010269	-0.010571	0.009935	0.07673	93255	1.9	184	1591	0	92	2362	1059	1914	49856	60	5892	923	263	4923	375202	51	259	1412	853	156	44	45	0	641	162	3736	0	97	94	130	556	22	1189	355	2023	1341	2380	48594	18573	0.137	67167
16.6	278.01	7.76	1	0.010269	-0.010571	0.009935	0.07673	91701	1.87	158	1564	0	98	2276	1099	1771	48049	0	5858	928	300	4772	367207	0	181	1245	740	162	78	76	168	800	248	3632	67	0	12	245	540	31	1357	327	2448	1173	2581	48392	18227	0.136	66619
16.7	279.01	7.77	1	0.010269	-0.010571	0.009935	0.07673	93082	1.84	189	1430	0	77	2284	1108	1916	48551	88	5766	967	302	4785	373634	0	288	1372	764	186	78	0	69	789	268	3360	0	307	72	111	660	123	1201	222	2138	1377	2947	48756	18059	0.138	66815
16.8	280.01	7.76	1	0.010269	-0.010571	0.009935	0.07673	95196	1.84	151	1510	0	89	2472	1096	1839	50291	32	5834	1024	323	5019	384188	0	204	1214	698	84	50	64	94	843	191	3699	47	0	86	239	632	24	1566	496	2308	1389	2911	48748	18294	0.138	67042
16.9	281.01	7.77	1	0.010269	-0.010571	0.009935	0.07673	94139	1.84	227	1530	0	99	2392	1060	1871	48743	46	5881	957	237	5040	380308	0	221	1304	829	20	0	0	84	718	219	3547	0	54	140	211	646	123	1178	423	2243	1237	2611	48875	18462	0.138	67337
17	282.01	7.77	1	0.010269	-0.010571	0.009935	0.07673	94050	1.89	148	1491	0	78	2297	1078	1888	49023	28	5973	961	212	5039	380418	0	237	1263	708	140	0	99	33	698	280	3481	55	11	29	191	653	0	1483	330	2235	1492	2731	49272	18168	0.137	67440
17.1	283.01	7.76	1	0.010269	-0.010571	0.009935	0.07673	96722	1.98	151	1539	0	105	2437	1067	1980	48370	87	6311	1042	289	5062	395703	0	229	1317	755	110	0	14	139	870	85	3477	143	30	0	276	658	70	1672	546	2390	1574	2740	48781	18255	0.139	67036
17.2	284.01	7.76	1	0.010269	-0.010571	0.009935	0.07673	96276	1.9	183	1568	0	114	2491	1019	1937	48982	0	6200	1023	265	5085	395471	0	274	1402	816	126	0	130	104	747	251	3502	0	81	0	216	662	0	1802	469	2448	1527	2749	48205	18073	0.138	66278
17.3	285.01	7.77	1	0.010269	-0.010571	0.009935	0.07673	97103	1.92	180	1488	0	120	2544	1120	1954	48546	0	6278	1035	252	5163	399470	0	162	1409	751	65	0	26	71	798	153	3529	0	127	16	173	606	38	1627	533	2250	1336	2976	48685	18539	0.138	67224
17.4	286.01	7.77	1	0.010269	-0.010571	0.009935	0.07673	97439	1.96	121	1613	0	118	2427	1063	1872	49534	0	6346	1138	238	5234	403193	0	206	1423	764	142	0	0	99	750	272	3398	0	120	58	152	585	131	1451	294	2405	1454	3378	47466	17993	0.138	65459
17.5	287.01	7.78	1	0.010269	-0.010571	0.009935	0.07673	94844	1.78	185	1565	0	85	2270	1084	1817	47971	26	6198	1001	298	5078	389410	0	176	1301	768	158	0	0	85	664	32	3394	69	174	73	202	649	127	1317	581	2313	1553	2623	47559	18007	0.137	65566
17.6	288.01	7.78	1	0.010269	-0.010571	0.009935	0.07673	96404	1.92	165	1637	0	108	2386	1012	1825	50174	109	6194	1076	238	5039	395253	0	236	1329	758	53	0	0	32	667	245	3792	100	0	55	191	613	107	1560	305	2421	1364	2527	48231	18464	0.139	66695
17.7	289.01	7.79	1	0.010269	-0.010571	0.009935	0.07673	95792	1.98	181	1643	0	99	2316	1116	1961	50833	95	6160	1061	254	5165	394187	0	179	1323	896	145	118	93	167	734	111	3694	78	50	10	124	626	14	1496	600	2453	1488	2807	47982	18425	0.137	66407
17.8	290.01	7.78	1	0.010269	-0.010571	0.009935	0.07673	97317	1.92	196	1680	0	54	2115	1082	1928	51079	0	6500	1079	267	5319	404077	0	245	1332	873	113	29	140	91	684	210	3365	37	116	16	170	610	0	1480	566	2323	1483	2910	47139	18322	0.138	65461
17.9	291.01	7.79	1	0.010269	-0.010571	0.009935	0.07673	96525	1.94	221	1714	0	101	2247	1033	1984	49905	11	6280	1080	221	5196	401831	0	217	1387	967	260	0	0	10	666	11	3383	139	66	100	115	699	0	1463	620	2296	1588	3300	47073	18147	0.137	65220
18	292.01	7.78	1	0.010269	-0.010571	0.009935	0.07673	97198	1.98	209	1775	0	77	2221	993	2015	51593	50	6420	1022	217	5360	405001	0	230	1386	861	241	0	70	112	598	77	3300	54	0	25	122	674	0	1532	518	2561	1516	3019	46944	18122	0.138	65066
18.1	293.01	7.78	1	0.010269	-0.010571	0.009935	0.07673	99492	2.07	229	1839	0	115	2283	1073	2042	53422	46	6837	1081	362	5342	413847	0	278	1460	878	153	0	136	165	764	275	3446	54	119	106	139	583	18	1602	263	2676	1436	2756	47399	18369	0.139	65768
18.2	294.01	7.83	1	0.010269	-0.010571	0.009935	0.07673	90512	1.87	193	1596	0	69	2052	1185	1790	47973	106	5796	906	255	4771	369697	0	175	1299	758	121	0	0	51	711	212	3339	16	42	95	174	590	32	1520	454	2282	1431	2955	46293	17642	0.135	63935
18.3	295.01	7.96	1	0.010269	-0.010571	0.009935	0.07673	65580	1.48	143	875	0	62	1302	1452	1113	30169	0	3706	543	131	3160	244867	240	212	938	564	72	0	0	0	523	189	2809	117	77	57	92	423	110	716	263	1081	903	2201	42592	16004	0.126	58596
18.4	296.01	8.01	1	0.010269	-0.010571	0.009935	0.07673	59968	1.52	78	716	0	46	1386	1516	932	25724	0	3200	507	81	2748	214276	314	223	964	490	42	0	0	63	752	53	3045	248	225	17	65	380	165	531	438	984	881	1799	42447	15768	0.126	58215
18.5	297.01	7.97	1	0.010269	-0.010571	0.009935	0.07673	53608	1.45	83	743	0	67	1470	1579	931	25336	0	3181	416	94	2640	203368	230	226	911	462	102	0	0	13	570	93	2756	70	87	60	24	340	32	554	426	987	693	1652	35965	12552	0.117	48517
18.6	298.01	7.93	1	0.010269	-0.010571	0.009935	0.07673	28116	1.39	69	344	0	18	558	1614	415	11461	0	1406	227	69	1327	90364	116	118	406	165	0	0	0	0	368	9	1660	149	0	29	14	127	184	181	155	467	296	684	25247	8098	0.107	33345
18.7	299.01	7.95	1	0.010269	-0.010571	0.009935	0.07673	13614	2.77	39	68	0	0	98	1703	80	2442	0	319	57	35	296	22133	171	125	130	33	0	0	0	0	113	0	996	171	0	7	15	47	180	39	221	0	115	265	18658	6072	0.127	24730
18.8	300.01	7.95	1	0.010269	-0.010571	0.009935	0.07673	9770	10.95	28	0	0	0	0	1745	0	108	0	10	25	13	32	1235	32	117	23	0	0	0	0	0	94	61	798	184	16	0	0	11	143	96	149	0	0	180	17923	5857	0.151	23780

## Sheet: SE-45
Depth	position (mm)	sample surface	validity	E-gain	E-offset	F-slope	F-offset	cps	MSE	Al	Si	P	S	Cl	Ar	K	Ca	Sc	Ti	V	Cr	Mn	Fe	Co	Ni	Cu	Zn	Ga	Ge	As	Se	Br	Rb	Sr	Y	Zr	Ba	Ta	W	Pb	Fe a*2	Fe a+b	S1	S2	S3	Mo inc	Mo coh	Dt	Inc+coh
0	69.21	8.19	1	0.010269	-0.010571	0.009935	0.07673	111301	1.99	122	756	0	206	4669	1013	1905	53261	77	4888	863	287	4209	312603	628	460	1491	532	71	93	130	197	2631	0	7540	0	79	0	341	713	182	1003	729	2029	1322	676	89314	21715	0.173	111029
0.1	70.21	8.13	1	0.010269	-0.010571	0.009935	0.07673	107241	1.88	96	1014	0	119	2966	941	2106	60070	0	6052	939	334	4985	381406	281	328	1366	819	19	0	0	56	1336	151	6718	0	333	0	304	742	214	1342	564	2473	1450	1554	66658	19961	0.156	86619
0.2	71.21	8.1	1	0.010269	-0.010571	0.009935	0.07673	103434	1.96	116	922	0	126	2463	818	1979	55909	128	5900	902	292	4656	379236	0	371	1518	790	93	0	92	66	1128	256	5662	0	25	38	276	593	139	1376	370	2467	1436	3070	61520	19769	0.151	81289
0.3	72.21	8.1	1	0.010269	-0.010571	0.009935	0.07673	102060	1.86	147	1001	0	74	2140	824	1886	55011	0	6070	932	317	4630	386185	0	228	1418	756	129	20	20	220	1055	255	5489	0	0	0	168	622	125	1295	179	2389	1455	2772	57989	19255	0.148	77244
0.4	73.21	8.12	1	0.010269	-0.010571	0.009935	0.07673	97141	1.85	100	869	0	118	2206	926	1848	65320	17	5392	923	286	4395	357999	31	231	1219	746	91	19	116	13	959	140	6756	0	154	0	149	644	0	1110	331	2019	1382	2880	55437	18872	0.145	74309
0.5	74.21	8.12	1	0.010269	-0.010571	0.009935	0.07673	93257	1.73	118	859	0	58	2255	863	1763	88627	0	4759	794	235	4052	318666	0	242	1059	718	0	0	77	252	1035	245	10614	77	164	17	259	581	5	966	249	1900	1292	2416	55261	19213	0.143	74474
0.6	75.21	8.11	1	0.010269	-0.010571	0.009935	0.07673	88955	1.75	59	686	0	79	2337	859	1554	111792	40	4284	693	181	3439	276674	0	283	950	601	36	127	0	0	903	268	17012	0	55	0	173	587	98	810	43	1674	1022	2625	53617	18745	0.14	72362
0.7	76.21	8.13	1	0.010269	-0.010571	0.009935	0.07673	84694	1.7	69	587	0	74	2490	897	1453	111048	89	3874	595	251	3319	252941	290	306	966	538	172	0	0	181	1085	222	20259	0	0	0	84	593	202	615	0	1542	1074	1476	51533	18383	0.139	69916
0.8	77.21	8.14	1	0.010269	-0.010571	0.009935	0.07673	86323	1.77	54	660	0	119	2661	878	1403	123610	161	3777	584	168	3275	252692	475	251	872	629	0	0	46	0	962	154	21716	0	0	0	257	609	80	561	61	1392	939	833	51379	19056	0.14	70435
0.9	78.21	8.15	1	0.010269	-0.010571	0.009935	0.07673	88892	1.9	102	675	0	64	2724	880	1482	131029	0	3878	672	202	3433	261737	222	292	849	560	91	84	31	59	985	199	21873	0	0	26	221	630	80	611	84	1765	985	1374	50764	18384	0.14	69148
1	79.21	8.17	1	0.010269	-0.010571	0.009935	0.07673	87771	1.83	58	524	0	69	3109	938	1349	130414	89	3564	664	161	3284	246967	203	328	950	548	129	22	0	213	1128	67	22424	111	0	0	160	635	122	563	135	1412	1064	1663	53663	19233	0.142	72896
1.1	80.21	8.18	1	0.010269	-0.010571	0.009935	0.07673	89284	1.78	97	571	0	93	3061	881	1385	131593	125	3854	572	215	3352	247954	242	331	954	614	4	5	0	197	1195	121	22865	22	34	0	237	644	201	647	497	1519	1027	1228	55497	19277	0.144	74774
1.2	81.21	8.19	1	0.010269	-0.010571	0.009935	0.07673	88419	1.76	75	488	0	86	2955	913	1375	130854	55	3715	522	228	3327	246798	121	277	929	496	65	48	34	48	1267	59	22569	74	0	0	238	580	126	761	349	1348	1029	1731	54559	19144	0.142	73703
1.3	82.21	8.2	1	0.010269	-0.010571	0.009935	0.07673	89265	1.83	68	472	0	72	3046	985	1330	130538	27	3813	588	170	3362	250982	174	296	882	590	0	0	0	155	1168	0	22655	14	56	0	153	678	87	511	770	1696	974	1384	53731	19474	0.143	73205
1.4	83.21	8.21	1	0.010269	-0.010571	0.009935	0.07673	88724	1.88	84	536	0	125	3006	1008	1310	128229	157	3682	576	283	3262	252288	165	242	936	522	126	28	0	155	1302	110	22167	56	0	0	191	663	115	487	470	1439	915	1786	53987	19218	0.142	73205
1.5	84.21	8.21	1	0.010269	-0.010571	0.009935	0.07673	87514	1.84	75	517	0	100	2975	977	1330	125201	65	3756	546	209	3314	248115	93	322	1017	495	31	76	125	14	1234	95	21301	77	21	0	119	609	50	570	146	1633	968	1669	54133	19120	0.142	73253
1.6	85.21	8.22	1	0.010269	-0.010571	0.009935	0.07673	87443	1.8	67	458	0	99	2984	1019	1311	121694	0	3757	606	193	3307	251463	158	282	959	678	28	0	37	208	1126	221	20324	12	149	0	193	664	17	765	18	1339	928	1728	52886	19401	0.141	72287
1.7	86.21	8.22	1	0.010269	-0.010571	0.009935	0.07673	86216	1.71	95	503	0	70	2945	941	1334	119018	0	3818	511	232	3222	250139	20	370	942	584	48	22	0	165	1243	241	19700	39	122	0	149	657	109	771	56	1376	1025	1960	52789	19080	0.14	71869
1.8	87.21	8.23	1	0.010269	-0.010571	0.009935	0.07673	86369	1.73	75	510	0	68	3094	1086	1226	119343	158	3687	639	152	3202	248732	0	320	969	605	4	11	94	16	1004	204	20379	0	0	0	304	652	0	643	0	1654	943	1877	51879	18971	0.14	70850
1.9	88.21	8.24	1	0.010269	-0.010571	0.009935	0.07673	87920	1.78	80	495	0	169	3237	972	1268	122267	81	3714	688	183	3137	246063	132	308	798	606	28	38	40	70	1266	292	22233	20	114	0	168	657	89	593	75	1384	949	1709	54811	19675	0.143	74486
2	89.21	8.25	1	0.010269	-0.010571	0.009935	0.07673	86079	1.76	78	434	0	69	3407	979	1166	129389	193	3381	556	164	3032	230756	0	320	901	496	0	0	0	92	1111	60	23295	0	0	0	81	716	0	539	250	1658	853	1598	54350	19225	0.142	73575
2.1	90.21	8.26	1	0.010269	-0.010571	0.009935	0.07673	87184	1.73	85	467	0	104	3458	1016	1213	142747	118	3261	458	249	2907	221846	711	286	825	533	105	52	0	36	1153	0	26015	0	102	0	149	753	142	277	103	1077	1015	646	55777	19777	0.144	75554
2.2	91.21	8.26	1	0.010269	-0.010571	0.009935	0.07673	89848	1.84	95	427	0	75	3322	1070	1238	162438	208	3205	428	241	3010	218142	289	381	865	558	68	0	0	23	1347	111	28350	0	0	11	194	586	193	605	258	1269	799	903	56613	19866	0.146	76479
2.3	92.21	8.27	1	0.010269	-0.010571	0.009935	0.07673	82427	1.78	110	349	0	82	3424	1053	1019	163845	125	2654	497	177	2505	189164	286	300	729	476	0	0	0	154	1231	99	26544	131	50	0	202	737	156	710	128	1110	824	1098	53095	18906	0.14	72001
2.4	93.21	8.27	1	0.010269	-0.010571	0.009935	0.07673	78486	1.77	73	318	0	98	3664	1013	779	186492	257	2128	391	147	2030	147172	218	343	629	426	79	0	33	0	1024	155	31398	16	0	0	140	708	48	332	116	891	672	770	51123	18393	0.14	69516
2.5	94.21	8.26	1	0.010269	-0.010571	0.009935	0.07673	74833	1.82	72	222	0	112	3703	1029	662	196089	210	1582	209	141	1756	108913	179	318	319	257	0	0	5	24	1100	0	40684	51	36	0	186	594	64	291	236	566	493	641	52392	18484	0.141	70876
2.6	95.21	8.27	1	0.010269	-0.010571	0.009935	0.07673	77620	2.03	59	188	0	115	3824	1055	604	251317	262	938	127	154	1396	69960	742	487	372	266	0	0	0	101	1350	53	49251	0	62	0	128	691	225	123	0	322	455	0	56000	19655	0.145	75655
2.7	96.21	8.29	1	0.010269	-0.010571	0.009935	0.07673	80262	2.24	94	153	0	167	3713	1215	563	282179	164	919	85	165	1725	70946	396	497	251	171	0	0	44	115	1260	0	49656	42	0	0	140	546	102	193	86	385	398	221	55232	19317	0.144	74549
2.8	97.21	8.31	1	0.010269	-0.010571	0.009935	0.07673	78219	2.09	60	144	0	165	3775	1161	516	281452	171	573	28	151	1845	51742	265	451	285	225	0	0	0	238	1382	0	50927	0	0	0	164	550	11	18	273	285	390	244	55534	19793	0.145	75327
2.9	98.21	8.32	1	0.010269	-0.010571	0.009935	0.07673	79130	2.13	31	149	0	200	4153	1120	550	273563	193	752	48	77	1819	49598	389	468	291	195	0	0	10	17	1471	0	52938	93	0	0	106	699	126	132	400	322	331	0	57956	20322	0.147	78278
3	99.21	8.34	1	0.010269	-0.010571	0.009935	0.07673	78450	2.06	77	125	0	110	3898	1222	534	259990	223	799	104	124	1507	55314	629	406	318	180	0	0	0	211	1530	0	52486	60	57	0	115	637	49	204	243	277	346	0	57473	19815	0.147	77288
3.1	100.21	8.34	1	0.010269	-0.010571	0.009935	0.07673	80828	2.12	20	136	0	159	3670	1217	541	285584	145	906	96	120	1555	59042	516	461	381	193	0	0	0	34	1798	0	52643	155	18	0	87	685	80	117	483	348	429	0	56971	19930	0.147	76901
3.2	101.21	8.35	1	0.010269	-0.010571	0.009935	0.07673	80305	2.13	47	153	0	149	3666	1180	542	275877	371	930	107	88	1637	67387	630	481	372	285	0	0	0	107	1426	0	51202	142	48	0	145	641	287	53	146	292	450	0	56242	19527	0.146	75769
3.3	102.21	8.36	1	0.010269	-0.010571	0.009935	0.07673	79973	2.31	45	100	0	122	3614	1263	482	294710	357	706	14	148	1429	51309	536	546	271	192	0	0	0	30	1554	0	52603	131	158	0	153	658	200	122	519	161	331	0	56603	19806	0.146	76409
3.4	103.21	8.36	1	0.010269	-0.010571	0.009935	0.07673	80776	2.12	62	132	0	165	3825	1279	491	306525	318	700	8	97	1476	47327	589	477	243	202	0	0	0	58	1511	0	53863	92	0	0	111	650	65	204	346	140	341	0	55907	19937	0.146	75844
3.5	104.21	8.36	1	0.010269	-0.010571	0.009935	0.07673	79868	2.42	62	142	0	90	3788	1211	439	303073	375	680	44	112	1386	44490	424	589	277	134	0	0	0	0	1459	16	54651	60	0	0	82	669	261	205	6	291	246	0	57065	20012	0.146	77077
3.6	105.21	8.37	1	0.010269	-0.010571	0.009935	0.07673	81062	2.23	51	124	0	158	3871	1266	486	311719	257	651	37	103	1503	43310	592	514	287	142	0	0	0	103	1437	0	55202	51	0	0	103	725	88	109	227	172	324	0	56497	19629	0.148	76126
3.7	106.21	8.38	1	0.010269	-0.010571	0.009935	0.07673	81317	2.31	19	127	0	145	3747	1267	498	312651	390	619	50	100	1384	44447	378	542	249	138	0	0	35	171	1411	0	54803	281	0	0	136	609	38	76	320	237	324	0	56336	19917	0.147	76253
3.8	107.21	8.38	1	0.010269	-0.010571	0.009935	0.07673	81001	2.19	105	101	0	184	3761	1253	480	310812	309	653	42	136	1499	45496	522	557	369	208	0	0	0	209	1443	0	54260	55	0	0	63	702	144	122	423	221	356	0	56913	20143	0.146	77056
3.9	108.21	8.38	1	0.010269	-0.010571	0.009935	0.07673	80894	2.18	62	178	0	171	4070	1269	487	295955	296	609	58	105	1599	48376	480	508	218	222	0	0	59	20	1320	53	55483	91	0	0	164	663	121	137	176	339	322	0	56550	20152	0.148	76702
4	109.21	8.38	1	0.010269	-0.010571	0.009935	0.07673	81634	2.39	22	114	0	182	3905	1252	453	311923	353	627	45	125	1496	43756	754	541	252	213	0	0	100	0	1322	0	55323	0	132	0	106	682	171	0	373	232	413	0	56868	20250	0.147	77118
4.1	110.21	8.39	1	0.010269	-0.010571	0.009935	0.07673	81708	2.2	29	141	0	122	3917	1250	514	302465	407	648	68	166	1665	52825	537	548	296	166	0	0	0	85	1390	0	53860	102	0	0	117	693	245	148	459	171	363	0	56445	20045	0.147	76490
4.2	111.21	8.39	1	0.010269	-0.010571	0.009935	0.07673	81502	2.21	37	155	0	141	3870	1156	424	306327	114	664	0	84	1528	49333	347	466	210	247	0	0	86	0	1362	0	54478	0	0	0	125	635	87	294	77	302	331	0	56637	20167	0.147	76804
4.3	112.21	8.39	1	0.010269	-0.010571	0.009935	0.07673	82400	2.36	75	137	0	156	3819	1260	460	311969	307	736	25	106	1544	51269	796	493	317	237	0	0	23	119	1439	0	54931	108	0	0	153	641	244	73	347	114	387	0	56826	19987	0.147	76813
4.4	113.21	8.39	1	0.010269	-0.010571	0.009935	0.07673	82708	2.28	54	203	0	204	3693	1278	423	310903	169	795	60	90	1624	52859	237	521	244	202	0	0	40	87	1275	0	55102	29	0	0	137	687	106	79	124	462	347	0	57267	19996	0.147	77263
4.5	114.21	8.4	1	0.010269	-0.010571	0.009935	0.07673	83410	2.33	58	142	0	140	3691	1197	489	309411	202	813	61	109	1713	60186	200	429	281	198	0	0	0	0	1329	0	54091	38	0	0	115	665	184	0	391	359	390	197	56323	20010	0.148	76333
4.6	115.21	8.4	1	0.010269	-0.010571	0.009935	0.07673	83084	2.28	63	161	0	158	3631	1233	529	314376	333	761	35	134	1782	55256	732	520	303	120	0	0	0	90	1387	0	53780	103	151	0	55	747	107	117	169	293	331	0	55861	19954	0.148	75815
4.7	116.21	8.4	1	0.010269	-0.010571	0.009935	0.07673	84068	2.4	94	122	0	195	3647	1227	531	328150	468	737	101	96	1713	51713	531	539	271	198	0	0	0	166	1398	0	55871	183	0	0	112	733	149	273	140	305	311	0	56721	19825	0.147	76546
4.8	117.21	8.4	1	0.010269	-0.010571	0.009935	0.07673	84024	2.34	69	167	0	153	3461	1256	460	331373	134	724	14	161	1753	49065	550	543	256	376	0	0	13	40	1291	0	56137	159	0	0	96	703	149	242	261	285	315	0	56618	20194	0.147	76812
4.9	118.21	8.39	1	0.010269	-0.010571	0.009935	0.07673	85106	2.41	88	125	0	128	3716	1207	515	337365	164	578	24	137	1627	47393	770	608	284	185	0	0	0	59	1444	15	58009	134	0	0	121	711	161	10	211	153	355	0	57014	20264	0.148	77278
5	119.21	8.39	1	0.010269	-0.010571	0.009935	0.07673	83970	2.41	53	153	0	144	3754	1254	460	333792	352	566	60	124	1563	44181	1009	601	203	186	0	0	0	119	1405	0	57143	135	0	0	166	733	309	0	237	100	369	0	56575	20312	0.148	76887
5.1	120.21	8.39	1	0.010269	-0.010571	0.009935	0.07673	83078	2.32	78	137	0	172	3636	1236	392	336612	356	574	20	109	1461	36004	550	554	243	146	0	0	0	244	1330	0	57833	174	0	0	124	700	148	6	174	241	271	0	56854	20458	0.148	77312
5.2	121.21	8.4	1	0.010269	-0.010571	0.009935	0.07673	82151	2.36	73	108	0	157	3532	1294	343	331689	396	487	66	72	1487	37382	469	479	211	199	0	0	94	0	1396	0	56420	184	188	0	72	550	0	169	0	209	272	0	56207	20141	0.147	76348
5.3	122.21	8.4	1	0.010269	-0.010571	0.009935	0.07673	82207	2.36	88	107	0	158	3678	1266	469	329427	330	533	39	148	1450	37531	499	539	207	288	0	13	44	115	1444	0	57235	157	0	0	177	655	98	118	229	311	303	0	56025	19877	0.147	75902
5.4	123.21	8.4	1	0.010269	-0.010571	0.009935	0.07673	79854	2.21	68	121	0	119	3960	1188	480	310676	369	422	0	132	1272	35664	351	537	224	127	0	16	30	23	1190	0	56260	80	91	0	63	647	129	83	225	209	364	0	55610	19768	0.146	75378
5.5	124.21	8.4	1	0.010269	-0.010571	0.009935	0.07673	80030	2.13	49	113	0	108	4083	1215	388	309848	318	385	28	120	1174	32939	387	496	182	202	0	0	0	9	1291	0	57389	223	234	0	8	683	140	98	294	126	283	0	56453	20296	0.147	76749
5.6	125.21	8.4	1	0.010269	-0.010571	0.009935	0.07673	79022	2.26	13	122	0	158	4379	1199	451	285980	402	400	0	94	1054	34453	78	442	206	140	0	0	0	148	1436	131	57178	23	0	0	93	632	286	0	193	363	340	184	57703	20225	0.149	77928
5.7	126.21	8.4	1	0.010269	-0.010571	0.009935	0.07673	78012	2.18	38	105	0	127	4432	1163	448	275999	422	413	57	138	983	32444	227	471	234	174	0	27	0	111	1467	0	56402	55	18	0	98	631	133	0	202	346	268	0	58607	20138	0.149	78745
5.8	127.21	8.41	1	0.010269	-0.010571	0.009935	0.07673	78907	2.22	64	68	0	163	4611	1177	427	275564	337	450	16	192	1044	37334	488	489	247	217	0	9	0	18	1402	0	56793	24	33	0	97	589	151	0	205	104	284	0	58628	20483	0.15	79111
5.9	128.21	8.41	1	0.010269	-0.010571	0.009935	0.07673	76245	2.16	86	88	0	167	4681	1175	429	250341	289	334	0	114	970	32351	295	449	202	200	0	0	0	104	1595	17	56640	119	55	0	135	662	216	0	142	180	178	44	59633	20206	0.15	79839
6	129.21	8.41	1	0.010269	-0.010571	0.009935	0.07673	77540	2.13	46	86	0	127	4639	1154	477	261918	402	373	0	152	919	35576	480	396	143	85	0	10	0	21	1448	0	56460	189	0	0	206	595	113	0	203	143	209	0	58764	20642	0.151	79406
6.1	130.21	8.41	1	0.010269	-0.010571	0.009935	0.07673	77940	2.16	45	64	0	179	4609	1194	415	268671	298	421	12	133	953	32510	156	548	201	117	0	0	0	130	1501	0	56427	65	33	0	97	710	328	109	337	158	283	207	59570	20361	0.151	79931
6.2	131.21	8.41	1	0.010269	-0.010571	0.009935	0.07673	78511	2.15	0	106	0	114	4243	1178	414	278968	420	406	32	90	964	34714	426	464	309	172	0	0	81	31	1602	0	55607	19	159	0	97	729	87	0	443	164	337	0	58478	20114	0.149	78592
6.3	132.21	8.41	1	0.010269	-0.010571	0.009935	0.07673	77182	2.07	51	90	0	100	4144	1092	420	268194	203	405	0	52	938	37828	634	507	353	155	0	0	0	102	1398	24	54642	83	0	0	58	611	135	160	131	128	323	0	57843	20152	0.149	77995
6.4	133.21	8.42	1	0.010269	-0.010571	0.009935	0.07673	77721	2.17	7	88	0	152	4400	1132	442	272899	416	323	5	123	844	33902	321	413	99	92	0	12	0	168	1463	0	55216	207	70	0	183	586	202	36	545	200	247	0	59140	20201	0.149	79341
6.5	134.21	8.42	1	0.010269	-0.010571	0.009935	0.07673	77026	2.2	84	74	0	177	4636	1124	499	264953	507	350	25	153	758	33758	479	463	208	224	0	0	31	34	1629	0	55463	122	0	0	171	691	170	155	310	263	240	0	58474	20240	0.15	78714
6.6	135.21	8.43	1	0.010269	-0.010571	0.009935	0.07673	78793	2.15	74	76	0	152	4558	1199	474	274359	302	410	0	147	817	36565	682	538	106	100	0	0	0	96	1541	0	57259	100	0	0	307	679	211	171	235	192	323	0	60258	20567	0.15	80825
6.7	136.21	8.43	1	0.010269	-0.010571	0.009935	0.07673	79156	2.26	49	156	0	172	4020	1181	473	282677	259	601	0	137	782	40828	606	509	249	115	0	28	0	9	1305	0	56517	119	0	0	115	625	213	183	387	93	305	0	58652	20426	0.149	79078
6.8	137.21	8.43	1	0.010269	-0.010571	0.009935	0.07673	78851	2.15	86	93	0	166	4415	1176	470	285712	334	344	25	81	746	32412	381	500	230	201	0	0	251	142	1587	0	56888	91	0	0	91	680	0	236	164	139	200	0	59006	20274	0.149	79280
6.9	138.21	8.43	1	0.010269	-0.010571	0.009935	0.07673	78752	2.17	65	105	0	184	4240	1163	447	289105	425	373	20	153	729	34659	329	462	98	88	0	0	0	198	1580	0	57383	97	21	0	111	599	237	120	423	136	280	0	57997	20407	0.149	78404
7	139.21	8.43	1	0.010269	-0.010571	0.009935	0.07673	80630	2.31	68	102	0	152	4154	1203	439	303873	344	401	0	43	737	35037	475	439	263	126	0	0	0	38	1356	85	57166	152	0	0	83	523	39	60	0	234	176	0	58311	20398	0.149	78709
7.1	140.21	8.44	1	0.010269	-0.010571	0.009935	0.07673	78964	2.21	72	106	0	200	4347	1194	461	275800	289	487	0	110	731	38888	397	496	236	193	0	0	0	150	1477	72	57432	0	0	0	133	663	211	85	0	124	352	0	59350	20187	0.15	79537
7.2	141.21	8.44	1	0.010269	-0.010571	0.009935	0.07673	79741	2.14	67	124	0	206	4258	1183	476	288179	363	344	0	138	681	36359	546	553	176	163	0	0	60	20	1514	0	57546	80	0	0	126	611	0	23	247	211	345	0	58548	20537	0.15	79085
7.3	142.21	8.44	1	0.010269	-0.010571	0.009935	0.07673	79648	2.17	43	82	0	175	4399	1154	492	282474	355	328	9	145	656	35990	406	544	166	126	0	30	38	14	1656	0	57037	28	0	0	183	645	109	359	221	209	344	0	60160	20563	0.15	80723
7.4	143.21	8.44	1	0.010269	-0.010571	0.009935	0.07673	80929	2.22	71	108	0	128	4317	1238	492	299674	384	382	57	125	681	38899	720	465	206	128	0	0	79	134	1633	0	57176	18	0	0	192	709	0	217	244	50	224	0	59069	20090	0.15	79159
7.5	144.21	8.44	1	0.010269	-0.010571	0.009935	0.07673	78865	2.19	61	88	0	150	4018	1150	467	289006	404	397	56	87	605	37454	615	501	218	172	0	0	104	52	1472	0	55883	129	0	0	163	655	175	76	39	139	323	0	58348	20259	0.148	78607
7.6	145.21	8.44	1	0.010269	-0.010571	0.009935	0.07673	80144	2.42	44	83	0	149	4062	1264	447	294411	320	415	0	77	584	39277	480	522	252	104	0	0	124	94	1320	0	57721	107	0	0	170	674	154	158	324	226	326	0	58830	20379	0.149	79209
7.7	146.21	8.44	1	0.010269	-0.010571	0.009935	0.07673	81229	2.27	70	95	0	191	4243	1173	463	309817	345	397	10	65	608	39179	532	563	253	160	0	0	55	22	1679	0	56452	340	0	0	91	667	148	0	454	225	433	0	58251	20259	0.148	78510
7.8	147.21	8.44	1	0.010269	-0.010571	0.009935	0.07673	80822	2.29	44	111	0	170	4126	1165	456	321641	392	339	0	107	544	35541	553	515	276	120	0	0	0	70	1365	0	55393	171	0	0	118	710	259	127	367	155	253	0	56167	19909	0.146	76076
7.9	148.21	8.44	1	0.010269	-0.010571	0.009935	0.07673	82098	2.26	46	101	0	169	3735	1238	425	333303	294	487	0	108	635	38930	571	458	246	164	0	0	47	50	1346	0	57000	46	51	0	44	659	124	0	168	147	354	0	55434	20206	0.146	75640
8	149.21	8.44	1	0.010269	-0.010571	0.009935	0.07673	77434	2.15	50	143	0	123	3445	1213	422	314188	164	448	8	121	526	36910	599	505	226	252	0	0	238	155	1286	0	53691	91	68	0	95	574	0	47	254	173	325	0	53291	19060	0.143	72351
8.1	150.21	8.43	1	0.010269	-0.010571	0.009935	0.07673	70938	2.06	51	89	0	129	3545	1068	324	254663	300	289	17	120	529	31180	498	452	133	57	0	0	19	76	1233	0	52184	62	0	0	226	579	208	0	482	158	301	0	53660	19176	0.144	72836
8.2	151.21	8.44	1	0.010269	-0.010571	0.009935	0.07673	82090	2.27	77	130	0	157	4604	1164	507	306331	294	408	4	144	597	37848	330	507	136	242	0	0	45	131	1463	0	58492	98	0	0	180	631	189	0	306	263	339	0	58360	20995	0.15	79355
8.3	152.21	8.46	1	0.010269	-0.010571	0.009935	0.07673	77389	2.34	73	52	0	125	4336	1210	461	284588	241	370	0	151	534	33680	887	523	298	170	0	0	0	186	1339	0	56670	177	0	0	82	755	314	140	290	0	300	0	57274	19627	0.147	76901
8.4	153.21	8.47	1	0.010269	-0.010571	0.009935	0.07673	78548	2.24	77	75	0	150	4317	1265	402	286929	339	303	24	137	558	34930	562	509	244	156	0	0	0	110	1444	0	56079	113	0	0	120	708	229	90	312	169	306	0	58403	19811	0.149	78214
8.5	154.21	8.47	1	0.010269	-0.010571	0.009935	0.07673	76672	2.27	46	77	0	155	4501	1160	493	266872	362	410	0	86	530	37170	666	541	211	127	0	0	97	51	1527	86	56421	0	0	0	197	666	187	190	53	91	318	0	57561	20229	0.148	77790
8.6	155.21	8.47	1	0.010269	-0.010571	0.009935	0.07673	78839	2.32	89	125	0	192	4073	1241	469	297533	414	451	38	122	606	37810	792	550	210	161	0	0	0	0	1406	0	56350	131	0	0	68	696	85	141	489	82	303	0	56466	20238	0.147	76704
8.7	156.21	8.48	1	0.010269	-0.010571	0.009935	0.07673	79789	2.14	0	83	0	157	4394	1156	457	286086	437	529	0	125	767	45267	621	439	193	264	0	0	36	204	1391	0	55711	80	0	0	103	702	152	170	161	66	355	0	57551	20338	0.148	77889
8.8	157.21	8.48	1	0.010269	-0.010571	0.009935	0.07673	80982	2.18	29	102	0	150	4682	1209	489	293224	353	434	39	147	571	41197	670	491	211	169	0	0	130	118	1408	0	57190	67	0	0	195	670	0	56	89	71	335	0	58509	20275	0.149	78784
8.9	158.21	8.48	1	0.010269	-0.010571	0.009935	0.07673	77962	2.27	91	82	0	142	4301	1269	491	281065	290	410	33	70	569	38573	650	444	187	153	0	0	57	61	1328	0	55629	12	0	0	174	633	99	133	0	164	259	0	57066	19744	0.147	76810
9	159.21	8.48	1	0.010269	-0.010571	0.009935	0.07673	81124	2.21	57	115	0	144	4474	1232	486	298556	359	414	0	41	543	41682	595	475	155	176	0	0	141	139	1393	0	57320	81	0	0	108	667	4	0	291	232	267	0	57888	20367	0.149	78255
9.1	160.21	8.47	1	0.010269	-0.010571	0.009935	0.07673	82187	2.32	76	125	0	193	4329	1291	497	306193	445	481	50	116	666	43371	476	475	276	256	0	0	62	188	1407	19	58711	175	0	0	150	781	88	49	76	209	362	0	57763	19793	0.149	77556
9.2	161.21	8.47	1	0.010269	-0.010571	0.009935	0.07673	79233	2.28	62	121	0	137	4155	1251	522	291512	350	404	37	168	642	39322	506	426	167	210	0	0	156	271	1377	0	55799	0	0	0	113	597	0	208	166	158	328	0	57212	19740	0.147	76952
9.3	162.21	8.48	1	0.010269	-0.010571	0.009935	0.07673	80375	2.16	8	142	0	116	4239	1241	505	299928	593	465	39	154	605	42491	415	454	209	108	0	0	23	98	1381	0	55838	71	0	0	57	555	26	221	631	213	288	0	57238	20015	0.147	77253
9.4	163.21	8.47	1	0.010269	-0.010571	0.009935	0.07673	80569	2.32	53	83	0	224	4267	1245	497	297780	357	522	42	68	645	41583	620	551	278	118	0	0	27	65	1523	0	56698	81	0	0	143	664	187	347	161	232	304	0	57887	20166	0.148	78053
9.5	164.21	8.47	1	0.010269	-0.010571	0.009935	0.07673	81511	2.38	66	122	0	137	4283	1279	485	311302	424	521	55	120	641	38989	247	423	293	150	0	0	5	130	1560	0	58303	417	0	0	0	731	182	34	414	337	368	0	57585	20301	0.148	77886
9.6	165.21	8.47	1	0.010269	-0.010571	0.009935	0.07673	80743	2.25	51	94	0	195	4201	1323	539	305946	440	506	43	101	604	37475	533	498	199	135	0	0	110	14	1434	0	57718	197	0	0	89	649	101	77	650	165	339	0	57052	20209	0.148	77261
9.7	166.21	8.47	1	0.010269	-0.010571	0.009935	0.07673	80318	2.18	12	74	0	183	4394	1307	420	298492	466	485	32	165	561	37926	576	521	278	170	0	0	19	34	1333	0	59428	297	0	0	95	676	167	0	211	150	304	0	57592	20328	0.148	77920
9.8	167.21	8.47	1	0.010269	-0.010571	0.009935	0.07673	81354	2.39	47	118	0	173	4190	1277	520	311799	398	466	76	64	709	37839	567	445	105	186	0	0	53	205	1407	40	57755	123	0	0	166	694	212	84	106	106	275	0	57844	20332	0.148	78176
9.9	168.21	8.47	1	0.010269	-0.010571	0.009935	0.07673	81291	2.38	72	140	0	220	4083	1274	516	319484	368	518	64	102	565	33744	607	624	205	205	0	0	0	72	1322	0	59265	0	0	0	106	652	142	98	245	234	286	0	55760	19829	0.148	75589
10	169.21	8.47	1	0.010269	-0.010571	0.009935	0.07673	80702	2.34	10	118	0	188	4130	1346	466	316114	578	419	5	83	563	36341	710	547	212	125	0	18	81	185	1397	0	57538	259	0	0	80	587	178	189	421	77	181	0	55946	20173	0.147	76119
10.1	170.21	8.47	1	0.010269	-0.010571	0.009935	0.07673	80756	2.18	10	126	0	171	3783	1393	487	318032	428	490	22	106	628	39282	280	493	183	225	0	0	69	69	1402	0	57995	0	0	0	46	649	62	113	116	348	198	0	55937	19649	0.146	75586
10.2	171.21	8.47	1	0.010269	-0.010571	0.009935	0.07673	82666	2.3	61	145	0	134	3929	1277	501	324942	342	608	33	131	677	42067	625	538	290	216	0	0	0	106	1430	0	57410	195	0	0	79	786	160	242	233	258	303	0	56857	20277	0.147	77134
10.3	172.21	8.47	1	0.010269	-0.010571	0.009935	0.07673	80071	2.3	50	147	0	148	4133	1299	545	303871	428	524	23	101	644	37673	699	465	205	246	0	0	0	96	1300	0	57906	217	20	0	120	673	63	104	241	144	376	0	55921	20100	0.147	76021
10.4	173.21	8.47	1	0.010269	-0.010571	0.009935	0.07673	82033	2.33	32	131	0	136	4069	1316	545	319559	312	612	0	172	605	37330	801	521	177	236	0	0	0	0	1245	41	59015	15	0	0	32	658	238	73	0	45	258	0	57476	20304	0.148	77780
10.5	174.21	8.47	1	0.010269	-0.010571	0.009935	0.07673	81641	2.22	28	94	0	144	3982	1320	539	318215	293	494	24	158	587	35498	552	552	237	181	0	48	0	62	1402	0	57686	242	0	0	137	646	72	124	544	252	309	0	57960	20475	0.149	78435
10.6	175.21	8.47	1	0.010269	-0.010571	0.009935	0.07673	81279	2.3	79	167	0	149	3687	1255	559	320381	302	622	0	147	623	36025	817	502	242	227	0	12	0	139	1243	0	56356	125	0	0	129	703	98	75	271	0	351	0	57090	20009	0.148	77099
10.7	176.21	8.47	1	0.010269	-0.010571	0.009935	0.07673	81153	2.27	56	126	0	122	3914	1366	437	319904	249	537	10	86	555	33955	383	588	282	202	0	53	0	149	1408	0	56330	158	0	0	76	633	146	0	218	359	333	0	57857	20407	0.148	78264
10.8	177.21	8.46	1	0.010269	-0.010571	0.009935	0.07673	80727	2.35	54	82	0	72	4064	1252	447	312811	244	475	28	117	606	33043	644	544	222	175	0	0	0	58	1467	0	56776	184	0	0	57	620	12	143	188	136	335	0	57936	20119	0.149	78055
10.9	178.21	8.46	1	0.010269	-0.010571	0.009935	0.07673	80704	2.47	0	101	0	151	3838	1329	497	312637	305	541	22	95	616	33972	749	461	250	239	0	75	72	10	1366	0	57376	221	0	0	91	625	0	194	203	109	285	0	57700	20022	0.148	77722
11	179.21	8.46	1	0.010269	-0.010571	0.009935	0.07673	79826	2.38	79	117	0	243	3927	1397	483	305520	342	556	24	76	575	34444	859	554	267	259	0	0	11	31	1358	0	56580	138	0	0	144	616	156	0	439	0	244	0	56841	20118	0.148	76959
11.1	180.21	8.46	1	0.010269	-0.010571	0.009935	0.07673	80352	2.32	64	129	0	220	4295	1257	545	297379	374	498	14	111	632	34462	784	465	295	210	0	0	0	83	1305	0	58189	93	0	0	79	789	171	29	415	27	403	0	59440	20477	0.149	79917
11.2	181.21	8.46	1	0.010269	-0.010571	0.009935	0.07673	78018	2.26	65	88	0	151	4523	1294	445	270633	368	431	0	102	608	35009	758	452	224	198	0	0	0	85	1370	0	56397	32	0	0	121	605	151	85	207	164	261	0	57960	20604	0.15	78564
11.3	182.21	8.46	1	0.010269	-0.010571	0.009935	0.07673	80237	2.21	50	78	0	131	4281	1241	583	277930	339	535	28	144	667	39025	167	471	263	148	0	0	0	169	1412	0	57119	201	0	0	172	665	102	252	214	153	335	228	60776	20569	0.151	81345
11.4	183.21	8.46	1	0.010269	-0.010571	0.009935	0.07673	83603	2.34	44	159	0	145	4393	1331	565	310081	418	545	30	162	620	36641	346	481	155	252	0	0	48	135	1400	0	58162	142	0	0	194	659	91	93	403	335	198	0	60801	20562	0.152	81363
11.5	184.21	8.46	1	0.010269	-0.010571	0.009935	0.07673	77262	2.29	38	126	0	196	3984	1294	483	282802	230	508	72	111	609	32491	967	483	301	164	0	0	0	17	1433	0	54525	93	0	0	112	689	0	239	371	0	319	0	58327	19459	0.148	77786
11.6	185.21	8.46	1	0.010269	-0.010571	0.009935	0.07673	79991	2.15	82	96	0	175	4176	1214	488	287331	343	517	5	102	610	34461	336	549	171	193	0	0	0	0	1431	0	56498	154	0	0	171	652	209	23	402	167	331	0	60174	20532	0.151	80706
11.7	186.21	8.46	1	0.010269	-0.010571	0.009935	0.07673	77005	2.17	54	92	0	169	4087	1281	488	267724	264	380	7	77	524	31647	741	461	274	195	0	0	0	126	1396	0	55254	130	0	0	123	629	378	89	668	109	228	0	60853	20768	0.15	81621
11.8	187.21	8.46	1	0.010269	-0.010571	0.009935	0.07673	80759	2.32	88	153	0	158	4182	1292	560	291137	428	501	17	83	563	34331	737	506	265	69	0	0	0	58	1533	0	56974	138	0	0	138	687	135	0	520	29	229	0	61384	20582	0.151	81966
11.9	188.21	8.45	1	0.010269	-0.010571	0.009935	0.07673	81325	2.27	49	118	0	116	4147	1207	565	299151	302	532	46	117	527	34903	757	540	277	194	0	0	38	0	1524	0	57054	19	0	0	108	655	78	67	524	96	238	0	60684	20495	0.151	81179
12	189.21	8.45	1	0.010269	-0.010571	0.009935	0.07673	79380	2.21	30	115	0	147	3970	1178	523	297424	300	462	38	79	566	33694	544	511	167	131	0	0	0	0	1407	0	55298	112	0	0	282	632	155	0	543	61	266	0	58965	20228	0.149	79193
12.1	190.21	8.45	1	0.010269	-0.010571	0.009935	0.07673	78550	2.29	59	119	0	164	3743	1223	596	298780	202	517	32	127	551	32669	625	526	174	173	0	0	0	40	1498	0	54580	189	0	0	239	649	72	77	396	144	223	0	57942	19838	0.148	77780
12.2	191.21	8.45	1	0.010269	-0.010571	0.009935	0.07673	71402	1.96	15	178	0	110	3144	1227	466	269715	247	444	73	101	563	36697	236	496	127	246	0	0	0	31	1382	49	46908	21	134	0	164	502	103	197	123	254	240	71	52792	18232	0.141	71024
12.3	192.21	8.46	1	0.010269	-0.010571	0.009935	0.07673	69314	1.91	29	116	0	145	3278	1082	476	240002	100	484	52	135	561	34540	319	434	171	48	0	0	0	17	1152	0	48210	168	125	0	95	495	5	267	438	307	273	0	54813	18753	0.144	73566
12.4	193.21	8.48	1	0.010269	-0.010571	0.009935	0.07673	85014	2.34	78	165	0	123	4349	1239	674	310476	375	583	29	164	777	47482	742	532	318	169	0	0	11	83	1372	0	56065	54	0	0	60	773	173	299	358	0	344	0	61118	21089	0.152	82207
12.5	194.21	8.49	1	0.010269	-0.010571	0.009935	0.07673	81963	2.22	47	133	0	161	4111	1205	615	295026	374	684	59	66	684	42357	559	407	374	220	0	0	0	0	1434	0	56763	0	0	0	55	758	321	0	538	353	299	0	59938	20386	0.15	80324
12.6	195.21	8.5	1	0.010269	-0.010571	0.009935	0.07673	81492	2.35	75	151	0	177	4247	1250	596	291171	313	627	13	98	694	43406	1004	595	258	291	0	0	0	57	1499	0	55773	195	0	0	104	613	194	0	288	142	320	0	60801	20516	0.15	81317
12.7	196.21	8.5	1	0.010269	-0.010571	0.009935	0.07673	81346	2.24	29	123	0	205	4356	1285	597	278862	340	608	66	95	686	48001	177	532	256	26	0	0	0	127	1502	0	55604	236	0	0	107	647	98	178	209	293	246	184	60874	20680	0.151	81554
12.8	197.21	8.5	1	0.010269	-0.010571	0.009935	0.07673	80139	2.16	41	116	0	136	4418	1265	702	268080	453	613	56	111	729	45963	417	489	216	135	0	0	0	132	1483	0	55155	156	0	0	144	651	217	0	242	275	339	0	60718	20844	0.151	81562
12.9	198.21	8.5	1	0.010269	-0.010571	0.009935	0.07673	79121	2.03	56	94	0	144	4447	1246	660	255844	288	562	68	76	658	47715	20	498	288	61	0	0	100	38	1456	0	53685	196	0	0	33	718	61	129	201	344	314	397	60858	20512	0.151	81370
13	199.21	8.5	1	0.010269	-0.010571	0.009935	0.07673	77161	2.1	88	84	0	146	4497	1234	678	233898	414	626	59	120	746	51586	245	484	288	203	0	0	16	101	1393	0	51712	92	0	0	124	659	54	94	23	436	212	0	61159	20682	0.15	81841
13.1	200.21	8.5	1	0.010269	-0.010571	0.009935	0.07673	77128	2.11	18	51	0	75	4771	1237	649	229771	401	588	67	69	701	49465	653	430	144	187	0	0	0	25	1369	174	53201	73	0	0	246	624	72	151	57	98	339	0	61226	20227	0.152	81453
13.2	201.21	8.5	1	0.010269	-0.010571	0.009935	0.07673	78469	2.04	86	145	0	108	4906	1183	677	237508	367	564	28	117	709	51546	231	423	160	212	0	0	0	87	1487	0	52904	69	69	0	247	804	76	20	287	460	280	43	61131	20606	0.152	81737
13.3	202.21	8.5	1	0.010269	-0.010571	0.009935	0.07673	78228	2.16	61	115	0	141	4559	1265	740	242133	309	735	92	201	694	53863	447	463	189	168	0	0	0	104	1417	0	52600	207	0	0	229	609	156	89	292	273	308	0	60815	20178	0.15	80993
13.4	203.21	8.5	1	0.010269	-0.010571	0.009935	0.07673	77309	2.03	46	96	0	139	4762	1247	649	234016	316	566	46	109	695	49475	380	489	309	147	0	0	0	12	1519	0	52701	36	0	0	114	670	159	0	180	266	399	0	60593	20442	0.151	81035
13.5	204.21	8.51	1	0.010269	-0.010571	0.009935	0.07673	77818	2.09	47	96	0	193	4561	1235	694	245403	405	572	77	82	657	47343	407	488	184	88	0	0	4	67	1368	0	53585	156	0	0	141	785	94	64	660	228	355	0	60624	20290	0.15	80914
13.6	205.21	8.5	1	0.010269	-0.010571	0.009935	0.07673	79390	2.02	56	118	0	174	4446	1230	634	260369	401	599	56	134	734	48978	377	428	216	114	0	0	0	41	1496	25	54339	45	0	0	187	624	195	167	352	172	292	103	61013	20899	0.151	81912
13.7	206.21	8.51	1	0.010269	-0.010571	0.009935	0.07673	79427	2.09	33	106	0	179	4553	1279	603	258661	397	527	100	167	680	46802	575	520	303	209	0	0	102	84	1443	0	54070	113	0	0	139	812	84	131	331	246	323	0	60655	20874	0.151	81529
13.8	207.21	8.51	1	0.010269	-0.010571	0.009935	0.07673	77035	1.99	44	62	0	119	4886	1286	598	229754	527	561	74	173	713	48089	359	475	166	152	0	0	0	46	1380	87	53908	88	0	0	192	729	268	90	174	271	338	14	61575	20731	0.151	82306
13.9	208.21	8.5	1	0.010269	-0.010571	0.009935	0.07673	77630	1.95	76	69	0	145	4867	1169	658	230893	406	524	69	130	746	48426	438	420	169	240	0	0	0	0	1470	0	54210	95	0	0	224	728	47	265	80	331	312	0	60909	20733	0.152	81642
14	209.21	8.51	1	0.010269	-0.010571	0.009935	0.07673	76906	1.93	15	87	0	188	4840	1389	653	224687	338	620	113	90	752	50777	475	463	262	282	0	0	0	43	1475	0	53013	55	32	0	249	643	227	0	398	268	389	0	61670	20674	0.151	82344
14.1	210.21	8.51	1	0.010269	-0.010571	0.009935	0.07673	77219	2.08	51	98	0	121	4509	1324	682	234855	355	612	67	136	701	49930	405	475	348	286	0	0	28	155	1577	0	53042	176	0	0	186	626	0	249	436	342	310	0	60592	20808	0.151	81400
14.2	211.21	8.51	1	0.010269	-0.010571	0.009935	0.07673	76648	2.11	48	86	0	193	4573	1261	610	233939	289	667	35	171	682	47998	305	429	269	112	0	0	0	207	1403	0	53434	291	0	0	204	705	82	168	431	381	313	0	60125	20820	0.151	80945
14.3	212.21	8.5	1	0.010269	-0.010571	0.009935	0.07673	77891	2.09	69	90	0	160	4566	1223	639	245958	423	605	103	127	755	52139	609	489	295	221	0	0	0	27	1395	0	52851	149	0	0	129	725	146	106	352	242	384	0	59474	20341	0.15	79815
14.4	213.21	8.51	1	0.010269	-0.010571	0.009935	0.07673	76336	1.95	68	121	0	126	4535	1150	656	232781	388	622	79	200	783	52826	453	553	289	297	0	0	0	83	1488	0	51970	187	0	0	112	818	141	63	150	154	224	0	59233	20246	0.149	79479
14.5	214.21	8.51	1	0.010269	-0.010571	0.009935	0.07673	76495	1.93	27	100	0	144	4688	1254	650	229886	235	650	54	130	834	51899	364	494	363	231	0	0	0	208	1415	0	52799	113	0	0	146	668	166	309	369	284	323	0	60043	20372	0.149	80415
14.6	215.21	8.51	1	0.010269	-0.010571	0.009935	0.07673	77994	2.2	36	83	0	175	4720	1237	648	236733	345	708	101	121	826	53925	16	466	245	209	0	0	0	76	1507	0	53601	68	0	0	218	625	239	191	419	387	406	492	60242	20390	0.151	80632
14.7	216.21	8.51	1	0.010269	-0.010571	0.009935	0.07673	79301	2.11	45	95	0	104	4470	1265	653	250317	486	741	55	140	862	53681	287	446	263	158	0	0	0	54	1483	0	54258	110	0	0	72	616	269	249	260	393	352	68	60472	20634	0.151	81106
14.8	217.21	8.51	1	0.010269	-0.010571	0.009935	0.07673	79902	2.09	39	120	0	204	4406	1285	627	256097	418	695	130	98	890	54996	399	471	307	187	0	0	0	71	1414	20	53319	146	62	0	111	688	201	261	186	353	374	0	60561	20447	0.15	81008
14.9	218.21	8.51	1	0.010269	-0.010571	0.009935	0.07673	77938	2.06	97	130	0	107	3944	1355	653	267301	408	591	85	137	777	48604	402	482	311	210	0	0	0	114	1422	0	52036	220	0	0	100	748	160	222	429	309	397	0	58168	20245	0.148	78413
15	219.21	8.51	1	0.010269	-0.010571	0.009935	0.07673	76228	2.03	63	136	0	184	3866	1342	603	252257	326	687	34	156	700	48914	315	471	210	133	0	0	0	54	1474	0	51725	219	55	0	57	658	170	148	222	244	332	66	58351	20070	0.148	78421
15.1	220.21	8.51	1	0.010269	-0.010571	0.009935	0.07673	75829	2.12	46	146	0	145	4181	1272	617	234070	313	682	91	149	834	52088	348	516	299	240	0	0	89	10	1288	0	51806	291	0	0	178	637	44	143	466	274	399	35	58714	20459	0.148	79173
15.2	221.21	8.51	1	0.010269	-0.010571	0.009935	0.07673	76753	2	74	124	0	137	4537	1198	705	229058	472	677	47	174	895	55560	559	487	393	290	0	33	110	178	1457	0	51366	78	0	0	108	811	129	113	216	268	421	0	59223	20473	0.15	79696
15.3	222.21	8.51	1	0.010269	-0.010571	0.009935	0.07673	78036	1.9	32	97	0	148	4562	1374	686	243829	252	797	74	156	907	55031	332	482	408	231	0	0	0	91	1426	0	52289	50	0	0	140	707	287	162	321	333	306	0	58643	20372	0.15	79015
15.4	223.21	8.51	1	0.010269	-0.010571	0.009935	0.07673	78946	2.05	42	148	0	148	4517	1241	645	249185	416	768	49	76	862	58289	430	442	371	202	0	0	0	139	1401	0	53009	97	0	0	45	608	107	122	205	351	297	0	60054	20156	0.149	80210
15.5	224.21	8.51	1	0.010269	-0.010571	0.009935	0.07673	81186	2.19	84	160	0	172	4231	1312	687	269410	352	813	52	113	921	61841	369	440	173	237	0	0	35	119	1199	0	51996	142	0	0	162	702	39	104	218	379	319	0	59075	20083	0.149	79158
15.6	225.21	8.51	1	0.010269	-0.010571	0.009935	0.07673	80642	2.06	15	143	0	130	4666	1260	642	245923	376	845	115	108	933	61610	614	501	293	209	0	38	83	38	1561	0	53104	242	0	0	93	743	108	197	80	314	446	0	61600	20806	0.152	82406
15.7	226.21	8.51	1	0.010269	-0.010571	0.009935	0.07673	81657	2.07	32	170	0	159	4332	1225	720	262470	399	927	102	102	881	60469	729	451	401	239	0	0	0	7	1393	0	52861	188	0	0	88	616	204	71	286	268	338	0	61545	20728	0.151	82273
15.8	227.21	8.5	1	0.010269	-0.010571	0.009935	0.07673	82736	2.21	32	146	0	154	4135	1360	670	270503	258	891	81	158	930	63756	349	536	347	236	0	0	55	108	1502	0	52800	112	0	0	111	695	43	50	500	398	388	15	61003	20772	0.151	81775
15.9	228.21	8.51	1	0.010269	-0.010571	0.009935	0.07673	76171	2.1	83	207	0	204	3035	1416	658	270938	295	903	110	101	832	59279	537	475	222	261	0	0	8	23	1171	76	47494	225	0	0	110	653	101	72	245	279	425	0	56470	19217	0.143	75687
16	229.21	8.51	1	0.010269	-0.010571	0.009935	0.07673	68644	1.97	54	204	0	78	2723	1308	659	244157	171	873	114	82	796	57429	374	409	385	215	0	37	0	98	1096	0	41942	121	10	0	73	660	116	0	101	431	319	0	48906	17105	0.136	66011
16.1	230.21	8.51	1	0.010269	-0.010571	0.009935	0.07673	46913	1.55	18	79	0	32	1618	1173	371	127465	198	441	53	83	416	30120	145	302	153	85	0	0	0	0	723	9	33498	249	269	0	43	361	0	63	230	201	217	110	44457	15416	0.135	59873
16.2	231.21	8.53	1	0.010269	-0.010571	0.009935	0.07673	89732	2.34	74	215	0	195	4933	1266	830	295493	440	1036	163	158	1145	74981	854	513	439	326	0	0	115	55	1574	0	55927	205	0	0	100	799	21	193	709	255	406	0	62597	21744	0.155	84341
16.3	232.21	8.54	1	0.010269	-0.010571	0.009935	0.07673	83409	2.33	16	224	0	69	3717	1288	782	294993	172	1012	147	122	1014	68164	684	569	304	392	0	0	0	22	1338	0	51894	56	0	0	156	791	132	6	401	238	479	0	56651	20030	0.147	76681
16.4	233.21	8.55	1	0.010269	-0.010571	0.009935	0.07673	82208	2.14	46	205	0	143	3346	1415	760	294228	338	905	138	138	948	65447	561	534	360	359	0	0	109	24	1301	0	51011	170	0	0	229	733	15	137	274	434	378	0	56764	20100	0.146	76864
16.5	234.21	8.56	1	0.010269	-0.010571	0.009935	0.07673	82278	2.12	59	211	0	210	3317	1349	807	298240	235	1000	125	149	929	62713	383	545	321	215	0	0	22	93	1425	0	52264	161	0	0	84	666	156	130	255	379	500	0	57294	19996	0.147	77290
16.6	235.21	8.55	1	0.010269	-0.010571	0.009935	0.07673	83071	2.22	44	169	0	98	3516	1410	715	303375	229	950	62	134	932	60263	558	503	388	236	0	0	0	44	1538	0	53507	146	70	0	85	662	138	110	310	397	317	0	58375	20383	0.147	78758
16.7	236.21	8.56	1	0.010269	-0.010571	0.009935	0.07673	82630	2.3	35	207	0	123	3484	1345	704	301095	292	882	117	108	867	57343	371	473	299	234	0	0	0	0	1384	20	53278	141	0	0	110	633	86	140	130	569	348	0	58893	20357	0.148	79250
16.8	237.21	8.55	1	0.010269	-0.010571	0.009935	0.07673	83030	2.26	56	227	0	213	3719	1369	687	306736	112	895	44	149	868	54609	933	598	367	273	0	53	96	73	1502	0	53822	274	0	0	123	682	108	231	484	100	363	0	58240	20491	0.148	78731
16.9	238.21	8.55	1	0.010269	-0.010571	0.009935	0.07673	81466	2.25	102	194	0	126	3657	1323	631	308250	247	698	106	103	763	47363	584	586	242	215	0	0	0	7	1574	0	53996	136	0	0	157	603	58	86	548	207	331	0	56750	19993	0.146	76743
17	239.21	8.55	1	0.010269	-0.010571	0.009935	0.07673	81795	2.15	99	172	0	143	3477	1341	712	309506	366	818	36	105	770	49150	175	536	315	199	0	0	0	123	1537	0	53625	178	103	0	133	799	129	233	321	380	374	297	57431	20055	0.147	77486
17.1	240.21	8.55	1	0.010269	-0.010571	0.009935	0.07673	83304	2.2	56	164	0	131	3680	1345	695	304411	168	895	57	126	922	58589	662	524	274	283	0	0	0	105	1504	0	53707	90	0	0	66	676	168	19	356	260	316	0	58518	20676	0.148	79194
17.2	241.21	8.54	1	0.010269	-0.010571	0.009935	0.07673	85195	2.16	19	203	0	107	3850	1419	729	293018	389	1002	90	157	948	66409	107	605	338	207	0	0	0	0	1440	0	53841	222	0	0	94	696	184	181	488	455	360	354	61388	20880	0.151	82268
17.3	242.21	8.54	1	0.010269	-0.010571	0.009935	0.07673	81906	2.1	119	185	0	103	3489	1403	780	274511	196	1178	98	142	1007	75608	440	485	380	300	0	0	39	68	1248	0	49657	180	0	0	188	674	55	214	481	458	401	119	57563	20121	0.148	77684
17.4	243.21	8.51	1	0.010269	-0.010571	0.009935	0.07673	81444	2.16	66	230	0	147	3109	1374	799	286767	310	1167	188	141	1092	72728	408	488	396	324	0	18	0	109	1263	0	49116	139	0	0	34	649	88	229	371	468	442	0	56614	19999	0.145	76613
17.5	244.21	8.5	1	0.010269	-0.010571	0.009935	0.07673	85260	2.29	103	259	0	110	3186	1236	801	307949	204	1187	99	146	1134	77944	727	490	375	281	0	0	0	0	1233	0	49231	83	97	0	174	618	117	193	380	276	376	0	56968	20365	0.147	77333
17.6	245.21	8.5	1	0.010269	-0.010571	0.009935	0.07673	87315	2.31	51	273	0	132	3148	1270	931	309594	148	1355	136	190	1206	85759	741	597	435	424	46	16	79	0	1380	0	48787	98	0	0	63	733	77	0	0	406	578	0	58184	19897	0.148	78081
17.7	246.21	8.5	1	0.010269	-0.010571	0.009935	0.07673	76170	2.09	35	221	0	55	2659	1237	673	260759	58	1166	49	88	1007	68052	498	447	286	330	0	0	0	62	1224	0	43568	87	0	0	226	575	89	0	262	409	381	0	54264	18919	0.144	73183
17.8	247.21	8.51	1	0.010269	-0.010571	0.009935	0.07673	79870	2	62	202	0	103	2831	1165	684	258175	303	1126	134	187	1048	72402	650	455	417	318	0	0	0	16	1215	60	43312	176	66	0	82	588	88	392	81	343	417	0	61367	20300	0.15	81667
17.9	248.21	8.52	1	0.010269	-0.010571	0.009935	0.07673	81040	1.89	28	255	0	56	3164	1167	729	255087	106	1190	104	178	948	73410	253	493	409	264	0	0	14	21	1289	352	35156	56	90	0	208	528	0	237	0	459	461	215	67527	20469	0.152	87996
18	249.21	8.53	1	0.010269	-0.010571	0.009935	0.07673	74665	1.73	30	147	0	125	3258	1111	660	214477	111	1045	133	210	1037	71503	431	440	400	285	0	0	0	0	1466	0	29887	276	0	0	91	601	336	379	364	494	470	27	65509	19540	0.149	85049
18.1	250.21	8.55	1	0.010269	-0.010571	0.009935	0.07673	81431	1.99	38	180	0	119	3586	1124	764	242084	0	1267	60	184	1206	84348	598	345	357	286	0	0	0	0	1125	0	33063	339	0	0	168	606	66	28	563	370	491	0	66425	19853	0.151	86278
18.2	251.21	8.57	1	0.010269	-0.010571	0.009935	0.07673	79948	1.89	13	194	0	120	3646	1144	753	233786	338	1174	156	171	1194	81273	177	450	451	249	0	0	0	10	1445	0	33366	197	0	0	142	604	138	92	542	512	476	608	66593	19686	0.151	86279
18.3	252.21	8.6	1	0.010269	-0.010571	0.009935	0.07673	76896	1.87	45	126	0	71	3558	1204	773	221050	121	1082	141	216	1143	77665	447	456	404	335	0	0	0	207	1309	60	33270	279	70	0	166	611	161	194	337	516	413	0	64234	19726	0.148	83960
18.4	253.21	8.63	1	0.010269	-0.010571	0.009935	0.07673	78223	1.83	61	163	0	122	3347	1306	796	226079	188	1188	89	177	1242	86119	564	441	398	343	7	0	0	103	1331	117	33475	99	64	0	116	757	184	96	333	360	475	0	63449	19382	0.148	82831
18.5	254.21	8.64	1	0.010269	-0.010571	0.009935	0.07673	79273	1.89	52	213	0	153	3234	1284	898	238670	235	1306	123	142	1168	84523	286	484	376	390	0	0	0	67	1375	0	34192	159	0	0	172	684	319	187	378	550	345	292	63258	19303	0.147	82561
18.6	255.21	8.66	1	0.010269	-0.010571	0.009935	0.07673	79032	1.98	64	178	0	163	3258	1322	748	251128	333	1139	124	176	1080	77960	59	516	279	351	0	0	7	0	1342	93	37781	132	0	0	162	539	113	181	214	358	343	665	60391	19358	0.147	79749
18.7	256.21	8.66	1	0.010269	-0.010571	0.009935	0.07673	77818	2.14	70	175	0	130	3651	1373	715	253967	347	1000	126	109	958	68706	171	465	314	189	0	0	0	156	1352	0	43627	136	0	0	78	595	46	81	203	453	360	357	57386	19034	0.145	76420
18.8	257.21	8.67	1	0.010269	-0.010571	0.009935	0.07673	76283	1.94	45	166	0	184	3836	1335	699	253985	222	912	85	112	1065	60048	185	489	340	192	0	0	0	85	1265	0	48496	164	0	0	61	694	189	0	246	464	344	109	56200	19039	0.144	75239
18.9	258.21	8.68	1	0.010269	-0.010571	0.009935	0.07673	75856	1.98	0	200	0	109	3568	1380	612	256812	289	1047	116	93	968	61886	245	492	320	122	0	63	0	91	1291	0	47497	288	101	0	107	623	99	245	464	390	340	255	55464	19112	0.143	74576
19	259.21	8.69	1	0.010269	-0.010571	0.009935	0.07673	76356	2.1	31	163	0	152	3348	1385	662	267384	242	908	111	127	941	58983	428	436	241	236	0	0	83	0	1247	0	47053	240	276	0	107	576	82	70	425	365	332	0	54802	19303	0.144	74105
19.1	260.21	8.7	1	0.010269	-0.010571	0.009935	0.07673	76095	2.06	30	182	0	110	3342	1456	618	262729	246	881	105	135	861	61128	510	500	400	257	0	65	4	55	1176	0	47679	206	0	0	29	627	96	70	248	303	292	0	55477	18791	0.143	74268
19.2	261.21	8.7	1	0.010269	-0.010571	0.009935	0.07673	76248	2.1	45	147	0	140	3414	1429	613	276823	313	802	128	90	764	50605	392	527	360	164	0	0	0	63	1301	84	49354	129	0	0	45	651	93	52	53	251	259	0	55499	19033	0.144	74532
19.3	262.21	8.7	1	0.010269	-0.010571	0.009935	0.07673	76797	2.07	23	146	0	90	3418	1366	635	270289	319	876	104	97	836	58355	249	448	292	254	0	0	0	46	1213	0	47189	125	0	0	110	579	186	174	217	358	347	240	55791	18949	0.143	74740
19.4	263.21	8.7	1	0.010269	-0.010571	0.009935	0.07673	76851	2.17	21	147	0	130	3615	1356	716	254798	291	938	120	119	912	66341	299	430	328	263	0	0	0	22	1278	0	45473	97	119	0	169	615	160	0	272	425	411	236	55817	19378	0.144	75195
19.5	264.21	8.7	1	0.010269	-0.010571	0.009935	0.07673	79112	2.05	79	225	0	133	3593	1402	716	260540	407	1036	187	123	1004	72059	321	496	377	254	0	0	30	0	1331	187	46743	78	0	0	93	714	49	116	0	489	390	75	57034	19658	0.146	76692
19.6	265.21	8.71	1	0.010269	-0.010571	0.009935	0.07673	77872	2.05	31	182	0	74	3330	1423	819	244544	256	1143	114	167	1036	74962	387	454	495	267	0	52	54	205	1350	0	45698	118	128	0	82	695	166	220	326	379	435	174	57658	19658	0.146	77316
19.7	266.21	8.71	1	0.010269	-0.010571	0.009935	0.07673	79005	1.91	53	185	0	85	3451	1312	811	246237	205	1159	158	131	1073	77322	274	435	405	284	0	0	0	0	1425	0	47640	81	0	0	146	660	286	199	216	586	387	68	57626	19967	0.147	77593
19.8	267.21	8.71	1	0.010269	-0.010571	0.009935	0.07673	78663	2.01	86	203	0	57	3549	1354	711	248859	324	1133	148	124	1073	73741	441	501	413	241	0	0	0	80	1364	0	48021	245	0	0	125	677	232	0	262	481	329	0	57678	19870	0.146	77548
19.9	268.21	8.7	1	0.010269	-0.010571	0.009935	0.07673	77131	2.16	36	181	0	117	3813	1405	728	233264	179	1117	152	149	1153	74397	739	538	380	260	0	0	0	65	1455	0	47613	0	0	0	171	699	74	10	590	426	412	0	58319	20220	0.146	78539
20	269.21	8.7	1	0.010269	-0.010571	0.009935	0.07673	76185	2.03	20	140	0	97	3815	1391	729	230626	324	940	198	168	1085	71732	564	444	388	310	0	13	0	82	1454	0	46144	41	0	0	161	639	136	145	447	499	397	0	57278	19386	0.145	76664
20.1	270.21	8.7	1	0.010269	-0.010571	0.009935	0.07673	75999	1.96	34	172	0	109	3707	1368	748	236489	287	1048	139	200	979	71633	283	484	419	375	0	0	0	97	1272	0	45021	255	0	0	153	688	74	0	354	531	355	0	56009	19767	0.144	75776
20.2	271.21	8.7	1	0.010269	-0.010571	0.009935	0.07673	77849	2.01	21	190	0	101	3821	1352	719	239630	180	1161	76	130	1056	76402	329	489	322	345	0	0	0	104	1165	38	46248	0	0	0	197	732	65	130	269	582	400	0	57462	19907	0.147	77369
20.3	272.21	8.71	1	0.010269	-0.010571	0.009935	0.07673	82195	2.24	61	177	0	148	3847	1462	858	257569	179	1341	129	134	1219	84231	0	477	335	300	0	0	0	137	1380	0	48747	160	0	0	208	730	149	52	190	738	428	662	58901	20049	0.148	78950
20.4	273.21	8.7	1	0.010269	-0.010571	0.009935	0.07673	81175	1.94	58	189	0	108	3674	1383	883	249862	201	1329	119	178	1212	86156	716	461	415	259	0	28	0	84	1410	59	47381	175	0	0	119	638	81	329	0	331	493	0	58240	20328	0.147	78568
20.5	274.21	8.7	1	0.010269	-0.010571	0.009935	0.07673	81198	2.13	67	133	0	73	3754	1375	762	252767	262	1321	160	183	1120	83180	376	502	291	393	0	0	0	10	1518	0	48246	145	0	0	96	678	134	334	388	531	336	0	58383	20226	0.147	78609
20.6	275.21	8.68	1	0.010269	-0.010571	0.009935	0.07673	81383	2.1	89	195	0	146	3876	1406	798	254613	288	1187	150	154	1179	82700	325	471	406	336	0	0	0	139	1341	289	48362	28	0	0	155	746	186	69	0	554	478	135	58192	20273	0.148	78465
20.7	276.21	8.67	1	0.010269	-0.010571	0.009935	0.07673	80935	2.09	66	216	0	107	3894	1363	779	253574	377	1115	136	123	1133	80471	924	524	352	353	0	0	0	60	1360	0	49046	188	14	0	164	742	101	97	374	261	441	0	57972	20176	0.148	78148
20.8	277.21	8.66	1	0.010269	-0.010571	0.009935	0.07673	83065	2.16	46	190	0	95	3747	1402	862	266481	213	1252	179	139	1201	80784	214	475	297	327	0	0	0	0	1298	0	51636	143	0	0	115	599	104	57	306	660	388	118	58514	20677	0.15	79191
20.9	278.21	8.65	1	0.010269	-0.010571	0.009935	0.07673	83228	2.16	72	177	0	124	3868	1470	826	265546	267	1204	116	174	1149	81283	241	518	324	329	0	0	25	0	1425	0	52628	153	0	0	228	618	132	359	290	645	471	35	59020	20385	0.149	79405
21	279.21	8.64	1	0.010269	-0.010571	0.009935	0.07673	82074	2.15	61	176	0	133	3869	1377	680	266582	343	1226	161	116	1060	74359	623	512	395	312	0	15	0	80	1477	0	51536	122	0	0	172	671	192	199	141	326	386	0	58062	20186	0.149	78248
21.1	280.21	8.63	1	0.010269	-0.010571	0.009935	0.07673	82769	2.19	28	238	0	151	3742	1376	729	273346	279	1183	141	160	1091	75519	620	577	379	416	0	0	48	102	1565	0	49664	49	0	0	182	751	76	95	405	461	456	0	58167	20411	0.149	78578
21.2	281.21	8.62	1	0.010269	-0.010571	0.009935	0.07673	82457	2.12	73	222	0	175	3709	1378	752	273111	332	1171	101	188	1089	75638	718	522	430	215	0	0	0	185	1403	0	50358	130	0	0	195	752	162	118	358	385	453	0	58948	20369	0.148	79317
21.3	282.21	8.61	1	0.010269	-0.010571	0.009935	0.07673	82792	2.14	88	257	0	187	3680	1419	834	275928	284	1161	103	156	1030	75556	392	476	369	218	0	14	4	31	1233	61	51235	194	0	0	73	622	69	295	165	515	401	0	58340	20489	0.148	78829
21.4	283.21	8.61	1	0.010269	-0.010571	0.009935	0.07673	82659	2.15	92	252	0	125	3736	1316	814	263569	249	1267	150	133	1194	83313	856	524	378	356	0	0	0	29	1328	0	48907	145	0	0	167	736	283	50	337	320	428	0	58516	20278	0.148	78794
21.5	284.21	8.6	1	0.010269	-0.010571	0.009935	0.07673	82755	2.09	49	222	0	150	3862	1428	825	257405	220	1336	160	179	1203	89540	333	506	382	308	0	0	0	47	1410	0	47402	105	157	0	123	714	160	56	248	540	378	209	57430	20241	0.148	77671
21.6	285.21	8.59	1	0.010269	-0.010571	0.009935	0.07673	82949	2.06	42	225	0	128	3795	1377	911	259027	267	1324	275	139	1280	91792	266	547	434	323	0	0	18	51	1265	0	48014	168	0	0	150	725	72	209	507	737	494	48	57527	20262	0.148	77789
21.7	286.21	8.58	1	0.010269	-0.010571	0.009935	0.07673	84013	2.09	37	226	0	145	3782	1262	892	260321	284	1409	197	187	1270	95358	597	454	466	366	0	0	0	143	1462	113	48292	296	0	0	154	827	133	278	100	529	500	0	58000	20229	0.148	78229
21.8	287.21	8.56	1	0.010269	-0.010571	0.009935	0.07673	84980	2.12	112	252	0	121	3733	1333	868	273181	185	1496	77	128	1315	92099	884	505	476	358	0	0	97	61	1480	0	48704	117	0	0	97	825	74	0	75	427	519	0	59343	20513	0.148	79856
21.9	288.21	8.55	1	0.010269	-0.010571	0.009935	0.07673	85527	2.2	55	252	0	141	3771	1367	885	274020	277	1345	154	143	1240	96961	940	549	365	318	0	0	37	0	1203	63	47365	62	0	0	201	740	87	371	0	439	479	0	59264	20638	0.148	79902
22	289.21	8.55	1	0.010269	-0.010571	0.009935	0.07673	84975	2.05	58	201	0	169	3837	1331	911	269499	336	1332	159	105	1335	92893	249	482	356	392	0	0	0	0	1312	31	48602	223	0	0	176	687	197	53	313	696	387	188	59058	20486	0.149	79544
22.1	290.21	8.54	1	0.010269	-0.010571	0.009935	0.07673	83376	2.05	65	179	0	175	4296	1307	920	250357	454	1358	162	152	1292	93231	824	475	442	264	0	0	74	96	1294	0	48350	56	0	0	111	782	0	486	374	270	501	0	58791	20588	0.149	79379
22.2	291.21	8.54	1	0.010269	-0.010571	0.009935	0.07673	80578	1.97	93	207	0	125	3862	1395	812	245816	241	1382	190	145	1292	88612	470	490	447	338	32	0	0	33	1411	0	46830	177	0	0	56	720	208	131	122	498	398	66	56827	20159	0.146	76986
22.3	292.21	8.53	1	0.010269	-0.010571	0.009935	0.07673	78050	1.98	77	210	0	138	3485	1259	814	242782	248	1181	184	84	1157	82339	417	534	368	290	0	0	0	6	1311	0	45388	302	45	0	136	700	125	83	273	377	434	185	56539	19425	0.145	75964
22.4	293.21	8.52	1	0.010269	-0.010571	0.009935	0.07673	82359	2	60	197	0	121	3823	1237	875	248106	156	1449	232	137	1327	95778	524	466	518	345	158	5	10	0	1362	39	44965	83	83	0	46	722	58	113	248	605	445	0	58187	20817	0.147	79004
22.5	294.21	8.52	1	0.010269	-0.010571	0.009935	0.07673	83289	2.03	86	221	0	136	3998	1303	955	247694	209	1476	269	114	1389	103949	267	412	380	400	0	0	47	22	1255	77	43005	245	6	0	189	706	0	506	0	574	536	636	57677	20339	0.147	78016
22.6	295.21	8.51	1	0.010269	-0.010571	0.009935	0.07673	83149	1.91	65	196	0	155	3847	1239	887	239068	0	1681	226	122	1539	111455	521	418	529	327	0	59	0	58	1369	0	42943	20	0	0	140	674	273	144	0	470	552	248	57308	20108	0.146	77416
22.7	296.21	8.51	1	0.010269	-0.010571	0.009935	0.07673	83939	1.98	80	255	0	117	3832	1246	897	260933	89	1439	212	104	1323	96970	524	488	360	319	0	0	0	6	1261	70	45803	0	0	0	165	696	260	204	143	463	441	218	57574	20073	0.147	77647
22.8	297.21	8.5	1	0.010269	-0.010571	0.009935	0.07673	85697	2.21	67	273	0	92	3807	1335	958	289195	383	1407	214	100	1194	87088	446	495	361	331	0	0	0	132	1355	0	48605	242	0	0	136	622	63	0	265	444	469	11	58869	20396	0.148	79265
22.9	298.21	8.49	1	0.010269	-0.010571	0.009935	0.07673	85516	2.21	58	253	0	138	3825	1294	919	276538	142	1542	209	165	1321	94163	512	438	415	289	0	0	0	74	1389	0	48458	130	6	0	169	710	140	97	265	444	427	58	57647	20417	0.148	78064
23	299.21	8.48	1	0.010269	-0.010571	0.009935	0.07673	86610	2.14	88	330	0	157	3842	1223	964	274102	331	1512	205	171	1371	100665	154	500	387	297	0	0	0	99	1425	0	47223	189	64	0	142	700	211	156	189	728	499	553	57856	20410	0.149	78266
23.1	300.21	8.47	1	0.010269	-0.010571	0.009935	0.07673	85851	2	66	237	0	93	3924	1161	879	273958	182	1486	106	92	1347	96394	482	485	510	346	0	0	0	44	1513	13	46923	27	0	0	135	844	129	121	238	609	542	0	57356	20280	0.148	77636
23.2	301.21	8.46	1	0.010269	-0.010571	0.009935	0.07673	87463	2.14	65	232	0	138	4081	1292	895	296657	139	1385	105	184	1209	85837	350	459	415	246	0	0	0	148	1357	0	51838	189	0	0	76	674	100	111	167	573	489	0	58782	21043	0.149	79825
23.3	302.21	8.46	1	0.010269	-0.010571	0.009935	0.07673	87065	2.23	66	265	0	118	3923	1184	936	289613	256	1436	206	209	1230	90572	427	448	316	309	0	0	0	28	1309	0	50052	151	0	0	105	643	37	182	258	446	476	26	58878	20708	0.149	79586
23.4	303.21	8.45	1	0.010269	-0.010571	0.009935	0.07673	87836	2.1	66	316	0	132	3841	1219	999	279195	315	1608	219	171	1482	106132	448	518	506	371	0	0	0	67	1369	0	47860	183	0	0	91	751	141	225	383	515	487	138	57479	20630	0.148	78109
23.5	304.21	8.44	1	0.010269	-0.010571	0.009935	0.07673	89093	2.12	110	350	0	160	3717	1240	1083	272955	244	1853	184	198	1643	121499	818	452	560	366	22	0	0	10	1253	55	46212	9	0	0	81	834	132	161	42	591	501	0	58495	20808	0.148	79303
23.6	305.21	8.43	1	0.010269	-0.010571	0.009935	0.07673	86304	2.03	85	264	0	128	4556	1160	965	245634	194	1705	219	180	1659	117016	191	488	455	320	0	75	16	166	1351	0	46339	51	0	0	245	740	0	210	88	598	541	697	58464	20694	0.148	79158
23.7	306.21	8.42	1	0.010269	-0.010571	0.009935	0.07673	87453	2.1	7	223	0	182	4360	1279	1006	259545	212	1601	275	172	1527	112078	333	406	385	189	0	0	42	19	1502	0	46934	97	0	0	172	631	59	197	212	618	498	401	58281	20905	0.149	79186
23.8	307.21	8.4	1	0.010269	-0.010571	0.009935	0.07673	89326	2.2	52	252	0	140	4515	1114	999	271969	320	1652	242	180	1575	113264	380	565	489	395	16	36	110	136	1368	0	49040	24	0	0	172	746	26	211	219	713	655	205	58794	21348	0.15	80142
23.9	308.21	8.39	1	0.010269	-0.010571	0.009935	0.07673	91462	2.17	76	314	0	189	4273	1248	1025	297861	195	1744	238	161	1531	112900	456	528	425	505	0	0	134	108	1483	0	49969	97	0	0	213	805	118	587	530	653	559	179	57888	21038	0.15	78926
24	309.21	8.36	1	0.010269	-0.010571	0.009935	0.07673	94259	2.3	68	320	0	221	4356	1267	1044	307455	245	1839	181	185	1727	118376	555	480	474	365	0	0	9	0	1298	132	51437	86	0	0	132	771	0	221	0	585	593	147	58364	21595	0.152	79959
24.1	310.21	8.35	1	0.010269	-0.010571	0.009935	0.07673	94744	2.21	76	303	0	135	4501	1147	1205	298850	109	1959	192	228	1699	122414	578	459	516	420	0	0	0	29	1434	21	51702	143	0	0	69	731	322	133	343	573	542	19	59888	21986	0.153	81874
24.2	311.21	8.33	1	0.010269	-0.010571	0.009935	0.07673	95642	2.35	82	337	0	186	4437	1233	1142	296133	150	2105	334	216	1607	129779	465	503	519	437	0	0	0	0	1407	0	51663	62	0	0	63	746	149	30	411	801	581	61	59202	21889	0.154	81091
24.3	312.21	8.31	1	0.010269	-0.010571	0.009935	0.07673	95640	2.36	79	310	0	197	4820	1192	1095	292291	191	2052	237	133	1800	125066	910	524	559	429	0	6	121	100	1397	0	52096	69	0	0	102	779	0	375	358	558	575	0	61098	22105	0.155	83203
24.4	313.21	8.29	1	0.010269	-0.010571	0.009935	0.07673	96542	2.44	139	395	0	208	4455	1206	1112	301591	152	1916	242	197	1791	128032	762	587	386	361	0	96	42	70	1532	0	52118	108	0	0	322	646	0	320	453	552	715	0	61019	21684	0.154	82703
24.5	314.21	8.28	1	0.010269	-0.010571	0.009935	0.07673	92634	2.28	91	288	0	164	4622	1220	1073	267257	208	1801	233	208	1718	118940	907	542	479	431	0	0	0	0	1409	0	53229	72	81	0	99	835	187	26	259	658	605	0	62000	22303	0.156	84303
24.6	315.21	8.31	1	0.010269	-0.010571	0.009935	0.07673	97229	2.4	80	332	0	121	3579	1457	902	257404	192	1570	211	144	1471	112707	908	605	671	487	0	0	0	0	1399	8	61249	362	0	0	4	709	173	142	342	561	498	0	74641	24187	0.168	98828
24.7	316.21	8.29	1	0.010269	-0.010571	0.009935	0.07673	100109	18.12	67	104	0	0	1313	1323	240	82778	0	836	48	147	620	39854	1528	1022	585	3000	0	0	0	0	1351	1034	25839	1224	0	8	55	0	1076	1601	1328	70	433	0	167144	20079	0.212	187223
24.8	317.21	8.29	1	0.010269	-0.010571	0.009935	0.07673	163212	6.85	14	65	0	142	3377	1277	461	33941	0	2141	0	15	152	26226	1463	1403	1065	18092	0	0	0	824	1446	506	6424	0	0	205	1445	835	660	848	419	0	202	0	244733	23794	0.272	268527

## Sheet: SSW-48
Depth	position (mm)	sample surface	validity	E-gain	E-offset	F-slope	F-offset	cps	MSE	Al	Si	P	S	Cl	Ar	K	Ca	Sc	Ti	V	Cr	Mn	Fe	Co	Ni	Cu	Zn	Ga	Ge	As	Se	Br	Rb	Sr	Y	Zr	Ba	Ta	W	Pb	Fe a*2	Fe a+b	S1	S2	S3	Mo inc	Mo coh	Dt	Inc+coh
0	91.9	7.74	1	0.010269	-0.010571	0.009935	0.07673	115051	2.16	157	1047	0	112	2753	997	2246	51462	0	7084	1202	267	5782	447468	0	287	1532	961	194	0	0	118	1086	243	4245	0	103	51	317	736	122	2074	470	2676	1700	2923	62923	20582	0.158	83505
0.1	92.9	7.78	1	0.010269	-0.010571	0.009935	0.07673	94142	1.81	177	786	0	76	2125	1262	1730	39823	0	5515	866	301	4494	356777	0	251	1256	671	84	0	0	61	843	168	3685	0	88	15	200	665	217	1186	600	2153	1401	2578	57227	18695	0.145	75922
0.2	93.9	7.77	1	0.010269	-0.010571	0.009935	0.07673	94612	1.83	85	756	0	62	2086	1200	1756	39852	0	5405	945	268	4639	360843	16	332	1271	801	154	0	0	38	934	292	3742	0	132	62	206	666	188	1503	427	2206	1345	2731	57229	18596	0.144	75825
0.3	94.9	7.77	1	0.010269	-0.010571	0.009935	0.07673	93910	1.75	81	761	0	94	2160	1236	1761	38991	20	5486	834	282	4732	361976	0	223	1283	703	0	0	0	0	703	201	3472	0	41	94	220	586	123	1047	342	1949	1392	2656	55798	18565	0.142	74363
0.4	95.9	7.77	1	0.010269	-0.010571	0.009935	0.07673	90832	1.77	104	693	0	76	2236	1209	1551	38321	12	5269	876	283	4453	347533	0	246	1183	680	62	31	0	24	785	439	3431	63	169	60	253	641	89	1365	61	2233	1306	2745	54951	18845	0.14	73796
0.5	96.9	7.77	1	0.010269	-0.010571	0.009935	0.07673	89704	1.72	92	643	0	68	2318	1244	1464	36974	6	5035	916	260	4324	343042	0	272	1113	601	48	0	0	0	658	180	3413	64	0	40	209	581	38	990	383	2243	1240	2658	53549	18174	0.14	71723
0.6	97.9	7.78	1	0.010269	-0.010571	0.009935	0.07673	89373	1.59	73	639	0	79	2282	1172	1476	37344	34	4937	833	234	4362	341368	0	213	1213	662	91	0	0	0	898	0	3511	104	0	57	121	560	224	1003	606	2022	1189	3104	53816	18458	0.139	72274
0.7	98.9	7.78	1	0.010269	-0.010571	0.009935	0.07673	90759	1.65	105	686	0	46	2380	1125	1465	38834	0	5135	967	269	4532	346960	0	259	1195	730	132	0	0	63	776	187	3746	51	0	16	230	645	223	1066	430	1993	1333	3048	54095	18489	0.141	72584
0.8	99.9	7.79	1	0.010269	-0.010571	0.009935	0.07673	91305	1.82	112	702	0	70	2192	1190	1650	39634	47	5201	962	284	4487	350959	53	263	1105	655	0	0	0	73	748	40	3654	0	8	33	180	525	79	1109	484	2184	1298	2460	54993	18137	0.14	73130
0.9	100.9	7.79	1	0.010269	-0.010571	0.009935	0.07673	91773	1.76	93	764	5	51	2096	1112	1595	41036	57	5129	805	253	4415	352326	0	242	1283	772	130	47	0	5	808	350	3638	10	0	141	143	578	108	1314	341	2166	1519	3234	54691	18284	0.141	72975
1	101.9	7.8	1	0.010269	-0.010571	0.009935	0.07673	93114	1.81	86	739	0	81	2043	1152	1707	40534	19	5441	951	248	4671	360201	180	224	1298	708	81	86	94	131	713	223	3695	0	148	30	268	529	34	1345	561	1986	1436	2251	54867	18613	0.142	73480
1.1	102.9	7.81	1	0.010269	-0.010571	0.009935	0.07673	91852	1.81	92	717	0	104	2186	1200	1619	39549	89	5403	913	282	4541	353986	0	186	1081	680	76	0	0	58	708	216	3797	159	0	29	284	568	96	1183	595	2197	1371	3032	53987	18268	0.141	72255
1.2	103.9	7.81	1	0.010269	-0.010571	0.009935	0.07673	91809	1.77	100	702	0	76	2257	1148	1605	39077	0	5295	947	291	4494	353313	0	238	1301	745	177	0	0	74	903	113	3443	13	185	58	188	706	110	1115	358	1962	1341	2727	54146	18450	0.141	72596
1.3	104.9	7.82	1	0.010269	-0.010571	0.009935	0.07673	92642	1.72	91	768	0	60	2160	1081	1625	40352	102	5384	904	322	4606	358127	27	292	1203	773	198	83	8	157	760	188	3782	0	211	88	218	576	195	1399	322	1972	1379	2762	54099	18527	0.141	72626
1.4	105.9	7.82	1	0.010269	-0.010571	0.009935	0.07673	93073	1.81	128	818	0	64	2217	1159	1648	41300	0	5545	888	245	4557	359093	0	204	1158	770	81	0	0	0	741	397	3779	23	35	0	232	575	102	1477	169	1716	1358	3360	54245	18803	0.141	73048
1.5	106.9	7.82	1	0.010269	-0.010571	0.009935	0.07673	92303	1.8	142	799	0	84	2065	1146	1593	41185	0	5424	935	286	4528	356303	0	278	1272	771	24	49	52	36	813	238	3852	0	23	0	294	547	83	1267	372	1978	1438	2423	53844	18556	0.141	72400
1.6	107.9	7.83	1	0.010269	-0.010571	0.009935	0.07673	91074	1.74	115	725	0	77	2098	1151	1548	41055	89	5334	852	263	4533	353814	0	256	1264	682	76	201	34	92	794	335	3832	112	136	72	211	451	58	1486	295	2007	1385	2826	53050	18194	0.139	71244
1.7	108.9	7.84	1	0.010269	-0.010571	0.009935	0.07673	89666	1.66	94	746	0	84	2128	1190	1642	39257	45	5215	963	303	4481	348944	0	217	1139	757	103	0	9	55	721	203	3573	35	16	52	198	479	18	1294	313	2001	1288	2981	52589	17988	0.138	70577
1.8	109.9	7.84	1	0.010269	-0.010571	0.009935	0.07673	88374	1.74	86	761	0	94	2068	1105	1532	39210	73	5160	919	227	4357	343763	0	246	1148	673	28	0	0	51	711	171	3606	39	0	36	170	584	266	1076	398	2084	1332	2561	51424	17622	0.137	69046
1.9	110.9	7.85	1	0.010269	-0.010571	0.009935	0.07673	88578	1.74	90	795	0	82	2037	1214	1483	39324	31	5334	889	226	4453	345572	0	217	1247	742	155	0	54	35	783	56	3551	0	75	49	102	685	17	991	481	2108	1192	2586	51703	17766	0.138	69469
2	111.9	7.85	1	0.010269	-0.010571	0.009935	0.07673	90708	1.8	109	727	0	100	2109	1132	1562	40596	0	5275	705	250	4514	353784	0	240	1280	686	128	0	19	60	702	98	3641	9	0	55	164	618	0	1139	615	2120	1423	2580	53009	17963	0.138	70972
2.1	112.9	7.86	1	0.010269	-0.010571	0.009935	0.07673	89874	1.8	59	736	0	56	2119	1176	1552	40332	53	5420	861	268	4420	350478	0	235	1227	657	46	51	0	112	794	170	3479	0	128	23	176	625	235	1033	381	2202	1213	2935	51705	17887	0.137	69592
2.2	113.9	7.86	1	0.010269	-0.010571	0.009935	0.07673	90928	1.79	80	795	0	76	1964	1129	1547	41169	0	5608	895	327	4588	356460	0	292	1232	762	56	27	103	14	691	208	3600	95	20	0	276	641	0	1272	224	2003	1299	2701	52180	17933	0.139	70113
2.3	114.9	7.87	1	0.010269	-0.010571	0.009935	0.07673	87808	1.61	61	771	0	49	2095	1112	1433	39126	0	5062	853	213	4427	342450	60	278	1186	677	86	60	15	138	792	180	3494	0	14	0	237	603	67	984	435	2019	1481	2487	50969	17123	0.136	68092
2.4	115.9	7.88	1	0.010269	-0.010571	0.009935	0.07673	85516	1.62	121	673	0	90	2205	1182	1388	37741	52	4909	840	238	4259	331628	0	255	1157	777	161	0	112	102	658	245	3444	107	130	106	171	681	49	1126	288	2073	1363	2563	49838	17590	0.135	67428
2.5	116.9	7.89	1	0.010269	-0.010571	0.009935	0.07673	87881	1.75	97	690	0	116	2254	1182	1506	38727	82	5012	931	294	4348	343744	0	221	1293	684	76	0	0	0	691	279	3380	0	0	78	163	659	108	1179	278	1993	1414	2932	50911	17884	0.136	68795
2.6	117.9	7.9	1	0.010269	-0.010571	0.009935	0.07673	89048	1.81	79	684	0	63	2247	1102	1490	39555	0	5241	882	260	4390	347516	0	244	1185	634	45	0	47	99	703	281	3315	0	42	62	154	640	123	1253	108	2134	1206	2907	51197	17880	0.137	69077
2.7	118.9	7.9	1	0.010269	-0.010571	0.009935	0.07673	89232	1.68	87	619	0	52	2238	1134	1475	38973	0	5131	941	206	4428	347983	15	275	1198	748	102	0	0	101	651	122	3284	117	14	34	215	645	185	1156	557	1906	1401	3007	51107	17835	0.138	68942
2.8	119.9	7.91	1	0.010269	-0.010571	0.009935	0.07673	91510	1.66	58	690	0	97	2181	1147	1591	40653	64	5270	965	228	4592	358205	0	274	1147	739	48	0	0	83	663	277	3418	0	117	78	295	673	122	1192	215	2186	1402	2663	51995	18345	0.139	70340
2.9	120.9	7.91	1	0.010269	-0.010571	0.009935	0.07673	93008	1.75	121	792	0	15	2093	1147	1600	40929	10	5434	928	336	4539	364081	113	265	1243	787	48	0	0	0	606	245	3309	0	0	54	236	739	197	1364	26	2098	1406	2528	53473	18561	0.14	72034
3	121.9	7.92	1	0.010269	-0.010571	0.009935	0.07673	92267	1.82	90	760	0	137	2149	1135	1619	40369	26	5338	915	329	4503	361301	0	255	1274	770	164	80	65	108	749	225	3576	41	184	85	235	626	113	1159	380	2298	1273	2846	53398	18565	0.14	71963
3.1	122.9	7.93	1	0.010269	-0.010571	0.009935	0.07673	92544	1.8	119	807	0	91	2111	1079	1692	41269	33	5339	951	243	4596	364284	549	245	1184	758	30	0	0	145	754	288	3505	69	77	88	330	674	142	1131	339	2080	1510	1951	53197	18296	0.139	71493
3.2	123.9	7.93	1	0.010269	-0.010571	0.009935	0.07673	93156	1.86	114	767	0	47	1988	1134	1630	41358	0	5640	902	259	4670	366776	0	263	1168	758	111	0	148	134	849	231	3398	0	186	0	248	560	19	1292	370	2115	1415	3487	52797	18363	0.139	71160
3.3	124.9	7.93	1	0.010269	-0.010571	0.009935	0.07673	93381	1.72	91	792	0	48	2091	1107	1657	41931	25	5578	937	306	4552	368835	0	201	1322	612	125	0	52	20	628	306	3551	0	0	59	228	618	105	1444	263	2140	1328	2673	51970	18412	0.14	70382
3.4	125.9	7.94	1	0.010269	-0.010571	0.009935	0.07673	93557	1.86	154	847	0	72	1986	1055	1744	41782	0	5701	969	201	4625	372093	0	247	1155	708	77	0	0	83	780	144	3443	0	48	47	225	553	92	1253	405	2323	1382	2884	52592	18245	0.139	70837
[truncated: 186 more rows]

## Sheet: SW-64
Depth	position (mm)	sample surface	validity	E-gain	E-offset	F-slope	F-offset	cps	MSE	depth (mm)	Al	Si	P	S	Cl	Ar	K	Ca	Sc	Ti	V	Cr	Mn	Fe	Co	Ni	Cu	Zn	Ga	Ge	As	Se	Br	Rb	Sr	Y	Zr	Ba	Ta	W	Pb	Fe a*2	Fe a+b	S1	S2	S3	Mo inc	Mo coh	Dt
[truncated: 615 more rows]
[truncated: 1 more columns]

[truncated: 3 more sheets: SW-80, SW-100, SW-111]
