# Supplementary material for: The seafloor record of explosive submarine volcanic eruptions
Source: Research Square preprint supplement (doi:10.21203/rs.3.rs-6630366/v1), 2025-06-12
Supplement: Supplementary file 4 [file e165a5ea7f8004e3ad394486.xlsx]

## Sheet: COMPONENTRY
		Sample #	Core Name	Core Depth (cm)	Material	Grains Counted (n)	Massive Glass (n)	Crystal-Rich Glass (n)	Crystals (n)	Pumice (n)	Lithics (n)	Organic (n)	Massive Glass (%)	Crystal-rich Glass (%)	Crystals (%)	Pumice (%)	Lithics (%)	Bio/Fora (%)
		1	SW-64	10-11	2022 Deposit	308	263	16	4	8	16	1	85.3896	5.19481	1.2987	2.5974	5.19481	0.324675
		2	SW-64	22 - 23	2022 Deposit	300	202	37	13	17	28	3	67.3333	12.3333	4.33333	5.66667	9.33333	1
		3	SW-64	28 - 29	2022 Deposit	315	193	65	20	12	25	0	61.2698	20.6349	6.34921	3.80952	7.93651	0
		4	SW-64	34 - 35	2022 Deposit	305	168	71	23	19	23	1	55.082	23.2787	7.54098	6.22951	7.54098	0.327869
		5	SW-64	41 - 42	Pre-2022	300	100	34	9	16	21	120	33.3333	11.3333	3	5.33333	7	40
